# Supplementary material for: Accept–reject decision-making revealed via a quantitative and ethological study of C. elegans foraging
Source: eLife. 2025 Sep 10;13:RP103191. doi: 10.7554/eLife.103191 (PMC12422737; doi:10.7554/eLife.103191)
Supplement: Figure 1—source data 1. [file elife-103191-fig1-data1.xlsx]

## Sheet: Sheet1
Figure 1 - Source Data 1
Figure 1D - Number of total and unique patch encounters
Summary Statistics
	encounter type	# worms	mean	std	median	2.5%	97.5%
	total	50	8.38	4.40728	7.5	2.5	19.75
	unique	50	5.3	2.29685	5	1	10.25
Source Data
	worm #	total encounters	unique encounters
	1	17	11
	2	6	5
	3	5	3
	4	9	3
	5	7	6
	6	9	6
	7	7	5
	8	11	9
	9	11	9
	10	11	7
	11	16	9
	12	7	2
	13	8	5
	14	4	3
	15	6	6
	16	8	6
	17	8	6
	18	12	6
	19	6	2
	20	10	8
	21	9	5
	22	6	5
	23	11	7
	24	7	1
	25	6	6
	26	4	2
	27	15	6
	28	13	8
	29	10	5
	30	3	2
	31	8	5
	32	7	5
	33	4	4
	34	6	4
	35	14	10
	36	12	5
	37	4	2
	38	4	3
	39	6	5
	40	1	1
	41	8	6
	42	8	5
	43	7	5
	44	5	4
	45	6	4
	46	5	5
	47	28	9
	48	9	7
	49	9	6
	50	6	6
