# Supplementary material for: Accept–reject decision-making revealed via a quantitative and ethological study of C. elegans foraging
Source: eLife. 2025 Sep 10;13:RP103191. doi: 10.7554/eLife.103191 (PMC12422737; doi:10.7554/eLife.103191)
Supplement: Figure 1—source data 3. [file elife-103191-fig1-data3.xlsx]

## Sheet: Sheet1
Figure 1 - Source Data 3
Figure 1F - Start time of patch encounters
Summary Statistics
	encounter type	# worms	# encounters	mean	std	median	2.5%	97.5%	p value		* mean, std, median, and 95% CI are given in minutes
	short	50	313	12.8883	13.3432	8.39702	0	56.819	2.96088e-18		* p value calculated using one-tailed Mann-Whitney U-Test
	long	50	106	26.4885	14.6547	24.4767	4.49768	53.8496
Source Data
	worm #	encounter #	time enter (min)	duration (min)	log10(duration)	p(long duration)	label
	1	1	1.00031	0.266749	-0.573897	1.10398e-06	short
	1	2	1.85613	0.316765	-0.499263	2.68087e-06	short
	1	3	3.52331	1.26706	0.102797	0.0118852	short
	1	4	5.56284	0.383452	-0.416289	7.48342e-06	short
	1	5	11.6758	0.316765	-0.499263	2.68087e-06	short
	1	6	12.2427	0.333437	-0.476987	3.51693e-06	short
	1	7	13.7932	0.527941	-0.277414	4.5854e-05	short
	1	8	14.7212	0.472369	-0.325719	2.40827e-05	short
	1	9	17.7833	0.805805	-0.0937698	0.000604315	short
	1	10	18.9892	4.7737	0.678855	0.996699	long
	1	11	24.0463	0.30565	-0.514775	2.22314e-06	short
	1	12	25.1745	0.539056	-0.268366	5.18149e-05	short
	1	13	26.3026	0.616858	-0.209815	0.000115664	short
	1	14	27.3085	0.63353	-0.198233	0.000135913	short
	1	15	29.2535	1.65051	0.217619	0.0714972	short
	1	16	32.9324	14.2433	1.15361	1	long
	1	17	48.126	11.8703	1.07446	0.999999	long
	2	1	0.87805	0.51127	-0.29135	3.80236e-05	short
	2	2	1.70608	0.372338	-0.429063	6.37187e-06	short
	2	3	2.76197	0.955852	-0.0196094	0.00181378	short
	2	4	4.40692	41.4573	1.6176	1	long
	2	5	46.0865	13.9099	1.14332	1	long
	3	1	0.978081	0.389009	-0.41004	8.09879e-06	short
	3	2	3.82896	0.616858	-0.209815	0.000115664	short
	3	3	7.16889	0.772462	-0.112123	0.000462735	short
	3	4	8.30813	8.82496	0.945713	0.999985	long
	3	5	21.5511	0.583514	-0.233949	8.28605e-05	short
	3	6	25.4134	34.5829	1.53886	1	long
	4	1	1.32263	0.322321	-0.491711	2.93827e-06	short
	4	2	9.85858	0.75023	-0.124806	0.000385246	short
	4	3	12.6261	0.444581	-0.352049	1.7056e-05	short
	4	4	21.0842	0.216733	-0.664075	3.95568e-07	short
	4	5	33.5936	0.461253	-0.336061	2.10201e-05	short
	4	6	46.731	13.2652	1.12271	1	long
	5	1	0	0.0555726	-1.25514	1.63286e-09	short
	5	2	0.633528	0.616856	-0.209816	0.000115662	short
	5	3	2.94535	0.539054	-0.268368	5.18139e-05	short
	5	4	19.456	40.5402	1.60789	1	long
	6	1	0.655759	0.600186	-0.221714	9.8081e-05	short
	6	2	1.98951	0.483483	-0.315619	2.75213e-05	short
	6	3	3.25101	0.539056	-0.268366	5.18149e-05	short
	6	4	5.37945	0.105588	-0.976384	1.66435e-08	short
	6	5	6.81878	0.138932	-0.857198	5.1957e-08	short
	6	6	7.65793	1.1059	0.0437152	0.00475281	short
	6	7	10.8978	3.10096	0.491496	0.899492	long
	6	8	14.3989	0.494598	-0.305748	3.13746e-05	short
	6	9	17.172	0.12226	-0.912715	3.02437e-08	short
	6	10	17.7499	0.272307	-0.564942	1.22576e-06	short
	6	11	23.9352	0.377895	-0.422629	6.90854e-06	short
	6	12	26.0414	6.45756	0.810068	0.999752	long
	6	13	33.2825	0.250078	-0.601925	7.98165e-07	short
	6	14	35.0887	0.30565	-0.514775	2.22314e-06	short
	6	15	37.9395	22.0513	1.34343	1	long
	7	1	3.5788	0.122257	-0.912725	3.02408e-08	short
	7	2	6.11842	0.450129	-0.346663	1.82969e-05	short
	7	3	8.24681	0.277857	-0.556178	1.3586e-06	short
	7	4	9.64721	0.533486	-0.272877	4.87492e-05	short
	7	5	12.4536	8.66359	0.937698	0.999982	long
	7	6	21.5117	0.577943	-0.238115	7.82527e-05	short
	7	7	22.4453	0.539043	-0.268376	5.18078e-05	short
	7	8	24.6126	0.500143	-0.300905	3.3465e-05	short
	7	9	26.3687	33.6263	1.52668	1	long
	8	1	0.177829	0.689086	-0.161726	0.000227217	short
	8	2	7.09648	0.522372	-0.28202	4.30965e-05	short
	8	3	11.8867	0.722429	-0.141205	0.000304401	short
	8	4	15.799	0.411229	-0.385916	1.10125e-05	short
	8	5	18.3886	0.450129	-0.346663	1.82969e-05	short
	8	6	19.4667	0.455686	-0.341334	1.96168e-05	short
	8	7	22.1786	0.744658	-0.128043	0.000367694	short
	8	8	23.5012	36.4938	1.56222	1	long
	9	1	0.866915	0.666858	-0.175967	0.000185765	short
	9	2	4.30123	0.99473	-0.00229496	0.0023552	short
	9	3	9.2082	14.2485	1.15377	1	long
	9	4	25.3795	8.39685	0.924116	0.999976	long
	9	5	35.8214	21.4673	1.33178	1	long
	9	6	58.5168	1.4782	0.169734	0.0339596	short
	10	1	1.8339	0.300093	-0.522744	2.02044e-06	short
	10	2	2.60636	0.500155	-0.300895	3.34696e-05	short
	10	3	5.66842	2.57858	0.41138	0.679786	long
	10	4	9.70857	0.700217	-0.154767	0.000250832	short
	10	5	16.0883	0.894722	-0.048312	0.0011808	short
	10	6	17.6277	42.3687	1.62705	1	long
	11	1	1.25036	1.06697	0.0281532	0.00374344	short
	11	2	3.8511	0.255629	-0.59239	8.90798e-07	short
	11	3	6.00172	0.2723	-0.564952	1.22562e-06	short
	11	4	8.43575	9.88061	0.994784	0.999995	long
	11	5	24.307	35.688	1.55252	1	long
	12	1	0.405681	0.216734	-0.664073	3.95575e-07	short
	12	2	1.22816	0.24452	-0.611685	7.1373e-07	short
	12	3	2.31739	0.361223	-0.442224	5.40471e-06	short
	12	4	3.92344	1.43378	0.156482	0.0275842	short
	12	5	7.53011	0.45014	-0.346653	1.82993e-05	short
	12	6	8.31369	0.716889	-0.144548	0.000290187	short
	12	7	14.0766	0.500155	-0.300895	3.34696e-05	short
	12	8	15.616	32.5823	1.51298	1	long
	12	9	49.871	10.1198	1.00517	0.999996	long
	13	1	12.7373	1.57827	0.19818	0.0529545	short
	13	2	14.8324	1.21149	0.0833187	0.00877162	short
	13	3	16.8608	0.75579	-0.121599	0.00040348	short
	13	4	18.6947	0.661316	-0.179591	0.000176517	short
	13	5	19.7117	1.10034	0.0415273	0.00459559	short
	13	6	21.7623	0.539056	-0.268366	5.18149e-05	short
	13	7	23.4239	1.07811	0.0326639	0.00401113	short
	13	8	24.8855	0.211177	-0.675354	3.49137e-07	short
	13	9	25.9358	7.0633	0.849008	0.999888	long
	13	10	34.3718	25.6191	1.40856	1	long
	14	1	2.36735	0.822458	-0.0848863	0.000688167	short
	14	2	4.72913	11.57	1.06333	0.999999	long
	14	3	18.3441	1.61157	0.20725	0.0609453	short
	14	4	20.4559	6.72415	0.827637	0.999826	long
	14	5	27.8635	0.327872	-0.484296	3.21615e-06	short
	14	6	28.6415	0.555715	-0.255148	6.19993e-05	short
	14	7	44.9129	15.0821	1.17846	1	long
	15	1	1.33927	0.405672	-0.391825	1.02106e-05	short
	15	2	3.79553	0.400115	-0.397815	9.45929e-06	short
	15	3	4.61799	0.477915	-0.32065	2.57492e-05	short
	15	4	6.31292	0.300086	-0.522754	2.02019e-06	short
	15	5	8.84698	0.222286	-0.653088	4.47061e-07	short
	15	6	9.41381	0.316757	-0.499273	2.68054e-06	short
	15	7	12.0479	0.461243	-0.33607	2.10177e-05	short
	15	8	13.1704	0.633515	-0.198243	0.000135894	short
	15	9	15.5545	7.75222	0.889426	0.999951	long
	15	10	27.3134	32.6816	1.5143	1	long
	16	1	0.733544	0.439015	-0.357521	1.58846e-05	short
	16	2	2.2562	0.755772	-0.121609	0.000403421	short
	16	3	5.07923	0.4279	-0.368657	1.37507e-05	short
	16	4	8.77474	0.316757	-0.499273	2.68054e-06	short
	16	5	11.5755	0.377886	-0.422639	6.90765e-06	short
	16	6	13.0537	0.778001	-0.10902	0.000484029	short
	16	7	16.5659	38.7055	1.58777	1	long
	16	8	58.3556	1.63936	0.214674	0.0683358	short
	17	1	0.494586	0.394558	-0.40389	8.75587e-06	short
	17	2	1.52266	0.483472	-0.315629	2.75176e-05	short
	17	3	3.65105	0.611286	-0.213755	0.000109507	short
	17	4	9.4805	0.811344	-0.0907951	0.000631155	short
	17	5	14.4764	0.966944	-0.0145987	0.00195587	short
	17	6	16.7659	6.85196	0.835815	0.999853	long
	17	7	27.7246	32.2704	1.5088	1	long
	18	1	7.00217	0.711332	-0.147928	0.000276512	short
	18	2	10.9034	0.750233	-0.124804	0.000385254	short
	18	3	15.6437	23.7907	1.37641	1	long
	18	4	40.7626	0.361223	-0.442224	5.40471e-06	short
	18	5	41.6963	0.355666	-0.448958	4.97021e-06	short
	18	6	42.6577	0.661316	-0.179591	0.000176517	short
	18	7	44.0025	0.394567	-0.403879	8.75699e-06	short
	18	8	47.1035	0.42791	-0.368647	1.37525e-05	short
	18	9	49.8099	10.1865	1.00802	0.999996	long
	19	1	0	0.272306	-0.564943	1.22574e-06	short
	19	2	6.88545	12.5928	1.10012	0.999999	long
	19	3	24.3464	4.60141	0.662891	0.995513	long
	19	4	36.5946	23.4016	1.36925	1	long
	20	1	2.10616	0.416786	-0.380087	1.18678e-05	short
	20	2	2.8786	0.166714	-0.778027	1.16148e-07	short
	20	3	6.41851	0.338986	-0.469818	3.84044e-06	short
	20	4	10.3752	0.494586	-0.305758	3.13704e-05	short
	20	5	13.1204	0.933601	-0.0298387	0.00155566	short
	20	6	15.2099	0.500143	-0.300905	3.3465e-05	short
	20	7	17.4272	0.722429	-0.141205	0.000304401	short
	20	8	22.0008	25.2295	1.40191	1	long
	20	9	47.8637	12.1313	1.08391	0.999999	long
	21	1	0.227843	0.238957	-0.62168	6.36901e-07	short
	21	2	2.03947	0.200057	-0.698845	2.69868e-07	short
	21	3	2.58407	0.188943	-0.723669	2.06331e-07	short
	21	4	8.01897	0.188943	-0.723669	2.06331e-07	short
	21	5	10.3974	0.211172	-0.675364	3.49097e-07	short
	21	6	15.4266	0.316757	-0.499273	2.68054e-06	short
	21	7	16.1324	8.08009	0.907416	0.999966	long
	21	8	26.0797	0.216729	-0.664083	3.9553e-07	short
	21	9	28.6804	0.716872	-0.144558	0.000290145	short
	21	10	31.0978	12.5147	1.09742	0.999999	long
	21	11	45.652	14.343	1.15664	1	long
	22	1	2.0617	0.227843	-0.642364	5.04139e-07	short
	22	2	4.90696	0.633515	-0.198243	0.000135894	short
	22	3	6.04062	3.71218	0.569628	0.974238	long
	22	4	10.2696	12.3758	1.09257	0.999999	long
	22	5	24.7182	0.211172	-0.675364	3.49097e-07	short
	22	6	25.1628	0.416786	-0.380087	1.18678e-05	short
	22	7	27.2578	0.661301	-0.179601	0.000176492	short
	22	8	28.5693	0.172272	-0.763786	1.3478e-07	short
	22	9	29.7863	0.811344	-0.0907951	0.000631155	short
	22	10	35.6825	9.06371	0.957306	0.999988	long
	22	11	45.7576	12.5036	1.09703	0.999999	long
	22	12	58.7668	1.22813	0.0892443	0.00961946	short
	23	1	5.70732	0.689103	-0.161716	0.000227249	short
	23	2	9.22508	0.261192	-0.58304	9.92604e-07	short
	23	3	10.67	0.955852	-0.0196094	0.00181378	short
	23	4	13.2486	0.544613	-0.263912	5.50383e-05	short
	23	5	14.5156	4.92931	0.692786	0.997479	long
	23	6	20.0395	0.322322	-0.49171	2.93832e-06	short
	23	7	23.0738	0.42791	-0.368647	1.37525e-05	short
	23	8	26.0414	0.822477	-0.0848761	0.000688269	short
	23	9	29.0312	0.394567	-0.403879	8.75699e-06	short
	23	10	29.9037	0.622415	-0.20592	0.000122102	short
	23	11	31.3431	28.6478	1.45709	1	long
	24	1	0.644642	0.216733	-0.664075	3.95568e-07	short
	24	2	1.85057	0.439024	-0.357512	1.58864e-05	short
	24	3	4.707	0.433466	-0.363045	1.47863e-05	short
	24	4	5.56282	0.522382	-0.282011	4.31015e-05	short
	24	5	6.64648	0.372336	-0.429064	6.37176e-06	short
	24	6	7.3078	0.444581	-0.352049	1.7056e-05	short
	24	7	7.96911	1.12257	0.0502121	0.00525281	short
	24	8	12.4816	0.416794	-0.380078	1.18692e-05	short
	24	9	17.3609	0.138931	-0.857199	5.19563e-08	short
	24	10	17.9388	13.4375	1.12832	1	long
	24	11	33.0268	26.9638	1.43078	1	long
	25	1	2.55634	0.277863	-0.556169	1.35874e-06	short
	25	2	6.5798	0.522382	-0.282011	4.31015e-05	short
	25	3	8.39702	0.739116	-0.131288	0.00035093	short
	25	4	10.8811	0.416794	-0.380078	1.18692e-05	short
	25	5	12.6983	0.894719	-0.0483134	0.00118078	short
	25	6	16.744	0.394565	-0.403881	8.75683e-06	short
	25	7	26.3081	20.0284	1.30165	1	long
	25	8	47.1645	12.8262	1.1081	1	long
	26	1	0	0.322321	-0.491711	2.93827e-06	short
	26	2	0.672428	0.555726	-0.255139	6.20067e-05	short
	26	3	1.54492	0.322321	-0.491711	2.93827e-06	short
	26	4	2.81197	0.683543	-0.165234	0.000216193	short
	26	5	5.05711	0.900276	-0.0456243	0.00122898	short
	26	6	7.22444	0.133374	-0.874928	4.36211e-08	short
	26	7	9.64185	0.177832	-0.749989	1.55863e-07	short
	26	8	10.0475	0.639085	-0.194441	0.00014331	short
	26	9	12.9317	8.50816	0.929836	0.999979	long
	26	10	23.6739	0.272306	-0.564943	1.22574e-06	short
	26	11	25.0466	0.22229	-0.653079	4.47104e-07	short
	26	12	28.9311	8.45259	0.92699	0.999978	long
	26	13	38.6063	21.3843	1.3301	1	long
	27	1	0.361215	0.327872	-0.484296	3.21615e-06	short
	27	2	1.03363	0.377886	-0.422639	6.90765e-06	short
	27	3	1.88387	0.439015	-0.357521	1.58846e-05	short
	27	4	2.88416	0.322315	-0.49172	2.93795e-06	short
	27	5	6.95755	0.533486	-0.272877	4.87492e-05	short
	27	6	17.9885	7.42435	0.870658	0.999928	long
	27	7	38.5277	21.4673	1.33178	1	long
	28	1	0	0.611286	-0.213755	0.000109507	short
	28	2	1.00584	1.7505	0.243163	0.105282	short
	28	3	3.02309	37.3885	1.57274	1	long
	28	4	42.2566	3.47322	0.540732	0.956702	long
	28	5	47.9248	4.41793	0.645219	0.993712	long
	28	6	55.6048	0.655744	-0.183266	0.000167623	short
	28	7	56.7051	2.80636	0.448143	0.80347	long
	29	1	0.355658	0.516815	-0.286665	4.04889e-05	short
	29	2	1.40596	0.600172	-0.221724	9.80673e-05	short
	29	3	7.40768	0.900258	-0.045633	0.00122882	short
	29	4	8.95257	39.1057	1.59224	1	long
	29	5	50.3422	0.761329	-0.118427	0.00042239	short
	29	6	57.0552	2.93973	0.468308	0.854593	long
	30	1	0	0.105588	-0.976386	1.66433e-08	short
	30	2	1.67274	0.333436	-0.476988	3.51687e-06	short
	30	3	3.15097	0.522382	-0.282011	4.31015e-05	short
	30	4	4.95708	0.511268	-0.291351	3.80229e-05	short
	30	5	6.05741	0.672428	-0.172354	0.000195481	short
	30	6	8.79714	0.322321	-0.491711	2.93827e-06	short
	30	7	11.8092	0.505711	-0.296098	3.56833e-05	short
	30	8	15.4547	0.233405	-0.63189	5.67304e-07	short
	30	9	16.3272	40.2401	1.60466	1	long
	30	10	58.4679	0.555726	-0.255139	6.20067e-05	short
	30	11	59.4127	0.577955	-0.238106	7.8262e-05	short
	31	1	0	0.0500153	-1.3009	1.16748e-09	short
	31	2	1.32263	0.238962	-0.621671	6.36964e-07	short
	31	3	6.76874	0.372336	-0.429064	6.37176e-06	short
	31	4	7.51897	0.983635	-0.00716603	0.00218796	short
	31	5	9.42511	0.644642	-0.190681	0.000151056	short
	31	6	10.4865	0.516825	-0.286656	4.04936e-05	short
	31	7	11.9203	8.29143	0.91863	0.999973	long
	31	8	20.5952	0.311207	-0.506951	2.44284e-06	short
	31	9	21.84	0.411237	-0.385908	1.10137e-05	short
	31	10	22.7181	0.661314	-0.179592	0.000176513	short
	31	11	24.5242	19.2559	1.28456	1	long
	31	12	46.0475	13.9432	1.14436	1	long
	32	1	0.127817	0.327878	-0.484287	3.21649e-06	short
	32	2	0.989192	0.489039	-0.310657	2.9393e-05	short
	32	3	2.912	0.161161	-0.792741	9.97269e-08	short
	32	4	4.84593	0.18339	-0.736625	1.79625e-07	short
	32	5	9.0361	0.305649	-0.514777	2.2231e-06	short
	32	6	13.2485	0.516825	-0.286656	4.04936e-05	short
	32	7	14.1599	0.577955	-0.238106	7.8262e-05	short
	32	8	16.2717	43.719	1.64067	1	long
	33	1	1.52822	0.355658	-0.448968	4.96958e-06	short
	33	2	2.23953	0.500143	-0.300905	3.3465e-05	short
	33	3	3.55658	0.644629	-0.19069	0.000151038	short
	33	4	7.79112	0.411229	-0.385916	1.10125e-05	short
	33	5	17.216	35.6658	1.55225	1	long
	33	6	54.1822	5.81278	0.764384	0.999382	long
	34	1	4.38459	0.583501	-0.233959	8.28489e-05	short
	34	2	8.46909	0.783558	-0.105929	0.000506244	short
	34	3	10.0696	0.0722429	-1.1412	3.98116e-09	short
	34	4	10.3808	49.6142	1.69561	1	long
	35	1	0.161157	0.244515	-0.611695	7.13648e-07	short
	35	2	1.20034	0.327872	-0.484296	3.21615e-06	short
	35	3	4.28456	0.583501	-0.233959	8.28489e-05	short
	35	4	6.93532	0.355658	-0.448968	4.96958e-06	short
	35	5	9.31378	0.522372	-0.28202	4.30965e-05	short
	35	6	12.3035	0.583501	-0.233959	8.28489e-05	short
	35	7	14.3875	0.494586	-0.305758	3.13704e-05	short
	35	8	17.405	0.1945	-0.71108	2.36312e-07	short
	35	9	18.1107	0.416786	-0.380087	1.18678e-05	short
	35	10	18.9221	0.389	-0.41005	8.09775e-06	short
	35	11	20.2558	0.455686	-0.341334	1.96168e-05	short
	35	12	21.3506	0.522372	-0.28202	4.30965e-05	short
	35	13	23.7846	18.8943	1.27633	1	long
	35	14	43.4124	16.5825	1.21965	1	long
	36	1	0.516815	0.316757	-0.499273	2.68054e-06	short
	36	2	2.32289	0.288972	-0.539145	1.6616e-06	short
	36	3	3.27316	0.1167	-0.932929	2.49524e-08	short
	36	4	4.51796	0.288972	-0.539145	1.6616e-06	short
	36	5	9.43048	0.850244	-0.0704566	0.00085073	short
	36	6	13.3316	1.58379	0.199697	0.0542162	short
	36	7	17.0882	42.9067	1.63253	1	long
	37	1	0	0.105586	-0.976394	1.66419e-08	short
	37	2	5.67941	0.227843	-0.642364	5.04139e-07	short
	37	3	11.0143	0.516815	-0.286665	4.04889e-05	short
	37	4	12.8926	19.2722	1.28493	1	long
	37	5	34.7377	14.582	1.16382	1	long
	37	6	49.8087	10.1863	1.00801	0.999996	long
	38	1	0.277864	0.422353	-0.374324	1.27812e-05	short
	38	2	1.05588	0.394567	-0.403879	8.75699e-06	short
	38	3	6.80767	1.27817	0.10659	0.0126113	short
	38	4	8.95833	51.038	1.70789	1	long
	39	1	8.11916	51.8715	1.71493	1	long
	40	1	5.79622	0.944734	-0.0246904	0.00168049	short
	40	2	6.97992	5.56282	0.745295	0.999098	long
	40	3	12.9651	0.561283	-0.250818	6.57685e-05	short
	40	4	15.3269	3.979	0.599774	0.985209	long
	40	5	22.707	37.2892	1.57158	1	long
	41	1	0	0.255629	-0.59239	8.90798e-07	short
	41	2	0.750215	0.238957	-0.62168	6.36901e-07	short
	41	3	16.2046	0.322315	-0.49172	2.93795e-06	short
	41	4	18.9999	12.6092	1.10069	0.999999	long
	41	5	35.0212	0.4279	-0.368657	1.37507e-05	short
	41	6	37.3385	0.922487	-0.0350399	0.00143918	short
	41	7	38.7611	9.66944	0.985401	0.999993	long
	41	8	49.8587	9.60831	0.982647	0.999993	long
	41	9	59.9005	0.0944715	-1.0247	1.07554e-08	short
	42	1	0	0.150043	-0.823784	7.26192e-08	short
	42	2	0.4279	0.305643	-0.514785	2.22286e-06	short
	42	3	1.99502	0.361215	-0.442235	5.40403e-06	short
	42	4	5.14592	0.1167	-0.932929	2.49524e-08	short
	42	5	6.42962	0.4279	-0.368657	1.37507e-05	short
	42	6	9.93618	8.95257	0.951948	0.999987	long
	42	7	19.5612	4.01226	0.603389	0.986171	long
	42	8	24.4292	35.5658	1.55103	1	long
	43	1	7.37434	0.450129	-0.346663	1.82969e-05	short
	43	2	17.7718	0.694644	-0.158238	0.000238754	short
	43	3	18.8221	0.672415	-0.172363	0.000195457	short
	43	4	20.9227	9.70834	0.987145	0.999994	long
	43	5	31.2089	0.444572	-0.352058	1.70541e-05	short
	43	6	34.6377	25.3573	1.4041	1	long
	44	1	0.344543	0.338986	-0.469818	3.84044e-06	short
	44	2	4.45683	20.6781	1.31551	1	long
	44	3	26.4187	0.589058	-0.229842	8.76768e-05	short
	44	4	29.9586	30.0364	1.47765	1	long
	45	1	18.6224	8.24697	0.916295	0.999972	long
	45	2	27.2028	20.2395	1.3062	1	long
	45	3	48.9317	11.0645	1.04393	0.999998	long
	46	1	0	0.505701	-0.296107	3.56792e-05	short
	46	2	1.48932	0.772444	-0.112133	0.000462667	short
	46	3	3.30095	0.472358	-0.325729	2.40795e-05	short
	46	4	4.00115	0.483472	-0.315629	2.75176e-05	short
	46	5	5.88502	0.183386	-0.736634	1.79608e-07	short
	46	6	10.5919	40.2838	1.60513	1	long
	46	7	51.9649	8.03008	0.90472	0.999964	long
	47	1	0.616856	0.800245	-0.0967768	0.000578374	short
	47	2	2.47854	0.288978	-0.539136	1.66177e-06	short
	47	3	3.12318	0.288978	-0.539136	1.66177e-06	short
	47	4	3.84007	0.216733	-0.664075	3.95568e-07	short
	47	5	4.31243	0.361222	-0.442226	5.40461e-06	short
	47	6	5.36276	0.272306	-0.564943	1.22574e-06	short
	47	7	5.94071	0.322321	-0.491711	2.93827e-06	short
	47	8	6.58535	0.277863	-0.556169	1.35874e-06	short
	47	9	7.3078	0.244519	-0.611687	7.13718e-07	short
	47	10	8.39146	0.566841	-0.246539	6.97259e-05	short
	47	11	9.38621	0.422352	-0.374326	1.2781e-05	short
	47	12	11.4591	0.577955	-0.238106	7.8262e-05	short
	47	13	13.7876	0.394565	-0.403881	8.75683e-06	short
	47	14	14.6934	1.47267	0.168107	0.0331043	short
	47	15	17.4442	2.32293	0.366037	0.48899	short
	47	16	20.9064	0.166718	-0.778018	1.16158e-07	short
	47	17	21.5344	0.350107	-0.455799	4.56583e-06	short
	47	18	23.4294	0.394565	-0.403881	8.75683e-06	short
	47	19	24.4186	0.350107	-0.455799	4.56583e-06	short
	47	20	25.33	0.338993	-0.469809	3.84085e-06	short
	47	21	27.2306	0.177832	-0.749989	1.55863e-07	short
	47	22	28.2198	0.516825	-0.286656	4.04936e-05	short
	47	23	29.6869	0.577955	-0.238106	7.8262e-05	short
	47	24	30.5594	0.511268	-0.291351	3.80229e-05	short
	47	25	32.5767	0.427909	-0.368649	1.37523e-05	short
	47	26	34.2383	5.34053	0.727584	0.998722	long
	47	27	41.8851	7.70236	0.886624	0.999948	long
	47	28	49.9542	10.0364	1.00158	0.999995	long
	48	1	1.70608	0.205619	-0.686936	3.07375e-07	short
	48	2	2.66194	0.200062	-0.698835	2.69898e-07	short
	48	3	4.47361	1.46156	0.164818	0.03144	short
	48	4	7.68572	0.650202	-0.186952	0.000159166	short
	48	5	8.73604	0.161161	-0.79274	9.97284e-08	short
	48	6	9.43626	0.42791	-0.368647	1.37525e-05	short
	48	7	11.6481	0.233406	-0.631889	5.67313e-07	short
	48	8	15.6104	0.483483	-0.315619	2.75213e-05	short
	48	9	20.7453	0.655759	-0.183256	0.000167647	short
	48	10	27.0695	6.82434	0.834061	0.999848	long
	48	11	34.1828	0.416796	-0.380077	1.18694e-05	short
	48	12	35.4943	0.477926	-0.320639	2.57526e-05	short
	48	13	37.3227	17.6721	1.24729	1	long
	48	14	56.4064	0.344551	-0.462746	4.19005e-06	short
	48	15	57.0177	0.5724	-0.242301	7.38889e-05	short
	48	16	59.5963	0.400124	-0.397805	9.46051e-06	short
	49	1	0	1.01696	0.0073031	0.00272413	short
	49	2	2.37846	0.844687	-0.0733044	0.000815779	short
	49	3	5.86835	0.2334	-0.631899	5.67248e-07	short
	49	4	8.14122	0.200057	-0.698845	2.69868e-07	short
	49	5	8.91367	36.4716	1.56195	1	long
	49	6	53.8932	0.422343	-0.374334	1.27796e-05	short
	50	1	0.516827	0.483483	-0.315619	2.75213e-05	short
	50	2	1.31707	0.355666	-0.448958	4.97021e-06	short
	50	3	1.97839	0.51127	-0.29135	3.80236e-05	short
	50	4	6.21304	0.322322	-0.49171	2.93832e-06	short
	50	5	6.76321	0.350109	-0.455797	4.56591e-06	short
	50	6	7.40785	0.42791	-0.368647	1.37525e-05	short
	50	7	23.9685	0.666873	-0.175957	0.000185791	short
	50	8	27.9809	32.0155	1.50536	1	long
