# Supplementary material for: Accept–reject decision-making revealed via a quantitative and ethological study of C. elegans foraging
Source: eLife. 2025 Sep 10;13:RP103191. doi: 10.7554/eLife.103191 (PMC12422737; doi:10.7554/eLife.103191)
Supplement: Figure 1—source data 4. [file elife-103191-fig1-data4.xlsx]

## Sheet: Sheet1
Figure 1 - Source Data 4
Figure 1G - On patch residence
Summary Statistics
	patch locations	# worms	# replicates	replicate type		* patch locations were semi-randomly permuted as described in Figure 1 - supplement 4
	original	50	1000	bootstrapped samples
	permuted	50	1000	permutations of patch location
Contingency Tables (i.e. # replicates on or off patch given original and permuted patch locations)
	time (min)	original - off patch	original - on patch	permuted - off patch	permuted - on patch	p-value	adjusted p-value		* animal "on patch" if midpoint distance was within 0.46024 mm from patch edge)
	0	36	14	41215	8785	0.0457815	0.0499283		* p-value computed using one-tailed Fisher's Exact Test and adjusted using Benjamini-Hochberg method for multiple comparisons
	0.0166667	37	13	41267	8733	0.0849886	0.0910051
	0.0333333	38	12	41174	8826	0.160112	0.167219
	0.05	40	10	41229	8771	0.379132	0.385776
	0.0666667	42	8	41289	8711	0.661852	0.663696
	0.0833333	42	8	41279	8721	0.663199	0.664861
	0.1	42	8	41334	8666	0.655756	0.657766
	0.116667	43	7	41374	8626	0.782346	0.782998
	0.133333	41	9	41381	8619	0.501264	0.504911
	0.15	40	10	41384	8616	0.356912	0.363372
	0.166667	39	11	41376	8624	0.235005	0.243039
	0.183333	37	13	41372	8628	0.0787182	0.0845422
	0.2	38	12	41447	8553	0.135547	0.142597
	0.216667	38	12	41457	8543	0.134691	0.141739
	0.233333	38	12	41466	8534	0.133924	0.140972
	0.25	38	12	41509	8491	0.130293	0.137311
	0.266667	39	11	41516	8484	0.218607	0.226341
	0.283333	41	9	41660	8340	0.459043	0.46316
	0.3	41	9	41639	8361	0.462237	0.46599
	0.316667	41	9	41720	8280	0.449909	0.454198
	0.333333	41	9	41697	8303	0.453411	0.457606
	0.35	39	11	41647	8353	0.203752	0.211142
	0.366667	37	13	41682	8318	0.0620427	0.0669726
	0.383333	37	13	41729	8271	0.0597482	0.0646703
	0.4	37	13	41774	8226	0.0576075	0.0624471
	0.416667	37	13	41812	8188	0.0558422	0.06057
	0.433333	36	14	41810	8190	0.0269419	0.0298341
	0.45	36	14	41830	8170	0.0264323	0.0292968
	0.466667	38	12	41780	8220	0.10877	0.11527
	0.483333	39	11	41836	8164	0.183203	0.190176
	0.5	38	12	41876	8124	0.101711	0.108107
	0.516667	37	13	41960	8040	0.0493303	0.0537172
	0.533333	38	12	41966	8034	0.0953615	0.101659
	0.55	38	12	42024	7976	0.0914071	0.0976745
	0.566667	38	12	42026	7974	0.0912726	0.0975598
	0.583333	38	12	42050	7950	0.0896693	0.0958745
	0.6	38	12	42059	7941	0.0890727	0.095265
	0.616667	37	13	42069	7931	0.0448949	0.0490208
	0.633333	37	13	41998	8002	0.0477499	0.0520277
	0.65	36	14	41953	8047	0.023458	0.0261209
	0.666667	35	15	41874	8126	0.0111145	0.0125234
	0.683333	34	16	41932	8068	0.00417166	0.0047661
	0.7	36	14	41981	8019	0.0228184	0.0254322
	0.716667	37	13	42067	7933	0.0449736	0.0490919
	0.733333	36	14	42076	7924	0.0207479	0.0231892
	0.75	36	14	42013	7987	0.0221039	0.0246818
	0.766667	36	14	42012	7988	0.022126	0.0246988
	0.783333	36	14	42031	7969	0.0217097	0.0242491
	0.8	35	15	42058	7942	0.0090401	0.0102341
	0.816667	36	14	42000	8000	0.022392	0.024988
	0.833333	36	14	42000	8000	0.022392	0.024988
	0.85	37	13	41912	8088	0.0513796	0.0558643
	0.866667	38	12	41951	8049	0.0964017	0.102707
	0.883333	39	11	41909	8091	0.175559	0.182609
	0.9	40	10	41912	8088	0.283659	0.290436
	0.916667	40	10	41872	8128	0.289037	0.295438
	0.933333	39	11	41867	8133	0.179937	0.186947
	0.95	38	12	41890	8110	0.100706	0.107122
	0.966667	39	11	41922	8078	0.174215	0.181369
	0.983333	38	12	42002	7998	0.0928944	0.0992049
	1	37	13	42067	7933	0.0449736	0.0490919
	1.01667	37	13	42119	7881	0.0429598	0.0470935
	1.03333	37	13	42113	7887	0.0431887	0.0473013
	1.05	37	13	42114	7886	0.0431505	0.0472882
	1.06667	36	14	42128	7872	0.0196779	0.0220206
	1.08333	37	13	42114	7886	0.0431505	0.0472882
	1.1	37	13	42123	7877	0.0428076	0.0469554
	1.11667	37	13	42111	7889	0.0432653	0.0473707
	1.13333	37	13	42146	7854	0.0419403	0.0460602
	1.15	37	13	42204	7796	0.0398101	0.0438008
	1.16667	37	13	42229	7771	0.0389167	0.0428441
	1.18333	38	12	42237	7763	0.0778014	0.0836075
	1.2	37	13	42289	7711	0.0368326	0.0406118
	1.21667	37	13	42307	7693	0.0362237	0.0399527
	1.23333	37	13	42358	7642	0.0345389	0.038106
	1.25	36	14	42322	7678	0.0160596	0.0180501
	1.26667	38	12	42350	7650	0.0711611	0.0766089
	1.28333	39	11	42297	7703	0.137821	0.144947
	1.3	39	11	42273	7727	0.14001	0.147127
	1.31667	38	12	42283	7717	0.0750505	0.0807235
	1.33333	36	14	42329	7671	0.0159396	0.0179208
	1.35	36	14	42306	7694	0.0163366	0.0183557
	1.36667	35	15	42187	7813	0.00778243	0.00885485
	1.38333	36	14	42156	7844	0.0191198	0.0214227
	1.4	36	14	42180	7820	0.0186513	0.0209434
	1.41667	36	14	42259	7741	0.0171721	0.0192884
	1.43333	37	13	42277	7723	0.0372427	0.0410514
	1.45	37	13	42253	7747	0.038073	0.0419537
	1.46667	38	12	42294	7706	0.0744024	0.0800504
	1.48333	40	10	42316	7684	0.23144	0.239489
	1.5	39	11	42376	7624	0.130756	0.137758
	1.51667	40	10	42371	7629	0.22466	0.232541
	1.53333	39	11	42368	7632	0.131461	0.138461
	1.55	39	11	42403	7597	0.12839	0.135345
	1.56667	40	10	42429	7571	0.217605	0.225368
	1.58333	39	11	42445	7555	0.12476	0.131557
	1.6	39	11	42474	7526	0.12229	0.12899
	1.61667	39	11	42577	7423	0.113751	0.120301
	1.63333	39	11	42650	7350	0.107924	0.11444
	1.65	40	10	42675	7325	0.188824	0.195898
	1.66667	40	10	42639	7361	0.192916	0.200085
	1.68333	41	9	42644	7356	0.310995	0.316713
	1.7	41	9	42679	7321	0.305926	0.311639
	1.71667	39	11	42668	7332	0.106515	0.11308
	1.73333	39	11	42697	7303	0.10427	0.11073
	1.75	41	9	42719	7281	0.300162	0.305941
	1.76667	41	9	42745	7255	0.296433	0.302482
	1.78333	41	9	42725	7275	0.2993	0.305235
	1.8	41	9	42741	7259	0.297006	0.302981
	1.81667	37	13	42719	7281	0.0242258	0.0269425
	1.83333	35	15	42726	7274	0.00396837	0.00453672
	1.85	32	18	42740	7260	0.000137253	0.000162003
	1.86667	33	17	42680	7320	0.000501261	0.000583804
	1.88333	35	15	42612	7388	0.00460673	0.0052515
	1.9	37	13	42584	7416	0.0277638	0.0306876
	1.91667	39	11	42586	7414	0.113023	0.11958
	1.93333	39	11	42596	7404	0.112216	0.118852
	1.95	39	11	42609	7391	0.111174	0.117783
	1.96667	40	10	42629	7371	0.19406	0.201214
	1.98333	39	11	42592	7408	0.112538	0.119158
	2	36	14	42589	7411	0.0119583	0.0134573
	2.01667	38	12	42579	7421	0.0589013	0.063792
	2.03333	39	11	42554	7446	0.115626	0.122212
	2.05	38	12	42523	7477	0.0617537	0.0667006
	2.06667	37	13	42613	7387	0.0269728	0.0298592
	2.08333	38	12	42585	7415	0.0586012	0.0634861
	2.1	38	12	42560	7440	0.0598587	0.0647704
	2.11667	37	13	42560	7440	0.0284315	0.0313967
	2.13333	38	12	42568	7432	0.0594543	0.0643715
	2.15	39	11	42529	7471	0.117684	0.124205
	2.16667	38	12	42535	7465	0.0611346	0.0660915
	2.18333	39	11	42549	7451	0.116036	0.122537
	2.2	39	11	42553	7447	0.115708	0.122226
	2.21667	39	11	42560	7440	0.115135	0.121728
	2.23333	39	11	42642	7358	0.108553	0.115074
	2.25	39	11	42700	7300	0.10404	0.110517
	2.26667	39	11	42757	7243	0.0997189	0.106147
	2.28333	39	11	42780	7220	0.0980076	0.104356
	2.3	41	9	42796	7204	0.289158	0.295478
	2.31667	40	10	42827	7173	0.172022	0.179242
	2.33333	41	9	42863	7137	0.279686	0.286613
	2.35	41	9	42915	7085	0.272406	0.279869
	2.36667	41	9	42974	7026	0.264226	0.272086
	2.38333	40	10	42990	7010	0.154893	0.161956
	2.4	40	10	42930	7070	0.161089	0.168142
	2.41667	40	10	42849	7151	0.169656	0.176827
	2.43333	40	10	42820	7180	0.172779	0.179926
	2.45	39	11	42836	7164	0.0939183	0.100239
	2.46667	39	11	42822	7178	0.0949304	0.101229
	2.48333	39	11	42832	7168	0.0942068	0.100487
	2.5	40	10	42860	7140	0.168479	0.175702
	2.51667	39	11	42854	7146	0.0926272	0.0989489
	2.53333	40	10	42784	7216	0.176696	0.183686
	2.55	41	9	42767	7233	0.293288	0.299443
	2.56667	40	10	42729	7271	0.182766	0.189832
	2.58333	39	11	42746	7254	0.100544	0.106993
	2.6	39	11	42668	7332	0.106515	0.11308
	2.61667	39	11	42658	7342	0.107296	0.113809
	2.63333	39	11	42665	7335	0.106749	0.113262
	2.65	38	12	42684	7316	0.0538016	0.0584271
	2.66667	37	13	42785	7215	0.0226262	0.0252259
	2.68333	38	12	42771	7229	0.0498171	0.0542145
	2.7	38	12	42816	7184	0.0478401	0.0521103
	2.71667	39	11	42814	7186	0.0955117	0.101789
	2.73333	39	11	42838	7162	0.0937743	0.100115
	2.75	40	10	42804	7196	0.174514	0.181628
	2.76667	39	11	42793	7207	0.0970485	0.103365
	2.78333	41	9	42802	7198	0.288305	0.294858
	2.8	42	8	42767	7233	0.438607	0.443162
	2.81667	41	9	42793	7207	0.289584	0.295829
	2.83333	41	9	42838	7162	0.283208	0.290057
	2.85	43	7	42822	7178	0.589897	0.592035
	2.86667	44	6	42835	7165	0.740227	0.741256
	2.88333	42	8	42908	7092	0.415936	0.421082
	2.9	42	8	42940	7060	0.410792	0.416812
	2.91667	41	9	42931	7069	0.270179	0.277899
	2.93333	42	8	42932	7068	0.412078	0.417999
	2.95	41	9	43022	6978	0.257635	0.265679
	2.96667	40	10	43028	6972	0.151036	0.158107
	2.98333	40	10	43063	6937	0.14753	0.154662
	3	40	10	43085	6915	0.145349	0.152464
	3.01667	41	9	43123	6877	0.243969	0.252092
	3.03333	40	10	43095	6905	0.144364	0.151475
	3.05	41	9	43025	6975	0.257225	0.265333
	3.06667	41	9	43000	7000	0.260648	0.268556
	3.08333	42	8	42949	7051	0.409345	0.415579
	3.1	42	8	42878	7122	0.42076	0.425846
	3.11667	43	7	42868	7132	0.582687	0.584962
	3.13333	42	8	42850	7150	0.425263	0.42992
	3.15	41	9	42941	7059	0.268791	0.276549
	3.16667	41	9	42871	7129	0.278562	0.285623
	3.18333	41	9	42917	7083	0.272127	0.279663
	3.2	42	8	42862	7138	0.423333	0.42821
	3.21667	43	7	42879	7121	0.580954	0.583548
	3.23333	44	6	42969	7031	0.722753	0.72396
	3.25	42	8	42915	7085	0.41481	0.420298
	3.26667	41	9	42925	7075	0.271014	0.278598
	3.28333	41	9	42907	7093	0.273522	0.280775
	3.3	40	10	42914	7086	0.162763	0.16984
	3.31667	41	9	42959	7041	0.266297	0.274062
	3.33333	41	9	42973	7027	0.264363	0.27215
	3.35	41	9	42895	7105	0.275199	0.282335
	3.36667	41	9	42871	7129	0.278562	0.285623
	3.38333	41	9	42911	7089	0.272964	0.280362
	3.4	42	8	42941	7059	0.410631	0.416767
	3.41667	43	7	42904	7096	0.577006	0.579744
	3.43333	43	7	42933	7067	0.572406	0.575444
	3.45	42	8	42909	7091	0.415775	0.421038
	3.46667	41	9	42928	7072	0.270596	0.278248
	3.48333	41	9	43003	6997	0.260237	0.268208
	3.5	43	7	43100	6900	0.545538	0.548892
	3.51667	43	7	43089	6911	0.547327	0.550538
	3.53333	44	6	43095	6905	0.705641	0.707212
	3.55	44	6	43003	6997	0.7182	0.7196
	3.56667	43	7	42906	7094	0.576689	0.579587
	3.58333	42	8	42861	7139	0.423494	0.428252
	3.6	42	8	42828	7172	0.4288	0.433375
	3.61667	41	9	42790	7210	0.290011	0.296181
	3.63333	42	8	42865	7135	0.42285	0.427842
	3.65	40	10	42859	7141	0.168586	0.175763
	3.66667	39	11	42835	7165	0.0939904	0.100286
	3.68333	40	10	42793	7207	0.175713	0.182717
	3.7	41	9	42723	7277	0.299588	0.305442
	3.71667	40	10	42703	7297	0.18567	0.192682
	3.73333	41	9	42700	7300	0.302896	0.30864
	3.75	42	8	42747	7253	0.441821	0.446283
	3.76667	43	7	42715	7285	0.606452	0.60848
	3.78333	45	5	42630	7370	0.87822	0.878708
	3.8	45	5	42628	7372	0.878373	0.878708
	3.81667	45	5	42594	7406	0.880948	0.880948
	3.83333	44	6	42643	7357	0.763949	0.764799
	3.85	42	8	42626	7374	0.461232	0.465108
	3.86667	42	8	42575	7425	0.469391	0.472938
	3.88333	42	8	42585	7415	0.467793	0.471459
	3.9	42	8	42628	7372	0.460912	0.464915
	3.91667	42	8	42712	7288	0.447442	0.451835
	3.93333	41	9	42753	7247	0.295288	0.3014
	3.95	41	9	42801	7199	0.288447	0.294919
	3.96667	41	9	42840	7160	0.282926	0.28985
	3.98333	41	9	42879	7121	0.277439	0.284553
	4	40	10	42826	7174	0.17213	0.179303
	4.01667	40	10	42780	7220	0.177134	0.184089
	4.03333	40	10	42729	7271	0.182766	0.189832
	4.05	40	10	42803	7197	0.174623	0.181689
	4.06667	41	9	42822	7178	0.28547	0.292124
	4.08333	41	9	42817	7183	0.286178	0.292765
	4.1	41	9	42826	7174	0.284904	0.291628
	4.11667	41	9	42898	7102	0.274779	0.281985
	4.13333	41	9	42911	7089	0.272964	0.280362
	4.15	40	10	42876	7124	0.166775	0.173975
	4.16667	40	10	42991	7009	0.154791	0.161896
	4.18333	40	10	43043	6957	0.149528	0.156665
	4.2	41	9	43173	6827	0.23731	0.245352
	4.21667	42	8	43119	6881	0.382081	0.388667
	4.23333	43	7	43173	6827	0.533604	0.537186
	4.25	43	7	43190	6810	0.53081	0.534522
	4.26667	42	8	43195	6805	0.369949	0.376538
	4.28333	43	7	43148	6852	0.537703	0.541161
	4.3	41	9	43097	6903	0.24746	0.255626
	4.31667	42	8	43056	6944	0.392169	0.39859
	4.33333	41	9	43088	6912	0.248673	0.256805
	4.35	41	9	43049	6951	0.253955	0.262109
	4.36667	42	8	43070	6930	0.389925	0.396422
	4.38333	41	9	43018	6982	0.258182	0.266167
	4.4	41	9	43026	6974	0.257089	0.265268
	4.41667	40	10	43002	6998	0.153669	0.16077
	4.43333	40	10	43031	6969	0.150734	0.157882
	4.45	41	9	43070	6930	0.251106	0.259243
	4.46667	40	10	43137	6863	0.140265	0.147346
	4.48333	39	11	43113	6887	0.0752941	0.0809614
	4.5	41	9	43144	6856	0.241163	0.249264
	4.51667	40	10	43108	6892	0.143088	0.150224
	4.53333	40	10	43140	6860	0.139975	0.147127
	4.55	40	10	43214	6786	0.132922	0.139958
	4.56667	40	10	43144	6856	0.139588	0.146763
	4.58333	40	10	43099	6901	0.14397	0.151106
	4.6	40	10	43078	6922	0.146041	0.153145
	4.61667	38	12	43045	6955	0.038637	0.0425622
	4.63333	39	11	43049	6951	0.0793617	0.0851826
	4.65	39	11	43071	6929	0.0779476	0.0837396
	4.66667	39	11	43054	6946	0.0790389	0.0848613
	4.68333	39	11	43046	6954	0.0795559	0.0853655
	4.7	39	11	43009	6991	0.0819755	0.0878832
	4.71667	39	11	42929	7071	0.0873689	0.0934983
	4.73333	38	12	42951	7049	0.0422444	0.0463799
	4.75	38	12	42925	7075	0.0432836	0.0473764
	4.76667	38	12	42924	7076	0.0433239	0.0474061
	4.78333	38	12	42887	7113	0.0448352	0.0489705
	4.8	39	11	42971	7029	0.0845097	0.0905192
	4.81667	40	10	42980	7020	0.155917	0.162932
	4.83333	40	10	42986	7014	0.155302	0.162337
	4.85	39	11	43029	6971	0.0806617	0.0865263
	4.86667	39	11	43090	6910	0.0767397	0.0824912
	4.88333	40	10	43061	6939	0.147729	0.154825
	4.9	40	10	43116	6884	0.142306	0.149446
	4.91667	39	11	43144	6856	0.0733741	0.0789677
	4.93333	39	11	43214	6786	0.0691587	0.0744754
	4.95	39	11	43218	6782	0.0689228	0.0742436
	4.96667	38	12	43247	6753	0.0316499	0.0349294
	4.98333	39	11	43281	6719	0.0652785	0.070339
	5	39	11	43287	6713	0.0649384	0.0699934
	5.01667	39	11	43321	6679	0.0630333	0.0680012
	5.03333	41	9	43371	6629	0.211682	0.219297
	5.05	40	10	43346	6654	0.120852	0.127511
	5.06667	39	11	43341	6659	0.0619306	0.0668717
	5.08333	38	12	43356	6644	0.0282921	0.0312524
	5.1	39	11	43408	6592	0.0583322	0.0632137
	5.11667	39	11	43373	6627	0.0601936	0.0651133
	5.13333	38	12	43386	6614	0.0274164	0.0303129
	5.15	38	12	43372	6628	0.0278225	0.0307431
	5.16667	38	12	43393	6607	0.027215	0.0301088
	5.18333	39	11	43331	6669	0.0624803	0.0674248
	5.2	37	13	43349	6651	0.012032	0.013536
	5.21667	39	11	43354	6646	0.0612209	0.0661649
	5.23333	39	11	43319	6681	0.0631443	0.0681005
	5.25	39	11	43372	6628	0.0602474	0.0651519
	5.26667	40	10	43399	6601	0.116192	0.122667
	5.28333	40	10	43441	6559	0.112576	0.119164
	5.3	41	9	43471	6529	0.199221	0.206506
	5.31667	39	11	43473	6527	0.0549805	0.0596894
	5.33333	38	12	43491	6509	0.0245103	0.027242
	5.35	40	10	43436	6564	0.113003	0.11958
	5.36667	40	10	43405	6595	0.115672	0.122224
	5.38333	39	11	43458	6542	0.0557419	0.0604795
	5.4	39	11	43518	6482	0.0527396	0.0573083
	5.41667	38	12	43500	6500	0.0242724	0.026986
	5.43333	38	12	43453	6547	0.0255339	0.0283447
	5.45	38	12	43427	6573	0.0262525	0.0291155
	5.46667	39	11	43352	6648	0.0613297	0.0662626
	5.48333	39	11	43295	6705	0.0644867	0.0695274
	5.5	41	9	43202	6798	0.233481	0.241532
	5.51667	42	8	43105	6895	0.384321	0.390834
	5.53333	42	8	43040	6960	0.394734	0.401085
	5.55	43	7	42991	7009	0.563147	0.566293
	5.56667	42	8	43005	6995	0.40035	0.406676
	5.58333	42	8	42952	7048	0.408863	0.415207
	5.6	42	8	42911	7089	0.415454	0.420831
	5.61667	42	8	42925	7075	0.413203	0.418787
	5.63333	42	8	42926	7074	0.413042	0.418742
	5.65	43	7	42876	7124	0.581427	0.58386
	5.66667	42	8	42928	7072	0.412721	0.418534
	5.68333	40	10	43029	6971	0.150935	0.158047
	5.7	40	10	43012	6988	0.152654	0.159754
	5.71667	39	11	43019	6981	0.0813169	0.0872031
	5.73333	39	11	43003	6997	0.0823723	0.0882823
	5.75	41	9	42981	7019	0.263261	0.27117
	5.76667	40	10	42935	7065	0.160568	0.167646
	5.78333	40	10	42967	7033	0.157253	0.16428
	5.8	39	11	42918	7082	0.0881279	0.0942824
	5.81667	39	11	42941	7059	0.0865458	0.0926449
	5.83333	38	12	42897	7103	0.0444231	0.0485498
	5.85	38	12	42890	7110	0.0447113	0.04885
	5.86667	38	12	42851	7149	0.0463415	0.0505237
	5.88333	36	14	42827	7173	0.0090501	0.0102422
	5.9	36	14	42761	7239	0.00979233	0.0110683
	5.91667	37	13	42740	7260	0.0237078	0.0263827
	5.93333	36	14	42731	7269	0.0101455	0.0114495
	5.95	38	12	42702	7298	0.0529595	0.05753
	5.96667	39	11	42714	7286	0.102968	0.109411
	5.98333	39	11	42744	7256	0.100694	0.107122
	6	38	12	42712	7288	0.0524957	0.0570605
	6.01667	37	13	42688	7312	0.0250061	0.0277846
	6.03333	38	12	42777	7223	0.0495502	0.0539404
	6.05	37	13	42830	7170	0.0215828	0.0241149
	6.06667	36	14	42939	7061	0.0078948	0.00897986
	6.08333	37	13	42935	7065	0.0192917	0.0216019
	6.1	38	12	42949	7051	0.0423237	0.0464528
	6.11667	38	12	42962	7038	0.0418102	0.0459312
	6.13333	38	12	42922	7078	0.0434047	0.04748
	6.15	38	12	42843	7157	0.046681	0.0508785
	6.16667	38	12	42875	7125	0.0453333	0.0494546
	6.18333	38	12	42919	7081	0.043526	0.0475983
	6.2	38	12	42905	7095	0.0440953	0.0482063
	6.21667	37	13	42915	7085	0.0197129	0.022053
	6.23333	37	13	42961	7039	0.0187545	0.0210396
	6.25	37	13	42964	7036	0.0186933	0.020984
	6.26667	38	12	43019	6981	0.0396116	0.0435958
	6.28333	38	12	43045	6955	0.038637	0.0425622
	6.3	38	12	42981	7019	0.0410678	0.045157
	6.31667	38	12	43002	6998	0.0402583	0.0442805
	6.33333	37	13	42935	7065	0.0192917	0.0216019
	6.35	38	12	42942	7058	0.0426021	0.0467441
	6.36667	38	12	42972	7028	0.0414183	0.0455146
	6.38333	38	12	42981	7019	0.0410678	0.045157
	6.4	39	11	42983	7017	0.0837041	0.0896829
	6.41667	38	12	42935	7065	0.0428817	0.0470223
	6.43333	37	13	42963	7037	0.0187137	0.0210004
	6.45	37	13	42949	7051	0.019001	0.0213095
	6.46667	37	13	42949	7051	0.019001	0.0213095
	6.48333	36	14	42931	7069	0.00797314	0.00906324
	6.5	36	14	42892	7108	0.00836412	0.0094897
	6.51667	36	14	42880	7120	0.00848749	0.00962665
	6.53333	36	14	42836	7164	0.0089525	0.0101413
	6.55	37	13	42774	7226	0.0228871	0.0255009
	6.56667	38	12	42752	7248	0.0506689	0.0551248
	6.58333	37	13	42634	7366	0.0264107	0.029282
	6.6	37	13	42632	7368	0.0264639	0.0293229
	6.61667	38	12	42657	7343	0.0550823	0.0597819
	6.63333	38	12	42632	7368	0.056287	0.0610341
	6.65	37	13	42649	7351	0.0260147	0.0288607
	6.66667	37	13	42608	7392	0.027108	0.0299996
	6.68333	37	13	42621	7379	0.0267576	0.0296392
	6.7	36	14	42600	7400	0.0118093	0.0132937
	6.71667	36	14	42545	7455	0.0125696	0.0141364
	6.73333	37	13	42542	7458	0.0289401	0.0319486
	6.75	37	13	42600	7400	0.0273253	0.0302215
	6.76667	37	13	42659	7341	0.0257532	0.0285794
	6.78333	37	13	42668	7332	0.0255196	0.0283376
	6.8	37	13	42675	7325	0.0253389	0.0281457
	6.81667	36	14	42724	7276	0.0102294	0.0115405
	6.83333	36	14	42736	7264	0.0100859	0.0113858
	6.85	37	13	42735	7265	0.0238303	0.0265109
	6.86667	39	11	42733	7267	0.101524	0.107941
	6.88333	38	12	42746	7254	0.05094	0.0554031
	6.9	37	13	42744	7256	0.0236101	0.0262821
	6.91667	37	13	42787	7213	0.0225791	0.0251811
	6.93333	35	15	42891	7109	0.00317619	0.00364149
	6.95	36	14	42975	7025	0.00754994	0.00859304
	6.96667	35	15	43018	6982	0.0026608	0.00305741
	6.98333	35	15	43067	6933	0.00248173	0.00285256
	7	34	16	43005	6995	0.00092688	0.00107742
	7.01667	34	16	42972	7028	0.000975887	0.00113365
	7.03333	35	15	42975	7025	0.00282678	0.00324503
	7.05	35	15	42961	7039	0.00288266	0.00330813
	7.06667	35	15	42913	7087	0.00308136	0.00353389
	7.08333	35	15	42870	7130	0.00326898	0.0037443
	7.1	34	16	42908	7092	0.00107732	0.00125028
	7.11667	36	14	42893	7107	0.0083539	0.0094811
	7.13333	36	14	42849	7151	0.00881302	0.00998643
	7.15	37	13	42936	7064	0.0192708	0.0215852
	7.16667	36	14	42917	7083	0.00811175	0.00921499
	7.18333	36	14	42908	7092	0.00820188	0.00931444
	7.2	36	14	42834	7166	0.00897412	0.0101626
	7.21667	35	15	42882	7118	0.00321568	0.0036856
	7.23333	36	14	42921	7079	0.00807195	0.00917267
	7.25	36	14	42901	7099	0.00827255	0.00939173
	7.26667	36	14	42850	7150	0.00880237	0.0099775
	7.28333	36	14	42876	7124	0.00852894	0.00967061
	7.3	37	13	42868	7132	0.0207308	0.0231773
	7.31667	35	15	42876	7124	0.00324224	0.00371485
	7.33333	34	16	42785	7215	0.00129793	0.00150436
	7.35	35	15	42791	7209	0.00363863	0.00416505
	7.36667	36	14	42812	7188	0.00921467	0.0104219
	7.38333	35	15	42798	7202	0.00360453	0.00412733
	7.4	35	15	42718	7282	0.00401062	0.00458357
	7.41667	32	18	42691	7309	0.000149753	0.000176584
	7.43333	32	18	42648	7352	0.000161545	0.000190427
	7.45	32	18	42591	7409	0.000178446	0.000209936
	7.46667	32	18	42559	7441	0.000188606	0.000221672
	7.48333	32	18	42451	7549	0.00022679	0.000265683
	7.5	32	18	42336	7664	0.000274828	0.00032175
	7.51667	31	19	42410	7590	7.11245e-05	8.44208e-05
	7.53333	30	20	42463	7537	1.73108e-05	2.08494e-05
	7.55	30	20	42454	7546	1.76239e-05	2.12123e-05
	7.56667	31	19	42439	7561	6.74489e-05	8.01374e-05
	7.58333	31	19	42506	7494	5.9601e-05	7.08832e-05
	7.6	31	19	42523	7477	5.7745e-05	6.87441e-05
	7.61667	31	19	42521	7479	5.79606e-05	6.8978e-05
	7.63333	32	18	42502	7498	0.000207981	0.000244284
	7.65	32	18	42494	7506	0.000210837	0.000247396
	7.66667	32	18	42550	7450	0.000191554	0.000225064
	7.68333	31	19	42615	7385	4.85728e-05	5.80166e-05
	7.7	31	19	42609	7391	4.91284e-05	5.86608e-05
	7.71667	32	18	42606	7394	0.000173853	0.0002046
	7.73333	32	18	42628	7372	0.000167306	0.000196959
	7.75	32	18	42572	7428	0.000184418	0.000216821
	7.76667	33	17	42643	7357	0.00053198	0.000619181
	7.78333	33	17	42695	7305	0.000489256	0.000570007
	7.8	32	18	42641	7359	0.000163541	0.000192716
	7.81667	32	18	42632	7368	0.00016614	0.00019565
	7.83333	33	17	42594	7406	0.000575184	0.000669251
	7.85	34	16	42607	7393	0.0016852	0.00194446
	7.86667	34	16	42551	7449	0.00182582	0.00210334
	7.88333	34	16	42537	7463	0.00186249	0.00214491
	7.9	34	16	42560	7440	0.00180257	0.00207722
	7.91667	35	15	42569	7431	0.00486864	0.00554831
	7.93333	35	15	42631	7369	0.00449478	0.00512875
	7.95	35	15	42620	7380	0.00455932	0.00519909
	7.96667	35	15	42639	7361	0.00444833	0.00507736
	7.98333	36	14	42677	7323	0.0108069	0.0121844
	8	36	14	42689	7311	0.010657	0.0120192
	8.01667	34	16	42639	7361	0.00160908	0.00185783
	8.03333	34	16	42652	7348	0.00157901	0.00182486
	8.05	34	16	42598	7402	0.00170716	0.00196917
	8.06667	34	16	42585	7415	0.0017393	0.0020056
	8.08333	34	16	42526	7474	0.00189175	0.0021779
	8.1	34	16	42471	7529	0.00204397	0.00235239
	8.11667	32	18	42490	7510	0.000212278	0.000249006
	8.13333	33	17	42417	7583	0.00075779	0.000881151
	8.15	30	20	42416	7584	1.90035e-05	2.28576e-05
	8.16667	30	20	42359	7641	2.12574e-05	2.55429e-05
	8.18333	30	20	42340	7660	2.20609e-05	2.64907e-05
	8.2	31	19	42366	7634	7.70451e-05	9.13278e-05
	8.21667	34	16	42343	7657	0.00243902	0.00280437
	8.23333	34	16	42361	7639	0.00237984	0.00273719
	8.25	35	15	42361	7639	0.00631581	0.00719295
	8.26667	35	15	42351	7649	0.00639344	0.00727906
	8.28333	34	16	42267	7733	0.00270286	0.00310376
	8.3	33	17	42207	7793	0.00103805	0.00120548
	8.31667	33	17	42133	7867	0.00115621	0.00134096
	8.33333	33	17	42024	7976	0.00135133	0.00156575
	8.35	35	15	41979	8021	0.00988846	0.0111699
	8.36667	35	15	41974	8026	0.00994424	0.0112294
	8.38333	35	15	42008	7992	0.00956986	0.0108202
	8.4	34	16	42035	7965	0.00366213	0.00419061
	8.41667	34	16	42029	7971	0.00369031	0.00422151
	8.43333	33	17	41962	8038	0.00147449	0.00170516
	8.45	33	17	41907	8093	0.0015917	0.00183834
	8.46667	32	18	41999	8001	0.000471244	0.000549556
	8.48333	31	19	42023	7977	0.000140591	0.000165835
	8.5	31	19	42045	7955	0.000135423	0.000159896
	8.51667	31	19	42035	7965	0.000137751	0.000162538
	8.53333	32	18	42025	7975	0.000452593	0.00052849
	8.55	33	17	41983	8017	0.00143173	0.00165731
	8.56667	33	17	42064	7936	0.00127666	0.00148019
	8.58333	32	18	42135	7865	0.000380665	0.000445078
	8.6	32	18	42121	7879	0.000389221	0.000454934
	8.61667	32	18	42020	7980	0.000456128	0.000532273
	8.63333	32	18	41995	8005	0.000474173	0.000552792
	8.65	33	17	41957	8043	0.00148483	0.00171656
	8.66667	33	17	41912	8088	0.00158072	0.00182625
	8.68333	33	17	41975	8025	0.00144789	0.00167494
	8.7	33	17	41982	8018	0.00143374	0.00165911
	8.71667	33	17	42004	7996	0.00139005	0.0016101
	8.73333	32	18	42053	7947	0.000433235	0.000506049
	8.75	32	18	42077	7923	0.000417225	0.000487508
	8.76667	33	17	41990	8010	0.00141772	0.00164162
	8.78333	32	18	41950	8050	0.000508237	0.000591738
	8.8	31	19	41926	8074	0.000165537	0.000195004
	8.81667	32	18	41982	8018	0.000483801	0.000563835
	8.83333	32	18	42006	7994	0.000466157	0.0005438
	8.85	32	18	42025	7975	0.000452593	0.00052849
	8.86667	31	19	42087	7913	0.000126026	0.00014885
	8.88333	32	18	42197	7803	0.000344731	0.000403194
	8.9	33	17	42270	7730	0.000945836	0.0010991
	8.91667	31	19	42193	7807	0.000104848	0.000123958
	8.93333	31	19	42244	7756	9.58421e-05	0.000113385
	8.95	29	21	42255	7745	6.65192e-06	8.07925e-06
	8.96667	30	20	42259	7741	2.58049e-05	3.09556e-05
	8.98333	30	20	42265	7735	2.5509e-05	3.06108e-05
	9	30	20	42228	7772	2.73839e-05	3.28279e-05
	9.01667	30	20	42248	7752	2.63555e-05	3.16055e-05
	9.03333	30	20	42183	7817	2.98321e-05	3.57509e-05
	9.05	31	19	42185	7815	0.000106327	0.000125666
	9.06667	31	19	42201	7799	0.000103387	0.000122271
	9.08333	31	19	42262	7738	9.2833e-05	0.000109898
	9.1	34	16	42272	7728	0.00268479	0.00308399
	9.11667	34	16	42213	7787	0.00290465	0.00333229
	9.13333	35	15	42171	7829	0.00793019	0.00901727
	9.15	36	14	42158	7842	0.0190804	0.0213853
	9.16667	36	14	42080	7920	0.020664	0.0231098
	9.18333	35	15	42047	7953	0.00915455	0.0103571
	9.2	36	14	41955	8045	0.0234118	0.0260776
	9.21667	35	15	41984	8016	0.00983292	0.0111106
	9.23333	34	16	42010	7990	0.00378073	0.00432358
	9.25	34	16	41920	8080	0.0042347	0.00483659
	9.26667	35	15	41845	8155	0.0114738	0.0129201
	9.28333	35	15	41883	8117	0.0110048	0.0124037
	9.3	35	15	41851	8149	0.0113987	0.0128396
	9.31667	33	17	41870	8130	0.00167497	0.00193328
	9.33333	33	17	41830	8170	0.00176918	0.0020394
	9.35	34	16	41903	8097	0.00432537	0.00493858
	9.36667	34	16	41869	8131	0.00451159	0.0051463
	9.38333	34	16	41805	8195	0.00488028	0.00555981
	9.4	33	17	41711	8289	0.00207675	0.00238936
	9.41667	32	18	41753	8247	0.000683927	0.00079552
	9.43333	31	19	41756	8244	0.000218901	0.000256524
	9.45	30	20	41797	8203	6.0501e-05	7.19299e-05
	9.46667	30	20	41819	8181	5.81856e-05	6.92228e-05
	9.48333	28	22	41858	8142	3.68635e-06	4.48643e-06
	9.5	29	21	41862	8138	1.45904e-05	1.76083e-05
	9.51667	29	21	41824	8176	1.56982e-05	1.89261e-05
	9.53333	29	21	41849	8151	1.49611e-05	1.80435e-05
	9.55	29	21	41924	8076	1.29352e-05	1.56526e-05
	9.56667	29	21	41953	8047	1.22214e-05	1.47988e-05
	9.58333	30	20	41961	8039	4.50657e-05	5.38633e-05
	9.6	30	20	41994	8006	4.24285e-05	5.0745e-05
	9.61667	30	20	42045	7955	3.86263e-05	4.62437e-05
	9.63333	30	20	42039	7961	3.9057e-05	4.67438e-05
	9.65	28	22	42101	7899	2.20486e-06	2.69159e-06
	9.66667	28	22	42138	7862	2.03512e-06	2.49028e-06
	9.68333	28	22	42150	7850	1.9827e-06	2.42698e-06
	9.7	28	22	42098	7902	2.21918e-06	2.70816e-06
	9.71667	27	23	42154	7846	4.37139e-07	5.44345e-07
	9.73333	26	24	42137	7863	9.38918e-08	1.18392e-07
	9.75	27	23	42176	7824	4.15304e-07	5.17692e-07
	9.76667	26	24	42197	7803	8.09228e-08	1.02182e-07
	9.78333	25	25	42176	7824	1.62102e-08	2.07159e-08
	9.8	25	25	42155	7845	1.71288e-08	2.18743e-08
	9.81667	26	24	42171	7829	8.63222e-08	1.08886e-07
	9.83333	27	23	42202	7798	3.90807e-07	4.87324e-07
	9.85	29	21	42180	7820	7.75977e-06	9.41846e-06
	9.86667	28	22	42106	7894	2.18119e-06	2.66359e-06
	9.88333	30	20	42144	7856	3.21124e-05	3.84708e-05
	9.9	33	17	42144	7856	0.00113794	0.0013202
	9.91667	33	17	42197	7803	0.00105338	0.00122288
	9.93333	32	18	42225	7775	0.000329507	0.000385514
	9.95	31	19	42249	7751	9.49976e-05	0.000112423
	9.96667	31	19	42267	7733	9.20123e-05	0.000108962
	9.98333	30	20	42347	7653	2.17617e-05	2.61402e-05
	10	30	20	42367	7633	2.09271e-05	2.51544e-05
	10.0167	31	19	42392	7608	7.34954e-05	8.71486e-05
	10.0333	31	19	42402	7598	7.21696e-05	8.5633e-05
	10.05	30	20	42401	7599	1.95746e-05	2.35366e-05
	10.0667	28	22	42447	7553	1.02165e-06	1.26216e-06
	10.0833	29	21	42432	7568	4.58697e-06	5.57875e-06
	10.1	28	22	42459	7541	9.93925e-07	1.22833e-06
	10.1167	30	20	42469	7531	1.71049e-05	2.06083e-05
	10.1333	30	20	42457	7543	1.7519e-05	2.10931e-05
	10.15	31	19	42438	7562	6.75728e-05	8.0258e-05
	10.1667	31	19	42397	7603	7.28298e-05	8.63879e-05
	10.1833	31	19	42424	7576	6.93282e-05	8.23159e-05
	10.2	32	18	42417	7583	0.000240152	0.000281245
	10.2167	31	19	42443	7557	6.69556e-05	7.95775e-05
	10.2333	30	20	42491	7509	1.63687e-05	1.97279e-05
	10.25	30	20	42424	7576	1.87052e-05	2.25062e-05
	10.2667	29	21	42366	7634	5.27601e-06	6.41244e-06
	10.2833	29	21	42347	7653	5.49126e-06	6.6718e-06
	10.3	32	18	42298	7702	0.000292569	0.000342408
	10.3167	31	19	42321	7679	8.35539e-05	9.90106e-05
	10.3333	30	20	42302	7698	2.37512e-05	2.85109e-05
	10.35	31	19	42275	7725	9.07127e-05	0.000107458
	10.3667	31	19	42183	7817	0.0001067	0.000126065
	10.3833	29	21	42154	7846	8.1816e-06	9.91709e-06
	10.4	29	21	42151	7849	8.2316e-06	9.97434e-06
	10.4167	30	20	42121	7879	3.353e-05	4.01557e-05
	10.4333	30	20	42039	7961	3.9057e-05	4.67438e-05
	10.45	30	20	41993	8007	4.25063e-05	5.08212e-05
	10.4667	30	20	41957	8043	4.53952e-05	5.42392e-05
	10.4833	30	20	41875	8125	5.26481e-05	6.27801e-05
	10.5	29	21	41940	8060	1.25368e-05	1.51757e-05
	10.5167	28	22	41896	8104	3.40631e-06	4.15123e-06
	10.5333	28	22	41862	8138	3.65591e-06	4.45239e-06
	10.55	28	22	41861	8139	3.6635e-06	4.46012e-06
	10.5667	28	22	41917	8083	3.26009e-06	3.97437e-06
	10.5833	27	23	41962	8038	6.78337e-07	8.40046e-07
	10.6	26	24	41931	8069	1.54732e-07	1.9436e-07
	10.6167	28	22	41891	8109	3.44201e-06	4.19331e-06
	10.6333	29	21	41884	8116	1.39822e-05	1.68912e-05
	10.65	29	21	41888	8112	1.38741e-05	1.67719e-05
	10.6667	29	21	41876	8124	1.42006e-05	1.71494e-05
	10.6833	29	21	41887	8113	1.3901e-05	1.67988e-05
	10.7	30	20	41904	8096	4.99715e-05	5.96477e-05
	10.7167	30	20	41888	8112	5.14327e-05	6.13714e-05
	10.7333	30	20	41856	8144	5.44712e-05	6.49325e-05
	10.75	30	20	41885	8115	5.17109e-05	6.1683e-05
	10.7667	30	20	41855	8145	5.45687e-05	6.50272e-05
	10.7833	30	20	41836	8164	5.64515e-05	6.72487e-05
	10.8	30	20	41825	8175	5.75682e-05	6.85562e-05
	10.8167	31	19	41786	8214	0.000208498	0.000244812
	10.8333	31	19	41766	8234	0.000215383	0.000252484
	10.85	31	19	41780	8220	0.000210543	0.000247132
	10.8667	31	19	41767	8233	0.000215034	0.000252157
	10.8833	31	19	41864	8136	0.000183479	0.000215787
	10.9	29	21	41850	8150	1.49323e-05	1.80148e-05
	10.9167	29	21	41873	8127	1.42833e-05	1.72435e-05
	10.9333	29	21	41918	8082	1.30875e-05	1.58317e-05
	10.95	29	21	41889	8111	1.38472e-05	1.6745e-05
	10.9667	28	22	41958	8042	2.99112e-06	3.64771e-06
	10.9833	28	22	42018	7982	2.63419e-06	3.21351e-06
	11	28	22	42112	7888	2.15308e-06	2.63195e-06
	11.0167	29	21	42162	7838	8.04962e-06	9.76041e-06
	11.0333	29	21	42170	7830	7.9196e-06	9.60598e-06
	11.05	29	21	42180	7820	7.75977e-06	9.41846e-06
	11.0667	29	21	42145	7855	8.33244e-06	1.00931e-05
	11.0833	28	22	42213	7787	1.72739e-06	2.11878e-06
	11.1	28	22	42253	7747	1.58142e-06	1.94304e-06
	11.1167	28	22	42329	7671	1.33495e-06	1.64302e-06
	11.1333	29	21	42374	7626	5.18772e-06	6.30726e-06
	11.15	28	22	42471	7529	9.66901e-07	1.19534e-06
	11.1667	28	22	42497	7503	9.10664e-07	1.12621e-06
	11.1833	28	22	42574	7426	7.61363e-07	9.42541e-07
	11.2	28	22	42652	7348	6.3349e-07	7.84777e-07
	11.2167	28	22	42684	7316	5.87031e-07	7.28226e-07
	11.2333	29	21	42773	7227	2.16686e-06	2.64699e-06
	11.25	29	21	42822	7178	1.93802e-06	2.37309e-06
	11.2667	28	22	42797	7203	4.47034e-07	5.56474e-07
	11.2833	28	22	42774	7226	4.72734e-07	5.88262e-07
	11.3	28	22	42717	7283	5.42441e-07	6.73143e-07
	11.3167	29	21	42774	7226	2.16195e-06	2.64189e-06
	11.3333	29	21	42793	7207	2.07061e-06	2.53286e-06
	11.35	29	21	42848	7152	1.82584e-06	2.23724e-06
	11.3667	29	21	42828	7172	1.91158e-06	2.34151e-06
	11.3833	29	21	42870	7130	1.73561e-06	2.12813e-06
	11.4	29	21	42903	7097	1.60795e-06	1.97496e-06
	11.4167	29	21	42985	7015	1.32721e-06	1.63405e-06
	11.4333	28	22	43027	6973	2.52337e-07	3.1586e-07
	11.45	28	22	43067	6933	2.27888e-07	2.85753e-07
	11.4667	27	23	43034	6966	4.81197e-08	6.10397e-08
	11.4833	27	23	43057	6943	4.52117e-08	5.73915e-08
	11.5	27	23	43033	6967	4.825e-08	6.11835e-08
	11.5167	27	23	43018	6982	5.02446e-08	6.36903e-08
	11.5333	28	22	42980	7020	2.84169e-07	3.55334e-07
	11.55	29	21	42913	7087	1.571e-06	1.9309e-06
	11.5667	29	21	42786	7214	2.10384e-06	2.57263e-06
	11.5833	28	22	42721	7279	5.37254e-07	6.67167e-07
	11.6	28	22	42656	7344	6.27502e-07	7.77627e-07
	11.6167	27	23	42609	7391	1.45629e-07	1.83054e-07
	11.6333	28	22	42524	7476	8.55477e-07	1.05869e-06
	11.65	28	22	42503	7497	8.98123e-07	1.11108e-06
	11.6667	29	21	42446	7554	4.45186e-06	5.41626e-06
	11.6833	27	23	42384	7616	2.53448e-07	3.17141e-07
	11.7	26	24	42302	7698	6.2168e-08	7.86108e-08
	11.7167	26	24	42248	7752	7.12361e-08	8.99824e-08
	11.7333	27	23	42234	7766	3.62499e-07	4.52339e-07
	11.75	27	23	42176	7824	4.15304e-07	5.17692e-07
	11.7667	27	23	42160	7840	4.31081e-07	5.36986e-07
	11.7833	27	23	42114	7886	4.79594e-07	5.96592e-07
	11.8	27	23	42089	7911	5.08039e-07	6.31323e-07
	11.8167	26	24	42058	7942	1.1394e-07	1.43522e-07
	11.8333	26	24	42040	7960	1.19036e-07	1.49836e-07
	11.85	27	23	42105	7895	4.89659e-07	6.08692e-07
	11.8667	27	23	42066	7934	5.35585e-07	6.65324e-07
	11.8833	27	23	42019	7981	5.96239e-07	7.39393e-07
	11.9	27	23	42015	7985	6.01684e-07	7.4589e-07
	11.9167	27	23	42061	7939	5.41754e-07	6.72523e-07
	11.9333	26	24	42082	7918	1.07462e-07	1.35457e-07
	11.95	26	24	42077	7923	1.08783e-07	1.37073e-07
	11.9667	27	23	42111	7889	4.82927e-07	6.00531e-07
	11.9833	26	24	42175	7825	8.54702e-08	1.07887e-07
	12	27	23	42219	7781	3.75522e-07	4.68427e-07
	12.0167	27	23	42280	7720	3.25132e-07	4.06133e-07
	12.0333	27	23	42293	7707	3.1524e-07	3.93914e-07
	12.05	28	22	42310	7690	1.393e-06	1.71387e-06
	12.0667	28	22	42356	7644	1.2563e-06	1.54727e-06
	12.0833	28	22	42365	7635	1.23105e-06	1.51669e-06
	12.1	27	23	42352	7648	2.73763e-07	3.42441e-07
	12.1167	27	23	42388	7612	2.5101e-07	3.14308e-07
	12.1333	28	22	42422	7578	1.08171e-06	1.33544e-06
	12.15	28	22	42439	7561	1.04052e-06	1.28503e-06
	12.1667	28	22	42412	7588	1.10663e-06	1.36527e-06
	12.1833	28	22	42421	7579	1.08417e-06	1.33803e-06
	12.2	28	22	42387	7613	1.17128e-06	1.44355e-06
	12.2167	28	22	42403	7597	1.12952e-06	1.39255e-06
	12.2333	27	23	42406	7594	2.40306e-07	3.01219e-07
	12.25	25	25	42432	7568	8.15449e-09	1.04657e-08
	12.2667	27	23	42447	7553	2.17488e-07	2.72807e-07
	12.2833	27	23	42536	7464	1.74718e-07	2.19311e-07
	12.3	27	23	42575	7425	1.58565e-07	1.99105e-07
	12.3167	26	24	42553	7447	3.2485e-08	4.12508e-08
	12.3333	26	24	42558	7442	3.20588e-08	4.07239e-08
	12.35	27	23	42606	7394	1.4673e-07	1.84373e-07
	12.3667	27	23	42610	7390	1.45264e-07	1.82658e-07
	12.3833	27	23	42658	7342	1.28707e-07	1.61896e-07
	12.4	26	24	42696	7304	2.21673e-08	2.81987e-08
	12.4167	26	24	42707	7293	2.15169e-08	2.73907e-08
	12.4333	26	24	42717	7283	2.09411e-08	2.66672e-08
	12.45	27	23	42691	7309	1.18363e-07	1.49041e-07
	12.4667	26	24	42705	7295	2.16338e-08	2.75298e-08
	12.4833	25	25	42641	7359	4.55403e-09	5.85518e-09
	12.5	25	25	42499	7501	6.7801e-09	8.71105e-09
	12.5167	27	23	42469	7531	2.06092e-07	2.58603e-07
	12.5333	27	23	42402	7598	2.42647e-07	3.04048e-07
	12.55	28	22	42409	7591	1.11421e-06	1.37416e-06
	12.5667	27	23	42400	7600	2.43826e-07	3.05418e-07
	12.5833	28	22	42276	7724	1.50272e-06	1.84824e-06
	12.6	28	22	42270	7730	1.5229e-06	1.87241e-06
	12.6167	29	21	42239	7761	6.87532e-06	8.34777e-06
	12.6333	28	22	42215	7785	1.71981e-06	2.11019e-06
	12.65	28	22	42225	7775	1.68234e-06	2.06493e-06
	12.6667	28	22	42208	7792	1.74649e-06	2.14074e-06
	12.6833	28	22	42233	7767	1.65292e-06	2.0295e-06
	12.7	27	23	42266	7734	3.36107e-07	4.19552e-07
	12.7167	27	23	42300	7700	3.1003e-07	3.87538e-07
	12.7333	27	23	42267	7733	3.35312e-07	4.18704e-07
	12.75	26	24	42269	7731	6.75719e-08	8.53839e-08
	12.7667	26	24	42286	7714	6.47355e-08	8.18286e-08
	12.7833	26	24	42336	7664	5.70251e-08	7.21836e-08
	12.8	26	24	42317	7683	5.98478e-08	7.57035e-08
	12.8167	26	24	42332	7668	5.76088e-08	7.28969e-08
	12.8333	26	24	42340	7660	5.64469e-08	7.14769e-08
	12.85	26	24	42377	7623	5.13527e-08	6.50721e-08
	12.8667	26	24	42372	7628	5.2015e-08	6.58882e-08
	12.8833	25	25	42414	7586	8.5661e-09	1.099e-08
	12.9	25	25	42405	7595	8.77916e-09	1.12553e-08
	12.9167	26	24	42415	7585	4.65709e-08	5.90959e-08
	12.9333	25	25	42413	7587	8.58953e-09	1.10161e-08
	12.95	24	26	42405	7595	1.49351e-09	1.94032e-09
	12.9667	23	27	42386	7614	2.49131e-10	3.29369e-10
	12.9833	22	28	42414	7586	3.33035e-11	4.47695e-11
	13	22	28	42418	7582	3.28813e-11	4.42184e-11
	13.0167	23	27	42430	7570	2.18001e-10	2.88425e-10
	13.0333	23	27	42384	7616	2.50642e-10	3.31123e-10
	13.05	24	26	42392	7608	1.55042e-09	2.01353e-09
	13.0667	23	27	42434	7566	2.15362e-10	2.85038e-10
	13.0833	24	26	42422	7578	1.42205e-09	1.84882e-09
	13.1	23	27	42430	7570	2.18001e-10	2.88425e-10
	13.1167	23	27	42386	7614	2.49131e-10	3.29369e-10
	13.1333	22	28	42405	7595	3.42726e-11	4.60378e-11
	13.15	23	27	42438	7562	2.12753e-10	2.81688e-10
	13.1667	24	26	42457	7543	1.28498e-09	1.67183e-09
	13.1833	23	27	42461	7539	1.98323e-10	2.62777e-10
	13.2	22	28	42465	7535	2.82861e-11	3.81671e-11
	13.2167	22	28	42452	7548	2.94919e-11	3.97198e-11
	13.2333	22	28	42395	7605	3.53808e-11	4.7491e-11
	13.25	21	29	42439	7561	4.12081e-12	5.65571e-12
	13.2667	21	29	42421	7579	4.37696e-12	6.00268e-12
	13.2833	21	29	42402	7598	4.66379e-12	6.38146e-12
	13.3	21	29	42393	7607	4.80583e-12	6.57332e-12
	13.3167	21	29	42414	7586	4.48062e-12	6.13783e-12
	13.3333	20	30	42443	7557	5.03019e-13	6.98099e-13
	13.35	20	30	42443	7557	5.03019e-13	6.98099e-13
	13.3667	20	30	42442	7558	5.04788e-13	7.00014e-13
	13.3833	20	30	42439	7561	5.1013e-13	7.0715e-13
	13.4	20	30	42468	7532	4.60679e-13	6.40327e-13
	13.4167	20	30	42418	7582	5.49068e-13	7.60833e-13
	13.4333	20	30	42446	7554	4.97749e-13	6.91051e-13
	13.45	20	30	42402	7598	5.80627e-13	8.03636e-13
	13.4667	20	30	42354	7646	6.86055e-13	9.48463e-13
	13.4833	20	30	42388	7612	6.09658e-13	8.43493e-13
	13.5	20	30	42464	7536	4.67217e-13	6.49162e-13
	13.5167	20	30	42490	7510	4.2626e-13	5.92943e-13
	13.5333	21	29	42508	7492	3.26523e-12	4.49688e-12
	13.55	21	29	42533	7467	2.99936e-12	4.13546e-12
	13.5667	21	29	42493	7507	3.4354e-12	4.72761e-12
	13.5833	21	29	42507	7493	3.27632e-12	4.51043e-12
	13.6	22	28	42606	7394	1.78868e-11	2.41804e-11
	13.6167	22	28	42658	7342	1.50661e-11	2.03902e-11
	13.6333	22	28	42698	7302	1.31901e-11	1.78647e-11
	13.65	22	28	42783	7217	9.91485e-12	1.34845e-11
	13.6667	22	28	42779	7221	1.00498e-11	1.36629e-11
	13.6833	22	28	42793	7207	9.58497e-12	1.30457e-11
	13.7	22	28	42812	7188	8.98677e-12	1.22361e-11
	13.7167	22	28	42882	7118	7.07531e-12	9.6445e-12
	13.7333	22	28	42859	7141	7.65598e-12	1.04321e-11
	13.75	22	28	42904	7096	6.55932e-12	8.95131e-12
	13.7667	22	28	42896	7104	6.74266e-12	9.19454e-12
	13.7833	23	27	42869	7131	5.45979e-11	7.29593e-11
	13.8	22	28	42858	7142	7.68223e-12	1.04639e-11
	13.8167	23	27	42843	7157	5.94285e-11	7.93261e-11
	13.8333	23	27	42850	7150	5.80895e-11	7.75963e-11
	13.85	24	26	42881	7119	3.59124e-10	4.72014e-10
	13.8667	24	26	42905	7095	3.33219e-10	4.38766e-10
	13.8833	24	26	42871	7129	3.70471e-10	4.8675e-10
	13.9	24	26	42835	7165	4.14192e-10	5.43599e-10
	13.9167	24	26	42900	7100	3.38465e-10	4.45512e-10
	13.9333	24	26	42929	7071	3.09088e-10	4.07589e-10
	13.95	24	26	42946	7054	2.93006e-10	3.86665e-10
	13.9667	24	26	42906	7094	3.32179e-10	4.37557e-10
	13.9833	24	26	42860	7140	3.83344e-10	5.0348e-10
	14	24	26	42928	7072	3.1006e-10	4.0872e-10
	14.0167	25	25	42940	7060	1.9088e-09	2.47539e-09
	14.0333	25	25	42950	7050	1.85266e-09	2.40432e-09
	14.05	25	25	42933	7067	1.94905e-09	2.52576e-09
	14.0667	26	24	42898	7102	1.27135e-08	1.62762e-08
	14.0833	25	25	42925	7075	1.99602e-09	2.58571e-09
	14.1	25	25	42922	7078	2.01391e-09	2.607e-09
	14.1167	25	25	42957	7043	1.8143e-09	2.35538e-09
	14.1333	25	25	42916	7084	2.05014e-09	2.652e-09
	14.15	25	25	42912	7088	2.07464e-09	2.68176e-09
	14.1667	24	26	42898	7102	3.40586e-10	4.48139e-10
	14.1833	24	26	42892	7108	3.47023e-10	4.56276e-10
	14.2	25	25	42837	7163	2.58827e-09	3.33612e-09
	14.2167	25	25	42819	7181	2.72825e-09	3.51529e-09
	14.2333	25	25	42763	7237	3.21075e-09	4.13401e-09
	14.25	24	26	42784	7216	4.84551e-10	6.34552e-10
	14.2667	24	26	42768	7232	5.08859e-10	6.65417e-10
	14.2833	24	26	42739	7261	5.55884e-10	7.25854e-10
	14.3	24	26	42716	7284	5.9607e-10	7.77202e-10
	14.3167	24	26	42726	7274	5.78272e-10	7.54267e-10
	14.3333	26	24	42665	7335	2.4101e-08	3.06368e-08
	14.35	26	24	42663	7337	2.4231e-08	3.07912e-08
	14.3667	26	24	42678	7322	2.32716e-08	2.9593e-08
	14.3833	27	23	42687	7313	1.19575e-07	1.50461e-07
	14.4	25	25	42663	7337	4.27811e-09	5.50436e-09
	14.4167	25	25	42648	7352	4.46447e-09	5.74209e-09
	14.4333	24	26	42526	7474	1.05049e-09	1.36723e-09
	14.45	23	27	42505	7495	1.73266e-10	2.29745e-10
	14.4667	23	27	42448	7552	2.06361e-10	2.73326e-10
	14.4833	22	28	42393	7607	3.56065e-11	4.77761e-11
	14.5	22	28	42421	7579	3.25679e-11	4.38133e-11
	14.5167	21	29	42354	7646	5.47046e-12	7.47388e-12
	14.5333	21	29	42375	7625	5.1024e-12	6.97366e-12
	14.55	22	28	42317	7683	4.52726e-11	6.05653e-11
	14.5667	22	28	42332	7668	4.31862e-11	5.78172e-11
	14.5833	23	27	42297	7703	3.25438e-10	4.28835e-10
	14.6	24	26	42299	7701	2.02148e-09	2.61586e-09
	14.6167	24	26	42262	7738	2.24409e-09	2.89663e-09
	14.6333	24	26	42292	7708	2.06193e-09	2.66629e-09
	14.65	24	26	42244	7756	2.36056e-09	3.0448e-09
	14.6667	25	25	42253	7747	1.32229e-08	1.69223e-08
	14.6833	24	26	42238	7762	2.40064e-09	3.09538e-09
	14.7	23	27	42176	7824	4.65239e-10	6.10149e-10
	14.7167	23	27	42172	7828	4.70714e-10	6.17105e-10
	14.7333	22	28	42174	7826	7.06037e-11	9.40686e-11
	14.75	24	26	42142	7858	3.13603e-09	4.03925e-09
	14.7667	23	27	42153	7847	4.97567e-10	6.51123e-10
	14.7833	23	27	42166	7834	4.79042e-10	6.27566e-10
	14.8	23	27	42167	7833	4.77644e-10	6.25963e-10
	14.8167	23	27	42149	7851	5.03402e-10	6.5852e-10
	14.8333	22	28	42125	7875	8.20348e-11	1.09057e-10
	14.85	22	28	42151	7849	7.57666e-11	1.00873e-10
	14.8667	22	28	42150	7850	7.59991e-11	1.01145e-10
	14.8833	21	29	42180	7820	9.66044e-12	1.31435e-11
	14.9	23	27	42279	7721	3.43354e-10	4.51617e-10
	14.9167	23	27	42227	7773	4.00509e-10	5.25832e-10
	14.9333	24	26	42284	7716	2.10909e-09	2.72531e-09
	14.95	24	26	42314	7686	1.93732e-09	2.51147e-09
	14.9667	24	26	42278	7722	2.14513e-09	2.77088e-09
	14.9833	25	25	42274	7726	1.25029e-08	1.60122e-08
	15	25	25	42303	7697	1.1569e-08	1.48215e-08
	15.0167	25	25	42306	7694	1.14762e-08	1.47079e-08
	15.0333	23	27	42338	7662	2.87881e-10	3.80041e-10
	15.05	23	27	42326	7674	2.98425e-10	3.93672e-10
	15.0667	24	26	42270	7730	2.19408e-09	2.8331e-09
	15.0833	24	26	42303	7697	1.99871e-09	2.58825e-09
	15.1	24	26	42328	7672	1.86176e-09	2.41525e-09
	15.1167	24	26	42247	7753	2.34076e-09	3.02034e-09
	15.1333	25	25	42152	7848	1.72639e-08	2.2039e-08
	15.15	25	25	42132	7868	1.81908e-08	2.31976e-08
	15.1667	25	25	42128	7872	1.83817e-08	2.34328e-08
	15.1833	25	25	42151	7849	1.73092e-08	2.2089e-08
	15.2	26	24	42172	7828	8.61085e-08	1.08654e-07
	15.2167	25	25	42195	7805	1.54192e-08	1.9712e-08
	15.2333	25	25	42232	7768	1.39817e-08	1.78807e-08
	15.25	25	25	42245	7755	1.35073e-08	1.72801e-08
	15.2667	25	25	42123	7877	1.8623e-08	2.3732e-08
	15.2833	25	25	42147	7853	1.74914e-08	2.23136e-08
	15.3	25	25	42159	7841	1.69501e-08	2.16538e-08
	15.3167	25	25	42113	7887	1.91145e-08	2.43497e-08
	15.3333	24	26	42112	7888	3.40637e-09	4.38431e-09
	15.35	23	27	42106	7894	5.70363e-10	7.44221e-10
	15.3667	23	27	42081	7919	6.13084e-10	7.99096e-10
	15.3833	23	27	42110	7890	5.63795e-10	7.35917e-10
	15.4	23	27	42145	7855	5.09302e-10	6.65754e-10
	15.4167	23	27	42138	7862	5.19784e-10	6.7921e-10
	15.4333	22	28	42147	7853	7.67004e-11	1.0204e-10
	15.45	23	27	42126	7874	5.38232e-10	7.0306e-10
	15.4667	22	28	42123	7877	8.25368e-11	1.09683e-10
	15.4833	21	29	42112	7888	1.20164e-11	1.62934e-11
	15.5	22	28	42081	7919	9.37797e-11	1.24532e-10
	15.5167	22	28	42051	7949	1.02686e-10	1.36308e-10
	15.5333	22	28	42002	7998	1.18983e-10	1.57884e-10
	15.55	22	28	41993	8007	1.22232e-10	1.62135e-10
	15.5667	21	29	41997	8003	1.72941e-11	2.3388e-11
	15.5833	20	30	41902	8098	3.11877e-12	4.29682e-12
	15.6	21	29	41828	8172	2.92068e-11	3.93504e-11
	15.6167	20	30	41847	8153	3.72469e-12	5.1179e-12
	15.6333	19	31	41833	8167	4.86875e-13	6.76216e-13
	15.65	18	32	41793	8207	6.44365e-14	9.04725e-14
	15.6667	19	31	41797	8203	5.49172e-13	7.60833e-13
	15.6833	20	30	41792	8208	4.44215e-12	6.08745e-12
	15.7	22	28	41737	8263	2.59141e-10	3.42226e-10
	15.7167	23	27	41773	8227	1.46017e-09	1.89769e-09
	15.7333	23	27	41801	8199	1.35162e-09	1.75789e-09
	15.75	24	26	41792	8208	8.03847e-09	1.03204e-08
	15.7667	24	26	41830	8170	7.27515e-09	9.34376e-09
	15.7833	24	26	41891	8109	6.19098e-09	7.95699e-09
	15.8	23	27	41921	8079	9.67127e-10	1.25919e-09
	15.8167	23	27	41968	8032	8.46892e-10	1.10304e-09
	15.8333	23	27	42051	7949	6.68352e-10	8.70817e-10
	15.85	23	27	42155	7845	4.94673e-10	6.47572e-10
	15.8667	22	28	42144	7856	7.74079e-11	1.02944e-10
	15.8833	22	28	42236	7764	5.83002e-11	7.78489e-11
	15.9	22	28	42290	7710	4.92718e-11	6.58665e-11
	15.9167	22	28	42314	7686	4.57012e-11	6.1116e-11
	15.9333	22	28	42328	7672	4.37335e-11	5.85281e-11
	15.95	20	30	42413	7587	5.58749e-13	7.73653e-13
	15.9667	21	29	42403	7597	4.64825e-12	6.36263e-12
	15.9833	21	29	42472	7528	3.68791e-12	5.06929e-12
	16	21	29	42487	7513	3.50581e-12	4.82266e-12
	16.0167	21	29	42447	7553	4.01162e-12	5.50794e-12
	16.0333	21	29	42419	7581	4.40634e-12	6.04068e-12
	16.05	22	28	42444	7556	3.02582e-11	4.07212e-11
	16.0667	22	28	42487	7513	2.63515e-11	3.55835e-11
	16.0833	22	28	42457	7543	2.90225e-11	3.91314e-11
	16.1	22	28	42457	7543	2.90225e-11	3.91314e-11
	16.1167	22	28	42404	7596	3.43819e-11	4.61674e-11
	16.1333	21	29	42344	7656	5.65451e-12	7.72239e-12
	16.15	21	29	42326	7674	6.00077e-12	8.19218e-12
	16.1667	21	29	42298	7702	6.5799e-12	8.97599e-12
	16.1833	22	28	42220	7780	6.1264e-11	8.17458e-11
	16.2	23	27	42190	7810	4.46546e-10	5.85848e-10
	16.2167	22	28	42210	7790	6.31885e-11	8.42825e-11
	16.2333	22	28	42196	7804	6.59796e-11	8.79728e-11
	16.25	22	28	42179	7821	6.95265e-11	9.26677e-11
	16.2667	22	28	42164	7836	7.2806e-11	9.69669e-11
	16.2833	21	29	42167	7833	1.00737e-11	1.36902e-11
	16.3	21	29	42138	7862	1.10573e-11	1.50213e-11
	16.3167	22	28	42117	7883	8.40605e-11	1.11667e-10
	16.3333	21	29	42070	7930	1.37352e-11	1.8596e-11
	16.35	21	29	42136	7864	1.11284e-11	1.51121e-11
	16.3667	21	29	42123	7877	1.16013e-11	1.57366e-11
	16.3833	21	29	42124	7876	1.15643e-11	1.56922e-11
	16.4	21	29	42093	7907	1.27669e-11	1.7298e-11
	16.4167	21	29	42110	7890	1.20934e-11	1.63916e-11
	16.4333	21	29	42134	7866	1.12e-11	1.52036e-11
	16.45	21	29	42039	7961	1.51517e-11	2.04983e-11
	16.4667	21	29	41947	8053	2.02217e-11	2.73266e-11
	16.4833	21	29	41933	8067	2.11225e-11	2.85332e-11
	16.5	20	30	41943	8057	2.72965e-12	3.76503e-12
	16.5167	19	31	41944	8056	3.34583e-13	4.66138e-13
	16.5333	20	30	41912	8088	3.01925e-12	4.16129e-12
	16.55	22	28	41841	8159	1.91619e-10	2.53987e-10
	16.5667	21	29	41832	8168	2.8851e-11	3.89148e-11
	16.5833	21	29	41840	8160	2.81519e-11	3.80003e-11
	16.6	20	30	41804	8196	4.27516e-12	5.86531e-12
	16.6167	20	30	41855	8145	3.63005e-12	4.99166e-12
	16.6333	21	29	41822	8178	2.97482e-11	4.00499e-11
	16.65	21	29	41783	8217	3.35079e-11	4.50274e-11
	16.6667	21	29	41747	8253	3.73766e-11	5.01325e-11
	16.6833	21	29	41738	8262	3.84082e-11	5.14971e-11
	16.7	21	29	41726	8274	3.9826e-11	5.33583e-11
	16.7167	21	29	41711	8289	4.16685e-11	5.5806e-11
	16.7333	21	29	41731	8269	3.92293e-11	5.25784e-11
	16.75	20	30	41766	8234	4.82558e-12	6.59783e-12
	16.7667	19	31	41747	8253	6.4848e-13	8.96861e-13
	16.7833	19	31	41728	8272	6.90552e-13	9.54313e-13
	16.8	19	31	41697	8303	7.64861e-13	1.0566e-12
	16.8167	18	32	41656	8344	1.03302e-13	1.44479e-13
	16.8333	18	32	41663	8337	1.00863e-13	1.41122e-13
	16.85	18	32	41655	8345	1.03656e-13	1.44917e-13
	16.8667	17	33	41612	8388	1.31063e-14	1.87232e-14
	16.8833	16	34	41563	8437	1.57156e-15	2.3292e-15
	16.9	16	34	41563	8437	1.57156e-15	2.3292e-15
	16.9167	16	34	41611	8389	1.3182e-15	1.96095e-15
	16.9333	17	33	41658	8342	1.11344e-14	1.59316e-14
	16.95	17	33	41690	8310	9.93455e-15	1.42317e-14
	16.9667	17	33	41704	8296	9.44964e-15	1.35425e-14
	16.9833	18	32	41673	8327	9.74731e-14	1.36432e-13
	17	19	31	41652	8348	8.86491e-13	1.22368e-12
	17.0167	19	31	41652	8348	8.86491e-13	1.22368e-12
	17.0333	19	31	41678	8322	8.14127e-13	1.12423e-12
	17.05	18	32	41685	8315	9.35498e-14	1.30992e-13
	17.0667	18	32	41699	8301	8.91641e-14	1.24899e-13
	17.0833	18	32	41729	8271	8.04211e-14	1.12696e-13
	17.1	17	33	41764	8236	7.61737e-15	1.09734e-14
	17.1167	17	33	41746	8254	8.12772e-15	1.16759e-14
	17.1333	18	32	41735	8265	7.87742e-14	1.10431e-13
	17.15	20	30	41788	8212	4.49918e-12	6.16091e-12
	17.1667	20	30	41828	8172	3.95901e-12	5.43778e-12
	17.1833	19	31	41883	8117	4.11482e-13	5.72828e-13
	17.2	19	31	41861	8139	4.43163e-13	6.16218e-13
	17.2167	17	33	41940	8060	4.00611e-15	5.80595e-15
	17.2333	17	33	41929	8071	4.1722e-15	6.04423e-15
	17.25	19	31	42001	7999	2.75322e-13	3.83724e-13
	17.2667	19	31	42054	7946	2.29349e-13	3.20021e-13
	17.2833	18	32	42049	7951	2.60294e-14	3.67041e-14
	17.3	19	31	42040	7960	2.40721e-13	3.3576e-13
	17.3167	19	31	42067	7933	2.19251e-13	3.0605e-13
	17.3333	19	31	42070	7930	2.16982e-13	3.03118e-13
	17.35	19	31	42068	7932	2.18492e-13	3.05109e-13
	17.3667	18	32	42053	7947	2.56566e-14	3.61927e-14
	17.3833	18	32	42005	7995	3.04888e-14	4.29587e-14
	17.4	18	32	41987	8013	3.25171e-14	4.57808e-14
	17.4167	17	33	41927	8073	4.2031e-15	6.08655e-15
	17.4333	16	34	41903	8097	4.41317e-16	6.64189e-16
	17.45	15	35	41847	8153	4.84245e-17	7.63928e-17
	17.4667	15	35	41798	8202	5.86931e-17	9.22686e-17
	17.4833	15	35	41831	8169	5.15701e-17	8.12839e-17
	17.5	15	35	41783	8217	6.22365e-17	9.77536e-17
	17.5167	16	34	41695	8305	9.66459e-16	1.44188e-15
	17.5333	15	35	41678	8322	9.35033e-17	1.44842e-16
	17.55	15	35	41648	8352	1.04926e-16	1.62466e-16
	17.5667	15	35	41689	8311	8.96237e-17	1.39071e-16
	17.5833	16	34	41716	8284	8.93812e-16	1.33571e-15
	17.6	15	35	41710	8290	8.26442e-17	1.28629e-16
	17.6167	17	33	41705	8295	9.41589e-15	1.34995e-14
	17.6333	17	33	41763	8237	7.64489e-15	1.10086e-14
	17.65	17	33	41797	8203	6.76069e-15	9.75881e-15
	17.6667	17	33	41857	8143	5.43476e-15	7.86379e-15
	17.6833	17	33	41820	8180	6.21927e-15	8.98449e-15
	17.7	17	33	41835	8165	5.88891e-15	8.51409e-15
	17.7167	17	33	41825	8175	6.10721e-15	8.82616e-15
	17.7333	17	33	41845	8155	5.67812e-15	8.21263e-15
	17.75	16	34	41848	8152	5.44136e-16	8.15525e-16
	17.7667	16	34	41813	8187	6.21204e-16	9.30643e-16
	17.7833	14	36	41862	8138	3.6828e-18	6.10127e-18
	17.8	14	36	41912	8088	2.9995e-18	4.99917e-18
	17.8167	14	36	41892	8108	3.25666e-18	5.41773e-18
	17.8333	14	36	41908	8092	3.04931e-18	5.07983e-18
	17.85	14	36	41873	8127	3.52063e-18	5.83799e-18
	17.8667	14	36	41832	8168	4.16264e-18	6.86463e-18
	17.8833	14	36	41807	8193	4.6082e-18	7.58899e-18
	17.9	14	36	41807	8193	4.6082e-18	7.58899e-18
	17.9167	14	36	41842	8158	3.99634e-18	6.60855e-18
	17.9333	14	36	41877	8123	3.46339e-18	5.74837e-18
	17.95	13	37	41920	8080	2.10991e-19	3.72337e-19
	17.9667	13	37	41970	8030	1.70318e-19	3.01596e-19
	17.9833	13	37	41938	8062	1.95368e-19	3.45445e-19
	18	12	38	41988	8012	1.02639e-20	1.89585e-20
	18.0167	12	38	41967	8033	1.1269e-20	2.08043e-20
	18.0333	13	37	42001	7999	1.49033e-19	2.64686e-19
	18.05	13	37	41975	8025	1.66696e-19	2.95327e-19
	18.0667	13	37	41970	8030	1.70318e-19	3.01596e-19
	18.0833	13	37	41978	8022	1.64559e-19	2.91828e-19
	18.1	13	37	41981	8019	1.62448e-19	2.88228e-19
	18.1167	12	38	41956	8044	1.18329e-20	2.1823e-20
	18.1333	12	38	41904	8096	1.48909e-20	2.73367e-20
	18.15	12	38	41907	8093	1.46954e-20	2.69915e-20
	18.1667	13	37	41899	8101	2.30749e-19	4.07005e-19
	18.1833	13	37	41838	8162	2.9885e-19	5.24553e-19
	18.2	13	37	41861	8139	2.71152e-19	4.77567e-19
	18.2167	13	37	41863	8137	2.68865e-19	4.7377e-19
	18.2333	13	37	41821	8179	3.21064e-19	5.62721e-19
	18.25	13	37	41793	8207	3.61182e-19	6.31805e-19
	18.2667	13	37	41794	8206	3.59669e-19	6.29464e-19
	18.2833	13	37	41857	8143	2.75783e-19	4.84775e-19
	18.3	13	37	41847	8153	2.877e-19	5.05475e-19
	18.3167	13	37	41861	8139	2.71152e-19	4.77567e-19
	18.3333	14	36	41838	8162	4.06207e-18	6.71108e-18
	18.35	13	37	41783	8217	3.76654e-19	6.5791e-19
	18.3667	13	37	41763	8237	4.09547e-19	7.13634e-19
	18.3833	13	37	41778	8222	3.84628e-19	6.71189e-19
	18.4	12	38	41728	8272	3.20459e-20	5.77404e-20
	18.4167	12	38	41705	8295	3.53759e-20	6.36449e-20
	18.4333	12	38	41693	8307	3.72442e-20	6.69057e-20
	18.45	12	38	41652	8348	4.43772e-20	7.94026e-20
	18.4667	12	38	41721	8279	3.30258e-20	5.94762e-20
	18.4833	13	37	41723	8277	4.83882e-19	8.40722e-19
	18.5	13	37	41708	8292	5.14998e-19	8.93921e-19
	18.5167	13	37	41706	8294	5.1929e-19	9.00937e-19
	18.5333	14	36	41688	8312	7.44302e-18	1.20861e-17
	18.55	14	36	41685	8315	7.53279e-18	1.22208e-17
	18.5667	14	36	41674	8326	7.87101e-18	1.27408e-17
	18.5833	14	36	41692	8308	7.32492e-18	1.18997e-17
	18.6	15	35	41692	8308	8.85929e-17	1.3759e-16
	18.6167	15	35	41697	8303	8.69002e-17	1.35078e-16
	18.6333	13	37	41678	8322	5.83147e-19	1.00543e-18
	18.65	13	37	41651	8349	6.51889e-19	1.11699e-18
	18.6667	13	37	41643	8357	6.73722e-19	1.15166e-18
	18.6833	13	37	41703	8297	5.25794e-19	9.11342e-19
	18.7	13	37	41724	8276	4.81874e-19	8.37637e-19
	18.7167	13	37	41706	8294	5.1929e-19	9.00937e-19
	18.7333	13	37	41713	8287	5.04417e-19	8.75977e-19
	18.75	13	37	41693	8307	5.48048e-19	9.49e-19
	18.7667	13	37	41683	8317	5.71212e-19	9.87687e-19
	18.7833	13	37	41672	8328	5.97788e-19	1.0287e-18
	18.8	13	37	41658	8342	6.33349e-19	1.08781e-18
	18.8167	13	37	41652	8348	6.49209e-19	1.11293e-18
	18.8333	12	38	41649	8351	4.49483e-20	8.03844e-20
	18.85	13	37	41690	8310	5.549e-19	9.59942e-19
	18.8667	13	37	41678	8322	5.83147e-19	1.00543e-18
	18.8833	13	37	41658	8342	6.33349e-19	1.08781e-18
	18.9	14	36	41716	8284	6.65352e-18	1.08383e-17
	18.9167	14	36	41652	8348	8.59206e-18	1.3883e-17
	18.9333	13	37	41648	8352	6.59995e-19	1.13034e-18
	18.95	13	37	41680	8320	5.78345e-19	9.98581e-19
	18.9667	13	37	41670	8330	6.02748e-19	1.03674e-18
	18.9833	13	37	41679	8321	5.80741e-19	1.00176e-18
	19	11	39	41715	8285	2.06598e-21	3.93311e-21
	19.0167	11	39	41711	8289	2.10299e-21	4.00147e-21
	19.0333	12	38	41683	8317	3.88738e-20	6.97635e-20
	19.05	12	38	41677	8323	3.98845e-20	7.15417e-20
	19.0667	12	38	41663	8337	4.2343e-20	7.58383e-20
	19.0833	11	39	41686	8314	2.34935e-21	4.45845e-21
	19.1	11	39	41646	8354	2.80289e-21	5.28293e-21
	19.1167	11	39	41661	8339	2.62364e-21	4.95807e-21
	19.1333	11	39	41646	8354	2.80289e-21	5.28293e-21
	19.15	11	39	41635	8365	2.94183e-21	5.53033e-21
	19.1667	11	39	41622	8378	3.11467e-21	5.83697e-21
	19.1833	11	39	41597	8403	3.47519e-21	6.49906e-21
	19.2	11	39	41563	8437	4.03113e-21	7.51143e-21
	19.2167	11	39	41514	8486	4.98681e-21	9.24435e-21
	19.2333	11	39	41542	8458	4.41667e-21	8.20858e-21
	19.25	11	39	41528	8472	4.69334e-21	8.71379e-21
	19.2667	11	39	41524	8476	4.77544e-21	8.86163e-21
	19.2833	11	39	41511	8489	5.05198e-21	9.36033e-21
	19.3	10	40	41475	8525	3.32821e-22	6.60869e-22
	19.3167	13	37	41446	8554	1.50027e-18	2.52972e-18
	19.3333	12	38	41387	8613	1.34752e-19	2.39441e-19
	19.35	13	37	41368	8632	2.04848e-18	3.43641e-18
	19.3667	14	36	41381	8619	2.47848e-17	3.96734e-17
	19.3833	14	36	41392	8608	2.37587e-17	3.80816e-17
	19.4	14	36	41347	8653	2.82349e-17	4.50357e-17
	19.4167	14	36	41389	8611	2.40344e-17	3.85064e-17
	19.4333	14	36	41377	8623	2.51685e-17	4.02696e-17
	19.45	15	35	41342	8658	3.31416e-16	5.0025e-16
	19.4667	13	37	41363	8637	2.08957e-18	3.50045e-18
	19.4833	15	35	41380	8620	2.88018e-16	4.3584e-16
	19.5	16	34	41396	8604	2.87231e-15	4.16948e-15
	19.5167	16	34	41371	8629	3.14012e-15	4.5564e-15
	19.5333	15	35	41382	8618	2.85892e-16	4.3317e-16
	19.55	14	36	41360	8640	2.68642e-17	4.29255e-17
	19.5667	14	36	41338	8662	2.92232e-17	4.65708e-17
	19.5833	14	36	41284	8716	3.58936e-17	5.69238e-17
	19.6	14	36	41290	8710	3.50854e-17	5.57157e-17
	19.6167	13	37	41303	8697	2.64935e-18	4.42172e-18
	19.6333	13	37	41298	8702	2.70205e-18	4.50551e-18
	19.65	14	36	41301	8699	3.36491e-17	5.35056e-17
	19.6667	14	36	41349	8651	2.80197e-17	4.47123e-17
	19.6833	14	36	41372	8628	2.56562e-17	4.10317e-17
	19.7	14	36	41383	8617	2.45951e-17	3.93872e-17
	19.7167	13	37	41367	8633	2.05664e-18	3.44688e-18
	19.7333	13	37	41353	8647	2.17416e-18	3.63876e-18
	19.75	13	37	41336	8664	2.32563e-18	3.88865e-18
	19.7667	13	37	41332	8668	2.36273e-18	3.94885e-18
	19.7833	14	36	41322	8678	3.10633e-17	4.94813e-17
	19.8	15	35	41350	8650	3.21785e-16	4.8612e-16
	19.8167	15	35	41382	8618	2.85892e-16	4.3317e-16
	19.8333	15	35	41466	8534	2.09103e-16	3.18836e-16
	19.85	15	35	41443	8557	2.27878e-16	3.46583e-16
	19.8667	14	36	41484	8516	1.66423e-17	2.67227e-17
	19.8833	14	36	41503	8497	1.54545e-17	2.48265e-17
	19.9	14	36	41530	8470	1.39066e-17	2.23698e-17
	19.9167	14	36	41548	8452	1.29591e-17	2.08737e-17
	19.9333	15	35	41539	8461	1.58891e-16	2.44238e-16
	19.95	15	35	41580	8420	1.36024e-16	2.09625e-16
	19.9667	16	34	41602	8398	1.36249e-15	2.02267e-15
	19.9833	16	34	41550	8450	1.64788e-15	2.4393e-15
	20	16	34	41509	8491	1.91271e-15	2.80936e-15
	20.0167	16	34	41517	8483	1.85801e-15	2.73125e-15
	20.0333	16	34	41481	8519	2.11664e-15	3.09501e-15
	20.05	15	35	41495	8505	1.87551e-16	2.87312e-16
	20.0667	15	35	41423	8577	2.45518e-16	3.72781e-16
	20.0833	15	35	41454	8546	2.18704e-16	3.33052e-16
	20.1	15	35	41468	8532	2.07543e-16	3.16591e-16
	20.1167	15	35	41459	8541	2.14653e-16	3.27022e-16
	20.1333	15	35	41494	8506	1.88257e-16	2.88271e-16
	20.15	15	35	41470	8530	2.05994e-16	3.14629e-16
	20.1667	15	35	41444	8556	2.27029e-16	3.45437e-16
	20.1833	15	35	41439	8561	2.31305e-16	3.51647e-16
	20.2	15	35	41481	8519	1.97673e-16	3.02047e-16
	20.2167	16	34	41490	8510	2.04891e-15	2.99962e-15
	20.2333	16	34	41470	8530	2.20236e-15	3.21383e-15
	20.25	16	34	41461	8539	2.27498e-15	3.31844e-15
	20.2667	15	35	41445	8555	2.26183e-16	3.44296e-16
	20.2833	15	35	41439	8561	2.31305e-16	3.51647e-16
	20.3	15	35	41424	8576	2.44606e-16	3.71553e-16
	20.3167	16	34	41445	8555	2.4098e-15	3.51084e-15
	20.3333	16	34	41424	8576	2.59848e-15	3.77961e-15
	20.35	16	34	41417	8583	2.66448e-15	3.87091e-15
	20.3667	17	33	41431	8569	2.46547e-14	3.48066e-14
	20.3833	16	34	41439	8561	2.46232e-15	3.583e-15
	20.4	16	34	41418	8582	2.65495e-15	3.85863e-15
	20.4167	16	34	41411	8589	2.72233e-15	3.95337e-15
	20.4333	16	34	41442	8558	2.43592e-15	3.54602e-15
	20.45	16	34	41488	8512	2.06378e-15	3.02016e-15
	20.4667	15	35	41501	8499	1.83367e-16	2.81023e-16
	20.4833	16	34	41501	8499	1.96896e-15	2.88727e-15
	20.5	16	34	41528	8472	1.78525e-15	2.63074e-15
	20.5167	16	34	41459	8541	2.29142e-15	3.34108e-15
	20.5333	16	34	41526	8474	1.79827e-15	2.64884e-15
	20.55	15	35	41502	8498	1.82679e-16	2.80087e-16
	20.5667	15	35	41536	8464	1.60702e-16	2.46918e-16
	20.5833	16	34	41512	8488	1.89201e-15	2.7801e-15
	20.6	15	35	41555	8445	1.49557e-16	2.30284e-16
	20.6167	15	35	41591	8409	1.30451e-16	2.01296e-16
	20.6333	16	34	41551	8449	1.64189e-15	2.43143e-15
	20.65	16	34	41607	8393	1.33771e-15	1.98752e-15
	20.6667	15	35	41587	8413	1.32451e-16	2.04208e-16
	20.6833	15	35	41591	8409	1.30451e-16	2.01296e-16
	20.7	15	35	41514	8486	1.7461e-16	2.67944e-16
	20.7167	16	34	41531	8469	1.76589e-15	2.60541e-15
	20.7333	16	34	41541	8459	1.7028e-15	2.51852e-15
	20.75	15	35	41518	8482	1.71998e-16	2.64048e-16
	20.7667	16	34	41531	8469	1.76589e-15	2.60541e-15
	20.7833	16	34	41518	8482	1.85128e-15	2.72246e-15
	20.8	15	35	41485	8515	1.94728e-16	2.97674e-16
	20.8167	16	34	41474	8526	2.17081e-15	3.17164e-15
	20.8333	16	34	41448	8552	2.38395e-15	3.47458e-15
	20.85	16	34	41474	8526	2.17081e-15	3.17164e-15
	20.8667	16	34	41491	8509	2.04151e-15	2.99123e-15
	20.8833	17	33	41495	8505	1.97525e-14	2.79847e-14
	20.9	16	34	41472	8528	2.18653e-15	3.19202e-15
	20.9167	15	35	41469	8531	2.06767e-16	3.15542e-16
	20.9333	13	37	41488	8512	1.267e-18	2.14141e-18
	20.95	13	37	41446	8554	1.50027e-18	2.52972e-18
	20.9667	13	37	41414	8586	1.70539e-18	2.8662e-18
	20.9833	14	36	41439	8561	1.98182e-17	3.17798e-17
	21	13	37	41410	8590	1.73286e-18	2.91101e-18
	21.0167	13	37	41418	8582	1.67833e-18	2.82469e-18
	21.0333	13	37	41432	8568	1.58688e-18	2.67202e-18
	21.05	13	37	41418	8582	1.67833e-18	2.82469e-18
	21.0667	13	37	41379	8621	1.96082e-18	3.29088e-18
	21.0833	13	37	41358	8642	2.13146e-18	3.56896e-18
	21.1	13	37	41368	8632	2.04848e-18	3.43641e-18
	21.1167	13	37	41344	8656	2.25312e-18	3.76916e-18
	21.1333	14	36	41364	8636	2.64555e-17	4.22913e-17
	21.15	14	36	41339	8661	2.91117e-17	4.64137e-17
	21.1667	15	35	41369	8631	2.99981e-16	4.53372e-16
	21.1833	15	35	41379	8621	2.89086e-16	4.37273e-16
	21.2	15	35	41405	8595	2.62515e-16	3.98253e-16
	21.2167	15	35	41402	8598	2.65456e-16	4.02545e-16
	21.2333	15	35	41393	8607	2.74472e-16	4.16041e-16
	21.25	15	35	41463	8537	2.11465e-16	3.223e-16
	21.2667	15	35	41491	8509	1.90391e-16	2.91414e-16
	21.2833	15	35	41488	8512	1.92548e-16	2.94465e-16
	21.3	15	35	41489	8511	1.91826e-16	2.93486e-16
	21.3167	16	34	41542	8458	1.69661e-15	2.5104e-15
	21.3333	16	34	41566	8434	1.55444e-15	2.30477e-15
	21.35	15	35	41613	8387	1.19959e-16	1.85424e-16
	21.3667	14	36	41698	8302	7.15118e-18	1.16279e-17
	21.3833	14	36	41679	8321	7.71549e-18	1.25003e-17
	21.4	14	36	41683	8317	7.59322e-18	1.23133e-17
	21.4167	16	34	41678	8322	1.0294e-15	1.53515e-15
	21.4333	16	34	41703	8297	9.38137e-16	1.40078e-15
	21.45	17	33	41756	8244	7.84026e-15	1.12719e-14
	21.4667	17	33	41761	8239	7.70023e-15	1.10795e-14
	21.4833	17	33	41763	8237	7.64489e-15	1.10086e-14
	21.5	17	33	41820	8180	6.21927e-15	8.98449e-15
	21.5167	16	34	41794	8206	6.67343e-16	9.99349e-16
	21.5333	15	35	41828	8172	5.21815e-17	8.21756e-17
	21.55	14	36	41785	8215	5.03818e-18	8.26307e-18
	21.5667	14	36	41804	8196	4.66467e-18	7.66446e-18
	21.5833	14	36	41807	8193	4.6082e-18	7.58899e-18
	21.6	14	36	41754	8246	5.71048e-18	9.33593e-18
	21.6167	15	35	41724	8276	7.8286e-17	1.22216e-16
	21.6333	15	35	41734	8266	7.53098e-17	1.17723e-16
	21.65	15	35	41696	8304	8.72362e-17	1.35542e-16
	21.6667	15	35	41706	8294	8.39319e-17	1.30577e-16
	21.6833	15	35	41685	8315	9.10161e-17	1.4111e-16
	21.7	15	35	41719	8281	7.98164e-17	1.24443e-16
	21.7167	15	35	41743	8257	7.27249e-17	1.13781e-16
	21.7333	14	36	41770	8230	5.35333e-18	8.75999e-18
	21.75	15	35	41724	8276	7.8286e-17	1.22216e-16
	21.7667	14	36	41747	8253	5.87388e-18	9.59001e-18
	21.7833	13	37	41758	8242	4.18195e-19	7.28351e-19
	21.8	12	38	41753	8247	2.87712e-20	5.2127e-20
	21.8167	12	38	41717	8283	3.35987e-20	6.04777e-20
	21.8333	13	37	41751	8249	4.306e-19	7.49594e-19
	21.85	12	38	41758	8242	2.81564e-20	5.10903e-20
	21.8667	12	38	41771	8229	2.66169e-20	4.83944e-20
	21.8833	13	37	41804	8196	3.44873e-19	6.04158e-19
	21.9	14	36	41773	8227	5.28881e-18	8.66229e-18
	21.9167	15	35	41777	8223	6.37109e-17	9.99387e-17
	21.9333	15	35	41756	8244	6.91417e-17	1.08316e-16
	21.95	13	37	41749	8251	4.34209e-19	7.55512e-19
	21.9667	14	36	41765	8235	5.46255e-18	8.93466e-18
	21.9833	13	37	41728	8272	4.73921e-19	8.2421e-19
	22	14	36	41728	8272	6.34053e-18	1.03331e-17
	22.0167	14	36	41711	8289	6.78829e-18	1.10429e-17
	22.0333	14	36	41661	8339	8.28968e-18	1.34125e-17
	22.05	14	36	41681	8319	7.65412e-18	1.24065e-17
	22.0667	14	36	41751	8249	5.77996e-18	9.44524e-18
	22.0833	13	37	41800	8200	3.50719e-19	6.141e-19
	22.1	14	36	41806	8194	4.62695e-18	7.60595e-18
	22.1167	14	36	41801	8199	4.72181e-18	7.7548e-18
	22.1333	14	36	41833	8167	4.14571e-18	6.83985e-18
	22.15	15	35	41811	8189	5.57804e-17	8.77664e-17
	22.1667	15	35	41816	8184	5.46978e-17	8.61005e-17
	22.1833	14	36	41875	8125	3.4919e-18	5.79301e-18
	22.2	14	36	41893	8107	3.24331e-18	5.39802e-18
	22.2167	14	36	41865	8135	3.63787e-18	6.02961e-18
	22.2333	15	35	41859	8141	4.61877e-17	7.296e-17
	22.25	15	35	41907	8093	3.81977e-17	6.04713e-17
	22.2667	16	34	41888	8112	4.67331e-16	7.01874e-16
	22.2833	16	34	41954	8046	3.62905e-16	5.47551e-16
	22.3	16	34	42010	7990	2.9229e-16	4.41934e-16
	22.3167	16	34	41984	8016	3.23249e-16	4.88128e-16
	22.3333	16	34	42014	7986	2.87789e-16	4.35677e-16
	22.35	15	35	41992	8008	2.72041e-17	4.34493e-17
	22.3667	16	34	41941	8059	3.81509e-16	5.7514e-16
	22.3833	16	34	41945	8055	3.75689e-16	5.66603e-16
	22.4	16	34	41923	8077	4.08794e-16	6.16015e-16
	22.4167	16	34	41884	8116	4.74514e-16	7.12365e-16
	22.4333	16	34	41892	8108	4.60253e-16	6.91821e-16
	22.45	15	35	41938	8062	3.37658e-17	5.36675e-17
	22.4667	15	35	41897	8103	3.97436e-17	6.28633e-17
	22.4833	13	37	41859	8141	2.73458e-19	4.81158e-19
	22.5	13	37	41858	8142	2.74618e-19	4.82963e-19
	22.5167	14	36	41881	8119	3.40706e-18	5.65747e-18
	22.5333	13	37	41791	8209	3.64226e-19	6.36511e-19
	22.55	13	37	41782	8218	3.78236e-19	6.60353e-19
	22.5667	15	35	41728	8272	7.70822e-17	1.20389e-16
	22.5833	15	35	41691	8309	8.89352e-17	1.38062e-16
	22.6	14	36	41634	8366	9.22914e-18	1.49057e-17
	22.6167	14	36	41660	8340	8.32276e-18	1.346e-17
	22.6333	15	35	41624	8376	1.15024e-16	1.77948e-16
	22.65	15	35	41606	8394	1.23206e-16	1.90361e-16
	22.6667	16	34	41574	8426	1.50965e-15	2.24021e-15
	22.6833	16	34	41532	8468	1.75948e-15	2.59808e-15
	22.7	16	34	41568	8432	1.54313e-15	2.28894e-15
	22.7167	14	36	41562	8438	1.22656e-17	1.97655e-17
	22.7333	13	37	41532	8468	1.06039e-18	1.79474e-18
	22.75	13	37	41560	8440	9.4633e-19	1.60622e-18
	22.7667	13	37	41572	8428	9.01168e-19	1.53173e-18
	22.7833	13	37	41533	8467	1.0561e-18	1.78832e-18
	22.8	13	37	41553	8447	9.73678e-19	1.65108e-18
	22.8167	13	37	41574	8426	8.93847e-19	1.52e-18
	22.8333	13	37	41648	8352	6.59995e-19	1.13034e-18
	22.85	13	37	41675	8325	5.90424e-19	1.01651e-18
	22.8667	14	36	41677	8323	7.77734e-18	1.25949e-17
	22.8833	14	36	41716	8284	6.65352e-18	1.08383e-17
	22.9	14	36	41771	8229	5.33174e-18	8.72863e-18
	22.9167	14	36	41790	8210	4.93718e-18	8.10111e-18
	22.9333	15	35	41805	8195	5.7107e-17	8.98143e-17
	22.95	15	35	41783	8217	6.22365e-17	9.77536e-17
	22.9667	16	34	41768	8232	7.35863e-16	1.10104e-15
	22.9833	16	34	41770	8230	7.3036e-16	1.09326e-15
	23	17	33	41744	8256	8.18641e-15	1.17555e-14
	23.0167	17	33	41759	8241	7.75595e-15	1.11552e-14
	23.0333	17	33	41738	8262	8.36495e-15	1.20071e-14
	23.05	15	35	41715	8285	8.10615e-17	1.2633e-16
	23.0667	15	35	41712	8288	8.20076e-17	1.27749e-16
	23.0833	14	36	41713	8287	6.73407e-18	1.09596e-17
	23.1	15	35	41712	8288	8.20076e-17	1.27749e-16
	23.1167	15	35	41729	8271	7.6784e-17	1.19975e-16
	23.1333	15	35	41702	8298	8.52388e-17	1.32553e-16
	23.15	15	35	41679	8321	9.3144e-17	1.44347e-16
	23.1667	15	35	41631	8369	1.11985e-16	1.73322e-16
	23.1833	16	34	41611	8389	1.3182e-15	1.96095e-15
	23.2	16	34	41617	8383	1.28944e-15	1.91977e-15
	23.2167	16	34	41603	8397	1.3575e-15	2.01609e-15
	23.2333	16	34	41611	8389	1.3182e-15	1.96095e-15
	23.25	16	34	41632	8368	1.22018e-15	1.81739e-15
	23.2667	16	34	41655	8345	1.12089e-15	1.67089e-15
	23.2833	16	34	41651	8349	1.13758e-15	1.69506e-15
	23.3	16	34	41698	8302	9.55743e-16	1.42648e-15
	23.3167	17	33	41747	8253	8.09852e-15	1.16386e-14
	23.3333	17	33	41732	8268	8.54724e-15	1.2259e-14
	23.35	17	33	41779	8221	7.21576e-15	1.04073e-14
	23.3667	17	33	41772	8228	7.40057e-15	1.06654e-14
	23.3833	18	32	41791	8209	6.48862e-14	9.10684e-14
	23.4	18	32	41753	8247	7.40254e-14	1.03855e-13
	23.4167	18	32	41739	8261	7.76943e-14	1.0896e-13
	23.4333	15	35	41749	8251	7.10494e-17	1.11256e-16
	23.45	15	35	41722	8278	7.88948e-17	1.23059e-16
	23.4667	16	34	41720	8280	8.80585e-16	1.31649e-15
	23.4833	15	35	41686	8314	9.06661e-17	1.40628e-16
	23.5	15	35	41617	8383	1.18141e-16	1.82692e-16
	23.5167	15	35	41546	8454	1.5474e-16	2.38163e-16
	23.5333	15	35	41470	8530	2.05994e-16	3.14629e-16
	23.55	15	35	41414	8586	2.53879e-16	3.85314e-16
	23.5667	14	36	41352	8648	2.76999e-17	4.42215e-17
	23.5833	16	34	41365	8635	3.20789e-15	4.65286e-15
	23.6	16	34	41332	8668	3.60655e-15	5.22899e-15
	23.6167	17	33	41345	8655	3.31127e-14	4.66011e-14
	23.6333	17	33	41302	8698	3.83266e-14	5.39178e-14
	23.65	18	32	41284	8716	3.56309e-13	4.96213e-13
	23.6667	18	32	41235	8765	4.17527e-13	5.8102e-13
	23.6833	17	33	41253	8747	4.52307e-14	6.35313e-14
	23.7	17	33	41276	8724	4.1853e-14	5.88098e-14
	23.7167	17	33	41291	8709	3.97822e-14	5.59437e-14
	23.7333	17	33	41286	8714	4.04612e-14	5.68764e-14
	23.75	17	33	41367	8633	3.07159e-14	4.32619e-14
	23.7667	18	32	41368	8632	2.70857e-13	3.77647e-13
	23.7833	17	33	41384	8616	2.89791e-14	4.08476e-14
	23.8	17	33	41420	8580	2.56074e-14	3.61374e-14
	23.8167	16	34	41445	8555	2.4098e-15	3.51084e-15
	23.8333	17	33	41503	8497	1.92102e-14	2.72377e-14
	23.85	17	33	41455	8545	2.2693e-14	3.20749e-14
	23.8667	17	33	41435	8565	2.43168e-14	3.43565e-14
	23.8833	17	33	41469	8531	2.16189e-14	3.05808e-14
	23.9	17	33	41475	8525	2.11737e-14	2.99746e-14
	23.9167	17	33	41472	8528	2.13952e-14	3.02763e-14
	23.9333	17	33	41500	8500	1.94119e-14	2.75129e-14
	23.95	18	32	41514	8486	1.66937e-13	2.33297e-13
	23.9667	17	33	41508	8492	1.88785e-14	2.67885e-14
	23.9833	17	33	41508	8492	1.88785e-14	2.67885e-14
	24	17	33	41481	8519	2.07374e-14	2.93684e-14
	24.0167	17	33	41461	8539	2.22265e-14	3.14279e-14
	24.0333	17	33	41433	8567	2.44852e-14	3.45809e-14
	24.05	16	34	41419	8581	2.64546e-15	3.84639e-15
	24.0667	16	34	41496	8504	2.00492e-15	2.93881e-15
	24.0833	16	34	41476	8524	2.1552e-15	3.15011e-15
	24.1	16	34	41523	8477	1.81797e-15	2.67677e-15
	24.1167	16	34	41504	8496	1.94768e-15	2.85839e-15
	24.1333	16	34	41507	8493	1.92662e-15	2.82865e-15
	24.15	16	34	41530	8470	1.77232e-15	2.61276e-15
	24.1667	16	34	41491	8509	2.04151e-15	2.99123e-15
	24.1833	16	34	41534	8466	1.74673e-15	2.58031e-15
	24.2	16	34	41535	8465	1.74039e-15	2.572e-15
	24.2167	17	33	41571	8429	1.51434e-14	2.1565e-14
	24.2333	17	33	41594	8406	1.39659e-14	1.99275e-14
	24.25	17	33	41559	8441	1.57951e-14	2.24753e-14
	24.2667	17	33	41535	8465	1.71804e-14	2.43982e-14
	24.2833	17	33	41549	8451	1.63587e-14	2.32588e-14
	24.3	17	33	41561	8439	1.56846e-14	2.23269e-14
	24.3167	17	33	41607	8393	1.33398e-14	1.90493e-14
	24.3333	17	33	41581	8419	1.46201e-14	2.08363e-14
	24.35	16	34	41617	8383	1.28944e-15	1.91977e-15
	24.3667	17	33	41604	8396	1.34818e-14	1.92445e-14
	24.3833	17	33	41656	8344	1.12139e-14	1.60389e-14
	24.4	17	33	41677	8323	1.04062e-14	1.48955e-14
	24.4167	16	34	41712	8288	9.07231e-16	1.3552e-15
	24.4333	15	35	41786	8214	6.15116e-17	9.66573e-17
	24.45	14	36	41837	8163	4.07867e-18	6.73541e-18
	24.4667	14	36	41857	8143	3.75887e-18	6.22444e-18
	24.4833	14	36	41842	8158	3.99634e-18	6.60855e-18
	24.5	14	36	41891	8109	3.27006e-18	5.43752e-18
	24.5167	15	35	41878	8122	4.28488e-17	6.77452e-17
	24.5333	14	36	41900	8100	3.15133e-18	5.24737e-18
	24.55	15	35	41916	8084	3.68562e-17	5.8399e-17
	24.5667	16	34	41907	8093	4.34619e-16	6.54382e-16
	24.5833	16	34	41890	8110	4.63779e-16	6.9683e-16
	24.6	16	34	41859	8141	5.2188e-16	7.82494e-16
	24.6167	15	35	41854	8146	4.71073e-17	7.438e-17
	24.6333	15	35	41870	8130	4.42253e-17	6.98907e-17
	24.65	16	34	41867	8133	5.06248e-16	7.59372e-16
	24.6667	15	35	41852	8148	4.74801e-17	7.49357e-17
	24.6833	15	35	41901	8099	3.91181e-17	6.19012e-17
	24.7	14	36	41886	8114	3.33788e-18	5.54772e-18
	24.7167	13	37	41923	8077	2.08306e-19	3.67779e-19
	24.7333	13	37	41925	8075	2.06534e-19	3.6483e-19
	24.75	13	37	41934	8066	1.9874e-19	3.51235e-19
	24.7667	14	36	41940	8060	2.67223e-18	4.45785e-18
	24.7833	15	35	41957	8043	3.12995e-17	4.98355e-17
	24.8	15	35	41931	8069	3.47209e-17	5.51612e-17
	24.8167	15	35	41957	8043	3.12995e-17	4.98355e-17
	24.8333	15	35	41950	8050	3.21872e-17	5.12036e-17
	24.85	15	35	41924	8076	3.57021e-17	5.6645e-17
	24.8667	14	36	41882	8118	3.39311e-18	5.63692e-18
	24.8833	14	36	41848	8152	3.89966e-18	6.45164e-18
	24.9	14	36	41816	8184	4.44273e-18	7.32318e-18
	24.9167	14	36	41751	8249	5.77996e-18	9.44524e-18
	24.9333	15	35	41780	8220	6.29695e-17	9.88188e-17
	24.95	15	35	41767	8233	6.62435e-17	1.03821e-16
	24.9667	15	35	41749	8251	7.10494e-17	1.11256e-16
	24.9833	15	35	41773	8227	6.47125e-17	1.01466e-16
	25	15	35	41831	8169	5.15701e-17	8.12839e-17
	25.0167	15	35	41915	8085	3.7003e-17	5.86057e-17
	25.0333	16	34	41899	8101	4.48114e-16	6.74137e-16
	25.05	15	35	41917	8083	3.671e-17	5.81929e-17
	25.0667	14	36	41953	8047	2.53229e-18	4.22832e-18
	25.0833	14	36	41961	8039	2.44973e-18	4.09236e-18
	25.1	15	35	41926	8074	3.5419e-17	5.62207e-17
	25.1167	16	34	41917	8083	4.183e-16	6.30076e-16
	25.1333	16	34	41896	8104	4.53278e-16	6.81621e-16
	25.15	17	33	41894	8106	4.74593e-15	6.86986e-15
	25.1667	16	34	41882	8118	4.78146e-16	7.17518e-16
	25.1833	15	35	41837	8163	5.03681e-17	7.9424e-17
	25.2	14	36	41775	8225	5.24622e-18	8.59644e-18
	25.2167	14	36	41696	8304	7.20864e-18	1.17161e-17
	25.2333	13	37	41667	8333	6.10261e-19	1.04916e-18
	25.25	14	36	41657	8343	8.42278e-18	1.36156e-17
	25.2667	14	36	41588	8412	1.10717e-17	1.78576e-17
	25.2833	15	35	41592	8408	1.29955e-16	2.00617e-16
	25.3	15	35	41541	8459	1.57694e-16	2.42502e-16
	25.3167	16	34	41539	8461	1.71524e-15	2.53588e-15
	25.3333	15	35	41545	8455	1.55326e-16	2.38964e-16
	25.35	15	35	41530	8470	1.64385e-16	2.52469e-16
	25.3667	15	35	41506	8494	1.7995e-16	2.76021e-16
	25.3833	14	36	41514	8486	1.48047e-17	2.37933e-17
	25.4	14	36	41523	8477	1.42928e-17	2.29809e-17
	25.4167	14	36	41547	8453	1.301e-17	2.09464e-17
	25.4333	14	36	41575	8425	1.16539e-17	1.87882e-17
	25.45	14	36	41622	8378	9.67899e-18	1.56253e-17
	25.4667	14	36	41687	8313	7.47283e-18	1.2129e-17
	25.4833	14	36	41735	8265	6.16458e-18	1.00509e-17
	25.5	14	36	41797	8203	4.79905e-18	7.87806e-18
	25.5167	13	37	41842	8158	2.93843e-19	5.16018e-19
	25.5333	13	37	41878	8122	2.52295e-19	4.4479e-19
	25.55	14	36	41834	8166	4.12885e-18	6.81516e-18
	25.5667	13	37	41825	8175	3.15697e-19	5.53585e-19
	25.5833	14	36	41855	8145	3.78973e-18	6.27265e-18
	25.6	14	36	41807	8193	4.6082e-18	7.58899e-18
	25.6167	14	36	41814	8186	4.479e-18	7.37958e-18
	25.6333	14	36	41743	8257	5.96928e-18	9.74134e-18
	25.65	14	36	41742	8258	5.99336e-18	9.77621e-18
	25.6667	14	36	41784	8216	5.05862e-18	8.29282e-18
	25.6833	15	35	41737	8263	7.44385e-17	1.16411e-16
	25.7	16	34	41725	8275	8.64316e-16	1.2927e-15
	25.7167	17	33	41773	8227	7.37389e-15	1.06312e-14
	25.7333	17	33	41789	8211	6.95942e-15	1.00417e-14
	25.75	17	33	41736	8264	8.42529e-15	1.20889e-14
	25.7667	17	33	41685	8315	1.01135e-14	1.44823e-14
	25.7833	17	33	41645	8355	1.16607e-14	1.66714e-14
	25.8	17	33	41644	8356	1.17022e-14	1.6724e-14
	25.8167	17	33	41579	8421	1.47234e-14	2.09751e-14
	25.8333	17	33	41538	8462	1.7001e-14	2.41625e-14
	25.85	17	33	41558	8442	1.58506e-14	2.25453e-14
	25.8667	17	33	41582	8418	1.45688e-14	2.07713e-14
	25.8833	17	33	41586	8414	1.43651e-14	2.0489e-14
	25.9	17	33	41538	8462	1.7001e-14	2.41625e-14
	25.9167	17	33	41518	8482	1.82315e-14	2.58807e-14
	25.9333	16	34	41502	8498	1.96184e-15	2.878e-15
	25.95	16	34	41488	8512	2.06378e-15	3.02016e-15
	25.9667	16	34	41520	8480	1.83789e-15	2.70498e-15
	25.9833	16	34	41519	8481	1.84457e-15	2.71371e-15
	26	16	34	41532	8468	1.75948e-15	2.59808e-15
	26.0167	15	35	41562	8438	1.45642e-16	2.24352e-16
	26.0333	15	35	41600	8400	1.26056e-16	1.94681e-16
	26.05	13	37	41555	8445	9.65787e-19	1.63847e-18
	26.0667	13	37	41565	8435	9.27252e-19	1.57458e-18
	26.0833	12	38	41560	8440	6.55349e-20	1.16795e-19
	26.1	13	37	41628	8372	7.16582e-19	1.22318e-18
	26.1167	13	37	41642	8358	6.765e-19	1.15586e-18
	26.1333	13	37	41680	8320	5.78345e-19	9.98581e-19
	26.15	13	37	41693	8307	5.48048e-19	9.49e-19
	26.1667	13	37	41683	8317	5.71212e-19	9.87687e-19
	26.1833	13	37	41645	8355	6.68198e-19	1.14276e-18
	26.2	13	37	41678	8322	5.83147e-19	1.00543e-18
	26.2167	13	37	41657	8343	6.35966e-19	1.09127e-18
	26.2333	12	38	41675	8325	4.02271e-20	7.21202e-20
	26.25	11	39	41668	8332	2.54386e-21	4.81234e-21
	26.2667	11	39	41672	8328	2.49933e-21	4.73059e-21
	26.2833	11	39	41695	8305	2.2576e-21	4.2911e-21
	26.3	12	38	41758	8242	2.81564e-20	5.10903e-20
	26.3167	11	39	41803	8197	1.3946e-21	2.6891e-21
	26.3333	11	39	41821	8179	1.28617e-21	2.48936e-21
	26.35	11	39	41833	8167	1.21848e-21	2.35961e-21
	26.3667	10	40	41819	8181	6.96978e-23	1.44952e-22
	26.3833	11	39	41872	8128	1.02153e-21	1.98677e-21
	26.4	11	39	41818	8182	1.30365e-21	2.52049e-21
	26.4167	10	40	41789	8211	8.00987e-23	1.65912e-22
	26.4333	10	40	41773	8227	8.62475e-23	1.78341e-22
	26.45	10	40	41728	8272	1.06105e-22	2.18898e-22
	26.4667	10	40	41727	8273	1.06593e-22	2.19779e-22
	26.4833	10	40	41712	8288	1.14184e-22	2.35296e-22
	26.5	10	40	41712	8288	1.14184e-22	2.35296e-22
	26.5167	10	40	41761	8239	9.11578e-23	1.8817e-22
	26.5333	10	40	41772	8228	8.66467e-23	1.79063e-22
	26.55	10	40	41788	8212	8.04701e-23	1.66586e-22
	26.5667	11	39	41756	8244	1.72126e-21	3.29779e-21
	26.5833	11	39	41744	8256	1.81591e-21	3.47358e-21
	26.6	11	39	41722	8278	2.00272e-21	3.8147e-21
	26.6167	12	38	41687	8313	3.82138e-20	6.86133e-20
	26.6333	11	39	41684	8316	2.37023e-21	4.49333e-21
	26.65	11	39	41640	8360	2.87786e-21	5.41291e-21
	26.6667	11	39	41578	8422	3.77597e-21	7.05056e-21
	26.6833	10	40	41597	8403	1.92655e-22	3.92506e-22
	26.7	11	39	41597	8403	3.47519e-21	6.49906e-21
	26.7167	10	40	41631	8369	1.65181e-22	3.3787e-22
	26.7333	10	40	41623	8377	1.7128e-22	3.4975e-22
	26.75	10	40	41627	8373	1.68204e-22	3.43858e-22
	26.7667	10	40	41641	8359	1.57853e-22	3.23064e-22
	26.7833	10	40	41585	8415	2.03374e-22	4.13876e-22
	26.8	10	40	41582	8418	2.06143e-22	4.19274e-22
	26.8167	10	40	41566	8434	2.21542e-22	4.48313e-22
	26.8333	9	41	41541	8459	1.22898e-23	2.6863e-23
	26.85	10	40	41553	8447	2.34871e-22	4.73955e-22
	26.8667	11	39	41559	8441	4.10196e-21	7.63945e-21
	26.8833	11	39	41545	8455	4.35948e-21	8.10648e-21
	26.9	10	40	41481	8519	3.24055e-22	6.44529e-22
	26.9167	10	40	41512	8488	2.82219e-22	5.65065e-22
	26.9333	11	39	41522	8478	4.817e-21	8.93416e-21
	26.95	12	38	41508	8492	8.15256e-20	1.45149e-19
	26.9667	12	38	41538	8462	7.18896e-20	1.28057e-19
	26.9833	12	38	41495	8505	8.60799e-20	1.53182e-19
	27	13	37	41480	8520	1.30854e-18	2.21058e-18
	27.0167	14	36	41479	8521	1.69693e-17	2.72356e-17
	27.0333	13	37	41471	8529	1.35685e-18	2.29111e-18
	27.05	13	37	41469	8531	1.36781e-18	2.30746e-18
	27.0667	14	36	41460	8540	1.82693e-17	2.93091e-17
	27.0833	13	37	41406	8594	1.76077e-18	2.95651e-18
	27.1	13	37	41417	8583	1.68506e-18	2.83335e-18
	27.1167	13	37	41434	8566	1.57422e-18	2.65194e-18
	27.1333	13	37	41471	8529	1.35685e-18	2.29111e-18
	27.15	13	37	41495	8505	1.23171e-18	2.08273e-18
	27.1667	13	37	41532	8468	1.06039e-18	1.79474e-18
	27.1833	14	36	41590	8410	1.09847e-17	1.77252e-17
	27.2	14	36	41537	8463	1.35304e-17	2.17744e-17
	27.2167	13	37	41629	8371	7.13644e-19	1.21875e-18
	27.2333	12	38	41632	8368	4.83212e-20	8.63306e-20
	27.25	11	39	41649	8351	2.76611e-21	5.21908e-21
	27.2667	10	40	41579	8421	2.08949e-22	4.2474e-22
	27.2833	10	40	41529	8471	2.61557e-22	5.24863e-22
	27.3	10	40	41509	8491	2.86026e-22	5.7237e-22
	27.3167	8	42	41509	8491	6.23669e-25	1.4713e-24
	27.3333	9	41	41486	8514	1.58357e-23	3.44253e-23
	27.35	9	41	41440	8560	1.95496e-23	4.23968e-23
	27.3667	9	41	41422	8578	2.12228e-23	4.59148e-23
	27.3833	8	42	41392	8608	1.0825e-24	2.54042e-24
	27.4	8	42	41343	8657	1.36054e-24	3.13369e-24
	27.4167	9	41	41381	8619	2.55709e-23	5.46646e-23
	27.4333	9	41	41405	8595	2.29305e-23	4.93424e-23
	27.45	9	41	41384	8616	2.52253e-23	5.399e-23
	27.4667	9	41	41385	8615	2.51111e-23	5.38096e-23
	27.4833	10	40	41378	8622	5.11012e-22	1.00637e-21
	27.5	10	40	41359	8641	5.55452e-22	1.08912e-21
	27.5167	10	40	41406	8594	4.51758e-22	8.92606e-22
	27.5333	10	40	41402	8598	4.59794e-22	9.07489e-22
	27.55	10	40	41434	8566	3.99204e-22	7.90069e-22
	27.5667	10	40	41478	8522	3.28409e-22	6.52469e-22
	27.5833	10	40	41474	8526	3.34304e-22	6.63449e-22
	27.6	10	40	41487	8513	3.15513e-22	6.28929e-22
	27.6167	10	40	41513	8487	2.8096e-22	5.62859e-22
	27.6333	10	40	41505	8495	2.9118e-22	5.8236e-22
	27.65	10	40	41487	8513	3.15513e-22	6.28929e-22
	27.6667	10	40	41455	8545	3.63739e-22	7.21466e-22
	27.6833	10	40	41453	8547	3.6698e-22	7.27494e-22
	27.7	10	40	41496	8504	3.03109e-22	6.0521e-22
	27.7167	10	40	41487	8513	3.15513e-22	6.28929e-22
	27.7333	9	41	41431	8569	2.03695e-23	4.41217e-23
	27.75	9	41	41409	8591	2.25171e-23	4.85107e-23
	27.7667	9	41	41375	8625	2.62758e-23	5.6105e-23
	27.7833	9	41	41358	8642	2.83775e-23	6.0485e-23
	27.8	10	40	41360	8640	5.53022e-22	1.08495e-21
	27.8167	10	40	41344	8656	5.93169e-22	1.16118e-21
	27.8333	10	40	41366	8634	5.38659e-22	1.05966e-21
	27.85	10	40	41365	8635	5.41027e-22	1.06373e-21
	27.8667	9	41	41411	8589	2.23131e-23	4.81e-23
	27.8833	9	41	41403	8597	2.314e-23	4.97635e-23
	27.9	8	42	41457	8543	7.97646e-25	1.87559e-24
	27.9167	8	42	41486	8514	6.95507e-25	1.6397e-24
	27.9333	9	41	41494	8506	1.5264e-23	3.32228e-23
	27.95	10	40	41536	8464	2.53483e-22	5.09513e-22
	27.9667	10	40	41522	8478	2.6988e-22	5.41263e-22
	27.9833	9	41	41523	8477	1.33554e-23	2.91391e-23
	28	9	41	41567	8433	1.08953e-23	2.39166e-23
	28.0167	9	41	41586	8414	9.97494e-24	2.19497e-23
	28.0333	9	41	41576	8424	1.04495e-23	2.29659e-23
	28.05	9	41	41551	8449	1.17341e-23	2.5695e-23
	28.0667	9	41	41577	8423	1.04011e-23	2.28735e-23
	28.0833	9	41	41549	8451	1.18432e-23	2.59183e-23
	28.1	9	41	41552	8448	1.16799e-23	2.55919e-23
	28.1167	9	41	41593	8407	9.6553e-24	2.12594e-23
	28.1333	9	41	41601	8399	9.30219e-24	2.05195e-23
	28.15	9	41	41629	8371	8.16255e-24	1.8061e-23
	28.1667	9	41	41630	8370	8.12447e-24	1.79878e-23
	28.1833	10	40	41681	8319	1.31574e-22	2.70512e-22
	28.2	11	39	41664	8336	2.58916e-21	4.89546e-21
	28.2167	11	39	41641	8359	2.86523e-21	5.39197e-21
	28.2333	9	41	41635	8365	7.93665e-24	1.75936e-23
	28.25	9	41	41663	8337	6.96041e-24	1.54676e-23
	28.2667	9	41	41681	8319	6.39564e-24	1.42477e-23
	28.2833	9	41	41671	8329	6.70365e-24	1.49062e-23
	28.3	9	41	41629	8371	8.16255e-24	1.8061e-23
	28.3167	9	41	41631	8369	8.08656e-24	1.79148e-23
	28.3333	9	41	41617	8383	8.63328e-24	1.90674e-23
	28.35	9	41	41624	8376	8.35557e-24	1.84653e-23
	28.3667	9	41	41611	8389	8.87844e-24	1.95968e-23
	28.3833	9	41	41572	8428	1.06454e-23	2.33822e-23
	28.4	9	41	41565	8435	1.09969e-23	2.41101e-23
	28.4167	9	41	41599	8401	9.38927e-24	2.06989e-23
	28.4333	9	41	41566	8434	1.0946e-23	2.40132e-23
	28.45	9	41	41536	8464	1.25772e-23	2.74745e-23
	28.4667	9	41	41549	8451	1.18432e-23	2.59183e-23
	28.4833	9	41	41515	8485	1.38574e-23	3.01795e-23
	28.5	9	41	41454	8546	1.83377e-23	3.98165e-23
	28.5167	9	41	41421	8579	2.13197e-23	4.60968e-23
	28.5333	9	41	41442	8558	1.93718e-23	4.20366e-23
	28.55	9	41	41430	8570	2.04627e-23	4.42968e-23
	28.5667	8	42	41379	8621	1.15034e-24	2.68736e-24
	28.5833	8	42	41346	8654	1.34168e-24	3.09223e-24
	28.6	8	42	41294	8706	1.70769e-24	3.9033e-24
	28.6167	8	42	41269	8731	1.91665e-24	4.36152e-24
	28.6333	8	42	41240	8760	2.19032e-24	4.95921e-24
	28.65	7	43	41195	8805	1.0691e-25	2.61464e-25
	28.6667	7	43	41219	8781	9.54759e-26	2.34777e-25
	28.6833	6	44	41195	8805	3.63236e-27	1.0248e-26
	28.7	6	44	41186	8814	3.79409e-27	1.06128e-26
	28.7167	5	45	41158	8842	1.24357e-28	4.42815e-28
	28.7333	5	45	41133	8867	1.40742e-28	4.88592e-28
	28.75	7	43	41138	8862	1.39679e-25	3.36576e-25
	28.7667	7	43	41140	8860	1.38379e-25	3.34114e-25
	28.7833	8	42	41130	8870	3.6188e-24	8.11188e-24
	28.8	9	41	41136	8864	7.64052e-23	1.58444e-22
	28.8167	9	41	41158	8842	6.93435e-23	1.44299e-22
	28.8333	9	41	41146	8854	7.31126e-23	1.51703e-22
	28.85	9	41	41153	8847	7.08904e-23	1.47262e-22
	28.8667	9	41	41134	8866	7.70808e-23	1.59753e-22
	28.8833	9	41	41123	8877	8.09018e-23	1.67383e-22
	28.9	8	42	41107	8893	4.01606e-24	8.96887e-24
	28.9167	8	42	41116	8884	3.85579e-24	8.62165e-24
	28.9333	7	43	41101	8899	1.65992e-25	3.94958e-25
	28.95	7	43	41108	8892	1.60669e-25	3.82798e-25
	28.9667	8	42	41095	8905	4.23987e-24	9.46283e-24
	28.9833	8	42	41145	8855	3.38062e-24	7.60165e-24
	29	8	42	41119	8881	3.80377e-24	8.5159e-24
	29.0167	10	40	41157	8843	1.33207e-21	2.57404e-21
	29.0333	9	41	41187	8813	6.09984e-23	1.27154e-22
	29.05	9	41	41178	8822	6.34777e-23	1.32169e-22
	29.0667	9	41	41182	8818	6.23639e-23	1.29925e-22
	29.0833	9	41	41153	8847	7.08904e-23	1.47262e-22
	29.1	9	41	41199	8801	5.78387e-23	1.20777e-22
	29.1167	9	41	41213	8787	5.43535e-23	1.13631e-22
	29.1333	8	42	41180	8820	2.88271e-24	6.49421e-24
	29.15	8	42	41207	8793	2.54815e-24	5.7513e-24
	29.1667	8	42	41186	8814	2.80485e-24	6.32277e-24
	29.1833	8	42	41246	8754	2.13074e-24	4.82736e-24
	29.2	8	42	41252	8748	2.07275e-24	4.70188e-24
	29.2167	9	41	41230	8770	5.03954e-23	1.05479e-22
	29.2333	8	42	41219	8781	2.41189e-24	5.45402e-24
	29.25	8	42	41211	8789	2.50191e-24	5.65404e-24
	29.2667	8	42	41222	8778	2.37895e-24	5.38291e-24
	29.2833	7	43	41223	8777	9.36899e-26	2.31016e-25
	29.3	7	43	41231	8769	9.02151e-26	2.2352e-25
	29.3167	7	43	41210	8790	9.96166e-26	2.44291e-25
	29.3333	7	43	41230	8770	9.06425e-26	2.24424e-25
	29.35	7	43	41218	8782	9.59275e-26	2.35726e-25
	29.3667	7	43	41183	8817	1.13117e-25	2.75895e-25
	29.3833	7	43	41182	8818	1.1365e-25	2.77007e-25
	29.4	7	43	41181	8819	1.14185e-25	2.78123e-25
	29.4167	9	41	41195	8805	5.88738e-23	1.22867e-22
	29.4333	10	40	41155	8845	1.34351e-21	2.59476e-21
	29.45	10	40	41165	8835	1.28723e-21	2.49008e-21
	29.4667	10	40	41203	8797	1.09354e-21	2.12453e-21
	29.4833	10	40	41255	8745	8.73762e-22	1.70121e-21
	29.5	10	40	41293	8707	7.4096e-22	1.44499e-21
	29.5167	10	40	41313	8687	6.79169e-22	1.32737e-21
	29.5333	10	40	41346	8654	5.88e-22	1.15169e-21
	29.55	10	40	41378	8622	5.11012e-22	1.00637e-21
	29.5667	10	40	41400	8600	4.63864e-22	9.1502e-22
	29.5833	10	40	41405	8595	4.53754e-22	8.96059e-22
	29.6	10	40	41432	8568	4.02752e-22	7.96653e-22
	29.6167	10	40	41453	8547	3.6698e-22	7.27494e-22
	29.6333	10	40	41490	8510	3.11325e-22	6.21268e-22
	29.65	10	40	41485	8515	3.18336e-22	6.33504e-22
	29.6667	10	40	41499	8501	2.99081e-22	5.97498e-22
	29.6833	10	40	41533	8467	2.56913e-22	5.15832e-22
	29.7	9	41	41521	8479	1.34792e-23	2.93914e-23
	29.7167	9	41	41489	8511	1.56189e-23	3.39747e-23
	29.7333	9	41	41392	8608	2.43259e-23	5.2158e-23
	29.75	9	41	41379	8621	2.58038e-23	5.51298e-23
	29.7667	9	41	41364	8636	2.76177e-23	5.89004e-23
	29.7833	9	41	41349	8651	2.95555e-23	6.29585e-23
	29.8	8	42	41310	8690	1.58579e-24	3.63621e-24
	29.8167	7	43	41322	8678	5.85428e-26	1.46357e-25
	29.8333	7	43	41295	8705	6.659e-26	1.66244e-25
	29.85	7	43	41282	8718	7.08397e-26	1.76364e-25
	29.8667	7	43	41252	8748	8.16808e-26	2.03074e-25
	29.8833	7	43	41208	8792	1.0056e-25	2.4627e-25
	29.9	7	43	41175	8825	1.17449e-25	2.85686e-25
	29.9167	6	44	41193	8807	3.66771e-27	1.03397e-26
	29.9333	6	44	41188	8812	3.75755e-27	1.05434e-26
	29.95	6	44	41170	8830	4.09913e-27	1.13953e-26
	29.9667	5	45	41177	8823	1.13166e-28	4.14021e-28
	29.9833	6	44	41182	8818	3.8682e-27	1.0795e-26
	30	6	44	41190	8810	3.72136e-27	1.045e-26
	30.0167	6	44	41176	8824	3.98203e-27	1.10955e-26
	30.0333	6	44	41129	8871	4.99419e-27	1.35794e-26
	30.05	6	44	41185	8815	3.81249e-27	1.0656e-26
	30.0667	6	44	41157	8843	4.36448e-27	1.20307e-26
	30.0833	5	45	41205	8795	9.84449e-29	3.70326e-28
	30.1	6	44	41218	8782	3.249e-27	9.20976e-27
	30.1167	6	44	41196	8804	3.61481e-27	1.02065e-26
	30.1333	6	44	41146	8854	4.60204e-27	1.26468e-26
	30.15	6	44	41102	8898	5.68495e-27	1.52502e-26
	30.1667	6	44	41117	8883	5.29045e-27	1.42985e-26
	30.1833	6	44	41103	8897	5.65778e-27	1.52114e-26
	30.2	6	44	41093	8907	5.93528e-27	1.58981e-26
	30.2167	5	45	41087	8913	1.76572e-28	5.96863e-28
	30.2333	6	44	41081	8919	6.28585e-27	1.67499e-26
	30.25	6	44	41096	8904	5.85067e-27	1.56831e-26
	30.2667	6	44	41084	8916	6.19636e-27	1.65481e-26
	30.2833	7	43	41101	8899	1.65992e-25	3.94958e-25
	30.3	8	42	41119	8881	3.80377e-24	8.5159e-24
	30.3167	7	43	41156	8844	1.28395e-25	3.1168e-25
	30.3333	7	43	41158	8842	1.27197e-25	3.08981e-25
	30.35	6	44	41193	8807	3.66771e-27	1.03397e-26
	30.3667	6	44	41187	8813	3.77578e-27	1.05698e-26
	30.3833	6	44	41167	8833	4.15893e-27	1.1517e-26
	30.4	6	44	41142	8858	4.69152e-27	1.28535e-26
	30.4167	6	44	41143	8857	4.66899e-27	1.28015e-26
	30.4333	7	43	41173	8827	1.18557e-25	2.88186e-25
	30.45	7	43	41132	8868	1.43651e-25	3.45453e-25
	30.4667	7	43	41134	8866	1.42315e-25	3.42469e-25
	30.4833	8	42	41153	8847	3.25991e-24	7.3348e-24
	30.5	7	43	41117	8883	1.54069e-25	3.68291e-25
	30.5167	7	43	41132	8868	1.43651e-25	3.45453e-25
	30.5333	8	42	41137	8863	3.50568e-24	7.87303e-24
	30.55	8	42	41145	8855	3.38062e-24	7.60165e-24
	30.5667	6	44	41169	8831	4.11897e-27	1.14328e-26
	30.5833	6	44	41170	8830	4.09913e-27	1.13953e-26
	30.6	6	44	41168	8832	4.1389e-27	1.14792e-26
	30.6167	7	43	41188	8812	1.10489e-25	2.69668e-25
	30.6333	8	42	41209	8791	2.52493e-24	5.70247e-24
	30.65	9	41	41256	8744	4.48787e-23	9.42609e-23
	30.6667	8	42	41200	8800	2.63106e-24	5.93473e-24
	30.6833	8	42	41258	8742	2.01629e-24	4.57958e-24
	30.7	9	41	41267	8733	4.27258e-23	8.98965e-23
	30.7167	9	41	41280	8720	4.03109e-23	8.50142e-23
	30.7333	9	41	41254	8746	4.52813e-23	9.50511e-23
	30.75	9	41	41248	8752	4.65103e-23	9.75173e-23
	30.7667	10	40	41268	8732	8.25916e-22	1.60893e-21
	30.7833	10	40	41286	8714	7.63851e-22	1.48883e-21
	30.8	10	40	41324	8676	6.4735e-22	1.26587e-21
	30.8167	9	41	41309	8691	3.53925e-23	7.48608e-23
	30.8333	8	42	41294	8706	1.70769e-24	3.9033e-24
	30.85	8	42	41309	8691	1.59316e-24	3.65077e-24
	30.8667	8	42	41294	8706	1.70769e-24	3.9033e-24
	30.8833	8	42	41276	8724	1.85575e-24	4.22562e-24
	30.9	8	42	41263	8737	1.97039e-24	4.48098e-24
	30.9167	9	41	41279	8721	4.04918e-23	8.53458e-23
	30.9333	9	41	41296	8704	3.75205e-23	7.91757e-23
	30.95	9	41	41263	8737	4.34968e-23	9.14652e-23
	30.9667	9	41	41261	8739	4.38873e-23	9.22326e-23
	30.9833	9	41	41270	8730	4.21563e-23	8.87502e-23
	31	9	41	41277	8723	4.08561e-23	8.60632e-23
	31.0167	10	40	41306	8694	7.00203e-22	1.36773e-21
	31.0333	10	40	41303	8697	7.09411e-22	1.38497e-21
	31.05	9	41	41338	8662	3.106e-23	6.60071e-23
	31.0667	10	40	41356	8644	5.62804e-22	1.10294e-21
	31.0833	10	40	41365	8635	5.41027e-22	1.06373e-21
	31.1	9	41	41347	8653	2.98237e-23	6.34922e-23
	31.1167	10	40	41365	8635	5.41027e-22	1.06373e-21
	31.1333	9	41	41397	8603	2.37797e-23	5.10477e-23
	31.15	9	41	41383	8617	2.534e-23	5.42032e-23
	31.1667	9	41	41385	8615	2.51111e-23	5.38096e-23
	31.1833	9	41	41414	8586	2.20104e-23	4.75045e-23
	31.2	9	41	41413	8587	2.21109e-23	4.76927e-23
	31.2167	8	42	41371	8629	1.19413e-24	2.78063e-24
	31.2333	8	42	41364	8636	1.23377e-24	2.86368e-24
	31.25	8	42	41412	8588	9.85677e-25	2.31621e-24
	31.2667	8	42	41407	8593	1.00906e-24	2.36961e-24
	31.2833	8	42	41392	8608	1.0825e-24	2.54042e-24
	31.3	8	42	41349	8651	1.32308e-24	3.05131e-24
	31.3167	8	42	41373	8627	1.18303e-24	2.75836e-24
	31.3333	8	42	41358	8642	1.26877e-24	2.93168e-24
	31.35	7	43	41342	8658	5.32015e-26	1.33281e-25
	31.3667	8	42	41375	8625	1.17204e-24	2.7345e-24
	31.3833	8	42	41385	8615	1.11853e-24	2.61815e-24
	31.4	8	42	41371	8629	1.19413e-24	2.78063e-24
	31.4167	9	41	41399	8601	2.35646e-23	5.06463e-23
	31.4333	9	41	41409	8591	2.25171e-23	4.85107e-23
	31.45	9	41	41437	8563	1.98193e-23	4.29557e-23
	31.4667	9	41	41421	8579	2.13197e-23	4.60968e-23
	31.4833	8	42	41478	8522	7.22335e-25	1.70072e-24
	31.5	9	41	41520	8480	1.35416e-23	2.95095e-23
	31.5167	9	41	41533	8467	1.27528e-23	2.78412e-23
	31.5333	9	41	41599	8401	9.38927e-24	2.06989e-23
	31.55	9	41	41648	8352	7.46787e-24	1.65748e-23
	31.5667	9	41	41710	8290	5.57826e-24	1.24422e-23
	31.5833	9	41	41681	8319	6.39564e-24	1.42477e-23
	31.6	10	40	41649	8351	1.52219e-22	3.12243e-22
	31.6167	10	40	41669	8331	1.38975e-22	2.85402e-22
	31.6333	10	40	41646	8354	1.54308e-22	3.16169e-22
	31.65	10	40	41642	8358	1.57137e-22	3.21783e-22
	31.6667	11	39	41623	8377	3.10103e-21	5.81444e-21
	31.6833	11	39	41647	8353	2.79058e-21	5.26248e-21
	31.7	11	39	41628	8372	3.03371e-21	5.69413e-21
	31.7167	11	39	41635	8365	2.94183e-21	5.53033e-21
	31.7333	10	40	41649	8351	1.52219e-22	3.12243e-22
	31.75	10	40	41675	8325	1.35225e-22	2.7786e-22
	31.7667	11	39	41644	8356	2.82767e-21	5.32406e-21
	31.7833	11	39	41652	8348	2.72981e-21	5.15328e-21
	31.8	11	39	41618	8382	3.16981e-21	5.9372e-21
	31.8167	10	40	41627	8373	1.68204e-22	3.43858e-22
	31.8333	10	40	41579	8421	2.08949e-22	4.2474e-22
	31.85	10	40	41559	8441	2.28625e-22	4.62128e-22
	31.8667	10	40	41558	8442	2.29655e-22	4.63949e-22
	31.8833	10	40	41570	8430	2.1759e-22	4.40565e-22
	31.9	10	40	41574	8426	2.13707e-22	4.33435e-22
	31.9167	10	40	41558	8442	2.29655e-22	4.63949e-22
	31.9333	10	40	41560	8440	2.276e-22	4.60314e-22
	31.95	10	40	41551	8449	2.3699e-22	4.7716e-22
	31.9667	10	40	41536	8464	2.53483e-22	5.09513e-22
	31.9833	10	40	41537	8463	2.52349e-22	5.07519e-22
	32	10	40	41598	8402	1.91787e-22	3.90958e-22
	32.0167	10	40	41575	8425	2.12747e-22	4.31731e-22
	32.0333	10	40	41573	8427	2.14672e-22	4.35146e-22
	32.05	10	40	41553	8447	2.34871e-22	4.73955e-22
	32.0667	10	40	41579	8421	2.08949e-22	4.2474e-22
	32.0833	10	40	41552	8448	2.35928e-22	4.75289e-22
	32.1	11	39	41573	8427	3.85923e-21	7.20229e-21
	32.1167	11	39	41568	8432	3.94427e-21	7.35338e-21
	32.1333	10	40	41573	8427	2.14672e-22	4.35146e-22
	32.15	10	40	41553	8447	2.34871e-22	4.73955e-22
	32.1667	10	40	41515	8485	2.7846e-22	5.58161e-22
	32.1833	11	39	41533	8467	4.59266e-21	8.53125e-21
	32.2	11	39	41608	8392	3.31183e-21	6.19999e-21
	32.2167	12	38	41644	8356	4.59158e-20	8.2074e-20
	32.2333	11	39	41685	8315	2.35977e-21	4.47585e-21
	32.25	13	37	41696	8304	5.41277e-19	9.37728e-19
	32.2667	13	37	41775	8225	3.89492e-19	6.79346e-19
	32.2833	12	38	41736	8264	3.09606e-20	5.58687e-20
	32.3	12	38	41776	8224	2.60468e-20	4.73818e-20
	32.3167	12	38	41785	8215	2.50503e-20	4.56382e-20
	32.3333	11	39	41776	8224	1.57406e-21	3.02705e-21
	32.35	11	39	41770	8230	1.61689e-21	3.10609e-21
	32.3667	11	39	41764	8236	1.66085e-21	3.18713e-21
	32.3833	11	39	41740	8260	1.84857e-21	3.53229e-21
	32.4	11	39	41763	8237	1.66828e-21	3.19969e-21
	32.4167	11	39	41799	8201	1.41987e-21	2.73491e-21
	32.4333	11	39	41774	8226	1.58822e-21	3.05263e-21
	32.45	11	39	41805	8195	1.38213e-21	2.66648e-21
	32.4667	11	39	41801	8199	1.40718e-21	2.71191e-21
	32.4833	11	39	41789	8211	1.48502e-21	2.85886e-21
	32.5	11	39	41727	8273	1.95869e-21	3.73677e-21
	32.5167	12	38	41769	8231	2.68483e-20	4.87659e-20
	32.5333	12	38	41752	8248	2.88957e-20	5.23e-20
	32.55	12	38	41756	8244	2.84008e-20	5.14818e-20
	32.5667	12	38	41739	8261	3.05628e-20	5.52063e-20
	32.5833	11	39	41724	8276	1.98499e-21	3.78294e-21
	32.6	11	39	41691	8309	2.29794e-21	4.36548e-21
	32.6167	11	39	41680	8320	2.41253e-21	4.5687e-21
	32.6333	10	40	41609	8391	1.82486e-22	3.72209e-22
	32.65	10	40	41586	8414	2.02459e-22	4.12247e-22
	32.6667	10	40	41551	8449	2.3699e-22	4.7716e-22
	32.6833	10	40	41489	8511	3.12715e-22	6.23697e-22
	32.7	10	40	41481	8519	3.24055e-22	6.44529e-22
	32.7167	9	41	41470	8530	1.70421e-23	3.70256e-23
	32.7333	9	41	41421	8579	2.13197e-23	4.60968e-23
	32.75	10	40	41391	8609	4.82617e-22	9.51491e-22
	32.7667	11	39	41346	8654	1.02408e-20	1.89255e-20
	32.7833	12	38	41314	8686	1.81806e-19	3.21623e-19
	32.8	11	39	41310	8690	1.19249e-20	2.19814e-20
	32.8167	11	39	41313	8687	1.17749e-20	2.17271e-20
	32.8333	11	39	41309	8691	1.19753e-20	2.2063e-20
	32.85	11	39	41289	8711	1.30284e-20	2.39909e-20
	32.8667	11	39	41262	8738	1.45936e-20	2.68182e-20
	32.8833	11	39	41191	8809	1.96315e-20	3.59296e-20
	32.9	11	39	41212	8788	1.79877e-20	3.29379e-20
	32.9167	10	40	41182	8818	1.19678e-21	2.32134e-21
	32.9333	9	41	41155	8845	7.02676e-23	1.46053e-22
	32.95	10	40	41179	8821	1.21228e-21	2.34888e-21
	32.9667	11	39	41155	8845	2.27946e-20	4.15918e-20
	32.9833	10	40	41183	8817	1.19166e-21	2.31265e-21
	33	10	40	41154	8846	1.34927e-21	2.60449e-21
	33.0167	12	38	41143	8857	3.62853e-19	6.34419e-19
	33.0333	11	39	41124	8876	2.59103e-20	4.71811e-20
	33.05	11	39	41124	8876	2.59103e-20	4.71811e-20
	33.0667	11	39	41111	8889	2.73366e-20	4.96276e-20
	33.0833	11	39	41081	8919	3.09248e-20	5.58322e-20
	33.1	11	39	41087	8913	3.01724e-20	5.45285e-20
	33.1167	11	39	41079	8921	3.11797e-20	5.62358e-20
	33.1333	11	39	41095	8905	2.91968e-20	5.28183e-20
	33.15	11	39	41164	8836	2.19603e-20	4.00899e-20
	33.1667	11	39	41116	8884	2.67792e-20	4.86649e-20
	33.1833	11	39	41138	8862	2.44552e-20	4.45765e-20
[truncated: 5,210 more rows]
