# Supplementary material for: Accept–reject decision-making revealed via a quantitative and ethological study of C. elegans foraging
Source: eLife. 2025 Sep 10;13:RP103191. doi: 10.7554/eLife.103191 (PMC12422737; doi:10.7554/eLife.103191)
Supplement: Figure 1—source data 5. [file elife-103191-fig1-data5.xlsx]

## Sheet: Sheet1
Figure 1 - Source Data 5
Figure 1L - Velocity of animals upon encounter with patch edge
Summary Statistics
	encounter alignment	# worms	# encounters	# replicates		* original: time windows aligned to the start of each patch encounter
	original	50	419	N/A		* permuted: time windows aligned to a random time point
	permuted	50	419	1000
Source Data
	time to patch entry (s)	original	permuted		* original: mean of mean trajectory for each animal (black line)
	-20	205.177	89.8044		* permuted: mean of means for only one replicate of permutation is shown (dark pink line)
	-19.75	205.883	89.6302
	-19.5	206.381	89.7018
	-19.25	206.006	89.8942
	-19	205.891	90.0984
	-18.75	206.598	90.1185
	-18.5	207.332	90.104
	-18.25	208.017	90.1734
	-18	208.402	90.4288
	-17.75	208.721	90.8205
	-17.5	208.459	91.2717
	-17.25	208.047	91.7007
	-17	207.847	91.5939
	-16.75	207.942	91.0295
	-16.5	208.636	90.7452
	-16.25	209.416	90.6962
	-16	210.174	90.8412
	-15.75	210.964	90.7279
	-15.5	211.612	90.5805
	-15.25	212.256	90.4921
	-15	212.988	90.4673
	-14.75	212.548	90.333
	-14.5	212.411	90.2685
	-14.25	213.091	90.1201
	-14	213.129	89.7548
	-13.75	213.881	89.3454
	-13.5	214.395	89.0204
	-13.25	214.777	88.7931
	-13	215.358	88.6745
	-12.75	215.16	88.5023
	-12.5	215.062	88.8639
	-12.25	215.086	88.2573
	-12	214.871	87.4776
	-11.75	213.812	87.0986
	-11.5	213.572	86.8774
	-11.25	213.659	86.7249
	-11	213.649	87.0002
	-10.75	214.484	87.0395
	-10.5	214.339	87.4931
	-10.25	214.093	87.5611
	-10	214.383	87.6014
	-9.75	214.447	87.8274
	-9.5	215.411	88.1788
	-9.25	215.736	88.6074
	-9	215.972	88.7373
	-8.75	215.864	88.9242
	-8.5	216.146	89.2535
	-8.25	216.65	89.7172
	-8	217.041	90.6868
	-7.75	217.749	90.9406
	-7.5	218.271	90.8999
	-7.25	218.321	90.6645
	-7	217.915	90.3273
	-6.75	217.618	90.1984
	-6.5	217.644	90.2227
	-6.25	217.856	90.4415
	-6	218.123	90.6686
	-5.75	218.445	90.3822
	-5.5	217.96	89.8777
	-5.25	217.241	89.4253
	-5	216.833	88.7708
	-4.75	217.526	88.8152
	-4.5	217.46	88.5259
	-4.25	216.927	88.1426
	-4	216.214	87.7194
	-3.75	217.072	88.2596
	-3.5	217.32	88.6934
	-3.25	217.369	89.0657
	-3	217.615	89.227
	-2.75	218.064	89.2736
	-2.5	218.24	89.132
	-2.25	218.114	89.0162
	-2	217.661	89.1348
	-1.75	219.427	89.4485
	-1.5	220.273	89.8976
	-1.25	220.384	90.3073
	-1	219.939	90.8012
	-0.75	217.522	91.0724
	-0.5	214.759	91.2085
	-0.25	211.631	91.4586
	0	206.521	92.0709
	0.25	201.279	91.7773
	0.5	195.958	92.1646
	0.75	190.477	92.2821
	1	184.755	92.4267
	1.25	178.426	92.5167
	1.5	171.68	92.7636
	1.75	164.783	92.9298
	2	158.005	92.7738
	2.25	149.184	93.3782
	2.5	141.301	93.4551
	2.75	134.172	93.6418
	3	127.604	94.1188
	3.25	122.204	94.3221
	3.5	117.668	94.8193
	3.75	113.541	95.2488
	4	109.354	95.2338
	4.25	106.399	95.0799
	4.5	104.018	94.7766
	4.75	102.089	94.4868
	5	100.489	94.3813
	5.25	99.3417	94.1317
	5.5	98.3572	94.0533
	5.75	97.4865	94.1039
	6	96.8078	94.2386
	6.25	96.0114	93.8566
	6.5	95.8322	93.5459
	6.75	95.9758	93.1851
	7	96.1252	92.6404
	7.25	96.4043	92.7082
	7.5	96.4231	92.2177
	7.75	96.3373	91.7749
	8	96.3156	91.6218
	8.25	96.4914	91.5402
	8.5	96.6164	91.3915
	8.75	96.5457	91.256
	9	96.1234	91.2214
	9.25	95.9354	91.9306
	9.5	95.7014	91.4662
	9.75	95.7714	91.2893
	10	96.5342	91.6377
	10.25	96.8534	91.3844
	10.5	96.6785	91.1017
	10.75	96.3287	90.7381
	11	96.158	90.2262
	11.25	95.6775	89.7497
	11.5	95.7151	89.6439
	11.75	96.1045	89.646
	12	96.654	89.459
	12.25	96.5651	88.9396
	12.5	96.5263	88.8951
	12.75	96.6127	88.955
	13	96.8991	88.69
	13.25	97.0535	88.482
	13.5	97.3375	88.4383
	13.75	97.5932	88.3263
	14	97.6366	87.7505
	14.25	98.2741	88.0596
	14.5	98.9953	88.2586
	14.75	99.6847	88.6174
	15	100.218	88.8638
	15.25	100.378	89.066
	15.5	100.68	89.4747
	15.75	101.025	90.019
	16	101.285	90.6151
	16.25	102.037	91.3269
	16.5	102.483	91.3629
	16.75	102.922	91.5346
	17	103.723	92.0639
	17.25	104.26	92.5139
	17.5	104.999	92.9456
	17.75	105.737	93.7187
	18	106.221	94.0675
	18.25	106.712	94.3226
	18.5	106.612	94.3348
	18.75	106.405	94.3979
	19	106.677	94.8683
	19.25	107.431	95.2068
	19.5	107.92	95.2155
	19.75	108.222	95.1694
	20	108.453	95.4028
	20.25	108.434	95.5617
	20.5	108.86	95.7627
	20.75	109.344	95.7925
	21	109.392	95.3825
	21.25	109.611	95.6828
	21.5	109.767	95.6195
	21.75	109.911	95.4091
	22	110.112	95.6644
	22.25	110.056	95.6634
	22.5	110.71	95.6867
	22.75	111.595	95.5617
	23	112.094	95.2134
	23.25	112.461	94.9333
	23.5	112.843	94.6905
	23.75	113.357	94.5025
	24	114.147	94.3959
	24.25	115.057	93.6678
	24.5	115.918	93.315
	24.75	116.821	93.1042
	25	117.87	92.7024
	25.25	118.769	92.2498
	25.5	119.459	91.9108
	25.75	120.123	91.8734
	26	120.993	91.5829
	26.25	122.285	91.2553
	26.5	122.977	90.917
	26.75	123.421	90.6355
	27	124.102	90.7481
	27.25	124.904	90.5771
	27.5	125.587	90.67
	27.75	126.285	90.7618
	28	126.839	90.483
	28.25	127.19	90.714
	28.5	127.578	90.8266
	28.75	128.023	90.9371
	29	128.538	91.1296
	29.25	128.898	90.9821
	29.5	129.321	91.072
	29.75	129.685	91.2051
	30	129.814	91.3056
	30.25	129.533	91.2435
	30.5	130.054	91.4206
	30.75	130.83	91.6276
	31	131.076	91.8095
	31.25	131.602	91.8012
	31.5	132.018	91.6182
	31.75	132.381	91.5285
	32	132.789	91.328
	32.25	133.195	91.3152
	32.5	133.442	91.1692
	32.75	133.602	91.0807
	33	133.778	91.3307
	33.25	134.078	91.4609
	33.5	134.641	91.4044
	33.75	135.349	91.1697
	34	136.044	90.7737
	34.25	136.951	90.7382
	34.5	137.425	90.6219
	34.75	137.82	90.4244
	35	138.126	90.1669
	35.25	138.513	90.3473
	35.5	138.631	90.6365
	35.75	138.619	91.0063
	36	138.684	91.5362
	36.25	138.927	92.0571
	36.5	138.765	92.4127
	36.75	138.926	92.4834
	37	139.189	92.6046
	37.25	139.691	92.5762
	37.5	140.008	92.7698
	37.75	140.152	92.9459
	38	140.167	93.0343
	38.25	139.715	93.2638
	38.5	139.544	93.6058
	38.75	140.429	93.672
	39	140.702	93.5157
	39.25	140.951	93.3634
	39.5	141.295	93.1849
	39.75	141.523	92.7504
	40	141.323	91.6395
