# Supplementary material for: Accept–reject decision-making revealed via a quantitative and ethological study of C. elegans foraging
Source: eLife. 2025 Sep 10;13:RP103191. doi: 10.7554/eLife.103191 (PMC12422737; doi:10.7554/eLife.103191)
Supplement: Figure 1—source data 6. [file elife-103191-fig1-data6.xlsx]

## Sheet: Sheet1
Figure 1 - Source Data 6
Figure 1M - Deceleration of animals upon encounter with patch edge
Summary Statistics
	encounter type	# worms	# encounters	# replicates	mean	std	median	2.5%	97.5%	p value		* deceleration measured in μm/s^2 as described in methods and Figure 1 - supplement 5
	all	50	21543	N/A	-19.5414	10.9959	-21.3197	-39.1849	3.30785	4.32114e-200		* p value calculated using one-tailed Mann-Whitney U-Test with Bonferonni Correction for multiple comparisons
	short	50	313	N/A	-18.7839	11.3768	-19.68	-39.1424	4.374	2.1251e-142
	long	50	106	N/A	-21.778	9.48578	-22.4478	-39.0441	-1.52024	5.93487e-60
	permuted	50	419	1000	-0.0487496	7.05505	0	-16.5313	14.7555
Source Data
	worm #	encounter #	Δ velocity (μm/s^2)	Δ velocity (permuted)	p(long duration)	label		* example deceleration values shown for one replicate (of 1000) of permuting temporal alignment of patch encounter
	1	1	-2.07345	1.06203	1.10226e-06	short
	1	2	-14.9668	2.68571	2.67705e-06	short
	1	3	-25.2342	-2.30283	0.0118769	short
	1	4	-27.1137	3.39726	7.47375e-06	short
	1	5	-12.1586	-11.4357	2.67705e-06	short
	1	6	-29.6377	-2.56494	3.51205e-06	short
	1	7	-30.9768	0.101676	4.58038e-05	short
	1	8	-11.7826	0.596242	2.40547e-05	short
	1	9	-24.6746	-6.36306	0.000603784	short
	1	10	-29.5142	5.38927	0.996698	long
	1	11	-19.9348	-5.0237	2.21991e-06	short
	1	12	-26.5125	-5.61211	5.17588e-05	short
	1	13	-32.5506	-1.71778	0.000115547	short
	1	14	-27.4925	-3.5606	0.000135778	short
	1	15	-26.7657	-1.79063	0.0714552	short
	1	16	-28.9703	5.34089	1	long
	1	17	-18.8836	-25.7324	0.999999	long
	2	1	-27.7617	0.88811	3.79813e-05	short
	2	2	-13.5925	-2.68101	6.36351e-06	short
	2	3	-25.2968	1.49333	0.00181232	short
	2	4	-39.4289	1.46958	1	long
	2	5	-11.9005	2.53746	1	long
	3	1	-15.3043	-2.88905	8.0884e-06	short
	3	2	-23.2187	-4.83115	0.000115547	short
	3	3	-20.0407	0.135084	0.00046232	short
	3	4	-22.9258	-0.795146	0.999985	long
	3	5	-17.6239	1.34931	8.27744e-05	short
	3	6	-14.1791	2.18902	1	long
	4	1	-14.7421	3.84725	2.93411e-06	short
	4	2	-13.8799	0.118101	0.000384895	short
	4	3	-22.2217	0.207596	1.70356e-05	short
	4	4	-7.5869	0.0412146	3.94888e-07	short
	4	5	-10.096	0	2.09954e-05	short
	4	6	-11.8583	1.7075	1	long
	5	1	5.79879	1.26038	1.62775e-09	short
	5	2	-13.5674	-5.40045	0.000115545	short
	5	3	-8.79524	1.72902	5.17578e-05	short
	5	4	-4.37021	-1.13006	1	long
	6	1	-24.3309	2.3113	9.79806e-05	short
	6	2	-13.4608	-5.4781	2.74897e-05	short
	6	3	-16.0205	-0.728483	5.17588e-05	short
	6	4	2.68049	-1.10101	1.66036e-08	short
	6	5	-14.8842	16.3864	5.18468e-08	short
	6	6	-31.7327	13.2329	0.00474925	short
	6	7	-23.5303	1.74309	0.899443	long
	6	8	-21.9541	19.0013	3.13391e-05	short
	6	9	-10.7434	16.8843	3.01758e-08	short
	6	10	-21.5714	1.70846	1.22388e-06	short
	6	11	-11.2544	1.28928	6.89954e-06	short
	6	12	-13.2746	-13.2398	0.999752	long
	6	13	-8.15914	2.11659	7.96885e-07	short
	6	14	-19.6639	-0.418446	2.21991e-06	short
	6	15	-14.1045	0.178831	1	long
	7	1	-2.10366	-3.72528	3.01728e-08	short
	7	2	-36.5126	0	1.82751e-05	short
	7	3	-18.0336	-5.53703	1.35653e-06	short
	7	4	-32.1756	1.59913	4.86961e-05	short
	7	5	-32.4593	-7.58278	0.999982	long
	7	6	-26.9876	-1.55304	7.8171e-05	short
	7	7	-29.4085	2.63231	5.17517e-05	short
	7	8	-33.2261	5.30253	3.34274e-05	short
	7	9	-30.0388	1.24993	1	long
	8	1	-21.383	1.74924	0.000227	short
	8	2	-30.3254	6.94997	4.3049e-05	short
	8	3	-29.5592	-1.48572	0.000304118	short
	8	4	-30.3006	2.39599	1.09988e-05	short
	8	5	-27.1786	6.84898	1.82751e-05	short
	8	6	-18.204	-0.996815	1.95936e-05	short
	8	7	-21.3197	0.698855	0.000367358	short
	8	8	-11.1505	-4.37691	1	long
	9	1	-23.1351	-0.356139	0.000185585	short
	9	2	-29.1647	0.547342	0.00235334	short
	9	3	-27.7729	3.17524	1	long
	9	4	-12.6601	3.88489	0.999976	long
	9	5	-4.46919	0.962602	1	long
	9	6	-12.7986	-5.92551	0.033938	short
	10	1	-18.4234	0	2.01748e-06	short
	10	2	-5.85457	-0.00271859	3.34319e-05	short
	10	3	-21.7996	4.16678	0.679665	long
	10	4	-22.2569	-0.827861	0.000250596	short
	10	5	-12.9958	-14.1657	0.00117982	short
	10	6	-12.6479	-1.64614	1	long
	11	1	3.28814	-2.4971	0.00374059	short
	11	2	-11.5435	-0.548133	8.89384e-07	short
	11	3	-19.2513	4.40705	1.22373e-06	short
	11	4	-21.8513	1.33911	0.999995	long
	11	5	-24.885	-7.5762	1	long
	12	1	-6.86602	2.43294	3.94894e-07	short
	12	2	-13.8237	-3.29905	7.12572e-07	short
	12	3	-20.1327	-0.389092	5.39751e-06	short
	12	4	-19.5634	5.1098	0.0275662	short
	12	5	-24.1613	-4.43752	1.82776e-05	short
	12	6	-19.5352	1.42478	0.000289916	short
	12	7	-27.8173	1.85448	3.34319e-05	short
	12	8	-35.8764	-4.97567	1	long
	12	9	-8.17894	-0.519747	0.999996	long
	13	1	-24.9573	10.4999	0.0529222	short
	13	2	-23.4771	-6.05281	0.00876536	short
	13	3	-18.7498	-7.48577	0.000403114	short
	13	4	-8.80714	-0.0531918	0.000176345	short
	13	5	-32.2777	2.75648	0.00459215	short
	13	6	-14.843	-5.02787	5.17588e-05	short
	13	7	-24.6325	9.1975	0.00400809	short
	13	8	-4.65378	0.443537	3.48528e-07	short
	13	9	-25.0063	-10.0969	0.999887	long
	13	10	-18.806	0.402271	1	long
	14	1	-25.1099	-1.92739	0.000687568	short
	14	2	-28.388	1.9022	0.999999	long
	14	3	-29.8925	15.2555	0.0609088	short
	14	4	-25.9409	-0.330334	0.999826	long
	14	5	-3.53435	-1.61568	3.21164e-06	short
	14	6	-21.4863	0.0575265	6.19333e-05	short
	14	7	-1.28165	0.566185	1	long
	15	1	-7.41328	11.323	1.01978e-05	short
	15	2	-23.1475	0.203769	9.44732e-06	short
	15	3	-29.8081	-3.00922	2.57195e-05	short
	15	4	-24.2669	2.84228	2.01723e-06	short
	15	5	-20.6962	-0.0283432	4.46301e-07	short
	15	6	-12.8503	2.77259	2.67672e-06	short
	15	7	-23.0102	3.95825	2.0993e-05	short
	15	8	-28.7296	6.40245	0.000135759	short
	15	9	2.71544	5.02366	0.999951	long
	15	10	-21.7467	-0.996751	1	long
	16	1	-13.7601	1.74296	1.58654e-05	short
	16	2	-23.27	0.0593535	0.000403055	short
	16	3	-18.3605	-2.70242	1.37339e-05	short
	16	4	-9.28876	0.369165	2.67672e-06	short
	16	5	-18.3255	-2.44048	6.89866e-06	short
	16	6	-18.1061	1.56376	0.000483596	short
	16	7	-12.6219	-5.18442	1	long
	16	8	-30.3755	-0.639748	0.0682953	short
	17	1	-17.8952	-0.823919	8.74471e-06	short
	17	2	-19.2868	-6.3936	2.7486e-05	short
	17	3	-16.1984	-0.507377	0.000109396	short
	17	4	-14.9612	-12.9691	0.000630603	short
	17	5	-14.1569	-2.3251	0.0019543	short
	17	6	-16.0046	-6.07883	0.999853	long
	17	7	-30.8461	-3.94624	1	long
	18	1	-14.0281	0.34208	0.000276253	short
	18	2	-35.1363	0	0.000384903	short
	18	3	-27.9225	5.67571	1	long
	18	4	-21.8407	-2.00004	5.39751e-06	short
	18	5	-11.643	1.14071	4.96353e-06	short
	18	6	-26.1668	1.14071	0.000176345	short
	18	7	-32.0955	-3.58536	8.74584e-06	short
	18	8	-35.5053	6.83224	1.37357e-05	short
	18	9	-29.0601	1.80084	0.999996	long
	19	1	-1.7534	0	1.22386e-06	short
	19	2	-28.4412	13.5397	0.999999	long
	19	3	-21.7739	3.79704	0.995511	long
	19	4	-26.32	-1.9844	1	long
	20	1	-25.9735	0	1.18531e-05	short
	20	2	7.89854	-10.3343	1.15921e-07	short
	20	3	-36.2449	0.234516	3.83515e-06	short
	20	4	-12.9281	4.58297	3.13348e-05	short
	20	5	-18.3631	9.09432	0.00155439	short
	20	6	-9.9267	-0.579736	3.34274e-05	short
	20	7	-24.9245	-2.71351	0.000304118	short
	20	8	-19.0189	-1.28389	1	long
	20	9	-7.57335	5.88363	0.999999	long
	21	1	-8.60449	-1.75192	6.35856e-07	short
	21	2	-5.22462	0.580022	2.69385e-07	short
	21	3	-1.51458	3.25928	2.05952e-07	short
	21	4	-5.70567	-1.28533	2.05952e-07	short
	21	5	-10.6612	-6.84336	3.48489e-07	short
	21	6	-0.193398	-7.79231	2.67672e-06	short
	21	7	-33.5753	2.44647	0.999966	long
	21	8	4.39728	1.14941	3.9485e-07	short
	21	9	-8.31346	-2.88527	0.000289874	short
	21	10	-27.1975	-3.42927	0.999999	long
	21	11	-27.7527	-1.76458	1	long
	22	1	5.92847	-4.27913	5.03292e-07	short
	22	2	-28.4209	-3.8068	0.000135759	short
	22	3	2.31283	-0.204111	0.974224	long
	22	4	-21.7655	3.35569	0.999999	long
	22	5	-8.13031	1.19059	3.48489e-07	short
	22	6	-28.6591	-2.78801	1.18531e-05	short
	22	7	-27.8807	2.46749	0.00017632	short
	22	8	-12.785	4.10989	1.34521e-07	short
	22	9	-24.0248	8.08309	0.000630603	short
	22	10	-22.6669	6.87333	0.999988	long
	22	11	-27.9378	-5.53919	0.999999	long
	22	12	-6.55244	1.13269	0.00961264	short
	23	1	-15.047	0.619785	0.000227033	short
	23	2	-0.412663	-0.975817	9.91046e-07	short
	23	3	-20.9925	0.432528	0.00181232	short
	23	4	-16.2708	-2.7862	5.4979e-05	short
	23	5	-30.8389	-5.27703	0.997478	long
	23	6	-31.0364	6.25461	2.93417e-06	short
	23	7	-21.6808	2.24413	1.37357e-05	short
	23	8	-27.8487	-6.58121	0.000687671	short
	23	9	4.07655	1.22485	8.74584e-06	short
	23	10	-32.1404	0	0.000121979	short
	23	11	-27.6106	-12.2485	1	long
	24	1	-17.7964	2.54967	3.94888e-07	short
	24	2	-39.0551	-11.2539	1.58672e-05	short
	24	3	-17.0558	0.154834	1.47684e-05	short
	24	4	-33.5414	-2.46142	4.30541e-05	short
	24	5	-0.541709	-2.64382	6.36339e-06	short
	24	6	-29.4951	1.10824	1.70356e-05	short
	24	7	-33.6838	-12.5932	0.00524891	short
	24	8	-19.0636	2.30325	1.18545e-05	short
	24	9	-10.1347	3.31576	5.18461e-08	short
	24	10	-29.8304	-3.00361	1	long
	24	11	-35.2851	-3.22604	1	long
	25	1	-27.0545	-0.795853	1.35667e-06	short
	25	2	-31.448	-0.259957	4.30541e-05	short
	25	3	-42.371	0.766548	0.000350607	short
	25	4	-26.4725	11.6701	1.18545e-05	short
	25	5	-39.7688	-1.05874	0.00117979	short
	25	6	-35.1161	1.57674	8.74568e-06	short
	25	7	-24.253	8.83612	1	long
	25	8	-34.0349	-2.8672	1	long
	26	1	2.313	6.52342	2.93411e-06	short
	26	2	-27.8398	-0.919763	6.19406e-05	short
	26	3	-11.8064	-1.86766	2.93411e-06	short
	26	4	-28.4516	0.260707	0.000215986	short
	26	5	-37.8395	13.6981	0.00122796	short
	26	6	-16.2033	2.32596	4.35269e-08	short
	26	7	-27.3644	1.36	1.55569e-07	short
	26	8	-30.2826	-5.20762	0.000143168	short
	26	9	-32.759	-0.542527	0.999979	long
	26	10	-24.0445	0.248721	1.22386e-06	short
	26	11	-43.6976	1.12218	4.46344e-07	short
	26	12	-18.876	-6.04986	0.999977	long
	26	13	-29.8551	1.53852	1	long
	27	1	-22.4228	-8.45717	3.21164e-06	short
	27	2	-20.5991	-6.98988	6.89866e-06	short
	27	3	-14.4949	-4.32997	1.58654e-05	short
	27	4	-6.43937	-1.2385	2.9338e-06	short
	27	5	-18.4305	1.92734	4.86961e-05	short
	27	6	-20.6388	-2.76724	0.999928	long
	27	7	-26.3157	6.79728	1	long
	28	1	0.402516	-7.10408	0.000109396	short
	28	2	-33.0259	0.637992	0.105223	short
	28	3	-23.4567	-0.42307	1	long
	28	4	-36.8638	3.31576	0.956679	long
	28	5	-30.3609	2.46547	0.993708	long
	28	6	-36.9078	17.5897	0.000167459	short
	28	7	-33.4561	0.643075	0.803383	long
	29	1	-12.098	-1.88582	4.0444e-05	short
	29	2	-18.5855	-0.263033	9.79669e-05	short
	29	3	-5.83153	3.49651	0.0012278	short
	29	4	-22.0761	-6.7327	1	long
	29	5	-14.7838	3.99245	0.000422008	short
	29	6	-18.316	-1.89125	0.854526	long
	30	1	5.45013	0.685722	1.66034e-08	short
	30	2	-24.4159	3.05212	3.51198e-06	short
	30	3	-25.9707	-8.56643	4.30541e-05	short
	30	4	-21.4439	-7.28478	3.79806e-05	short
	30	5	-38.3654	-1.58488	0.000195293	short
	30	6	-23.7359	0.358788	2.93411e-06	short
	30	7	-29.6878	-20.3998	3.56434e-05	short
	30	8	-21.2602	-23.3984	5.66362e-07	short
	30	9	-17.0047	-0.0709287	1	long
	30	10	-2.55026	3.4801	6.19406e-05	short
	30	11	-19.1463	1.57109	7.81803e-05	short
	31	1	4.51481	-11.0389	1.16368e-09	short
	31	2	-33.1135	-29.4362	6.35919e-07	short
	31	3	-24.5217	7.09592	6.36339e-06	short
	31	4	-16.9669	0.34497	0.00218622	short
	31	5	-39.8865	-6.70577	0.000150907	short
	31	6	-18.7438	-0.373988	4.04488e-05	short
	31	7	-17.3258	-11.9733	0.999973	long
	31	8	-17.1839	-3.50894	2.43933e-06	short
	31	9	-22.9299	-15.6366	1.1e-05	short
	31	10	-19.68	12.9542	0.000176342	short
	31	11	-28.5966	1.68243	1	long
	31	12	-2.87221	-22.7248	1	long
	32	1	-13.1905	-9.49817	3.21198e-06	short
	32	2	-23.671	-2.07003	2.93595e-05	short
	32	3	-14.0353	1.67975	9.95293e-08	short
	32	4	-5.17123	1.74817	1.7929e-07	short
	32	5	-21.8838	0.385171	2.21987e-06	short
	32	6	-25.5833	0.327223	4.04488e-05	short
	32	7	-28.1035	-1.75354	7.81803e-05	short
	32	8	-29.8851	-0.295211	1	long
	33	1	-13.8346	-2.21383	4.96291e-06	short
	33	2	-24.3412	-2.78459	3.34274e-05	short
	33	3	-25.0561	4.51594	0.000150889	short
	33	4	-5.31687	11.4847	1.09988e-05	short
	33	5	-18.5376	2.88661	1	long
	33	6	-22.9079	-2.68609	0.999382	long
	34	1	-33.7293	-6.05711	8.27628e-05	short
	34	2	-21.8438	1.22773	0.000505793	short
	34	3	20.9595	-0.719706	3.96995e-09	short
	34	4	-31.2115	-0.541757	1	long
	35	1	-1.92743	5.67414	7.1249e-07	short
	35	2	-16.5363	4.9099	3.21164e-06	short
	35	3	-21.9194	-2.89656	8.27628e-05	short
	35	4	-18.0433	1.42022	4.96291e-06	short
	35	5	-25.0472	-4.06351	4.3049e-05	short
	35	6	-13.3665	-1.52545	8.27628e-05	short
	35	7	-18.2238	3.33749	3.13348e-05	short
	35	8	-7.53444	-6.81339	2.35883e-07	short
	35	9	-14.6811	-3.86251	1.18531e-05	short
	35	10	-15.5641	0.569558	8.08736e-06	short
	35	11	-9.59596	0.675294	1.95936e-05	short
	35	12	-14.1272	5.6874	4.3049e-05	short
	35	13	-21.3423	-2.735	1	long
	35	14	-13.2596	12.3478	1	long
	36	1	7.90279	-3.07892	2.67672e-06	short
	36	2	-7.35114	0.962485	1.65912e-06	short
	36	3	-7.31527	-3.27227	2.48952e-08	short
	36	4	-19.7357	-4.71605	1.65912e-06	short
	36	5	-11.141	0.667547	0.000850003	short
	36	6	-7.19762	1.62433	0.0541832	short
	36	7	-5.22814	6.90069	1	long
	37	1	-0.500445	-2.57875	1.66021e-08	short
	37	2	-2.64488	-27.6355	5.03292e-07	short
	37	3	-9.33796	-14.4471	4.0444e-05	short
	37	4	-17.7084	11.7717	1	long
	37	5	-27.207	-0.470364	1	long
	37	6	-14.3173	5.65371	0.999996	long
	38	1	2.78906	-4.15475	1.27655e-05	short
	38	2	-9.09697	0.0414518	8.74584e-06	short
	38	3	-12.2743	-1.01023	0.0126025	short
	38	4	-11.5376	-0.319378	1	long
	39	1	-42.6341	-0.501024	1	long
	40	1	-4.4616	-0.431444	0.00167913	short
	40	2	-25.8184	10.0256	0.999097	long
	40	3	-15.6597	2.95386	6.56987e-05	short
	40	4	-10.7651	6.78545	0.985201	long
	40	5	-27.0385	-10.6077	1	long
	41	1	0.0736424	-0.82397	8.89384e-07	short
	41	2	-4.91053	-1.05081	6.35856e-07	short
	41	3	-2.15677	-8.15081	2.9338e-06	short
	41	4	-18.8706	-2.92741	0.999999	long
	41	5	-22.214	0.611139	1.37339e-05	short
	41	6	-23.1703	-2.88438	0.001438	short
	41	7	-21.1113	-2.0223	0.999993	long
	41	8	-24.4034	0.632778	0.999993	long
	41	9	-8.21862	-1.45435	1.07284e-08	short
	42	1	-4.72427	3.07213	7.24705e-08	short
	42	2	-15.6855	1.48769	2.21964e-06	short
	42	3	-27.0369	-0.504041	5.39682e-06	short
	42	4	-2.23948	-11.274	2.48952e-08	short
	42	5	-24.5208	-0.985477	1.37339e-05	short
	42	6	-28.8552	9.34535	0.999987	long
	42	7	-11.7238	-0.294258	0.986164	long
	42	8	-22.2288	7.28001	1	long
	43	1	-26.6404	2.4311	1.82751e-05	short
	43	2	-33.1393	-1.85497	0.000238527	short
	43	3	-7.95296	-0.665163	0.000195269	short
	43	4	-20.2338	0.245366	0.999994	long
	43	5	-9.86621	-1.16811	1.70337e-05	short
	43	6	-30.2231	-17.9266	1	long
	44	1	-3.29087	0.037124	3.83515e-06	short
	44	2	-22.1687	-1.52902	1	long
	44	3	4.32564	-0.301735	8.75862e-05	short
	44	4	-4.46363	-0.500552	1	long
	45	1	-19.1124	-3.0129	0.999972	long
	45	2	-11.6352	-0.2826	1	long
	45	3	-18.3588	0.0810151	0.999998	long
	46	1	-5.20111	-8.18323	3.56392e-05	short
	46	2	-25.2035	3.32628	0.000462252	short
	46	3	-16.2224	-2.8099	2.40515e-05	short
	46	4	-33.1903	-2.37552	2.7486e-05	short
	46	5	-6.75262	1.19209	1.79274e-07	short
	46	6	-23.8967	-6.87143	1	long
	46	7	-5.6131	-0.308949	0.999964	long
	47	1	-28.8669	-10.4249	0.000577864	short
	47	2	-5.54578	-6.75405	1.65929e-06	short
	47	3	-25.3538	-0.133657	1.65929e-06	short
	47	4	-38.8416	-12.0911	3.94888e-07	short
	47	5	-25.3375	-35.3671	5.39741e-06	short
	47	6	-23.1659	9.84151	1.22386e-06	short
	47	7	-23.5568	-4.83237	2.93411e-06	short
	47	8	-25.6695	19.4349	1.35667e-06	short
	47	9	-29.4877	4.35379	7.12561e-07	short
	47	10	-37.3414	-0.117825	6.96523e-05	short
	47	11	-22.0129	-14.3201	1.27653e-05	short
	47	12	-30.3163	-6.15051	7.81803e-05	short
	47	13	-22.8351	6.45426	8.74568e-06	short
	47	14	-39.2022	-0.77879	0.0330831	short
	47	15	-28.265	0.249747	0.488848	short
	47	16	-13.6394	2.71925	1.15932e-07	short
	47	17	-33.0317	-0.955585	4.55965e-06	short
	47	18	1.91989	0.970687	8.74568e-06	short
	47	19	-21.6242	0.321508	4.55965e-06	short
	47	20	-29.1517	-0.215007	3.83556e-06	short
	47	21	-19.1623	13.6579	1.55569e-07	short
	47	22	-26.2811	-5.72204	4.04488e-05	short
	47	23	-28.5998	1.66914	7.81803e-05	short
	47	24	-25.3106	-44.822	3.79806e-05	short
	47	25	-33.5996	-0.424721	1.37355e-05	short
	47	26	-43.6377	1.4273	0.998721	long
	47	27	-27.1643	-10.6434	0.999948	long
	47	28	-20.9213	-37.9668	0.999995	long
	48	1	-10.9679	-0.169433	3.06833e-07	short
	48	2	-13.1189	-9.43638	2.69415e-07	short
	48	3	-45.2243	-1.09319	0.0314197	short
	48	4	-35.9853	-11.8832	0.000159009	short
	48	5	-24.015	-0.0942681	9.95308e-08	short
	48	6	-36.6105	18.4167	1.37357e-05	short
	48	7	-31.4885	2.81046	5.66371e-07	short
	48	8	-25.9123	-5.90941	2.74897e-05	short
	48	9	-31.9878	-4.81851	0.000167483	short
	48	10	-28.7296	-15.8121	0.999847	long
	48	11	-9.76317	-15.6291	1.18547e-05	short
	48	12	-27.0433	-12.9239	2.57229e-05	short
	48	13	-24.843	3.08587	1	long
	48	14	-0.0134897	3.53875	4.18432e-06	short
	48	15	-26.4933	3.79168	7.38114e-05	short
	48	16	-36.1282	5.15933	9.44855e-06	short
	49	1	-5.68669	-1.69775	0.00272201	short
	49	2	-30.0827	-0.767605	0.00081508	short
	49	3	-4.40236	0.552751	5.66306e-07	short
	49	4	-5.28143	-1.16502	2.69385e-07	short
	49	5	-13.6732	1.76184	1	long
	49	6	-7.64832	5.96595	1.27638e-05	short
	50	1	-16.0867	16.088	2.74897e-05	short
	50	2	-25.7134	4.48919	4.96353e-06	short
	50	3	-22.4167	5.11858	3.79813e-05	short
	50	4	-39.2844	-2.52044	2.93417e-06	short
	50	5	-26.4615	0.992602	4.55973e-06	short
	50	6	-7.77478	7.4127	1.37357e-05	short
	50	7	-39.1844	-1.87167	0.000185611	short
	50	8	-33.2233	-4.49074	1	long
