# Supplementary material for: Accept–reject decision-making revealed via a quantitative and ethological study of C. elegans foraging
Source: eLife. 2025 Sep 10;13:RP103191. doi: 10.7554/eLife.103191 (PMC12422737; doi:10.7554/eLife.103191)
Supplement: Figure 1—source data 7. [file elife-103191-fig1-data7.xlsx]

## Sheet: Sheet1
Figure 1 - Source Data 7
Figure 1N - Velocity of animals upon encounter with patch edge
Summary Statistics
	# worms	# encounters
	50	419
Source Data
	distance to patch edge (mm)	mean	std	median	2.5%	97.5%		* distance between the animal’s midbody position and the patch edge (positive = inside patch; negative = outside patch)
	-2.5	207.67	39.667	206.875	134.12	295.358		* mean, std, median, and 95% CI of mean velocities (μm/s) of each animal computed every 50 μm
	-2.45	208.799	34.8086	204.922	155.578	292.235
	-2.4	208.888	33.6747	209.483	147.567	277.589
	-2.35	209.573	31.7419	209.061	156.387	295.687
	-2.3	212.729	30.8353	211.131	157.067	281.076
	-2.25	214.082	31.6016	213.696	155.609	273.553
	-2.2	211.655	34.6578	207.105	148.826	282.453
	-2.15	209.785	34.2327	205.643	140.845	280.284
	-2.1	210.039	32.3726	205.222	159.906	279.304
	-2.05	210.77	37.4171	213.34	133.04	279.702
	-2	208.758	41.2591	208.209	113.707	286.902
	-1.95	208.045	36.0093	208.386	136.17	279.278
	-1.9	209.961	34.8286	213.142	146.164	283.125
	-1.85	209.727	35.7955	206.753	134.801	284.707
	-1.8	211.496	35.1416	211.804	149.131	283.007
	-1.75	211.663	32.4675	208.886	154.447	280.455
	-1.7	211.154	32.8168	211.572	146.741	280.822
	-1.65	211.21	32.7969	208.236	149.961	278.35
	-1.6	211.803	33.2419	212.084	145.419	277.683
	-1.55	210.99	32.6805	211.993	157.511	288.545
	-1.5	212.043	35.2087	213.936	142.036	284.5
	-1.45	211.08	34.1574	211.933	146.195	280.066
	-1.4	212.83	35.1309	211.003	150.798	290.111
	-1.35	212.136	32.6914	212.087	155.361	278.859
	-1.3	212.323	33.3642	209.006	154.306	280.562
	-1.25	212.939	33.6108	214.161	154.34	281.058
	-1.2	210.178	31.898	205.331	152.057	285.974
	-1.15	213.056	32.7288	206.499	163.829	281.883
	-1.1	211.183	32.5105	206.778	159.657	279.391
	-1.05	211.571	31.2029	208.121	151.359	280.733
	-1	207.954	30.8483	207.132	156.745	276.622
	-0.95	207.587	29.9995	206.437	162.736	287.043
	-0.9	207.256	30.6976	204.31	153.459	269.655
	-0.85	205.89	31.931	203.764	150.599	272.151
	-0.8	204.382	31.4456	203.897	155.154	281.039
	-0.75	203.476	34.0673	200.023	149.722	290.922
	-0.7	197.885	35.1397	195.408	129.337	279.683
	-0.65	199.203	30.8569	198.411	134.561	273.834
	-0.6	196.626	35.0432	199.238	122.811	274.43
	-0.55	191.433	37.5501	194.402	101.661	260.181
	-0.5	189.122	40.9511	189.432	74.1204	260.196
	-0.45	181.682	40.832	187.434	68.0164	256.241
	-0.4	169.905	43.3495	165.775	66.4609	245.377
	-0.35	159.826	44.1907	158.068	58.5156	233.715
	-0.3	149.088	39.7166	150.627	55.3288	224.901
	-0.25	138.152	39.567	133.142	59.7727	222.689
	-0.2	125.554	38.4261	120.759	54.8025	200.188
	-0.15	114.038	33.8392	113.415	56.2838	190.928
	-0.1	98.8256	32.9881	96.8995	52.4449	178.733
	-0.05	84.3583	25.3589	80.9126	40.8526	136.987
	0	72.3255	16.9018	70.5531	42.2423	103.373
	0.05	55.9193	12.0231	54.8757	36.5666	81.3152
	0.1	50.7808	8.42455	51.1068	35.4753	67.9015
	0.15	50.9004	7.13481	50.024	39.7015	67.2057
	0.2	52.9002	8.14534	51.8543	38.7351	71.0842
	0.25	56.6225	9.52067	56.0064	38.8491	76.4919
	0.3	57.2646	12.1876	55.402	40.5637	88.693
	0.35	58.7092	13.7993	57.1335	40.0447	93.3445
	0.4	61.3485	15.9076	61.629	38.406	107.522
	0.45	64.4255	16.6082	63.8987	39.4038	101.251
	0.5	66.055	19.733	63.4278	40.6225	117
	0.55	69.797	23.779	64.5208	40.9969	133.149
	0.6	74.2261	27.3895	69.2704	40.4187	147.198
	0.65	77.5176	25.8516	76.5481	35.3759	134.2
	0.7	79.3528	29.5717	77.4166	34.7773	141.087
	0.75	76.3458	31.4446	71.9891	29.5978	147.845
