# Supplementary material for: Accept–reject decision-making revealed via a quantitative and ethological study of C. elegans foraging
Source: eLife. 2025 Sep 10;13:RP103191. doi: 10.7554/eLife.103191 (PMC12422737; doi:10.7554/eLife.103191)
Supplement: Figure 1—source data 8. [file elife-103191-fig1-data8.xlsx]

## Sheet: Sheet1
Figure 1 - Source Data 8
Figure 1O - Velocity on and off patch
Summary Statistics
	patch	# worms	mean	std	median	2.5%	97.5%	p value		* mean, std, median, and 95% CI are given in μm/s
	off	50	198.354	30.0649	198.481	141.708	263.366			* p value calculated using one-tailed paired-sample t-test
	on	50	51.8588	6.86156	52.059	39.8054	69.0856	2.12289e-38
Source Data
	worm #	mean velocity off patch (μm/s)	mean velocity on patch (μm/s)	p(off patch)	p(on patch)		* mean velocity computed for each worm across all time points
	1	193.77	44.3921	0.228767	0.722979		* probabilites of residing on and off patch are given for each worm
	2	212.004	53.9565	0.150597	0.736501
	3	182.916	47.4531	0.246735	0.723997
	4	183.456	47.6509	0.279615	0.681486
	5	208.475	52.0313	0.144577	0.670001
	6	196.296	45.5831	0.384922	0.572937
	7	141.945	44.0767	0.159489	0.577105
	8	190.781	43.9805	0.358248	0.562842
	9	199.801	56.8777	0.368714	0.397888
	10	164.812	39.5448	0.338705	0.624988
	11	178.06	50.0355	0.315736	0.648606
	12	146.96	49.7911	0.302955	0.67315
	13	151.246	43.1762	0.737334	0.236918
	14	178.216	55.3303	0.1882	0.779291
	15	185.939	42.9117	0.314717	0.59498
	16	197.9	55.7691	0.474854	0.477818
	17	186.487	39.8923	0.37742	0.584699
	18	213.93	44.6761	0.312402	0.630546
	19	220.031	62.8518	0.467259	0.465129
	20	197.254	58.298	0.352598	0.498009
	21	208.221	52.3625	0.405853	0.560526
	22	200.753	55.7449	0.379457	0.542929
	23	234.391	54.2303	0.271372	0.671575
	24	200.38	52.0868	0.293322	0.633602
	25	202.042	51.9347	0.287858	0.677688
	26	192.678	43.4552	0.210892	0.759841
	27	204.878	51.5009	0.241641	0.722145
	28	215.816	54.8684	0.146893	0.795128
	29	191.94	54.2093	0.264333	0.679726
	30	201.059	47.6055	0.210151	0.749745
	31	216.648	68.7657	0.365784	0.543442
	32	199.061	55.8153	0.380974	0.555761
	33	228.705	58.669	0.22073	0.73731
	34	182.219	45.6779	0.330863	0.597166
	35	168.486	57.6254	0.312031	0.583032
	36	148.264	56.8598	0.426137	0.491896
	37	167.994	53.5345	0.253311	0.711864
	38	188.031	47.8157	0.169769	0.728443
	39	212.864	43.128	0.0488099	0.914606
	40	180.506	57.7915	0.234602	0.708808
	41	153.349	44.6159	0.225803	0.632954
	42	140.997	47.2238	0.10929	0.831527
	43	236.437	51.9255	0.222397	0.753705
	44	212.003	50.5969	0.134216	0.821786
	45	270.705	61.2937	0.254724	0.708688
	46	251.516	52.891	0.293905	0.645146
	47	260.92	70.0452	0.394313	0.485458
	48	229.086	61.0745	0.235272	0.699889
	49	235.067	53.0254	0.394035	0.571508
	50	252.4	58.2864	0.245554	0.692016
