# Supplementary material for: Accept–reject decision-making revealed via a quantitative and ethological study of C. elegans foraging
Source: eLife. 2025 Sep 10;13:RP103191. doi: 10.7554/eLife.103191 (PMC12422737; doi:10.7554/eLife.103191)
Supplement: Figure 2—source data 1. [file elife-103191-fig2-data1.xlsx]

## Sheet: Sheet1
Figure 2 - Source Data 1
Figure 2A - Relative density of bacterial patches in each condition
Summary Statistics
	OD600	growth time (hr)	mean relative density	std relative density	label	saturation		* relative density was estimated as described in methods and Figure 2 - supplement 1-3
	0	1	0.01	0	0	0.8		* bacteria-free patches were assigned a relative density 0.01 for use in log-based calculations
	0.05	1	0.226252	0.0296644	0.2	0.73375		* condition labels use rounded relative density estimates for ease of reading
	0.1	1	0.283734	0.0346372	0.3	0.713375		* saturation gives the grayscale color value from 0 (black) to 1 (white) for each condition
	0.5	1	0.48652	0.0277826	0.5	0.664843
	1	1	1.12995	0.050613	1	0.589005
	2	1	2.23926	0.120609	2	0.527447
	3	1	2.91659	0.160582	3	0.503663
	4	1	5.04816	0.33291	5	0.454288
	5	1	5.87791	0.365822	6	0.440592
	10	1	10	0.720507	10	0.392767
	1	12	53.4889	2.61392	50	0.241847
	1	48	213.259	9.45999	200	0.117375
