# Supplementary material for: Accept–reject decision-making revealed via a quantitative and ethological study of C. elegans foraging
Source: eLife. 2025 Sep 10;13:RP103191. doi: 10.7554/eLife.103191 (PMC12422737; doi:10.7554/eLife.103191)
Supplement: Figure 2—source data 2. [file elife-103191-fig2-data2.xlsx]

## Sheet: Sheet1
Figure 2 - Source Data 2
Figure 2B - Velocity of animals upon encounter with patch edge
Summary Statistics
	label	OD600	growth time (hr)	# worms	saturation		* saturation gives the grayscale color value from 0 (black) to 1 (white) for each condition
	0	0	1	30	0.8
	0.2	0.05	1	23	0.73375
	0.3	0.1	1	25	0.713375
	0.5	0.5	1	35	0.664843
	1	1	1	46	0.589005
	2	2	1	44	0.527447
	3	3	1	48	0.503663
	5	4	1	44	0.454288
	6	5	1	50	0.440592
	10	10	1	50	0.392767
	50	1	12	20	0.241847
	200	1	48	28	0.117375
Source Data
	distance to patch edge (mm)	0	0.2	0.3	0.5	1	2	3	5	6	10	50	200		* distance between the animal’s midbody position and the patch edge (positive = inside patch; negative = outside patch)
	-2.5	173.025	179.426	188.079	183.754	193.164	196.041	194.803	196.95	209.576	207.67	267.272	259.043		* mean of mean velocities (μm/s) of each animal computed every 50 μm
	-2.45	176.289	180.494	187.422	187.766	191.723	192.35	199.614	198.705	211.122	208.799	267.689	229.276
	-2.4	179.244	179.153	188.583	190.199	192.015	190.294	200.942	198.607	211.144	208.888	262.832	240.205
	-2.35	181.968	184.414	190.848	190.814	196.097	187.547	201.633	199.82	207.737	209.573	263.131	257.846
	-2.3	187.387	182.173	193.349	191.444	196.679	190.619	197.318	202.413	207.64	212.729	260.562	243.355
	-2.25	190.894	180.478	193.208	190.572	200.607	194.369	199.909	201.76	210.809	214.082	256.203	230.592
	-2.2	191.866	181.931	194.614	194.984	203.035	194.238	198.62	202.852	214.03	211.655	263.937	234.569
	-2.15	196.004	187.011	190.624	194.314	201.482	194.843	197.989	198.322	212.683	209.785	265.77	191.332
	-2.1	196.41	189.358	194.878	196.397	201.766	195.244	201.528	201.778	215.253	210.039	265.735	197.689
	-2.05	199.165	190.102	193.452	196.173	196.633	194.281	201.826	198.833	216.051	210.77	263.661	194.462
	-2	200.219	188.079	196.262	196.235	197.986	200.126	201.596	200.221	215.396	208.758	257.254	209.626
	-1.95	198.716	189.342	197.519	193.053	198.708	196.317	197.973	200.074	213.293	208.045	254.67	203.576
	-1.9	195.503	192.894	197.223	193.872	200.102	195.73	198.85	201.574	211.501	209.961	255.171	206.692
	-1.85	198.575	190.504	200.479	192.208	201.309	194.697	203.735	203.988	211.439	209.727	258.017	205.177
	-1.8	196.655	192.685	200.232	195.724	201.71	192.229	206.693	200.763	212.384	211.496	254.117	203.567
	-1.75	197.912	192.357	200.821	197.104	199.73	196.092	208.312	204.253	211.819	211.663	257.259	216.644
	-1.7	199.351	193.398	198.438	197.672	202.973	195.635	207.607	206.723	212.743	211.154	256.741	202.582
	-1.65	200.379	193.077	198.1	199.262	202.585	198.069	208.685	205.103	210.627	211.21	254.643	206.784
	-1.6	201.061	196.206	201.036	199.538	204.562	195.847	207.018	205.852	209.132	211.803	248.312	220.775
	-1.55	199.915	195.847	201.138	201.112	205.025	198.448	209.844	207.276	209.556	210.99	253.281	206.376
	-1.5	201.777	196.957	202.625	201.552	208.584	197.048	209.091	210.126	216.245	212.043	252.507	218.217
	-1.45	206.709	199.743	203.609	204.105	207.836	199.531	208.358	208.726	214.698	211.08	246.15	205.599
	-1.4	207.999	201.216	203.74	202.861	208.13	201.207	209.536	206.705	213.112	212.83	252.421	219.133
	-1.35	208.922	200.037	205.612	204.998	208.081	201.556	209.487	207.277	213.343	212.136	245.422	207.952
	-1.3	207.265	202.071	207.475	205.469	208.018	200.518	209.805	208.936	214.215	212.323	254.148	209.49
	-1.25	207.765	203.038	207.783	204.918	208.631	200.252	209.181	206.43	215.114	212.939	248.689	197.471
	-1.2	209.416	205.018	208.477	204.804	207.887	200.661	208.45	204.544	213.472	210.178	247.576	209.633
	-1.15	209.994	203.79	207.185	204.377	206.947	199.507	208.218	202.721	211.638	213.056	257.623	208.363
	-1.1	210.134	203.618	208.13	204.209	205.992	199.464	207.582	204.605	211.625	211.183	254.482	205.387
	-1.05	211.826	205.377	208.95	204.256	206.493	200.168	205.199	204.364	211.475	211.571	253.478	201.989
	-1	210.289	204.428	208.709	203.105	204.851	196.277	204.592	202.6	207.812	207.954	251.206	209.391
	-0.95	210.967	203.868	209.727	202.5	204.377	194.074	204.887	204.246	208.412	207.587	257.958	207.033
	-0.9	212.973	204.069	209.857	202.366	202.869	195.228	202.034	204.31	206.64	207.256	255.616	207.792
	-0.85	212.121	201.868	212.176	202.217	200.183	193.937	201.154	202.866	205.945	205.89	257.805	197.932
	-0.8	211.82	201.873	210.284	202.056	199.115	191.437	200.218	201.524	207.098	204.382	253.946	196.086
	-0.75	212.626	202.378	210.491	199.956	199.759	188.968	201.116	200.22	202.255	203.476	246.087	192.676
	-0.7	210.945	200.68	211.583	198.219	197.712	186.375	197.617	196.112	202.496	197.885	254.497	181.687
	-0.65	212.212	201.649	211.117	197.94	193.574	179.716	195.79	190.317	199.143	199.203	243.125	192.313
	-0.6	211.821	201.936	213.026	194.39	191.702	176.15	193.768	185.174	198.374	196.626	242.612	177.488
	-0.55	212.112	202.871	210.391	190.678	188.17	170.908	188.564	182.261	191.619	191.433	236.085	165.344
	-0.5	213.926	203.71	211.73	190.75	182.124	163.714	181.824	175.647	188.824	189.122	239.08	164.646
	-0.45	212.544	204.818	211.756	189.792	179.555	157.615	180.548	171.201	176.16	181.682	226.679	157.054
	-0.4	212.599	204.319	211.528	184.055	172.273	149.478	169.569	165.252	172.114	169.905	210.898	145.347
	-0.35	211.992	201.465	209.024	179.898	165.507	143.784	162.198	153.733	162.529	159.826	212.613	150.307
	-0.3	211.682	202.348	206.964	172.99	157.015	132.555	150.129	142.032	154.038	149.088	195.306	138.351
	-0.25	211.333	203.564	206.901	171.557	152.489	126.032	144.02	134.986	145.064	138.152	175.508	119.312
	-0.2	209.668	201.245	204.816	169.039	143.389	119.056	128.327	125.277	127.771	125.554	157.069	107.812
	-0.15	210.987	200.63	205.439	162.236	132.056	110.39	116.043	117.623	116.683	114.038	143.114	97.2133
	-0.1	209.805	198.191	206.833	148.046	120.357	104	106.249	110.515	114.177	98.8256	134.645	80.6038
	-0.05	209.787	200.343	204.919	140.255	108.985	90.3763	93.4429	97.2601	95.5669	84.3583	117.909	70.8249
	0	207.71	200.634	204.62	134.353	101.683	81.9314	88.4497	86.8484	78.6071	72.3255	95.3334	69.0399
	0.05	207.835	199.704	201.406	126.767	94.9689	74.5297	75.3135	76.858	71.3143	55.9193	73.0881	65.7641
	0.1	210.173	197.12	196.843	122.908	94.4243	71.8203	75.6186	71.5009	66.8849	50.7808	64.1142	64.5056
	0.15	210.762	198.024	200.185	123.044	91.5253	70.5829	74.5842	72.9602	68.3762	50.9004	62.1781	63.9571
	0.2	210.419	195.348	200.247	122.744	88.4486	72.8115	75.2384	73.9321	69.8516	52.9002	64.3311	62.9557
	0.25	212.342	197.675	199.798	123.929	87.6745	70.6577	76.6655	75.4568	72.6123	56.6225	69.8375	61.8342
	0.3	213.987	195.698	200.451	121.702	88.214	71.5935	79.2363	79.1368	72.6586	57.2646	79.1972	60.8456
	0.35	209.797	195.565	199.981	127.578	88.1103	75.4637	78.9697	78.6972	70.5663	58.7092	82.8172	62.875
	0.4	210.853	195.37	198.126	128.863	92.3676	78.287	79.9431	81.0367	73.952	61.3485	81.9215	65.9988
	0.45	211.341	194.885	199.611	125.238	95.9345	79.5363	81.7992	83.6762	77.9941	64.4255	83.0232	63.7492
	0.5	210.184	194.722	194.205	130.285	99.1416	85.1223	84.9331	84.2363	77.7936	66.055	84.115	60.9233
	0.55	210.212	195.964	202.257	132.058	102.707	88.8239	89.8334	89.4534	78.6506	69.797	90.5905	63.8984
	0.6	209.697	193.241	204.253	138.783	107.007	92.5494	92.7247	93.1939	80.6112	74.2261	86.7497	61.8917
	0.65	212.02	194.253	202.177	141.526	108.682	96.7172	94.1966	94.8747	82.8637	77.5176	87.5764	61.6763
	0.7	215.662	199.343	200.005	146.735	119.473	98.0374	97.3495	98.4137	87.2708	79.3528	91.0718	60.95
	0.75	217.918	203.698	204.181	150.287	115.328	102.898	107.945	101.852	91.0735	76.3458	87.8386	62.3407
