# Supplementary material for: Accept–reject decision-making revealed via a quantitative and ethological study of C. elegans foraging
Source: eLife. 2025 Sep 10;13:RP103191. doi: 10.7554/eLife.103191 (PMC12422737; doi:10.7554/eLife.103191)
Supplement: Figure 2—source data 3. [file elife-103191-fig2-data3.xlsx]

## Sheet: Sheet1
Figure 2 - Source Data 3
Figure 2C - Velocity on patch
Summary Statistics
	label	OD600	growth time (hr)	relative density	# worms	saturation	mean velocity on patch (μm/s)	p value		* mean of mean velocity (μm/s) on patch for each animal
	0	0	1	0.01	30	0.8	210.131			* p value calculated by comparing to 0 condition (i.e. bacteria-free patch) using one-tailed Mann Whitney U-Test with Bonferroni Correction for multiple comparisons
	0.2	0.05	1	0.226252	23	0.73375	196.862	1.61838
	0.3	0.1	1	0.283734	25	0.713375	199.697	1.93648
	0.5	0.5	1	0.48652	35	0.664843	122.986	1.08779e-06
	1	1	1	1.12995	46	0.589005	87.1964	2.09245e-12
	2	2	1	2.23926	44	0.527447	68.3568	6.07749e-12
	3	3	1	2.91659	48	0.503663	70.9006	5.47087e-12
	5	4	1	5.04816	44	0.454288	72.6797	2.46233e-10
	6	5	1	5.87791	50	0.440592	65.9144	4.48921e-12
	10	10	1	10	50	0.392767	51.8588	5.66055e-13
	50	1	12	53.4889	20	0.241847	64.6952	1.80675e-08
	200	1	48	213.259	28	0.117375	62.1455	4.00854e-10
Sigmoid (y = d + (a-d)/(1 + (x/c)^b)
	a	b	c	d	r-squared
	64.6495	-15.2399	2.62048	214.251	0.69813
Source Data
	worm #	label	mean velocity on patch (μm/s)	p(on patch)		* mean velocity computed for each worm across all time points
	1	2	64.7917	0.325646		* probability of residing on patch is given for each worm
	2	2	50.7873	0.631564
	3	2	46.4196	0.326294
	4	2	49.6292	0.553117
	5	6	43.3836	0.640422
	6	6	49.9834	0.502223
	7	6	54.9457	0.674509
	8	6	59.8318	0.633012
	9	10	44.3921	0.722979
	10	10	53.9565	0.736501
	11	10	47.4531	0.723997
	12	10	47.6509	0.681486
	13	0	192.763	0.0709522
	14	0	219.359	0.047425
	15	0.2	176.241	0.0288043
	16	0.2	167.38	0.0128739
	17	0.2	205.324	0.00731685
	18	5	122.814	0.0455682
	19	5	46.2595	0.205427
	20	5	57.5185	0.346763
	21	5	51.3986	0.413633
	22	3	61.9013	0.453274
	23	3	50.9438	0.415023
	24	3	62.3002	0.188293
	25	3	67.0474	0.268037
	26	5	128.063	0.0652959
	27	5	53.0692	0.399555
	28	5	78.5185	0.0876169
	29	3	112.74	0.0600222
	30	3	69.5249	0.147833
	31	3	76.5058	0.144035
	32	3	51.9765	0.296869
	33	6	63.441	0.40289
	34	6	56.7034	0.630823
	35	6	56.9868	0.68908
	36	6	47.5054	0.508382
	37	0.5	125.27	0.116895
	38	0.5	101.916	0.14246
	39	0.5	141.701	0.0461282
	40	0.5	109.438	0.112449
	41	0	176.805	0.0965083
	42	0	199.589	0.0372326
	43	0	202.264	0.0583495
	44	0	203.413	0.0578864
	45	10	52.0313	0.670001
	46	10	45.5831	0.572937
	47	10	44.0767	0.577105
	48	10	43.9805	0.562842
	49	1	67.6612	0.458183
	50	1	57.2109	0.495971
	51	1	76.1437	0.211448
	52	1	74.887	0.408262
	53	0.3	161.188	0.138755
	54	0.3	197.545	0.0745647
	55	0.3	197.128	0.0995739
	56	0.3	188.551	0.0726195
	57	2	68.2663	0.415432
	58	2	63.6911	0.512968
	59	2	75.6319	0.219896
	60	2	58.6666	0.544368
	61	3	54.371	0.0647462
	62	0.2	148.641	0.0690236
	63	10	56.8777	0.397888
	64	0	169.769	0.0268593
	65	5	57.2596	0.311753
	66	0.3	125.081	0.10967
	67	1	59.5539	0.460961
	68	0.5	82.8669	0.14856
	69	2	51.6303	0.296221
	70	6	50.4209	0.461189
	71	2	50.6101	0.122997
	72	2	45.2682	0.162453
	73	2	55.6604	0.261647
	74	2	69.7354	0.112624
	75	0.3	192.568	0.0279707
	76	0.3	214.901	0.0263036
	77	0.3	185.349	0.0651107
	78	0.2	145.924	0.0599241
	79	0.2	204.226	0.0271372
	80	3	52.6238	0.545151
	81	3	40.2185	0.738909
	82	3	57.3221	0.478096
	83	3	52.0808	0.648236
	84	0.5	81.4522	0.171714
	85	0.5	70.4417	0.353154
	86	0.5	71.9748	0.255534
	87	0.5	61.6296	0.329536
	88	5	43.3654	0.561637
	89	5	55.4908	0.464851
	90	5	58.6843	0.436881
	91	5	55.9071	0.5207
	92	6	40.3409	0.521071
	93	6	44.2032	0.533111
	94	6	52.8084	0.598129
	95	1	63.0361	0.632213
	96	1	43.5994	0.39511
	97	1	60.6595	0.430583
	98	1	79.6869	0.324812
	99	10	39.5448	0.624988
	100	10	50.0355	0.648606
	101	10	49.7911	0.67315
	102	10	43.1762	0.236918
	103	2	58.0883	0.405113
	104	2	47.2846	0.346485
	105	1	57.6606	0.405298
	106	1	51.9471	0.252755
	107	1	47.296	0.60665
	108	1	66.2853	0.187367
	109	0	171.276	0.024266
	110	0	168.183	0.0471427
	111	0	175.094	0.0232472
	112	0	161.798	0.0410299
	113	5	48.6391	0.540015
	114	3	51.5949	0.574697
	115	3	55.2674	0.442901
	116	3	53.647	0.558766
	117	3	60.1045	0.316662
	118	0.3	159.207	0.0383475
	119	0.3	174.428	0.0360319
	120	0.5	80.4274	0.190979
	121	0.5	191.119	0.0310271
	122	10	55.3303	0.779291
	123	6	45.9493	0.473094
	124	6	49.7055	0.33463
	125	6	48.2929	0.487265
	126	6	48.758	0.738909
	127	0.2	155.713	0.0636347
	128	0.2	203.047	0.0632642
	129	1	96.4918	0.146337
	130	1	51.9361	0.482264
	131	1	55.4968	0.437899
	132	1	55.0563	0.272761
	133	10	42.9117	0.59498
	134	10	55.7691	0.477818
	135	10	39.8923	0.584699
	136	10	44.6761	0.630546
	137	3	45.045	0.490274
	138	3	55.892	0.38468
	139	3	44.5562	0.503983
	140	3	65.9834	0.321045
	141	5	45.185	0.164783
	142	5	48.5019	0.652834
	143	2	71.5598	0.220987
	144	6	40.2312	0.424377
	145	6	48.0541	0.653144
	146	6	53.6717	0.656849
	147	0.5	79.4948	0.427936
	148	0.5	82.021	0.269359
	149	0.5	74.9404	0.434513
	150	2	54.7961	0.364175
	151	2	49.8916	0.351116
	152	2	64.9895	0.199407
	153	2	53.0255	0.368806
	154	1	53.1601	0.620265
	155	1	133.043	0.0758544
	156	1	75.2523	0.201815
	157	5	66.55	0.537514
	158	5	55.6712	0.427658
	159	5	66.0173	0.415432
	160	5	52.0922	0.694053
	161	3	60.5857	0.367232
	162	3	72.2024	0.491896
	163	3	68.3703	0.391868
	164	3	60.2182	0.529221
	165	0.3	195.827	0.120404
	166	0.5	74.1076	0.204686
	167	0.5	80.8745	0.15245
	168	0.5	108.961	0.11707
	169	10	62.8518	0.465129
	170	10	58.298	0.498009
	171	10	52.3625	0.560526
	172	10	55.7449	0.542929
	173	6	60.8601	0.117625
	174	6	114.759	0.153654
	175	6	57.8935	0.377605
	176	6	76.0701	0.309623
	177	0.2	208.449	0.102387
	178	1	67.79	0.355317
	179	1	149.894	0.104391
	180	1	146.541	0.134124
	181	1	88.1568	0.170526
	182	10	54.2303	0.671575
	183	10	52.0868	0.633602
	184	10	51.9347	0.677688
	185	10	43.4552	0.759841
	186	3	54.8893	0.431972
	187	3	63.2714	0.403631
	188	3	94.4944	0.236732
	189	3	69.5704	0.475966
	190	5	57.7356	0.387237
	191	2	80.237	0.307308
	192	2	73.2934	0.224136
	193	2	108.216	0.152635
	194	2	85.4625	0.366028
	195	6	74.3897	0.401964
	196	6	48.2018	0.685098
	197	6	46.7105	0.453552
	198	0	218.383	0.0813189
	199	0	170.724	0.0764101
	200	0	210.269	0.0710383
	201	0.5	155.111	0.0956094
	202	0.2	217.155	0.0640052
	203	0.2	208.239	0.0677103
	204	0.2	192.886	0.0584476
	205	5	46.8815	0.52033
	206	5	60.108	0.417431
	207	5	58.8317	0.359174
	208	5	57.0922	0.417894
	209	10	51.5009	0.722145
	210	10	54.8684	0.795128
	211	10	54.2093	0.679726
	212	10	47.6055	0.749745
	213	3	102.277	0.136242
	214	3	89.176	0.20552
	215	3	56.4525	0.395295
	216	3	63.2975	0.401871
	217	0.5	146.885	0.0935445
	218	0.5	97.2105	0.386404
	219	0.5	86.56	0.263499
	220	0.5	77.8658	0.278966
	221	0	179.373	0.069649
	222	1	75.8284	0.276188
	223	1	76.4425	0.250255
	224	2	100.075	0.189127
	225	2	67.6746	0.195795
	226	2	66.3153	0.229138
	227	2	58.1839	0.361767
	228	6	65.5322	0.274891
	229	6	53.3334	0.591646
	230	6	58.2486	0.490877
	231	6	49.3546	0.718903
	232	200	60.2032	0.977309
	233	200	56.0034	0.996295
	234	200	67.3343	0.574789
	235	200	66.9697	1
	236	200	65.928	0.998796
	237	200	62.6624	0.987867
	238	200	57.3214	0.929888
	239	200	64.891	0.989534
	240	2	72.1327	0.206817
	241	2	51.1283	0.639529
	242	2	54.4331	0.515421
	243	2	55.997	0.682597
	244	0	195.274	0.0619617
	245	0	203.309	0.0464944
	246	0	189.744	0.0676114
	247	0	211.215	0.0639993
	248	0.3	182.497	0.090766
	249	0.3	205.436	0.0647402
	250	0.3	200.443	0.0949338
	251	0.2	186.151	0.0257479
	252	0.2	206.245	0.0392702
	253	0.2	233.171	0.0569603
	254	3	54.4823	0.607206
	255	3	67.0974	0.27554
	256	3	55.272	0.549782
	257	0.5	191.365	0.0318607
	258	0.5	235.875	0.0528851
	259	5	62.5361	0.33957
	260	5	87.8679	0.259355
	261	5	56.3281	0.578918
	262	5	66.4287	0.400148
	263	6	52.3397	0.508336
	264	6	56.8016	0.546036
	265	6	58.3341	0.582253
	266	6	64.2792	0.510467
	267	1	123.591	0.13894
	268	1	133.067	0.104761
	269	1	99.1316	0.234346
	270	1	65.0095	0.381715
	271	10	68.7657	0.543442
	272	10	55.8153	0.555761
	273	10	58.669	0.73731
	274	10	45.6779	0.597166
	275	6	66.3047	0.427711
	276	6	53.6852	0.583125
	277	6	53.9336	0.690747
	278	6	65.9602	0.49097
	279	6	45.3305	0.475595
	280	6	56.0825	0.667778
	281	6	59.7421	0.186811
	282	6	62.042	0.26776
	283	5	56.2666	0.562101
	284	5	53.8837	0.4793
	285	5	67.356	0.404186
	286	5	56.179	0.505418
	287	5	59.5492	0.471798
	288	5	52.3479	0.797258
	289	5	48.025	0.81217
	290	5	55.8894	0.668797
	291	200	59.4335	1
	292	200	61.0511	0.869038
	293	200	59.7757	0.892748
	294	200	57.2269	0.979346
	295	200	68.8846	0.827359
	296	200	63.943	0.88256
	297	200	66.3659	0.942299
	298	200	66.032	0.950449
	299	1	107.154	0.148838
	300	1	108.7	0.114106
	301	1	64.228	0.341206
	302	1	70.12	0.53589
	303	1	151.753	0.121249
	304	1	124.685	0.143386
	305	1	100.044	0.193034
	306	1	78.6984	0.261393
	307	0	190.713	0.0702973
	308	0	213.825	0.0576086
	309	0	231.455	0.0784477
	310	10	57.6254	0.583032
	311	10	56.8598	0.491896
	312	10	53.5345	0.711864
	313	10	47.8157	0.728443
	314	10	43.128	0.914606
	315	10	57.7915	0.708808
	316	10	44.6159	0.632954
	317	10	47.2238	0.831527
	318	3	65.4904	0.273687
	319	3	57.4516	0.523571
	320	3	55.9594	0.294248
	321	3	57.6519	0.539502
	322	0.2	170.519	0.0633509
	323	0.2	184.478	0.051681
	324	0.2	176.895	0.0620543
	325	0.2	194.449	0.0986385
	326	2	55.6257	0.57942
	327	2	50.3695	0.454663
	328	2	80.3807	0.368528
	329	2	58.8388	0.558025
	330	0.3	245.097	0.0711309
	331	0.3	144.376	0.0707604
	332	0.3	130.417	0.0779846
	333	0.3	150.719	0.0851162
	334	200	66.5693	0.892563
	335	200	63.2878	0.929795
	336	200	59.7115	0.983329
	337	200	63.6397	0.981939
	338	200	60.003	0.99648
	339	200	59.4417	0.985643
	340	200	61.6229	0.973046
	341	200	52.7725	1
	342	0.5	198.854	0.0869767
	343	0.5	165.824	0.0559466
	344	0.5	112.84	0.108096
	345	0.5	150.971	0.0841052
	346	2	104.189	0.1882
	347	2	53.1996	0.508104
	348	2	62.1964	0.409929
	349	2	66.016	0.473187
	350	0.2	221.916	0.0717792
	351	0.2	230.381	0.0702047
	352	0.2	260.012	0.0740947
	353	0.2	230.386	0.0844679
	354	50	72.0431	0.961745
	355	50	69.4235	0.945535
	356	50	67.552	0.965358
	357	50	62.0126	0.969155
	358	0.3	274.481	0.0561319
	359	0.3	278.093	0.040478
	360	0.3	234.252	0.087625
	361	0.3	283.157	0.0607632
	362	5	66.9243	0.419322
	363	5	49.051	0.467025
	364	5	59.6015	0.534457
	365	5	66.2487	0.605965
	366	50	54.2002	0.933407
	367	50	62.9341	0.899231
	368	50	53.4613	0.896267
	369	50	56.4329	0.867556
	370	6	55.8817	0.716284
	371	6	53.8384	0.592349
	372	6	48.1487	0.630882
	373	6	51.9117	0.646073
	374	1	172.131	0.0521441
	375	1	141.748	0.0673335
	376	1	104.298	0.131148
	377	1	88.4703	0.267389
	378	0.5	233.099	0.0580771
	379	0.5	178.774	0.0703038
	380	0.5	222.529	0.0973509
	381	0.5	218.796	0.0568729
	382	0	235.037	0.092349
	383	0	286.971	0.0719711
	384	0	247.262	0.0482586
	385	0	246.082	0.0611338
	386	3	58.798	0.687598
	387	3	71.4768	0.469297
	388	3	71.7069	0.4931
	389	3	65.5423	0.601278
	390	10	51.9255	0.753705
	391	10	50.5969	0.821786
	392	10	61.2937	0.708688
	393	10	52.891	0.645146
	394	200	57.2746	0.81004
	395	200	58.8114	0.924146
	396	200	69.9007	0.919144
	397	200	63.0139	0.912661
	398	50	56.0184	0.921452
	399	50	57.3637	0.829011
	400	50	60.9467	0.832623
	401	50	60.529	0.893572
	402	2	79.9722	0.400574
	403	2	199.294	0.0878948
	404	2	73.0795	0.257016
	405	2	100.967	0.165602
	406	0	230.148	0.0900333
	407	0	282.036	0.0584476
	408	0	256.654	0.0858651
	409	0	265.134	0.0753057
	410	0.3	218.75	0.0913217
	411	0.3	242.464	0.070853
	412	0.3	210.478	0.0801148
	413	50	72.3597	0.981845
	414	50	73.6443	0.951649
	415	50	96.2608	0.918674
	416	50	61.0513	0.995183
	417	0.5	78.6002	0.282234
	418	0.5	67.5429	0.20767
	419	0.5	67.1554	0.31206
	420	3	183.972	0.0491803
	421	3	209.632	0.0725201
	422	3	77.2168	0.284801
	423	3	155.028	0.0773363
	424	50	58.1941	0.983142
	425	50	65.4911	0.994442
	426	50	64.8029	0.975639
	427	50	69.1822	0.961467
	428	5	199.606	0.075947
	429	5	86.1045	0.282301
	430	5	241.955	0.0830786
	431	5	234.104	0.0927109
	432	6	200.341	0.0779918
	433	6	201.801	0.0561319
	434	6	164.111	0.119118
	435	6	164.28	0.0656725
	436	1	99.5357	0.221193
	437	1	90.9697	0.293998
	438	1	72.8555	0.26973
	439	1	84.126	0.319192
	440	10	70.0452	0.485458
	441	10	61.0745	0.699889
	442	10	53.0254	0.571508
	443	10	58.2864	0.692016
