# Supplementary material for: Accept–reject decision-making revealed via a quantitative and ethological study of C. elegans foraging
Source: eLife. 2025 Sep 10;13:RP103191. doi: 10.7554/eLife.103191 (PMC12422737; doi:10.7554/eLife.103191)
Supplement: Figure 2—source data 4. [file elife-103191-fig2-data4.xlsx]

## Sheet: Sheet1
Figure 2 - Source Data 4
Figure 2E - Time on patch
Summary Statistics
	label	OD600	growth time (hr)	relative density	# worms	saturation	mean time on patch (min)	τ	p value		* mean of mean time on patch (min) for each animal
	0	0	1	0.01	30	0.8	6.76611	0.632839	1.10765e-87		* p value calculated using Kendall's τ rank correlation coefficient (test of monotonicity)
	0.2	0.05	1	0.226252	23	0.73375	6.2026
	0.3	0.1	1	0.283734	25	0.713375	7.81896
	0.5	0.5	1	0.48652	35	0.664843	14.9065
	1	1	1	1.12995	46	0.589005	23.48
	2	2	1	2.23926	44	0.527447	29.2152
	3	3	1	2.91659	48	0.503663	29.2225
	5	4	1	5.04816	44	0.454288	30.9369
	6	5	1	5.87791	50	0.440592	34.5927
	10	10	1	10	50	0.392767	42.4806
	50	1	12	53.4889	20	0.241847	57.7944
	200	1	48	213.259	28	0.117375	59.4896
Sigmoid (y = d + (a-d)/(1 + (x/c)^b)
	a	b	c	d	r-squared
	6.34577	6.30328	3.58049	60	0.724034
Source Data
	worm #	label	time on patch (min)		* mean time on patch computed for each worm across all time points
	1	2	21.6123		* probability of residing on patch is given for each worm
	2	2	38.7287
	3	2	22.9349
	4	2	39.0343
	5	6	38.9843
	6	6	31.8432
	7	6	43.4857
	8	6	47.2813
	9	10	46.3522
	10	10	51.0535
	11	10	44.8906
	12	10	43.3902
	13	0	7.56328
	14	0	5.05701
	15	0.2	3.75672
	16	0.2	1.95616
	17	0.2	1.07811
	18	5	4.51796
	19	5	24.7627
	20	5	33.5318
	21	5	30.4143
	22	3	28.9979
	23	3	38.7898
	24	3	15.5715
	25	3	22.4903
	26	5	7.93005
	27	5	34.2042
	28	5	10.5586
	29	3	6.46311
	30	3	11.5591
	31	3	21.3066
	32	3	21.5289
	33	6	37.8331
	34	6	46.7134
	35	6	48.7418
	36	6	34.9711
	37	0.5	11.0312
	38	0.5	13.2986
	39	0.5	6.31863
	40	0.5	10.2198
	41	0	10.1309
	42	0	3.84008
	43	0	7.54123
	44	0	5.69621
	45	10	51.1035
	46	10	36.6939
	47	10	51.6426
	48	10	39.189
	49	1	33.9994
	50	1	36.7614
	51	1	16.9052
	52	1	30.5706
	53	0.3	13.2538
	54	0.3	8.11344
	55	0.3	11.2477
	56	0.3	7.22985
	57	2	34.7385
	58	2	34.783
	59	2	16.3384
	60	2	49.7988
	61	3	18.2552
	62	0.2	6.77988
	63	10	37.2162
	64	0	2.95647
	65	5	23.3011
	66	0.3	10.281
	67	1	30.5032
	68	0.5	13.0263
	69	2	32.8038
	70	6	29.3035
	71	2	10.3251
	72	2	39.5723
	73	2	42.8955
	74	2	11.2032
	75	0.3	3.89
	76	0.3	3.36207
	77	0.3	7.02979
	78	0.2	6.34639
	79	0.2	3.51775
	80	3	39.0668
	81	3	48.3527
	82	3	39.8892
	83	3	41.3063
	84	0.5	14.0932
	85	0.5	23.6072
	86	0.5	18.1056
	87	0.5	21.5844
	88	5	37.2051
	89	5	35.2823
	90	5	27.669
	91	5	35.4379
	92	6	32.71
	93	6	34.2605
	94	6	41.9129
	95	1	43.2235
	96	1	27.6746
	97	1	28.0747
	98	1	21.9118
	99	10	39.551
	100	10	40.8681
	101	10	41.7517
	102	10	15.4603
	103	2	38.7778
	104	2	34.1431
	105	1	27.9475
	106	1	21.9567
	107	1	44.6748
	108	1	17.372
	109	0	3.0342
	110	0	5.74053
	111	0	3.37875
	112	0	4.62355
	113	5	33.777
	114	3	41.0729
	115	3	28.5026
	116	3	37.1106
	117	3	21.1616
	118	0.3	5.0738
	119	0.3	4.09571
	120	0.5	14.732
	121	0.5	3.97892
	122	10	48.337
	123	6	32.676
	124	6	24.8182
	125	6	32.7649
	126	6	49.1419
	127	0.2	7.95784
	128	0.2	7.46881
	129	1	14.8824
	130	1	38.1118
	131	1	35.1998
	132	1	21.4289
	133	10	40.934
	134	10	30.8922
	135	10	37.3274
	136	10	40.4894
	137	3	43.5968
	138	3	28.8145
	139	3	38.6175
	140	3	28.3643
	141	5	28.147
	142	5	42.9845
	143	2	17.1942
	144	6	37.7942
	145	6	46.9301
	146	6	40.7672
	147	0.5	33.5215
	148	0.5	21.7067
	149	0.5	32.11
	150	2	27.9914
	151	2	23.8013
	152	2	26.8466
	153	2	26.7743
	154	1	45.3085
	155	1	7.66349
	156	1	22.6793
	157	5	36.2223
	158	5	38.2841
	159	5	27.1362
	160	5	44.7861
	161	3	29.225
	162	3	38.0831
	163	3	30.3087
	164	3	37.3607
	165	0.3	12.4539
	166	0.5	17.3661
	167	0.5	15.9046
	168	0.5	11.6144
	169	10	31.1874
	170	10	39.3233
	171	10	35.1331
	172	10	37.6394
	173	6	18.672
	174	6	12.2424
	175	6	25.2961
	176	6	28.2136
	177	0.2	9.74724
	178	1	34.4607
	179	1	10.4143
	180	1	13.2597
	181	1	19.4949
	182	10	43.6514
	183	10	42.0176
	184	10	42.3899
	185	10	47.1635
	186	3	35.3387
	187	3	30.6539
	188	3	20.3619
	189	3	33.4381
	190	5	30.0808
	191	2	24.2408
	192	2	16.0994
	193	2	12.7984
	194	2	25.7858
	195	6	28.9645
	196	6	43.608
	197	6	35.8222
	198	0	8.74695
	199	0	7.97451
	200	0	7.39656
	201	0.5	9.12505
	202	0.2	5.85723
	203	0.2	6.85752
	204	0.2	5.87391
	205	5	40.8849
	206	5	29.9815
	207	5	28.6089
	208	5	28.9367
	209	10	45.2908
	210	10	50.7312
	211	10	43.4402
	212	10	47.2524
	213	3	12.5372
	214	3	20.7342
	215	3	31.9155
	216	3	29.9537
	217	0.5	8.97479
	218	0.5	31.9314
	219	0.5	19.7056
	220	0.5	19.6556
	221	0	8.13586
	222	1	23.6901
	223	1	21.2394
	224	2	18.5057
	225	2	17.7055
	226	2	29.3369
	227	2	28.3532
	228	6	21.3955
	229	6	38.1285
	230	6	33.2714
	231	6	55.6728
	232	200	59.995
	233	200	59.995
	234	200	59.995
	235	200	59.995
	236	200	59.9964
	237	200	59.9964
	238	200	59.9964
	239	200	59.9964
	240	2	32.9094
	241	2	44.4461
	242	2	40.2338
	243	2	46.2299
	244	0	7.29671
	245	0	4.90708
	246	0	6.62428
	247	0	6.74654
	248	0.3	10.2418
	249	0.3	6.44629
	250	0.3	9.5972
	251	0.2	3.28435
	252	0.2	4.10127
	253	0.2	6.5298
	254	3	41.8509
	255	3	20.9949
	256	3	39.967
	257	0.5	3.52887
	258	0.5	5.86293
	259	5	22.9288
	260	5	19.1722
	261	5	38.9278
	262	5	28.3915
	263	6	33.666
	264	6	36.528
	265	6	39.0399
	266	6	33.7938
	267	1	15.0599
	268	1	10.5753
	269	1	20.6281
	270	1	37.9942
	271	10	38.6175
	272	10	36.4057
	273	10	46.6256
	274	10	39.8179
	275	6	31.5535
	276	6	44.2738
	277	6	45.4853
	278	6	32.8816
	279	6	34.5607
	280	6	45.9754
	281	6	27.9309
	282	6	21.0954
	283	5	41.762
	284	5	38.5555
	285	5	29.5251
	286	5	36.1548
	287	5	31.5487
	288	5	49.2653
	289	5	53.1387
	290	5	43.4079
	291	200	59.995
	292	200	59.3448
	293	200	59.6115
	294	200	59.995
	295	200	57.8124
	296	200	57.3733
	297	200	58.8071
	298	200	59.3684
	299	1	15.7434
	300	1	11.0587
	301	1	29.2973
	302	1	37.8664
	303	1	12.3705
	304	1	18.2779
	305	1	19.0392
	306	1	23.1905
	307	0	8.34684
	308	0	6.29069
	309	0	8.14678
	310	10	40.5672
	311	10	34.1487
	312	10	44.824
	313	10	49.8921
	314	10	57.2066
	315	10	45.7697
	316	10	47.3425
	317	10	53.1331
	318	3	23.6623
	319	3	35.2157
	320	3	29.0472
	321	3	35.199
	322	0.2	9.48072
	323	0.2	5.25719
	324	0.2	5.89072
	325	0.2	10.1365
	326	2	41.1683
	327	2	38.3452
	328	2	33.8327
	329	2	41.5018
	330	0.3	7.66331
	331	0.3	6.86308
	332	0.3	8.58579
	333	0.3	7.85781
	334	200	59.995
	335	200	59.1503
	336	200	59.995
	337	200	59.5337
	338	200	59.9908
	339	200	59.3573
	340	200	59.9908
	341	200	59.9908
	342	0.5	8.13011
	343	0.5	6.39072
	344	0.5	10.0251
	345	0.5	8.68582
	346	2	15.8767
	347	2	34.2597
	348	2	31.8368
	349	2	34.0985
	350	0.2	6.71873
	351	0.2	8.23586
	352	0.2	7.89687
	353	0.2	7.93021
	354	50	59.7503
	355	50	58.9723
	356	50	58.9889
	357	50	59.0334
	358	0.3	6.17967
	359	0.3	4.12904
	360	0.3	9.86969
	361	0.3	6.87989
	362	5	38.3553
	363	5	47.5579
	364	5	38.9388
	365	5	39.1944
	366	50	57.1342
	367	50	57.5621
	368	50	55.6004
	369	50	55.1058
	370	6	46.3576
	371	6	46.2687
	372	6	40.6782
	373	6	51.9981
	374	1	5.57949
	375	1	6.39641
	376	1	11.4813
	377	1	19.9561
	378	0.5	6.79081
	379	0.5	7.76331
	380	0.5	9.81389
	381	0.5	7.052
	382	0	9.57516
	383	0	7.6968
	384	0	5.44056
	385	0	7.36893
	386	3	47.1745
	387	3	31.5478
	388	3	32.2314
	389	3	43.5012
	390	10	46.2809
	391	10	51.8715
	392	10	44.5081
	393	10	42.5742
	394	200	57.4663
	395	200	59.6447
	396	200	59.1112
	397	200	59.2112
	398	50	56.7619
	399	50	52.2549
	400	50	52.3216
	401	50	55.7949
	402	2	28.8137
	403	2	9.61939
	404	2	30.8365
	405	2	18.3385
	406	0	10.192
	407	0	6.40752
	408	0	8.40258
	409	0	7.72459
	410	0.3	9.48046
	411	0.3	7.48545
	412	0.3	8.16342
	413	50	59.9892
	414	50	59.6169
	415	50	59.5669
	416	50	59.9892
	417	0.5	24.6631
	418	0.5	21.4177
	419	0.5	29.9925
	420	3	6.92435
	421	3	7.13552
	422	3	29.8369
	423	3	7.66346
	424	50	59.1612
	425	50	59.9892
	426	50	59.5558
	427	50	58.7389
	428	5	8.85807
	429	5	22.6786
	430	5	8.50797
	431	5	9.70831
	432	6	8.09693
	433	6	8.9972
	434	6	18.389
	435	6	7.84685
	436	1	18.6831
	437	1	28.1024
	438	1	26.6909
	439	1	22.6786
	440	10	35.7221
	441	10	45.6807
	442	10	36.1
	443	10	44.5803
