# Supplementary material for: Accept–reject decision-making revealed via a quantitative and ethological study of C. elegans foraging
Source: eLife. 2025 Sep 10;13:RP103191. doi: 10.7554/eLife.103191 (PMC12422737; doi:10.7554/eLife.103191)
Supplement: Figure 2—source data 5. [file elife-103191-fig2-data5.xlsx]

## Sheet: Sheet1
Figure 2 - Source Data 5
Figure 2F - On patch residence
Summary Statistics
	label	OD600	growth time (hr)	relative density	# worms	saturation	earliest time (min) p<0.001		* patch locations were semi-randomly permuted (1000 replicates) as described in Figure 1 - supplement 4
	0	0	1	0.01	30	0.8			* the earliest time (min) when animals p(on patch) exceeded that of the permuted estimates is given
	0.2	0.05	1	0.226252	23	0.73375
	0.3	0.1	1	0.283734	25	0.713375
	0.5	0.5	1	0.48652	35	0.664843	34.9333
	1	1	1	1.12995	46	0.589005	8.5
	2	2	1	2.23926	44	0.527447	9.93333
	3	3	1	2.91659	48	0.503663	11.2833
	5	4	1	5.04816	44	0.454288	8.58333
	6	5	1	5.87791	50	0.440592	8.5
	10	10	1	10	50	0.392767	1.85
	50	1	12	53.4889	20	0.241847	0.25
	200	1	48	213.259	28	0.117375	0
Contingency Tables (i.e. # replicates on or off patch given original and permuted patch locations)
	label	time (min)	original - off patch	original - on patch	permuted - off patch	permuted - on patch	p-value	adjusted p-value		* animal "on patch" if midpoint distance was within 0.46024 mm from patch edge)
	0	0	27	3	23994	6006	0.956013	1.07747		* p-value computed using one-tailed Fisher's Exact Test and adjusted using Benjamini-Hochberg method for multiple comparisons
	0	0.0166667	29	1	23974	6026	0.998798	1.01487
	0	0.0333333	28	2	23996	6004	0.989504	1.0147
	0	0.05	27	3	23989	6011	0.956208	1.07747
	0	0.0666667	27	3	23980	6020	0.956557	1.07747
	0	0.0833333	28	2	23979	6021	0.989693	1.0147
	0	0.1	28	2	23987	6013	0.989605	1.0147
	0	0.116667	26	4	24009	5991	0.876439	1.16193
	0	0.133333	25	5	24006	5994	0.74389	1.27538
	0	0.15	27	3	24078	5922	0.952618	1.08266
	0	0.166667	27	3	24085	5915	0.952325	1.08266
	0	0.183333	26	4	24120	5880	0.86626	1.17863
	0	0.2	27	3	24124	5876	0.950662	1.08303
	0	0.216667	26	4	24100	5900	0.868142	1.1757
	0	0.233333	25	5	24116	5884	0.727746	1.28741
	0	0.25	24	6	24206	5794	0.53502	1.44383
	0	0.266667	24	6	24232	5768	0.530205	1.44939
	0	0.283333	25	5	24244	5756	0.708146	1.30479
	0	0.3	23	7	24298	5702	0.340232	1.73353
	0	0.316667	25	5	24255	5745	0.706422	1.30483
	0	0.333333	26	4	24246	5754	0.853902	1.19138
	0	0.35	26	4	24274	5726	0.851037	1.1936
	0	0.366667	26	4	24328	5672	0.845386	1.19677
	0	0.383333	25	5	24371	5629	0.687849	1.33061
	0	0.4	25	5	24383	5617	0.685888	1.33588
	0	0.416667	25	5	24438	5562	0.676806	1.34465
	0	0.433333	25	5	24457	5543	0.673633	1.34588
	0	0.45	27	3	24491	5509	0.932318	1.09315
	0	0.466667	27	3	24485	5515	0.93266	1.09315
	0	0.483333	27	3	24545	5455	0.929167	1.09774
	0	0.5	27	3	24537	5463	0.929641	1.09774
	0	0.516667	27	3	24608	5392	0.925329	1.10669
	0	0.533333	26	4	24635	5365	0.810009	1.21656
	0	0.55	27	3	24630	5370	0.923947	1.10819
	0	0.566667	27	3	24616	5384	0.924829	1.10669
	0	0.583333	27	3	24600	5400	0.925826	1.10669
	0	0.6	25	5	24603	5397	0.648651	1.35672
	0	0.616667	25	5	24584	5416	0.651961	1.35786
	0	0.633333	26	4	24574	5426	0.817489	1.20762
	0	0.65	26	4	24589	5411	0.815671	1.21074
	0	0.666667	26	4	24588	5412	0.815793	1.21074
	0	0.683333	27	3	24674	5326	0.921117	1.1121
	0	0.7	27	3	24702	5298	0.919268	1.11574
	0	0.716667	27	3	24751	5249	0.915943	1.11898
	0	0.733333	28	2	24718	5282	0.977759	1.04094
	0	0.75	28	2	24664	5336	0.978946	1.04094
	0	0.766667	27	3	24710	5290	0.918733	1.11574
	0	0.783333	27	3	24715	5285	0.918397	1.11574
	0	0.8	26	4	24758	5242	0.794225	1.22398
	0	0.816667	26	4	24777	5223	0.791702	1.22641
	0	0.833333	27	3	24744	5256	0.916425	1.11898
	0	0.85	26	4	24744	5256	0.79607	1.22287
	0	0.866667	27	3	24771	5229	0.914552	1.12125
	0	0.883333	27	3	24768	5232	0.914762	1.12125
	0	0.9	28	2	24729	5271	0.977509	1.04094
	0	0.916667	28	2	24707	5293	0.978005	1.04094
	0	0.933333	28	2	24733	5267	0.977418	1.04094
	0	0.95	27	3	24696	5304	0.919668	1.11288
	0	0.966667	27	3	24628	5372	0.924074	1.10819
	0	0.983333	27	3	24640	5360	0.923312	1.10819
	0	1	28	2	24550	5450	0.981262	1.03532
	0	1.01667	28	2	24527	5473	0.9817	1.03385
	0	1.03333	27	3	24565	5435	0.927967	1.10669
	0	1.05	27	3	24551	5449	0.928809	1.09774
	0	1.06667	26	4	24537	5463	0.821916	1.20728
	0	1.08333	25	5	24502	5498	0.666045	1.35014
	0	1.1	25	5	24426	5574	0.6788	1.34293
	0	1.11667	25	5	24423	5577	0.679298	1.34293
	0	1.13333	24	6	24416	5584	0.495719	1.48451
	0	1.15	25	5	24433	5567	0.677638	1.34319
	0	1.16667	24	6	24444	5556	0.490416	1.49202
	0	1.18333	23	7	24460	5540	0.312068	1.76905
	0	1.2	23	7	24407	5593	0.321219	1.76978
	0	1.21667	22	8	24415	5585	0.181697	2.20238
	0	1.23333	23	7	24454	5546	0.313101	1.76905
	0	1.25	23	7	24499	5501	0.305378	1.79581
	0	1.26667	23	7	24491	5509	0.306747	1.79581
	0	1.28333	23	7	24513	5487	0.302986	1.83915
	0	1.3	24	6	24539	5461	0.47234	1.54584
	0	1.31667	24	6	24569	5431	0.466607	1.55094
	0	1.33333	23	7	24576	5424	0.292287	1.8588
	0	1.35	23	7	24565	5435	0.294147	1.84483
	0	1.36667	25	5	24564	5436	0.655426	1.35748
	0	1.38333	26	4	24587	5413	0.815914	1.21074
	0	1.4	27	3	24601	5399	0.925765	1.10669
	0	1.41667	27	3	24597	5403	0.926012	1.10669
	0	1.43333	26	4	24597	5403	0.814696	1.21217
	0	1.45	25	5	24494	5506	0.667401	1.35014
	0	1.46667	26	4	24564	5436	0.818694	1.20657
	0	1.48333	28	2	24636	5364	0.979539	1.04094
	0	1.5	28	2	24672	5328	0.978774	1.04094
	0	1.51667	28	2	24696	5304	0.97825	1.04094
	0	1.53333	27	3	24752	5248	0.915874	1.11898
	0	1.55	27	3	24797	5203	0.912715	1.122
	0	1.56667	27	3	24807	5193	0.911999	1.12228
	0	1.58333	28	2	24876	5124	0.973916	1.05169
	0	1.6	28	2	24886	5114	0.973653	1.05169
	0	1.61667	27	3	24899	5101	0.905173	1.12824
	0	1.63333	28	2	24826	5174	0.975194	1.05169
	0	1.65	28	2	24779	5221	0.976342	1.05169
	0	1.66667	29	1	24810	5190	0.996642	1.01296
	0	1.68333	28	2	24797	5203	0.975908	1.05169
	0	1.7	28	2	24710	5290	0.977938	1.04094
	0	1.71667	28	2	24701	5299	0.978139	1.04094
	0	1.73333	28	2	24642	5358	0.979413	1.04094
	0	1.75	27	3	24606	5394	0.925454	1.10669
	0	1.76667	27	3	24596	5404	0.926074	1.10669
	0	1.78333	27	3	24543	5457	0.929286	1.09774
	0	1.8	26	4	24538	5462	0.821797	1.20728
	0	1.81667	26	4	24611	5389	0.812979	1.21241
	0	1.83333	26	4	24623	5377	0.811499	1.21432
	0	1.85	27	3	24595	5405	0.926136	1.10669
	0	1.86667	24	6	24661	5339	0.448972	1.59398
	0	1.88333	24	6	24697	5303	0.442054	1.60585
	0	1.9	25	5	24733	5267	0.625544	1.364
	0	1.91667	26	4	24709	5291	0.800627	1.22183
	0	1.93333	25	5	24656	5344	0.639326	1.36198
	0	1.95	26	4	24687	5313	0.803452	1.21889
	0	1.96667	26	4	24636	5364	0.809885	1.21656
	0	1.98333	25	5	24671	5329	0.636663	1.36104
	0	2	25	5	24644	5356	0.641449	1.36082
	0	2.01667	25	5	24561	5439	0.655944	1.35557
	0	2.03333	26	4	24544	5456	0.821085	1.20728
	0	2.05	25	5	24547	5453	0.658357	1.35821
	0	2.06667	26	4	24574	5426	0.817489	1.20762
	0	2.08333	26	4	24539	5461	0.821678	1.20728
	0	2.1	26	4	24591	5409	0.815428	1.21074
	0	2.11667	26	4	24677	5323	0.804726	1.21973
	0	2.13333	26	4	24680	5320	0.804344	1.21973
	0	2.15	26	4	24714	5286	0.79998	1.22183
	0	2.16667	26	4	24733	5267	0.79751	1.22256
	0	2.18333	27	3	24788	5212	0.913355	1.122
	0	2.2	27	3	24809	5191	0.911855	1.12228
	0	2.21667	27	3	24793	5207	0.913	1.122
	0	2.23333	28	2	24783	5217	0.976246	1.05169
	0	2.25	28	2	24839	5161	0.974868	1.05169
	0	2.26667	28	2	24925	5075	0.972605	1.05169
	0	2.28333	28	2	24928	5072	0.972523	1.05169
	0	2.3	27	3	24967	5033	0.89984	1.13531
	0	2.31667	27	3	24954	5046	0.900879	1.13397
	0	2.33333	28	2	24988	5012	0.970829	1.05914
	0	2.35	28	2	24995	5005	0.970626	1.05914
	0	2.36667	28	2	24978	5022	0.971118	1.05914
	0	2.38333	28	2	24983	5017	0.970974	1.05914
	0	2.4	28	2	24967	5033	0.971433	1.05914
	0	2.41667	27	3	24950	5050	0.901197	1.13397
	0	2.43333	26	4	24930	5070	0.770549	1.25336
	0	2.45	26	4	24907	5093	0.773825	1.25336
	0	2.46667	25	5	24830	5170	0.607801	1.38314
	0	2.48333	24	6	24759	5241	0.430122	1.62566
	0	2.5	23	7	24764	5236	0.261073	1.91455
	0	2.51667	21	9	24758	5242	0.0654229	3.8668
	0	2.53333	20	10	24734	5266	0.0276605	6.82845
	0	2.55	20	10	24717	5283	0.0282332	6.82845
	0	2.56667	21	9	24705	5295	0.0689926	3.8668
	0	2.58333	21	9	24748	5252	0.0660867	3.8668
	0	2.6	22	8	24744	5256	0.141449	2.31355
	0	2.61667	23	7	24776	5224	0.259121	1.92477
	0	2.63333	24	6	24751	5249	0.431662	1.62154
	0	2.65	24	6	24726	5274	0.436475	1.61271
	0	2.66667	25	5	24682	5318	0.634703	1.35965
	0	2.68333	26	4	24652	5348	0.807884	1.21736
	0	2.7	26	4	24604	5396	0.813839	1.21217
	0	2.71667	26	4	24642	5358	0.809136	1.21656
	0	2.73333	25	5	24622	5378	0.645323	1.3554
	0	2.75	23	7	24667	5333	0.277037	1.87822
	0	2.76667	24	6	24712	5288	0.439168	1.60671
	0	2.78333	25	5	24753	5247	0.62192	1.36602
	0	2.8	26	4	24840	5160	0.783173	1.23227
	0	2.81667	25	5	24895	5105	0.595683	1.3916
	0	2.83333	24	6	24917	5083	0.399688	1.64794
	0	2.85	24	6	24892	5108	0.404502	1.64541
	0	2.86667	25	5	24872	5128	0.599991	1.38994
	0	2.88333	23	7	24852	5148	0.246877	1.94752
	0	2.9	25	5	24790	5210	0.615168	1.37989
	0	2.91667	24	6	24744	5256	0.43301	1.6186
	0	2.93333	24	6	24718	5282	0.438014	1.61271
	0	2.95	25	5	24687	5313	0.633811	1.36242
	0	2.96667	25	5	24705	5295	0.630588	1.3618
	0	2.98333	25	5	24636	5364	0.64286	1.35922
	0	3	23	7	24590	5410	0.289925	1.8588
	0	3.01667	23	7	24542	5458	0.298048	1.85315
	0	3.03333	23	7	24508	5492	0.30384	1.83915
	0	3.05	24	6	24485	5515	0.48263	1.50863
	0	3.06667	23	7	24474	5526	0.309662	1.76582
	0	3.08333	22	8	24475	5525	0.17397	2.24586
	0	3.1	21	9	24454	5546	0.0876408	2.8846
	0	3.11667	20	10	24469	5531	0.0376223	3.6847
	0	3.13333	22	8	24479	5521	0.173461	2.24586
	0	3.15	22	8	24411	5589	0.182218	2.20238
	0	3.16667	23	7	24393	5607	0.323647	1.76722
	0	3.18333	24	6	24476	5524	0.484341	1.50449
	0	3.2	23	7	24488	5512	0.307261	1.79581
	0	3.21667	24	6	24512	5488	0.47749	1.53981
	0	3.23333	23	7	24480	5520	0.308633	1.77205
	0	3.25	23	7	24514	5486	0.302815	1.83915
	0	3.26667	23	7	24538	5462	0.298727	1.85315
	0	3.28333	24	6	24606	5394	0.459524	1.57204
	0	3.3	24	6	24633	5367	0.454347	1.58209
	0	3.31667	25	5	24660	5340	0.638617	1.36198
	0	3.33333	23	7	24636	5364	0.282204	1.86725
	0	3.35	23	7	24573	5427	0.292794	1.8588
	0	3.36667	23	7	24614	5386	0.285889	1.85277
	0	3.38333	21	9	24509	5491	0.0833056	2.9551
	0	3.4	21	9	24431	5569	0.0894956	2.76338
	0	3.41667	21	9	24432	5568	0.0894145	2.76338
	0	3.43333	21	9	24401	5599	0.0919521	2.70529
	0	3.45	21	9	24385	5615	0.0932794	2.67627
	0	3.46667	21	9	24359	5641	0.095462	2.59744
	0	3.48333	22	8	24407	5593	0.182739	2.20238
	0	3.5	23	7	24343	5657	0.332353	1.75392
	0	3.51667	23	7	24411	5589	0.320526	1.76978
	0	3.53333	23	7	24415	5585	0.319834	1.77301
	0	3.55	23	7	24456	5544	0.312757	1.76905
	0	3.56667	24	6	24467	5533	0.486052	1.49725
	0	3.58333	24	6	24438	5562	0.491554	1.48705
	0	3.6	24	6	24458	5542	0.48776	1.49401
	0	3.61667	25	5	24496	5504	0.667062	1.35014
	0	3.63333	26	4	24527	5473	0.823098	1.2049
	0	3.65	25	5	24536	5464	0.660245	1.35526
	0	3.66667	24	6	24524	5476	0.475202	1.53981
	0	3.68333	23	7	24510	5490	0.303498	1.83915
	0	3.7	23	7	24524	5476	0.30111	1.83976
	0	3.71667	24	6	24497	5503	0.480347	1.51584
	0	3.73333	23	7	24507	5493	0.304011	1.83915
	0	3.75	23	7	24478	5522	0.308976	1.77205
	0	3.76667	24	6	24477	5523	0.484151	1.50449
	0	3.78333	25	5	24516	5484	0.663664	1.3527
	0	3.8	24	6	24536	5464	0.472912	1.5449
	0	3.81667	24	6	24562	5438	0.467946	1.54732
	0	3.83333	25	5	24575	5425	0.653523	1.35826
	0	3.85	26	4	24592	5408	0.815306	1.21074
	0	3.86667	26	4	24622	5378	0.811623	1.21432
	0	3.88333	26	4	24620	5380	0.81187	1.21432
	0	3.9	26	4	24702	5298	0.801529	1.21923
	0	3.91667	26	4	24775	5225	0.791969	1.22641
	0	3.93333	26	4	24782	5218	0.791035	1.22641
	0	3.95	24	6	24833	5167	0.415867	1.64519
	0	3.96667	25	5	24887	5113	0.597184	1.39307
	0	3.98333	25	5	24941	5059	0.587001	1.39566
	0	4	25	5	24920	5080	0.590975	1.39217
	0	4.01667	23	7	24921	5079	0.235952	1.98285
	0	4.03333	22	8	24911	5089	0.12308	2.41087
	0	4.05	24	6	24942	5058	0.394877	1.65565
	0	4.06667	23	7	24921	5079	0.235952	1.98285
	0	4.08333	23	7	24938	5062	0.233289	1.98911
	0	4.1	23	7	24900	5100	0.239257	1.95805
	0	4.11667	22	8	24916	5084	0.122552	2.41087
	0	4.13333	23	7	24935	5065	0.233758	1.98911
	0	4.15	26	4	24923	5077	0.771549	1.25336
	0	4.16667	26	4	24888	5112	0.776505	1.24051
	0	4.18333	26	4	24904	5096	0.774249	1.25336
	0	4.2	26	4	24897	5103	0.775238	1.24293
	0	4.21667	26	4	24933	5067	0.770119	1.25336
	0	4.23333	24	6	24850	5150	0.412592	1.64048
	0	4.25	24	6	24824	5176	0.417601	1.64549
	0	4.26667	24	6	24807	5193	0.420876	1.63625
	0	4.28333	25	5	24778	5222	0.617365	1.37397
	0	4.3	25	5	24792	5208	0.614802	1.37989
	0	4.31667	24	6	24786	5214	0.424922	1.63432
	0	4.33333	24	6	24769	5231	0.428196	1.62606
	0	4.35	26	4	24829	5171	0.784681	1.23087
	0	4.36667	26	4	24860	5140	0.780413	1.23143
	0	4.38333	26	4	24881	5119	0.777487	1.24051
	0	4.4	26	4	24880	5120	0.777627	1.24051
	0	4.41667	26	4	24879	5121	0.777767	1.24051
	0	4.43333	25	5	24840	5160	0.605949	1.38303
	0	4.45	26	4	24790	5210	0.789963	1.22715
	0	4.46667	25	5	24749	5251	0.622647	1.36595
	0	4.48333	24	6	24732	5268	0.43532	1.61547
	0	4.5	24	6	24706	5294	0.440323	1.60604
	0	4.51667	24	6	24609	5391	0.458949	1.57204
	0	4.53333	25	5	24638	5362	0.642508	1.35922
	0	4.55	26	4	24643	5357	0.809011	1.21656
	0	4.56667	26	4	24639	5361	0.809511	1.21656
	0	4.58333	26	4	24660	5340	0.806878	1.21839
	0	4.6	26	4	24566	5434	0.818453	1.20657
	0	4.61667	26	4	24588	5412	0.815793	1.21074
	0	4.63333	26	4	24466	5534	0.830178	1.2066
	0	4.65	26	4	24516	5484	0.824391	1.20594
	0	4.66667	27	3	24558	5442	0.928389	1.0976
	0	4.68333	25	5	24619	5381	0.64585	1.3554
	0	4.7	25	5	24659	5341	0.638794	1.36198
	0	4.71667	24	6	24748	5252	0.43224	1.62154
	0	4.73333	25	5	24761	5239	0.620466	1.36784
	0	4.75	25	5	24836	5164	0.60669	1.38321
	0	4.76667	26	4	24826	5174	0.785091	1.23087
	0	4.78333	27	3	24852	5148	0.908715	1.12534
	0	4.8	27	3	24848	5152	0.909011	1.12534
	0	4.81667	27	3	24873	5127	0.907146	1.12791
	0	4.83333	28	2	24863	5137	0.974254	1.05169
	0	4.85	28	2	24899	5101	0.973308	1.05169
	0	4.86667	27	3	24859	5141	0.908195	1.12586
	0	4.88333	27	3	24743	5257	0.916494	1.11898
	0	4.9	27	3	24765	5235	0.914972	1.12125
	0	4.91667	28	2	24777	5223	0.97639	1.05169
	0	4.93333	28	2	24681	5319	0.978579	1.04094
	0	4.95	26	4	24734	5266	0.797379	1.22256
	0	4.96667	26	4	24742	5258	0.796332	1.22287
	0	4.98333	26	4	24799	5201	0.788753	1.22856
	0	5	26	4	24825	5175	0.785227	1.23087
	0	5.01667	26	4	24942	5058	0.768826	1.25523
	0	5.03333	26	4	25037	4963	0.754859	1.27042
	0	5.05	26	4	25083	4917	0.747885	1.27143
	0	5.06667	26	4	25092	4908	0.746504	1.27358
	0	5.08333	25	5	25112	4888	0.554005	1.43599
	0	5.1	25	5	25138	4862	0.548894	1.44446
	0	5.11667	25	5	25230	4770	0.530633	1.44939
	0	5.13333	26	4	25304	4696	0.712452	1.30537
	0	5.15	27	3	25376	4624	0.862106	1.18324
	0	5.16667	27	3	25399	4601	0.859672	1.18244
	0	5.18333	26	4	25426	4574	0.69153	1.3235
	0	5.2	28	2	25459	4541	0.953784	1.07945
	0	5.21667	28	2	25474	4526	0.953114	1.08266
	0	5.23333	28	2	25499	4501	0.951979	1.08266
	0	5.25	27	3	25566	4434	0.84092	1.20457
	0	5.26667	27	3	25571	4429	0.840329	1.20457
	0	5.28333	28	2	25556	4444	0.949296	1.08389
	0	5.3	28	2	25540	4460	0.950063	1.08356
	0	5.31667	25	5	25495	4505	0.476704	1.53981
	0	5.33333	26	4	25478	4522	0.68232	1.34162
	0	5.35	26	4	25441	4559	0.688891	1.33061
	0	5.36667	26	4	25469	4531	0.683926	1.33925
	0	5.38333	26	4	25452	4548	0.686946	1.33315
	0	5.4	26	4	25433	4567	0.6903	1.3275
	0	5.41667	25	5	25384	4616	0.499505	1.4761
	0	5.43333	25	5	25405	4595	0.495212	1.48451
	0	5.45	24	6	25396	4604	0.308767	1.77205
	0	5.46667	25	5	25375	4625	0.501341	1.47333
	0	5.48333	25	5	25338	4662	0.50887	1.47373
	0	5.5	25	5	25326	4674	0.511304	1.46552
	0	5.51667	26	4	25293	4707	0.714291	1.302
	0	5.53333	26	4	25275	4725	0.717283	1.30061
	0	5.55	28	2	25231	4769	0.962936	1.07171
	0	5.56667	27	3	25226	4774	0.877132	1.16193
	0	5.58333	27	3	25236	4764	0.876174	1.16193
	0	5.6	28	2	25280	4720	0.961123	1.07439
	0	5.61667	25	5	25221	4779	0.532432	1.44661
	0	5.63333	25	5	25207	4793	0.535224	1.44383
	0	5.65	24	6	25205	4795	0.344592	1.72776
	0	5.66667	23	7	25178	4822	0.197036	2.21703
	0	5.68333	23	7	25243	4757	0.187677	2.20077
	0	5.7	22	8	25288	4712	0.0869667	2.8846
	0	5.71667	22	8	25336	4664	0.0829069	2.9551
	0	5.73333	23	7	25373	4627	0.169597	2.27335
	0	5.75	26	4	25429	4571	0.691003	1.3275
	0	5.76667	26	4	25484	4516	0.681246	1.34162
	0	5.78333	24	6	25533	4467	0.283636	1.85872
	0	5.8	26	4	25468	4532	0.684105	1.33925
	0	5.81667	24	6	25400	4600	0.308025	1.79581
	0	5.83333	25	5	25391	4609	0.498075	1.47639
	0	5.85	25	5	25359	4641	0.504601	1.47329
	0	5.86667	25	5	25392	4608	0.497871	1.47639
	0	5.88333	25	5	25337	4663	0.509073	1.47373
	0	5.9	25	5	25333	4667	0.509884	1.46636
	0	5.91667	25	5	25345	4655	0.507448	1.47403
	0	5.93333	25	5	25315	4685	0.513532	1.46143
	0	5.95	26	4	25300	4700	0.713122	1.30411
	0	5.96667	24	6	25300	4700	0.326675	1.75527
	0	5.98333	26	4	25237	4763	0.723531	1.29243
	0	6	24	6	25158	4842	0.353516	1.71381
	0	6.01667	24	6	25077	4923	0.36897	1.67081
	0	6.03333	24	6	25069	4931	0.370501	1.67096
	0	6.05	23	7	25081	4919	0.211377	2.09054
	0	6.06667	24	6	25045	4955	0.375097	1.66043
	0	6.08333	23	7	25033	4967	0.218633	2.05965
	0	6.1	22	8	25016	4984	0.11227	2.43478
	0	6.11667	23	7	25060	4940	0.214539	2.09678
	0	6.13333	22	8	25093	4907	0.104711	2.44554
	0	6.15	22	8	25094	4906	0.104615	2.44554
	0	6.16667	22	8	25079	4921	0.106062	2.44554
	0	6.18333	22	8	25087	4913	0.105289	2.44554
	0	6.2	20	10	25178	4822	0.0155529	6.83815
	0	6.21667	23	7	25147	4853	0.201571	2.15923
	0	6.23333	21	9	25115	4885	0.0445793	3.56659
	0	6.25	22	8	25141	4859	0.100157	2.54444
	0	6.26667	23	7	25145	4855	0.201865	2.15923
	0	6.28333	23	7	25136	4864	0.203191	2.15923
	0	6.3	24	6	25110	4890	0.362664	1.68696
	0	6.31667	24	6	25047	4953	0.374713	1.66043
	0	6.33333	23	7	25005	4995	0.222913	2.05239
	0	6.35	22	8	24993	5007	0.114589	2.44893
	0	6.36667	21	9	24954	5046	0.0533032	3.92186
	0	6.38333	21	9	24988	5012	0.0513703	3.92186
	0	6.4	21	9	24991	5009	0.0512021	3.92186
	0	6.41667	20	10	24989	5011	0.0200693	6.56815
	0	6.43333	21	9	24969	5031	0.0524444	3.92186
	0	6.45	22	8	24928	5072	0.121291	2.41242
	0	6.46667	23	7	25009	4991	0.222299	2.05199
	0	6.48333	24	6	25008	4992	0.382193	1.66279
	0	6.5	23	7	25020	4980	0.220616	2.05186
	0	6.51667	23	7	24929	5071	0.234697	1.98285
	0	6.53333	24	6	24937	5063	0.395839	1.65565
	0	6.55	24	6	24923	5077	0.398533	1.64721
	0	6.56667	23	7	24937	5063	0.233446	1.98911
	0	6.58333	22	8	24955	5045	0.11848	2.42346
	0	6.6	23	7	24997	5003	0.224142	2.05239
	0	6.61667	25	5	25122	4878	0.552042	1.44229
	0	6.63333	26	4	25207	4793	0.728397	1.28741
	0	6.65	27	3	25258	4742	0.874047	1.16884
	0	6.66667	27	3	25249	4751	0.874921	1.16884
	0	6.68333	27	3	25265	4735	0.873363	1.16884
	0	6.7	28	2	25285	4715	0.960933	1.07439
	0	6.71667	28	2	25276	4724	0.961274	1.07439
	0	6.73333	28	2	25287	4713	0.960857	1.07439
	0	6.75	27	3	25340	4660	0.865845	1.17863
	0	6.76667	27	3	25322	4678	0.867682	1.1757
	0	6.78333	26	4	25353	4647	0.704165	1.30848
	0	6.8	26	4	25336	4664	0.707058	1.30534
	0	6.81667	26	4	25371	4629	0.701081	1.30975
	0	6.83333	25	5	25339	4661	0.508667	1.47373
	0	6.85	23	7	25369	4631	0.170141	2.27335
	0	6.86667	23	7	25351	4649	0.172596	2.24586
	0	6.88333	23	7	25375	4625	0.169326	2.27335
	0	6.9	24	6	25314	4686	0.32405	1.76722
	0	6.91667	23	7	25312	4688	0.177973	2.22586
	0	6.93333	23	7	25297	4703	0.180062	2.22446
	0	6.95	23	7	25332	4668	0.175205	2.24586
	0	6.96667	23	7	25367	4633	0.170413	2.27335
	0	6.98333	23	7	25388	4612	0.167568	2.28502
	0	7	23	7	25413	4587	0.164212	2.26499
	0	7.01667	24	6	25428	4572	0.302849	1.83915
	0	7.03333	24	6	25422	4578	0.303956	1.83915
	0	7.05	24	6	25420	4580	0.304326	1.83915
	0	7.06667	26	4	25422	4578	0.692231	1.32175
	0	7.08333	24	6	25381	4619	0.31155	1.76905
	0	7.1	24	6	25433	4567	0.301926	1.83915
	0	7.11667	24	6	25473	4527	0.294574	1.84483
	0	7.13333	25	5	25475	4525	0.480831	1.51443
	0	7.15	25	5	25521	4479	0.471327	1.54465
	0	7.16667	25	5	25459	4541	0.484128	1.50449
	0	7.18333	26	4	25458	4542	0.685883	1.33588
	0	7.2	26	4	25446	4554	0.688008	1.33061
	0	7.21667	26	4	25426	4574	0.69153	1.3235
	0	7.23333	26	4	25405	4595	0.6952	1.31831
	0	7.25	25	5	25398	4602	0.496644	1.47762
	0	7.26667	27	3	25431	4569	0.856228	1.19138
	0	7.28333	26	4	25382	4618	0.699186	1.31278
	0	7.3	26	4	25395	4605	0.696937	1.31429
	0	7.31667	26	4	25348	4652	0.705017	1.30848
	0	7.33333	26	4	25298	4702	0.713456	1.30411
	0	7.35	27	3	25340	4660	0.865845	1.17863
	0	7.36667	27	3	25374	4626	0.862316	1.18324
	0	7.38333	27	3	25450	4550	0.85415	1.19138
	0	7.4	27	3	25407	4593	0.858818	1.18645
	0	7.41667	27	3	25410	4590	0.858496	1.18645
	0	7.43333	27	3	25449	4551	0.85426	1.19138
	0	7.45	25	5	25470	4530	0.481862	1.51443
	0	7.46667	25	5	25525	4475	0.470498	1.54543
	0	7.48333	27	3	25500	4500	0.848563	1.19656
	0	7.5	27	3	25517	4483	0.846623	1.19758
	0	7.51667	25	5	25464	4536	0.483098	1.50863
	0	7.53333	27	3	25423	4577	0.857095	1.18645
	0	7.55	27	3	25363	4637	0.863466	1.18116
	0	7.56667	27	3	25307	4693	0.869197	1.17317
	0	7.58333	26	4	25247	4753	0.721896	1.29301
	0	7.6	26	4	25284	4716	0.71579	1.30061
	0	7.61667	26	4	25296	4704	0.71379	1.30411
	0	7.63333	26	4	25290	4710	0.714791	1.30221
	0	7.65	27	3	25311	4689	0.868795	1.17317
	0	7.66667	26	4	25265	4735	0.718937	1.30061
	0	7.68333	26	4	25279	4721	0.71662	1.30061
	0	7.7	28	2	25258	4742	0.961946	1.07439
	0	7.71667	27	3	25237	4763	0.876078	1.16193
	0	7.73333	27	3	25224	4776	0.877322	1.16193
	0	7.75	27	3	25217	4783	0.877988	1.16193
	0	7.76667	27	3	25196	4804	0.879966	1.1547
	0	7.78333	27	3	25178	4822	0.88164	1.15155
	0	7.8	27	3	25216	4784	0.878083	1.16193
	0	7.81667	27	3	25155	4845	0.883751	1.15063
	0	7.83333	27	3	25137	4863	0.88538	1.14943
	0	7.85	26	4	25137	4863	0.739521	1.27687
	0	7.86667	27	3	25081	4919	0.890327	1.14683
	0	7.88333	27	3	25091	4909	0.889457	1.14807
	0	7.9	28	2	25143	4857	0.965997	1.07031
	0	7.91667	28	2	25224	4776	0.963188	1.07171
	0	7.93333	26	4	25231	4769	0.724509	1.29184
	0	7.95	26	4	25240	4760	0.723041	1.29243
	0	7.96667	27	3	25211	4789	0.878556	1.16193
	0	7.98333	26	4	25205	4795	0.728719	1.28741
	0	8	26	4	25231	4769	0.724509	1.29184
	0	8.01667	26	4	25266	4734	0.718772	1.30061
	0	8.03333	27	3	25231	4769	0.876654	1.16193
	0	8.05	27	3	25261	4739	0.873754	1.16884
	0	8.06667	26	4	25133	4867	0.740147	1.27734
	0	8.08333	26	4	25085	4915	0.747578	1.27143
	0	8.1	26	4	25037	4963	0.754859	1.27042
	0	8.11667	27	3	25026	4974	0.895009	1.1414
	0	8.13333	25	5	25095	4905	0.557333	1.42804
	0	8.15	25	5	25060	4940	0.564154	1.42476
	0	8.16667	26	4	25027	4973	0.756356	1.2685
	0	8.18333	26	4	25026	4974	0.756506	1.2685
	0	8.2	26	4	25034	4966	0.755309	1.27042
	0	8.21667	26	4	25123	4877	0.741708	1.27734
	0	8.23333	27	3	25144	4856	0.884749	1.15041
	0	8.25	26	4	25178	4822	0.733044	1.28043
	0	8.26667	26	4	25163	4837	0.735427	1.27715
	0	8.28333	25	5	25194	4806	0.537811	1.44487
	0	8.3	26	4	25089	4911	0.746965	1.27143
	0	8.31667	27	3	25054	4946	0.892647	1.14198
	0	8.33333	26	4	25035	4965	0.755159	1.27042
	0	8.35	28	2	25006	4994	0.970303	1.05914
	0	8.36667	28	2	24944	5056	0.97208	1.05914
	0	8.38333	28	2	24978	5022	0.971118	1.05914
	0	8.4	27	3	24960	5040	0.900401	1.13426
	0	8.41667	28	2	24946	5054	0.972025	1.05914
	0	8.43333	28	2	24896	5104	0.973388	1.05169
	0	8.45	28	2	24883	5117	0.973733	1.05169
	0	8.46667	27	3	24929	5071	0.902851	1.13255
	0	8.48333	26	4	24893	5107	0.775802	1.24051
	0	8.5	26	4	24967	5033	0.765207	1.26042
	0	8.51667	25	5	24991	5009	0.577468	1.40919
	0	8.53333	24	6	24959	5041	0.391608	1.65571
	0	8.55	24	6	24999	5001	0.383921	1.66279
	0	8.56667	25	5	25017	4983	0.572472	1.41062
	0	8.58333	25	5	25046	4954	0.566869	1.41882
	0	8.6	25	5	25056	4944	0.56493	1.42476
	0	8.61667	25	5	25085	4915	0.559286	1.427
	0	8.63333	25	5	25132	4868	0.550076	1.44519
	0	8.65	25	5	25162	4838	0.544157	1.44764
	0	8.66667	26	4	25208	4792	0.728236	1.28741
	0	8.68333	25	5	25296	4704	0.517372	1.46082
	0	8.7	25	5	25220	4780	0.532631	1.44661
	0	8.71667	25	5	25221	4779	0.532432	1.44661
	0	8.73333	25	5	25242	4758	0.528232	1.45279
	0	8.75	26	4	25204	4796	0.72888	1.28741
	0	8.76667	26	4	25194	4806	0.730487	1.28156
	0	8.78333	27	3	25285	4715	0.871393	1.17005
	0	8.8	27	3	25256	4744	0.874241	1.16884
	0	8.81667	26	4	25258	4742	0.72009	1.29357
	0	8.83333	28	2	25223	4777	0.963224	1.07171
	0	8.85	28	2	25171	4829	0.965049	1.07031
	0	8.86667	28	2	25147	4853	0.965863	1.07031
	0	8.88333	27	3	25165	4835	0.882837	1.15069
	0	8.9	27	3	25130	4870	0.886009	1.1488
	0	8.91667	26	4	25086	4914	0.747425	1.27143
	0	8.93333	25	5	25050	4950	0.566094	1.41918
	0	8.95	25	5	24982	5018	0.579191	1.40025
	0	8.96667	25	5	24909	5091	0.59305	1.39087
	0	8.98333	26	4	24864	5136	0.779858	1.23135
	0	9	25	5	24868	5132	0.600738	1.38988
	0	9.01667	25	5	24867	5133	0.600925	1.38988
	0	9.03333	26	4	24915	5085	0.772689	1.25336
	0	9.05	26	4	24861	5139	0.780274	1.23143
	0	9.06667	26	4	24868	5132	0.779301	1.23102
	0	9.08333	27	3	24849	5151	0.908937	1.12534
	0	9.1	26	4	24819	5181	0.786044	1.23087
	0	9.11667	26	4	24872	5128	0.778744	1.23294
	0	9.13333	26	4	24859	5141	0.780551	1.23143
	0	9.15	27	3	24884	5116	0.906316	1.12791
	0	9.16667	27	3	24920	5080	0.903553	1.12905
	0	9.18333	27	3	24927	5073	0.903007	1.13255
	0	9.2	28	2	24913	5087	0.972932	1.05169
	0	9.21667	28	2	24921	5079	0.972714	1.05169
	0	9.23333	28	2	24981	5019	0.971032	1.05914
	0	9.25	28	2	25007	4993	0.970273	1.05914
	0	9.26667	28	2	24993	5007	0.970684	1.05914
	0	9.28333	28	2	24991	5009	0.970742	1.05914
	0	9.3	28	2	25009	4991	0.970214	1.05914
	0	9.31667	28	2	25043	4957	0.969193	1.06452
	0	9.33333	29	1	25113	4887	0.995168	1.01298
	0	9.35	28	2	25173	4827	0.964981	1.07031
	0	9.36667	28	2	25215	4785	0.963511	1.07171
	0	9.38333	26	4	25281	4719	0.716288	1.30061
	0	9.4	24	6	25318	4682	0.323301	1.76722
	0	9.41667	24	6	25287	4713	0.329116	1.75588
	0	9.43333	24	6	25391	4609	0.309694	1.76582
	0	9.45	24	6	25480	4520	0.293293	1.8588
	0	9.46667	24	6	25438	4562	0.301005	1.83976
	0	9.48333	23	7	25455	4545	0.158649	2.29285
	0	9.5	22	8	25535	4465	0.0673627	3.8668
	0	9.51667	23	7	25568	4432	0.144166	2.28633
	0	9.53333	23	7	25651	4349	0.133987	2.35084
	0	9.55	23	7	25662	4338	0.132668	2.39489
	0	9.56667	24	6	25722	4278	0.249992	1.93942
	0	9.58333	23	7	25724	4276	0.125365	2.4006
	0	9.6	24	6	25709	4291	0.252262	1.91802
	0	9.61667	23	7	25733	4267	0.124323	2.41087
	0	9.63333	24	6	25741	4259	0.246685	1.94752
	0	9.65	25	5	25734	4266	0.426897	1.63432
	0	9.66667	25	5	25782	4218	0.416822	1.64549
	0	9.68333	25	5	25763	4237	0.420811	1.63625
	0	9.7	25	5	25772	4228	0.418922	1.64549
	0	9.71667	25	5	25757	4243	0.422071	1.63469
	0	9.73333	24	6	25749	4251	0.245298	1.94372
	0	9.75	24	6	25723	4277	0.249817	1.93942
	0	9.76667	27	3	25718	4282	0.822125	1.20728
	0	9.78333	28	2	25707	4293	0.941512	1.08358
	0	9.8	28	2	25730	4270	0.940235	1.08337
	0	9.81667	28	2	25797	4203	0.93637	1.08803
	0	9.83333	27	3	25763	4237	0.816231	1.21074
	0	9.85	27	3	25790	4210	0.81262	1.21241
	0	9.86667	27	3	25777	4223	0.814365	1.21217
	0	9.88333	27	3	25763	4237	0.816231	1.21074
	0	9.9	26	4	25768	4232	0.627849	1.36403
	0	9.91667	26	4	25825	4175	0.616544	1.37434
	0	9.93333	26	4	25811	4189	0.619338	1.36826
	0	9.95	27	3	25803	4197	0.810861	1.21457
	0	9.96667	28	2	25776	4224	0.937605	1.08803
	0	9.98333	28	2	25783	4217	0.937196	1.08803
	0	10	29	1	25767	4233	0.989556	1.0147
	0	10.0167	28	2	25798	4202	0.936311	1.08803
	0	10.0333	28	2	25813	4187	0.935414	1.09058
	0	10.05	28	2	25827	4173	0.934567	1.09058
	0	10.0667	28	2	25826	4174	0.934628	1.09058
	0	10.0833	28	2	25806	4194	0.935834	1.09058
	0	10.1	28	2	25788	4212	0.936902	1.08803
	0	10.1167	25	5	25812	4188	0.410519	1.64025
	0	10.1333	25	5	25824	4176	0.407997	1.63927
	0	10.15	24	6	25849	4151	0.228188	2.01395
	0	10.1667	23	7	25898	4102	0.106086	2.44554
	0	10.1833	23	7	25904	4096	0.105454	2.44554
	0	10.2	24	6	25924	4076	0.215658	2.09058
	0	10.2167	24	6	25932	4068	0.214338	2.09678
	0	10.2333	24	6	25897	4103	0.220138	2.05186
	0	10.25	24	6	25907	4093	0.218474	2.05965
	0	10.2667	24	6	25937	4063	0.213514	2.09852
	0	10.2833	25	5	25935	4065	0.384668	1.6496
	0	10.3	24	6	25966	4034	0.208763	2.09929
	0	10.3167	25	5	26017	3983	0.367462	1.67356
	0	10.3333	27	3	26043	3957	0.775999	1.24051
	0	10.35	27	3	26025	3975	0.778775	1.23294
	0	10.3667	26	4	26059	3941	0.56823	1.41709
	0	10.3833	26	4	26047	3953	0.570778	1.41074
	0	10.4	26	4	26062	3938	0.567592	1.41701
	0	10.4167	27	3	26086	3914	0.76926	1.25523
	0	10.4333	26	4	26091	3909	0.561399	1.42628
	0	10.45	26	4	26064	3936	0.567166	1.41882
	0	10.4667	25	5	26042	3958	0.362227	1.68696
	0	10.4833	26	4	26019	3981	0.576696	1.40919
	0	10.5	26	4	26019	3981	0.576696	1.40919
	0	10.5167	27	3	25992	4008	0.783795	1.23163
	0	10.5333	26	4	25896	4104	0.602201	1.38709
	0	10.55	26	4	25850	4150	0.611526	1.37938
	0	10.5667	26	4	25797	4203	0.622121	1.36602
	0	10.5833	25	5	25712	4288	0.431509	1.62154
	0	10.6	25	5	25617	4383	0.451374	1.59224
	0	10.6167	26	4	25551	4449	0.669101	1.34832
	0	10.6333	28	2	25481	4519	0.952799	1.08266
	0	10.65	27	3	25425	4575	0.856879	1.18645
	0	10.6667	27	3	25419	4581	0.857527	1.18645
	0	10.6833	27	3	25361	4639	0.863674	1.18116
	0	10.7	28	2	25268	4732	0.961574	1.07439
	0	10.7167	28	2	25226	4774	0.963116	1.07171
	0	10.7333	28	2	25256	4744	0.962021	1.07439
	0	10.75	28	2	25307	4693	0.960089	1.07439
	0	10.7667	28	2	25260	4740	0.961872	1.07439
	0	10.7833	27	3	25190	4810	0.880526	1.1547
	0	10.8	28	2	25181	4819	0.964705	1.07031
	0	10.8167	27	3	25146	4854	0.884568	1.15041
	0	10.8333	27	3	25104	4896	0.888318	1.14869
	0	10.85	26	4	25116	4884	0.742796	1.27553
	0	10.8667	26	4	25106	4894	0.744346	1.27538
	0	10.8833	26	4	25169	4831	0.734476	1.28044
	0	10.9	26	4	25117	4883	0.742641	1.27553
	0	10.9167	27	3	25114	4886	0.887434	1.14878
	0	10.9333	27	3	25088	4912	0.889719	1.14807
	0	10.95	28	2	25036	4964	0.969406	1.06452
	0	10.9667	27	3	24917	5083	0.903786	1.12905
	0	10.9833	27	3	24886	5114	0.906164	1.12791
	0	11	27	3	24979	5021	0.898873	1.1381
	0	11.0167	26	4	24957	5043	0.76666	1.25625
	0	11.0333	25	5	24947	5053	0.585862	1.39669
	0	11.05	25	5	24935	5065	0.588138	1.39488
	0	11.0667	25	5	24856	5144	0.602975	1.38709
	0	11.0833	25	5	24878	5122	0.59887	1.39092
	0	11.1	25	5	24883	5117	0.597934	1.3918
	0	11.1167	25	5	24894	5106	0.595871	1.3916
	0	11.1333	26	4	24874	5126	0.778465	1.23294
	0	11.15	27	3	24877	5123	0.906845	1.12791
	0	11.1667	27	3	24840	5160	0.909601	1.12401
	0	11.1833	28	2	24896	5104	0.973388	1.05169
	0	11.2	28	2	24908	5092	0.973067	1.05169
	0	11.2167	28	2	24975	5025	0.971204	1.05914
	0	11.2333	28	2	24984	5016	0.970945	1.05914
	0	11.25	29	1	24974	5026	0.995909	1.0125
	0	11.2667	28	2	24972	5028	0.97129	1.05914
	0	11.2833	28	2	24969	5031	0.971376	1.05914
	0	11.3	27	3	24951	5049	0.901118	1.13397
	0	11.3167	27	3	25030	4970	0.894674	1.1414
	0	11.3333	26	4	25111	4889	0.743572	1.27538
	0	11.35	25	5	25102	4898	0.555964	1.43271
	0	11.3667	25	5	25122	4878	0.552042	1.44229
	0	11.3833	23	7	25138	4862	0.202896	2.15923
	0	11.4	22	8	25115	4885	0.102608	2.47264
	0	11.4167	23	7	25080	4920	0.211527	2.09054
	0	11.4333	23	7	25052	4948	0.215749	2.09058
	0	11.45	23	7	25024	4976	0.220005	2.05186
	0	11.4667	23	7	25054	4946	0.215446	2.09058
	0	11.4833	24	6	25077	4923	0.36897	1.67081
	0	11.5	27	3	25063	4937	0.891878	1.14255
	0	11.5167	28	2	25077	4923	0.968139	1.06452
	0	11.5333	28	2	25071	4929	0.968327	1.06452
	0	11.55	28	2	25091	4909	0.967695	1.06666
	0	11.5667	28	2	25166	4834	0.965221	1.07031
	0	11.5833	28	2	25303	4697	0.960244	1.07439
	0	11.6	28	2	25299	4701	0.960398	1.07439
	0	11.6167	28	2	25343	4657	0.958672	1.07481
	0	11.6333	29	1	25342	4658	0.993657	1.01381
	0	11.65	30	0	25355	4645	1	1.0158
	0	11.6667	30	0	25384	4616	1	1.0158
	0	11.6833	29	1	25345	4655	0.993634	1.01381
	0	11.7	29	1	25385	4615	0.993326	1.01381
	0	11.7167	29	1	25462	4538	0.992692	1.01381
	0	11.7333	28	2	25434	4566	0.95488	1.0776
	0	11.75	28	2	25383	4617	0.957042	1.07747
	0	11.7667	28	2	25455	4545	0.953961	1.07945
	0	11.7833	25	5	25418	4582	0.492549	1.48632
	0	11.8	24	6	25396	4604	0.308767	1.77205
	0	11.8167	24	6	25403	4597	0.30747	1.79581
	0	11.8333	24	6	25422	4578	0.303956	1.83915
	0	11.85	24	6	25392	4608	0.309508	1.76582
	0	11.8667	24	6	25380	4620	0.311736	1.76905
	0	11.8833	24	6	25400	4600	0.308025	1.79581
	0	11.9	24	6	25330	4670	0.321055	1.76978
	0	11.9167	25	5	25324	4676	0.511709	1.46552
	0	11.9333	24	6	25276	4724	0.331184	1.75392
	0	11.95	25	5	25305	4695	0.515554	1.46372
	0	11.9667	25	5	25300	4700	0.516565	1.46371
	0	11.9833	27	3	25365	4635	0.863257	1.18116
	0	12	27	3	25338	4662	0.86605	1.17863
	0	12.0167	27	3	25341	4659	0.865742	1.17863
	0	12.0333	26	4	25358	4642	0.70331	1.30848
	0	12.05	25	5	25322	4678	0.512115	1.46552
	0	12.0667	27	3	25290	4710	0.870897	1.17117
	0	12.0833	27	3	25230	4770	0.876749	1.16193
	0	12.1	27	3	25199	4801	0.879685	1.1547
	0	12.1167	26	4	25185	4815	0.731928	1.28096
	0	12.1333	25	5	25197	4803	0.537215	1.44453
	0	12.15	25	5	25214	4786	0.533828	1.44495
	0	12.1667	26	4	25208	4792	0.728236	1.28741
	0	12.1833	25	5	25238	4762	0.529033	1.45106
	0	12.2	25	5	25231	4769	0.530433	1.44939
	0	12.2167	26	4	25170	4830	0.734317	1.28044
	0	12.2333	26	4	25207	4793	0.728397	1.28741
	0	12.25	25	5	25179	4821	0.54079	1.44639
	0	12.2667	24	6	25143	4857	0.356371	1.69476
	0	12.2833	23	7	25153	4847	0.20069	2.18666
	0	12.3	23	7	25125	4875	0.204817	2.11273
	0	12.3167	24	6	25142	4858	0.356562	1.69476
	0	12.3333	24	6	25120	4880	0.360755	1.69277
	0	12.35	24	6	25104	4896	0.363809	1.68696
	0	12.3667	25	5	24984	5016	0.578808	1.40025
	0	12.3833	25	5	24971	5029	0.581293	1.40071
	0	12.4	25	5	24898	5102	0.595119	1.3932
	0	12.4167	25	5	24936	5064	0.587949	1.39488
	0	12.4333	27	3	24880	5120	0.906619	1.12791
	0	12.45	27	3	24919	5081	0.90363	1.12905
	0	12.4667	27	3	24904	5096	0.904789	1.12824
	0	12.4833	27	3	24933	5067	0.902538	1.13255
	0	12.5	27	3	24935	5065	0.902381	1.13255
	0	12.5167	27	3	24963	5037	0.900161	1.13426
	0	12.5333	26	4	25020	4980	0.757401	1.26585
	0	12.55	26	4	24986	5014	0.76243	1.26171
	0	12.5667	26	4	24999	5001	0.760516	1.26604
	0	12.5833	27	3	24959	5041	0.900481	1.13426
	0	12.6	26	4	24941	5059	0.76897	1.25523
	0	12.6167	25	5	24931	5069	0.588896	1.39488
	0	12.6333	25	5	24875	5125	0.599431	1.39092
	0	12.65	26	4	24873	5127	0.778605	1.23294
	0	12.6667	26	4	24886	5114	0.776786	1.24051
	0	12.6833	26	4	24932	5068	0.770262	1.25336
	0	12.7	25	5	24936	5064	0.587949	1.39488
	0	12.7167	25	5	24967	5033	0.582056	1.40115
	0	12.7333	24	6	25001	4999	0.383537	1.66279
	0	12.75	24	6	24968	5032	0.389877	1.65319
	0	12.7667	23	7	24984	5016	0.226145	2.02943
	0	12.7833	26	4	24992	5008	0.761548	1.26171
	0	12.8	26	4	25042	4958	0.754107	1.27037
	0	12.8167	26	4	25050	4950	0.752902	1.2694
	0	12.8333	27	3	24986	5014	0.898306	1.1381
	0	12.85	26	4	24966	5034	0.765353	1.26042
	0	12.8667	26	4	24994	5006	0.761253	1.26171
	0	12.8833	25	5	24948	5052	0.585672	1.39669
	0	12.9	25	5	25015	4985	0.572857	1.41062
	0	12.9167	24	6	25005	4995	0.382769	1.66279
	0	12.9333	24	6	25005	4995	0.382769	1.66279
	0	12.95	24	6	25002	4998	0.383345	1.66279
	0	12.9667	24	6	25042	4958	0.375672	1.65941
	0	12.9833	25	5	25055	4945	0.565124	1.42476
	0	13	25	5	25068	4932	0.562598	1.4259
	0	13.0167	24	6	25108	4892	0.363045	1.68696
	0	13.0333	24	6	25119	4881	0.360946	1.69277
	0	13.05	24	6	25119	4881	0.360946	1.69277
	0	13.0667	23	7	25095	4905	0.20928	2.09929
	0	13.0833	24	6	25127	4873	0.35942	1.69582
	0	13.1	24	6	25120	4880	0.360755	1.69277
	0	13.1167	24	6	25165	4835	0.352185	1.71381
	0	13.1333	24	6	25203	4797	0.344971	1.72776
	0	13.15	24	6	25304	4696	0.325924	1.75933
	0	13.1667	25	5	25337	4663	0.509073	1.47373
	0	13.1833	26	4	25393	4607	0.697284	1.31429
	0	13.2	26	4	25344	4656	0.705699	1.30528
	0	13.2167	26	4	25343	4657	0.705869	1.30528
	0	13.2333	26	4	25352	4648	0.704335	1.30848
	0	13.25	26	4	25352	4648	0.704335	1.30848
	0	13.2667	26	4	25379	4621	0.699704	1.31278
	0	13.2833	27	3	25319	4681	0.867986	1.1757
	0	13.3	27	3	25246	4754	0.875211	1.16884
	0	13.3167	27	3	25282	4718	0.871691	1.17005
	0	13.3333	26	4	25283	4717	0.715956	1.30061
	0	13.35	26	4	25228	4772	0.724997	1.2908
	0	13.3667	26	4	25143	4857	0.73858	1.27913
	0	13.3833	27	3	25128	4872	0.886188	1.1488
	0	13.4	27	3	25069	4931	0.891363	1.14683
	0	13.4167	27	3	25051	4949	0.892902	1.14198
	0	13.4333	27	3	25074	4926	0.890933	1.14683
	0	13.45	27	3	25054	4946	0.892647	1.14198
	0	13.4667	27	3	25044	4956	0.893496	1.14104
	0	13.4833	28	2	25049	4951	0.969009	1.06452
	0	13.5	28	2	25053	4947	0.968886	1.06452
	0	13.5167	28	2	25041	4959	0.969254	1.06452
	0	13.5333	27	3	25053	4947	0.892732	1.14198
	0	13.55	27	3	25078	4922	0.890587	1.14683
	0	13.5667	28	2	25128	4872	0.966495	1.07031
	0	13.5833	28	2	25116	4884	0.966889	1.06666
	0	13.6	27	3	25100	4900	0.888669	1.14869
	0	13.6167	28	2	25134	4866	0.966297	1.07031
	0	13.6333	28	2	25135	4865	0.966264	1.07031
	0	13.65	27	3	25109	4891	0.887877	1.14878
	0	13.6667	28	2	25102	4898	0.967343	1.06666
	0	13.6833	28	2	25055	4945	0.968824	1.06452
	0	13.7	28	2	25002	4998	0.97042	1.05914
	0	13.7167	28	2	25036	4964	0.969406	1.06452
	0	13.7333	28	2	24988	5012	0.970829	1.05914
	0	13.75	28	2	24977	5023	0.971147	1.05914
	0	13.7667	27	3	24887	5113	0.906088	1.12791
	0	13.7833	27	3	24852	5148	0.908715	1.12534
	0	13.8	25	5	24809	5191	0.611678	1.37938
	0	13.8167	25	5	24760	5240	0.620648	1.36784
	0	13.8333	25	5	24746	5254	0.623191	1.36595
	0	13.85	25	5	24646	5354	0.641096	1.36082
	0	13.8667	25	5	24660	5340	0.638617	1.36198
	0	13.8833	25	5	24687	5313	0.633811	1.36242
	0	13.9	25	5	24686	5314	0.633989	1.36242
	0	13.9167	25	5	24678	5322	0.635416	1.35918
	0	13.9333	25	5	24640	5360	0.642155	1.35922
	0	13.95	25	5	24566	5434	0.655081	1.35748
	0	13.9667	24	6	24578	5422	0.464886	1.55098
	0	13.9833	24	6	24615	5385	0.457799	1.57109
	0	14	22	8	24601	5399	0.158298	2.29285
	0	14.0167	23	7	24579	5421	0.291781	1.8588
	0	14.0333	22	8	24568	5432	0.162329	2.27696
	0	14.05	22	8	24571	5429	0.16196	2.27696
	0	14.0667	22	8	24494	5506	0.171559	2.24586
	0	14.0833	21	9	24492	5508	0.0846305	2.89778
	0	14.1	23	7	24455	5545	0.312929	1.76905
	0	14.1167	22	8	24463	5537	0.175502	2.24586
	0	14.1333	21	9	24387	5613	0.0931129	2.67627
	0	14.15	22	8	24397	5603	0.184047	2.20238
	0	14.1667	21	9	24300	5700	0.100532	2.54444
	0	14.1833	21	9	24286	5714	0.10176	2.47264
	0	14.2	22	8	24299	5701	0.197098	2.21703
	0	14.2167	22	8	24280	5720	0.199677	2.18666
	0	14.2333	23	7	24291	5709	0.341461	1.72165
	0	14.25	25	5	24270	5730	0.704059	1.30848
	0	14.2667	23	7	24223	5777	0.353445	1.71381
	0	14.2833	24	6	24234	5766	0.529834	1.44939
	0	14.3	24	6	24249	5751	0.527048	1.45387
	0	14.3167	23	7	24296	5704	0.340583	1.73353
	0	14.3333	24	6	24330	5670	0.511921	1.46552
	0	14.35	24	6	24399	5601	0.498932	1.47589
	0	14.3667	23	7	24494	5506	0.306234	1.79581
	0	14.3833	25	5	24455	5545	0.673967	1.34588
	0	14.4	26	4	24426	5574	0.834701	1.20728
	0	14.4167	25	5	24360	5640	0.68964	1.32694
	0	14.4333	24	6	24338	5662	0.510419	1.46649
	0	14.45	24	6	24368	5632	0.504778	1.47329
	0	14.4667	24	6	24392	5608	0.500254	1.4761
	0	14.4833	25	5	24408	5592	0.681779	1.34162
	0	14.5	26	4	24453	5547	0.831658	1.20773
	0	14.5167	27	3	24500	5500	0.931801	1.09338
	0	14.5333	27	3	24578	5422	0.927179	1.10669
	0	14.55	27	3	24569	5431	0.927726	1.10669
	0	14.5667	28	2	24580	5420	0.980677	1.03532
	0	14.5833	28	2	24660	5340	0.979032	1.04094
	0	14.6	28	2	24696	5304	0.97825	1.04094
	0	14.6167	28	2	24655	5345	0.979138	1.04094
	0	14.6333	27	3	24623	5377	0.92439	1.10669
	0	14.65	27	3	24588	5412	0.926567	1.10669
	0	14.6667	27	3	24574	5426	0.927422	1.10669
	0	14.6833	27	3	24593	5407	0.926259	1.10669
	0	14.7	26	4	24596	5404	0.814818	1.21217
	0	14.7167	25	5	24574	5426	0.653696	1.35826
	0	14.7333	25	5	24622	5378	0.645323	1.3554
	0	14.75	25	5	24627	5373	0.644445	1.35533
	0	14.7667	24	6	24689	5311	0.443592	1.60622
	0	14.7833	24	6	24661	5339	0.448972	1.59398
	0	14.8	24	6	24633	5367	0.454347	1.58209
	0	14.8167	24	6	24653	5347	0.450509	1.59224
	0	14.8333	24	6	24691	5309	0.443207	1.60622
	0	14.85	23	7	24698	5302	0.271901	1.89375
	0	14.8667	24	6	24693	5307	0.442823	1.60622
	0	14.8833	23	7	24749	5251	0.263521	1.89735
	0	14.9	24	6	24785	5215	0.425115	1.63432
	0	14.9167	24	6	24818	5182	0.418757	1.64549
	0	14.9333	23	7	24889	5111	0.240995	1.94532
	0	14.95	23	7	24918	5082	0.236423	1.98285
	0	14.9667	21	9	24828	5172	0.0609007	3.98549
	0	14.9833	21	9	24800	5200	0.0626834	3.8668
	0	15	22	8	24787	5213	0.136583	2.35138
	0	15.0167	21	9	24790	5210	0.0633286	3.8668
	0	15.0333	24	6	24717	5283	0.438207	1.61271
	0	15.05	25	5	24731	5269	0.625906	1.364
	0	15.0667	26	4	24720	5280	0.799203	1.22183
	0	15.0833	26	4	24767	5233	0.793033	1.22454
	0	15.1	25	5	24778	5222	0.617365	1.37397
	0	15.1167	25	5	24815	5185	0.610572	1.38156
	0	15.1333	27	3	24874	5126	0.907071	1.12791
	0	15.15	26	4	24922	5078	0.771692	1.25336
	0	15.1667	27	3	24991	5009	0.897898	1.1381
	0	15.1833	27	3	25006	4994	0.896668	1.13923
	0	15.2	27	3	25061	4939	0.89205	1.14255
	0	15.2167	27	3	25084	4916	0.890067	1.14683
	0	15.2333	28	2	25210	4790	0.963689	1.07171
	0	15.25	28	2	25236	4764	0.962754	1.07171
	0	15.2667	29	1	25149	4851	0.994956	1.01298
	0	15.2833	29	1	25191	4809	0.994697	1.01298
	0	15.3	29	1	25127	4873	0.995087	1.01298
	0	15.3167	29	1	25158	4842	0.994902	1.01298
	0	15.3333	29	1	25192	4808	0.994691	1.01298
	0	15.35	30	0	25235	4765	1	1.0158
	0	15.3667	30	0	25224	4776	1	1.0158
	0	15.3833	30	0	25219	4781	1	1.0158
	0	15.4	30	0	25257	4743	1	1.0158
	0	15.4167	29	1	25325	4675	0.993783	1.01381
	0	15.4333	29	1	25344	4656	0.993642	1.01381
	0	15.45	28	2	25392	4608	0.956668	1.07747
	0	15.4667	27	3	25337	4663	0.866152	1.17863
	0	15.4833	26	4	25355	4645	0.703823	1.30848
	0	15.5	26	4	25316	4684	0.710437	1.30498
	0	15.5167	25	5	25301	4699	0.516363	1.46371
	0	15.5333	24	6	25232	4768	0.339482	1.73353
	0	15.55	24	6	25201	4799	0.34535	1.72776
	0	15.5667	23	7	25175	4825	0.197473	2.21703
	0	15.5833	22	8	25192	4808	0.095451	2.59744
	0	15.6	22	8	25166	4834	0.0978327	2.55216
	0	15.6167	23	7	25098	4902	0.208832	2.09929
	0	15.6333	23	7	25096	4904	0.209131	2.09929
	0	15.65	23	7	25131	4869	0.20393	2.15923
	0	15.6667	24	6	25111	4889	0.362473	1.68696
	0	15.6833	23	7	25120	4880	0.205558	2.11273
	0	15.7	22	8	25143	4857	0.0999694	2.54444
	0	15.7167	23	7	25182	4818	0.196454	2.21703
	0	15.7333	25	5	25239	4761	0.528833	1.45106
	0	15.75	25	5	25259	4741	0.524822	1.45813
	0	15.7667	26	4	25279	4721	0.71662	1.30061
	0	15.7833	26	4	25299	4701	0.713289	1.30411
	0	15.8	27	3	25262	4738	0.873656	1.16884
	0	15.8167	27	3	25275	4725	0.872381	1.16884
	0	15.8333	28	2	25353	4647	0.95827	1.07469
	0	15.85	28	2	25475	4525	0.95307	1.08266
	0	15.8667	28	2	25449	4551	0.954225	1.07945
	0	15.8833	28	2	25473	4527	0.953159	1.08266
	0	15.9	27	3	25487	4513	0.850032	1.19349
	0	15.9167	27	3	25497	4503	0.848903	1.19656
	0	15.9333	27	3	25449	4551	0.85426	1.19138
	0	15.95	27	3	25466	4534	0.85238	1.19322
	0	15.9667	26	4	25492	4508	0.679811	1.34321
	0	15.9833	26	4	25530	4470	0.672938	1.34588
	0	16	27	3	25564	4436	0.841157	1.20457
	0	16.0167	26	4	25534	4466	0.672209	1.3467
	0	16.0333	25	5	25522	4478	0.47112	1.54465
	0	16.05	26	4	25517	4483	0.6753	1.34314
	0	16.0667	26	4	25465	4535	0.684639	1.33588
	0	16.0833	26	4	25480	4520	0.681962	1.34162
	0	16.1	26	4	25431	4569	0.690652	1.3275
	0	16.1167	26	4	25404	4596	0.695374	1.31831
	0	16.1333	26	4	25404	4596	0.695374	1.31831
	0	16.15	27	3	25324	4676	0.867479	1.1757
	0	16.1667	26	4	25289	4711	0.714958	1.30221
	0	16.1833	25	5	25301	4699	0.516363	1.46371
	0	16.2	24	6	25187	4813	0.348005	1.72565
	0	16.2167	23	7	25110	4890	0.207043	2.10507
	0	16.2333	24	6	25126	4874	0.359611	1.69582
	0	16.25	26	4	25170	4830	0.734317	1.28044
	0	16.2667	25	5	25119	4881	0.552631	1.44229
	0	16.2833	25	5	25037	4963	0.568611	1.41709
	0	16.3	25	5	25000	5000	0.575741	1.40919
	0	16.3167	26	4	25016	4984	0.757997	1.26567
	0	16.3333	27	3	25025	4975	0.895092	1.1414
	0	16.35	27	3	25019	4981	0.895592	1.14007
	0	16.3667	27	3	24981	5019	0.898711	1.1381
	0	16.3833	25	5	24944	5056	0.586432	1.39534
	0	16.4	26	4	24878	5122	0.777906	1.24051
	0	16.4167	25	5	24813	5187	0.610941	1.38156
	0	16.4333	24	6	24857	5143	0.411243	1.64025
	0	16.45	23	7	24836	5164	0.249437	1.93942
	0	16.4667	25	5	24825	5175	0.608726	1.38172
	0	16.4833	24	6	24851	5149	0.412399	1.64048
	0	16.5	24	6	24802	5198	0.42184	1.63469
	0	16.5167	23	7	24811	5189	0.253456	1.91689
	0	16.5333	22	8	24818	5182	0.133133	2.39489
	0	16.55	21	9	24781	5219	0.063913	3.8668
	0	16.5667	21	9	24806	5194	0.0622985	3.8668
	0	16.5833	23	7	24892	5108	0.240521	1.94532
	0	16.6	24	6	24866	5134	0.40951	1.63804
	0	16.6167	24	6	24942	5058	0.394877	1.65565
	0	16.6333	23	7	24926	5074	0.235167	1.98285
	0	16.65	23	7	24900	5100	0.239257	1.95805
	0	16.6667	23	7	24917	5083	0.23658	1.98285
	0	16.6833	23	7	24921	5079	0.235952	1.98285
	0	16.7	24	6	24908	5092	0.401421	1.6451
	0	16.7167	24	6	24881	5119	0.40662	1.64367
	0	16.7333	24	6	24938	5062	0.395647	1.65565
	0	16.75	24	6	24944	5056	0.394493	1.65565
	0	16.7667	25	5	24998	5002	0.576125	1.40919
	0	16.7833	25	5	25033	4967	0.569385	1.41709
	0	16.8	25	5	25037	4963	0.568611	1.41709
	0	16.8167	25	5	25108	4892	0.554789	1.4348
	0	16.8333	24	6	25184	4816	0.348575	1.72565
	0	16.85	25	5	25206	4794	0.535423	1.44383
	0	16.8667	25	5	25291	4709	0.518381	1.4608
	0	16.8833	26	4	25320	4680	0.709763	1.30498
	0	16.9	25	5	25323	4677	0.511912	1.46552
	0	16.9167	24	6	25426	4574	0.303218	1.83915
	0	16.9333	25	5	25491	4509	0.47753	1.53981
	0	16.95	25	5	25472	4528	0.48145	1.51443
	0	16.9667	24	6	25488	4512	0.29183	1.8588
	0	16.9833	24	6	25459	4541	0.297142	1.85392
	0	17	24	6	25412	4588	0.305804	1.79581
	0	17.0167	23	7	25349	4651	0.172869	2.24586
	0	17.0333	23	7	25353	4647	0.172322	2.24586
	0	17.05	23	7	25386	4614	0.167838	2.28502
	0	17.0667	20	10	25456	4544	0.0103817	33.5588
	0	17.0833	22	8	25563	4437	0.0653403	3.8668
	0	17.1	23	7	25640	4360	0.135314	2.34851
	0	17.1167	24	6	25650	4350	0.262652	1.90825
	0	17.1333	25	5	25656	4344	0.443231	1.60622
	0	17.15	25	5	25648	4352	0.444903	1.59686
	0	17.1667	26	4	25632	4368	0.65404	1.35826
	0	17.1833	27	3	25657	4343	0.829872	1.2066
	0	17.2	26	4	25676	4324	0.645689	1.3554
	0	17.2167	27	3	25693	4307	0.825333	1.206
	0	17.2333	27	3	25637	4363	0.832352	1.20777
	0	17.25	27	3	25599	4401	0.836983	1.20526
	0	17.2667	27	3	25580	4420	0.83926	1.2042
	0	17.2833	25	5	25603	4397	0.454292	1.58209
	0	17.3	24	6	25544	4456	0.281644	1.86725
	0	17.3167	26	4	25564	4436	0.666711	1.35014
	0	17.3333	26	4	25564	4436	0.666711	1.35014
	0	17.35	24	6	25576	4424	0.275869	1.88092
	0	17.3667	25	5	25479	4521	0.480006	1.51584
	0	17.3833	25	5	25444	4556	0.487213	1.49401
	0	17.4	24	6	25346	4654	0.318066	1.76977
	0	17.4167	25	5	25257	4743	0.525224	1.45813
	0	17.4333	25	5	25185	4815	0.539599	1.44752
	0	17.45	22	8	25193	4807	0.0953601	2.59744
	0	17.4667	22	8	25251	4749	0.090179	2.76338
	0	17.4833	21	9	25273	4727	0.0370432	3.6847
	0	17.5	22	8	25258	4742	0.0895657	2.76338
	0	17.5167	22	8	25215	4785	0.0933739	2.67627
	0	17.5333	22	8	25220	4780	0.0929261	2.67627
	0	17.55	23	7	25294	4706	0.180481	2.22446
	0	17.5667	21	9	25339	4661	0.0341822	6.82845
	0	17.5833	22	8	25289	4711	0.0868808	2.8846
	0	17.6	24	6	25262	4738	0.333821	1.75392
	0	17.6167	24	6	25268	4732	0.33269	1.75392
	0	17.6333	24	6	25289	4711	0.32874	1.75588
	0	17.65	23	7	25249	4751	0.186824	2.19793
	0	17.6667	23	7	25240	4760	0.188105	2.20077
	0	17.6833	24	6	25288	4712	0.328928	1.75588
	0	17.7	25	5	25226	4774	0.531433	1.44643
	0	17.7167	25	5	25248	4752	0.527029	1.45387
	0	17.7333	26	4	25245	4755	0.722224	1.29301
	0	17.75	25	5	25252	4748	0.526227	1.45277
	0	17.7667	24	6	25238	4762	0.338349	1.73848
	0	17.7833	24	6	25179	4821	0.349524	1.72565
	0	17.8	24	6	25180	4820	0.349334	1.72565
	0	17.8167	26	4	25083	4917	0.747885	1.27143
	0	17.8333	25	5	25019	4981	0.572086	1.41062
	0	17.85	25	5	24989	5011	0.577851	1.40919
	0	17.8667	25	5	24929	5071	0.589274	1.39488
	0	17.8833	25	5	24884	5116	0.597746	1.3918
	0	17.9	26	4	24894	5106	0.775661	1.24051
	0	17.9167	27	3	24949	5051	0.901276	1.13397
	0	17.9333	27	3	24939	5061	0.902066	1.13255
	0	17.95	26	4	24921	5079	0.771835	1.25336
	0	17.9667	26	4	24912	5088	0.773115	1.25336
	0	17.9833	27	3	24942	5058	0.90183	1.13255
	0	18	27	3	24898	5102	0.905249	1.12824
	0	18.0167	26	4	24928	5072	0.770835	1.25336
	0	18.0333	27	3	24981	5019	0.898711	1.1381
	0	18.05	25	5	25034	4966	0.569191	1.41709
	0	18.0667	25	5	25121	4879	0.552238	1.44229
	0	18.0833	25	5	25170	4830	0.542574	1.44795
	0	18.1	25	5	25292	4708	0.51818	1.4608
	0	18.1167	25	5	25413	4587	0.493574	1.4855
	0	18.1333	25	5	25493	4507	0.477117	1.53981
	0	18.15	26	4	25577	4423	0.664311	1.35267
	0	18.1667	27	3	25594	4406	0.837585	1.20468
	0	18.1833	24	6	25666	4334	0.259821	1.91672
	0	18.2	25	5	25724	4276	0.428994	1.62566
	0	18.2167	24	6	25756	4244	0.244086	1.93976
	0	18.2333	25	5	25823	4177	0.408207	1.63927
	0	18.25	25	5	25866	4134	0.399169	1.64794
	0	18.2667	25	5	25830	4170	0.406736	1.64367
	0	18.2833	25	5	25770	4230	0.419342	1.64549
	0	18.3	25	5	25742	4258	0.425218	1.63432
	0	18.3167	25	5	25717	4283	0.430461	1.62566
	0	18.3333	25	5	25694	4306	0.43528	1.61547
	0	18.35	25	5	25724	4276	0.428994	1.62566
	0	18.3667	25	5	25682	4318	0.437793	1.61271
	0	18.3833	25	5	25659	4341	0.442604	1.60622
	0	18.4	26	4	25672	4328	0.646453	1.35425
	0	18.4167	26	4	25684	4316	0.644158	1.35533
	0	18.4333	26	4	25688	4312	0.643391	1.35609
	0	18.45	28	2	25684	4316	0.942764	1.08361
	0	18.4667	27	3	25642	4358	0.831735	1.20773
	0	18.4833	27	3	25606	4394	0.836138	1.205
	0	18.5	27	3	25599	4401	0.836983	1.20526
	0	18.5167	28	2	25607	4393	0.94678	1.08307
	0	18.5333	28	2	25584	4416	0.947928	1.08317
	0	18.55	27	3	25557	4443	0.841981	1.20094
	0	18.5667	27	3	25552	4448	0.842567	1.19796
	0	18.5833	25	5	25507	4493	0.474224	1.5449
	0	18.6	25	5	25474	4526	0.481038	1.51443
	0	18.6167	25	5	25475	4525	0.480831	1.51443
	0	18.6333	24	6	25448	4552	0.299164	1.85315
	0	18.65	23	7	25420	4580	0.163278	2.26077
	0	18.6667	23	7	25434	4566	0.161419	2.27696
	0	18.6833	23	7	25398	4602	0.166221	2.28396
	0	18.7	24	6	25448	4552	0.299164	1.85315
	0	18.7167	23	7	25470	4530	0.156686	2.28833
	0	18.7333	22	8	25539	4461	0.0670713	3.8668
	0	18.75	21	9	25520	4480	0.0271558	6.82845
	0	18.7667	21	9	25524	4476	0.0270136	6.82845
	0	18.7833	21	9	25521	4479	0.0271202	6.82845
	0	18.8	21	9	25505	4495	0.0276941	6.82845
	0	18.8167	20	10	25526	4474	0.00932188	33.5588
	0	18.8333	21	9	25481	4519	0.0285714	6.82845
	0	18.85	21	9	25519	4481	0.0271914	6.82845
	0	18.8667	23	7	25497	4503	0.153183	2.26938
	0	18.8833	24	6	25491	4509	0.291281	1.8588
	0	18.9	24	6	25451	4549	0.298612	1.85315
	0	18.9167	25	5	25454	4546	0.485157	1.50449
	0	18.9333	26	4	25408	4592	0.694677	1.31831
	0	18.95	26	4	25421	4579	0.692406	1.32175
	0	18.9667	25	5	25422	4578	0.491729	1.48705
	0	18.9833	24	6	25363	4637	0.314898	1.76194
	0	19	24	6	25309	4691	0.324987	1.75933
	0	19.0167	26	4	25245	4755	0.722224	1.29301
	0	19.0333	26	4	25188	4812	0.731448	1.28172
	0	19.05	26	4	25197	4803	0.730006	1.28234
	0	19.0667	26	4	25146	4854	0.738109	1.27913
	0	19.0833	26	4	25126	4874	0.741241	1.27734
	0	19.1	27	3	25081	4919	0.890327	1.14683
	0	19.1167	26	4	25102	4898	0.744964	1.27344
	0	19.1333	24	6	25117	4883	0.361328	1.69277
	0	19.15	27	3	25099	4901	0.888757	1.14869
	0	19.1667	26	4	25087	4913	0.747272	1.27143
	0	19.1833	26	4	25058	4942	0.751692	1.26927
	0	19.2	25	5	25059	4941	0.564348	1.42476
	0	19.2167	25	5	25000	5000	0.575741	1.40919
	0	19.2333	25	5	24968	5032	0.581865	1.40115
	0	19.25	26	4	24912	5088	0.773115	1.25336
	0	19.2667	26	4	24900	5100	0.774815	1.24293
	0	19.2833	27	3	24952	5048	0.901038	1.13397
	0	19.3	26	4	24906	5094	0.773966	1.25336
	0	19.3167	25	5	24856	5144	0.602975	1.38709
	0	19.3333	23	7	24839	5161	0.248956	1.93942
	0	19.35	23	7	24805	5195	0.254424	1.92018
	0	19.3667	23	7	24820	5180	0.252006	1.91802
	0	19.3833	23	7	24776	5224	0.259121	1.92477
	0	19.4	23	7	24746	5254	0.264011	1.89735
	0	19.4167	22	8	24676	5324	0.149334	2.30731
	0	19.4333	23	7	24633	5367	0.282705	1.86725
	0	19.45	22	8	24532	5468	0.166786	2.28396
	0	19.4667	22	8	24489	5511	0.172192	2.24586
	0	19.4833	22	8	24423	5577	0.180657	2.22446
	0	19.5	24	6	24452	5548	0.488899	1.49156
	0	19.5167	24	6	24416	5584	0.495719	1.48451
	0	19.5333	25	5	24540	5460	0.659559	1.35526
	0	19.55	28	2	24533	5467	0.981587	1.03385
	0	19.5667	28	2	24598	5402	0.980318	1.03524
	0	19.5833	27	3	24642	5358	0.923184	1.10819
	0	19.6	27	3	24749	5251	0.916081	1.11898
	0	19.6167	26	4	24722	5278	0.798943	1.22183
	0	19.6333	25	5	24746	5254	0.623191	1.36595
	0	19.65	24	6	24793	5207	0.423574	1.63343
	0	19.6667	25	5	24835	5165	0.606875	1.38321
	0	19.6833	25	5	24794	5206	0.614435	1.37989
	0	19.7	25	5	24851	5149	0.603906	1.38475
	0	19.7167	25	5	24832	5168	0.607431	1.38314
	0	19.7333	25	5	24793	5207	0.614618	1.37989
	0	19.75	24	6	24819	5181	0.418565	1.64549
	0	19.7667	24	6	24821	5179	0.418179	1.64549
	0	19.7833	24	6	24781	5219	0.425885	1.63432
	0	19.8	24	6	24944	5056	0.394493	1.65565
	0	19.8167	23	7	24970	5030	0.22831	2.01395
	0	19.8333	23	7	25003	4997	0.22322	2.05239
	0	19.85	24	6	25054	4946	0.373372	1.66942
	0	19.8667	25	5	25108	4892	0.554789	1.4348
	0	19.8833	26	4	25166	4834	0.734952	1.28044
	0	19.9	27	3	25201	4799	0.879497	1.1547
	0	19.9167	28	2	25263	4737	0.961761	1.07439
	0	19.9333	28	2	25293	4707	0.960628	1.07439
	0	19.95	28	2	25332	4668	0.959109	1.07481
	0	19.9667	27	3	25376	4624	0.862106	1.18324
	0	19.9833	26	4	25362	4638	0.702625	1.3106
	0	20	28	2	25374	4626	0.957414	1.07474
	0	20.0167	27	3	25459	4541	0.853157	1.19168
	0	20.0333	26	4	25461	4539	0.68535	1.33588
	0	20.05	27	3	25443	4557	0.854918	1.19138
	0	20.0667	27	3	25491	4509	0.849581	1.19379
	0	20.0833	27	3	25499	4501	0.848676	1.19656
	0	20.1	28	2	25465	4535	0.953517	1.07945
	0	20.1167	27	3	25460	4540	0.853046	1.19168
	0	20.1333	26	4	25454	4546	0.686592	1.33315
	0	20.15	27	3	25514	4486	0.846967	1.1976
	0	20.1667	27	3	25467	4533	0.852269	1.19322
	0	20.1833	26	4	25507	4493	0.677109	1.34465
	0	20.2	26	4	25573	4427	0.665051	1.35112
	0	20.2167	25	5	25490	4510	0.477736	1.53981
	0	20.2333	25	5	25495	4505	0.476704	1.53981
	0	20.25	24	6	25584	4416	0.274431	1.87823
	0	20.2667	24	6	25621	4379	0.267808	1.88915
	0	20.2833	24	6	25625	4375	0.267095	1.894
	0	20.3	25	5	25591	4409	0.456792	1.57493
	0	20.3167	26	4	25595	4405	0.66097	1.35417
	0	20.3333	26	4	25576	4424	0.664496	1.35267
	0	20.35	26	4	25546	4454	0.670017	1.34832
	0	20.3667	26	4	25564	4436	0.666711	1.35014
	0	20.3833	28	2	25525	4475	0.950772	1.08303
	0	20.4	28	2	25502	4498	0.951841	1.08266
	0	20.4167	28	2	25478	4522	0.952934	1.08266
	0	20.4333	28	2	25498	4502	0.952025	1.08266
	0	20.45	26	4	25549	4451	0.669467	1.34832
	0	20.4667	26	4	25555	4445	0.668366	1.34872
	0	20.4833	26	4	25516	4484	0.675481	1.34314
	0	20.5	26	4	25472	4528	0.683391	1.33925
	0	20.5167	25	5	25512	4488	0.473189	1.5449
	0	20.5333	25	5	25456	4544	0.484745	1.50449
	0	20.55	25	5	25491	4509	0.47753	1.53981
	0	20.5667	25	5	25502	4498	0.475257	1.53981
	0	20.5833	25	5	25579	4421	0.459289	1.57204
	0	20.6	25	5	25560	4440	0.463238	1.55495
	0	20.6167	26	4	25507	4493	0.677109	1.34465
	0	20.6333	26	4	25524	4476	0.674029	1.34588
	0	20.65	27	3	25497	4503	0.848903	1.19656
	0	20.6667	27	3	25510	4490	0.847424	1.1976
	0	20.6833	27	3	25491	4509	0.849581	1.19379
	0	20.7	26	4	25499	4501	0.678552	1.34293
	0	20.7167	28	2	25462	4538	0.953651	1.07945
	0	20.7333	26	4	25426	4574	0.69153	1.3235
	0	20.75	25	5	25464	4536	0.483098	1.50863
	0	20.7667	25	5	25329	4671	0.510696	1.46649
	0	20.7833	27	3	25278	4722	0.872086	1.16884
	0	20.8	27	3	25248	4752	0.875018	1.16884
	0	20.8167	26	4	25268	4732	0.718441	1.30061
	0	20.8333	27	3	25278	4722	0.872086	1.16884
	0	20.85	28	2	25285	4715	0.960933	1.07439
	0	20.8667	27	3	25317	4683	0.868189	1.1757
	0	20.8833	27	3	25265	4735	0.873363	1.16884
	0	20.9	26	4	25277	4723	0.716952	1.30061
	0	20.9167	26	4	25271	4729	0.717945	1.30061
	0	20.9333	27	3	25342	4658	0.865639	1.17863
	0	20.95	26	4	25393	4607	0.697284	1.31429
	0	20.9667	27	3	25417	4583	0.857743	1.18645
	0	20.9833	24	6	25507	4493	0.288363	1.85376
	0	21	25	5	25489	4511	0.477943	1.53981
	0	21.0167	24	6	25510	4490	0.287816	1.85356
	0	21.0333	25	5	25619	4381	0.450957	1.59224
	0	21.05	24	6	25609	4391	0.269951	1.8907
	0	21.0667	25	5	25659	4341	0.442604	1.60622
	0	21.0833	25	5	25722	4278	0.429413	1.62566
	0	21.1	26	4	25812	4188	0.619139	1.36826
	0	21.1167	27	3	25823	4177	0.808131	1.21736
	0	21.1333	26	4	25882	4118	0.605052	1.38385
	0	21.15	26	4	25895	4105	0.602405	1.38709
	0	21.1667	26	4	25962	4038	0.588616	1.39488
	0	21.1833	26	4	25981	4019	0.584662	1.3972
	0	21.2	27	3	25960	4040	0.788578	1.22856
	0	21.2167	26	4	25992	4008	0.582364	1.40115
	0	21.2333	27	3	26049	3951	0.775068	1.24293
	0	21.25	27	3	26025	3975	0.778775	1.23294
	0	21.2667	27	3	26033	3967	0.777545	1.24051
	0	21.2833	28	2	26044	3956	0.920083	1.11288
	0	21.3	28	2	26096	3904	0.916208	1.11898
	0	21.3167	28	2	26138	3862	0.912956	1.122
	0	21.3333	28	2	26134	3866	0.913271	1.122
	0	21.35	28	2	26117	3883	0.914596	1.12125
	0	21.3667	27	3	26084	3916	0.769577	1.25523
	0	21.3833	27	3	26121	3879	0.763662	1.26051
	0	21.4	27	3	26086	3914	0.76926	1.25523
	0	21.4167	27	3	26050	3950	0.774913	1.24293
	0	21.4333	27	3	26072	3928	0.771471	1.25336
	0	21.45	29	1	26095	3905	0.984739	1.03078
	0	21.4667	29	1	26101	3899	0.984633	1.03078
	0	21.4833	29	1	26082	3918	0.984965	1.03078
	0	21.5	29	1	26004	3996	0.986256	1.02447
	0	21.5167	29	1	25962	4038	0.986907	1.02447
	0	21.5333	29	1	25926	4074	0.98744	1.02447
	0	21.55	29	1	25919	4081	0.987541	1.02447
	0	21.5667	29	1	25884	4116	0.988036	1.02447
	0	21.5833	29	1	25881	4119	0.988078	1.02447
	0	21.6	29	1	25883	4117	0.98805	1.02447
	0	21.6167	29	1	25861	4139	0.988351	1.02447
	0	21.6333	29	1	25864	4136	0.98831	1.02447
	0	21.65	29	1	25824	4176	0.98884	1.02447
	0	21.6667	29	1	25770	4230	0.989519	1.0147
	0	21.6833	28	2	25775	4225	0.937664	1.08803
	0	21.7	28	2	25761	4239	0.938474	1.08803
	0	21.7167	28	2	25770	4230	0.937954	1.08803
	0	21.7333	25	5	25845	4155	0.403583	1.64541
	0	21.75	25	5	25834	4166	0.405895	1.64367
	0	21.7667	26	4	25834	4166	0.614742	1.37989
	0	21.7833	26	4	25829	4171	0.615743	1.37426
	0	21.8	27	3	25825	4175	0.807856	1.21736
	0	21.8167	25	5	25898	4102	0.392442	1.6535
	0	21.8333	25	5	25942	4058	0.383197	1.66279
	0	21.85	26	4	25964	4036	0.588201	1.39488
	0	21.8667	26	4	25987	4013	0.583409	1.39832
	0	21.8833	26	4	26030	3970	0.574376	1.40855
	0	21.9	25	5	26025	3975	0.365786	1.67504
	0	21.9167	24	6	26010	3990	0.201635	2.15923
	0	21.9333	25	5	26039	3961	0.362855	1.68696
	0	21.95	26	4	26060	3940	0.568017	1.41709
	0	21.9667	26	4	26121	3879	0.554949	1.4348
	0	21.9833	26	4	26156	3844	0.54737	1.44467
	0	22	25	5	26096	3904	0.350943	1.71381
	0	22.0167	25	5	26086	3914	0.35303	1.71381
	0	22.0333	25	5	26021	3979	0.366624	1.67281
	0	22.05	25	5	26074	3926	0.355536	1.69427
	0	22.0667	25	5	26032	3968	0.36432	1.67504
	0	22.0833	25	5	26040	3960	0.362646	1.68696
	0	22.1	26	4	26034	3966	0.573531	1.40936
	0	22.1167	26	4	26025	3975	0.575431	1.40919
	0	22.1333	27	3	26008	3992	0.781372	1.23051
	0	22.15	27	3	26035	3965	0.777236	1.24051
	0	22.1667	28	2	26009	3991	0.922599	1.11039
	0	22.1833	28	2	26006	3994	0.922811	1.11039
	0	22.2	28	2	26066	3934	0.918464	1.11574
	0	22.2167	27	3	26026	3974	0.778622	1.23294
	0	22.2333	28	2	26082	3918	0.917268	1.11635
	0	22.25	29	1	26089	3911	0.984844	1.03078
	0	22.2667	28	2	26076	3924	0.917718	1.11635
	0	22.2833	28	2	26082	3918	0.917268	1.11635
	0	22.3	28	2	26103	3897	0.915674	1.11898
	0	22.3167	27	3	26115	3885	0.764629	1.26042
	0	22.3333	27	3	26139	3861	0.760743	1.26604
	0	22.35	27	3	26091	3909	0.768467	1.25671
	0	22.3667	27	3	26108	3892	0.765753	1.26042
	0	22.3833	27	3	26061	3939	0.773197	1.25336
	0	22.4	28	2	26061	3939	0.918834	1.11574
	0	22.4167	28	2	26064	3936	0.918612	1.11574
	0	22.4333	27	3	25971	4029	0.786943	1.2286
	0	22.45	27	3	25971	4029	0.786943	1.2286
	0	22.4667	27	3	25954	4046	0.789466	1.22715
	0	22.4833	27	3	25962	4038	0.788282	1.22856
	0	22.5	27	3	25932	4068	0.792696	1.22454
	0	22.5167	27	3	25929	4071	0.793133	1.22454
	0	22.5333	27	3	25876	4124	0.800743	1.22183
	0	22.55	27	3	25850	4150	0.804395	1.21973
	0	22.5667	27	3	25879	4121	0.800318	1.22183
	0	22.5833	28	2	25894	4106	0.930371	1.09774
	0	22.6	29	1	25877	4123	0.988133	1.02447
	0	22.6167	29	1	25924	4076	0.987469	1.02447
	0	22.6333	29	1	25980	4020	0.986632	1.02447
	0	22.65	29	1	25977	4023	0.986678	1.02447
	0	22.6667	29	1	26012	3988	0.986129	1.02447
	0	22.6833	29	1	26038	3962	0.985707	1.03078
	0	22.7	29	1	26045	3955	0.985592	1.03078
	0	22.7167	29	1	26130	3870	0.984113	1.03078
	0	22.7333	28	2	26181	3819	0.90951	1.12401
	0	22.75	28	2	26181	3819	0.90951	1.12401
	0	22.7667	27	3	26260	3740	0.740411	1.27734
	0	22.7833	27	3	26205	3795	0.749806	1.26997
	0	22.8	28	2	26149	3851	0.912086	1.12228
	0	22.8167	27	3	26146	3854	0.7596	1.26604
	0	22.8333	27	3	26162	3838	0.756973	1.2685
	0	22.85	26	4	26112	3888	0.556889	1.43271
	0	22.8667	26	4	26095	3905	0.560541	1.42658
	0	22.8833	26	4	26081	3919	0.563539	1.42468
	0	22.9	25	5	26092	3908	0.351778	1.71381
	0	22.9167	25	5	26134	3866	0.343026	1.72231
	0	22.9333	26	4	26161	3839	0.546283	1.44619
	0	22.95	26	4	26114	3886	0.556458	1.43271
	0	22.9667	25	5	26086	3914	0.35303	1.71381
	0	22.9833	25	5	26088	3912	0.352612	1.71381
	0	23	25	5	26050	3950	0.360553	1.69277
	0	23.0167	26	4	26083	3917	0.563111	1.4256
	0	23.0333	26	4	26162	3838	0.546065	1.44619
	0	23.05	26	4	26124	3876	0.554302	1.43599
	0	23.0667	25	5	26170	3830	0.335547	1.73486
	0	23.0833	24	6	26161	3839	0.177977	2.22586
	0	23.1	24	6	26144	3856	0.180576	2.22446
	0	23.1167	24	6	26209	3791	0.170731	2.27335
	0	23.1333	24	6	26229	3771	0.167752	2.28502
	0	23.15	23	7	26169	3831	0.0797141	3.03926
	0	23.1667	22	8	26176	3824	0.0306592	6.82845
	0	23.1833	22	8	26169	3831	0.0309582	6.82845
	0	23.2	22	8	26143	3857	0.0320872	6.82845
	0	23.2167	21	9	26092	3908	0.0118101	33.5588
	0	23.2333	21	9	26021	3979	0.0132231	33.5588
	0	23.25	22	8	25963	4037	0.0407136	3.6223
	0	23.2667	22	8	25949	4051	0.0414457	3.6223
	0	23.2833	21	9	25930	4070	0.015219	6.83815
	0	23.3	21	9	25931	4069	0.0151959	6.83815
	0	23.3167	23	7	25960	4040	0.0996572	2.54444
	0	23.3333	24	6	25938	4062	0.21335	2.09852
	0	23.35	28	2	25950	4050	0.926679	1.10669
	0	23.3667	28	2	25918	4082	0.92881	1.09774
	0	23.3833	28	2	25914	4086	0.929072	1.09774
	0	23.4	28	2	25897	4103	0.930178	1.09774
	0	23.4167	28	2	25915	4085	0.929007	1.09774
	0	23.4333	27	3	25932	4068	0.792696	1.22454
	0	23.45	27	3	25910	4090	0.795887	1.22287
	0	23.4667	27	3	25973	4027	0.786645	1.2286
	0	23.4833	28	2	26025	3975	0.921458	1.1121
	0	23.5	28	2	26012	3988	0.922386	1.11039
	0	23.5167	29	1	26010	3990	0.986161	1.02447
	0	23.5333	29	1	26071	3929	0.985154	1.03078
	0	23.55	28	2	26089	3911	0.916739	1.11898
	0	23.5667	27	3	26127	3873	0.762692	1.26171
	0	23.5833	26	4	26167	3833	0.544977	1.44577
	0	23.6	26	4	26171	3829	0.544105	1.44764
	0	23.6167	27	3	26201	3799	0.75048	1.26932
	0	23.6333	27	3	26168	3832	0.755983	1.2685
	0	23.65	26	4	26167	3833	0.544977	1.44577
	0	23.6667	25	5	26156	3844	0.338453	1.73848
	0	23.6833	25	5	26149	3851	0.339907	1.73353
	0	23.7	25	5	26145	3855	0.340738	1.73353
	0	23.7167	24	6	26149	3851	0.17981	2.22446
	0	23.7333	25	5	26062	3938	0.358044	1.696
	0	23.75	26	4	26020	3980	0.576485	1.40919
	0	23.7667	24	6	26020	3980	0.20003	2.18666
	0	23.7833	24	6	26025	3975	0.199229	2.18666
	0	23.8	24	6	26030	3970	0.19843	2.19651
	0	23.8167	25	5	26027	3973	0.365367	1.67504
	0	23.8333	25	5	26032	3968	0.36432	1.67504
	0	23.85	24	6	26067	3933	0.192556	2.20765
	0	23.8667	25	5	26030	3970	0.364739	1.67504
	0	23.8833	25	5	26009	3991	0.369139	1.67081
	0	23.9	25	5	26016	3984	0.367672	1.67356
	0	23.9167	25	5	26003	3997	0.370396	1.67096
	0	23.9333	26	4	26034	3966	0.573531	1.40936
	0	23.95	26	4	25986	4014	0.583618	1.39832
	0	23.9667	25	5	25996	4004	0.371864	1.66942
	0	23.9833	27	3	26000	4000	0.782586	1.23188
	0	24	27	3	25902	4098	0.797038	1.22255
	0	24.0167	26	4	25886	4114	0.604238	1.38475
	0	24.0333	26	4	25839	4161	0.613738	1.38005
	0	24.05	27	3	25868	4132	0.801872	1.21923
	0	24.0667	28	2	25854	4146	0.932904	1.09315
	0	24.0833	29	1	25867	4133	0.98827	1.02447
	0	24.1	29	1	25848	4152	0.988525	1.02447
	0	24.1167	29	1	25839	4161	0.988644	1.02447
	0	24.1333	29	1	25821	4179	0.988879	1.02447
	0	24.15	28	2	25762	4238	0.938417	1.08803
	0	24.1667	28	2	25788	4212	0.936902	1.08803
	0	24.1833	28	2	25775	4225	0.937664	1.08803
	0	24.2	28	2	25825	4175	0.934688	1.09058
	0	24.2167	28	2	25842	4158	0.933648	1.09315
	0	24.2333	28	2	25870	4130	0.931901	1.09338
	0	24.25	27	3	25919	4081	0.794586	1.22398
	0	24.2667	27	3	25920	4080	0.794441	1.22398
	0	24.2833	25	5	26001	3999	0.370816	1.67096
	0	24.3	25	5	26068	3932	0.35679	1.69476
	0	24.3167	25	5	26110	3890	0.348024	1.72565
	0	24.3333	25	5	26155	3845	0.33866	1.73848
	0	24.35	23	7	26291	3709	0.0693055	3.8668
	0	24.3667	23	7	26293	3707	0.0691424	3.8668
	0	24.3833	23	7	26334	3666	0.0658521	3.8668
	0	24.4	24	6	26289	3711	0.158963	2.29285
	0	24.4167	23	7	26344	3656	0.065065	3.8668
	0	24.4333	25	5	26306	3694	0.307533	1.79581
	0	24.45	25	5	26386	3614	0.291278	1.8588
	0	24.4667	24	6	26336	3664	0.152235	2.29954
	0	24.4833	24	6	26348	3652	0.15054	2.3095
	0	24.5	24	6	26307	3693	0.15637	2.28833
	0	24.5167	23	7	26321	3679	0.0668844	3.8668
	0	24.5333	23	7	26330	3670	0.0661687	3.8668
	0	24.55	23	7	26287	3713	0.0696325	3.8668
	0	24.5667	23	7	26232	3768	0.0742261	2.93642
	0	24.5833	23	7	26116	3884	0.0845187	2.89778
	0	24.6	23	7	26078	3922	0.0880692	2.8846
	0	24.6167	24	6	26055	3945	0.194453	2.22232
	0	24.6333	25	5	26096	3904	0.350943	1.71381
	0	24.65	26	4	26083	3917	0.563111	1.4256
	0	24.6667	27	3	26129	3871	0.762368	1.26171
	0	24.6833	26	4	26134	3866	0.552141	1.44229
	0	24.7	25	5	26126	3874	0.344691	1.72776
	0	24.7167	26	4	26088	3912	0.562041	1.4259
	0	24.7333	25	5	26148	3852	0.340115	1.73353
	0	24.75	25	5	26055	3945	0.359507	1.69582
	0	24.7667	26	4	26076	3924	0.564607	1.42476
	0	24.7833	26	4	26043	3957	0.571626	1.41045
	0	24.8	26	4	26046	3954	0.57099	1.41074
	0	24.8167	26	4	25985	4015	0.583827	1.39832
	0	24.8333	25	5	25950	4050	0.381517	1.66279
	0	24.85	26	4	25966	4034	0.587786	1.39488
	0	24.8667	26	4	25921	4079	0.597083	1.39307
	0	24.8833	26	4	25866	4134	0.608296	1.38162
	0	24.9	26	4	25772	4228	0.627062	1.36477
	0	24.9167	26	4	25686	4314	0.643775	1.35609
	0	24.9333	24	6	25685	4315	0.256472	1.92756
	0	24.95	25	5	25617	4383	0.451374	1.59224
	0	24.9667	24	6	25598	4402	0.271919	1.89375
	0	24.9833	23	7	25621	4379	0.137621	2.34803
	0	25	23	7	25662	4338	0.132668	2.39489
	0	25.0167	23	7	25695	4305	0.128753	2.43929
	0	25.0333	23	7	25652	4348	0.133867	2.35084
	0	25.05	23	7	25675	4325	0.131118	2.38397
	0	25.0667	23	7	25685	4315	0.129933	2.43929
	0	25.0833	23	7	25698	4302	0.1284	2.43929
	0	25.1	23	7	25692	4308	0.129106	2.43929
	0	25.1167	24	6	25683	4317	0.256824	1.92756
	0	25.1333	24	6	25750	4250	0.245125	1.94372
	0	25.15	25	5	25747	4253	0.424169	1.63317
	0	25.1667	25	5	25751	4249	0.42333	1.63343
	0	25.1833	25	5	25740	4260	0.425638	1.63432
	0	25.2	24	6	25735	4265	0.247728	1.94752
	0	25.2167	25	5	25735	4265	0.426687	1.63432
	0	25.2333	26	4	25778	4222	0.625879	1.364
	0	25.25	26	4	25819	4181	0.617743	1.37397
	0	25.2667	26	4	25822	4178	0.617144	1.37397
	0	25.2833	26	4	25880	4120	0.605458	1.38303
	0	25.3	26	4	25863	4137	0.608903	1.38172
	0	25.3167	27	3	25864	4136	0.802435	1.21786
	0	25.3333	27	3	25899	4101	0.797468	1.22256
	0	25.35	27	3	25954	4046	0.789466	1.22715
	0	25.3667	28	2	25937	4063	0.927552	1.10669
	0	25.3833	27	3	25979	4021	0.785748	1.23087
	0	25.4	27	3	25924	4076	0.793861	1.22394
	0	25.4167	27	3	25942	4058	0.791233	1.22641
	0	25.4333	26	4	25930	4070	0.595233	1.3932
	0	25.45	26	4	25946	4054	0.591932	1.39187
	0	25.4667	27	3	25990	4010	0.784096	1.23163
	0	25.4833	28	2	25961	4039	0.925933	1.10669
	0	25.5	28	2	25901	4099	0.929919	1.09774
	0	25.5167	28	2	25898	4102	0.930113	1.09774
	0	25.5333	28	2	25883	4117	0.931076	1.09288
	0	25.55	28	2	25890	4110	0.930628	1.09774
	0	25.5667	28	2	25860	4140	0.93253	1.09315
	0	25.5833	27	3	25816	4184	0.80909	1.21656
	0	25.6	27	3	25831	4169	0.80703	1.21839
	0	25.6167	27	3	25844	4156	0.80523	1.21973
	0	25.6333	26	4	25854	4146	0.61072	1.38156
	0	25.65	26	4	25833	4167	0.614942	1.37989
	0	25.6667	26	4	25832	4168	0.615143	1.37989
	0	25.6833	25	5	25873	4127	0.397697	1.64754
	0	25.7	26	4	25897	4103	0.601997	1.38709
	0	25.7167	26	4	25894	4106	0.602609	1.38709
	0	25.7333	26	4	25932	4068	0.594821	1.3932
	0	25.75	26	4	26006	3994	0.57943	1.40025
	0	25.7667	26	4	26078	3922	0.56418	1.42476
	0	25.7833	26	4	26121	3879	0.554949	1.4348
	0	25.8	27	3	26135	3865	0.761394	1.26171
	0	25.8167	27	3	26216	3784	0.747948	1.27143
	0	25.8333	27	3	26280	3720	0.73693	1.27915
	0	25.85	26	4	26291	3709	0.517621	1.46082
	0	25.8667	28	2	26320	3680	0.89752	1.1381
	0	25.8833	27	3	26388	3612	0.717542	1.30061
	0	25.9	27	3	26428	3572	0.710106	1.30498
	0	25.9167	26	4	26467	3533	0.477759	1.53981
	0	25.9333	26	4	26477	3523	0.475463	1.53981
	0	25.95	27	3	26484	3516	0.699463	1.31278
	0	25.9667	27	3	26580	3420	0.680584	1.34353
	0	25.9833	27	3	26555	3445	0.685578	1.33588
	0	26	27	3	26527	3473	0.691106	1.3275
	0	26.0167	26	4	26477	3523	0.475463	1.53981
	0	26.0333	26	4	26514	3486	0.466941	1.55094
	0	26.05	26	4	26439	3561	0.484172	1.50449
	0	26.0667	26	4	26383	3617	0.496921	1.47762
	0	26.0833	26	4	26277	3723	0.520743	1.46116
	0	26.1	26	4	26239	3761	0.529173	1.45106
	0	26.1167	27	3	26169	3831	0.755817	1.2685
	0	26.1333	27	3	26112	3888	0.765111	1.26042
	0	26.15	27	3	26114	3886	0.76479	1.26042
	0	26.1667	27	3	26045	3955	0.775689	1.24051
	0	26.1833	26	4	26091	3909	0.561399	1.42628
	0	26.2	26	4	26096	3904	0.560327	1.42658
	0	26.2167	26	4	26073	3927	0.565248	1.42476
	0	26.2333	26	4	26106	3894	0.55818	1.42818
	0	26.25	26	4	26106	3894	0.55818	1.42818
	0	26.2667	25	5	26180	3820	0.333474	1.75392
	0	26.2833	25	5	26198	3802	0.329746	1.75588
	0	26.3	23	7	26244	3756	0.0732082	2.92833
	0	26.3167	24	6	26329	3671	0.153228	2.26938
	0	26.3333	24	6	26414	3586	0.141384	2.31355
	0	26.35	24	6	26450	3550	0.136511	2.35138
	0	26.3667	25	5	26478	3522	0.272839	1.88872
	0	26.3833	26	4	26523	3477	0.464862	1.55098
	0	26.4	27	3	26558	3442	0.684981	1.33588
	0	26.4167	28	2	26534	3466	0.876289	1.16193
	0	26.4333	28	2	26518	3482	0.878001	1.16193
	0	26.45	28	2	26471	3529	0.88291	1.15069
	0	26.4667	28	2	26446	3554	0.885449	1.14943
	0	26.4833	28	2	26432	3568	0.88685	1.14844
	0	26.5	28	2	26388	3612	0.891154	1.14683
	0	26.5167	28	2	26407	3593	0.889314	1.14807
	0	26.5333	28	2	26390	3610	0.890961	1.14683
	0	26.55	28	2	26385	3615	0.891442	1.14683
	0	26.5667	28	2	26388	3612	0.891154	1.14683
	0	26.5833	28	2	26337	3663	0.89596	1.14007
	0	26.6	27	3	26291	3709	0.735002	1.28044
	0	26.6167	26	4	26303	3697	0.51494	1.46313
	0	26.6333	26	4	26295	3705	0.516728	1.46371
	0	26.65	26	4	26256	3744	0.525409	1.45813
	0	26.6667	25	5	26212	3788	0.326852	1.75527
	0	26.6833	26	4	26162	3838	0.546065	1.44619
	0	26.7	25	5	26180	3820	0.333474	1.75392
	0	26.7167	25	5	26178	3822	0.333888	1.75392
	0	26.7333	25	5	26191	3809	0.331195	1.75392
	0	26.75	25	5	26188	3812	0.331816	1.75392
	0	26.7667	25	5	26122	3878	0.345524	1.72776
	0	26.7833	25	5	26137	3863	0.342402	1.72398
	0	26.8	25	5	26108	3892	0.348441	1.72565
	0	26.8167	26	4	26140	3860	0.550842	1.44325
	0	26.8333	26	4	26136	3864	0.551708	1.44229
	0	26.85	27	3	26115	3885	0.764629	1.26042
	0	26.8667	27	3	26064	3936	0.772727	1.25336
	0	26.8833	28	2	26013	3987	0.922315	1.11039
	0	26.9	28	2	25950	4050	0.926679	1.10669
	0	26.9167	27	3	25938	4062	0.791819	1.22641
	0	26.9333	27	3	25946	4054	0.790645	1.22633
	0	26.95	27	3	25877	4123	0.800601	1.22183
	0	26.9667	27	3	25867	4133	0.802013	1.21923
	0	26.9833	27	3	25831	4169	0.80703	1.21839
	0	27	27	3	25756	4244	0.817158	1.20762
	0	27.0167	27	3	25767	4233	0.815699	1.21074
	0	27.0333	27	3	25715	4285	0.822512	1.20728
	0	27.05	27	3	25603	4397	0.836501	1.20504
	0	27.0667	27	3	25565	4435	0.841039	1.20457
	0	27.0833	27	3	25569	4431	0.840566	1.20457
	0	27.1	24	6	25547	4453	0.281101	1.8772
	0	27.1167	24	6	25552	4448	0.280197	1.8772
	0	27.1333	25	5	25565	4435	0.4622	1.55707
	0	27.15	25	5	25536	4464	0.468219	1.54732
	0	27.1667	25	5	25451	4549	0.485774	1.49725
	0	27.1833	25	5	25475	4525	0.480831	1.51443
	0	27.2	24	6	25443	4557	0.300084	1.85315
	0	27.2167	24	6	25401	4599	0.30784	1.79581
	0	27.2333	25	5	25329	4671	0.510696	1.46649
	0	27.25	24	6	25254	4746	0.335329	1.73486
	0	27.2667	24	6	25278	4722	0.330808	1.75392
	0	27.2833	24	6	25270	4730	0.332314	1.75392
	0	27.3	22	8	25293	4707	0.0865381	2.8846
	0	27.3167	22	8	25280	4720	0.0876551	2.8846
	0	27.3333	23	7	25271	4729	0.18371	2.20238
	0	27.35	25	5	25279	4721	0.5208	1.46116
	0	27.3667	26	4	25261	4739	0.719596	1.29424
	0	27.3833	26	4	25227	4773	0.725159	1.2908
	0	27.4	26	4	25231	4769	0.724509	1.29184
	0	27.4167	26	4	25225	4775	0.725484	1.2908
	0	27.4333	26	4	25217	4783	0.726781	1.28799
	0	27.45	25	5	25275	4725	0.521606	1.45904
	0	27.4667	25	5	25270	4730	0.522612	1.45845
	0	27.4833	24	6	25269	4731	0.332502	1.75392
	0	27.5	24	6	25266	4734	0.333067	1.75392
	0	27.5167	24	6	25239	4761	0.33816	1.73848
	0	27.5333	23	7	25229	4771	0.189675	2.20077
	0	27.55	22	8	25234	4766	0.0916792	2.70529
	0	27.5667	22	8	25264	4736	0.0890421	2.76338
	0	27.5833	22	8	25316	4684	0.0845837	2.89778
	0	27.6	22	8	25332	4668	0.0832406	2.9551
	0	27.6167	24	6	25332	4668	0.320681	1.76978
	0	27.6333	24	6	25376	4624	0.312479	1.76905
	0	27.65	24	6	25425	4575	0.303402	1.83915
	0	27.6667	27	3	25511	4489	0.84731	1.1976
	0	27.6833	27	3	25592	4408	0.837825	1.20468
	0	27.7	27	3	25633	4367	0.832844	1.20789
	0	27.7167	27	3	25692	4308	0.825461	1.206
	0	27.7333	28	2	25732	4268	0.940123	1.08337
	0	27.75	28	2	25769	4231	0.938012	1.08803
	0	27.7667	28	2	25808	4192	0.935714	1.09058
	0	27.7833	29	1	25917	4083	0.98757	1.02447
	0	27.8	28	2	25967	4033	0.925524	1.10669
	0	27.8167	28	2	25947	4053	0.926881	1.10669
	0	27.8333	27	3	25986	4014	0.784698	1.23087
	0	27.85	27	3	26072	3928	0.771471	1.25336
	0	27.8667	27	3	26084	3916	0.769577	1.25523
	0	27.8833	27	3	26176	3824	0.754657	1.27042
	0	27.9	26	4	26243	3757	0.528289	1.45279
	0	27.9167	26	4	26280	3720	0.520074	1.46157
	0	27.9333	27	3	26320	3680	0.729867	1.28234
	0	27.95	28	2	26331	3669	0.896513	1.13923
	0	27.9667	28	2	26354	3646	0.894379	1.1414
	0	27.9833	28	2	26409	3591	0.889118	1.14807
	0	28	28	2	26508	3492	0.87906	1.15497
	0	28.0167	28	2	26523	3477	0.877468	1.16193
	0	28.0333	28	2	26610	3390	0.867865	1.1757
	0	28.05	28	2	26624	3376	0.866259	1.17863
	0	28.0667	28	2	26666	3334	0.86134	1.18307
	0	28.0833	29	1	26687	3313	0.970098	1.05914
	0	28.1	28	2	26765	3235	0.849114	1.19656
	0	28.1167	28	2	26799	3201	0.844705	1.19675
	0	28.1333	28	2	26821	3179	0.841792	1.20094
	0	28.15	28	2	26870	3130	0.835136	1.20743
	0	28.1667	28	2	26866	3134	0.835688	1.20743
	0	28.1833	28	2	26811	3189	0.843122	1.19796
	0	28.2	27	3	26820	3180	0.629918	1.36219
	0	28.2167	26	4	26788	3212	0.402872	1.64624
	0	28.2333	26	4	26780	3220	0.404759	1.64541
	0	28.25	26	4	26754	3246	0.410888	1.64025
	0	28.2667	27	3	26709	3291	0.653963	1.35826
	0	28.2833	27	3	26686	3314	0.658814	1.35838
	0	28.3	28	2	26688	3312	0.8587	1.18645
	0	28.3167	29	1	26644	3356	0.971509	1.05914
	0	28.3333	29	1	26551	3449	0.974345	1.05169
	0	28.35	29	1	26504	3496	0.975672	1.05169
	0	28.3667	29	1	26433	3567	0.977552	1.04094
	0	28.3833	29	1	26384	3616	0.978767	1.04094
	0	28.4	29	1	26255	3745	0.981669	1.03385
	0	28.4167	29	1	26246	3754	0.981856	1.03385
	0	28.4333	29	1	26215	3785	0.982488	1.03308
	0	28.45	28	2	26190	3810	0.908774	1.12534
	0	28.4667	27	3	26113	3887	0.76495	1.26042
	0	28.4833	27	3	26117	3883	0.764307	1.26042
	0	28.5	27	3	26073	3927	0.771314	1.25336
	0	28.5167	27	3	26051	3949	0.774757	1.24293
	0	28.5333	25	5	26029	3971	0.364948	1.67504
	0	28.55	25	5	25987	4013	0.373752	1.66942
	0	28.5667	25	5	26016	3984	0.367672	1.67356
	0	28.5833	25	5	26036	3964	0.363483	1.68696
	0	28.6	25	5	26018	3982	0.367253	1.67356
	0	28.6167	25	5	25990	4010	0.373122	1.66942
	0	28.6333	27	3	25983	4017	0.785149	1.23087
	0	28.65	27	3	25940	4060	0.791526	1.22641
	0	28.6667	27	3	25909	4091	0.796031	1.22287
	0	28.6833	27	3	25899	4101	0.797468	1.22256
	0	28.7	27	3	25870	4130	0.80159	1.21923
	0	28.7167	26	4	25822	4178	0.617144	1.37397
	0	28.7333	26	4	25803	4197	0.62093	1.36784
	0	28.75	26	4	25770	4230	0.627455	1.36403
	0	28.7667	27	3	25753	4247	0.817554	1.20762
	0	28.7833	27	3	25739	4261	0.819393	1.20647
	0	28.8	27	3	25767	4233	0.815699	1.21074
	0	28.8167	25	5	25720	4280	0.429832	1.62566
	0	28.8333	25	5	25686	4314	0.436955	1.61271
	0	28.85	26	4	25657	4343	0.64931	1.3543
	0	28.8667	25	5	25638	4362	0.446992	1.59658
	0	28.8833	25	5	25600	4400	0.454917	1.57921
	0	28.9	24	6	25591	4409	0.273174	1.88872
	0	28.9167	24	6	25550	4450	0.280558	1.8772
	0	28.9333	24	6	25526	4474	0.284907	1.85703
	0	28.95	22	8	25526	4474	0.0680213	3.8668
	0	28.9667	22	8	25566	4434	0.065126	3.8668
	0	28.9833	22	8	25541	4459	0.0669259	3.8668
	0	29	22	8	25595	4405	0.0630781	3.8668
	0	29.0167	21	9	25624	4376	0.0236325	6.54439
	0	29.0333	22	8	25643	4357	0.0597824	3.98549
	0	29.05	25	5	25640	4360	0.446574	1.59658
	0	29.0667	25	5	25658	4342	0.442813	1.60622
	0	29.0833	26	4	25692	4308	0.642623	1.35922
	0	29.1	25	5	25708	4292	0.432347	1.62154
	0	29.1167	24	6	25726	4274	0.249294	1.93942
	0	29.1333	24	6	25777	4223	0.240463	1.94532
	0	29.15	24	6	25727	4273	0.24912	1.93942
	0	29.1667	24	6	25725	4275	0.249469	1.93942
	0	29.1833	25	5	25765	4235	0.420391	1.63625
	0	29.2	24	6	25797	4203	0.23703	1.98285
	0	29.2167	25	5	25773	4227	0.418712	1.64549
	0	29.2333	26	4	25719	4281	0.637414	1.36179
	0	29.25	27	3	25674	4326	0.827741	1.20594
	0	29.2667	25	5	25688	4312	0.436537	1.61271
	0	29.2833	25	5	25628	4372	0.449079	1.59398
	0	29.3	25	5	25546	4454	0.466145	1.55094
	0	29.3167	25	5	25556	4444	0.464069	1.55495
	0	29.3333	25	5	25528	4472	0.469877	1.54763
	0	29.35	25	5	25470	4530	0.481862	1.51443
	0	29.3667	25	5	25451	4549	0.485774	1.49725
	0	29.3833	25	5	25449	4551	0.486185	1.49725
	0	29.4	25	5	25465	4535	0.482892	1.50863
	0	29.4167	27	3	25471	4529	0.851824	1.19322
	0	29.4333	27	3	25400	4600	0.859566	1.18244
	0	29.45	27	3	25338	4662	0.86605	1.17863
	0	29.4667	27	3	25322	4678	0.867682	1.1757
	0	29.4833	27	3	25272	4728	0.872677	1.16884
	0	29.5	27	3	25217	4783	0.877988	1.16193
	0	29.5167	27	3	25213	4787	0.878367	1.16193
	0	29.5333	26	4	25177	4823	0.733204	1.28043
	0	29.55	27	3	25226	4774	0.877132	1.16193
	0	29.5667	27	3	25182	4818	0.88127	1.15155
	0	29.5833	26	4	25168	4832	0.734634	1.28044
	0	29.6	25	5	25153	4847	0.545936	1.44619
	0	29.6167	23	7	25109	4891	0.207192	2.10507
	0	29.6333	23	7	25085	4915	0.210777	2.09612
	0	29.65	24	6	24974	5026	0.388724	1.65219
	0	29.6667	23	7	24924	5076	0.235481	1.98285
	0	29.6833	23	7	24881	5119	0.242262	1.9381
	0	29.7	24	6	24872	5128	0.408354	1.63927
	0	29.7167	25	5	24931	5069	0.588896	1.39488
	0	29.7333	25	5	25014	4986	0.573049	1.41062
	0	29.75	25	5	25014	4986	0.573049	1.41062
	0	29.7667	26	4	25029	4971	0.756057	1.2685
	0	29.7833	26	4	25140	4860	0.739051	1.27913
	0	29.8	27	3	25231	4769	0.876654	1.16193
	0	29.8167	26	4	25300	4700	0.713122	1.30411
	0	29.8333	27	3	25370	4630	0.862735	1.18324
	0	29.85	28	2	25439	4561	0.954663	1.0776
	0	29.8667	28	2	25475	4525	0.95307	1.08266
	0	29.8833	28	2	25543	4457	0.94992	1.08356
	0	29.9	28	2	25513	4487	0.951332	1.08295
	0	29.9167	28	2	25598	4402	0.947232	1.08324
	0	29.9333	27	3	25557	4443	0.841981	1.20094
	0	29.95	28	2	25562	4438	0.949006	1.08389
	0	29.9667	28	2	25516	4484	0.951193	1.08295
	0	29.9833	28	2	25534	4466	0.950347	1.08356
	0	30	27	3	25451	4549	0.854039	1.19138
	0	30.0167	26	4	25462	4538	0.685172	1.33588
	0	30.0333	26	4	25381	4619	0.699359	1.31278
	0	30.05	24	6	25320	4680	0.322926	1.76722
	0	30.0667	24	6	25306	4694	0.325549	1.75933
	0	30.0833	24	6	25275	4725	0.331373	1.75392
	0	30.1	25	5	25278	4722	0.521002	1.46116
	0	30.1167	24	6	25274	4726	0.331561	1.75392
	0	30.1333	23	7	25160	4840	0.199664	2.18666
	0	30.15	23	7	25179	4821	0.19689	2.21703
	0	30.1667	24	6	25172	4828	0.350854	1.71381
	0	30.1833	25	5	25104	4896	0.555572	1.43271
	0	30.2	26	4	25113	4887	0.743262	1.27538
	0	30.2167	26	4	25071	4929	0.749717	1.26997
	0	30.2333	26	4	25095	4905	0.746043	1.27358
	0	30.25	25	5	25070	4930	0.562209	1.4259
	0	30.2667	25	5	25098	4902	0.556746	1.43271
	0	30.2833	25	5	25128	4872	0.550863	1.44325
	0	30.3	25	5	25137	4863	0.549091	1.44446
	0	30.3167	25	5	25123	4877	0.551845	1.44229
	0	30.3333	24	6	25123	4877	0.360183	1.69277
	0	30.35	24	6	25131	4869	0.358658	1.69667
	0	30.3667	22	8	25206	4794	0.0941834	2.67627
	0	30.3833	22	8	25209	4791	0.0939131	2.67627
	0	30.4	23	7	25234	4766	0.188961	2.20077
	0	30.4167	22	8	25274	4726	0.0881736	2.8846
	0	30.4333	23	7	25257	4743	0.185689	2.19895
	0	30.45	25	5	25242	4758	0.528232	1.45279
	0	30.4667	25	5	25279	4721	0.5208	1.46116
	0	30.4833	25	5	25370	4630	0.502361	1.4751
	0	30.5	25	5	25426	4574	0.490909	1.49202
	0	30.5167	25	5	25502	4498	0.475257	1.53981
	0	30.5333	25	5	25528	4472	0.469877	1.54763
	0	30.55	25	5	25569	4431	0.461368	1.561
	0	30.5667	23	7	25583	4417	0.142297	2.27676
	0	30.5833	23	7	25609	4391	0.139089	2.34803
	0	30.6	24	6	25627	4373	0.266739	1.894
	0	30.6167	24	6	25616	4384	0.2687	1.8893
	0	30.6333	23	7	25590	4410	0.14143	2.31355
	0	30.65	22	8	25563	4437	0.0653403	3.8668
	0	30.6667	22	8	25520	4480	0.0684627	3.8668
	0	30.6833	23	7	25551	4449	0.146299	2.29404
	0	30.7	22	8	25538	4462	0.0671441	3.8668
	0	30.7167	22	8	25537	4463	0.0672169	3.8668
	0	30.7333	22	8	25513	4487	0.06898	3.8668
	0	30.75	22	8	25580	4420	0.064132	3.8668
	0	30.7667	24	6	25553	4447	0.280016	1.8772
	0	30.7833	21	9	25537	4463	0.0265551	6.82845
	0	30.8	23	7	25589	4411	0.141553	2.31355
	0	30.8167	23	7	25605	4395	0.13958	2.34803
	0	30.8333	23	7	25610	4390	0.138966	2.34803
	0	30.85	25	5	25621	4379	0.45054	1.59224
	0	30.8667	25	5	25687	4313	0.436746	1.61271
	0	30.8833	25	5	25689	4311	0.436327	1.61271
	0	30.9	26	4	25627	4373	0.654982	1.35748
	0	30.9167	24	6	25622	4378	0.26763	1.88915
	0	30.9333	25	5	25589	4411	0.457208	1.57493
	0	30.95	25	5	25596	4404	0.455751	1.57608
	0	30.9667	25	5	25611	4389	0.452625	1.58409
	0	30.9833	26	4	25606	4394	0.658919	1.35838
	0	31	26	4	25627	4373	0.654982	1.35748
	0	31.0167	26	4	25626	4374	0.65517	1.35748
	0	31.0333	27	3	25549	4451	0.842918	1.19796
	0	31.05	27	3	25436	4564	0.855683	1.19138
	0	31.0667	27	3	25440	4560	0.855246	1.19138
	0	31.0833	26	4	25453	4547	0.686769	1.33315
	0	31.1	26	4	25433	4567	0.6903	1.3275
	0	31.1167	26	4	25382	4618	0.699186	1.31278
	0	31.1333	26	4	25416	4584	0.693281	1.32175
	0	31.15	26	4	25472	4528	0.683391	1.33925
	0	31.1667	26	4	25361	4639	0.702797	1.3106
	0	31.1833	26	4	25352	4648	0.704335	1.30848
	0	31.2	27	3	25356	4644	0.864193	1.18116
	0	31.2167	27	3	25373	4627	0.862421	1.18324
	0	31.2333	27	3	25320	4680	0.867885	1.1757
	0	31.25	28	2	25335	4665	0.95899	1.07481
	0	31.2667	27	3	25354	4646	0.864401	1.18116
	0	31.2833	27	3	25407	4593	0.858818	1.18645
	0	31.3	27	3	25412	4588	0.858281	1.18645
	0	31.3167	27	3	25404	4596	0.859139	1.18645
	0	31.3333	27	3	25451	4549	0.854039	1.19138
	0	31.35	26	4	25482	4518	0.681604	1.34162
	0	31.3667	27	3	25496	4504	0.849016	1.19656
	0	31.3833	28	2	25460	4540	0.953739	1.07945
	0	31.4	28	2	25559	4441	0.949151	1.08389
	0	31.4167	29	1	25608	4392	0.991325	1.01314
	0	31.4333	29	1	25656	4344	0.990824	1.01393
	0	31.45	28	2	25663	4337	0.943886	1.08314
	0	31.4667	28	2	25633	4367	0.945453	1.08261
	0	31.4833	28	2	25633	4367	0.945453	1.08261
	0	31.5	26	4	25576	4424	0.664496	1.35267
	0	31.5167	26	4	25602	4398	0.659666	1.35526
	0	31.5333	26	4	25605	4395	0.659106	1.35838
	0	31.55	27	3	25573	4427	0.840092	1.20457
	0	31.5667	26	4	25576	4424	0.664496	1.35267
	0	31.5833	26	4	25522	4478	0.674393	1.34588
	0	31.6	25	5	25576	4424	0.459913	1.57204
	0	31.6167	26	4	25591	4409	0.661715	1.35417
	0	31.6333	25	5	25574	4426	0.460329	1.57204
	0	31.65	26	4	25552	4448	0.668917	1.34832
	0	31.6667	26	4	25523	4477	0.674211	1.34588
	0	31.6833	25	5	25507	4493	0.474224	1.5449
	0	31.7	26	4	25548	4452	0.66965	1.34832
	0	31.7167	25	5	25505	4495	0.474637	1.5449
	0	31.7333	24	6	25525	4475	0.285088	1.85703
	0	31.75	25	5	25509	4491	0.47381	1.5449
	0	31.7667	26	4	25522	4478	0.674393	1.34588
	0	31.7833	25	5	25498	4502	0.476084	1.53981
	0	31.8	25	5	25464	4536	0.483098	1.50863
	0	31.8167	27	3	25434	4566	0.855901	1.19138
	0	31.8333	26	4	25422	4578	0.692231	1.32175
	0	31.85	27	3	25459	4541	0.853157	1.19168
	0	31.8667	27	3	25470	4530	0.851935	1.19322
	0	31.8833	27	3	25441	4559	0.855137	1.19138
	0	31.9	27	3	25408	4592	0.85871	1.18645
	0	31.9167	27	3	25376	4624	0.862106	1.18324
	0	31.9333	27	3	25354	4646	0.864401	1.18116
	0	31.95	28	2	25397	4603	0.956459	1.07747
	0	31.9667	29	1	25366	4634	0.993474	1.01381
	0	31.9833	29	1	25304	4696	0.993936	1.01381
	0	32	30	0	25381	4619	1	1.0158
	0	32.0167	30	0	25463	4537	1	1.0158
	0	32.0333	28	2	25456	4544	0.953917	1.07945
	0	32.05	29	1	25420	4580	0.993044	1.01381
	0	32.0667	29	1	25451	4549	0.992786	1.01381
	0	32.0833	28	2	25441	4559	0.954575	1.0776
	0	32.1	28	2	25405	4595	0.956122	1.07747
	0	32.1167	27	3	25453	4547	0.853819	1.19138
	0	32.1333	27	3	25431	4569	0.856228	1.19138
	0	32.15	27	3	25408	4592	0.85871	1.18645
	0	32.1667	26	4	25414	4586	0.69363	1.32175
	0	32.1833	25	5	25440	4560	0.488035	1.49401
	0	32.2	25	5	25413	4587	0.493574	1.4855
	0	32.2167	26	4	25433	4567	0.6903	1.3275
	0	32.2333	26	4	25470	4530	0.683748	1.33925
	0	32.25	26	4	25406	4594	0.695025	1.31831
	0	32.2667	27	3	25438	4562	0.855465	1.19138
	0	32.2833	25	5	25421	4579	0.491934	1.48705
	0	32.3	26	4	25454	4546	0.686592	1.33315
	0	32.3167	25	5	25428	4572	0.490499	1.49202
	0	32.3333	25	5	25498	4502	0.476084	1.53981
	0	32.35	25	5	25559	4441	0.463446	1.55495
	0	32.3667	25	5	25599	4401	0.455126	1.57921
	0	32.3833	25	5	25634	4366	0.447827	1.5949
	0	32.4	24	6	25613	4387	0.269236	1.88937
	0	32.4167	25	5	25631	4369	0.448453	1.59371
	0	32.4333	24	6	25580	4420	0.275149	1.87958
	0	32.45	24	6	25534	4466	0.283455	1.85872
	0	32.4667	23	7	25504	4496	0.152282	2.29954
	0	32.4833	23	7	25517	4483	0.150615	2.3095
	0	32.5	23	7	25506	4494	0.152025	2.29954
	0	32.5167	23	7	25452	4548	0.159044	2.29285
	0	32.5333	24	6	25443	4557	0.300084	1.85315
	0	32.55	25	5	25397	4603	0.496849	1.47762
	0	32.5667	25	5	25491	4509	0.47753	1.53981
	0	32.5833	26	4	25489	4511	0.68035	1.34353
	0	32.6	26	4	25536	4464	0.671844	1.3467
	0	32.6167	26	4	25573	4427	0.665051	1.35112
	0	32.6333	26	4	25583	4417	0.6632	1.3527
	0	32.65	27	3	25633	4367	0.832844	1.20789
	0	32.6667	27	3	25630	4370	0.833213	1.20704
	0	32.6833	26	4	25710	4290	0.639155	1.36198
	0	32.7	27	3	25745	4255	0.818607	1.20657
	0	32.7167	27	3	25797	4203	0.811675	1.21432
	0	32.7333	28	2	25786	4214	0.93702	1.08803
	0	32.75	29	1	25782	4218	0.989372	1.0147
	0	32.7667	29	1	25785	4215	0.989335	1.0147
	0	32.7833	29	1	25814	4186	0.988969	1.02447
	0	32.8	29	1	25841	4159	0.988618	1.02447
	0	32.8167	28	2	25833	4167	0.934201	1.09315
	0	32.8333	28	2	25918	4082	0.92881	1.09774
	0	32.85	28	2	25892	4108	0.9305	1.09774
	0	32.8667	28	2	25912	4088	0.929203	1.09774
	0	32.8833	28	2	25865	4135	0.932216	1.09315
	0	32.9	29	1	25863	4137	0.988324	1.02447
	0	32.9167	29	1	25891	4109	0.987939	1.02447
	0	32.9333	29	1	25895	4105	0.987883	1.02447
	0	32.95	27	3	25916	4084	0.79502	1.22398
	0	32.9667	27	3	25964	4036	0.787985	1.22856
	0	32.9833	27	3	25937	4063	0.791965	1.22641
	0	33	28	2	26022	3978	0.921673	1.1121
	0	33.0167	29	1	26072	3928	0.985137	1.03078
[truncated: 84,420 more rows]
