# Supplementary material for: Accept–reject decision-making revealed via a quantitative and ethological study of C. elegans foraging
Source: eLife. 2025 Sep 10;13:RP103191. doi: 10.7554/eLife.103191 (PMC12422737; doi:10.7554/eLife.103191)
Supplement: Figure 2—source data 6. [file elife-103191-fig2-data6.xlsx]

## Sheet: Sheet1
Figure 2 - Source Data 6
Figure 2G - Duration of patch encounters
Summary Statistics
	label	OD600	growth time (hr)	# worms	# encounters	saturation		* saturation gives the grayscale color value from 0 (black) to 1 (white) for each condition
	0	0	1	30	743	0.8
	0.2	0.05	1	23	505	0.73375
	0.3	0.1	1	25	686	0.713375
	0.5	0.5	1	35	743	0.664843
	1	1	1	46	876	0.589005
	2	2	1	44	626	0.527447
	3	3	1	48	655	0.503663
	5	4	1	44	594	0.454288
	6	5	1	50	598	0.440592
	10	10	1	50	419	0.392767
	50	1	12	20	69	0.241847
	200	1	48	28	46	0.117375
Kernel Density Estimate
	duration (min)	log10(duration)	0	0.2	0.3	0.5	1	2	3	5	6	10	50	200		* kernel density estimates (KDE) of distributions of duration of patch encounter
	0.01	-2	5.52805e-07	1.46705e-08	1.58878e-05	2.66063e-07	2.11803e-06	8.80025e-06	2.57855e-05	2.30229e-08	4.3093e-08	1.56821e-05	1.2796e-05	8.4266e-10		* KDEs are reported in lieu of histograms for visibility purposes only
	0.0102329	-1.99	6.78419e-07	1.88144e-08	1.86899e-05	3.29371e-07	2.57847e-06	1.05199e-05	3.04731e-05	2.93434e-08	5.45629e-08	1.87399e-05	1.55605e-05	1.13403e-09
	0.0104713	-1.98	8.30498e-07	2.40686e-08	2.1933e-05	4.06724e-07	3.13128e-06	1.25456e-05	3.59259e-05	3.73057e-08	6.89131e-08	2.23397e-05	1.88753e-05	1.52235e-09
	0.0107152	-1.97	1.08399e-06	3.07132e-08	2.84159e-05	5.0099e-07	3.79325e-06	1.49257e-05	4.2252e-05	4.73101e-08	8.68202e-08	2.65661e-05	2.28394e-05	2.03856e-09
	0.0109648	-1.96	1.32307e-06	3.90942e-08	3.33288e-05	6.15564e-07	4.58387e-06	1.7715e-05	4.95722e-05	5.98476e-08	1.09107e-07	3.15156e-05	2.75676e-05	2.72302e-09
	0.0112202	-1.95	1.61094e-06	4.96381e-08	3.90031e-05	7.54451e-07	5.52564e-06	2.09756e-05	5.80202e-05	7.55186e-08	1.36773e-07	3.72964e-05	3.31923e-05	3.62825e-09
	0.0114815	-1.94	1.95667e-06	6.28683e-08	4.56903e-05	1.40127e-06	6.64452e-06	2.50789e-05	6.77443e-05	9.50551e-08	1.71026e-07	4.41654e-05	3.98656e-05	4.82238e-09
	0.011749	-1.93	2.37081e-06	7.9426e-08	5.32426e-05	1.71358e-06	7.97033e-06	2.9572e-05	7.89074e-05	1.19347e-07	2.13323e-07	5.20241e-05	4.77623e-05	6.3936e-09
	0.0120226	-1.92	2.86562e-06	1.00094e-07	6.19062e-05	2.0903e-06	9.5372e-06	3.47885e-05	9.16886e-05	1.49472e-07	2.65417e-07	6.11335e-05	5.70817e-05	8.45569e-09
	0.0123027	-1.91	3.4553e-06	1.25825e-07	7.18212e-05	2.54351e-06	1.13841e-05	4.08295e-05	0.000106284	1.86735e-07	3.29407e-07	7.16652e-05	6.80509e-05	1.11551e-08
	0.0125893	-1.9	4.15619e-06	1.57776e-07	8.31419e-05	3.27338e-06	1.37131e-05	4.78075e-05	0.000122905	2.32704e-07	4.07804e-07	8.38094e-05	8.09278e-05	1.46796e-08
	0.0128825	-1.89	4.98714e-06	1.97346e-07	9.60372e-05	3.96936e-06	1.62971e-05	5.58476e-05	0.000141785	2.89266e-07	5.03599e-07	9.77761e-05	9.60039e-05	1.92698e-08
	0.0131826	-1.88	5.96971e-06	2.46225e-07	0.000110692	4.80154e-06	1.93209e-05	6.5088e-05	0.000163172	3.58677e-07	6.20343e-07	0.000113797	0.000113608	2.52324e-08
	0.0134896	-1.87	7.12855e-06	3.06442e-07	0.000127307	5.794e-06	2.28503e-05	7.64091e-05	0.000187333	4.43634e-07	7.62243e-07	0.000132126	0.000134108	3.2958e-08
	0.0138038	-1.86	8.49174e-06	3.80433e-07	0.000146102	6.9745e-06	2.69588e-05	8.86863e-05	0.000214556	5.47345e-07	9.34263e-07	0.00015304	0.000157919	4.29423e-08
	0.0141254	-1.85	1.06297e-05	4.71112e-07	0.000167896	8.37502e-06	3.17289e-05	0.000103081	0.0002468	6.73613e-07	4.0954e-06	0.00017684	0.000185499	5.58122e-08
	0.0144544	-1.84	1.2624e-05	5.81947e-07	0.000191912	1.00322e-05	3.72528e-05	0.000119128	0.000281448	8.26942e-07	4.99999e-06	0.000203855	0.000217362	7.23594e-08
	0.0147911	-1.83	1.4957e-05	7.17062e-07	0.000218901	1.1988e-05	4.36325e-05	0.000137362	0.000320202	1.01264e-06	6.08919e-06	0.000234437	0.000254072	9.35798e-08
	0.0151356	-1.82	1.92676e-05	8.81342e-07	0.000250634	1.48893e-05	5.14895e-05	0.00015803	0.000364115	1.69684e-06	9.37032e-06	0.000269618	0.000296254	1.20723e-07
	0.0154882	-1.81	2.2788e-05	1.08055e-06	0.000284819	1.77274e-05	6.00472e-05	0.000181399	0.000412368	2.07432e-06	1.13736e-05	0.00030865	0.000344593	1.55354e-07
	0.0158489	-1.8	2.68905e-05	1.32149e-06	0.000323009	2.10557e-05	6.98601e-05	0.000207758	0.000465926	2.52952e-06	1.37708e-05	0.000352501	0.00039984	1.99423e-07
	0.0162181	-1.79	3.78231e-05	3.86039e-06	0.000365578	2.78251e-05	8.2593e-05	0.000242131	0.00052599	3.07699e-06	1.74824e-05	0.000401634	0.000462811	2.55359e-07
	0.0165959	-1.78	4.4696e-05	4.7065e-06	0.000412927	3.29958e-05	9.57266e-05	0.000276448	0.000591621	3.73371e-06	2.10787e-05	0.000456541	0.000534392	3.26175e-07
	0.0169824	-1.77	5.5405e-05	5.72384e-06	0.000467293	4.1736e-05	0.000112112	0.00031573	0.000664386	9.1755e-06	2.74349e-05	0.000522113	0.000615542	4.15598e-07
	0.017378	-1.76	6.53123e-05	6.94384e-06	0.000525893	4.93684e-05	0.000129432	0.000359012	0.000743905	1.11333e-05	3.29589e-05	0.000591105	0.000707291	5.28226e-07
	0.0177828	-1.75	8.23577e-05	1.22176e-05	0.000595619	6.18356e-05	0.000149629	0.000409031	0.00083104	1.54965e-05	4.39342e-05	0.000667686	0.000810743	6.69716e-07
	0.018197	-1.74	9.69358e-05	1.47982e-05	0.000668206	7.29646e-05	0.000172003	0.00046331	0.000926273	1.87385e-05	5.263e-05	0.000752474	0.000927073	8.47005e-07
	0.0186209	-1.73	0.00011832	2.02189e-05	0.000752038	8.74972e-05	0.000201866	0.000523719	0.00103081	2.45922e-05	6.36837e-05	0.00084893	0.00105753	1.06858e-06
	0.0190546	-1.72	0.000138921	2.44071e-05	0.000840965	0.000102866	0.000231359	0.000590803	0.00114383	2.9628e-05	7.59465e-05	0.0009527	0.00120344	1.34478e-06
	0.0194984	-1.71	0.000165337	3.31366e-05	0.000945612	0.00012607	0.000269174	0.000667029	0.00127147	4.11717e-05	9.46973e-05	0.00106925	0.00136617	1.6882e-06
	0.0199526	-1.7	0.000193498	3.98778e-05	0.00105442	0.000147838	0.00030755	0.000749638	0.0014052	4.9478e-05	0.000112534	0.00119491	0.00154719	2.11409e-06
	0.0204174	-1.69	0.000237288	5.02701e-05	0.00117867	0.000179449	0.000358606	0.000842758	0.00155124	6.25603e-05	0.000134238	0.00133245	0.00174798	2.64088e-06
	0.020893	-1.68	0.000277236	6.02604e-05	0.00131045	0.000209882	0.000408719	0.00094363	0.0017072	7.48991e-05	0.000158801	0.00148261	0.00197012	3.2908e-06
	0.0213796	-1.67	0.000331949	7.60097e-05	0.00146401	0.000253621	0.000468913	0.00105539	0.00187488	9.7786e-05	0.000191981	0.00164741	0.00221519	4.09056e-06
	0.0218776	-1.66	0.000386862	9.07828e-05	0.0016236	0.000295891	0.000532759	0.00117732	0.00205471	0.000116742	0.000226229	0.00182543	0.00248482	5.07215e-06
	0.0223872	-1.65	0.000463247	0.000115373	0.00180436	0.000354616	0.000612764	0.00131424	0.00224914	0.000147769	0.000273339	0.00202124	0.00278067	6.27381e-06
	0.0229087	-1.64	0.000546537	0.000139638	0.00200152	0.000416911	0.000698815	0.00146608	0.00245984	0.000182309	0.000332967	0.00223067	0.00310439	7.74105e-06
	0.0234423	-1.63	0.000634842	0.000165929	0.00221161	0.000484455	0.000791003	0.00162746	0.00268023	0.000216655	0.000390632	0.0024568	0.00345763	9.52793e-06
	0.0239883	-1.62	0.000755273	0.000216321	0.00244656	0.000567434	0.000904378	0.0018089	0.00292318	0.000261407	0.000465374	0.00270133	0.00384205	1.16985e-05
	0.0245471	-1.61	0.000875389	0.000256556	0.00269704	0.000657207	0.00102133	0.0020017	0.00317391	0.000309388	0.000543943	0.00296343	0.00425923	1.43281e-05
	0.0251189	-1.6	0.00102631	0.000304726	0.0029921	0.000773205	0.0011595	0.0022148	0.00344908	0.000374232	0.000639277	0.00324461	0.00471073	1.75059e-05
	0.025704	-1.59	0.00120316	0.000374843	0.00330217	0.000902314	0.00131654	0.00244969	0.00373554	0.00045046	0.000758068	0.00354857	0.00519803	2.13359e-05
	0.0263027	-1.58	0.00138943	0.00044221	0.0036316	0.00104088	0.00148207	0.0026988	0.00403607	0.000530312	0.000881348	0.00387083	0.00572254	2.59401e-05
	0.0269153	-1.57	0.00161638	0.000534123	0.00400218	0.00121415	0.00167671	0.00298094	0.00436169	0.000638446	0.00103135	0.00421782	0.00628554	3.14607e-05
	0.0275423	-1.56	0.00187956	0.000640405	0.00440978	0.00141098	0.00189406	0.0032788	0.00470593	0.000759593	0.00120505	0.00458573	0.0068882	3.80627e-05
	0.0281838	-1.55	0.00216207	0.00075175	0.00483936	0.00162122	0.00212611	0.00359822	0.00506274	0.000889609	0.0013934	0.00497564	0.00753156	4.59374e-05
	0.0288403	-1.54	0.00250686	0.000902777	0.00533116	0.00186921	0.00240501	0.00395739	0.00544734	0.00105164	0.00161571	0.00539279	0.00821648	5.53059e-05
	0.0295121	-1.53	0.00289617	0.001074	0.00586845	0.0021593	0.00270312	0.00434362	0.00584868	0.00123813	0.00186966	0.00583499	0.00894368	6.64224e-05
	0.0301995	-1.52	0.00333285	0.00128007	0.00644516	0.00248866	0.00303682	0.00475666	0.00628613	0.00144767	0.00215665	0.00630309	0.00971365	7.95786e-05
	0.030903	-1.51	0.00383476	0.00151908	0.00708492	0.00284924	0.00340753	0.0052049	0.00674268	0.00169156	0.00248405	0.00679631	0.0105267	9.51083e-05
	0.0316228	-1.5	0.0043827	0.00177026	0.00776088	0.00325105	0.0038104	0.0056818	0.00721558	0.00196239	0.00284583	0.00731564	0.011383	0.000113392
	0.0323594	-1.49	0.0050265	0.00208527	0.00851686	0.00371718	0.00426584	0.00620188	0.00772903	0.00228891	0.00325888	0.00786822	0.0122823	0.000134861
	0.0331131	-1.48	0.00574472	0.00245328	0.00934112	0.00424394	0.00478225	0.00676386	0.00826825	0.00265395	0.00372911	0.00844684	0.0132243	0.000160005
	0.0338844	-1.47	0.00655465	0.00286547	0.0102553	0.00483314	0.00534951	0.00736968	0.00883956	0.00307466	0.00426037	0.00905909	0.0142084	0.000189377
	0.0346737	-1.46	0.00745969	0.00333475	0.0112417	0.00549442	0.00597515	0.00802372	0.00944563	0.0035494	0.00485561	0.00970655	0.0152338	0.000223596
	0.0354813	-1.45	0.00848703	0.00387688	0.0123217	0.00623545	0.00666816	0.00873419	0.0100938	0.00409396	0.00551783	0.0103825	0.0162995	0.00026336
	0.0363078	-1.44	0.00963165	0.00448899	0.0135079	0.00706742	0.00743695	0.00949361	0.0107872	0.00470501	0.00625925	0.0110925	0.0174043	0.000309444
	0.0371535	-1.43	0.010922	0.00518761	0.0147996	0.00799616	0.00828365	0.0103161	0.0115211	0.00539311	0.00708769	0.0118394	0.0185465	0.000362713
	0.0380189	-1.42	0.0123648	0.00598476	0.0162126	0.00902951	0.00922262	0.0112037	0.0123092	0.00616763	0.00801387	0.0126235	0.0197246	0.000424127
	0.0389045	-1.41	0.0139696	0.00688565	0.0177615	0.010184	0.0102592	0.0121604	0.013148	0.00703878	0.00904616	0.0134463	0.0209367	0.000494743
	0.0398107	-1.4	0.0157539	0.00791302	0.0194493	0.011466	0.011405	0.0131874	0.0140528	0.00801651	0.010184	0.0143064	0.0221808	0.000575727
	0.040738	-1.39	0.017738	0.0090655	0.0212997	0.0128885	0.0126713	0.0142982	0.0150244	0.00911506	0.0114384	0.01521	0.0234548	0.000668357
	0.0416869	-1.38	0.0199415	0.0103743	0.0233188	0.0144651	0.01406	0.015497	0.0160741	0.010342	0.0128324	0.0161561	0.0247566	0.000774027
	0.042658	-1.37	0.0223779	0.0118419	0.0255257	0.0162077	0.0155969	0.0167895	0.0172028	0.0117081	0.0143788	0.0171481	0.0260837	0.000894257
	0.0436516	-1.36	0.0250728	0.0134873	0.0279361	0.0181337	0.0172787	0.0181774	0.0184226	0.0132321	0.016078	0.0181956	0.0274339	0.00103069
	0.0446684	-1.35	0.0280525	0.0153358	0.0305711	0.0202567	0.0191287	0.0196671	0.0197431	0.0149187	0.0179426	0.019292	0.0288049	0.0011851
	0.0457088	-1.34	0.0313333	0.0174164	0.0334495	0.0225868	0.0211583	0.0212804	0.021172	0.0167913	0.0199875	0.0204381	0.0301945	0.00135938
	0.0467735	-1.33	0.0349598	0.0197457	0.0365982	0.0251686	0.0233928	0.0230237	0.0227284	0.0188717	0.022236	0.0216481	0.0316005	0.00155559
	0.047863	-1.32	0.0389259	0.0223264	0.0400292	0.0279873	0.0258281	0.0248984	0.024408	0.0211556	0.0246814	0.0229155	0.033021	0.00177589
	0.0489779	-1.31	0.0432766	0.0252035	0.0437711	0.0310701	0.0284986	0.0269131	0.0262341	0.023673	0.027358	0.0242509	0.034454	0.00202257
	0.0501187	-1.3	0.0480388	0.0283975	0.0478471	0.0344488	0.0314102	0.0290859	0.028221	0.0264407	0.0302678	0.0256499	0.035898	0.00229806
	0.0512861	-1.29	0.0532495	0.0319568	0.0522902	0.0381419	0.0345948	0.0314292	0.030396	0.0294753	0.0334382	0.0271451	0.0373516	0.0026049
	0.0524807	-1.28	0.0589236	0.0358789	0.0571215	0.0421601	0.0380542	0.0339504	0.0327445	0.0327922	0.0368694	0.0287025	0.038814	0.00294574
	0.0537032	-1.27	0.0650978	0.0402054	0.0623646	0.0465248	0.041817	0.0366625	0.0353031	0.0364125	0.0405912	0.0303391	0.0402843	0.00332334
	0.0549541	-1.26	0.0718125	0.0449765	0.0680707	0.0512709	0.0459079	0.039593	0.0380918	0.0403644	0.0446128	0.0320664	0.0417624	0.00374053
	0.0562341	-1.25	0.0790856	0.0502197	0.074246	0.0564124	0.050341	0.0427344	0.0411185	0.044654	0.0489583	0.0338845	0.0432485	0.00420021
	0.057544	-1.24	0.0869638	0.0559787	0.0809458	0.0619818	0.0551456	0.046114	0.0444071	0.0493139	0.0536415	0.0358092	0.0447432	0.00470536
	0.0588844	-1.23	0.095472	0.062293	0.0881848	0.0679889	0.0603358	0.049745	0.0479804	0.0543549	0.0586756	0.0378257	0.0462476	0.00525894
	0.060256	-1.22	0.104654	0.0691936	0.0960121	0.0744818	0.065949	0.0536518	0.0518611	0.0598022	0.0640804	0.0399615	0.0477634	0.00586397
	0.0616595	-1.21	0.114539	0.0767244	0.104457	0.08147	0.0719949	0.0578393	0.0560724	0.065681	0.0698701	0.0422086	0.0492928	0.0065234
	0.0630957	-1.2	0.125157	0.0849249	0.11355	0.0889703	0.0784912	0.0623301	0.0606331	0.0719987	0.0760612	0.0445856	0.0508386	0.00724017
	0.0645654	-1.19	0.136545	0.0938381	0.123337	0.0970178	0.0854711	0.0671477	0.065574	0.0787865	0.0826767	0.0470865	0.0524042	0.00801712
	0.0660693	-1.18	0.148735	0.103509	0.133852	0.105632	0.092958	0.0723081	0.0709082	0.0860564	0.089728	0.0497334	0.0539934	0.00885696
	0.0676083	-1.17	0.161758	0.113976	0.145129	0.114837	0.100963	0.0778175	0.0766619	0.0938305	0.0972285	0.0525163	0.0556107	0.00976226
	0.0691831	-1.16	0.175646	0.125285	0.157204	0.124666	0.109518	0.0837103	0.0828702	0.102129	0.105195	0.055462	0.0572613	0.0107354
	0.0707946	-1.15	0.190427	0.137473	0.170114	0.135126	0.11864	0.0900054	0.0895547	0.110961	0.113641	0.0585625	0.0589508	0.0117785
	0.0724436	-1.14	0.206127	0.150586	0.1839	0.146242	0.128351	0.096718	0.0967334	0.120345	0.122583	0.0618311	0.0606855	0.0128936
	0.074131	-1.13	0.222772	0.164661	0.198584	0.158038	0.138672	0.103873	0.104437	0.130298	0.132033	0.065269	0.062472	0.014082
	0.0758578	-1.12	0.240382	0.179739	0.214204	0.170527	0.149622	0.111486	0.11269	0.140824	0.141995	0.068893	0.0643177	0.015345
	0.0776247	-1.11	0.258975	0.195858	0.230784	0.183726	0.161207	0.11958	0.121516	0.151938	0.152489	0.0727127	0.0662303	0.0166835
	0.0794328	-1.1	0.278567	0.213055	0.248355	0.197655	0.173448	0.128168	0.13094	0.163649	0.163518	0.0767365	0.0682181	0.0180979
	0.0812831	-1.09	0.299172	0.231357	0.266935	0.212316	0.186352	0.137271	0.140978	0.17596	0.175082	0.0809674	0.0702898	0.0195879
	0.0831764	-1.08	0.320793	0.250795	0.286545	0.227725	0.199936	0.14691	0.151657	0.188872	0.187194	0.0854261	0.0724543	0.0211531
	0.0851138	-1.07	0.343436	0.271396	0.307205	0.243891	0.214203	0.157099	0.162996	0.20239	0.199854	0.0901006	0.074721	0.0227923
	0.0870964	-1.06	0.367097	0.29318	0.328924	0.260815	0.229161	0.167854	0.175011	0.216512	0.213064	0.095017	0.0770996	0.0245037
	0.0891251	-1.05	0.391776	0.316162	0.351709	0.278501	0.244812	0.179194	0.187729	0.231235	0.226824	0.100176	0.0796	0.0262851
	0.0912011	-1.04	0.417456	0.340351	0.375565	0.296941	0.261153	0.191127	0.201149	0.24655	0.241124	0.105586	0.0822323	0.0281335
	0.0933254	-1.03	0.444121	0.365754	0.40049	0.316133	0.278186	0.203667	0.215286	0.262443	0.255966	0.111273	0.0850067	0.0300454
	0.0954993	-1.02	0.47175	0.392368	0.42647	0.336068	0.295899	0.216827	0.230151	0.278903	0.271344	0.117223	0.0879334	0.0320166
	0.0977237	-1.01	0.500309	0.420185	0.453492	0.356732	0.314286	0.230608	0.245753	0.29591	0.28724	0.123454	0.0910227	0.0340422
	0.1	-1	0.529763	0.449196	0.481533	0.37811	0.333333	0.245021	0.262089	0.313446	0.303643	0.129981	0.0942847	0.0361168
	0.102329	-0.99	0.560074	0.479368	0.510565	0.400183	0.353022	0.260067	0.279158	0.3315	0.320542	0.136811	0.0977295	0.0382342
	0.104713	-0.98	0.59119	0.510675	0.540556	0.422926	0.373332	0.275744	0.296956	0.350025	0.337921	0.143947	0.101367	0.0403878
	0.107152	-0.97	0.623059	0.54308	0.571458	0.446307	0.394238	0.292059	0.315478	0.369004	0.355755	0.151411	0.105206	0.0425702
	0.109648	-0.96	0.655618	0.576531	0.603222	0.470301	0.415716	0.308999	0.334713	0.388401	0.374024	0.159195	0.109257	0.0447737
	0.112202	-0.95	0.6888	0.610984	0.635794	0.494863	0.437736	0.326557	0.354639	0.408186	0.392698	0.167313	0.113527	0.0469898
	0.114815	-0.94	0.722533	0.646357	0.669106	0.519956	0.460259	0.344728	0.375236	0.428314	0.411756	0.175779	0.118025	0.0492097
	0.11749	-0.93	0.756732	0.682585	0.703087	0.545538	0.483249	0.363488	0.396478	0.448744	0.431167	0.184592	0.122759	0.0514242
	0.120226	-0.92	0.791313	0.719584	0.737658	0.571561	0.506668	0.382827	0.418336	0.469439	0.450898	0.19377	0.127734	0.0536237
	0.123027	-0.91	0.826185	0.757262	0.772732	0.597971	0.53047	0.402721	0.440775	0.490353	0.470916	0.203311	0.132958	0.0557985
	0.125893	-0.9	0.86125	0.795524	0.808216	0.624713	0.554604	0.423146	0.463754	0.511436	0.491184	0.213223	0.138434	0.0579383
	0.128825	-0.89	0.896406	0.834256	0.844012	0.651734	0.579024	0.444072	0.487231	0.532639	0.511661	0.223516	0.144167	0.0600331
	0.131826	-0.88	0.931547	0.873348	0.880011	0.678966	0.603677	0.465472	0.511155	0.553912	0.532315	0.23419	0.150161	0.0620726
	0.134896	-0.87	0.966563	0.912673	0.916105	0.706347	0.628507	0.487308	0.535475	0.5752	0.553095	0.24525	0.156416	0.0640466
	0.138038	-0.86	1.00134	0.952103	0.952175	0.733815	0.653457	0.50954	0.560134	0.596452	0.573962	0.256698	0.162933	0.0659451
	0.141254	-0.85	1.03576	0.991503	0.988101	0.761299	0.678466	0.53213	0.585071	0.617624	0.59487	0.268538	0.169712	0.0677582
	0.144544	-0.84	1.06971	1.03073	1.02376	0.788726	0.703476	0.555033	0.610225	0.638656	0.615773	0.280778	0.176751	0.0694763
	0.147911	-0.83	1.10307	1.06964	1.05902	0.816024	0.728424	0.5782	0.635524	0.659492	0.636625	0.293408	0.184045	0.0710903
	0.151356	-0.82	1.13571	1.10809	1.09376	0.843124	0.753249	0.601581	0.660902	0.680085	0.657382	0.306433	0.191591	0.0725915
	0.154882	-0.81	1.16752	1.14592	1.12784	0.869949	0.777882	0.625119	0.686278	0.70038	0.677992	0.319851	0.199381	0.0739718
	0.158489	-0.8	1.19838	1.18297	1.16114	0.896427	0.802262	0.648762	0.711581	0.72033	0.698408	0.333654	0.207407	0.0752237
	0.162181	-0.79	1.22816	1.21911	1.19352	0.922483	0.826323	0.672451	0.736733	0.739884	0.718584	0.347838	0.21566	0.0763404
	0.165959	-0.78	1.25676	1.25416	1.22485	0.948044	0.850003	0.696125	0.761657	0.758997	0.738473	0.362396	0.224128	0.0773161
	0.169824	-0.77	1.28407	1.28799	1.25501	0.973035	0.873235	0.719723	0.786271	0.777624	0.758023	0.377323	0.232799	0.0781455
	0.17378	-0.76	1.30997	1.32043	1.28387	0.997388	0.89596	0.743182	0.810496	0.795719	0.77719	0.392607	0.241658	0.0788246
	0.177828	-0.75	1.33436	1.35136	1.31131	1.02103	0.918113	0.766435	0.834256	0.813244	0.795927	0.408237	0.250688	0.07935
	0.18197	-0.74	1.35714	1.38062	1.33722	1.04389	0.939636	0.789422	0.857467	0.830161	0.814191	0.424197	0.259873	0.0797196
	0.186209	-0.73	1.37823	1.40808	1.36148	1.06591	0.960471	0.812076	0.880055	0.846436	0.831937	0.440472	0.269192	0.0799323
	0.190546	-0.72	1.39754	1.43362	1.384	1.08703	0.980559	0.834329	0.901945	0.862039	0.849124	0.457044	0.278626	0.0799878
	0.194984	-0.71	1.41499	1.45712	1.40468	1.10717	0.999849	0.856119	0.923064	0.876942	0.865713	0.473898	0.288152	0.0798871
	0.199526	-0.7	1.43051	1.47847	1.42344	1.1263	1.01829	0.877379	0.943341	0.891116	0.881662	0.491006	0.297747	0.0796323
	0.204174	-0.69	1.44405	1.49757	1.44018	1.14434	1.03583	0.898049	0.96271	0.904542	0.896934	0.508348	0.307387	0.0792266
	0.20893	-0.68	1.45555	1.51434	1.45485	1.16126	1.05242	0.918065	0.981113	0.917204	0.911496	0.525896	0.317046	0.078674
	0.213796	-0.67	1.46497	1.52869	1.46739	1.17701	1.06802	0.93737	0.998488	0.929086	0.925317	0.543622	0.326698	0.0779797
	0.218776	-0.66	1.47228	1.54057	1.47775	1.19154	1.08259	0.955903	1.01478	0.940176	0.938365	0.561496	0.336317	0.0771501
	0.223872	-0.65	1.47746	1.54993	1.48588	1.20482	1.0961	0.973613	1.02994	0.950462	0.950616	0.579486	0.345874	0.0761921
	0.229087	-0.64	1.4805	1.55672	1.49177	1.21681	1.10851	0.990445	1.04393	0.95994	0.962043	0.597559	0.355342	0.075114
	0.234423	-0.63	1.48138	1.56093	1.49539	1.2275	1.11979	1.00635	1.05672	0.968609	0.972627	0.61568	0.364691	0.0739244
	0.239883	-0.62	1.48013	1.56254	1.49674	1.23684	1.12992	1.02128	1.06826	0.976468	0.982344	0.633804	0.373895	0.072633
	0.245471	-0.61	1.47675	1.56156	1.49583	1.24483	1.13887	1.0352	1.07853	0.983521	0.991179	0.651895	0.382924	0.0712502
	0.251189	-0.6	1.47127	1.55801	1.49267	1.25145	1.14663	1.04806	1.08752	0.989771	0.999119	0.669913	0.39175	0.0697868
	0.25704	-0.59	1.46374	1.55192	1.4873	1.2567	1.15318	1.05983	1.09521	0.995227	1.00615	0.68781	0.400345	0.0682542
	0.263027	-0.58	1.45419	1.54333	1.47974	1.26055	1.15851	1.07049	1.10159	0.999898	1.01227	0.705543	0.408683	0.0666643
	0.269153	-0.57	1.44269	1.5323	1.47004	1.26303	1.16262	1.08	1.10665	1.00379	1.01747	0.723064	0.416737	0.065029
	0.275423	-0.56	1.42928	1.5189	1.45827	1.26412	1.16551	1.08835	1.11042	1.00693	1.02174	0.740324	0.424481	0.0633607
	0.281838	-0.55	1.41405	1.50321	1.44449	1.26384	1.16716	1.09552	1.11288	1.00931	1.0251	0.757277	0.431891	0.0616719
	0.288403	-0.54	1.39707	1.48532	1.42877	1.26219	1.1676	1.10149	1.11407	1.01096	1.02752	0.773872	0.438944	0.0599748
	0.295121	-0.53	1.37841	1.46534	1.4112	1.25921	1.16682	1.10625	1.11399	1.0119	1.02903	0.790058	0.445618	0.0582817
	0.301995	-0.52	1.35818	1.44337	1.39186	1.25489	1.16484	1.10981	1.11267	1.01212	1.02963	0.805786	0.451892	0.0566048
	0.30903	-0.51	1.33646	1.41954	1.37086	1.24928	1.16168	1.11216	1.11014	1.01167	1.02933	0.821004	0.457747	0.0549557
	0.316228	-0.5	1.31335	1.39397	1.34828	1.2424	1.15734	1.11332	1.10643	1.01054	1.02813	0.83566	0.463166	0.0533457
	0.323594	-0.49	1.28895	1.36679	1.32424	1.23427	1.15187	1.11328	1.10157	1.00875	1.02605	0.849708	0.468133	0.0517856
	0.331131	-0.48	1.26336	1.33814	1.29885	1.22493	1.14527	1.11207	1.09562	1.00633	1.0231	0.863096	0.472635	0.0502855
	0.338844	-0.47	1.2367	1.30815	1.27222	1.21443	1.13758	1.1097	1.0886	1.00329	1.01931	0.875776	0.476658	0.048855
	0.346737	-0.46	1.20907	1.27698	1.24447	1.20279	1.12883	1.10619	1.08056	0.999634	1.01468	0.887702	0.480194	0.0475027
	0.354813	-0.45	1.18057	1.24476	1.21571	1.19006	1.11905	1.10156	1.07155	0.995392	1.00923	0.898826	0.483233	0.0462366
	0.363078	-0.44	1.15132	1.21165	1.18605	1.17629	1.10828	1.09586	1.06162	0.990572	1.00299	0.909108	0.48577	0.0450635
	0.371535	-0.43	1.12142	1.17777	1.15563	1.16151	1.09656	1.0891	1.0508	0.985189	0.99598	0.918506	0.487799	0.0439895
	0.380189	-0.42	1.09098	1.14328	1.12454	1.14579	1.08392	1.08133	1.03917	0.979258	0.988213	0.926981	0.489318	0.0430195
	0.389045	-0.41	1.0601	1.10832	1.09291	1.12916	1.0704	1.07257	1.02675	0.97279	0.979718	0.934497	0.490326	0.0421577
	0.398107	-0.4	1.02888	1.07302	1.06086	1.11168	1.05606	1.06287	1.01361	0.965798	0.970516	0.941022	0.490825	0.041407
	0.40738	-0.39	0.997416	1.0375	1.02848	1.09341	1.04094	1.05227	0.999799	0.958294	0.960633	0.946527	0.490817	0.0407692
	0.416869	-0.38	0.965811	1.00191	0.99589	1.07439	1.02508	1.04082	0.985356	0.95029	0.950094	0.950986	0.490308	0.0402452
	0.42658	-0.37	0.934151	0.966358	0.963187	1.05468	1.00853	1.02855	0.970337	0.941798	0.938924	0.954376	0.489304	0.0398349
	0.436516	-0.36	0.902525	0.930957	0.930476	1.03433	0.991344	1.01552	0.954788	0.932828	0.92715	0.956681	0.487814	0.039537
	0.446684	-0.35	0.871014	0.895815	0.897847	1.01341	0.973565	1.00177	0.938758	0.923391	0.914798	0.957887	0.485847	0.0393493
	0.457088	-0.34	0.839696	0.861033	0.865388	0.991951	0.955246	0.987348	0.922292	0.913498	0.901896	0.957982	0.483416	0.0392689
	0.467735	-0.33	0.808643	0.826703	0.833184	0.970027	0.936438	0.972302	0.905437	0.903161	0.888472	0.956966	0.480535	0.0392917
	0.47863	-0.32	0.777924	0.792908	0.801314	0.947688	0.91719	0.956681	0.888235	0.892389	0.874553	0.954835	0.477218	0.039413
	0.489779	-0.31	0.747601	0.759724	0.769848	0.924987	0.897553	0.940532	0.870729	0.881196	0.860168	0.951594	0.473481	0.0396274
	0.501187	-0.3	0.717731	0.727221	0.738854	0.901979	0.877577	0.923903	0.85296	0.869592	0.845346	0.947252	0.469344	0.0399287
	0.512861	-0.29	0.688367	0.695457	0.708392	0.878717	0.857312	0.906842	0.834968	0.85759	0.830116	0.941821	0.464826	0.0403103
	0.524807	-0.28	0.659556	0.664484	0.678517	0.855257	0.836808	0.889396	0.816792	0.845202	0.814509	0.935319	0.459947	0.0407653
	0.537032	-0.27	0.63134	0.634348	0.649278	0.831645	0.816111	0.871609	0.798467	0.832443	0.798552	0.927769	0.454729	0.0412861
	0.549541	-0.26	0.603757	0.605084	0.620717	0.807935	0.795272	0.853528	0.780029	0.819327	0.782278	0.919196	0.449196	0.0418653
	0.562341	-0.25	0.576837	0.576722	0.592872	0.784174	0.774335	0.835194	0.761511	0.805868	0.765716	0.909631	0.443372	0.0424952
	0.57544	-0.24	0.550612	0.549285	0.565775	0.760412	0.753346	0.816653	0.742948	0.792083	0.7489	0.899108	0.437283	0.043168
	0.588844	-0.23	0.525102	0.522787	0.539453	0.736693	0.732348	0.797943	0.724371	0.777989	0.731857	0.887665	0.430953	0.0438764
	0.60256	-0.22	0.500325	0.49724	0.513925	0.713063	0.711383	0.779105	0.705808	0.763601	0.714618	0.875341	0.424411	0.044613
	0.616595	-0.21	0.4763	0.472647	0.489211	0.689564	0.690494	0.760176	0.68729	0.748942	0.697219	0.862184	0.417683	0.045371
	0.630957	-0.2	0.453036	0.449006	0.465321	0.66624	0.669718	0.741193	0.668845	0.73403	0.679687	0.848241	0.410797	0.0461439
	0.645654	-0.19	0.430536	0.42631	0.442262	0.643123	0.649091	0.722187	0.650498	0.718884	0.662055	0.83356	0.403782	0.046926
	0.660693	-0.18	0.408814	0.404552	0.420038	0.620258	0.628653	0.703198	0.632275	0.703527	0.644355	0.818192	0.396666	0.0477121
	0.676083	-0.17	0.387862	0.383717	0.398646	0.597675	0.608433	0.684252	0.614201	0.687976	0.626615	0.802188	0.389476	0.0484977
	0.691831	-0.16	0.367686	0.363787	0.378086	0.57541	0.588467	0.665383	0.5963	0.672263	0.608871	0.785613	0.382241	0.0492794
	0.707946	-0.15	0.348271	0.344738	0.358344	0.55349	0.568781	0.646612	0.578593	0.656405	0.591147	0.76852	0.374989	0.0500544
	0.724436	-0.14	0.329622	0.326555	0.33942	0.53195	0.549405	0.627972	0.561102	0.640429	0.573482	0.750962	0.367746	0.050821
	0.74131	-0.13	0.31172	0.309207	0.321293	0.51081	0.530359	0.609484	0.543849	0.624357	0.555899	0.732999	0.360539	0.0515784
	0.758578	-0.12	0.294563	0.292673	0.303955	0.490098	0.511678	0.591172	0.526847	0.608217	0.53843	0.714692	0.353394	0.0523269
	0.776247	-0.11	0.278131	0.276918	0.287379	0.46983	0.49337	0.573054	0.510114	0.592027	0.521097	0.696093	0.346335	0.0530678
	0.794328	-0.1	0.262414	0.261922	0.271561	0.450037	0.475468	0.555155	0.493674	0.575824	0.503938	0.677267	0.339386	0.0538032
	0.812831	-0.09	0.247386	0.247651	0.256468	0.430723	0.457975	0.537488	0.477537	0.559623	0.486972	0.658264	0.332568	0.0545364
	0.831764	-0.08	0.23305	0.234079	0.24209	0.411917	0.440922	0.520075	0.461722	0.543457	0.470226	0.639141	0.325901	0.0552714
	0.851138	-0.07	0.219369	0.221172	0.22839	0.393619	0.424311	0.50293	0.446238	0.527339	0.45372	0.619952	0.319405	0.0560134
	0.870964	-0.06	0.206342	0.208908	0.215363	0.375855	0.408162	0.486065	0.431098	0.511309	0.437486	0.600749	0.313097	0.0567681
	0.891251	-0.05	0.19393	0.197249	0.202973	0.358618	0.392472	0.469491	0.416312	0.495377	0.421532	0.58158	0.306992	0.057542
	0.912011	-0.04	0.182129	0.186177	0.1912	0.341928	0.37726	0.45322	0.401886	0.479576	0.405882	0.562497	0.301103	0.0583422
	0.933254	-0.03	0.170923	0.175665	0.180027	0.325791	0.362535	0.437271	0.387838	0.463931	0.390572	0.543544	0.295442	0.0591765
	0.954993	-0.02	0.160266	0.165664	0.16942	0.310201	0.348285	0.421643	0.374163	0.448455	0.375597	0.524761	0.290019	0.0600527
	0.977237	-0.01	0.150175	0.156188	0.159365	0.295169	0.334534	0.406353	0.360881	0.433176	0.360987	0.506193	0.28484	0.0609793
	1	0	0.140599	0.147191	0.149818	0.280681	0.321265	0.391401	0.347983	0.418104	0.346745	0.487875	0.279912	0.0619647
	1.02329	0.01	0.131525	0.138637	0.140783	0.266749	0.308484	0.376793	0.335482	0.403262	0.332879	0.46984	0.275238	0.0630174
	1.04713	0.02	0.122955	0.130534	0.132236	0.253375	0.2962	0.362544	0.32338	0.38868	0.31942	0.452127	0.27082	0.0641455
	1.07152	0.03	0.114839	0.122834	0.124137	0.240536	0.284391	0.348643	0.311668	0.374351	0.306355	0.434759	0.266658	0.0653572
	1.09648	0.04	0.107167	0.115528	0.116472	0.228237	0.27306	0.335109	0.300351	0.360307	0.293695	0.417768	0.26275	0.06666
	1.12202	0.05	0.0999398	0.108609	0.109238	0.216486	0.262215	0.321943	0.289437	0.346569	0.281461	0.401174	0.259094	0.068061
	1.14815	0.06	0.0931048	0.10203	0.102383	0.205254	0.25182	0.309132	0.278909	0.333129	0.269637	0.384995	0.255684	0.0695666
	1.1749	0.07	0.0866634	0.0957938	0.0959071	0.194532	0.241894	0.296692	0.268774	0.320007	0.258231	0.369251	0.252515	0.0711823
	1.20226	0.08	0.0806003	0.0898743	0.0898001	0.184318	0.232416	0.284625	0.259011	0.307215	0.247247	0.35396	0.24958	0.0729128
	1.23027	0.09	0.0748865	0.0842632	0.0840252	0.174613	0.223379	0.272924	0.249635	0.294756	0.236679	0.339136	0.24687	0.0747616
	1.25893	0.1	0.0695345	0.0789732	0.078602	0.1654	0.214781	0.2616	0.240645	0.282648	0.226539	0.324786	0.244378	0.0767313
	1.28825	0.11	0.0644857	0.0739423	0.0734732	0.15665	0.206593	0.250637	0.23201	0.270875	0.216808	0.310917	0.242092	0.0788233
	1.31826	0.12	0.0597519	0.0691748	0.0686407	0.148361	0.198804	0.240039	0.223741	0.259459	0.207482	0.29754	0.240005	0.0810375
	1.34896	0.13	0.0553098	0.0646723	0.064078	0.140524	0.191414	0.229808	0.215825	0.248394	0.198558	0.284655	0.238105	0.0833728
	1.38038	0.14	0.0511508	0.0604157	0.0597962	0.133122	0.18441	0.219936	0.208251	0.237688	0.190036	0.27226	0.236382	0.0858266
	1.41254	0.15	0.0472451	0.0563864	0.0557665	0.126141	0.177773	0.210419	0.201012	0.227337	0.181909	0.260364	0.234826	0.0883951
	1.44544	0.16	0.043598	0.0525861	0.0519741	0.119566	0.17149	0.201265	0.194094	0.217345	0.174162	0.248964	0.233428	0.091073
	1.47911	0.17	0.0401796	0.048996	0.0484182	0.113385	0.165552	0.192457	0.1875	0.207708	0.16679	0.238051	0.232176	0.0938539
	1.51356	0.18	0.0369878	0.0456057	0.0450808	0.107586	0.159937	0.183995	0.181209	0.198425	0.15978	0.227624	0.231063	0.0967301
	1.54882	0.19	0.0340157	0.0424131	0.0419482	0.102148	0.154636	0.175876	0.17522	0.189487	0.153126	0.217684	0.230079	0.0996924
	1.58489	0.2	0.0312488	0.0393985	0.0390201	0.0970607	0.149633	0.168098	0.169514	0.180892	0.146826	0.208219	0.229217	0.102731
	1.62181	0.21	0.028672	0.0365699	0.036275	0.092309	0.144914	0.160649	0.164087	0.172632	0.140869	0.199225	0.228468	0.105834
	1.65959	0.22	0.0262741	0.0339012	0.0337126	0.0878766	0.140473	0.153527	0.158924	0.164706	0.135231	0.190689	0.227826	0.10899
	1.69824	0.23	0.024051	0.0313999	0.0313193	0.0837505	0.136282	0.146724	0.154024	0.157108	0.129902	0.182603	0.227286	0.112186
	1.7378	0.24	0.0219871	0.0290547	0.029087	0.0799139	0.132343	0.140243	0.149372	0.149828	0.124888	0.174954	0.226842	0.115408
	1.77828	0.25	0.0200702	0.0268516	0.0270047	0.0763525	0.128633	0.134071	0.14496	0.142865	0.120173	0.167742	0.226489	0.118643
	1.8197	0.26	0.0182984	0.024779	0.0250654	0.0730574	0.125142	0.128192	0.140778	0.136205	0.115748	0.160957	0.226224	0.121874
	1.86209	0.27	0.0166456	0.022835	0.023254	0.069989	0.121849	0.122603	0.136809	0.129835	0.111589	0.15458	0.226044	0.125088
	1.90546	0.28	0.015134	0.0210316	0.0215762	0.0671668	0.118759	0.117304	0.13306	0.123769	0.107709	0.148609	0.225947	0.12827
	1.94984	0.29	0.0137378	0.0193429	0.0200198	0.0645671	0.115844	0.11229	0.129512	0.117982	0.104079	0.143027	0.22593	0.131403
	1.99526	0.3	0.0124518	0.0177697	0.0185793	0.062165	0.113104	0.107547	0.126156	0.112469	0.100704	0.137834	0.225993	0.134475
	2.04174	0.31	0.011262	0.016289	0.0172412	0.0599512	0.110515	0.103064	0.122975	0.107224	0.0975618	0.132992	0.226134	0.137469
	2.0893	0.32	0.0101765	0.0149253	0.0160056	0.0579228	0.108085	0.0988413	0.11999	0.102244	0.0946625	0.128526	0.226352	0.140373
	2.13796	0.33	0.00918344	0.013662	0.0148721	0.0560663	0.105792	0.0948705	0.11717	0.097518	0.0919801	0.124416	0.226646	0.143173
	2.18776	0.34	0.00826879	0.0124853	0.013813	0.0543565	0.103626	0.0911348	0.114508	0.0930324	0.0895125	0.12064	0.227017	0.145857
	2.23872	0.35	0.0074403	0.0113985	0.0128506	0.0527928	0.101582	0.0876425	0.11201	0.0887914	0.0872473	0.117197	0.227463	0.148413
	2.29087	0.36	0.00667925	0.0103889	0.0119555	0.0513547	0.0996465	0.0843763	0.109662	0.0847772	0.0851802	0.114068	0.227983	0.150831
	2.34423	0.37	0.0059895	0.00945084	0.0111413	0.0500457	0.0978181	0.0813314	0.107455	0.0809931	0.0833106	0.111259	0.228576	0.153103
	2.39883	0.38	0.00535645	0.00858801	0.0103884	0.0488345	0.0960767	0.0784921	0.105385	0.0774278	0.081624	0.10874	0.22924	0.155219
	2.45471	0.39	0.0047812	0.0077918	0.00969729	0.0477249	0.0944289	0.0758638	0.103444	0.0740708	0.0801171	0.106515	0.229973	0.157175
	2.51189	0.4	0.0042632	0.00705944	0.00907019	0.0467169	0.0928711	0.0734367	0.101632	0.0709306	0.078782	0.104565	0.230772	0.158964
	2.5704	0.41	0.00379424	0.00638554	0.00849041	0.0457879	0.0913852	0.0711969	0.0999378	0.0679895	0.0776063	0.102895	0.231634	0.160585
	2.63027	0.42	0.00337031	0.00576409	0.00795701	0.0449361	0.0899669	0.0691431	0.0983675	0.0652484	0.0765929	0.10148	0.232555	0.162035
	2.69153	0.43	0.00298866	0.00519715	0.00747032	0.0441514	0.0886212	0.0672815	0.0969134	0.0627009	0.0757301	0.100329	0.233529	0.163315
	2.75423	0.44	0.0026444	0.00467714	0.00702495	0.0434207	0.0873324	0.0655872	0.0955608	0.0603398	0.0750123	0.0994179	0.234551	0.164426
	2.81838	0.45	0.002334	0.0042041	0.00661424	0.0427502	0.0860978	0.0640578	0.0943099	0.0581667	0.0744365	0.0987511	0.235615	0.165371
	2.88403	0.46	0.00205622	0.00377229	0.00623066	0.0421298	0.0849176	0.062691	0.0931642	0.056174	0.0739886	0.0983152	0.236714	0.166156
	2.95121	0.47	0.00180635	0.00338	0.00588105	0.0415498	0.083778	0.0614766	0.0921108	0.0543561	0.0736666	0.0981095	0.23784	0.166786
	3.01995	0.48	0.00158387	0.0030244	0.00555574	0.0410105	0.0826814	0.0604154	0.0911485	0.0527154	0.0734706	0.0981183	0.238984	0.167271
	3.0903	0.49	0.00138649	0.00270136	0.00525859	0.0405078	0.0816331	0.0594988	0.0902748	0.051246	0.0733836	0.0983362	0.240137	0.167619
	3.16228	0.5	0.0012118	0.00240479	0.00498012	0.0400321	0.0806227	0.0587275	0.0894831	0.0499442	0.0734075	0.0987524	0.241291	0.167841
	3.23594	0.51	0.00105501	0.00213909	0.00472492	0.0395914	0.0796523	0.0580937	0.0887755	0.0488082	0.0735428	0.0993732	0.242434	0.16795
	3.31131	0.52	0.000919464	0.00189918	0.00448733	0.0391753	0.0787139	0.057592	0.088144	0.0478341	0.0737753	0.100177	0.243558	0.167958
	3.38844	0.53	0.00079943	0.00168171	0.00426374	0.0387817	0.0778104	0.0572191	0.0875854	0.0470165	0.0741022	0.101179	0.244652	0.167879
	3.46737	0.54	0.00069512	0.00148635	0.00405356	0.0384118	0.0769389	0.0569712	0.0870976	0.0463533	0.0745153	0.102361	0.245706	0.167729
	3.54813	0.55	0.000598815	0.00130979	0.00385601	0.0380622	0.0760975	0.056841	0.0866693	0.0458394	0.0750099	0.103717	0.246709	0.167523
	3.63078	0.56	0.000517028	0.00115408	0.00366804	0.0377385	0.0752879	0.0568304	0.086313	0.0454732	0.0755852	0.105243	0.247652	0.167277
	3.71535	0.57	0.000444425	0.00101483	0.00348691	0.0374349	0.0745068	0.0569352	0.0860202	0.0452552	0.0762305	0.106924	0.248525	0.167007
	3.80189	0.58	0.00038021	0.000890661	0.00331738	0.037153	0.0737564	0.0571477	0.0857851	0.0451796	0.0769387	0.108772	0.24932	0.16673
	3.89045	0.59	0.000325755	0.000781122	0.00315509	0.0368932	0.0730351	0.0574751	0.0856027	0.0452438	0.0777116	0.110774	0.250029	0.166463
	3.98107	0.6	0.000279903	0.000678944	0.00300039	0.0366539	0.0723433	0.057905	0.0854773	0.0454432	0.0785416	0.112921	0.250643	0.166222
	4.0738	0.61	0.000238238	0.000593275	0.0028515	0.0364368	0.0716823	0.0584377	0.0854044	0.0457622	0.0794179	0.115211	0.251157	0.166023
	4.16869	0.62	0.000203827	0.00051733	0.00270617	0.0362412	0.0710545	0.0590748	0.0853809	0.0462195	0.0803379	0.11764	0.251566	0.165882
	4.2658	0.63	0.000172323	0.000447799	0.00256871	0.0360728	0.0704594	0.0598034	0.0854019	0.0467963	0.0813012	0.120194	0.251865	0.165814
	4.36516	0.64	0.000145994	0.00038895	0.00243565	0.0359241	0.0698964	0.0606321	0.0854645	0.0474922	0.0823005	0.122883	0.252051	0.165834
	4.46684	0.65	0.000122473	0.000330123	0.00230594	0.0358053	0.0693643	0.061555	0.0855746	0.0482984	0.0833369	0.125692	0.252122	0.165955
	4.57088	0.66	0.000101397	0.000284714	0.00218121	0.0357127	0.0688681	0.0625642	0.0857248	0.0492183	0.0843985	0.128612	0.252079	0.166189
	4.67735	0.67	8.50294e-05	0.000244899	0.00205951	0.0356452	0.0684064	0.0636667	0.0859157	0.0502422	0.085483	0.131644	0.251923	0.166549
	4.7863	0.68	7.10186e-05	0.000209998	0.00194176	0.0356028	0.0679771	0.0648512	0.0861455	0.051362	0.0865874	0.134771	0.251656	0.167045
	4.89779	0.69	5.90594e-05	0.000180745	0.00182779	0.0355891	0.0675832	0.0661188	0.086411	0.0525734	0.087707	0.137994	0.251282	0.167687
	5.01187	0.7	4.89319e-05	0.000152783	0.0017177	0.0356039	0.0672289	0.0674654	0.0867117	0.053875	0.0888404	0.141304	0.250807	0.168482
	5.12861	0.71	4.11218e-05	0.000130996	0.00160967	0.0356417	0.0669093	0.0688888	0.0870459	0.055258	0.0899857	0.144691	0.250237	0.169438
	5.24807	0.72	3.44733e-05	0.000109648	0.00150759	0.0357087	0.0666261	0.0703835	0.0874147	0.056718	0.091134	0.148152	0.249581	0.170561
	5.37032	0.73	2.88288e-05	9.23487e-05	0.00140768	0.0358022	0.0663788	0.0719472	0.0878138	0.0582497	0.0922923	0.151671	0.248848	0.171856
	5.49541	0.74	2.40492e-05	7.87433e-05	0.00131357	0.0359178	0.0661688	0.073578	0.0882425	0.0598472	0.0934514	0.155243	0.248049	0.173327
	5.62341	0.75	2.00128e-05	6.5818e-05	0.00122339	0.0360566	0.0659963	0.0752688	0.0887007	0.0614942	0.0946104	0.158855	0.247195	0.174975
	5.7544	0.76	1.58511e-05	5.58897e-05	0.00113786	0.0362198	0.0658582	0.0770154	0.0891837	0.0631946	0.0957689	0.162498	0.246298	0.176804
	5.88844	0.77	1.14631e-05	4.73439e-05	0.00105519	0.0364053	0.0657542	0.0788154	0.0896941	0.0649408	0.0969253	0.166164	0.245372	0.178813
	6.0256	0.78	9.49166e-06	4.00075e-05	0.000977257	0.0366087	0.0656827	0.0806631	0.090227	0.0667232	0.0980745	0.169839	0.244432	0.181004
	6.16595	0.79	7.83975e-06	3.37259e-05	0.000903072	0.0368289	0.0656458	0.0825551	0.0907891	0.0685371	0.0992187	0.17351	0.243492	0.183374
	6.30957	0.8	5.59892e-06	2.83616e-05	0.000832646	0.0370635	0.0656396	0.0844833	0.091373	0.0703741	0.100353	0.17717	0.242566	0.185924
	6.45654	0.81	3.79195e-06	2.37925e-05	0.000765173	0.0373094	0.0656638	0.0864432	0.0919774	0.072231	0.101477	0.18081	0.24167	0.188652
	6.60693	0.82	2.2314e-06	1.87274e-05	0.000701502	0.037566	0.065714	0.0884298	0.0926002	0.0740981	0.102591	0.184414	0.24082	0.191554
	6.76083	0.83	1.03753e-06	1.56558e-05	0.000642521	0.0378302	0.06579	0.0904362	0.0932438	0.0759692	0.103696	0.187968	0.240031	0.19463
	6.91831	0.84	8.49906e-07	1.30558e-05	0.000587117	0.0380967	0.0658876	0.0924568	0.0939017	0.0778417	0.104789	0.191463	0.239318	0.197876
	7.07946	0.85	6.94473e-07	1.08608e-05	0.000534325	0.0383662	0.0660055	0.0944869	0.0945719	0.0797087	0.105869	0.194885	0.238696	0.201291
	7.24436	0.86	5.66049e-07	9.01267e-06	0.000486025	0.0386339	0.0661402	0.0965157	0.095257	0.0815625	0.106936	0.198226	0.238179	0.204872
	7.4131	0.87	4.60221e-07	6.35868e-06	0.000441028	0.038896	0.0662888	0.0985381	0.0959506	0.0833979	0.107989	0.201474	0.23778	0.208616
	7.58578	0.88	3.73245e-07	5.26164e-06	0.000399234	0.0391504	0.0664481	0.10055	0.0966517	0.0852075	0.109026	0.204618	0.237513	0.212521
	7.76247	0.89	3.0195e-07	4.34306e-06	0.000360526	0.0393953	0.0666143	0.102542	0.0973566	0.0869886	0.110047	0.207645	0.23739	0.216587
	7.94328	0.9	2.43664e-07	2.32733e-06	0.000324782	0.0396269	0.0667841	0.10451	0.098066	0.0887387	0.111054	0.210552	0.237421	0.220811
	8.12831	0.91	1.96137e-07	1.91677e-06	0.000291059	0.0398423	0.066955	0.106444	0.0987746	0.0904505	0.112045	0.213323	0.237615	0.225193
	8.31764	0.92	1.57487e-07	1.57469e-06	0.000260994	0.0400382	0.0671243	0.108339	0.0994773	0.0921177	0.113019	0.215954	0.237983	0.229733
	8.51138	0.93	1.26137e-07	1.29044e-06	0.000232541	0.0402123	0.0672878	0.110187	0.100174	0.0937379	0.113974	0.218436	0.23853	0.23443
	8.70964	0.94	1.00776e-07	1.05485e-06	0.000207562	0.0403647	0.0674419	0.111982	0.100863	0.0953084	0.11491	0.220762	0.239263	0.239285
	8.91251	0.95	8.03124e-08	8.60122e-07	0.000184804	0.0404898	0.0675834	0.113715	0.101542	0.0968276	0.115826	0.222926	0.240187	0.244299
	9.12011	0.96	6.38445e-08	6.99589e-07	0.000164131	0.0405891	0.0677082	0.115384	0.102204	0.0982912	0.11672	0.224921	0.241303	0.249473
	9.33254	0.97	5.06266e-08	5.67598e-07	0.000145406	0.0406589	0.0678155	0.116981	0.102847	0.0996953	0.117591	0.226743	0.242615	0.254811
	9.54993	0.98	4.0045e-08	4.59359e-07	0.000128495	0.0406975	0.0678985	0.1185	0.103469	0.101037	0.118442	0.228397	0.244121	0.260313
	9.77237	0.99	3.1596e-08	3.70833e-07	0.000113268	0.0407035	0.0679589	0.119936	0.104066	0.102314	0.119269	0.229876	0.245821	0.265983
	10	1	2.48674e-08	2.9862e-07	9.95961e-05	0.0406758	0.06799	0.121282	0.104637	0.103526	0.120071	0.231176	0.247712	0.271823
	10.2329	1.01	1.95228e-08	2.39868e-07	8.73557e-05	0.0406133	0.067991	0.122536	0.105176	0.104671	0.120849	0.232302	0.249789	0.277838
	10.4713	1.02	1.52887e-08	1.92195e-07	7.64284e-05	0.0405152	0.0679597	0.12369	0.105684	0.105746	0.121599	0.233253	0.252047	0.28403
	10.7152	1.03	1.19429e-08	1.53612e-07	6.67009e-05	0.0403811	0.0678947	0.124742	0.106156	0.106752	0.122322	0.234036	0.254478	0.290403
	10.9648	1.04	9.30607e-09	1.22468e-07	5.80662e-05	0.0402103	0.0677939	0.125688	0.10659	0.107687	0.123017	0.234652	0.257076	0.296961
	11.2202	1.05	7.23329e-09	9.73943e-08	5.04231e-05	0.0400029	0.067655	0.126525	0.106981	0.108553	0.123681	0.235102	0.25983	0.303707
	11.4815	1.06	5.60815e-09	7.72608e-08	4.36767e-05	0.0397586	0.0674767	0.127249	0.107332	0.109346	0.124317	0.235396	0.262731	0.310646
	11.749	1.07	4.33728e-09	6.11364e-08	3.77385e-05	0.0394769	0.0672578	0.12786	0.107639	0.110069	0.124921	0.235539	0.265768	0.31778
	12.0226	1.08	3.34603e-09	4.82563e-08	3.25262e-05	0.039159	0.066997	0.128354	0.107901	0.110721	0.125495	0.235537	0.268929	0.325113
	12.3027	1.09	2.57488e-09	3.79947e-08	2.79638e-05	0.0388062	0.0666937	0.12873	0.108115	0.111303	0.126038	0.235398	0.272202	0.332648
	12.5893	1.1	1.9765e-09	2.98405e-08	2.39813e-05	0.0384181	0.0663498	0.128987	0.108281	0.111815	0.126549	0.235132	0.275574	0.340389
	12.8825	1.11	1.5134e-09	2.33777e-08	2.05147e-05	0.0379955	0.0659629	0.129124	0.108397	0.112259	0.127026	0.234746	0.279034	0.348338
	13.1826	1.12	1.1559e-09	1.8269e-08	1.75054e-05	0.0375393	0.065534	0.129141	0.108463	0.112633	0.127473	0.234251	0.282567	0.356498
	13.4896	1.13	8.80654e-10	1.4241e-08	1.49002e-05	0.0370496	0.0650634	0.129038	0.108479	0.112941	0.127887	0.233656	0.286162	0.364872
	13.8038	1.14	6.69273e-10	1.10734e-08	1.2651e-05	0.0365294	0.0645515	0.128816	0.108443	0.113182	0.128269	0.232971	0.289806	0.373462
	14.1254	1.15	5.07359e-10	8.58882e-09	1.07145e-05	0.0359789	0.0640001	0.128477	0.108356	0.113357	0.128619	0.232206	0.293488	0.382271
	14.4544	1.16	3.83656e-10	6.64511e-09	9.05184e-06	0.0353993	0.0634083	0.12802	0.108217	0.113469	0.128935	0.231371	0.297196	0.3913
	14.7911	1.17	2.89389e-10	5.12843e-09	7.62805e-06	0.0347922	0.0627782	0.127449	0.108028	0.113517	0.129218	0.230475	0.300921	0.400553
	15.1356	1.18	2.1774e-10	3.94804e-09	6.41217e-06	0.0341588	0.062111	0.126766	0.107789	0.113503	0.12947	0.229529	0.304652	0.410031
	15.4882	1.19	1.63421e-10	3.03175e-09	5.37664e-06	0.0335001	0.0614088	0.125974	0.107498	0.113429	0.129688	0.228543	0.308383	0.419737
	15.8489	1.2	1.22346e-10	2.3223e-09	4.49708e-06	0.0328192	0.0606714	0.125075	0.107157	0.113296	0.129873	0.227525	0.312106	0.429675
	16.2181	1.21	9.13667e-11	1.77443e-09	3.75202e-06	0.0321169	0.0599014	0.124072	0.106764	0.113104	0.130026	0.226482	0.315816	0.439847
	16.5959	1.22	6.80613e-11	1.35242e-09	3.12258e-06	0.0313948	0.0591011	0.122968	0.106323	0.112854	0.130145	0.225421	0.319509	0.450257
	16.9824	1.23	5.05739e-11	1.02821e-09	2.59225e-06	0.0306537	0.0582698	0.121767	0.105834	0.112547	0.13023	0.224353	0.323184	0.460908
	17.378	1.24	3.74858e-11	7.79764e-10	2.14661e-06	0.0298974	0.0574118	0.120474	0.105297	0.112185	0.13028	0.223281	0.326838	0.471806
	17.7828	1.25	2.77154e-11	5.89875e-10	1.77315e-06	0.0291258	0.0565286	0.119091	0.104711	0.111767	0.130293	0.22221	0.330474	0.482956
	18.197	1.26	2.04405e-11	4.45114e-10	1.461e-06	0.0283422	0.0556213	0.117624	0.104078	0.111296	0.13027	0.221146	0.334093	0.494363
	18.6209	1.27	1.50374e-11	3.3504e-10	1.2008e-06	0.0275476	0.0546909	0.116076	0.103397	0.11077	0.130207	0.22009	0.3377	0.506033
	19.0546	1.28	1.1035e-11	2.51557e-10	9.84473e-07	0.0267429	0.05374	0.11445	0.10267	0.110191	0.130106	0.219047	0.341301	0.517973
	19.4984	1.29	8.07762e-12	1.88404e-10	8.05104e-07	0.025931	0.0527711	0.112752	0.101897	0.109559	0.129962	0.218017	0.344902	0.530191
	19.9526	1.3	5.89807e-12	1.40753e-10	6.56772e-07	0.0251144	0.051785	0.110986	0.101077	0.108873	0.129774	0.216999	0.348512	0.542693
	20.4174	1.31	4.29586e-12	1.04892e-10	5.34431e-07	0.0242938	0.0507828	0.109157	0.10021	0.108135	0.12954	0.215993	0.35214	0.555489
	20.893	1.32	3.12108e-12	7.79717e-11	4.33793e-07	0.0234695	0.0497676	0.107268	0.0992959	0.107344	0.129256	0.214997	0.355796	0.568587
	21.3796	1.33	2.2619e-12	5.7816e-11	3.51227e-07	0.0226459	0.0487402	0.105324	0.0983362	0.106501	0.128921	0.214008	0.359491	0.581993
	21.8776	1.34	1.63515e-12	4.27635e-11	2.83666e-07	0.0218244	0.0477009	0.103329	0.0973302	0.105604	0.128532	0.213021	0.363237	0.595717
	22.3872	1.35	1.17911e-12	3.1551e-11	2.28529e-07	0.0210058	0.0466539	0.101288	0.0962776	0.104654	0.128083	0.21203	0.367044	0.609766
	22.9087	1.36	8.48137e-13	2.32202e-11	1.83649e-07	0.0201917	0.0455977	0.0992046	0.0951791	0.103652	0.127575	0.211033	0.370924	0.624145
	23.4423	1.37	6.08544e-13	1.70465e-11	1.47215e-07	0.0193837	0.0445354	0.0970836	0.0940336	0.102595	0.127004	0.210018	0.374888	0.63886
	23.9883	1.38	4.35544e-13	1.24829e-11	1.17714e-07	0.0185834	0.0434696	0.0949286	0.0928397	0.101485	0.126364	0.208982	0.378945	0.653915
	24.5471	1.39	3.10947e-13	9.11829e-12	9.389e-08	0.0177921	0.0423984	0.0927438	0.0915994	0.100321	0.125653	0.207916	0.383105	0.669311
	25.1189	1.4	2.2144e-13	6.64392e-12	7.47007e-08	0.0170097	0.0413262	0.0905329	0.0903115	0.0991029	0.124868	0.206808	0.387374	0.685048
	25.704	1.41	1.57303e-13	4.82891e-12	5.92849e-08	0.016241	0.0402524	0.0882999	0.0889759	0.0978304	0.124005	0.205651	0.391759	0.701121
	26.3027	1.42	1.11464e-13	3.50097e-12	4.69329e-08	0.0154853	0.0391774	0.0860474	0.0875927	0.0965035	0.123062	0.204438	0.396264	0.717524
	26.9153	1.43	7.87857e-14	2.53187e-12	3.70617e-08	0.014744	0.0381034	0.0837814	0.0861621	0.0951225	0.122034	0.203156	0.400888	0.734246
	27.5423	1.44	5.55486e-14	1.82646e-12	2.91936e-08	0.0140179	0.0370311	0.0815032	0.0846844	0.0936874	0.120919	0.201797	0.405632	0.751271
	28.1838	1.45	3.90673e-14	1.31429e-12	2.29385e-08	0.0133083	0.0359622	0.0792184	0.0831593	0.0921988	0.119715	0.200349	0.41049	0.76858
	28.8403	1.46	2.74074e-14	9.43384e-13	1.79786e-08	0.0126161	0.0348969	0.0769281	0.0815885	0.0906572	0.11842	0.198805	0.415455	0.786148
	29.5121	1.47	1.91794e-14	6.75459e-13	1.4056e-08	0.011942	0.0338362	0.0746379	0.0799703	0.0890633	0.117032	0.197154	0.420517	0.803944
	30.1995	1.48	1.33881e-14	4.82418e-13	1.09617e-08	0.0112869	0.0327796	0.0723498	0.0783127	0.0874181	0.11555	0.195388	0.425662	0.821932
	30.903	1.49	9.32215e-15	3.43687e-13	8.52733e-09	0.0106515	0.0317311	0.0700669	0.0766127	0.0857229	0.113973	0.193501	0.430873	0.840069
	31.6228	1.5	6.47482e-15	2.4424e-13	6.617e-09	0.0100364	0.0306899	0.0677914	0.0748719	0.083979	0.112301	0.191483	0.436128	0.858307
	32.3594	1.51	4.48594e-15	1.73135e-13	5.12181e-09	0.00944195	0.0296562	0.0655281	0.0730923	0.0821881	0.110533	0.189328	0.441403	0.87659
	33.1131	1.52	3.10022e-15	1.22424e-13	3.95457e-09	0.00886871	0.0286316	0.0632789	0.0712752	0.0803522	0.108671	0.187032	0.446671	0.894856
	33.8844	1.53	2.13721e-15	8.635e-14	3.04572e-09	0.00831621	0.0276179	0.0610446	0.0694251	0.0784735	0.106715	0.184586	0.451901	0.913037
	34.6737	1.54	1.46966e-15	6.07537e-14	2.33989e-09	0.0077863	0.0266148	0.0588322	0.0675426	0.0765545	0.104668	0.18199	0.457058	0.931058
	35.4813	1.55	1.00809e-15	4.26381e-14	1.79314e-09	0.00727821	0.0256234	0.056642	0.065632	0.0745979	0.102534	0.17924	0.462106	0.948838
	36.3078	1.56	6.89756e-16	2.98495e-14	1.37072e-09	0.00679202	0.0246445	0.0544765	0.0636963	0.0726048	0.100314	0.176337	0.467005	0.966292
	37.1535	1.57	4.70768e-16	2.08444e-14	1.04519e-09	0.00632769	0.0236789	0.0523382	0.0617399	0.0705827	0.0980119	0.173277	0.471714	0.983326
	38.0189	1.58	3.20503e-16	1.45197e-14	7.94982e-10	0.00588513	0.0227274	0.0502275	0.0597644	0.0685317	0.0956319	0.170065	0.47619	0.999845
	38.9045	1.59	2.17657e-16	1.00888e-14	6.03161e-10	0.00546416	0.0217909	0.048151	0.0577758	0.0664576	0.0931818	0.166702	0.480387	1.01575
	39.8107	1.6	1.47444e-16	6.99254e-15	4.56482e-10	0.00506454	0.0208701	0.0461086	0.055776	0.064362	0.0906636	0.163192	0.484262	1.03093
	40.738	1.61	9.96309e-17	4.83443e-15	3.44611e-10	0.00468595	0.0199652	0.0441023	0.0537701	0.0622514	0.0880835	0.159539	0.487766	1.04529
	41.6869	1.62	6.71547e-17	3.33403e-15	2.59506e-10	0.00432801	0.0190777	0.0421341	0.0517633	0.0601278	0.08545	0.155749	0.490856	1.05872
	42.658	1.63	4.51516e-17	2.29355e-15	1.94931e-10	0.0039903	0.0182085	0.0402061	0.049758	0.0579976	0.0827686	0.15183	0.493486	1.07111
	43.6516	1.64	3.0282e-17	1.57385e-15	1.46059e-10	0.00367233	0.0173588	0.0383199	0.0477603	0.0558641	0.0800473	0.14779	0.495612	1.08235
	44.6684	1.65	2.02586e-17	1.07728e-15	1.09167e-10	0.00337267	0.016527	0.0364773	0.0457736	0.0537308	0.0772914	0.143641	0.497192	1.09235
	45.7088	1.66	1.35192e-17	7.35548e-16	8.13891e-11	0.00309269	0.0157169	0.0346797	0.0438013	0.0516024	0.0745106	0.139393	0.498187	1.10099
	46.7735	1.67	8.99919e-18	5.00965e-16	6.0528e-11	0.00283071	0.0149267	0.0329287	0.0418494	0.0494868	0.0717115	0.135057	0.498561	1.10819
	47.863	1.68	5.97546e-18	3.40343e-16	4.49015e-11	0.00258522	0.0141586	0.0312245	0.0399212	0.047386	0.0689009	0.130642	0.498279	1.11385
	48.9779	1.69	3.9578e-18	2.30644e-16	3.32261e-11	0.00235744	0.0134108	0.0295695	0.0380205	0.0453034	0.0660892	0.126161	0.497313	1.1179
	50.1187	1.7	2.61487e-18	1.55912e-16	2.45252e-11	0.00214401	0.0126867	0.0279647	0.0361513	0.0432457	0.0632828	0.121632	0.495637	1.12025
	51.2861	1.71	1.7233e-18	1.05132e-16	1.80576e-11	0.00194698	0.0119851	0.0264119	0.0343171	0.0412158	0.0604885	0.117063	0.493231	1.12083
	52.4807	1.72	1.13289e-18	7.07132e-17	1.32624e-11	0.00176455	0.0113064	0.0249106	0.0325206	0.0392178	0.0577163	0.11247	0.49008	1.1196
	53.7032	1.73	7.42893e-19	4.74441e-17	9.71624e-12	0.00159615	0.0106509	0.0234588	0.0307653	0.0372557	0.0549723	0.107866	0.486172	1.11651
	54.9541	1.74	4.85937e-19	3.17525e-17	7.10049e-12	0.0014409	0.010018	0.0220618	0.0290567	0.0353321	0.0522625	0.103269	0.481505	1.11152
	56.2341	1.75	3.17065e-19	2.11977e-17	5.17598e-12	0.00129903	0.00940964	0.0207169	0.0273927	0.0334496	0.0495953	0.0986889	0.476077	1.10462
	57.544	1.76	2.06362e-19	1.4116e-17	3.76367e-12	0.00116878	0.00882422	0.0194252	0.0257817	0.031616	0.0469778	0.0941381	0.469897	1.0958
	58.8844	1.77	1.33976e-19	9.37671e-18	2.72988e-12	0.00104946	0.00826332	0.0181878	0.0242215	0.0298326	0.0444141	0.089634	0.462975	1.08505
	60.256	1.78	8.67636e-20	6.21303e-18	1.97511e-12	0.000940414	0.00772532	0.0170031	0.0227161	0.0280988	0.0419117	0.0851856	0.45533	1.07241
	61.6595	1.79	5.60483e-20	4.10649e-18	1.42545e-12	0.000840974	0.00721178	0.0158719	0.021266	0.0264215	0.0394746	0.0808007	0.446986	1.05791
	63.0957	1.8	3.61162e-20	2.7074e-18	1.02619e-12	0.000750504	0.00672089	0.0147928	0.0198722	0.0248002	0.0371076	0.0764986	0.437969	1.04159
	64.5654	1.81	2.32143e-20	1.78052e-18	7.36917e-13	0.000668384	0.00625259	0.013764	0.018535	0.0232355	0.0348146	0.0722819	0.428314	1.0235
	66.0693	1.82	1.48841e-20	1.16804e-18	5.27865e-13	0.000594014	0.00580819	0.0127851	0.0172567	0.0217314	0.0325973	0.0681714	0.418059	1.00373
	67.6083	1.83	9.51931e-21	7.64331e-19	3.77174e-13	0.000526817	0.00538711	0.0118586	0.0160358	0.0202876	0.0304629	0.0641689	0.407245	0.982358
	69.1831	1.84	6.07298e-21	4.98907e-19	2.68828e-13	0.000465426	0.00498745	0.010979	0.0148733	0.0189039	0.0284086	0.0602824	0.395919	0.959474
	70.7946	1.85	3.86467e-21	3.24842e-19	1.91127e-13	0.000411096	0.00460957	0.0101497	0.0137683	0.017583	0.0264418	0.0565177	0.384129	0.935184
	72.4436	1.86	2.45322e-21	2.10979e-19	1.35545e-13	0.000361567	0.00425297	0.00936701	0.0127219	0.0163226	0.0245595	0.0528838	0.371929	0.909602
	74.131	1.87	1.55338e-21	1.36685e-19	9.58867e-14	0.00031805	0.00391564	0.00862799	0.0117328	0.0151253	0.0227669	0.0493829	0.359371	0.88285
	75.8578	1.88	9.81138e-22	8.83316e-20	6.76625e-14	0.000279168	0.00360015	0.00793539	0.0107996	0.0139861	0.0210631	0.0460208	0.346511	0.855056
	77.6247	1.89	6.18155e-22	5.69411e-20	4.76269e-14	0.000244508	0.00330423	0.00728556	0.00992138	0.0129102	0.0194466	0.0428006	0.333408	0.826354
	79.4328	1.9	3.8849e-22	3.66142e-20	3.34403e-14	0.000213687	0.00302777	0.0066762	0.00909678	0.0118951	0.017916	0.0397216	0.320117	0.79688
	81.2831	1.91	2.43543e-22	2.34849e-20	2.34209e-14	0.000185486	0.00276934	0.00610672	0.0083244	0.0109387	0.0164726	0.036789	0.306697	0.766774
	83.1764	1.92	1.52295e-22	1.50259e-20	1.63625e-14	0.000160658	0.00252757	0.00557576	0.00760162	0.0100375	0.0151109	0.0340071	0.293205	0.736179
	85.1138	1.93	9.49972e-23	9.58975e-21	1.14028e-14	0.000138767	0.00230331	0.00508169	0.00692886	0.0091937	0.0138336	0.0313675	0.279696	0.705234
	87.0964	1.94	5.91085e-23	6.10504e-21	7.9266e-15	0.000120319	0.00209498	0.00462102	0.00630387	0.00840325	0.0126395	0.0288757	0.266225	0.674079
	89.1251	1.95	3.66862e-23	3.87689e-21	5.49638e-15	0.000103261	0.00190186	0.0041961	0.00572289	0.00766651	0.011524	0.0265235	0.252844	0.64285
	91.2011	1.96	2.27128e-23	2.4558e-21	3.80172e-15	8.91666e-05	0.00172323	0.00380194	0.00518487	0.00698029	0.0104845	0.0243106	0.239603	0.611682
	93.3254	1.97	1.40266e-23	1.55173e-21	2.623e-15	7.68201e-05	0.00155835	0.00343831	0.00468885	0.00634384	0.00951637	0.0222384	0.22655	0.5807
	95.4993	1.98	8.64069e-24	9.78036e-22	1.80522e-15	6.60314e-05	0.00140649	0.00310535	0.00423164	0.00575285	0.00862109	0.0202998	0.213727	0.550027
	97.7237	1.99	5.30956e-24	6.14904e-22	1.2393e-15	5.66275e-05	0.00126551	0.00279917	0.00381023	0.00520731	0.00779223	0.0184926	0.201175	0.519778
	100	2	3.25449e-24	3.85633e-22	8.4867e-16	4.7583e-05	0.00113714	0.00251727	0.00342469	0.00470392	0.00702876	0.0168104	0.188933	0.490058
Source Data
	duration (min)	log10(duration)	0	0.2	0.3	0.5	1	2	3	5	6	10	50	200		* # of encounters observed for each duration bin
	0.01	-2	0	0	0	0	0	0	0	0	0	0	0	0
	0.0125893	-1.9	0	0	0	0	0	0	0	0	0	0	0	0
	0.0158489	-1.8	0	0	0	0	0	0	0	0	0	0	0	0
	0.0199526	-1.7	0	0	0	0	0	0	0	0	0	0	0	0
	0.0251189	-1.6	0	0	0	0	0	0	0	0	0	0	0	0
	0.0316228	-1.5	0	0	0	0	0	0	0	0	0	0	0	0
	0.0398107	-1.4	0	0	1	0	0	0	1	0	0	0	0	0
	0.0501187	-1.3	0	0	0	0	0	1	2	0	0	2	0	0
	0.0630957	-1.2	1	0	3	0	2	1	0	0	0	0	1	0
	0.0794328	-1.1	1	0	2	2	1	3	2	0	3	1	0	0
	0.1	-1	17	5	9	11	6	7	3	7	9	4	1	0
	0.125893	-0.9	42	15	31	34	37	8	10	24	16	7	0	0
	0.158489	-0.8	93	46	67	64	66	32	38	46	50	6	1	1
	0.199526	-0.7	171	143	176	116	129	68	84	83	63	21	1	0
	0.251189	-0.6	164	114	149	123	122	89	118	60	78	24	3	1
	0.316228	-0.5	120	100	118	107	120	91	82	63	73	39	6	0
	0.398107	-0.4	59	39	57	105	116	80	67	63	56	54	3	0
	0.501187	-0.3	42	15	36	69	80	59	61	62	68	56	3	0
	0.630957	-0.2	18	15	17	41	52	44	41	46	39	42	5	0
	0.794328	-0.1	7	9	13	21	31	30	22	37	30	24	1	1
	1	0	8	1	4	10	17	20	19	17	6	17	1	0
	1.25893	0.1	0	3	2	7	9	12	11	13	9	5	2	0
	1.58489	0.2	0	0	0	0	12	7	7	4	7	10	1	0
	1.99526	0.3	0	0	0	3	7	1	7	5	3	0	3	1
	2.51189	0.4	0	0	0	3	8	5	5	2	3	3	0	1
	3.16228	0.5	0	0	1	5	5	2	6	2	5	3	1	1
	3.98107	0.6	0	0	0	2	9	2	2	0	2	4	3	1
	5.01187	0.7	0	0	0	1	4	4	8	0	5	5	3	0
	6.30957	0.8	0	0	0	1	5	2	5	6	10	6	1	1
	7.94328	0.9	0	0	0	7	4	9	7	7	4	12	1	1
	10	1	0	0	0	1	8	9	6	5	7	11	1	2
	12.5893	1.1	0	0	0	5	7	10	10	11	10	13	1	0
	15.8489	1.2	0	0	0	2	5	11	6	4	8	7	3	2
	19.9526	1.3	0	0	0	2	6	5	7	10	6	10	3	2
	25.1189	1.4	0	0	0	1	4	7	5	3	8	6	2	3
	31.6228	1.5	0	0	0	0	2	3	9	8	9	8	2	4
	39.8107	1.6	0	0	0	0	2	3	3	5	9	16	4	4
	50.1187	1.7	0	0	0	0	0	1	1	1	2	3	3	1
	63.0957	1.8	0	0	0	0	0	0	0	0	0	0	9	19
	79.4328	1.9	0	0	0	0	0	0	0	0	0	0	0	0
	100	2	0	0	0	0	0	0	0	0	0	0	0	0
