# Supplementary material for: Accept–reject decision-making revealed via a quantitative and ethological study of C. elegans foraging
Source: eLife. 2025 Sep 10;13:RP103191. doi: 10.7554/eLife.103191 (PMC12422737; doi:10.7554/eLife.103191)
Supplement: Figure 2—source data 8. [file elife-103191-fig2-data8.xlsx]

## Sheet: Sheet1
Figure 2 - Source Data 8
Figure 2I - Encounter classification as sense or no response using semi-supervised Quadratic Discriminant Analysis (QDA)
Summary Statistics
	label	OD600	growth time (hr)	# worms	# encounters
	0	0	1	30	743
	0.2	0.05	1	23	505
	0.3	0.1	1	25	686
	0.5	0.5	1	35	743
	1	1	1	46	876
	2	2	1	44	626
	3	3	1	48	655
	5	4	1	44	594
	6	5	1	50	598
	10	10	1	50	419
	50	1	12	20	69
	200	1	48	28	46
Quadratic Discriminant (y = a + b*x1 + c*x2 + d*x3 + e*x1^2 + f*x2^2 + g*x3^2 + h*x1*x2 + i*x1*x3 + j*x2*x3)
	a	b	c	d	e	f	g	h	i	j		* x1 = min. velocity on patch (μm/s); x2 = max. Δ velocity (μm/s^2); x3 = Δ velocity (μm/s^2)
	1.58529	-0.0244455	-0.0305764	-0.215627	-0.000398978	0.000312493	0.013751	0.0001833	0.000495287	0.00299524
Source Data
	label	worm #	encounter #	min. velocity on patch (μm/s)	Δ velocity (μm/s^2)	max. Δ velocity (μm/s^2)	p(exploit)	p(explore)	p(sense)	p(non-sense)	labeled sense (QDA)	labeled no response (QDA)		* posterior probability of classification as explore or exploit as estimated by the Gaussian Mixture Model described in methods, Figure 2H, and Figure 2 - supplement 6
	2	1	1	181.114	-7.56184	35.3088	2.24858e-07	1	4.06486e-05	0.999959	FALSE	FALSE		* posterior probability of classification as sense or no response as estimated by semi-supervised quadratic discriminant analysis (QDA) described in methods, Figure 2 - supplement 8, and Video 5
	2	1	2	146.669	0.715483	41.3154	2.16147e-05	0.999978	3.68495e-05	0.999963	FALSE	FALSE		* RGB value calculation: p(exploit)*[0 114 178] + p(explore)*p(sense)*[0 158 115] + p(explore)*p(no response)*[230 159 0]
	2	1	3	116.711	-12.0407	180.524	6.87314e-05	0.999931	0.311496	0.688504	FALSE	FALSE		* semi-supervied QDA uses labeled data to generate a better discriminator
	2	1	4	181.838	-5.53162	60.2226	2.8324e-06	0.999997	4.40513e-07	1	FALSE	FALSE		data labeled no response and sense are indicated
	2	1	5	207.623	-3.03123	50.0906	8.90611e-07	0.999999	3.3415e-09	1	FALSE	FALSE		data labeled sense were included probabilistically (e.g. if p(exploit) = 0.9, the encounter would be labeled sense for 90% of replicates); labels here represent one replicate (of 1000)
	2	1	6	158.123	-2.33039	36.2119	1.40321e-05	0.999986	7.79761e-06	0.999992	FALSE	FALSE
	2	1	7	30.45	-8.91788	179.889	0.00415996	0.99584	0.984693	0.0153074	FALSE	FALSE
	2	1	8	99.729	-7.68303	84.6787	3.41164e-05	0.999966	0.0298547	0.970145	FALSE	FALSE
	2	1	9	145.02	-13.2669	100.164	8.29837e-06	0.999992	0.000697245	0.999303	FALSE	FALSE
	2	1	10	68.1656	-5.65189	106.634	0.000367562	0.999632	0.343492	0.656508	FALSE	FALSE
	2	1	11	123.093	-9.51895	72.1553	0.000140799	0.999859	0.00314321	0.996857	FALSE	FALSE
	2	1	12	17.8268	-7.52181	196.848	0.0147129	0.985287	0.99651	0.00348963	FALSE	FALSE
	2	1	13	13.2354	-7.86726	181.442	0.999987	1.33821e-05	0.989971	0.0100291	TRUE	FALSE
	2	2	1	78.4292	25.7591	36.9097	3.65703e-06	0.999996	0.676256	0.323744	FALSE	FALSE
	2	2	2	162.138	-7.70536	95.8304	8.9285e-07	0.999999	2.9479e-05	0.999971	FALSE	FALSE
	2	2	3	167.537	-6.10492	83.6518	9.23109e-06	0.999991	8.14158e-06	0.999992	FALSE	FALSE
	2	2	4	58.5642	-25.3017	237.749	0.000458122	0.999542	0.999282	0.000717745	FALSE	FALSE
	2	2	5	42.175	-23.7644	185.016	0.00298312	0.997017	0.996085	0.00391525	FALSE	FALSE
	2	2	6	7.58301	0		1	8.93794e-08	0.784536	0.215464	TRUE	FALSE
	2	3	1	63.4601	-0.843808	105.733	0.0126655	0.987335	0.868639	0.131361	FALSE	FALSE
	2	3	2	114.699	-6.45891	181.986	0.000113478	0.999887	0.555364	0.444636	FALSE	FALSE
	2	3	3	68.4217	-16.3062	166.863	0.000258979	0.999741	0.900819	0.0991814	FALSE	FALSE
	2	3	4	10.823	-8.03954	175.042	0.999996	3.86692e-06	0.985341	0.0146588	TRUE	FALSE
	2	4	1	89.7515	12.1184	16.1045	2.40965e-05	0.999976	0.0310852	0.968915	FALSE	FALSE
	2	4	2	79.7142	-5.16313	94.2181	0.0001898	0.99981	0.140663	0.859337	FALSE	FALSE
	2	4	3	121.326	-6.48265	132.086	4.2949e-05	0.999957	0.0202071	0.979793	FALSE	FALSE
	2	4	4	67.4898	-22.7929	227.71	0.000747337	0.999253	0.99734	0.00265972	FALSE	FALSE
	2	4	5	20.018	-15.5683	148.403	0.0155265	0.984474	0.968945	0.0310548	FALSE	FALSE
	2	4	6	158.121	-2.98575	49.2961	8.63683e-06	0.999991	1.03051e-05	0.99999	FALSE	FALSE
	2	4	7	148.846	-16.9817	141.419	2.7774e-05	0.999972	0.00266018	0.99734	FALSE	FALSE
	2	4	8	54.4339	-11.247	181.506	0.000241977	0.999758	0.966928	0.033072	FALSE	FALSE
	2	4	9	30.55	-18.2436	150.043	0.589089	0.410911	0.977887	0.0221128	TRUE	FALSE
	2	4	10	137.339	1.9609	10.7991	2.87604e-05	0.999971	7.5399e-05	0.999925	FALSE	FALSE
	2	4	11	28.993	-17.6167	200.944	0.233457	0.766543	0.994999	0.00500095	TRUE	FALSE
	2	4	12	14.5366	-17.1075	171.423	0.999947	5.26893e-05	0.987258	0.0127421	TRUE	FALSE
	2	4	13	12.283	-13.518	132.808	0.99999	1.02007e-05	0.949926	0.050074	TRUE	FALSE
	6	5	1	186.268	-3.46962	105.191	2.95427e-06	0.999997	1.40209e-06	0.999999	FALSE	FALSE
	6	5	2	110.137	-9.42754	125.641	9.34085e-05	0.999907	0.0420427	0.957957	FALSE	FALSE
	6	5	3	3.58783	-3.91476	131.422	1	6.97155e-08	0.921627	0.0783727	TRUE	FALSE
	6	6	1	228.691	-3.3062	79.4222	9.06988e-07	0.999999	2.07197e-10	1	FALSE	FALSE
	6	6	2	157.206	-3.89107	114.441	2.19589e-06	0.999998	0.000148279	0.999852	FALSE	FALSE
	6	6	3	193.217	-10.6239	119.874	9.80162e-07	0.999999	8.73586e-07	0.999999	FALSE	FALSE
	6	6	4	35.5995	-9.01872	141.163	0.00686985	0.99313	0.893996	0.106004	FALSE	FALSE
	6	6	5	39.4339	-15.7061	176.042	0.00535144	0.994649	0.977366	0.0226339	FALSE	FALSE
	6	6	6	143.537	-10.3004	83.2405	5.06729e-06	0.999995	0.00035118	0.999649	FALSE	FALSE
	6	6	7	131.931	-26.7881	181.505	4.50511e-06	0.999995	0.470094	0.529906	FALSE	FALSE
	6	6	8	9.95656	-5.05689	143.037	1	3.90606e-07	0.94448	0.0555203	TRUE	FALSE
	6	7	1	38.5295	-8.05299	145.318	0.000472202	0.999528	0.900477	0.0995233	FALSE	FALSE
	6	7	2	7.24143	-6.45248	201.246	1	5.6335e-08	0.997991	0.00200856	TRUE	FALSE
	6	7	3	14.7078	-23.9829	292.276	0.978136	0.0218641	0.999991	9.2032e-06	TRUE	FALSE
	6	8	1	122.503	-9.10097	104.196	1.60516e-05	0.999984	0.00581503	0.994185	FALSE	FALSE
	6	8	2	119.154	-0.279732	87.7133	1.74049e-05	0.999983	0.00457447	0.995426	FALSE	FALSE
	6	8	3	43.5384	-30.1646	218.701	0.00599247	0.994008	0.99977	0.000230331	FALSE	FALSE
	6	8	4	101.29	18.1197	4.8592	2.65325e-06	0.999997	0.0371575	0.962842	FALSE	FALSE
	6	8	5	8.10548	-25.259	242.289	0.999984	1.62191e-05	0.999785	0.000214952	TRUE	FALSE
	6	8	6	0.613216	-6.97278	160.426	1	2.92904e-07	0.971938	0.0280622	TRUE	FALSE
	10	9	1	112.973	7.80061	8.09456	4.86368e-05	0.999951	0.00143146	0.998569	FALSE	FALSE
	10	9	2	150.203	-7.59935	65.3549	1.93497e-05	0.999981	6.96296e-05	0.99993	FALSE	FALSE
	10	9	3	209.288	-8.01647	70.3073	2.57776e-07	1	6.69857e-09	1	FALSE	FALSE
	10	9	4	65.6867	-19.8259	172.337	7.28341e-05	0.999927	0.958742	0.0412584	FALSE	FALSE
	10	9	5	26.0698	-11.4345	164.945	0.0248665	0.975133	0.967398	0.0326017	FALSE	FALSE
	10	9	6	19.8594	-7.07066	149.088	0.426891	0.573109	0.945708	0.0542916	TRUE	FALSE
	10	9	7	10.799	-5.29426	175.566	1	3.37235e-08	0.990057	0.00994313	TRUE	FALSE
	10	10	1	69.7674	-34.3415	232.722	0.0014498	0.99855	0.999901	9.90322e-05	FALSE	FALSE
	10	10	2	30.3917	-22.3254	234.771	0.0135739	0.986426	0.999424	0.00057552	FALSE	FALSE
	10	10	3	131.835	22.0751	92.2726	4.48303e-07	1	0.951694	0.0483056	FALSE	FALSE
	10	10	4	8.33415	-32.0671	253.66	1	9.28781e-09	0.999976	2.36799e-05	TRUE	FALSE
	10	11	1	203.394	-1.28161	31.7042	3.13832e-07	1	9.23127e-07	0.999999	FALSE	FALSE
	10	11	2	154.201	-3.11799	48.5473	5.1274e-06	0.999995	1.78698e-05	0.999982	FALSE	FALSE
	10	11	3	48.9723	-9.20435	167.012	0.00194178	0.998058	0.945951	0.0540494	FALSE	FALSE
	10	11	4	14.4108	-18.0041	222.508	0.999994	6.24851e-06	0.998665	0.00133453	TRUE	FALSE
	10	11	5	10.1994	-27.7459	255.442	0.999967	3.32731e-05	0.999929	7.10638e-05	TRUE	FALSE
	10	11	6	13.0721	-14.7592	160.542	0.999737	0.000262729	0.976173	0.0238275	TRUE	FALSE
	10	12	1	72.8774	-13.587	178.548	0.000153434	0.999847	0.90756	0.0924403	FALSE	FALSE
	10	12	2	43.3255	-25.1526	200.401	0.000906364	0.999094	0.998124	0.001876	FALSE	FALSE
	10	12	3	41.449	-25.7075	209.25	0.00719679	0.992803	0.998833	0.00116729	FALSE	FALSE
	10	12	4	112.257	-5.61087	68.3656	0.000212822	0.999787	0.00533616	0.994664	FALSE	FALSE
	10	12	5	10.1497	-18.5611	229.252	1	1.08631e-07	0.999123	0.000877476	TRUE	FALSE
	10	12	6	15.471	-23.2435	326.106	0.995014	0.00498574	1	3.52971e-07	TRUE	FALSE
	0	13	1	175.138	4.86803	44.7506	2.13716e-05	0.999979	9.29155e-07	0.999999	FALSE	TRUE
	0	13	2	138.929	-14.699	159.666	0.000361133	0.999639	0.0139019	0.986098	FALSE	TRUE
	0	13	3	157.123	5.74034	46.1815	1.91424e-05	0.999981	1.56515e-05	0.999984	FALSE	TRUE
	0	13	4	98.6702	-13.4482	126.544	8.72728e-05	0.999913	0.160387	0.839613	FALSE	TRUE
	0	13	5	91.8731	-2.72139	134.809	5.74119e-05	0.999943	0.32411	0.67589	FALSE	TRUE
	0	13	6	113.15	2.19957	144.996	0.000111972	0.999888	0.383574	0.616426	FALSE	TRUE
	0	13	7	114.355	-14.5589	160.402	3.83654e-05	0.999962	0.155093	0.844907	FALSE	TRUE
	0	13	8	168.943	-11.3208	82.1808	4.62009e-06	0.999995	1.21269e-05	0.999988	FALSE	TRUE
	0	13	9	193.782	-4.00088	52.9957	2.77647e-06	0.999997	4.43742e-08	1	FALSE	TRUE
	0	13	10	121.721	12.1394	110.028	0.000249728	0.99975	0.428877	0.571123	FALSE	TRUE
	0	13	11	187.699	9.55557	14.0861	3.89162e-07	1	7.12595e-08	1	FALSE	TRUE
	0	13	12	122.334	-8.50841	122.188	2.74754e-06	0.999997	0.0109206	0.989079	FALSE	TRUE
	0	13	13	99.8084	-19.6738	159.532	1.58068e-06	0.999998	0.588067	0.411933	FALSE	TRUE
	0	13	14	185.239	-2.42509	63.9461	4.11253e-06	0.999996	2.44826e-07	1	FALSE	TRUE
	0	13	15	235.24	6.27386	6.3934	6.74102e-07	0.999999	4.57092e-12	1	FALSE	TRUE
	0	13	16	181.207	-8.94479	70.8643	1.29358e-06	0.999999	9.55199e-07	0.999999	FALSE	TRUE
	0	13	17	184.498	3.24985	20.7221	1.03622e-06	0.999999	7.84082e-08	1	FALSE	TRUE
	0	13	18	132.248	2.77592	65.6986	3.04711e-05	0.99997	0.000576773	0.999423	FALSE	TRUE
	0	13	19	71.5422	-19.3771	131.101	7.23314e-05	0.999928	0.872324	0.127676	FALSE	TRUE
	0	13	20	109.723	0.759896	30.5468	0.0019046	0.998095	0.00253902	0.997461	FALSE	TRUE
	0	14	1	241.89	-2.74299	40.2225	4.90943e-07	1	2.86789e-12	1	FALSE	TRUE
	0	14	2	88.4234	-1.32849	152.51	2.01394e-05	0.99998	0.736333	0.263667	FALSE	TRUE
	0	14	3	195.039	17.4397	21.6895	3.01494e-07	1	3.51512e-07	1	FALSE	TRUE
	0	14	4	196.042	-2.97307	86.322	1.58862e-06	0.999998	1.07643e-07	1	FALSE	TRUE
	0	14	5	241.988	-4.81605	68.5929	4.27137e-07	1	8.53008e-12	1	FALSE	TRUE
	0	14	6	206.212	-10.9203	111.251	6.2864e-07	0.999999	6.75671e-08	1	FALSE	TRUE
	0	14	7	203.287	8.20163	24.6256	2.06725e-07	1	6.00431e-09	1	FALSE	TRUE
	0	14	8	121.066	-0.673537	91.6214	5.61784e-05	0.999944	0.00431716	0.995683	FALSE	TRUE
	0	14	9	133.784	-7.12117	190.804	2.15877e-05	0.999978	0.286327	0.713673	FALSE	TRUE
	0	14	10	204.814	3.62648	74.4699	7.57511e-07	0.999999	2.97438e-08	1	FALSE	TRUE
	0	14	11	163.335	1.62668	17.6503	1.12402e-05	0.999989	2.1238e-06	0.999998	FALSE	TRUE
	0	14	12	128.621	3.27108	79.3478	4.93658e-05	0.999951	0.0017972	0.998203	FALSE	TRUE
	0	14	13	140.901	-6.2201	94.2821	3.7361e-05	0.999963	0.000423128	0.999577	FALSE	TRUE
	0	14	14	196.431	-3.91066	68.3036	2.59521e-06	0.999997	4.53231e-08	1	FALSE	TRUE
	0	14	15	156.663	0.273522	54.272	8.16728e-06	0.999992	1.35463e-05	0.999986	FALSE	TRUE
	0	14	16	150.736	-4.09937	72.0073	1.24722e-05	0.999988	5.37073e-05	0.999946	FALSE	TRUE
	0	14	17	216.812	1.00427	23.6955	2.79766e-06	0.999997	2.52253e-10	1	FALSE	TRUE
	0	14	18	165.481	-2.40006	53.1871	1.08669e-05	0.999989	3.73817e-06	0.999996	FALSE	TRUE
	0.2	15	1	114.494	-1.43366	77.5868	0.000355066	0.999645	0.00456978	0.99543	FALSE	FALSE
	0.2	15	2	86.2576	0.708922	103.441	0.000166171	0.999834	0.171998	0.828002	FALSE	FALSE
	0.2	15	3	172.296	-9.57923	82.2536	1.99996e-06	0.999998	5.42897e-06	0.999995	FALSE	FALSE
	0.2	15	4	133.19	3.90208	11.6834	1.58266e-05	0.999984	0.000121473	0.999879	FALSE	FALSE
	0.2	15	5	145.36	1.48454	65.0324	1.19973e-05	0.999988	9.84219e-05	0.999902	FALSE	FALSE
	0.2	15	6	103.992	-2.98009	82.8692	0.000771712	0.999228	0.014655	0.985345	FALSE	FALSE
	0.2	15	7	150.046	0.444339	54.2545	6.52858e-06	0.999993	3.3635e-05	0.999966	FALSE	FALSE
	0.2	15	8	20.8627	-3.06575	143.716	0.000159827	0.99984	0.950271	0.0497292	FALSE	FALSE
	0.2	15	9	143.211	-3.68736	39.4276	1.42344e-05	0.999986	7.49927e-05	0.999925	FALSE	FALSE
	0.2	15	10	255.385	-0.429073	25.2523	1.03059e-07	1	8.79497e-14	1	FALSE	FALSE
	0.2	15	11	208.111	0.811424	44.8559	8.90191e-07	0.999999	2.55092e-09	1	FALSE	FALSE
	0.2	16	1	128.717	0.472715	48.2229	1.15774e-05	0.999988	0.000416995	0.999583	FALSE	FALSE
	0.2	16	2	118.934	-4.52614	84.5302	8.1782e-06	0.999992	0.0035772	0.996423	FALSE	FALSE
	0.2	16	3	102.642	-2.87392	83.7683	6.56849e-05	0.999934	0.0170629	0.982937	FALSE	FALSE
	0.2	16	4	158.421	12.9516	9.53902	2.16583e-06	0.999998	1.13462e-05	0.999989	FALSE	FALSE
	0.2	16	5	107.614	-9.38221	124.559	1.11914e-05	0.999989	0.0503995	0.9496	FALSE	FALSE
	0.2	16	6	112.924	3.81982	122.773	8.73659e-06	0.999991	0.145547	0.854453	FALSE	FALSE
	0.2	16	7	141.423	13.833	39.9727	1.28451e-06	0.999999	0.000699336	0.999301	FALSE	FALSE
	0.2	16	8	138.614	-4.25555	109.522	5.25132e-06	0.999995	0.00110331	0.998897	FALSE	FALSE
	0.2	16	9	99.6203	3.45372	48.9378	8.78918e-06	0.999991	0.0102733	0.989727	FALSE	FALSE
	0.2	17	1	225.405	-4.15147	65.1381	2.6411e-07	1	2.04253e-10	1	FALSE	FALSE
	0.2	17	2	190.336	-0.161715	26.3805	1.47625e-06	0.999999	3.44707e-08	1	FALSE	FALSE
	0.2	17	3	227.52	0.669507	20.382	5.77904e-07	0.999999	2.8104e-11	1	FALSE	FALSE
	0.2	17	4	136.201	-18.7334	144.222	1.83473e-05	0.999982	0.0189671	0.981033	FALSE	FALSE
	0.2	17	5	136.291	0.423253	83.29	1.02144e-06	0.999999	0.000604649	0.999395	FALSE	FALSE
	0.2	17	6	153.067	0.00295015	19.1305	4.91443e-06	0.999995	1.07739e-05	0.999989	FALSE	FALSE
	5	18	1	107.349	17.5647	27.3888	4.23325e-06	0.999996	0.218254	0.781746	FALSE	FALSE
	5	18	2	153.726	-8.28632	131.408	3.32996e-06	0.999997	0.000460998	0.999539	FALSE	FALSE
	5	18	3	65.4697	-19.5799	238.624	3.3482e-05	0.999967	0.998499	0.00150079	FALSE	FALSE
	5	18	4	108.665	-24.5763	214.929	7.96062e-06	0.999992	0.943921	0.0560789	FALSE	FALSE
	5	18	5	59.6021	-38.3984	256.549	0.000439808	0.99956	0.999995	5.27885e-06	FALSE	FALSE
	5	18	6	22.9163	-25.6862	216.502	0.0488501	0.95115	0.999399	0.000601461	FALSE	FALSE
	5	18	7	187.799	-3.82867	52.7158	2.39758e-06	0.999998	1.19596e-07	1	FALSE	FALSE
	5	18	8	125.029	-1.73455	101.936	2.47873e-05	0.999975	0.00422167	0.995778	FALSE	FALSE
	5	18	9	24.022	-18.5216	245.162	0.0193303	0.98067	0.999672	0.000327641	FALSE	FALSE
	5	18	10	145.941	-2.82102	118.343	5.74023e-06	0.999994	0.000873253	0.999127	FALSE	FALSE
	5	18	11	148.284	-0.267227	71.8679	7.81271e-06	0.999992	7.78259e-05	0.999922	FALSE	FALSE
	5	18	12	146.523	-12.898	125.526	1.74859e-05	0.999983	0.00108862	0.998911	FALSE	FALSE
	5	18	13	107.21	-4.61269	49.488	2.50137e-05	0.999975	0.00644377	0.993556	FALSE	FALSE
	5	18	14	111.157	-4.38358	97.0228	4.41521e-05	0.999956	0.0119425	0.988058	FALSE	FALSE
	5	19	1	27.4585	-7.87827	241.506	0.0208315	0.979169	0.999919	8.1335e-05	FALSE	FALSE
	5	19	2	60.7166	-16.0348	198.151	0.000234552	0.999765	0.982716	0.0172839	FALSE	FALSE
	5	19	3	10.7069	-28.5556	192.342	0.999907	9.30254e-05	0.999697	0.000302649	TRUE	FALSE
	5	19	4	47.6025	-23.5549	170.143	0.0219792	0.978021	0.993276	0.00672443	FALSE	FALSE
	5	19	5	149.764	5.2445	216.422	2.918e-06	0.999997	0.997457	0.00254259	FALSE	FALSE
	5	19	6	187.277	-9.06879	80.597	2.10084e-06	0.999998	4.57326e-07	1	FALSE	FALSE
	5	19	7	5.82785	-11.1834	240.062	0.999612	0.000387759	0.999778	0.000222127	TRUE	FALSE
	5	20	1	25.605	-11.4436	237.666	0.0087689	0.991231	0.999718	0.000281699	FALSE	FALSE
	5	20	2	26.4201	-7.32879	287.018	0.00112099	0.998879	1	3.24681e-07	FALSE	FALSE
	5	20	3	8.27071	-5.77561	245.274	1	1.99228e-07	0.999971	2.85217e-05	TRUE	FALSE
	5	21	1	28.1268	-17.7729	180.666	0.017999	0.982001	0.989013	0.0109869	FALSE	FALSE
	5	21	2	20.7457	-6.67239	194.453	0.553178	0.446822	0.996361	0.00363913	FALSE	FALSE
	5	21	3	8.74245	-26.5951	211.179	0.999999	5.94688e-07	0.999539	0.00046091	TRUE	FALSE
	3	22	1	101.693	-13.6173	103.095	0.000249807	0.99975	0.0878202	0.91218	FALSE	FALSE
	3	22	2	127.56	-15.9976	128.221	1.92603e-05	0.999981	0.01806	0.98194	FALSE	FALSE
	3	22	3	166.379	-17.453	145.422	2.15576e-06	0.999998	0.000329464	0.999671	FALSE	FALSE
	3	22	4	49.0976	-13.1218	175.118	0.000421453	0.999579	0.961698	0.0383024	FALSE	FALSE
	3	22	5	123.725	-8.80721	96.3653	2.15274e-05	0.999978	0.0039822	0.996018	FALSE	FALSE
	3	22	6	65.0179	-13.0411	171.3	0.000211795	0.999788	0.910704	0.0892963	FALSE	FALSE
	3	22	7	17.7109	-30.3473	249.859	0.999992	8.38372e-06	0.999952	4.83296e-05	TRUE	FALSE
	3	22	8	45.5232	-13.0893	299.232	0.00105162	0.998948	0.999999	7.33567e-07	FALSE	FALSE
	3	22	9	14.0197	-26.1532	220.126	0.999134	0.000865992	0.999574	0.00042591	TRUE	FALSE
	3	23	1	149.525	-16.4627	144.483	4.78599e-06	0.999995	0.00249344	0.997507	FALSE	FALSE
	3	23	2	154.793	-16.5868	116.991	1.75823e-06	0.999998	0.000573353	0.999427	FALSE	FALSE
	3	23	3	181.865	-9.45669	106.401	4.57897e-06	0.999995	2.70058e-06	0.999997	FALSE	FALSE
	3	23	4	73.2104	-10.4261	191.032	3.0504e-05	0.999969	0.96018	0.0398202	FALSE	FALSE
	3	23	5	51.6173	-14.364	225.291	0.00132706	0.998673	0.998052	0.00194844	FALSE	FALSE
	3	23	6	27.8348	-20.871	214.83	0.0544025	0.945598	0.9982	0.00180029	FALSE	FALSE
	3	23	7	137.794	5.98686	132.192	1.95565e-06	0.999998	0.0678651	0.932135	FALSE	FALSE
	3	23	8	133.472	0.0642842	99.7895	1.08159e-05	0.999989	0.0018819	0.998118	FALSE	FALSE
	3	23	9	4.8619	-5.5053	152.14	0.999986	1.35065e-05	0.962879	0.0371214	TRUE	FALSE
	3	23	10	27.9042	-24.891	189.716	0.0148393	0.985161	0.998354	0.00164574	FALSE	FALSE
	3	23	11	20.1088	-22.3159	166.162	0.562114	0.437886	0.995607	0.00439343	TRUE	FALSE
	3	23	12	109.486	-28.3554	185.412	6.42459e-06	0.999994	0.943012	0.0569877	FALSE	FALSE
	3	23	13	11.6074	-31.0855	209.87	0.919371	0.0806287	0.99991	9.02951e-05	FALSE	FALSE
	3	23	14	13.7156	-26.3672	197.108	0.999833	0.000166906	0.999314	0.000685863	TRUE	FALSE
	3	23	15	21.5234	-16.7074	135.378	0.438571	0.561429	0.97024	0.0297605	FALSE	FALSE
	3	24	1	68.029	-9.56977	87.059	0.000118786	0.999881	0.34817	0.65183	FALSE	FALSE
	3	24	2	76.6629	-17.5557	199.576	0.000376753	0.999623	0.967007	0.0329927	FALSE	FALSE
	3	24	3	93.5299	-21.0192	150.922	3.23444e-05	0.999968	0.737201	0.262799	FALSE	FALSE
	3	24	4	86.2344	-16.5139	131.037	4.60896e-05	0.999954	0.51617	0.48383	FALSE	FALSE
	3	24	5	128.22	-11.4539	84.3211	5.51462e-06	0.999994	0.00293111	0.997069	FALSE	FALSE
	3	24	6	146.538	-7.60521	62.8564	7.49819e-06	0.999993	0.000110345	0.99989	FALSE	FALSE
	3	24	7	3.91688	-15.3126	221.421	0.999955	4.54621e-05	0.998549	0.00145146	TRUE	FALSE
	3	25	1	185.468	7.20015	28.3345	9.60804e-07	0.999999	1.25358e-07	1	FALSE	FALSE
	3	25	2	210.048	-3.67537	34.1184	2.69682e-06	0.999997	1.53018e-09	1	FALSE	FALSE
	3	25	3	201.08	-7.50358	66.8335	1.9675e-06	0.999998	2.50158e-08	1	FALSE	FALSE
	3	25	4	128.063	-10.9337	124.103	6.90723e-06	0.999993	0.00729363	0.992706	FALSE	FALSE
	3	25	5	145.901	1.81563	72.0661	1.40578e-05	0.999986	0.000129626	0.99987	FALSE	FALSE
	3	25	6	175.665	-4.11533	51.9326	6.65535e-06	0.999993	8.55485e-07	0.999999	FALSE	FALSE
	3	25	7	165.57	-10.9553	87.2729	9.31601e-06	0.999991	2.06297e-05	0.999979	FALSE	FALSE
	3	25	8	190.185	-8.03379	63.8801	2.45854e-06	0.999998	1.64505e-07	1	FALSE	FALSE
	3	25	9	116.987	-21.1485	150.083	2.02282e-06	0.999998	0.251876	0.748124	FALSE	FALSE
	3	25	10	49.3413	-6.85206	165.453	0.000184825	0.999815	0.950715	0.0492848	FALSE	FALSE
	3	25	11	13.6909	-47.1114	322.502	0.999918	8.15667e-05	1	3.47802e-09	TRUE	FALSE
	3	25	12	108.634	-17.9424	195.768	1.68014e-05	0.999983	0.714901	0.285099	FALSE	FALSE
	3	25	13	16.3724	-34.4704	232.036	0.997954	0.00204626	0.999984	1.60505e-05	TRUE	FALSE
	5	26	1	57.9567	-7.87348	129.332	0.00443492	0.995565	0.678951	0.321049	FALSE	FALSE
	5	26	2	129.662	-9.93323	106.216	1.47103e-05	0.999985	0.0030508	0.996949	FALSE	FALSE
	5	26	3	64.8544	-0.318099	121.857	0.00156566	0.998434	0.652106	0.347894	FALSE	FALSE
	5	26	4	193.541	-8.92563	72.1341	3.52459e-06	0.999996	1.27473e-07	1	FALSE	FALSE
	5	26	5	100.376	-7.77078	90.7339	0.000100896	0.999899	0.0318976	0.968102	FALSE	FALSE
	5	26	6	39.1992	-9.81376	82.8632	0.0119913	0.988009	0.738001	0.261999	FALSE	FALSE
	5	26	7	107.131	-6.1659	61.5622	7.83221e-05	0.999922	0.00889287	0.991107	FALSE	FALSE
	5	26	8	60.2217	0.37966	47.9849	0.00104706	0.998953	0.172818	0.827182	FALSE	FALSE
	5	26	9	52.5843	4.02479	54.2694	0.0938452	0.906155	0.287952	0.712048	FALSE	FALSE
	5	26	10	93.9935	-1.46246	24.4251	0.000221183	0.999779	0.0146695	0.985331	FALSE	FALSE
	5	26	11	79.7078	-13.0343	118.122	0.000177837	0.999822	0.400538	0.599462	FALSE	FALSE
	5	26	12	112.334	-9.0899	98.6866	0.000124949	0.999875	0.0142883	0.985712	FALSE	FALSE
	5	26	13	132.157	-0.106275	26.7162	1.22719e-05	0.999988	0.000192974	0.999807	FALSE	FALSE
	5	26	14	90.7602	-11.1308	93.6945	4.12879e-05	0.999959	0.11888	0.88112	FALSE	FALSE
	5	26	15	140.599	-5.48791	70.2067	8.11774e-06	0.999992	0.000208689	0.999791	FALSE	FALSE
	5	26	16	113.003	-7.09879	108.133	1.85457e-05	0.999981	0.0154067	0.984593	FALSE	FALSE
	5	26	17	192.657	-3.68797	54.1077	2.90711e-06	0.999997	5.42777e-08	1	FALSE	FALSE
	5	27	1	84.6607	-13.7156	128.513	1.38653e-05	0.999986	0.566751	0.433249	FALSE	FALSE
	5	27	2	36.3797	-15.875	178.113	0.0149274	0.985073	0.98123	0.0187696	FALSE	FALSE
	5	27	3	28.5093	-2.05	216.217	0.0109618	0.989038	0.999854	0.000145513	FALSE	FALSE
	5	27	4	42.6388	-30.9556	212.204	0.0224335	0.977567	0.999813	0.000187408	FALSE	FALSE
	5	27	5	25.5027	-2.08659	107.933	0.0125499	0.98745	0.795108	0.204892	FALSE	FALSE
	5	27	6	159.662	-2.65332	86.0548	8.55261e-06	0.999991	2.72108e-05	0.999973	FALSE	FALSE
	5	27	7	164.004	-6.72253	60.377	1.00432e-06	0.999999	7.98496e-06	0.999992	FALSE	FALSE
	5	27	8	164.267	-5.29703	65.6012	5.3826e-06	0.999995	7.31343e-06	0.999993	FALSE	FALSE
	5	27	9	183.683	-9.01241	69.6639	4.54406e-06	0.999995	6.31973e-07	0.999999	FALSE	FALSE
	5	27	10	6.25951	-30.8063	206.488	0.999999	9.58778e-07	0.9999	0.00010023	TRUE	FALSE
	5	27	11	64.0277	-2.52811	48.7337	0.00362855	0.996371	0.16691	0.83309	FALSE	FALSE
	5	27	12	26.4399	-30.0957	208.754	0.0149902	0.98501	0.999823	0.000177008	FALSE	FALSE
	5	27	13	15.884	-18.0065	134.638	0.889824	0.110176	0.981555	0.0184452	TRUE	FALSE
	5	28	1	79.3439	-13.2965	102.229	1.76101e-05	0.999982	0.369359	0.630641	FALSE	FALSE
	5	28	2	14.2398	-6.955	147.529	0.996764	0.00323642	0.946562	0.0534377	TRUE	FALSE
	5	28	3	30.5426	6.14483	139.374	0.000393408	0.999607	0.992666	0.00733436	FALSE	FALSE
	5	28	4	110.767	-14.2376	122.809	5.22961e-05	0.999948	0.061398	0.938602	FALSE	FALSE
	5	28	5	72.2377	-13.6235	152.577	9.21235e-06	0.999991	0.758334	0.241666	FALSE	FALSE
	5	28	6	145.161	-8.16082	102.995	4.03228e-06	0.999996	0.000373207	0.999627	FALSE	FALSE
	5	28	7	106.109	-11.9823	113.636	0.000109015	0.999891	0.0531542	0.946846	FALSE	FALSE
	5	28	8	66.9396	-8.18745	137.829	0.000948622	0.999051	0.64797	0.35203	FALSE	FALSE
	5	28	9	77.9146	-8.18776	99.47	0.000595991	0.999404	0.207771	0.792229	FALSE	FALSE
	5	28	10	157.644	-0.595239	23.4424	1.41622e-05	0.999986	6.10508e-06	0.999994	FALSE	FALSE
	5	28	11	97.6669	-13.7631	182.715	0.000361727	0.999638	0.707491	0.292509	FALSE	FALSE
	5	28	12	131.476	-9.21302	80.8399	1.70324e-05	0.999983	0.0012494	0.998751	FALSE	FALSE
	3	29	1	79.5709	-17.2532	143.299	9.86201e-05	0.999901	0.72466	0.27534	FALSE	FALSE
	3	29	2	29.0362	-5.39246	149.858	0.810008	0.189992	0.944643	0.0553568	TRUE	FALSE
	3	29	3	38.374	-8.33602	155.265	0.0138518	0.986148	0.934354	0.0656464	FALSE	FALSE
	3	29	4	26.9284	-14.6822	110.807	0.00453007	0.99547	0.93672	0.0632796	FALSE	FALSE
	3	29	5	162.78	-1.39764	99.6378	1.11079e-05	0.999989	3.95185e-05	0.99996	FALSE	FALSE
	3	29	6	149.78	-11.1948	87.119	5.59551e-06	0.999994	0.000195145	0.999805	FALSE	FALSE
	3	29	7	133.726	-9.45598	71.698	2.43657e-05	0.999976	0.000879463	0.999121	FALSE	FALSE
	3	29	8	130.142	-6.9758	70.6157	5.27034e-05	0.999947	0.000891544	0.999108	FALSE	FALSE
	3	30	1	186.234	-7.61157	86.4191	1.98317e-06	0.999998	5.58486e-07	0.999999	FALSE	FALSE
	3	30	2	211.972	-10.1191	88.531	5.69162e-07	0.999999	9.26475e-09	1	FALSE	FALSE
	3	30	3	151.292	-2.20218	114.598	1.76191e-06	0.999998	0.000390804	0.999609	FALSE	FALSE
	3	30	4	141.254	-11.346	90.3869	3.59661e-06	0.999996	0.00064368	0.999356	FALSE	FALSE
	3	30	5	182.293	0.787691	87.4106	3.24093e-07	1	1.54949e-06	0.999998	FALSE	FALSE
	3	30	6	120.142	12.1522	179.508	1.63923e-05	0.999984	0.999694	0.000306262	FALSE	FALSE
	3	30	7	176.199	-3.13764	72.1525	5.16999e-06	0.999995	1.37409e-06	0.999999	FALSE	FALSE
	3	30	8	105.228	6.80857	93.8062	1.59644e-05	0.999984	0.0930669	0.906933	FALSE	FALSE
	3	30	9	90.6116	-6.47896	187.165	5.54216e-05	0.999945	0.922621	0.0773786	FALSE	FALSE
	3	30	10	86.0763	-18.0607	138.625	0.00012889	0.999871	0.643246	0.356754	FALSE	FALSE
	3	30	11	84.7273	-6.92461	104.611	8.67523e-05	0.999913	0.140388	0.859612	FALSE	FALSE
	3	30	12	107.16	-7.59629	60.031	2.06738e-05	0.999979	0.0111658	0.988834	FALSE	FALSE
	3	30	13	151.725	0.423026	28.0128	1.38181e-05	0.999986	1.42026e-05	0.999986	FALSE	FALSE
	3	30	14	130.669	-3.37842	61.4513	2.49911e-05	0.999975	0.000498508	0.999501	FALSE	FALSE
	3	30	15	54.0327	-3.70772	69.583	0.00247529	0.997525	0.329764	0.670236	FALSE	FALSE
	3	30	16	124.751	11.0366	114.302	1.01241e-06	0.999999	0.328181	0.671819	FALSE	FALSE
	3	30	17	61.2986	-16.2504	128.737	0.000810084	0.99919	0.839254	0.160746	FALSE	FALSE
	3	30	18	9.24397	-9.93287	145.786	0.99771	0.00229043	0.946441	0.0535589	TRUE	FALSE
	3	31	1	154.08	1.31173	43.6236	1.02426e-05	0.99999	1.44024e-05	0.999986	FALSE	FALSE
	3	31	2	143.229	9.02286	17.7732	1.01278e-05	0.99999	5.63054e-05	0.999944	FALSE	FALSE
	3	31	3	126.978	-19.1798	151.551	1.78522e-06	0.999998	0.0691861	0.930814	FALSE	FALSE
	3	31	4	55.7444	-5.85967	208.745	0.000816389	0.999184	0.998092	0.0019076	FALSE	FALSE
	3	31	5	155.311	-13.4123	152.196	2.37777e-06	0.999998	0.00123214	0.998768	FALSE	FALSE
	3	31	6	134.631	-5.62156	122.986	7.26379e-06	0.999993	0.00321956	0.99678	FALSE	FALSE
	3	31	7	174.887	-0.343518	76.1154	5.14513e-05	0.999949	2.25567e-06	0.999998	FALSE	FALSE
	3	31	8	93.6662	-0.748283	183.3	0.000249747	0.99975	0.972362	0.0276379	FALSE	FALSE
	3	31	9	145.382	-5.27794	42.6697	1.15137e-05	0.999988	7.23829e-05	0.999928	FALSE	FALSE
	3	31	10	8.63011	-24.514	199.353	0.99999	9.52137e-06	0.998877	0.00112314	TRUE	FALSE
	3	32	1	71.8825	0.929542	53.8066	0.000960756	0.999039	0.0935827	0.906417	FALSE	FALSE
	3	32	2	103.482	-0.0725378	54.3821	0.000379387	0.999621	0.00721933	0.992781	FALSE	FALSE
	3	32	3	91.4928	-1.12367	37.1595	0.000218263	0.999782	0.0181823	0.981818	FALSE	FALSE
	3	32	4	121.718	2.98681	39.822	3.56038e-05	0.999964	0.00080829	0.999192	FALSE	FALSE
	3	32	5	153.405	-5.97104	76.4416	8.58323e-05	0.999914	4.73082e-05	0.999953	FALSE	FALSE
	3	32	6	125.53	-7.95368	106.813	2.0815e-05	0.999979	0.00420391	0.995796	FALSE	FALSE
	3	32	7	28.6308	1.93954	119.027	0.00200673	0.997993	0.910789	0.0892113	FALSE	FALSE
	3	32	8	50.6168	-20.4785	240.546	0.0060882	0.993912	0.999253	0.000747123	FALSE	FALSE
	3	32	9	11.1478	-6.16147	120.437	0.999938	6.22764e-05	0.875821	0.124179	TRUE	FALSE
	3	32	10	55.5488	-9.09264	171.259	0.00220762	0.997792	0.945422	0.0545779	FALSE	FALSE
	3	32	11	24.2481	-5.31733	138.381	0.0824589	0.917541	0.916321	0.0836788	FALSE	FALSE
	3	32	12	43.3446	-10.3355	120.443	0.00797954	0.99202	0.790939	0.209061	FALSE	FALSE
	3	32	13	123.522	-1.70616	77.5351	2.89984e-05	0.999971	0.00174179	0.998258	FALSE	FALSE
	3	32	14	27.5685	-33.2693	230.152	0.500104	0.499896	0.999966	3.39055e-05	TRUE	FALSE
	6	33	1	20.1484	-12.9909	209.514	0.119844	0.880156	0.997144	0.00285594	FALSE	FALSE
	6	33	2	25.3737	-23.7415	168.344	0.0810908	0.918909	0.996983	0.00301733	FALSE	FALSE
	6	33	3	36.1118	-19.9871	153.958	0.0422582	0.957742	0.984165	0.0158345	FALSE	FALSE
	6	33	4	26.9062	-26.7021	227.859	0.160324	0.839676	0.999665	0.000334568	FALSE	FALSE
	6	33	5	71.597	4.68205	114.216	7.31067e-05	0.999927	0.717623	0.282377	FALSE	FALSE
	6	33	6	78.4393	-23.2449	181.813	0.000776196	0.999224	0.970064	0.0299359	FALSE	FALSE
	6	33	7	51.2723	-15.8781	235.035	0.000232799	0.999767	0.99897	0.00102971	FALSE	FALSE
	6	33	8	100.726	-21.7913	154.769	0.000115483	0.999885	0.673763	0.326237	FALSE	FALSE
	6	33	9	54.887	-25.0449	203.269	0.0028688	0.997131	0.997212	0.00278821	FALSE	FALSE
	6	33	10	36.6892	-22.344	169.503	0.00559519	0.994405	0.993438	0.00656179	FALSE	FALSE
	6	33	11	17.3382	-24.3998	195.916	0.182305	0.817695	0.998626	0.00137432	FALSE	FALSE
	6	33	12	12.4029	-16.0965	161.013	0.99651	0.00349026	0.980865	0.0191346	TRUE	FALSE
	6	33	13	15.3185	3.03439	189.373	0.999017	0.000982559	0.999747	0.000253019	TRUE	FALSE
	6	33	14	29.1097	-22.2933	151.111	0.0343793	0.965621	0.993859	0.00614095	FALSE	FALSE
	6	33	15	13.2943	-34.9907	242.688	0.999915	8.51588e-05	0.99999	1.03215e-05	TRUE	FALSE
	6	33	16	23.772	-5.00235	205.399	0.29077	0.70923	0.998956	0.00104432	FALSE	FALSE
	6	34	1	136.977	-6.96289	99.7688	1.16539e-05	0.999988	0.000850147	0.99915	FALSE	FALSE
	6	34	2	159.624	-8.86116	57.6907	2.93696e-06	0.999997	2.1234e-05	0.999979	FALSE	FALSE
	6	34	3	14.0971	-25.7906	245.997	0.999809	0.000190783	0.999835	0.000164846	TRUE	FALSE
	6	34	4	91.2492	-11.2227	160.534	5.04404e-05	0.99995	0.527666	0.472334	FALSE	FALSE
	6	34	5	51.728	-28.6939	209.723	0.00296847	0.997032	0.99934	0.000659793	FALSE	FALSE
	6	34	6	140.302	-7.35001	151.562	6.06463e-06	0.999994	0.00835902	0.991641	FALSE	FALSE
	6	34	7	60.5983	-11.3063	199.792	0.000144562	0.999855	0.986788	0.013212	FALSE	FALSE
	6	34	8	82.3325	-18.066	145.922	0.000102312	0.999898	0.733659	0.266341	FALSE	FALSE
	6	34	9	6.74076	-29.5381	255.613	1	1.48581e-07	0.999953	4.66174e-05	TRUE	FALSE
	6	35	1	93.6644	-5.43637	117.987	2.96947e-05	0.99997	0.11597	0.88403	FALSE	FALSE
	6	35	2	27.7411	-24.2442	164.782	0.0555898	0.94441	0.997257	0.00274314	FALSE	FALSE
	6	35	3	196.488	-3.66404	54.437	3.04617e-06	0.999997	2.83502e-08	1	FALSE	FALSE
	6	35	4	185.111	-20.3963	141.644	4.05231e-06	0.999996	3.46112e-05	0.999965	FALSE	FALSE
	6	35	5	163.527	-5.53871	100.262	4.71182e-06	0.999995	2.76433e-05	0.999972	FALSE	FALSE
	6	35	6	10.9048	-7.177	208.718	0.999996	3.55915e-06	0.998708	0.00129211	TRUE	FALSE
	6	35	7	114.382	9.40365	88.5226	0.000157909	0.999842	0.0679713	0.932029	FALSE	FALSE
	6	35	8	54.1937	-10.6849	201.249	0.00010849	0.999892	0.991311	0.00868852	FALSE	FALSE
	6	35	9	14.1011	-21.5213	199.453	0.999999	1.19336e-06	0.997557	0.00244344	TRUE	FALSE
	6	36	1	105.193	-3.15968	122.661	1.755e-05	0.999982	0.06967	0.93033	FALSE	FALSE
	6	36	2	184.469	-1.67614	41.2799	3.52879e-06	0.999996	1.38126e-07	1	FALSE	FALSE
	6	36	3	53.7378	-28.4683	273.426	0.000244125	0.999756	0.999956	4.42619e-05	FALSE	FALSE
	6	36	4	215.212	-4.15159	63.8109	6.31375e-07	0.999999	1.35409e-09	1	FALSE	FALSE
	6	36	5	204.827	0.379346	19.4589	1.63057e-06	0.999998	2.21982e-09	1	FALSE	FALSE
	6	36	6	183.262	-5.31779	101.9	1.98166e-06	0.999998	1.65373e-06	0.999998	FALSE	FALSE
	6	36	7	189.2	-4.81798	60.7549	1.26097e-06	0.999999	1.2571e-07	1	FALSE	FALSE
	6	36	8	204.243	-2.75359	59.4919	7.01649e-07	0.999999	8.2916e-09	1	FALSE	FALSE
	6	36	9	111.042	-3.00374	168.424	0.00302548	0.996975	0.546169	0.453831	FALSE	FALSE
	6	36	10	10.8891	-14.3931	194.098	1	2.66482e-07	0.993335	0.00666528	TRUE	FALSE
	0.5	37	1	134.978	-2.52805	69.4616	0.000125206	0.999875	0.00517765	0.994822	FALSE	FALSE
	0.5	37	2	91.0942	-6.25829	90.7879	0.000251785	0.999748	0.061065	0.938935	FALSE	FALSE
	0.5	37	3	124.184	-4.5907	75.7669	8.30175e-05	0.999917	0.00158434	0.998416	FALSE	FALSE
	0.5	37	4	154.883	3.43188	41.4052	2.10143e-05	0.999979	1.34584e-05	0.999987	FALSE	FALSE
	0.5	37	5	100.235	-4.66669	93.7427	0.00387483	0.996125	0.0290947	0.970905	FALSE	FALSE
	0.5	37	6	139.411	5.14252	159.433	6.37761e-07	0.999999	0.408808	0.591192	FALSE	FALSE
	0.5	37	7	91.8841	-5.82517	168.398	8.06578e-05	0.999919	0.738655	0.261345	FALSE	FALSE
	0.5	37	8	127.13	-10.6484	152.725	8.83443e-05	0.999912	0.0299154	0.970085	FALSE	FALSE
	0.5	37	9	19.8688	-12.9421	211.949	0.0910323	0.908968	0.99758	0.00241962	FALSE	FALSE
	0.5	37	10	47.7302	-17.7045	182.029	0.00563593	0.994364	0.981055	0.0189451	FALSE	FALSE
	0.5	37	11	152.533	-5.30088	64.8082	0.00010211	0.999898	3.77952e-05	0.999962	FALSE	FALSE
	0.5	37	12	192.861	-5.38084	60.234	1.70534e-06	0.999998	7.0023e-08	1	FALSE	FALSE
	0.5	37	13	147.215	3.29712	27.6467	1.99275e-05	0.99998	2.57076e-05	0.999974	FALSE	FALSE
	0.5	37	14	167.832	3.15272	23.182	3.58556e-06	0.999996	1.18532e-06	0.999999	FALSE	FALSE
	0.5	37	15	54.6869	-7.60494	175.422	0.000179375	0.999821	0.964412	0.0355879	FALSE	FALSE
	0.5	37	16	29.9244	-15.3906	200.53	0.0374493	0.962551	0.994145	0.00585489	FALSE	FALSE
	0.5	37	17	25.4101	-16.4592	130.092	0.171376	0.828624	0.963632	0.0363685	FALSE	FALSE
	0.5	37	18	197.9	-1.24201	84.0877	3.19379e-06	0.999997	8.05069e-08	1	FALSE	FALSE
	0.5	37	19	196.64	-5.71912	63.2509	2.90843e-06	0.999997	4.0967e-08	1	FALSE	FALSE
	0.5	37	20	171.653	3.98651	28.7356	8.7398e-06	0.999991	7.97264e-07	0.999999	FALSE	FALSE
	0.5	37	21	166.469	-5.01886	47.6666	3.06458e-06	0.999997	3.5972e-06	0.999996	FALSE	FALSE
	0.5	37	22	92.6559	-9.80343	124.592	0.000516454	0.999484	0.165127	0.834873	FALSE	FALSE
	0.5	38	1	168.791	-11.2037	77.4094	1.39033e-05	0.999986	0.000220767	0.999779	FALSE	FALSE
	0.5	38	2	102.3	-4.8175	132.619	0.00324509	0.996755	0.123155	0.876845	FALSE	FALSE
	0.5	38	3	168.302	1.72927	32.7601	2.16708e-05	0.999978	1.36569e-06	0.999999	FALSE	FALSE
	0.5	38	4	69.5713	-9.05684	139.157	0.000713441	0.999287	0.626741	0.373259	FALSE	FALSE
	0.5	38	5	99.9319	-8.51476	121.912	6.04591e-05	0.99994	0.083962	0.916038	FALSE	FALSE
	0.5	38	6	147.593	-11.8266	102.703	1.42679e-05	0.999986	0.000406042	0.999594	FALSE	FALSE
	0.5	38	7	178.945	-0.0586957	77.1273	1.43952e-06	0.999999	1.31647e-06	0.999999	FALSE	FALSE
	0.5	38	8	133.915	19.2462	142.545	4.56379e-07	1	0.999162	0.000837558	FALSE	FALSE
	0.5	38	9	187.58	-5.49041	67.1624	2.13468e-06	0.999998	2.07194e-07	1	FALSE	FALSE
	0.5	38	10	191.652	-0.229376	32.6426	2.78318e-06	0.999997	3.17034e-08	1	FALSE	FALSE
	0.5	38	11	150.954	11.9105	43.4413	1.8171e-06	0.999998	0.000134982	0.999865	FALSE	FALSE
	0.5	38	12	204.109	-0.809696	37.1973	2.28935e-06	0.999998	4.03742e-09	1	FALSE	FALSE
	0.5	38	13	168.883	-9.84941	83.5822	1.81066e-06	0.999998	9.73721e-06	0.99999	FALSE	FALSE
	0.5	38	14	165.829	-1.50397	62.2213	1.2222e-06	0.999999	4.59774e-06	0.999995	FALSE	FALSE
	0.5	38	15	18.3496	-15.5698	109.767	0.998299	0.00170072	0.961236	0.0387645	TRUE	FALSE
	0.5	38	16	176.837	1.98517	21.9111	5.89197e-06	0.999994	2.78571e-07	1	FALSE	FALSE
	0.5	38	17	225.742	4.54748	28.9954	5.56391e-07	0.999999	6.33989e-11	1	FALSE	FALSE
	0.5	38	18	225.25	0.822129	38.4065	3.69897e-07	1	7.80605e-11	1	FALSE	FALSE
	0.5	38	19	40.8216	-10.0571	183.257	0.00219673	0.997803	0.982376	0.0176241	FALSE	FALSE
	0.5	39	1	97.5121	2.7571	16.846	0.00014632	0.999854	0.349768	0.650232	FALSE	FALSE
	0.5	39	2	38.6918	-0.49377	171.399	0.0673109	0.932689	0.993595	0.00640547	FALSE	FALSE
	0.5	39	3	37.5979	-14.1009	165.661	0.00456508	0.995435	0.963379	0.0366205	FALSE	FALSE
	0.5	39	4	100.38	-3.04943	87.9049	3.38544e-05	0.999966	0.0238122	0.976188	FALSE	FALSE
	0.5	39	5	129.33	6.13014	23.8741	0.000503038	0.999497	0.000271955	0.999728	FALSE	FALSE
	0.5	39	6	161.592	-1.63866	29.9838	1.38901e-05	0.999986	4.04208e-06	0.999996	FALSE	FALSE
	0.5	39	7	75.1345	0.219858	90.8186	0.00153045	0.99847	0.192918	0.807082	FALSE	FALSE
	0.5	39	8	115.418	13.9683	145.217	4.43568e-06	0.999996	0.9946	0.00539963	FALSE	FALSE
	0.5	39	9	133.165	-0.0440648	46.7086	4.14214e-05	0.999959	0.000236144	0.999764	FALSE	FALSE
	0.5	39	10	121.79	2.9848	19.0687	0.000197093	0.999803	0.000539586	0.99946	FALSE	FALSE
	0.5	39	11	111.357	-2.22391	57.9093	0.00013644	0.999864	0.00373626	0.996264	FALSE	FALSE
	0.5	40	1	128.518	-1.52636	56.7121	0.000143022	0.999857	0.000533998	0.999466	FALSE	FALSE
	0.5	40	2	91.977	0.704993	74.5356	0.000186067	0.999814	0.0362496	0.96375	FALSE	FALSE
	0.5	40	3	114.918	2.67046	29.208	4.7767e-05	0.999952	0.00136359	0.998636	FALSE	FALSE
	0.5	40	4	85.6941	-7.57428	69.2949	7.77447e-05	0.999922	0.0801236	0.919876	FALSE	FALSE
	0.5	40	5	155.141	-2.18138	40.5579	1.16099e-05	0.999988	1.26264e-05	0.999987	FALSE	FALSE
	0.5	40	6	155.561	2.68801	21.8949	1.1074e-05	0.999989	7.03435e-06	0.999993	FALSE	FALSE
	0.5	40	7	54.1811	1.49927	155.881	0.000415679	0.999584	0.980401	0.019599	FALSE	FALSE
	0.5	40	8	36.4138	-22.7739	175.187	0.0103875	0.989612	0.994786	0.00521384	FALSE	FALSE
	0.5	40	9	31.7782	-0.26275	183.964	0.0504461	0.949554	0.998233	0.00176736	FALSE	FALSE
	0.5	40	10	45.5005	-15.0042	161.129	0.00469916	0.995301	0.949252	0.0507482	FALSE	FALSE
	0.5	40	11	104.312	-9.12277	148.263	0.000103351	0.999897	0.175618	0.824382	FALSE	FALSE
	0.5	40	12	54.94	-16.3129	143.657	0.000580036	0.99942	0.905068	0.0949319	FALSE	FALSE
	0.5	40	13	30.0293	-4.33087	127.892	0.845914	0.154086	0.865823	0.134177	TRUE	FALSE
	0.5	40	14	159.369	1.3135	30.1727	1.63754e-05	0.999984	4.84359e-06	0.999995	FALSE	FALSE
	0.5	40	15	128.524	1.30592	63.7684	6.91729e-06	0.999993	0.000710111	0.99929	FALSE	FALSE
	0.5	40	16	143.364	-0.169385	22.042	2.48461e-05	0.999975	4.32332e-05	0.999957	FALSE	FALSE
	0.5	40	17	174.954	-1.15413	19.289	7.24651e-06	0.999993	4.30508e-07	1	FALSE	FALSE
	0.5	40	18	162.235	-3.31989	51.134	2.63668e-05	0.999974	6.04969e-06	0.999994	FALSE	FALSE
	0	41	1	93.1667	11.8995	8.76465	0.000232321	0.999768	0.419184	0.580816	FALSE	TRUE
	0	41	2	112.34	-6.81768	58.222	7.0663e-05	0.999929	0.00561245	0.994388	FALSE	TRUE
	0	41	3	108.307	-5.09883	73.1175	2.88569e-05	0.999971	0.00825095	0.991749	FALSE	TRUE
	0	41	4	105.243	-1.75499	36.1092	0.00043087	0.999569	0.00513211	0.994868	FALSE	TRUE
	0	41	5	106.364	1.61423	87.9818	0.000191535	0.999808	0.0201097	0.97989	FALSE	TRUE
	0	41	6	84.9525	1.3046	174.453	0.0013554	0.998645	0.982025	0.0179747	FALSE	TRUE
	0	41	7	173.094	3.61213	70.4374	4.35888e-06	0.999996	3.7405e-06	0.999996	FALSE	TRUE
	0	41	8	84.0008	-2.19343	170.515	0.000322817	0.999677	0.927021	0.0729792	FALSE	TRUE
	0	41	9	106.506	-1.38363	132.009	1.65426e-05	0.999983	0.135511	0.864489	FALSE	TRUE
	0	41	10	167.079	4.6821	77.6837	6.72281e-06	0.999993	1.70681e-05	0.999983	FALSE	TRUE
	0	41	11	123.325	-7.68982	92.005	2.90866e-06	0.999997	0.003324	0.996676	FALSE	TRUE
	0	41	12	171.499	7.84939	11.153	7.00547e-06	0.999993	6.74195e-07	0.999999	FALSE	TRUE
	0	41	13	95.8108	-2.68474	118.007	0.00010649	0.999894	0.119016	0.880984	FALSE	TRUE
	0	41	14	103.551	-1.46368	62.3907	0.00053406	0.999466	0.00870795	0.991292	FALSE	TRUE
	0	41	15	155.611	-3.55737	75.9622	1.29073e-05	0.999987	3.11979e-05	0.999969	FALSE	TRUE
	0	41	16	124.324	-5.83666	67.5574	8.01947e-06	0.999992	0.00145096	0.998549	FALSE	TRUE
	0	41	17	140.764	-1.94442	23.2799	2.13791e-05	0.999979	7.46256e-05	0.999925	FALSE	TRUE
	0	41	18	167.682	-1.18854	58.5818	1.01781e-05	0.99999	3.10759e-06	0.999997	FALSE	TRUE
	0	41	19	146.026	4.47901	81.4166	8.83391e-06	0.999991	0.000333817	0.999666	FALSE	TRUE
	0	41	20	202.799	-1.8317	40.8992	1.96968e-06	0.999998	5.85569e-09	1	FALSE	TRUE
	0	41	21	161.598	-11.2459	86.3689	6.47307e-06	0.999994	3.78901e-05	0.999962	FALSE	TRUE
	0	41	22	89.2017	-6.6609	102.473	0.000829323	0.999171	0.0963357	0.903664	FALSE	TRUE
	0	41	23	130.688	1.8981	67.6341	1.99358e-05	0.99998	0.000678834	0.999321	FALSE	TRUE
	0	41	24	81.3213	-2.79956	79.7613	0.000345146	0.999655	0.0852442	0.914756	FALSE	TRUE
	0	41	25	150.094	-4.5811	62.3171	2.98388e-05	0.99997	4.68412e-05	0.999953	FALSE	TRUE
	0	42	1	73.3826	-2.79074	112.826	4.25811e-05	0.999957	0.343669	0.656331	FALSE	TRUE
	0	42	2	152.833	-10.3032	93.2045	2.55582e-05	0.999974	0.000127259	0.999873	FALSE	TRUE
	0	42	3	186.545	-2.10545	48.4676	4.35223e-06	0.999996	1.20122e-07	1	FALSE	TRUE
	0	42	4	119.248	-12.1071	103.269	3.39217e-06	0.999997	0.0120712	0.987929	FALSE	TRUE
	0	42	5	136.76	-17.5508	118.989	3.5631e-06	0.999996	0.00757779	0.992422	FALSE	TRUE
	0	42	6	103.073	-7.68781	165.281	4.26077e-05	0.999957	0.426674	0.573326	FALSE	TRUE
	0	42	7	175.184	2.02558	61.9985	5.1481e-05	0.999949	1.40738e-06	0.999999	FALSE	TRUE
	0	42	8	166.022	5.93751	37.9912	3.80107e-06	0.999996	3.18692e-06	0.999997	FALSE	TRUE
	0	42	9	191.146	-0.332007	48.0976	1.60666e-06	0.999998	5.40481e-08	1	FALSE	TRUE
	0	42	10	217.29	1.13879	37.2747	1.32882e-06	0.999999	3.53468e-10	1	FALSE	TRUE
	0	42	11	124.833	4.35671	61.4647	5.75972e-05	0.999942	0.00138174	0.998618	FALSE	TRUE
	0	42	12	132.625	-2.9437	48.3775	8.43154e-06	0.999992	0.000299705	0.9997	FALSE	TRUE
	0	42	13	165.891	-5.33274	53.4648	1.06583e-06	0.999999	4.47597e-06	0.999996	FALSE	TRUE
	0	43	1	118.869	-3.52666	75.5358	6.20535e-06	0.999994	0.00269721	0.997303	FALSE	TRUE
	0	43	2	170.314	1.19478	33.7023	4.65191e-06	0.999995	1.02452e-06	0.999999	FALSE	TRUE
	0	43	3	155.699	2.62701	112.616	2.06007e-05	0.999979	0.000530015	0.99947	FALSE	TRUE
	0	43	4	172.179	-6.67881	105.845	9.55488e-06	0.99999	1.03348e-05	0.99999	FALSE	TRUE
	0	43	5	205.613	-0.713234	47.2726	4.00925e-06	0.999996	4.20573e-09	1	FALSE	TRUE
	0	43	6	164.597	-2.11787	46.5519	3.28722e-05	0.999967	3.58488e-06	0.999996	FALSE	TRUE
	0	43	7	132.953	2.93862	113.66	0.000644727	0.999355	0.00895349	0.991047	FALSE	TRUE
	0	43	8	117.97	-7.33256	122.115	0.00129445	0.998706	0.0167186	0.983281	FALSE	TRUE
	0	43	9	175.626	2.02278	58.0223	3.8002e-06	0.999996	1.09919e-06	0.999999	FALSE	TRUE
	0	43	10	125.808	2.34786	54.0408	0.000499123	0.999501	0.000744015	0.999256	FALSE	TRUE
	0	43	11	105.597	5.67203	31.965	0.000112706	0.999887	0.00438447	0.995616	FALSE	TRUE
	0	43	12	117.147	-7.3838	89.5083	1.58964e-05	0.999984	0.00587545	0.994125	FALSE	TRUE
	0	43	13	126.987	4.96195	41.8358	2.34371e-05	0.999977	0.000547961	0.999452	FALSE	TRUE
	0	43	14	132.444	1.5261	31.3679	3.4492e-05	0.999966	0.000185058	0.999815	FALSE	TRUE
	0	43	15	82.7117	7.23102	64.3299	0.000217756	0.999782	0.117608	0.882392	FALSE	TRUE
	0	43	16	179.882	2.41304	28.3851	1.93989e-06	0.999998	2.00539e-07	1	FALSE	TRUE
	0	43	17	169.527	0.0507957	37.7817	4.70864e-06	0.999995	1.28946e-06	0.999999	FALSE	TRUE
	0	43	18	186.647	-1.96466	32.3066	2.35226e-06	0.999998	8.10621e-08	1	FALSE	TRUE
	0	43	19	167.677	-4.17246	39.0598	5.91502e-06	0.999994	2.39125e-06	0.999998	FALSE	TRUE
	0	44	1	102.726	1.82735	129.532	2.13449e-05	0.999979	0.27674	0.72326	FALSE	TRUE
	0	44	2	105.161	6.67602	121.939	0.000186741	0.999813	0.457672	0.542328	FALSE	TRUE
	0	44	3	212.536	-3.11858	39.7445	3.174e-07	1	1.02432e-09	1	FALSE	TRUE
	0	44	4	186.936	2.49539	73.4854	3.10786e-05	0.999969	4.38299e-07	1	FALSE	TRUE
	0	44	5	118.379	12.9119	17.0975	1.4949e-05	0.999985	0.00239141	0.997609	FALSE	TRUE
	0	44	6	186.94	-6.83339	58.3748	1.45437e-06	0.999999	2.13609e-07	1	FALSE	TRUE
	0	44	7	152.181	-9.0941	86.0981	2.16802e-06	0.999998	9.88648e-05	0.999901	FALSE	TRUE
	0	44	8	195.281	1.92027	24.1153	6.21853e-06	0.999994	1.33108e-08	1	FALSE	TRUE
	0	44	9	176.261	0.535335	44.68	8.54566e-06	0.999991	5.51414e-07	0.999999	FALSE	TRUE
	0	44	10	184.022	0.0712154	27.2703	4.32458e-06	0.999996	1.00927e-07	1	FALSE	TRUE
	0	44	11	175.934	0.103618	44.4505	4.58041e-06	0.999995	5.72924e-07	0.999999	FALSE	TRUE
	0	44	12	154.015	-3.71463	65.3856	2.27441e-05	0.999977	2.80589e-05	0.999972	FALSE	TRUE
	0	44	13	171.4	-5.67878	43.7657	6.51582e-06	0.999993	1.76198e-06	0.999998	FALSE	TRUE
	0	44	14	167.94	-5.96798	77.0585	1.34842e-05	0.999987	6.15295e-06	0.999994	FALSE	TRUE
	0	44	15	137.446	-3.40328	58.3605	5.96975e-05	0.99994	0.000204416	0.999796	FALSE	TRUE
	0	44	16	159.599	3.66966	63.8022	5.37166e-06	0.999995	1.8348e-05	0.999982	FALSE	TRUE
	0	44	17	168.394	-4.20786	75.4708	5.41042e-06	0.999995	5.05907e-06	0.999995	FALSE	TRUE
	0	44	18	171.747	8.18949	72.9099	1.85935e-06	0.999998	1.64815e-05	0.999984	FALSE	TRUE
	0	44	19	164.186	3.70008	46.2839	5.38492e-06	0.999995	4.40771e-06	0.999996	FALSE	TRUE
	10	45	1	35.1468	0.834842	24.2044	0.00729673	0.992703	0.886013	0.113987	FALSE	FALSE
	10	45	2	21.7237	-34.2479	232.971	0.420501	0.579499	0.999981	1.88733e-05	FALSE	FALSE
	10	45	3	9.67137	-24.5249	195.628	1	7.71322e-08	0.998779	0.00122068	TRUE	FALSE
	10	45	4	15.1567	-37.8335	265.491	0.935578	0.0644225	0.999998	1.7773e-06	TRUE	FALSE
	10	45	5	17.6894	-30.9928	207.581	0.967213	0.0327869	0.999896	0.000104175	TRUE	FALSE
	10	45	6	27.8464	-37.4749	299.003	0.0138863	0.986114	0.999999	6.60707e-07	FALSE	FALSE
	10	45	7	24.2856	-34.4726	229.782	0.80321	0.19679	0.999981	1.87044e-05	TRUE	FALSE
	10	46	1	30.4408	-25.502	191.041	0.0266719	0.973328	0.998594	0.00140562	FALSE	FALSE
	10	46	2	13.8156	-29.05	228.05	0.999872	0.000127565	0.999857	0.000142728	TRUE	FALSE
	10	46	3	34.3779	-30.6272	230.297	0.209383	0.790617	0.99989	0.000110381	FALSE	FALSE
	10	46	4	14.5951	-26.7425	196.363	0.997617	0.00238277	0.999385	0.000615416	TRUE	FALSE
	10	46	5	102.032	-2.93959	155.069	4.60728e-05	0.999954	0.462401	0.537599	FALSE	FALSE
	10	46	6	30.5409	-21.9576	171.737	0.00338479	0.996615	0.994124	0.00587621	FALSE	FALSE
	10	46	7	9.75324	-1.28106	212.659	0.999972	2.83035e-05	0.999849	0.000151381	TRUE	FALSE
	10	47	1	121.716	-3.31068	81.4468	4.09839e-05	0.999959	0.00236693	0.997633	FALSE	FALSE
	10	47	2	7.14378	-22.7476	196.857	0.999996	4.32825e-06	0.998104	0.00189602	TRUE	FALSE
	10	47	3	90.686	3.85097	142.998	0.000454158	0.999546	0.842624	0.157376	FALSE	FALSE
	10	47	4	8.97455	-4.84904	210.281	1	3.74288e-07	0.999365	0.000635097	TRUE	FALSE
	10	48	1	29.2856	-9.66566	212.097	0.0203785	0.979622	0.866901	0.133099	FALSE	FALSE
	10	48	2	41.3644	-31.3482	306.757	0.00952696	0.990473	0.999998	2.10577e-06	FALSE	FALSE
	10	48	3	148.396	-4.59514	82.9452	7.23795e-06	0.999993	0.000105514	0.999894	FALSE	FALSE
	10	48	4	170.176	-5.92554	60.6884	2.65631e-06	0.999997	2.88282e-06	0.999997	FALSE	FALSE
	10	48	5	6.39893	-14.0026	221.817	1	1.18458e-07	0.998687	0.0013135	TRUE	FALSE
	10	48	6	57.7752	-8.02515	186.238	0.000179924	0.99982	0.979516	0.0204836	FALSE	FALSE
	1	49	1	183.157	-3.265	30.0414	9.76842e-07	0.999999	2.9887e-05	0.99997	FALSE	FALSE
	1	49	2	44.6402	-4.18459	198.871	0.00251396	0.997486	0.997897	0.00210259	FALSE	FALSE
	1	49	3	208.915	-3.89946	52.6947	1.43006e-06	0.999999	2.98404e-09	1	FALSE	FALSE
	1	49	4	46.4959	-28.9332	201.845	0.0215902	0.97841	0.999423	0.000576622	FALSE	FALSE
	1	49	5	38.3332	-27.4386	215.308	0.00248632	0.997514	0.999464	0.000535844	FALSE	FALSE
	1	49	6	32.5906	-19.2152	214.769	0.0194234	0.980577	0.997635	0.00236544	FALSE	FALSE
	1	49	7	13.1827	-20.1188	167.958	0.779473	0.220527	0.992832	0.00716833	TRUE	FALSE
	1	49	8	30.446	-19.3001	215.509	0.00320364	0.996796	0.997833	0.00216663	FALSE	FALSE
	1	49	9	130.377	-12.3099	128.827	2.09154e-05	0.999979	0.00765598	0.992344	FALSE	FALSE
	1	49	10	35.4232	-25.4558	183.344	0.0231233	0.976877	0.998133	0.00186738	FALSE	FALSE
	1	49	11	10.5758	-34.7125	238.287	0.999992	8.22118e-06	0.999988	1.23858e-05	TRUE	FALSE
	1	49	12	109.888	-18.6845	160.798	2.20341e-05	0.999978	0.331122	0.668878	FALSE	FALSE
	1	49	13	72.4434	-20.6148	147.378	3.91082e-05	0.999961	0.917424	0.0825756	FALSE	FALSE
	1	49	14	137.987	-16.2417	132.372	1.54775e-05	0.999985	0.0065066	0.993493	FALSE	FALSE
	1	49	15	31.0005	-15.0493	206.847	0.00739393	0.992606	0.995804	0.00419595	FALSE	FALSE
	1	49	16	22.1741	-17.0908	244.151	0.998364	0.00163569	0.99967	0.000329513	TRUE	FALSE
	1	50	1	24.1983	-5.29449	187.156	0.0729066	0.927093	0.995079	0.0049214	TRUE	FALSE
	1	50	2	19.0527	-19.9578	209.896	0.938626	0.0613742	0.997767	0.00223284	TRUE	FALSE
	1	50	3	168.098	-8.05623	87.8555	9.35359e-07	0.999999	9.86757e-06	0.99999	FALSE	FALSE
	1	50	4	18.3492	-13.8557	157.068	0.893215	0.106785	0.968342	0.0316578	TRUE	FALSE
	1	50	5	39.6557	-18.1191	192.018	0.00079789	0.999202	0.990801	0.00919861	FALSE	FALSE
	1	50	6	12.9331	-15.5718	147.017	1	3.83246e-07	0.971946	0.0280543	TRUE	FALSE
	1	51	1	209.097	3.82196	53.4233	1.87751e-05	0.999981	4.23402e-09	1	FALSE	FALSE
	1	51	2	36.9163	-21.1656	228.23	0.0282646	0.971735	0.998942	0.00105759	FALSE	FALSE
	1	51	3	38.6553	-1.03811	191.51	0.0340442	0.965956	0.998681	0.00131873	FALSE	FALSE
	1	51	4	40.7786	-0.0251127	168.227	0.0739805	0.926019	0.992419	0.0075807	FALSE	FALSE
	1	51	5	46.8682	-18.742	138.863	0.008839	0.991161	0.959964	0.0400365	FALSE	FALSE
	1	51	6	46.5489	-13.4748	89.2522	0.0114809	0.988519	0.831192	0.168808	FALSE	FALSE
	1	51	7	24.9204	-12.4508	229.634	0.783957	0.216043	0.999347	0.000653071	TRUE	FALSE
	1	51	8	52.5861	-9.67677	158.741	0.00282075	0.997179	0.906237	0.0937628	FALSE	FALSE
	1	51	9	35.1808	-9.68245	158.975	0.00522993	0.99477	0.947409	0.0525909	FALSE	FALSE
	1	51	10	39.0559	-20.8182	143.034	0.0106869	0.989313	0.985119	0.0148814	FALSE	FALSE
	1	51	11	107.661	-6.54151	76.4408	2.08772e-05	0.999979	0.010756	0.989244	FALSE	FALSE
	1	51	12	19.3983	-22.8974	163.903	0.690867	0.309133	0.996363	0.00363721	FALSE	FALSE
	1	51	13	29.1183	-1.19109	87.9797	0.0493166	0.950683	0.66347	0.33653	FALSE	FALSE
	1	51	14	57.2307	-19.2509	255.14	0.000693815	0.999306	0.999692	0.000307502	FALSE	FALSE
	1	51	15	48.4877	-13.3511	177.448	0.00272648	0.997274	0.966637	0.0333628	FALSE	FALSE
	1	51	16	138.422	-10.3086	80.7294	6.40696e-06	0.999994	0.000647352	0.999353	FALSE	FALSE
	1	51	17	23.3337	-32.6323	215.818	0.142522	0.857478	0.999949	5.094e-05	FALSE	FALSE
	1	51	18	76.2199	-26.7291	178.234	2.56784e-05	0.999974	0.990816	0.00918396	FALSE	FALSE
	1	51	19	37.9313	-26.6572	235.42	0.00101631	0.998984	0.999685	0.000314739	FALSE	FALSE
	1	51	20	67.473	-23.6331	208.515	4.3336e-05	0.999957	0.994152	0.00584811	FALSE	FALSE
	1	52	1	94.9589	6.55342	142.955	0.000829475	0.999171	0.389868	0.610132	FALSE	FALSE
	1	52	2	45.7219	4.33479	293.241	0.00117337	0.998827	1	8.19012e-11	FALSE	FALSE
	1	52	3	253.566	-6.81283	89.5734	9.55416e-08	1	2.05583e-12	1	FALSE	FALSE
	1	52	4	110.7	-17.8603	168.26	1.11884e-06	0.999999	0.346057	0.653943	FALSE	FALSE
	1	52	5	204.122	0.801858	77.0474	1.22318e-05	0.999988	2.40221e-08	1	FALSE	FALSE
	1	52	6	15.7292	-13.9589	202.442	0.0190454	0.980955	0.995588	0.00441187	FALSE	FALSE
	1	52	7	21.9192	-33.1668	237.125	0.00207466	0.997925	0.999972	2.77396e-05	FALSE	FALSE
	1	52	8	72.287	-23.9944	168.363	6.55408e-05	0.999934	0.978244	0.0217564	FALSE	FALSE
	1	52	9	13.6688	-17.4631	146.747	0.999843	0.000157467	0.981141	0.0188586	TRUE	FALSE
	1	52	10	82.0847	-11.7897	154.303	0.000373518	0.999626	0.612925	0.387075	FALSE	FALSE
	1	52	11	26.5787	-22.9416	225.142	0.147454	0.852546	0.99919	0.000809773	FALSE	FALSE
	1	52	12	16.7802	-21.9368	167.868	0.999362	0.000638113	0.995447	0.00455277	TRUE	FALSE
	1	52	13	23.3781	-17.955	180.913	0.10425	0.89575	0.990382	0.00961814	FALSE	FALSE
	1	52	14	66.0614	-29.664	189.571	0.00153976	0.99846	0.998696	0.00130407	FALSE	FALSE
	1	52	15	28.3459	-32.4945	259.018	0.477237	0.522763	0.99998	1.99314e-05	TRUE	FALSE
	1	52	16	74.3703	-18.4003	169.11	2.01957e-05	0.99998	0.905267	0.0947327	FALSE	FALSE
	0.3	53	1	159.307	6.76819	42.6098	2.18923e-06	0.999998	0.000675559	0.999324	FALSE	FALSE
	0.3	53	2	175.537	-3.30183	51.5641	4.33464e-06	0.999996	8.13909e-07	0.999999	FALSE	FALSE
	0.3	53	3	140.008	0.747221	59.2594	2.25378e-05	0.999977	0.00014759	0.999852	FALSE	FALSE
	0.3	53	4	171.699	3.4739	159.378	1.69615e-06	0.999998	0.00722506	0.992775	FALSE	FALSE
	0.3	53	5	167.239	-8.15899	145.374	1.16514e-05	0.999988	0.000184023	0.999816	FALSE	FALSE
	0.3	53	6	141.662	-24.9395	190.834	1.21545e-05	0.999988	0.1887	0.8113	FALSE	FALSE
	0.3	53	7	81.8783	-7.09228	161.214	8.2372e-06	0.999992	0.736819	0.263181	FALSE	FALSE
	0.3	53	8	104.119	-0.16384	205.305	0.000446398	0.999554	0.995738	0.00426235	FALSE	FALSE
	0.3	53	9	176.002	-1.98264	119.817	1.94031e-06	0.999998	2.05864e-05	0.999979	FALSE	FALSE
	0.3	53	10	154.393	-3.24717	75.0347	1.51949e-05	0.999985	3.5579e-05	0.999964	FALSE	FALSE
	0.3	53	11	134.778	-18.6643	155.582	2.20762e-06	0.999998	0.0312185	0.968781	FALSE	FALSE
	0.3	53	12	183.929	-5.6157	99.9456	2.72099e-06	0.999997	1.34197e-06	0.999999	FALSE	FALSE
	0.3	53	13	164.702	2.2352	53.8465	1.22272e-05	0.999988	4.78906e-06	0.999995	FALSE	FALSE
	0.3	53	14	128.803	4.1289	138.283	4.39465e-06	0.999996	0.135561	0.864439	FALSE	FALSE
	0.3	53	15	132.937	11.3929	45.4689	2.80883e-05	0.999972	0.00120321	0.998797	FALSE	FALSE
	0.3	53	16	166.589	-5.9883	83.1505	6.90857e-06	0.999993	9.13534e-06	0.999991	FALSE	FALSE
	0.3	53	17	77.1085	9.09029	134.556	0.000480523	0.999519	0.981302	0.0186976	FALSE	FALSE
	0.3	53	18	162.792	-0.408564	91.2409	2.05663e-06	0.999998	2.7881e-05	0.999972	FALSE	FALSE
	0.3	53	19	196.763	-0.621983	30.0703	2.08197e-06	0.999998	1.2458e-08	1	FALSE	FALSE
	0.3	53	20	132.863	-6.74973	103.582	3.65866e-05	0.999963	0.00157208	0.998428	FALSE	FALSE
	0.3	53	21	107.366	-5.59246	143.559	3.18649e-05	0.999968	0.138389	0.861611	FALSE	FALSE
	0.3	53	22	145.379	-10.1792	80.9221	6.64958e-05	0.999934	0.0002604	0.99974	FALSE	FALSE
	0.3	53	23	130.515	-5.82808	116.906	6.88231e-06	0.999993	0.00367631	0.996324	FALSE	FALSE
	0.3	53	24	79.0144	-4.08554	105.992	0.000119302	0.999881	0.201215	0.798785	FALSE	FALSE
	0.3	53	25	125.099	0.425595	83.8161	2.31996e-05	0.999977	0.00219729	0.997803	FALSE	FALSE
	0.3	53	26	96.253	-6.54076	126.173	3.9955e-05	0.99996	0.129418	0.870582	FALSE	FALSE
	0.3	53	27	175.222	2.4154	55.9275	2.70222e-06	0.999997	1.11064e-06	0.999999	FALSE	FALSE
	0.3	53	28	62.9404	0.84808	127.11	0.00251778	0.997482	0.780973	0.219027	FALSE	FALSE
	0.3	53	29	148.885	-0.613103	79.5278	9.2568e-06	0.999991	9.73441e-05	0.999903	FALSE	FALSE
	0.3	53	30	42.6116	-15.3807	229.585	0.00598533	0.994015	0.998809	0.00119071	FALSE	FALSE
	0.3	53	31	78.6562	-23.4122	158.355	0.00023917	0.999761	0.954365	0.0456348	FALSE	FALSE
	0.3	53	32	121.092	1.04162	51.4395	4.03084e-05	0.99996	0.00109481	0.998905	FALSE	FALSE
	0.3	53	33	32.5527	-16.6452	176.462	0.0104216	0.989578	0.983499	0.016501	FALSE	FALSE
	0.3	53	34	69.7069	-3.44409	121.755	0.000465905	0.999534	0.484702	0.515298	FALSE	FALSE
	0.3	53	35	133.34	9.096	29.5944	2.68184e-05	0.999973	0.000305749	0.999694	FALSE	FALSE
	0.3	53	36	75.3804	-7.12599	119.889	0.00084973	0.99915	0.346988	0.653012	FALSE	FALSE
	0.3	54	1	179.704	-1.80325	52.66	8.84406e-06	0.999991	4.07844e-07	1	FALSE	FALSE
	0.3	54	2	194.422	2.54134	20.871	2.2952e-06	0.999998	1.43057e-08	1	FALSE	FALSE
	0.3	54	3	189.922	-2.65019	64.6884	2.13996e-06	0.999998	1.16913e-07	1	FALSE	FALSE
	0.3	54	4	145.098	-2.93624	103.469	0.000301622	0.999698	0.000410736	0.999589	FALSE	FALSE
	0.3	54	5	90.522	18.385	91.6601	2.56814e-06	0.999997	0.982053	0.017947	FALSE	FALSE
	0.3	54	6	151.005	-13.9978	125.059	7.94341e-06	0.999992	0.000705193	0.999295	FALSE	FALSE
	0.3	54	7	169.097	-0.794787	96.9926	5.08427e-06	0.999995	1.52095e-05	0.999985	FALSE	FALSE
	0.3	54	8	174.967	-4.94401	72.0882	8.59968e-06	0.999991	1.72883e-06	0.999998	FALSE	FALSE
	0.3	54	9	145.763	-0.398051	48.9072	8.67766e-06	0.999991	5.04099e-05	0.99995	FALSE	FALSE
	0.3	54	10	134.104	-1.99003	61.5923	3.11638e-06	0.999997	0.000313414	0.999687	FALSE	FALSE
	0.3	54	11	169.03	-2.78973	71.3077	3.06375e-06	0.999997	3.92233e-06	0.999996	FALSE	FALSE
	0.3	54	12	152.72	-0.413429	65.0973	2.24765e-05	0.999978	3.30384e-05	0.999967	FALSE	FALSE
	0.3	54	13	125.759	-7.73748	86.6393	1.57699e-05	0.999984	0.00223023	0.99777	FALSE	FALSE
	0.3	54	14	125.273	-5.40087	103.483	1.63136e-05	0.999984	0.00359958	0.9964	FALSE	FALSE
	0.3	54	15	178.549	0.341812	19.2528	3.68736e-06	0.999996	2.1263e-07	1	FALSE	FALSE
	0.3	54	16	159.052	0.165021	45.2902	1.88194e-05	0.999981	7.36195e-06	0.999993	FALSE	FALSE
	0.3	54	17	170.119	-3.87086	46.2538	2.72333e-06	0.999997	1.76891e-06	0.999998	FALSE	FALSE
	0.3	54	18	167.08	-3.99573	97.1599	3.61246e-06	0.999996	1.51966e-05	0.999985	FALSE	FALSE
	0.3	54	19	184.462	-2.84265	35.8192	3.80884e-06	0.999996	1.34266e-07	1	FALSE	FALSE
	0.3	54	20	217.184	-2.34441	35.94	2.15417e-06	0.999998	3.64985e-10	1	FALSE	FALSE
	0.3	54	21	161.253	-1.81072	52.8222	1.73845e-05	0.999983	6.73278e-06	0.999993	FALSE	FALSE
	0.3	54	22	162.394	-3.11082	45.7863	6.33409e-06	0.999994	5.22922e-06	0.999995	FALSE	FALSE
	0.3	54	23	165.113	-4.63794	65.5337	5.7257e-06	0.999994	6.14277e-06	0.999994	FALSE	FALSE
	0.3	54	24	126.13	-7.79782	66.9755	1.13302e-05	0.999989	0.00153634	0.998464	FALSE	FALSE
	0.3	54	25	137.894	-3.22353	64.501	1.65201e-05	0.999983	0.000220633	0.999779	FALSE	FALSE
	0.3	54	26	150.048	-5.07998	49.2447	2.52877e-05	0.999975	3.96422e-05	0.99996	FALSE	FALSE
	0.3	54	27	142.376	3.7976	57.3324	1.85661e-05	0.999981	0.00013461	0.999865	FALSE	FALSE
	0.3	54	28	185.858	-1.96372	43.9483	6.39e-06	0.999994	1.18788e-07	1	FALSE	FALSE
	0.3	55	1	179.169	9.40946	24.6538	4.67302e-06	0.999995	4.39239e-07	1	FALSE	FALSE
	0.3	55	2	194.877	-3.28263	103.043	4.77019e-06	0.999995	3.19531e-07	1	FALSE	FALSE
	0.3	55	3	185.884	-3.97802	66.5617	1.38934e-06	0.999999	2.47612e-07	1	FALSE	FALSE
	0.3	55	4	213.611	-2.24051	78.7223	2.36517e-07	1	3.59759e-09	1	FALSE	FALSE
	0.3	55	5	163.346	-11.2825	99.7496	5.82052e-05	0.999942	4.07573e-05	0.999959	FALSE	FALSE
	0.3	55	6	132.459	19.8894	29.9839	3.38483e-05	0.999966	0.0131426	0.986857	FALSE	FALSE
	0.3	55	7	113.484	-8.29979	199.952	3.00235e-05	0.99997	0.81931	0.18069	FALSE	FALSE
	0.3	55	8	111.535	-20.7078	146.911	1.01215e-06	0.999999	0.322384	0.677616	FALSE	FALSE
	0.3	55	9	116.903	-11.8078	109.136	9.17613e-07	0.999999	0.016599	0.983401	FALSE	FALSE
	0.3	55	10	202.451	-0.201272	34.0006	3.1089e-06	0.999997	4.92132e-09	1	FALSE	FALSE
	0.3	55	11	269.244	-4.22474	40.2917	8.61856e-08	1	7.14486e-15	1	FALSE	FALSE
	0.3	55	12	132.066	-6.36969	76.7521	2.51694e-06	0.999997	0.000746498	0.999254	FALSE	FALSE
	0.3	55	13	130.834	-0.521889	107.167	0.000567449	0.999433	0.00352141	0.996479	FALSE	FALSE
	0.3	55	14	168.579	-4.92364	52.3355	1.01223e-05	0.99999	2.79064e-06	0.999997	FALSE	FALSE
	0.3	55	15	153.567	-10.2051	79.3201	1.24846e-05	0.999988	8.50354e-05	0.999915	FALSE	FALSE
	0.3	55	16	110.919	-2.33031	86.2083	2.9556e-05	0.99997	0.00859245	0.991408	FALSE	FALSE
	0.3	55	17	104.207	-11.5643	111.728	8.65346e-06	0.999991	0.0567749	0.943225	FALSE	FALSE
	0.3	55	18	165.499	9.24112	17.3852	2.31961e-06	0.999998	2.5542e-06	0.999997	FALSE	FALSE
	0.3	55	19	174.182	-1.3818	40.8001	2.15396e-05	0.999978	7.04333e-07	0.999999	FALSE	FALSE
	0.3	55	20	158.326	3.10786	20.6098	4.34557e-06	0.999996	4.60985e-06	0.999995	FALSE	FALSE
	0.3	55	21	163.098	-2.83036	46.2729	3.31654e-05	0.999967	4.65409e-06	0.999995	FALSE	FALSE
	0.3	55	22	127.228	-3.75726	92.2575	0.000585488	0.999415	0.0019011	0.998099	FALSE	FALSE
	0.3	55	23	149.487	-2.49184	24.4008	4.91864e-06	0.999995	2.44224e-05	0.999976	FALSE	FALSE
	0.3	55	24	157.884	0.728453	43.4865	1.8099e-05	0.999982	8.31147e-06	0.999992	FALSE	FALSE
	0.3	55	25	149.417	-0.672049	49.6684	2.7414e-05	0.999973	3.16536e-05	0.999968	FALSE	FALSE
	0.3	55	26	99.4967	-10.9937	100.226	5.89787e-05	0.999941	0.0627478	0.937252	FALSE	FALSE
	0.3	55	27	155.274	0.411031	49.459	3.89448e-06	0.999996	1.41787e-05	0.999986	FALSE	FALSE
	0.3	55	28	203.536	-3.40968	47.7572	9.56164e-07	0.999999	6.70225e-09	1	FALSE	FALSE
	0.3	55	29	163.413	-1.2065	63.7677	2.88488e-05	0.999971	6.9232e-06	0.999993	FALSE	FALSE
	0.3	55	30	135.781	3.29247	61.9735	4.50784e-05	0.999955	0.000345475	0.999655	FALSE	FALSE
	0.3	55	31	150.071	-5.371	48.2696	3.68877e-05	0.999963	4.06789e-05	0.999959	FALSE	FALSE
	0.3	55	32	70.8213	-3.48138	122.278	0.00081863	0.999181	0.473514	0.526486	FALSE	FALSE
	0.3	55	33	207.017	1.39454	7.73498	3.2856e-07	1	1.13464e-09	1	FALSE	FALSE
	0.3	55	34	134.742	1.07848	45.7707	7.04321e-05	0.99993	0.000190958	0.999809	FALSE	FALSE
	0.3	56	1	118.245	-4.91879	91.0848	1.5413e-05	0.999985	0.0047793	0.995221	FALSE	FALSE
	0.3	56	2	118.776	-10.9013	119.902	4.49529e-05	0.999955	0.0165989	0.983401	FALSE	FALSE
	0.3	56	3	206.46	-4.47448	75.3749	1.82964e-06	0.999998	1.04901e-08	1	FALSE	FALSE
	0.3	56	4	211.476	-3.23055	68.5644	5.14023e-07	0.999999	3.20431e-09	1	FALSE	FALSE
	0.3	56	5	169.621	11.1504	42.1457	3.04875e-06	0.999997	7.40204e-06	0.999993	FALSE	FALSE
	0.3	56	6	185.33	-3.15619	88.7251	3.99456e-06	0.999996	6.81664e-07	0.999999	FALSE	FALSE
	0.3	56	7	102.527	-14.3088	170.525	9.91468e-05	0.999901	0.4572	0.5428	FALSE	FALSE
	0.3	56	8	90.6925	9.45471	119.252	2.76532e-05	0.999972	0.865189	0.134811	FALSE	FALSE
	0.3	56	9	201.008	3.23489	26.4642	4.17313e-06	0.999996	5.38721e-09	1	FALSE	FALSE
	0.3	56	10	104.337	7.29491	82.7665	3.8881e-06	0.999996	0.0588819	0.941118	FALSE	FALSE
	0.3	56	11	119.659	-9.80214	78.14	2.64221e-05	0.999974	0.00516818	0.994832	FALSE	FALSE
	0.3	56	12	147.669	3.0908	40.0286	8.30012e-06	0.999992	3.35321e-05	0.999966	FALSE	FALSE
	0.3	56	13	99.9487	-5.91253	82.4644	6.98481e-05	0.99993	0.0235048	0.976495	FALSE	FALSE
	0.3	56	14	153.283	4.65215	18.5981	6.85736e-06	0.999993	9.47152e-06	0.999991	FALSE	FALSE
	0.3	56	15	157.561	-5.39617	45.1556	1.81394e-05	0.999982	1.37077e-05	0.999986	FALSE	FALSE
	0.3	56	16	148.139	1.60768	45.8386	3.80568e-05	0.999962	3.48517e-05	0.999965	FALSE	FALSE
	0.3	56	17	173.224	1.75886	24.0471	1.20338e-05	0.999988	5.19004e-07	0.999999	FALSE	FALSE
	0.3	56	18	173.101	-6.55159	63.2972	4.65208e-06	0.999995	2.0927e-06	0.999998	FALSE	FALSE
	0.3	56	19	171.588	1.02872	11.7407	7.43921e-06	0.999993	5.64957e-07	0.999999	FALSE	FALSE
	0.3	56	20	71.6033	3.96097	115.909	0.000144136	0.999856	0.698919	0.301081	FALSE	FALSE
	0.3	56	21	106.421	-1.61712	47.3796	0.000138007	0.999862	0.00502733	0.994973	FALSE	FALSE
	0.3	56	22	208.605	1.6839	8.65049	4.09839e-06	0.999996	8.43918e-10	1	FALSE	FALSE
	0.3	56	23	131.724	0.523785	56.8597	1.5378e-05	0.999985	0.000371101	0.999629	FALSE	FALSE
	0.3	56	24	179.248	4.59186	23.4985	2.66432e-06	0.999997	2.13674e-07	1	FALSE	FALSE
	2	57	1	108.583	-9.17075	80.2038	9.95654e-05	0.9999	0.0150485	0.984951	FALSE	FALSE
	2	57	2	45.4858	-18.2772	174.436	0.00104863	0.998951	0.979177	0.0208233	FALSE	FALSE
	2	57	3	168.844	-16.7969	147.785	7.78636e-06	0.999992	0.000230595	0.999769	FALSE	FALSE
	2	57	4	36.9578	-8.06241	216.312	0.0147319	0.985268	0.998964	0.00103622	FALSE	FALSE
	2	57	5	29.2704	-31.2255	281.627	0.00881216	0.991188	0.99999	9.53132e-06	FALSE	FALSE
	2	57	6	35.6689	-14.9369	260.42	0.0367756	0.963224	0.999926	7.39296e-05	FALSE	FALSE
	2	57	7	28.9882	-20.867	168.237	0.0744782	0.925522	0.991905	0.00809504	FALSE	FALSE
	2	57	8	32.7814	-18.3835	137.722	0.043005	0.956995	0.974123	0.025877	FALSE	FALSE
	2	57	9	29.0528	-17.4739	136.523	0.161055	0.838945	0.97026	0.0297398	FALSE	FALSE
	2	57	10	9.19584	-15.1129	144.667	0.999927	7.26979e-05	0.969801	0.030199	TRUE	FALSE
	2	57	11	124.094	-13.999	216.127	1.15742e-05	0.999988	0.750814	0.249186	FALSE	FALSE
	2	57	12	71.8087	-23.1043	204.516	0.00395645	0.996044	0.990332	0.00966795	FALSE	FALSE
	2	57	13	60.8222	-38.5908	265.15	8.13876e-05	0.999919	0.999996	3.99692e-06	FALSE	FALSE
	2	57	14	127.36	-13.1256	151.329	6.29874e-06	0.999994	0.0288638	0.971136	FALSE	FALSE
	2	57	15	159.618	-8.07947	82.4631	5.84343e-06	0.999994	2.86593e-05	0.999971	FALSE	FALSE
	2	57	16	15.37	-26.5983	195.441	0.999908	9.20432e-05	0.999336	0.00066356	TRUE	FALSE
	2	57	17	91.029	-2.98477	156.675	1.32216e-05	0.999987	0.685529	0.314471	FALSE	FALSE
	2	57	18	36.0869	-18.5728	242.913	0.000250825	0.999749	0.99955	0.000450315	FALSE	FALSE
	2	58	1	235	-2.39002	19.0754	3.13563e-08	1	1.22465e-09	1	FALSE	FALSE
	2	58	2	119.597	-4.33811	124.257	9.29373e-06	0.999991	0.01847	0.98153	FALSE	FALSE
	2	58	3	48.5947	-29.1343	242.554	0.000258437	0.999742	0.999828	0.000171515	FALSE	FALSE
	2	58	4	33.9511	-37.0198	255.834	0.0064328	0.993567	0.999996	4.30527e-06	FALSE	FALSE
	2	58	5	99.15	-7.03256	157.991	2.44968e-05	0.999976	0.402088	0.597912	FALSE	FALSE
	2	58	6	162.106	-20.1145	162.597	1.04027e-06	0.999999	0.00192528	0.998075	FALSE	FALSE
	2	58	7	45.0348	6.16269	151.346	0.00469455	0.995305	0.996239	0.00376094	FALSE	FALSE
	2	58	8	39.1353	-13.0903	140.529	0.0347134	0.965287	0.910134	0.0898655	FALSE	FALSE
	2	58	9	44.8851	-20.9667	281.476	0.0145781	0.985422	0.999974	2.5543e-05	FALSE	FALSE
	2	58	10	117.138	-2.64857	135.639	8.84768e-06	0.999991	0.0572939	0.942706	FALSE	FALSE
	2	58	11	31.9863	-9.42697	186.889	0.0183003	0.9817	0.989223	0.0107772	FALSE	FALSE
	2	58	12	165.697	-3.57257	49.5317	5.5843e-06	0.999994	3.58003e-06	0.999996	FALSE	FALSE
	2	58	13	155.302	-0.198995	26.2124	2.12599e-05	0.999979	8.61488e-06	0.999991	FALSE	FALSE
	2	58	14	80.9168	-8.08499	100.849	3.25262e-05	0.999967	0.176725	0.823275	FALSE	FALSE
	2	58	15	179.061	-1.9446	64.2958	3.41127e-06	0.999997	6.64791e-07	0.999999	FALSE	FALSE
	2	58	16	75.3415	-7.79715	166.633	2.05023e-05	0.999979	0.84508	0.15492	FALSE	FALSE
	2	58	17	147.222	4.00363	38.7248	9.6395e-06	0.99999	3.64997e-05	0.999964	FALSE	FALSE
	2	58	18	130.778	-5.17678	47.1746	2.03427e-05	0.99998	0.000483731	0.999516	FALSE	FALSE
	2	58	19	85.0997	-8.79154	122.423	0.000141815	0.999858	0.236799	0.763201	FALSE	FALSE
	2	58	20	7.18709	-12.6431	226.076	0.999999	6.11676e-07	0.999145	0.000854758	TRUE	FALSE
	2	59	1	134.983	2.04907	68.3843	2.44733e-05	0.999976	0.000431011	0.999569	FALSE	FALSE
	2	59	2	118.136	-6.61105	54.9663	3.00224e-05	0.99997	0.0028269	0.997173	FALSE	FALSE
	2	59	3	30.9681	-2.52667	160.752	0.00972555	0.990274	0.98007	0.0199299	FALSE	FALSE
	2	59	4	29.4503	-5.2139	208.547	0.0163625	0.983637	0.999111	0.000888992	FALSE	FALSE
	2	59	5	175.119	-7.49965	114.469	1.7946e-06	0.999998	1.01985e-05	0.99999	FALSE	FALSE
	2	59	6	56.6415	4.16763	174.784	1.54856e-05	0.999985	0.998609	0.00139079	FALSE	FALSE
	2	59	7	190.325	7.45372	5.70716	1.64167e-06	0.999998	2.51552e-08	1	FALSE	FALSE
	2	59	8	208.541	-2.77039	47.7253	1.24081e-06	0.999999	2.60392e-09	1	FALSE	FALSE
	2	59	9	174.591	-1.6658	58.1964	6.32228e-06	0.999994	1.07846e-06	0.999999	FALSE	FALSE
	2	59	10	163.263	-3.13376	85.8205	6.76361e-06	0.999993	1.60002e-05	0.999984	FALSE	FALSE
	2	59	11	168.546	-8.41788	78.8955	7.56581e-06	0.999992	7.49525e-06	0.999993	FALSE	FALSE
	2	59	12	130.085	-5.65854	74.2589	3.09761e-05	0.999969	0.000836293	0.999164	FALSE	FALSE
	2	59	13	140.11	-6.12751	72.0587	1.43558e-05	0.999986	0.000245432	0.999755	FALSE	FALSE
	2	59	14	122.238	-4.51801	101.128	6.81976e-05	0.999932	0.00457733	0.995423	FALSE	FALSE
	2	59	15	144.087	-0.92068	30.9127	1.1167e-05	0.999989	4.58011e-05	0.999954	FALSE	FALSE
	2	59	16	111.666	-8.36318	90.5015	4.74904e-05	0.999953	0.0116675	0.988333	FALSE	FALSE
	2	59	17	73.1182	-11.1142	144.581	0.000168881	0.999831	0.644204	0.355796	FALSE	FALSE
	2	59	18	11.9068	1.19537	141.762	0.999772	0.000228459	0.977446	0.0225541	TRUE	FALSE
	2	60	1	85.1873	-1.56348	90.8666	0.000941121	0.999059	0.09174	0.90826	FALSE	FALSE
	2	60	2	45.8937	-18.1304	207.756	0.080662	0.919338	0.994736	0.0052641	TRUE	FALSE
	2	60	3	206.687	-2.75569	44.6039	1.71542e-07	1	3.34669e-09	1	FALSE	FALSE
	2	60	4	33.896	-28.8515	237.863	0.0359882	0.964012	0.999851	0.000148989	FALSE	FALSE
	2	60	5	201.091	-6.45374	83.9445	2.68012e-06	0.999997	3.99431e-08	1	FALSE	FALSE
	2	60	6	10.3812	-25.7228	231.23	1	1.39618e-08	0.999685	0.00031457	TRUE	FALSE
	3	61	1	134.018	-14.1223	138.241	2.10177e-06	0.999998	0.00889614	0.991104	FALSE	FALSE
	3	61	2	14.2832	-28.6875	238.608	0.984306	0.0156943	0.999885	0.000114817	TRUE	FALSE
	3	61	3	43.5345	-21.3077	163.862	0.0042985	0.995701	0.987546	0.0124538	FALSE	FALSE
	3	61	4	31.206	-26.067	206.874	0.24727	0.75273	0.999155	0.000845338	FALSE	FALSE
	3	61	5	7.75219	-17.3199	153.969	0.999832	0.000168206	0.983642	0.0163578	TRUE	FALSE
	3	61	6	143.715	-4.21956	99.9787	6.79224e-06	0.999993	0.000379096	0.999621	FALSE	FALSE
	3	61	7	57.0168	-15.5937	147.33	0.000145712	0.999854	0.8906	0.1094	FALSE	FALSE
	0.2	62	1	145.153	-2.65383	40.5096	1.95442e-05	0.99998	5.21697e-05	0.999948	FALSE	FALSE
	0.2	62	2	96.2975	-2.46054	162.029	0.00285614	0.997144	0.719809	0.280191	FALSE	FALSE
	0.2	62	3	165.482	0.187455	15.5456	1.16002e-05	0.999988	1.6252e-06	0.999998	FALSE	FALSE
	0.2	62	4	124.926	-16.2826	144.074	5.12472e-06	0.999995	0.0394623	0.960538	FALSE	FALSE
	0.2	62	5	103.836	5.51565	11.026	0.000150455	0.99985	0.00350787	0.996492	FALSE	FALSE
	0.2	62	6	89.9311	1.15322	88.6007	0.000106814	0.999893	0.0752766	0.924723	FALSE	FALSE
	0.2	62	7	102.559	-7.34635	92.9792	5.56471e-05	0.999944	0.0264742	0.973526	FALSE	FALSE
	0.2	62	8	105.746	-6.16958	85.6053	0.000780546	0.999219	0.0150581	0.984942	FALSE	FALSE
	0.2	62	9	94.9922	2.40923	84.0693	0.000266773	0.999733	0.0495094	0.950491	FALSE	FALSE
	0.2	62	10	94.9698	-3.59631	71.686	0.0155195	0.984481	0.0250639	0.974936	FALSE	FALSE
	0.2	62	11	128.634	1.24496	22.7526	8.92971e-05	0.999911	0.000263431	0.999737	FALSE	FALSE
	0.2	62	12	105.803	-6.74186	53.8534	0.000404573	0.999595	0.0107149	0.989285	FALSE	FALSE
	0.2	62	13	116.25	0.580666	33.3597	0.000175416	0.999825	0.00130681	0.998693	FALSE	FALSE
	10	63	1	136.815	-8.38897	116.08	6.16128e-06	0.999994	0.00172026	0.99828	FALSE	FALSE
	10	63	2	186.19	-5.33541	59.2516	2.38998e-06	0.999998	2.07745e-07	1	FALSE	FALSE
	10	63	3	184.17	-1.26699	59.907	2.65058e-06	0.999997	2.54206e-07	1	FALSE	FALSE
	10	63	4	217.135	-5.95796	72.6975	9.14808e-07	0.999999	1.41416e-09	1	FALSE	FALSE
	10	63	5	205.755	-10.7999	78.711	1.73654e-06	0.999998	2.38512e-08	1	FALSE	FALSE
	10	63	6	77.1524	-0.151677	132.769	3.21617e-05	0.999968	0.649715	0.350285	FALSE	FALSE
	10	63	7	9.82936	-34.3719	241.898	0.99918	0.000820115	0.999987	1.34375e-05	TRUE	FALSE
	10	63	8	163.661	4.71261	28.2044	4.40354e-06	0.999996	2.7594e-06	0.999997	FALSE	FALSE
	10	63	9	26.9161	-8.40872	206.075	0.0181268	0.981873	0.997779	0.00222083	FALSE	FALSE
	10	63	10	5.22888	-27.7512	239.37	0.999918	8.17944e-05	0.999859	0.000140882	TRUE	FALSE
	10	63	11	10.8802	-28.2099	239.624	0.999964	3.64902e-05	0.999876	0.000124247	TRUE	FALSE
	0	64	1	74.9423	-1.29061	167.893	1.45857e-05	0.999985	0.956815	0.043185	FALSE	TRUE
	0	64	2	109.376	-2.55366	51.0475	1.55975e-05	0.999984	0.00418099	0.995819	FALSE	TRUE
	0	64	3	120.665	-0.558342	49.8778	2.56444e-05	0.999974	0.00110127	0.998899	FALSE	TRUE
	0	64	4	78.5243	-8.74025	125.911	3.38049e-05	0.999966	0.359174	0.640826	FALSE	TRUE
	0	64	5	107.147	-11.1473	98.3671	0.000150577	0.999849	0.0313685	0.968631	FALSE	TRUE
	0	64	6	112.321	2.52817	88.7574	8.11149e-06	0.999992	0.0138823	0.986118	FALSE	TRUE
	0	64	7	74.0205	-0.115299	142.671	9.13694e-05	0.999909	0.816907	0.183093	FALSE	TRUE
	0	64	8	160.581	-1.58838	23.9835	6.65594e-06	0.999993	4.3764e-06	0.999996	FALSE	TRUE
	0	64	9	158.185	-0.641058	46.2138	1.94288e-05	0.999981	8.58254e-06	0.999991	FALSE	TRUE
	5	65	1	144.296	-8.73235	50.0382	1.5431e-06	0.999998	0.00265996	0.99734	FALSE	FALSE
	5	65	2	131.085	1.77189	55.3958	9.16454e-06	0.999991	0.000406093	0.999594	FALSE	FALSE
	5	65	3	57.3679	-0.55417	112.485	0.00335898	0.996641	0.619753	0.380247	FALSE	FALSE
	5	65	4	41.3588	-16.2756	144.121	0.0559593	0.944041	0.945898	0.0541016	FALSE	FALSE
	5	65	5	149.798	1.16707	30.4203	6.54765e-06	0.999993	1.89217e-05	0.999981	FALSE	FALSE
	5	65	6	179.48	-1.6261	30.5993	3.95562e-06	0.999996	2.51089e-07	1	FALSE	FALSE
	5	65	7	150.489	1.58415	46.3549	1.91017e-06	0.999998	2.57928e-05	0.999974	FALSE	FALSE
	5	65	8	156.902	1.86921	7.50716	1.26142e-05	0.999987	4.85195e-06	0.999995	FALSE	FALSE
	5	65	9	79.1788	-1.84403	55.4731	0.000706307	0.999294	0.062074	0.937926	FALSE	FALSE
	5	65	10	15.5361	-24.2211	197.824	0.257083	0.742917	0.998648	0.00135201	FALSE	FALSE
	5	65	11	51.9644	-10.8126	137.044	0.000490857	0.999509	0.809095	0.190905	FALSE	FALSE
	5	65	12	76.2082	3.87613	71.0553	0.000358169	0.999642	0.135281	0.864719	FALSE	FALSE
	5	65	13	47.1571	-20.0364	140.326	0.0569942	0.943006	0.972678	0.0273221	FALSE	FALSE
	5	65	14	16.6119	-23.5773	291.36	0.998271	0.0017291	0.99999	9.79614e-06	TRUE	FALSE
	5	65	15	42.9396	-11.1897	82.8553	0.00481348	0.995187	0.765589	0.234411	FALSE	FALSE
	5	65	16	19.1278	-22.0521	162.031	0.999405	0.000594571	0.995134	0.0048664	TRUE	FALSE
	0.3	66	1	197.086	-4.63555	56.1348	4.64975e-06	0.999995	2.85769e-08	1	FALSE	FALSE
	0.3	66	2	191.307	1.63344	43.5482	1.48264e-06	0.999999	4.79623e-08	1	FALSE	FALSE
	0.3	66	3	163.164	7.6335	11.5557	2.80433e-06	0.999997	2.36497e-06	0.999998	FALSE	FALSE
	0.3	66	4	117.475	-13.4554	118.864	3.60342e-05	0.999964	0.0257133	0.974287	FALSE	FALSE
	0.3	66	5	89.7648	-13.1533	191.713	3.70609e-05	0.999963	0.88406	0.11594	FALSE	FALSE
	0.3	66	6	76.5189	9.03055	133.667	0.000817363	0.999183	0.979799	0.0202014	FALSE	FALSE
	0.3	66	7	165.948	-4.62596	98.6723	6.75935e-06	0.999993	1.86892e-05	0.999981	FALSE	FALSE
	0.3	66	8	62.4177	-16.9759	200.018	0.000546449	0.999454	0.983822	0.0161779	FALSE	FALSE
	0.3	66	9	81.7386	3.79417	103.53	0.000182472	0.999818	0.346726	0.653274	FALSE	FALSE
	0.3	66	10	27.9511	3.31571	139.814	0.775284	0.224716	0.982205	0.0177954	TRUE	FALSE
	0.3	66	11	101.806	-1.41291	78.6052	4.07839e-05	0.999959	0.0160445	0.983955	FALSE	FALSE
	0.3	66	12	60.7301	-3.92718	154.474	0.00474589	0.995254	0.900792	0.0992081	FALSE	FALSE
	0.3	66	13	38.9215	-7.26833	136.642	0.00279068	0.997209	0.86291	0.13709	FALSE	FALSE
	0.3	66	14	49.261	-6.11413	92.6799	0.000310159	0.99969	0.521511	0.478489	FALSE	FALSE
	0.3	66	15	210.002	3.67436	33.3344	1.13046e-06	0.999999	1.39554e-09	1	FALSE	FALSE
	0.3	66	16	50.2794	-10.5139	146.398	0.00115084	0.998849	0.862115	0.137885	FALSE	FALSE
	0.3	66	17	89.6539	-2.19065	88.881	4.45502e-05	0.999955	0.0604401	0.93956	FALSE	FALSE
	0.3	66	18	168.023	-3.83786	39.481	1.36393e-06	0.999999	2.18646e-06	0.999998	FALSE	FALSE
	1	67	1	69.1449	-11.7946	142.962	0.000217627	0.999782	0.693531	0.306469	FALSE	FALSE
	1	67	2	23.4561	2.05227	185.927	0.0301109	0.969889	0.999442	0.000557529	FALSE	FALSE
	1	67	3	54.1532	9.05787	142.57	6.61254e-05	0.999934	0.996937	0.00306333	FALSE	FALSE
	1	67	4	37.1952	-26.5855	170.884	0.0125939	0.987406	0.998563	0.00143708	FALSE	FALSE
	1	67	5	78.1655	-8.89878	72.0367	0.000391991	0.999608	0.172371	0.827629	FALSE	FALSE
	1	67	6	34.3452	-19.6298	188.424	0.0110587	0.988941	0.992707	0.00729319	FALSE	FALSE
	1	67	7	23.6041	-7.92134	184.445	0.00165479	0.998345	0.990783	0.00921689	FALSE	FALSE
	1	67	8	10.7584	-24.5764	198.918	0.99704	0.00296027	0.998868	0.00113246	TRUE	FALSE
	1	67	9	11.2058	-24.4713	207.585	0.999569	0.000430705	0.999058	0.000942148	TRUE	FALSE
	1	67	10	12.4688	-30.3265	258.907	0.999753	0.000247265	0.999967	3.29045e-05	TRUE	FALSE
	0.5	68	1	173.235	-2.88719	37.2427	5.78234e-06	0.999994	8.49809e-07	0.999999	FALSE	FALSE
	0.5	68	2	145.531	-9.39402	76.6635	9.77083e-06	0.99999	0.000207568	0.999792	FALSE	FALSE
	0.5	68	3	150.352	-6.88305	77.3458	1.19373e-05	0.999988	7.90973e-05	0.999921	FALSE	FALSE
	0.5	68	4	185.524	-2.15053	43.9832	3.69341e-06	0.999996	1.26804e-07	1	FALSE	FALSE
	0.5	68	5	87.5416	-25.3908	164.223	5.37001e-06	0.999995	0.960038	0.0399616	FALSE	FALSE
	0.5	68	6	180.621	0.623887	19.8603	1.62235e-06	0.999998	1.50538e-07	1	FALSE	FALSE
	0.5	68	7	164.816	4.46524	4.96508	2.67493e-06	0.999997	1.32573e-06	0.999999	FALSE	FALSE
	0.5	68	8	112.375	-8.13431	75.6149	2.13304e-05	0.999979	0.0081701	0.99183	FALSE	FALSE
	0.5	68	9	179.324	-0.504199	31.7766	4.68034e-06	0.999995	2.4539e-07	1	FALSE	FALSE
	0.5	68	10	162.982	-5.3054	38.368	4.82785e-06	0.999995	5.724e-06	0.999994	FALSE	FALSE
	0.5	68	11	163.541	-2.36397	49.8791	1.36764e-05	0.999986	4.57887e-06	0.999995	FALSE	FALSE
	0.5	68	12	169.651	-3.01553	69.8982	1.52513e-06	0.999998	3.40134e-06	0.999997	FALSE	FALSE
	0.5	68	13	179.134	-2.59868	61.9489	4.03017e-06	0.999996	6.0568e-07	0.999999	FALSE	FALSE
	0.5	68	14	161.138	-0.622655	56.1717	1.51564e-06	0.999998	7.49891e-06	0.999993	FALSE	FALSE
	0.5	68	15	153.352	0.161476	46.7985	1.91217e-05	0.999981	1.70943e-05	0.999983	FALSE	FALSE
	0.5	68	16	132.224	-8.46282	67.0564	1.07707e-05	0.999989	0.000835468	0.999165	FALSE	FALSE
	0.5	68	17	109.596	2.51932	38.9368	2.66831e-05	0.999973	0.00288293	0.997117	FALSE	FALSE
	0.5	68	18	184.342	-0.921169	33.1564	1.98675e-06	0.999998	1.13183e-07	1	FALSE	FALSE
	0.5	68	19	10.5372	2.39878	120.481	0.999364	0.000636491	0.943125	0.056875	TRUE	FALSE
	2	69	1	145.561	-4.34114	59.8218	1.071e-05	0.999989	7.97192e-05	0.99992	FALSE	FALSE
	2	69	2	85.3949	-8.87062	117.867	1.62403e-05	0.999984	0.207276	0.792724	FALSE	FALSE
	2	69	3	114.735	2.39629	87.9138	2.09419e-05	0.999979	0.01029	0.98971	FALSE	FALSE
	2	69	4	20.423	4.5414	133.754	0.0240362	0.975964	0.98355	0.0164502	FALSE	FALSE
	2	69	5	160.924	5.29124	16.6125	2.55742e-06	0.999997	3.10218e-06	0.999997	FALSE	FALSE
	2	69	6	167.55	-1.59635	43.918	3.66202e-06	0.999996	2.11692e-06	0.999998	FALSE	FALSE
	2	69	7	170.665	3.35983	18.0651	7.25737e-06	0.999993	6.83404e-07	0.999999	FALSE	FALSE
	2	69	8	9.28841	-17.0969	137.686	0.996254	0.00374573	0.979142	0.0208581	TRUE	FALSE
	2	69	9	33.975	2.86312	72.8532	0.0136497	0.98635	0.585944	0.414056	FALSE	FALSE
	2	69	10	67.2696	-2.33153	116.016	0.000365082	0.999635	0.478579	0.521421	FALSE	FALSE
	2	69	11	124.688	-0.964602	49.3162	1.10521e-05	0.999989	0.000697199	0.999303	FALSE	FALSE
	2	69	12	9.70167	-4.94949	54.3065	0.999998	2.13507e-06	0.776172	0.223828	TRUE	FALSE
	6	70	1	131.431	1.28094	14.9342	3.32356e-05	0.999967	0.000173414	0.999827	FALSE	FALSE
	6	70	2	98.5759	2.71554	63.3796	4.11995e-05	0.999959	0.0167101	0.98329	FALSE	FALSE
	6	70	3	32.2728	-12.8218	105.243	0.0561964	0.943804	0.883426	0.116574	FALSE	FALSE
	6	70	4	86.3473	-3.75683	69.5545	9.03697e-05	0.99991	0.0495722	0.950428	FALSE	FALSE
	6	70	5	78.1327	-0.35482	66.1709	0.00033987	0.99966	0.0777393	0.922261	FALSE	FALSE
	6	70	6	100.699	2.55573	36.888	7.72199e-05	0.999923	0.00672403	0.993276	FALSE	FALSE
	6	70	7	120.731	-0.714331	50.5594	4.78393e-05	0.999952	0.001113	0.998887	FALSE	FALSE
	6	70	8	12.5991	-3.33833	145.588	0.999989	1.09723e-05	0.957658	0.042342	TRUE	FALSE
	6	70	9	12.2376	-16.4597	135.551	0.999447	0.000552999	0.973907	0.0260934	TRUE	FALSE
	2	71	1	27.2106	-16.0006	103.028	0.00735152	0.992648	0.957822	0.0421783	FALSE	FALSE
	2	71	2	86.8168	-0.256075	89.4654	4.59317e-05	0.999954	0.0848447	0.915155	FALSE	FALSE
	2	71	3	9.08006	-8.89591	246.911	0.99863	0.00137027	0.999934	6.57081e-05	TRUE	FALSE
	2	71	4	36.2139	-12.7474	89.8953	0.0611952	0.938805	0.866728	0.133272	FALSE	FALSE
	2	71	5	11.7651	-20.2686	194.499	0.0248007	0.975199	0.996424	0.00357576	FALSE	FALSE
	2	72	1	41.5509	2.25867	62.3975	0.00046487	0.999535	0.429595	0.570405	FALSE	FALSE
	2	72	2	29.544	-3.6335	191.282	0.00221091	0.997789	0.997442	0.00255833	FALSE	FALSE
	2	72	3	10.7007	-15.2021	167.898	0.999321	0.000678731	0.982242	0.0177581	TRUE	FALSE
	2	72	4	9.78186	-19.9486	166.83	1	4.6065e-07	0.992697	0.00730262	TRUE	FALSE
	2	72	5	15.9918	-13.5381	251.678	0.241929	0.758071	0.999883	0.000116757	FALSE	FALSE
	2	73	1	51.3053	-7.57521	138.729	0.00101322	0.998987	0.808484	0.191516	FALSE	FALSE
	2	73	2	29.9758	4.81077	141.292	0.000665457	0.999335	0.989818	0.0101825	FALSE	FALSE
	2	73	3	38.7893	-31.3329	213.363	0.00242333	0.997577	0.999862	0.000138283	FALSE	FALSE
	2	73	4	12.8963	-22.1898	177.016	0.848019	0.151981	0.996495	0.00350467	TRUE	FALSE
	2	73	5	6.18834	2.60303	18.3883	0.999999	1.11371e-06	0.660663	0.339337	TRUE	FALSE
	2	73	6	8.60119	-17.4308	225.155	0.999951	4.94269e-05	0.998848	0.00115217	TRUE	FALSE
	2	74	1	199.804	-2.21584	77.3714	1.76192e-06	0.999998	1.80945e-06	0.999998	FALSE	FALSE
	2	74	2	69.3872	-5.7661	191.008	2.59856e-05	0.999974	0.984659	0.0153414	FALSE	FALSE
	2	74	3	55.5024	-21.9065	190.587	1.47472e-05	0.999985	0.990777	0.00922267	FALSE	FALSE
	2	74	4	23.9116	-11.3799	214.14	0.0165717	0.983428	0.998156	0.0018439	FALSE	FALSE
	2	74	5	19.2285	-27.0909	168.779	0.0308813	0.969119	0.999314	0.000685942	FALSE	FALSE
	2	74	6	165.223	-13.6666	130.98	1.76888e-06	0.999998	0.000125	0.999875	FALSE	FALSE
	2	74	7	48.7255	1.21868	118.64	2.0842e-05	0.999979	0.81721	0.18279	FALSE	FALSE
	2	74	8	13.468	-20.1609	160.236	0.999383	0.000617319	0.99207	0.0079298	TRUE	FALSE
	0.3	75	1	116.31	-9.06049	164.553	3.27253e-05	0.999967	0.164916	0.835084	FALSE	FALSE
	0.3	75	2	152.658	1.07018	50.2358	1.02952e-05	0.99999	2.12483e-05	0.999979	FALSE	FALSE
	0.3	75	3	100.779	-2.06005	68.3368	0.000107281	0.999893	0.0131226	0.986877	FALSE	FALSE
	0.3	75	4	102.937	11.1673	16.9843	0.000272933	0.999727	0.00797879	0.992021	FALSE	FALSE
	0.3	75	5	166.29	3.10694	4.07517	2.3535e-05	0.999976	1.06667e-06	0.999999	FALSE	FALSE
	0.3	75	6	82.72	-0.309569	64.5546	0.000199165	0.999801	0.0539552	0.946045	FALSE	FALSE
	0.3	75	7	123.474	3.60612	36.6217	0.00087525	0.999125	0.00062924	0.999371	FALSE	FALSE
	0.3	75	8	152.266	-7.76746	105.085	4.24559e-06	0.999996	0.000159592	0.99984	FALSE	FALSE
	0.3	75	9	278.754	-0.00228545	33.6638	1.66552e-07	1	5.23319e-16	1	FALSE	FALSE
	0.3	75	10	244.035	1.50581	10.3792	5.5449e-07	0.999999	6.74523e-13	1	FALSE	FALSE
	0.3	75	11	215.835	-3.2455	43.4558	1.41791e-06	0.999999	6.07736e-10	1	FALSE	FALSE
	0.3	76	1	172.015	-1.98031	30.6641	9.21645e-06	0.999991	8.55413e-07	0.999999	FALSE	FALSE
	0.3	76	2	94.6089	9.0101	75.1003	0.000656216	0.999344	0.129247	0.870753	FALSE	FALSE
	0.3	76	3	133.707	6.75671	67.3493	1.30676e-05	0.999987	0.00108414	0.998916	FALSE	FALSE
	0.3	76	4	143.684	-8.38501	82.6389	1.58442e-06	0.999998	0.000254049	0.999746	FALSE	FALSE
	0.3	76	5	205.599	-5.67141	81.3313	9.58077e-07	0.999999	1.59402e-08	1	FALSE	FALSE
	0.3	76	6	154.644	6.94127	15.7032	5.59907e-06	0.999994	8.54138e-06	0.999991	FALSE	FALSE
	0.3	76	7	228.022	-5.39879	57.9572	3.90853e-07	1	1.01062e-10	1	FALSE	FALSE
	0.3	76	8	78.7598	-12.284	92.3072	2.30143e-05	0.999977	0.311343	0.688657	FALSE	FALSE
	0.3	76	9	233.661	-2.81383	52.9935	6.54357e-07	0.999999	2.43256e-11	1	FALSE	FALSE
	0.3	76	10	85.112	-15.2556	156.076	9.69111e-06	0.99999	0.646656	0.353344	FALSE	FALSE
	0.3	76	11	215.797	0.49722	26.1223	1.51234e-06	0.999998	3.29409e-10	1	FALSE	FALSE
	0.3	76	12	232.996	1.83722	30.2779	1.53526e-07	1	1.27289e-11	1	FALSE	FALSE
	0.3	76	13	154.68	6.09593	119.116	3.79384e-06	0.999996	0.00322236	0.996778	FALSE	FALSE
	0.3	77	1	162.869	0.667889	91.3445	2.20705e-06	0.999998	3.23339e-05	0.999968	FALSE	FALSE
	0.3	77	2	167.39	-2.56135	78.1535	1.00579e-05	0.99999	6.53583e-06	0.999993	FALSE	FALSE
	0.3	77	3	153.631	-10.3191	92.176	3.59834e-05	0.999964	0.000111689	0.999888	FALSE	FALSE
	0.3	77	4	221.43	1.86257	23.9292	6.36734e-07	0.999999	1.03897e-10	1	FALSE	FALSE
	0.3	77	5	86.3079	-7.42041	130.81	8.77189e-05	0.999912	0.27948	0.72052	FALSE	FALSE
	0.3	77	6	104.511	-2.15555	87.0034	0.000476162	0.999524	0.0163016	0.983698	FALSE	FALSE
	0.3	77	7	158.838	-0.665642	23.2909	1.98426e-05	0.99998	5.14594e-06	0.999995	FALSE	FALSE
	0.3	77	8	134.379	3.50232	31.3536	1.16825e-05	0.999988	0.000149518	0.99985	FALSE	FALSE
	0.3	77	9	156.766	-6.23781	53.681	5.4834e-06	0.999995	1.92587e-05	0.999981	FALSE	FALSE
	0.3	77	10	157.974	-2.36484	27.3808	6.82035e-06	0.999993	7.24243e-06	0.999993	FALSE	FALSE
	0.3	77	11	122.978	1.74345	10.5698	4.6706e-05	0.999953	0.000462828	0.999537	FALSE	FALSE
	0.3	77	12	132.385	-0.153172	59.5628	5.38215e-05	0.999946	0.000365249	0.999635	FALSE	FALSE
	0.3	77	13	103.372	-7.8835	73.8286	0.000106853	0.999893	0.0188401	0.98116	FALSE	FALSE
	0.3	77	14	122.791	-6.31657	60.275	0.000113299	0.999887	0.00166384	0.998336	FALSE	FALSE
	0.3	77	15	96.9285	-1.67685	55.635	0.000111482	0.999889	0.0142349	0.985765	FALSE	FALSE
	0.3	77	16	194.032	-2.4934	48.6841	3.64957e-07	1	3.47409e-08	1	FALSE	FALSE
	0.3	77	17	175.828	0.567114	51.3602	3.42464e-06	0.999997	7.37881e-07	0.999999	FALSE	FALSE
	0.3	77	18	159.916	-4.20319	52.8742	1.18834e-05	0.999988	9.44966e-06	0.999991	FALSE	FALSE
	0.3	77	19	252.565	-0.0858835	19.1842	5.23508e-07	0.999999	1.36863e-13	1	FALSE	FALSE
	0.3	77	20	219.715	0.363285	25.0047	8.66601e-07	0.999999	1.50332e-10	1	FALSE	FALSE
	0.3	77	21	179.956	-3.75501	70.6782	1.4072e-06	0.999999	7.30828e-07	0.999999	FALSE	FALSE
	0.3	77	22	177.846	-2.79199	49.7209	5.57952e-06	0.999994	5.24407e-07	0.999999	FALSE	FALSE
	0.3	77	23	242.475	-1.28549	22.4949	4.97354e-07	1	1.43393e-12	1	FALSE	FALSE
	0.3	77	24	197.782	-2.82203	49.421	1.28474e-06	0.999999	1.88081e-08	1	FALSE	FALSE
	0.3	77	25	139.917	-0.0069494	113.536	2.19311e-06	0.999998	0.00206898	0.997931	FALSE	FALSE
	0.2	78	1	112.901	-1.19226	19.8514	0.000292196	0.999708	0.00203711	0.997963	FALSE	FALSE
	0.2	78	2	102.15	-0.563584	41.9904	0.000201549	0.999798	0.00672495	0.993275	FALSE	FALSE
	0.2	78	3	129.774	-2.17953	36.9487	4.7041e-05	0.999953	0.00034328	0.999657	FALSE	FALSE
	0.2	78	4	150.299	-1.67322	40.2712	5.79504e-06	0.999994	2.3846e-05	0.999976	FALSE	FALSE
	0.2	78	5	120.586	-1.9034	79.7247	1.98114e-05	0.99998	0.00257007	0.99743	FALSE	FALSE
	0.2	78	6	139.49	-2.01334	60.7827	3.10002e-05	0.999969	0.000157902	0.999842	FALSE	FALSE
	0.2	78	7	70.5181	0.947057	57.9588	0.00363898	0.996361	0.110048	0.889952	FALSE	FALSE
	0.2	78	8	142.749	2.08549	36.8116	1.6168e-05	0.999984	5.62473e-05	0.999944	FALSE	FALSE
	0.2	78	9	199.787	0.75273	24.6074	2.89343e-06	0.999997	6.12832e-09	1	FALSE	FALSE
	0.2	78	10	57.3792	-4.27738	120.848	0.00128858	0.998711	0.625455	0.374545	FALSE	FALSE
	0.2	78	11	139.445	-2.22297	32.654	1.2526e-05	0.999987	9.74719e-05	0.999903	FALSE	FALSE
	0.2	78	12	100.834	-2.01189	49.5366	0.00015452	0.999845	0.00921196	0.990788	FALSE	FALSE
	0.2	78	13	103.363	6.39172	10.0199	8.07214e-05	0.999919	0.00373351	0.996266	FALSE	FALSE
	0.2	78	14	111.216	2.35457	96.8821	5.82878e-06	0.999994	0.0231792	0.976821	FALSE	FALSE
	0.2	78	15	152.987	0.68232	63.592	3.0904e-06	0.999997	3.20194e-05	0.999968	FALSE	FALSE
	0.2	78	16	107.66	-4.85971	80.8861	8.23685e-05	0.999918	0.0102797	0.98972	FALSE	FALSE
	0.2	78	17	127.526	1.72354	22.6852	3.10896e-05	0.999969	0.000295045	0.999705	FALSE	FALSE
	0.2	78	18	81.1947	-9.66751	117.646	2.9239e-05	0.999971	0.273553	0.726447	FALSE	FALSE
	0.2	79	1	85.9841	0.642423	23.2567	0.000379208	0.999621	0.0240645	0.975935	FALSE	FALSE
	0.2	79	2	154.834	2.52365	133.641	9.40787e-06	0.999991	0.00323717	0.996763	FALSE	FALSE
	0.2	79	3	165.649	-2.14577	45.9004	1.02092e-06	0.999999	3.02563e-06	0.999997	FALSE	FALSE
	0.2	79	4	214.99	4.13168	56.9545	5.7037e-07	0.999999	1.8538e-09	1	FALSE	FALSE
	0.2	79	5	200.108	-0.236727	60.6865	3.46513e-06	0.999997	1.90487e-08	1	FALSE	FALSE
	0.2	79	6	94.2779	-4.64336	166.647	4.14716e-05	0.999959	0.723172	0.276828	FALSE	FALSE
	0.2	79	7	146.199	-11.6207	89.497	1.56919e-06	0.999998	0.000354134	0.999646	FALSE	FALSE
	0.2	79	8	177.364	-4.16374	36.922	3.98347e-06	0.999996	5.07324e-07	0.999999	FALSE	FALSE
	0.2	79	9	155.272	4.76028	71.8556	3.42941e-06	0.999997	6.17574e-05	0.999938	FALSE	FALSE
	0.2	79	10	152.977	-1.54585	63.4389	4.72057e-06	0.999995	2.9264e-05	0.999971	FALSE	FALSE
	0.2	79	11	154.719	5.48809	36.1864	9.34027e-06	0.999991	1.40556e-05	0.999986	FALSE	FALSE
	0.2	79	12	204.3	-0.681913	37.6465	1.95724e-06	0.999998	3.93794e-09	1	FALSE	FALSE
	0.2	79	13	181.054	3.59258	27.863	1.08274e-06	0.999999	1.71411e-07	1	FALSE	FALSE
	0.2	79	14	166.086	-4.77656	48.3078	2.46267e-06	0.999998	3.73429e-06	0.999996	FALSE	FALSE
	3	80	1	184.558	4.50683	111.514	1.15407e-05	0.999988	1.60055e-05	0.999984	FALSE	FALSE
	3	80	2	153.387	-20.7226	149.046	1.88402e-06	0.999998	0.00437181	0.995628	FALSE	FALSE
	3	80	3	13.966	-13.2053	196.301	0.999383	0.000617113	0.993927	0.0060734	TRUE	FALSE
	3	80	4	8.91774	-24.0374	258.848	1	3.59153e-07	0.999896	0.00010436	TRUE	FALSE
	3	81	1	55.7501	-17.2791	172.493	0.00782008	0.99218	0.960673	0.039327	FALSE	FALSE
	3	81	2	48.3574	-23.3962	167.297	0.00360642	0.996394	0.992398	0.00760167	FALSE	FALSE
	3	81	3	44.6091	-14.6793	139.178	0.00985236	0.990148	0.91061	0.0893897	FALSE	FALSE
	3	81	4	27.7065	-15.0369	127.584	0.0240492	0.975951	0.944498	0.0555021	FALSE	FALSE
	3	81	5	8.13631	-5.69564	154.365	1	2.59786e-08	0.965589	0.0344111	TRUE	FALSE
	3	82	1	136.671	-1.88151	34.8027	1.67263e-05	0.999983	0.000137592	0.999862	FALSE	FALSE
	3	82	2	87.0091	-12.4292	156.893	0.000279275	0.999721	0.565343	0.434657	FALSE	FALSE
	3	82	3	221.588	-6.1534	48.1073	1.14504e-06	0.999999	2.99139e-10	1	FALSE	FALSE
	3	82	4	18.95	-39.0803	289.862	0.989302	0.0106984	1	4.99277e-07	TRUE	FALSE
	3	82	5	29.7218	-32.395	275.255	2.65507e-05	0.999973	0.99999	1.01641e-05	FALSE	FALSE
	3	82	6	23.0332	-21.6535	262.58	0.0125018	0.987498	0.999906	9.36758e-05	FALSE	FALSE
	3	82	7	189.42	-6.42642	90.7457	1.24283e-06	0.999999	3.70991e-07	1	FALSE	FALSE
	3	82	8	116.949	-13.5206	139.871	6.84067e-06	0.999993	0.0514856	0.948514	FALSE	FALSE
	3	82	9	9.59233	-7.21304	149.875	1	2.36437e-07	0.95315	0.0468499	TRUE	FALSE
	3	83	1	84.0052	-4.09476	171.369	1.00141e-05	0.99999	0.89412	0.10588	FALSE	FALSE
	3	83	2	36.4008	-16.111	207.531	0.000843897	0.999156	0.995516	0.00448355	FALSE	FALSE
	3	83	3	17.4744	-15.0976	195.247	0.0335012	0.966499	0.993532	0.00646847	FALSE	FALSE
	3	83	4	13.4907	-1.65921	168.265	0.999861	0.000138789	0.992232	0.00776777	TRUE	FALSE
	3	83	5	28.5817	-8.70957	214.668	0.019025	0.980975	0.998795	0.00120547	FALSE	FALSE
	3	83	6	6.78044	-13.4888	201.243	0.999999	5.56478e-07	0.99545	0.00454961	TRUE	FALSE
	0.5	84	1	84.2552	2.96739	52.6467	0.00059814	0.999402	0.0405338	0.959466	FALSE	FALSE
	0.5	84	2	109.915	3.49131	45.4076	5.26218e-05	0.999947	0.0034315	0.996569	FALSE	FALSE
	0.5	84	3	47.5911	-5.24842	161.704	0.000608663	0.999391	0.952594	0.0474063	FALSE	FALSE
	0.5	84	4	84.8996	-13.7166	157.479	0.000208726	0.999791	0.626562	0.373438	FALSE	FALSE
	0.5	84	5	208.563	-1.45485	82.5344	1.05069e-06	0.999999	1.15702e-08	1	FALSE	FALSE
	0.5	84	6	129.392	-6.41825	61.5442	1.05978e-05	0.999989	0.000792075	0.999208	FALSE	FALSE
	0.5	84	7	155.357	-5.36592	55.5694	4.64355e-06	0.999995	2.1512e-05	0.999978	FALSE	FALSE
	0.5	84	8	149.119	-1.4305	44.0903	2.69568e-05	0.999973	2.96704e-05	0.99997	FALSE	FALSE
	0.5	84	9	24.5972	-17.2553	195.746	0.011586	0.988414	0.993949	0.00605086	FALSE	FALSE
	0.5	84	10	55.6193	-9.85929	90.8719	0.00273076	0.997269	0.556573	0.443427	FALSE	FALSE
	0.5	84	11	50.6985	-18.7126	127.645	6.75676e-05	0.999932	0.948878	0.0511221	FALSE	FALSE
	0.5	84	12	123.186	-5.25354	98.8817	1.1809e-05	0.999988	0.00375896	0.996241	FALSE	FALSE
	0.5	84	13	18.6457	-13.4009	129.481	0.998803	0.00119675	0.939991	0.0600088	TRUE	FALSE
	0.5	84	14	55.3467	-15.3249	110.487	0.00167126	0.998329	0.833378	0.166622	FALSE	FALSE
	0.5	84	15	63.2476	-25.6168	198.567	0.0005103	0.99949	0.995947	0.00405331	FALSE	FALSE
	0.5	85	1	37.1127	-8.32823	127.378	0.000291407	0.999709	0.885985	0.114015	FALSE	FALSE
	0.5	85	2	171.619	-5.06635	116.68	1.75518e-06	0.999998	2.12364e-05	0.999979	FALSE	FALSE
	0.5	85	3	210.761	6.04387	43.964	1.77421e-06	0.999998	2.76675e-09	1	FALSE	FALSE
	0.5	85	4	111.193	-3.54247	101.394	2.53895e-05	0.999975	0.0144666	0.985533	FALSE	FALSE
	0.5	85	5	114.765	-0.296961	106.971	6.27834e-05	0.999937	0.018585	0.981415	FALSE	FALSE
	0.5	85	6	148.406	-3.29061	33.3204	2.03579e-05	0.99998	3.33944e-05	0.999967	FALSE	FALSE
	0.5	85	7	134.163	-1.47452	44.5184	1.81627e-05	0.999982	0.000209667	0.99979	FALSE	FALSE
	0.5	85	8	80.9166	-12.7838	116.058	0.000105835	0.999894	0.359927	0.640073	FALSE	FALSE
	0.5	85	9	36.2642	-22.1333	150.535	0.0219292	0.978071	0.991715	0.00828476	FALSE	FALSE
	0.5	85	10	84.1816	1.06258	102.378	8.38437e-06	0.999992	0.194866	0.805134	FALSE	FALSE
	0.5	85	11	16.1961	-19.2551	227.218	0.999996	3.67494e-06	0.999029	0.000970788	TRUE	FALSE
	0.5	86	1	134.748	-3.63001	71.5491	1.63597e-05	0.999984	0.000397468	0.999603	FALSE	FALSE
	0.5	86	2	110.847	-12.2226	159.036	1.06375e-05	0.999989	0.17396	0.82604	FALSE	FALSE
	0.5	86	3	176.34	2.70816	59.2932	3.13086e-06	0.999997	1.12769e-06	0.999999	FALSE	FALSE
	0.5	86	4	101.648	-9.52827	98.3945	2.64801e-05	0.999974	0.0408313	0.959169	FALSE	FALSE
	0.5	86	5	145.12	-1.40303	55.7879	3.74069e-06	0.999996	6.64158e-05	0.999934	FALSE	FALSE
	0.5	86	6	38.4096	-8.58752	190.359	0.000784138	0.999216	0.991051	0.00894904	FALSE	FALSE
	0.5	86	7	26.9523	-18.7397	139.298	0.0171144	0.982886	0.980735	0.0192648	FALSE	FALSE
	0.5	86	8	44.2452	-17.1242	154.073	0.012761	0.987239	0.957962	0.042038	FALSE	FALSE
	0.5	86	9	42.266	-6.86158	182.043	0.00196312	0.998037	0.986365	0.0136353	FALSE	FALSE
	0.5	86	10	21.4894	-14.675	175.775	0.00978981	0.99021	0.983567	0.0164334	FALSE	FALSE
	0.5	86	11	40.476	-24.1892	173.03	0.00173049	0.99827	0.996056	0.00394407	FALSE	FALSE
	0.5	86	12	14.2312	-25.15	244.509	0.999933	6.71784e-05	0.999802	0.000198371	TRUE	FALSE
	0.5	87	1	211.708	-10.3496	83.8937	1.01739e-06	0.999999	8.66567e-09	1	FALSE	FALSE
	0.5	87	2	188.126	-6.73254	56.9171	1.87596e-06	0.999998	1.68006e-07	1	FALSE	FALSE
	0.5	87	3	155.615	-14.7877	115.052	8.6815e-06	0.999991	0.000328668	0.999671	FALSE	FALSE
	0.5	87	4	173.016	5.80347	59.3551	3.51263e-06	0.999996	3.11865e-06	0.999997	FALSE	FALSE
	0.5	87	5	157.457	4.47643	11.648	7.43648e-06	0.999993	4.47268e-06	0.999996	FALSE	FALSE
	0.5	87	6	110.476	-7.4842	153.097	9.55672e-06	0.99999	0.154621	0.845379	FALSE	FALSE
	0.5	87	7	7.33077	-22.9407	186.939	0.999996	4.18979e-06	0.997752	0.0022481	TRUE	FALSE
	5	88	1	34.8355	-20.732	175.926	0.121504	0.878496	0.99154	0.00845986	FALSE	FALSE
	5	88	2	141.817	-12.2899	109.454	4.3174e-06	0.999996	0.00108096	0.998919	FALSE	FALSE
	5	88	3	51.684	-3.18043	191.385	0.000913753	0.999086	0.996255	0.00374465	FALSE	FALSE
	5	88	4	6.37129	-19.5699	224.824	0.999997	2.9025e-06	0.998934	0.00106594	TRUE	FALSE
	5	88	5	10.7785	-6.16983	206.876	0.999945	5.53467e-05	0.998807	0.00119258	TRUE	FALSE
	5	89	1	25.0793	-9.01578	157.458	0.00556341	0.994437	0.955891	0.044109	FALSE	FALSE
	5	89	2	28.7244	-20.2689	159.688	0.00648853	0.993511	0.989201	0.010799	FALSE	FALSE
	5	89	3	46.3065	-22.7843	173.126	0.00129356	0.998706	0.992262	0.00773771	FALSE	FALSE
	5	89	4	17.3964	-32.0425	226.093	0.0326234	0.967377	0.999948	5.15179e-05	FALSE	FALSE
	5	89	5	12.3377	-17.749	200.249	0.00739641	0.992604	0.995884	0.00411622	FALSE	FALSE
	5	89	6	18.6036	-33.4814	224.871	0.0135303	0.98647	0.999971	2.86559e-05	FALSE	FALSE
	5	89	7	27.6783	-26.9726	216.313	0.0460415	0.953958	0.99954	0.000460369	FALSE	FALSE
	5	89	8	24.161	-36.679	225.671	0.004479	0.995521	0.999994	6.44193e-06	FALSE	FALSE
	5	89	9	30.2525	-29.7206	196.225	0.0056921	0.994308	0.999737	0.000263051	FALSE	FALSE
	5	89	10	31.3227	-27.5816	213.024	0.0264429	0.973557	0.999547	0.00045253	FALSE	FALSE
	5	89	11	35.0841	-36.9537	252.928	0.00101861	0.998981	0.999995	4.88561e-06	FALSE	FALSE
	5	89	12	10.4415	-19.8667	244.026	1	4.80914e-07	0.999661	0.000339333	TRUE	FALSE
	5	90	1	40.766	1.04362	140.458	0.000167106	0.999833	0.94349	0.0565098	FALSE	FALSE
	5	90	2	44.3994	-15.4405	268.045	9.50713e-05	0.999905	0.999956	4.43747e-05	FALSE	FALSE
	5	90	3	48.5937	-18.9065	311.046	4.27512e-05	0.999957	0.999999	9.45592e-07	FALSE	FALSE
	5	90	4	92.0576	-13.1074	186.144	6.94491e-06	0.999993	0.819662	0.180338	FALSE	FALSE
	5	90	5	155.76	-1.99242	96.5097	5.3519e-06	0.999995	8.0081e-05	0.99992	FALSE	FALSE
	5	90	6	135.576	-4.05306	130.52	2.63621e-06	0.999997	0.00525592	0.994744	FALSE	FALSE
	5	90	7	8.97693	-8.22711	183.384	0.995313	0.00468674	0.990865	0.00913525	TRUE	FALSE
	5	90	8	6.74748	-30.7083	270.012	0.999996	3.95114e-06	0.999982	1.8207e-05	TRUE	FALSE
	5	91	1	256.735	-2.53935	91.3595	1.98006e-07	1	1.45504e-12	1	FALSE	FALSE
	5	91	2	219.57	-7.46317	66.4403	3.17421e-07	1	8.23892e-10	1	FALSE	FALSE
	5	91	3	219.225	-11.2425	72.9941	1.07641e-06	0.999999	1.86747e-09	1	FALSE	FALSE
	5	91	4	155.225	-11.0161	85.7561	3.10656e-06	0.999997	8.79267e-05	0.999912	FALSE	FALSE
	5	91	5	17.025	-22.0143	197.466	0.936008	0.0639922	0.99758	0.00241961	TRUE	FALSE
	5	91	6	24.3186	-20.3197	180.896	0.0113169	0.988683	0.993698	0.0063022	FALSE	FALSE
	5	91	7	27.0228	-33.111	222.522	0.0251036	0.974896	0.999959	4.07261e-05	FALSE	FALSE
	5	91	8	6.20633	-25.042	249.684	1	3.23188e-07	0.999844	0.000155715	TRUE	FALSE
	6	92	1	151.994	-1.18365	106.558	1.26054e-06	0.999999	0.000253195	0.999747	FALSE	FALSE
	6	92	2	40.3525	-9.1811	219.915	0.00359544	0.996405	0.998965	0.00103499	FALSE	FALSE
	6	92	3	61.4894	-23.1697	165.919	0.00243144	0.997569	0.984187	0.0158128	FALSE	FALSE
	6	92	4	46.8501	-23.2649	186.965	0.00468763	0.995312	0.994871	0.00512905	FALSE	FALSE
	6	92	5	6.37358	-8.66432	236.204	1	3.60271e-07	0.999824	0.000175969	TRUE	FALSE
	6	93	1	128.726	-4.5177	177.278	1.87937e-05	0.999981	0.264732	0.735268	FALSE	FALSE
	6	93	2	246.613	-11.226	85.3579	5.94561e-08	1	1.05948e-11	1	FALSE	FALSE
	6	93	3	9.521	-18.5715	226.686	0.999765	0.000234709	0.998982	0.00101816	TRUE	FALSE
	6	93	4	11.6916	-8.20361	171.25	0.999998	1.78377e-06	0.981639	0.0183608	TRUE	FALSE
	6	94	1	68.9838	-8.87841	90.2699	0.00095466	0.999045	0.314857	0.685143	FALSE	FALSE
	6	94	2	44.7431	-5.8773	84.0524	0.0069569	0.993043	0.537985	0.462015	FALSE	FALSE
	6	94	3	23.4195	-22.4651	279.824	0.241473	0.758527	0.999975	2.48574e-05	FALSE	FALSE
	6	94	4	9.88081	-4.29778	168.724	0.999998	2.15537e-06	0.987069	0.0129311	TRUE	FALSE
	6	94	5	6.80105	-20.0074	215.11	0.999984	1.64707e-05	0.99836	0.00163973	TRUE	FALSE
	1	95	1	69.754	-14.5294	169.605	0.000100997	0.999899	0.887297	0.112703	FALSE	FALSE
	1	95	2	100.789	-11.3985	134.747	9.41299e-06	0.999991	0.140233	0.859767	FALSE	FALSE
	1	95	3	192.951	-17.3459	177	1.16903e-06	0.999999	3.28568e-05	0.999967	FALSE	FALSE
	1	95	4	61.7064	-20.4299	233.465	0.000771775	0.999228	0.998215	0.00178502	FALSE	FALSE
	1	95	5	44.2261	-26.8222	228.328	0.000218654	0.999781	0.999515	0.000485401	FALSE	FALSE
	1	95	6	83.0825	-14.0802	111.668	4.57532e-05	0.999954	0.367394	0.632606	FALSE	FALSE
	1	95	7	9.6399	-18.9301	212.156	1	2.96676e-08	0.997883	0.00211694	TRUE	FALSE
	1	96	1	124.714	4.6239	73.1478	1.83744e-05	0.999982	0.0025587	0.997441	FALSE	FALSE
	1	96	2	108.415	-3.20798	36.3854	0.000124855	0.999875	0.00441243	0.995588	FALSE	FALSE
	1	96	3	10.8004	-10.8913	87.9933	0.999999	7.7131e-07	0.902807	0.097193	TRUE	FALSE
	1	97	1	240.105	-1.37927	46.4227	3.65061e-07	1	5.00538e-12	1	FALSE	FALSE
	1	97	2	204.719	-2.31654	58.0162	7.4211e-07	0.999999	7.1977e-09	1	FALSE	FALSE
	1	97	3	147.405	-6.75133	62.2026	6.98515e-06	0.999993	8.544e-05	0.999915	FALSE	FALSE
	1	97	4	12.1593	-34.1977	253.635	0.999999	6.00972e-07	0.999989	1.1065e-05	TRUE	FALSE
	1	97	5	51.3084	10.9594	8.22969	0.000276651	0.999723	0.262068	0.737932	FALSE	FALSE
	1	98	1	122.181	-19.918	153.866	2.54397e-06	0.999997	0.135566	0.864434	FALSE	FALSE
	1	98	2	198.528	-14.7088	107.642	5.4977e-07	0.999999	3.78063e-07	1	FALSE	FALSE
	1	98	3	42.1132	-28.6159	211.749	0.0121772	0.987823	0.999549	0.000450732	FALSE	FALSE
	1	98	4	54.7258	-31.8967	220.073	0.0189121	0.981088	0.999824	0.000176153	FALSE	FALSE
	1	98	5	205.734	-7.66235	59.7858	4.6435e-07	1	9.41338e-09	1	FALSE	FALSE
	1	98	6	188.758	-4.28432	76.8155	1.68171e-06	0.999998	2.26278e-07	1	FALSE	FALSE
	1	98	7	180.676	-4.19019	62.9096	3.20053e-05	0.999968	5.15307e-07	0.999999	FALSE	FALSE
	1	98	8	126.275	7.68482	22.1673	6.19298e-06	0.999994	0.000439826	0.99956	FALSE	FALSE
	1	98	9	163.272	-4.66004	53.0042	6.75106e-06	0.999993	6.07375e-06	0.999994	FALSE	FALSE
	1	98	10	85.068	-11.0451	97.77	6.41081e-05	0.999936	0.18243	0.81757	FALSE	FALSE
	1	98	11	152.411	0.285962	66.9283	4.25967e-06	0.999996	3.84214e-05	0.999962	FALSE	FALSE
	1	98	12	140.138	-10.5586	108.104	8.18492e-06	0.999992	0.00101246	0.998988	FALSE	FALSE
	1	98	13	18.7818	-32.0354	274.006	0.999989	1.10122e-05	0.999989	1.07307e-05	TRUE	FALSE
	10	99	1	12.278	-19.5795	176.784	0.999216	0.000784357	0.993243	0.00675654	TRUE	FALSE
	10	99	2	0.327666	-12.1231	191.831	0.999995	5.03065e-06	0.992536	0.00746439	TRUE	FALSE
	10	99	3	5.18514	-19.0843	189.849	0.999837	0.000163377	0.995076	0.00492438	TRUE	FALSE
	10	100	1	83.4435	-3.144	27.0289	0.000231751	0.999768	0.589303	0.410697	FALSE	FALSE
	10	100	2	11.511	-29.3399	253.133	0.999921	7.92195e-05	0.999946	5.43611e-05	TRUE	FALSE
	10	100	3	19.5875	-22.1319	175.986	0.9795	0.0205003	0.995968	0.00403236	TRUE	FALSE
	10	100	4	8.8151	-26.6735	243.217	0.999998	1.7982e-06	0.999844	0.00015567	TRUE	FALSE
	10	101	1	88.8397	11.0064	20.0381	5.14017e-06	0.999995	0.493031	0.506969	FALSE	FALSE
	10	101	2	36.7854	-13.949	121.805	0.00571586	0.994284	0.901994	0.0980063	FALSE	FALSE
	10	101	3	52.8479	-9.18193	76.9456	0.00331861	0.996681	0.550971	0.449029	FALSE	FALSE
	10	101	4	8.61256	-4.10389	156.579	1	4.56228e-08	0.974429	0.0255705	TRUE	FALSE
	10	102	1	101.837	-15.0694	107.356	9.21125e-05	0.999908	0.124269	0.875731	FALSE	FALSE
	10	102	2	47.3171	-13.8568	189.913	0.00672537	0.993275	0.983169	0.0168308	FALSE	FALSE
	10	102	3	54.9125	-22.557	196.583	0.000497867	0.999502	0.993627	0.00637278	FALSE	FALSE
	10	102	4	102.033	-8.18338	71.0598	8.71708e-06	0.999991	0.0219168	0.978083	FALSE	FALSE
	10	102	5	62.9663	-10.2736	132.767	0.00123503	0.998765	0.669547	0.330453	FALSE	FALSE
	10	102	6	10.4298	-12.2383	121.05	0.99994	6.00436e-05	0.930478	0.0695225	TRUE	FALSE
	2	103	1	79.0878	-10.2713	108.708	0.000739155	0.999261	0.665114	0.334886	FALSE	FALSE
	2	103	2	41.9991	-7.11954	187.404	0.00207477	0.997925	0.99034	0.00966045	FALSE	FALSE
	2	103	3	36.4372	-18.1152	146.359	0.0282999	0.9717	0.971015	0.0289851	FALSE	FALSE
	2	103	4	41.6939	-27.8601	204.428	0.0141571	0.985843	0.999318	0.000681956	FALSE	FALSE
	2	103	5	11.4485	-32.9667	279.307	0.999983	1.67496e-05	0.999994	6.36945e-06	TRUE	FALSE
	2	103	6	23.6491	-17.5644	131.125	0.0381252	0.961875	0.974458	0.0255423	TRUE	FALSE
	2	103	7	45.4648	-2.80612	80.8775	0.00694726	0.993053	0.466227	0.533773	FALSE	FALSE
	2	103	8	44.6564	-21.8882	140.054	0.00413595	0.995864	0.987045	0.0129545	FALSE	FALSE
	2	103	9	33.6504	-21.3919	146.418	0.00957394	0.990426	0.990084	0.00991625	FALSE	FALSE
	2	103	10	10.536	-13.9793	173.704	0.999967	3.2607e-05	0.983568	0.0164324	TRUE	FALSE
	2	103	11	34.8732	-21.2241	139.359	0.0388316	0.961168	0.988917	0.0110828	FALSE	FALSE
	2	103	12	28.6172	-21.1011	153.932	0.095795	0.904205	0.991066	0.0089335	FALSE	FALSE
	2	104	1	98.7797	-7.41731	60.9876	1.19633e-05	0.999988	0.330678	0.669322	FALSE	FALSE
	2	104	2	32.1576	-11.0316	200.114	0.13537	0.86463	0.994652	0.00534838	FALSE	FALSE
	2	104	3	11.4485	-18.0897	187.479	0.999948	5.2321e-05	0.993552	0.00644805	TRUE	FALSE
	2	104	4	77.8884	-10.5902	153.808	2.85761e-05	0.999971	0.664815	0.335185	FALSE	FALSE
	2	104	5	22.8855	-29.6751	205.461	0.00648492	0.993515	0.999796	0.000203904	FALSE	FALSE
	2	104	6	39.5658	-16.5331	169.212	0.0189968	0.981003	0.973778	0.0262216	FALSE	FALSE
	2	104	7	31.3158	-22.4675	143.843	0.00840077	0.991599	0.993814	0.00618639	FALSE	FALSE
	2	104	8	29.6206	-24.5419	169.386	0.0268952	0.973105	0.997478	0.00252161	FALSE	FALSE
	2	104	9	19.8121	-22.8314	196.862	0.45938	0.54062	0.997882	0.00211819	TRUE	FALSE
	2	104	10	10.5313	-25.4581	204.098	0.99996	4.04146e-05	0.999224	0.00077645	TRUE	FALSE
	1	105	1	118.786	6.05942	8.02354	6.72407e-05	0.999933	0.0175727	0.982427	FALSE	FALSE
	1	105	2	140.204	-2.93099	68.0336	2.04098e-05	0.99998	0.00018026	0.99982	FALSE	FALSE
	1	105	3	33.7936	-15.2709	178.493	0.244171	0.755829	0.981786	0.0182142	FALSE	FALSE
	1	105	4	19.7765	4.53245	150.15	0.00162998	0.99837	0.99519	0.0048101	FALSE	FALSE
	1	105	5	153.351	1.05852	49.0078	1.3101e-05	0.999987	1.85794e-05	0.999981	FALSE	FALSE
	1	105	6	166.209	-2.89049	31.2578	1.64601e-05	0.999984	2.3334e-06	0.999998	FALSE	FALSE
	1	105	7	82.9899	-4.09284	111.111	0.000155913	0.999844	0.188769	0.811231	FALSE	FALSE
	1	105	8	14.6621	-2.75732	172.173	0.827168	0.172832	0.992309	0.00769126	FALSE	FALSE
	1	105	9	8.22745	10.4799	116.967	0.999997	2.95153e-06	0.994498	0.00550174	TRUE	FALSE
	1	106	1	51.0343	-2.87492	92.8114	0.00110926	0.998891	0.470649	0.529351	FALSE	FALSE
	1	106	2	20.9877	7.18718	72.2463	0.0282129	0.971787	0.800115	0.199885	FALSE	FALSE
	1	106	3	58.9017	-4.51371	78.7286	0.00182973	0.99817	0.309647	0.690353	FALSE	FALSE
	1	106	4	36.1106	-9.67765	81.07	0.104947	0.895053	0.758683	0.241317	FALSE	FALSE
	1	106	5	12.1077	6.82067	112.051	0.997964	0.00203587	0.969995	0.0300053	TRUE	FALSE
	1	106	6	29.5298	-9.17419	126.492	0.00800265	0.991997	0.865064	0.134936	FALSE	FALSE
	1	106	7	51.1119	0.725641	104.818	5.84814e-05	0.999942	0.645849	0.354151	FALSE	FALSE
	1	106	8	12.4539	-7.99818	119.875	0.999808	0.000192154	0.880901	0.119099	TRUE	FALSE
	1	107	1	64.3137	-0.806331	66.2483	0.00111157	0.998888	0.180464	0.819536	FALSE	FALSE
	1	107	2	19.3748	-16.1272	113.984	0.139276	0.860724	0.965599	0.0344009	FALSE	FALSE
	1	107	3	100.047	-2.21463	112.685	2.32572e-05	0.999977	0.0706213	0.929379	FALSE	FALSE
	1	107	4	14.509	-17.7598	181.188	0.945432	0.0545685	0.991406	0.00859356	TRUE	FALSE
	1	107	5	8.2963	-1.81419	113.321	0.986214	0.0137864	0.868592	0.131408	TRUE	FALSE
	1	107	6	17.5167	-21.9851	148.313	0.844202	0.155798	0.994932	0.00506841	TRUE	FALSE
	1	107	7	10.0959	-22.5224	153.902	1	2.70881e-07	0.996372	0.00362807	TRUE	FALSE
	1	108	1	132.551	4.95792	49.6591	1.71665e-06	0.999998	0.00615406	0.993846	FALSE	FALSE
	1	108	2	90.5072	-3.81191	39.8235	9.51235e-05	0.999905	0.0276347	0.972365	FALSE	FALSE
	1	108	3	37.7444	-3.69861	131.08	0.000923514	0.999076	0.861371	0.138629	FALSE	FALSE
	1	108	4	129.207	-14.6267	151.541	6.85911e-06	0.999993	0.0270812	0.972919	FALSE	FALSE
	1	108	5	122.914	-1.09218	31.3268	2.97397e-05	0.99997	0.000668656	0.999331	FALSE	FALSE
	1	108	6	72.4529	-10.5716	151.557	0.0793024	0.920698	0.713866	0.286134	FALSE	FALSE
	1	108	7	22.4093	2.99388	170.61	0.590989	0.409011	0.998435	0.00156531	FALSE	FALSE
	1	108	8	35.3194	-11.9347	94.2789	0.0368312	0.963169	0.843242	0.156758	FALSE	FALSE
	1	108	9	71.2961	-2.5069	137.468	7.73704e-05	0.999923	0.694063	0.305937	FALSE	FALSE
	1	108	10	13.208	-18.4292	161.403	0.999727	0.000272595	0.987912	0.0120881	TRUE	FALSE
	0	109	1	193.818	-2.47144	53.102	1.38569e-06	0.999999	4.09959e-08	1	FALSE	TRUE
	0	109	2	136.736	-8.5112	114.119	1.39923e-06	0.999999	0.00160891	0.998391	FALSE	TRUE
	0	109	3	131.237	-6.49196	88.2086	0.000136541	0.999863	0.00111687	0.998883	FALSE	TRUE
	0	109	4	100.302	1.39236	101.955	2.45414e-05	0.999975	0.0657208	0.934279	FALSE	TRUE
	0	109	5	179.578	1.13949	21.3317	3.66156e-06	0.999996	1.79595e-07	1	FALSE	TRUE
	0	109	6	103.446	-4.34824	46.7577	4.08221e-05	0.999959	0.00895107	0.991049	FALSE	TRUE
	0	109	7	136.948	-0.346588	23.6334	3.49563e-05	0.999965	0.000103926	0.999896	FALSE	TRUE
	0	109	8	146.686	2.30443	8.7356	3.02392e-05	0.99997	2.06088e-05	0.999979	FALSE	TRUE
	0	109	9	118.05	1.8849	52.4955	8.29466e-05	0.999917	0.0016266	0.998373	FALSE	TRUE
	0	109	10	138.415	-1.81133	30.9287	3.83687e-05	0.999962	0.000105089	0.999895	FALSE	TRUE
	0	110	1	88.665	-5.54533	133.207	3.11016e-05	0.999969	0.285092	0.714908	FALSE	TRUE
	0	110	2	63.0722	-7.15554	138.225	0.000577076	0.999423	0.70254	0.29746	FALSE	TRUE
	0	110	3	158.352	-2.32351	73.0357	2.40032e-06	0.999998	1.93688e-05	0.999981	FALSE	TRUE
	0	110	4	210.383	-1.69402	62.7302	7.95677e-07	0.999999	3.1493e-09	1	FALSE	TRUE
	0	110	5	95.8644	-10.0419	110.067	2.64326e-05	0.999974	0.0906473	0.909353	FALSE	TRUE
	0	110	6	138.021	-0.886848	45.2442	2.8059e-05	0.999972	0.000127536	0.999872	FALSE	TRUE
	0	110	7	160.546	1.5641	40.1004	5.06175e-06	0.999995	5.24675e-06	0.999995	FALSE	TRUE
	0	110	8	133.746	-12.298	97.7667	6.15621e-06	0.999994	0.00221306	0.997787	FALSE	TRUE
	0	110	9	78.6144	-3.99708	111.638	1.46455e-05	0.999985	0.24545	0.75455	FALSE	TRUE
	0	110	10	77.6772	-3.13011	88.3615	0.000834832	0.999165	0.134251	0.865749	FALSE	TRUE
	0	110	11	90.47	-1.08779	81.8096	4.98057e-05	0.99995	0.0469919	0.953008	FALSE	TRUE
	0	110	12	60.1333	-2.50536	76.2231	0.0141533	0.985847	0.264567	0.735433	FALSE	TRUE
	0	110	13	206.571	4.57064	13.3131	1.5667e-06	0.999998	1.40186e-09	1	FALSE	TRUE
	0	110	14	181.213	3.27648	15.0318	4.89461e-06	0.999995	1.17923e-07	1	FALSE	TRUE
	0	110	15	155.073	-3.25575	55.4417	8.6234e-06	0.999991	1.84258e-05	0.999982	FALSE	TRUE
	0	110	16	135.222	-2.76266	44.3676	3.60225e-05	0.999964	0.000201642	0.999798	FALSE	TRUE
	0	111	1	107.021	2.98632	78.8765	7.00145e-05	0.99993	0.0150935	0.984906	FALSE	TRUE
	0	111	2	73.6338	-23.2233	177.396	7.75673e-06	0.999992	0.974998	0.0250018	FALSE	TRUE
	0	111	3	113.688	2.74543	75.0211	0.00054519	0.999455	0.00643708	0.993563	FALSE	TRUE
	0	111	4	135.719	-0.838397	90.4708	1.68951e-05	0.999983	0.000798169	0.999202	FALSE	TRUE
	0	111	5	114.03	-1.96899	103.168	0.000272012	0.999728	0.0133358	0.986664	FALSE	TRUE
	0	111	6	188.359	4.52309	32.603	2.92824e-06	0.999997	6.53227e-08	1	FALSE	TRUE
	0	111	7	74.9654	2.31062	73.2858	0.000175897	0.999824	0.132766	0.867234	FALSE	TRUE
	0	111	8	143.859	-2.54579	37.4793	1.8945e-05	0.999981	5.9094e-05	0.999941	FALSE	TRUE
	0	111	9	135.152	-1.83582	43.4914	6.074e-05	0.999939	0.000186401	0.999814	FALSE	TRUE
	0	112	1	138.305	6.86004	75.2796	1.00583e-05	0.99999	0.00104234	0.998958	FALSE	TRUE
	0	112	2	58.2128	-12.0846	97.815	0.000741832	0.999258	0.640596	0.359404	FALSE	TRUE
	0	112	3	128.103	1.45176	29.0348	6.46688e-05	0.999935	0.000302872	0.999697	FALSE	TRUE
	0	112	4	131.875	0.48592	37.6857	1.48988e-05	0.999985	0.000227166	0.999773	FALSE	TRUE
	0	112	5	120.975	-5.55229	51.1837	1.04781e-05	0.99999	0.00168366	0.998316	FALSE	TRUE
	0	112	6	104.702	-0.163358	61.9146	4.67543e-05	0.999953	0.00770495	0.992295	FALSE	TRUE
	0	112	7	127.248	0.281446	31.5926	3.1505e-05	0.999968	0.000363966	0.999636	FALSE	TRUE
	0	112	8	127.919	-0.0937299	37.2176	3.83819e-05	0.999962	0.000371013	0.999629	FALSE	TRUE
	0	112	9	146.603	3.7764	21.879	1.25392e-05	0.999987	2.48806e-05	0.999975	FALSE	TRUE
	0	112	10	159.266	0.961072	49.489	1.00573e-05	0.99999	8.22946e-06	0.999992	FALSE	TRUE
	0	112	11	96.0172	5.14265	59.0554	4.6474e-05	0.999954	0.0239465	0.976053	FALSE	TRUE
	0	112	12	145.216	5.01863	11.7797	2.29628e-05	0.999977	2.54398e-05	0.999975	FALSE	TRUE
	0	112	13	69.5572	-0.145624	83.0663	0.00074062	0.999259	0.201082	0.798918	FALSE	TRUE
	0	112	14	169.675	-4.63807	105.049	2.06488e-06	0.999998	1.51341e-05	0.999985	FALSE	TRUE
	0	112	15	199.003	1.37074	78.2158	2.20743e-06	0.999998	6.68962e-08	1	FALSE	TRUE
	5	113	1	31.846	-11.0585	110.618	0.00945773	0.990542	0.847752	0.152248	FALSE	FALSE
	5	113	2	15.8442	-13.2473	195.846	0.999995	4.57885e-06	0.993688	0.00631192	TRUE	FALSE
	5	113	3	10.6827	-24.3247	215.73	0.999934	6.61377e-05	0.999241	0.000758778	TRUE	FALSE
	3	114	1	56.261	-8.8459	109.36	0.00246025	0.99754	0.576324	0.423676	FALSE	FALSE
	3	114	2	34.0797	-21.6656	149.912	0.00697191	0.993028	0.990957	0.00904251	FALSE	FALSE
	3	114	3	26.4901	-25.4179	162.992	0.055111	0.944889	0.998324	0.00167594	FALSE	FALSE
	3	114	4	18.434	-21.2141	185.762	0.113262	0.886738	0.995913	0.00408738	TRUE	FALSE
	3	114	5	23.9884	-9.03124	130.642	0.669672	0.330328	0.891901	0.108099	FALSE	FALSE
	3	114	6	11.7142	-15.6878	140.842	0.994741	0.00525913	0.970598	0.0294018	TRUE	FALSE
	3	114	7	11.5121	-25.0014	197.992	0.999815	0.000185213	0.998975	0.00102501	TRUE	FALSE
	3	114	8	1.04892	-17.5784	167.548	0.999994	6.42644e-06	0.98845	0.0115495	TRUE	FALSE
	3	115	1	24.9702	-26.3734	199.379	0.0143242	0.985676	0.999208	0.000792125	FALSE	FALSE
	3	115	2	54.8688	-1.18358	157.981	0.000229459	0.999771	0.963831	0.0361691	FALSE	FALSE
	3	115	3	52.2826	-7.44397	146.256	0.000154971	0.999845	0.851206	0.148794	FALSE	FALSE
	3	115	4	7.13859	-23.1535	183.74	0.999245	0.000755071	0.997768	0.00223204	TRUE	FALSE
	3	115	5	5.12664	-23.013	194.864	0.999989	1.05435e-05	0.998158	0.00184249	TRUE	FALSE
	3	115	6	17.726	-21.7977	170.029	0.216329	0.783671	0.995301	0.00469904	FALSE	FALSE
	3	116	1	38.7416	-19.0843	215.888	0.00115834	0.998842	0.997408	0.00259243	FALSE	FALSE
	3	116	2	83.665	0.614757	190.213	0.000367634	0.999632	0.995517	0.00448305	FALSE	FALSE
	3	116	3	95.4127	-26.5906	220.222	5.27317e-05	0.999947	0.989586	0.0104144	FALSE	FALSE
	3	116	4	43.446	-31.9006	255.234	0.000105291	0.999895	0.999961	3.8916e-05	FALSE	FALSE
	3	116	5	178.799	-2.90974	51.8915	3.83067e-06	0.999996	4.79185e-07	1	FALSE	FALSE
	3	116	6	59.4059	-7.32497	198.218	5.70647e-05	0.999943	0.992259	0.00774088	FALSE	FALSE
	3	116	7	16.742	-27.7045	214.437	0.554696	0.445304	0.999678	0.000322448	TRUE	FALSE
	3	116	8	50.9501	-22.2934	150.006	8.14279e-05	0.999919	0.985402	0.0145978	FALSE	FALSE
	3	116	9	6.74372	-12.815	234.816	1	4.65651e-07	0.999551	0.000448708	TRUE	FALSE
	3	116	10	15.2967	-29.4553	248.304	0.984503	0.0154974	0.999935	6.50235e-05	TRUE	FALSE
	3	117	1	137.12	7.49321	106.627	1.25547e-06	0.999999	0.0142412	0.985759	FALSE	FALSE
	3	117	2	208.689	1.95565	28.4229	8.97018e-07	0.999999	1.35158e-09	1	FALSE	FALSE
	3	117	3	153.439	3.00362	19.8164	1.01292e-05	0.99999	9.14844e-06	0.999991	FALSE	FALSE
	3	117	4	202.625	-10.7783	128.097	7.74767e-07	0.999999	2.83588e-07	1	FALSE	FALSE
	3	117	5	140.511	-18.2669	126.294	4.19586e-06	0.999996	0.00665822	0.993342	FALSE	FALSE
	3	117	6	122.986	-1.22248	102.142	3.81644e-06	0.999996	0.00559334	0.994407	FALSE	FALSE
	3	117	7	27.7479	-3.34401	167.665	0.00158668	0.998413	0.986077	0.0139232	FALSE	FALSE
	3	117	8	9.14032	-10.0054	182.105	0.999976	2.44991e-05	0.988567	0.0114327	TRUE	FALSE
	3	117	9	52.4262	-19.9228	225.568	0.0335593	0.966441	0.997879	0.00212093	FALSE	FALSE
	3	117	10	162.752	0.714435	78.468	2.42971e-06	0.999998	1.64156e-05	0.999984	FALSE	FALSE
	3	117	11	41.7761	-32.6127	214.973	0.000630955	0.999369	0.999914	8.55933e-05	FALSE	FALSE
	3	117	12	11.9851	-22.7324	224.607	0.640567	0.359433	0.999258	0.000742286	TRUE	FALSE
	0.3	118	1	128.079	-0.0349935	32.757	4.14184e-05	0.999959	0.000340097	0.99966	FALSE	FALSE
	0.3	118	2	147.32	-2.68831	38.4006	1.79429e-05	0.999982	3.80048e-05	0.999962	FALSE	FALSE
	0.3	118	3	111.35	-8.09592	87.5313	9.03431e-05	0.99991	0.0109735	0.989026	FALSE	FALSE
	0.3	118	4	115.569	-2.35704	63.5607	3.69092e-05	0.999963	0.00272588	0.997274	FALSE	FALSE
	0.3	118	5	181.262	4.67803	13.8041	3.29448e-06	0.999997	1.17966e-07	1	FALSE	FALSE
	0.3	118	6	145.616	-4.60889	47.3329	2.56901e-05	0.999974	6.65139e-05	0.999933	FALSE	FALSE
	0.3	118	7	144.326	-8.30715	82.7173	1.06518e-05	0.999989	0.000232085	0.999768	FALSE	FALSE
	0.3	118	8	134.045	-10.2512	72.8786	1.13085e-05	0.999989	0.0010056	0.998994	FALSE	FALSE
	0.3	118	9	162.266	-6.67378	62.1535	5.79164e-06	0.999994	1.05603e-05	0.999989	FALSE	FALSE
	0.3	118	10	141.949	-0.331038	71.8181	1.65939e-05	0.999983	0.000173178	0.999827	FALSE	FALSE
	0.3	118	11	92.7451	0.499226	70.1726	0.00124096	0.998759	0.0291976	0.970802	FALSE	FALSE
	0.3	118	12	150.262	-4.91613	48.9155	1.22539e-05	0.999988	3.75123e-05	0.999962	FALSE	FALSE
	0.3	118	13	107.639	-8.59528	69.5136	6.3284e-05	0.999937	0.0135041	0.986496	FALSE	FALSE
	0.3	118	14	103.511	-7.55309	89.1614	0.00012995	0.99987	0.0227225	0.977278	FALSE	FALSE
	0.3	118	15	101.952	-0.772246	95.5064	3.83916e-05	0.999962	0.0315467	0.968453	FALSE	FALSE
	0.3	118	16	101.444	-12.4454	103.067	3.59017e-05	0.999964	0.0711179	0.928882	FALSE	FALSE
	0.3	119	1	59.9236	-17.2588	129.113	3.74926e-05	0.999963	0.880614	0.119386	FALSE	FALSE
	0.3	119	2	185.819	5.09565	18.7139	1.53016e-06	0.999998	6.52024e-08	1	FALSE	FALSE
	0.3	119	3	223.19	-3.32357	47.3752	7.22594e-07	0.999999	1.65034e-10	1	FALSE	FALSE
	0.3	119	4	132.256	4.61464	63.5014	9.54266e-06	0.99999	0.000681264	0.999319	FALSE	FALSE
	0.3	119	5	189.242	-1.26216	78.4432	1.28799e-06	0.999999	2.49305e-07	1	FALSE	FALSE
	0.3	119	6	168.158	-4.81908	91.3231	9.30165e-06	0.999991	9.73578e-06	0.99999	FALSE	FALSE
	0.3	119	7	96.4009	-3.12369	114.503	0.000247612	0.999752	0.0934265	0.906573	FALSE	FALSE
	0.3	119	8	179.419	1.97731	64.6355	1.04024e-06	0.999999	8.28635e-07	0.999999	FALSE	FALSE
	0.3	119	9	130.144	2.83463	21.146	2.31755e-05	0.999977	0.000204506	0.999795	FALSE	FALSE
	0.3	119	10	125.065	4.85205	121.899	3.5116e-06	0.999996	0.0658534	0.934147	FALSE	FALSE
	0.3	119	11	104.052	-12.4514	100.593	1.9023e-05	0.999981	0.0547052	0.945295	FALSE	FALSE
	0.3	119	12	51.08	-1.20525	125.323	0.000155171	0.999845	0.792817	0.207183	FALSE	FALSE
	0.3	119	13	92.5499	1.02182	94.1279	1.32684e-05	0.999987	0.0774019	0.922598	FALSE	FALSE
	0.3	119	14	111.417	10.3711	25.5455	3.25684e-06	0.999997	0.00391883	0.996081	FALSE	FALSE
	0.3	119	15	58.9015	-21.2735	172.593	5.69298e-05	0.999943	0.979127	0.0208725	FALSE	FALSE
	0.3	119	16	143.426	3.20093	38.0435	9.10652e-06	0.999991	5.56583e-05	0.999944	FALSE	FALSE
	0.5	120	1	108.835	-5.78769	52.2797	5.796e-05	0.999942	0.201898	0.798102	FALSE	FALSE
	0.5	120	2	45.179	-1.17088	124.489	0.00901777	0.990982	0.823817	0.176183	FALSE	FALSE
	0.5	120	3	36.6045	-11.1685	202.169	0.000580896	0.999419	0.994837	0.00516296	FALSE	FALSE
	0.5	120	4	57.3312	-19.7626	199.298	0.0392373	0.960763	0.989633	0.0103667	FALSE	FALSE
	0.5	120	5	161.404	-2.22851	34.2109	1.09187e-05	0.999989	4.64323e-06	0.999995	FALSE	FALSE
	0.5	120	6	30.6219	-20.1444	142.75	0.00280269	0.997197	0.986239	0.013761	FALSE	FALSE
	0.5	120	7	54.3485	-2.26886	120.711	0.00160379	0.998396	0.69463	0.30537	FALSE	FALSE
	0.5	120	8	50.5714	-19.0484	140.441	0.000992939	0.999007	0.95717	0.0428297	FALSE	FALSE
	0.5	120	9	170.564	1.35746	21.0998	1.01395e-05	0.99999	7.48975e-07	0.999999	FALSE	FALSE
	0.5	120	10	19.4883	-13.881	177.057	0.999115	0.000884672	0.984011	0.0159893	TRUE	FALSE
	0.5	120	11	44.7709	-17.3855	189.911	0.00487449	0.995126	0.987175	0.0128248	FALSE	FALSE
	0.5	120	12	71.4998	-18.8172	123.177	0.000753649	0.999246	0.846162	0.153838	FALSE	FALSE
	0.5	120	13	98.2132	-10.9507	98.1167	0.000257092	0.999743	0.0672278	0.932772	FALSE	FALSE
	0.5	121	1	101.577	-3.20083	94.3591	5.45952e-05	0.999945	0.0267283	0.973272	FALSE	FALSE
	0.5	121	2	154.65	5.28689	64.3032	1.42467e-06	0.999999	4.91293e-05	0.999951	FALSE	FALSE
	0.5	121	3	229.431	-0.782081	36.4485	4.49494e-07	1	3.12599e-11	1	FALSE	FALSE
	0.5	121	4	113.035	-5.09295	139.794	1.00696e-05	0.99999	0.0751946	0.924805	FALSE	FALSE
	0.5	121	5	245.167	-0.581488	20.6844	2.25445e-07	1	7.37826e-13	1	FALSE	FALSE
	0.5	121	6	196.533	-4.30499	70.3514	2.92326e-06	0.999997	4.84413e-08	1	FALSE	FALSE
	0.5	121	7	159.409	6.26917	43.3602	3.79113e-06	0.999996	1.09353e-05	0.999989	FALSE	FALSE
	0.5	121	8	173.805	-3.41961	31.1718	3.71438e-06	0.999996	7.61679e-07	0.999999	FALSE	FALSE
	0.5	121	9	68.2363	8.84658	79.1146	0.00232501	0.997675	0.537402	0.462598	FALSE	FALSE
	0.5	121	10	101.869	-1.51332	142.496	2.47497e-05	0.999975	0.318483	0.681517	FALSE	FALSE
	0.5	121	11	172.087	1.42602	9.89012	7.12776e-06	0.999993	4.98133e-07	1	FALSE	FALSE
	0.5	121	12	134.041	-6.93699	89.6466	1.18426e-05	0.999988	0.000864413	0.999136	FALSE	FALSE
	0.5	121	13	135.827	2.4252	23.9387	6.23626e-05	0.999938	0.000105398	0.999895	FALSE	FALSE
	10	122	1	36.9648	-3.997	182.461	0.0293809	0.970619	0.993447	0.00655269	FALSE	FALSE
	10	122	2	16.5771	-26.3339	196.482	0.992427	0.00757271	0.999272	0.000728434	TRUE	FALSE
	10	122	3	35.1138	-16.1868	116.68	0.00381946	0.996181	0.944138	0.0558624	FALSE	FALSE
	10	122	4	14.2043	-10.746	199.18	0.972898	0.0271022	0.995512	0.004488	TRUE	FALSE
	10	122	5	11.3473	-27.6334	226.308	1	6.57299e-08	0.999772	0.000228364	TRUE	FALSE
	6	123	1	25.1085	-28.1921	182.213	0.00720417	0.992796	0.837232	0.162768	FALSE	FALSE
	6	123	2	186.192	-7.22758	54.734	1.60849e-06	0.999998	2.40209e-07	1	FALSE	FALSE
	6	123	3	193.574	-8.753	91.2146	1.47138e-06	0.999999	2.17946e-07	1	FALSE	FALSE
	6	123	4	141.832	-8.24386	91.0411	6.73335e-06	0.999993	0.000389764	0.99961	FALSE	FALSE
	6	123	5	6.41929	-13.3616	207.016	0.999813	0.000187225	0.996752	0.00324807	TRUE	FALSE
	6	123	6	9.48253	-18.9883	161.333	0.999996	4.48678e-06	0.989911	0.0100886	TRUE	FALSE
	6	124	1	27.022	1.59066	94.0655	0.00232616	0.997674	0.852045	0.147955	FALSE	FALSE
	6	124	2	54.6584	7.61913	139.137	0.00132198	0.998678	0.991701	0.00829861	FALSE	FALSE
	6	124	3	147.256	-7.67203	86.3433	3.09478e-06	0.999997	0.000162321	0.999838	FALSE	FALSE
	6	124	4	164.753	-7.16151	119.404	1.34056e-06	0.999999	5.78437e-05	0.999942	FALSE	FALSE
	6	124	5	143.583	-18.0809	173.39	6.49312e-06	0.999994	0.0224169	0.977583	FALSE	FALSE
	6	124	6	158.3	-6.75454	78.5838	8.46875e-06	0.999992	2.72384e-05	0.999973	FALSE	FALSE
	6	124	7	75.7802	-17.8633	159.37	1.80501e-05	0.999982	0.853401	0.146599	FALSE	FALSE
	6	124	8	123.972	-5.78747	91.624	4.62613e-05	0.999954	0.00270905	0.997291	FALSE	FALSE
	6	124	9	8.58883	-21.814	207.797	0.998718	0.00128218	0.998324	0.00167552	TRUE	FALSE
	6	124	10	8.70123	-27.2451	205.688	0.999965	3.52034e-05	0.999583	0.000417237	TRUE	FALSE
	6	125	1	122.064	-10.5225	67.5372	1.2323e-05	0.999988	0.00429893	0.995701	FALSE	FALSE
	6	125	2	38.0972	-18.4454	172.359	0.0278164	0.972184	0.983327	0.0166734	FALSE	FALSE
	6	125	3	48.9881	-16.7181	261.121	0.0049003	0.9951	0.999884	0.00011563	FALSE	FALSE
	6	125	4	158.474	-0.150493	66.4237	5.83592e-06	0.999994	1.60412e-05	0.999984	FALSE	FALSE
	6	125	5	160.791	-6.6059	94.5189	3.52072e-06	0.999996	3.21613e-05	0.999968	FALSE	FALSE
	6	125	6	118.838	-13.768	108.95	2.94755e-05	0.999971	0.0192473	0.980753	FALSE	FALSE
	6	125	7	9.48018	-5.16028	175.135	0.999883	0.000117359	0.990045	0.00995549	TRUE	FALSE
	6	125	8	15.2885	-20.0473	196.018	0.973555	0.0264452	0.996346	0.00365414	TRUE	FALSE
	6	125	9	24.3425	-30.603	206.165	0.0239211	0.976079	0.999858	0.000141555	FALSE	FALSE
	6	125	10	9.51383	-19.0901	199.861	0.999943	5.69757e-05	0.996482	0.0035183	TRUE	FALSE
	6	126	1	29.1199	-8.95153	123.303	0.00386005	0.99614	0.854595	0.145405	FALSE	FALSE
	6	126	2	189.107	-1.68933	56.0631	3.75018e-07	1	9.85606e-08	1	FALSE	FALSE
	6	126	3	44.0145	-16.6542	232.028	0.00148207	0.998518	0.998893	0.00110676	FALSE	FALSE
	6	126	4	62.1848	-8.50602	180.162	0.000588714	0.999411	0.960349	0.0396512	FALSE	FALSE
	6	126	5	45.0722	-10.8368	173.165	0.000252987	0.999747	0.963322	0.0366781	FALSE	FALSE
	6	126	6	7.49363	-19.3139	177.172	1	1.52292e-08	0.993227	0.0067732	TRUE	FALSE
	0.2	127	1	67.533	-6.12098	103.885	7.30369e-05	0.999927	0.336819	0.663181	FALSE	FALSE
	0.2	127	2	86.3195	-14.1935	147.463	0.000678806	0.999321	0.519185	0.480815	FALSE	FALSE
	0.2	127	3	128.059	3.25867	59.289	0.00494454	0.995055	0.000759608	0.99924	FALSE	FALSE
	0.2	127	4	98.7378	8.03668	65.7561	0.000501889	0.999498	0.0449465	0.955054	FALSE	FALSE
	0.2	127	5	96.4056	-4.678	85.5285	7.80798e-06	0.999992	0.0320002	0.968	FALSE	FALSE
	0.2	127	6	107.777	-3.97259	82.6168	0.000495891	0.999504	0.0102879	0.989712	FALSE	FALSE
	0.2	127	7	144.478	-0.219159	40.7622	9.3919e-06	0.999991	4.93296e-05	0.999951	FALSE	FALSE
	0.2	127	8	54.0038	-8.77541	140.509	0.000750097	0.99925	0.800419	0.199581	FALSE	FALSE
	0.2	127	9	146.053	-4.15285	48.0011	1.75316e-05	0.999982	5.98648e-05	0.99994	FALSE	FALSE
	0.2	127	10	130.634	-4.49479	61.5636	2.22943e-05	0.999978	0.000545472	0.999455	FALSE	FALSE
	0.2	127	11	118.35	-1.04272	46.5811	2.48967e-05	0.999975	0.00136019	0.99864	FALSE	FALSE
	0.2	127	12	92.6215	0.119855	119.839	9.15702e-05	0.999908	0.227835	0.772165	FALSE	FALSE
	0.2	127	13	142.751	-5.00756	44.487	3.38955e-05	0.999966	0.000100114	0.9999	FALSE	FALSE
	0.2	127	14	167.509	5.93553	5.37545	4.80933e-06	0.999995	9.16918e-07	0.999999	FALSE	FALSE
	0.2	127	15	122.132	-4.43578	88.728	2.13315e-05	0.999979	0.00290579	0.997094	FALSE	FALSE
	0.2	127	16	115.604	4.38947	67.9034	2.66858e-05	0.999973	0.00493371	0.995066	FALSE	FALSE
	0.2	127	17	118.719	-3.24208	48.8115	6.68576e-05	0.999933	0.00158301	0.998417	FALSE	FALSE
	0.2	127	18	100.454	0.313859	68.0387	7.60515e-05	0.999924	0.0138692	0.986131	FALSE	FALSE
	0.2	127	19	89.3585	-2.26286	55.8597	0.000329994	0.99967	0.0286563	0.971344	FALSE	FALSE
	0.2	128	1	210.434	-0.293591	16.6273	7.09097e-07	0.999999	7.67381e-10	1	FALSE	FALSE
	0.2	128	2	165.088	-11.9327	87.7712	1.78862e-06	0.999998	2.68241e-05	0.999973	FALSE	FALSE
	0.2	128	3	142.307	-10.4475	128.457	4.6999e-06	0.999995	0.00166512	0.998335	FALSE	FALSE
	0.2	128	4	204.197	5.32342	8.95168	6.88899e-07	0.999999	1.9943e-09	1	FALSE	FALSE
	0.2	128	5	237.648	2.83323	64.5333	4.68201e-07	1	2.97836e-11	1	FALSE	FALSE
	0.2	128	6	219.275	-2.32477	62.1588	6.72598e-07	0.999999	5.82899e-10	1	FALSE	FALSE
	0.2	128	7	201.95	-2.62845	41.3506	5.12305e-07	0.999999	7.19826e-09	1	FALSE	FALSE
	0.2	128	8	160.097	-7.19508	96.1847	9.82734e-06	0.99999	3.86067e-05	0.999961	FALSE	FALSE
	0.2	128	9	165.558	4.77519	50.7227	2.13689e-06	0.999998	5.00864e-06	0.999995	FALSE	FALSE
	0.2	128	10	175.359	-2.39344	34.4289	2.94038e-06	0.999997	5.54126e-07	0.999999	FALSE	FALSE
	0.2	128	11	146.776	-4.26904	66.4558	1.77432e-05	0.999982	7.86109e-05	0.999921	FALSE	FALSE
	0.2	128	12	134.45	-2.17507	88.379	3.59079e-06	0.999996	0.000758342	0.999242	FALSE	FALSE
	0.2	128	13	172.77	-3.89604	41.8984	7.72607e-06	0.999992	1.09298e-06	0.999999	FALSE	FALSE
	0.2	128	14	204.219	3.70694	61.1394	1.68968e-06	0.999998	1.49932e-08	1	FALSE	FALSE
	0.2	128	15	207.912	-3.30453	39.4885	9.61764e-07	0.999999	2.44898e-09	1	FALSE	FALSE
	0.2	128	16	188.129	-5.99401	72.5518	1.7837e-06	0.999998	2.31042e-07	1	FALSE	FALSE
	0.2	128	17	208.004	-1.33633	34.1878	1.92774e-06	0.999998	1.8652e-09	1	FALSE	FALSE
	0.2	128	18	159.075	-1.19471	36.6204	1.37709e-05	0.999986	6.26684e-06	0.999994	FALSE	FALSE
	0.2	128	19	103.634	-20.3548	148.552	6.90605e-06	0.999993	0.481835	0.518165	FALSE	FALSE
	0.2	128	20	213.805	-4.54392	61.6509	6.61853e-07	0.999999	1.65859e-09	1	FALSE	FALSE
	0.2	128	21	204.694	0.738641	16.0908	1.58329e-06	0.999998	2.09406e-09	1	FALSE	FALSE
	0.2	128	22	190.075	1.40854	21.681	1.69051e-06	0.999998	3.10209e-08	1	FALSE	FALSE
	0.2	128	23	182.435	-5.38663	57.0932	7.53287e-07	0.999999	3.66728e-07	1	FALSE	FALSE
	0.2	128	24	209.16	2.946	14.2287	9.76336e-07	0.999999	8.43345e-10	1	FALSE	FALSE
	0.2	128	25	122.368	4.48938	122.25	3.73804e-06	0.999996	0.0772018	0.922798	FALSE	FALSE
	0.2	128	26	141.585	1.48347	50.7665	6.55289e-06	0.999993	9.48341e-05	0.999905	FALSE	FALSE
	0.2	128	27	172.671	2.94616	28.4979	1.00929e-06	0.999999	6.41539e-07	0.999999	FALSE	FALSE
	0.2	128	28	193.54	6.45417	3.31851	1.40534e-06	0.999999	1.23811e-08	1	FALSE	FALSE
	0.2	128	29	156.637	-0.0192041	20.1862	1.31464e-05	0.999987	6.51411e-06	0.999993	FALSE	FALSE
	0.2	128	30	142.755	-4.76915	59.279	1.98776e-05	0.99998	0.000118403	0.999882	FALSE	FALSE
	0.2	128	31	166.871	-0.698594	25.3951	4.83165e-06	0.999995	1.58401e-06	0.999998	FALSE	FALSE
	0.2	128	32	140.706	-1.82636	34.1976	2.88654e-05	0.999971	8.05787e-05	0.999919	FALSE	FALSE
	0.2	128	33	151.198	-14.4451	108.171	4.65999e-06	0.999995	0.000469772	0.99953	FALSE	FALSE
	0.2	128	34	185.82	5.96017	20.4697	3.48037e-06	0.999997	7.43853e-08	1	FALSE	FALSE
	0.2	128	35	181.198	3.5776	36.0191	1.01838e-06	0.999999	2.19538e-07	1	FALSE	FALSE
	1	129	1	124.357	-4.31684	96.1421	3.13257e-05	0.999969	0.00299945	0.997001	FALSE	FALSE
	1	129	2	116.836	-5.99316	69.1847	0.000110186	0.99989	0.00347846	0.996522	FALSE	FALSE
	1	129	3	94.4076	-13.3149	102.351	0.000204806	0.999795	0.146931	0.853069	FALSE	FALSE
	1	129	4	80.816	15.7192	107.914	3.16147e-06	0.999997	0.990626	0.00937417	FALSE	FALSE
	1	129	5	57.2315	-22.069	152.532	0.00192095	0.998079	0.978833	0.0211673	FALSE	FALSE
	1	129	6	70.2627	-19.5088	222.026	2.12562e-05	0.999979	0.994295	0.0057047	FALSE	FALSE
	1	129	7	40.8155	-34.7978	244.183	0.00188384	0.998116	0.999982	1.81617e-05	FALSE	FALSE
	1	129	8	17.6138	-23.8543	253.435	0.000484171	0.999516	0.999853	0.000147177	FALSE	FALSE
	1	129	9	82.2977	-2.79807	195.532	9.55721e-05	0.999904	0.991405	0.00859495	FALSE	FALSE
	1	129	10	88.2084	-20.8477	164.135	0.000197774	0.999802	0.84427	0.15573	FALSE	FALSE
	1	129	11	97.5015	-14.7654	140.418	0.000103903	0.999896	0.277901	0.722099	FALSE	FALSE
	1	129	12	68.6523	-24.3392	181.558	0.000450506	0.999549	0.987769	0.0122307	FALSE	FALSE
	1	129	13	55.1454	-10.4423	121.468	0.000581853	0.999418	0.69319	0.30681	FALSE	FALSE
	1	129	14	35.865	-21.2955	181.192	0.00358389	0.996416	0.993293	0.00670656	FALSE	FALSE
	1	129	15	67.8928	-18.8598	186.374	0.000127321	0.999873	0.966341	0.0336594	FALSE	FALSE
	1	129	16	131.034	-16.8599	148.505	2.82797e-06	0.999997	0.0265987	0.973401	FALSE	FALSE
	1	129	17	15.1892	-26.115	207.286	0.905345	0.094655	0.999381	0.000619033	TRUE	FALSE
	1	129	18	68.4662	-1.92823	89.0255	9.66363e-06	0.99999	0.231574	0.768426	FALSE	FALSE
	1	129	19	129.741	-7.16717	144.435	5.67066e-05	0.999943	0.0167262	0.983274	FALSE	FALSE
	1	129	20	245.738	-6.13755	55.3847	2.91541e-07	1	2.59116e-12	1	FALSE	FALSE
	1	129	21	48.5329	-43.0864	297.481	2.29602e-05	0.999977	1	1.06474e-07	FALSE	FALSE
	1	129	22	66.2499	-26.5289	211.703	0.000106368	0.999894	0.997584	0.00241573	FALSE	FALSE
	1	129	23	26.1715	-28.939	242.151	0.935408	0.0645923	0.999893	0.000106747	TRUE	FALSE
	1	130	1	37.7691	-12.6178	92.0974	0.013703	0.986297	0.852997	0.147003	FALSE	FALSE
	1	130	2	53.3598	-5.73667	96.0284	0.00245093	0.997549	0.479373	0.520627	FALSE	FALSE
	1	130	3	52.3214	-8.02634	70.5899	0.00615071	0.993849	0.500332	0.499668	FALSE	FALSE
	1	130	4	68.5493	-16.2751	140.923	0.000447268	0.999553	0.807198	0.192802	FALSE	FALSE
	1	130	5	76.8663	1.32233	71.1537	0.00327208	0.996728	0.102386	0.897614	FALSE	FALSE
	1	130	6	49.6188	-13.6665	176.108	0.0259853	0.974015	0.963355	0.0366449	FALSE	FALSE
	1	130	7	66.4203	-16.163	165.8	0.00110014	0.9989	0.905501	0.0944988	FALSE	FALSE
	1	130	8	74.6323	-18.1553	152.019	0.000706296	0.999294	0.845685	0.154315	FALSE	FALSE
	1	130	9	31.61	-13.0197	253.866	0.00266079	0.997339	0.999908	9.17342e-05	FALSE	FALSE
	1	130	10	73.3525	-8.95428	102.323	0.00127202	0.998728	0.294843	0.705157	FALSE	FALSE
	1	130	11	46.5371	-3.9384	195.61	0.000744785	0.999255	0.997247	0.0027527	FALSE	FALSE
	1	130	12	12.6527	-7.6018	110.274	0.999991	8.65612e-06	0.854634	0.145366	TRUE	FALSE
	1	130	13	9.61431	-22.9879	165.814	0.999937	6.34545e-05	0.997054	0.00294594	TRUE	FALSE
	1	131	1	54.8077	-15.6348	102.958	0.00221234	0.997788	0.849736	0.150264	FALSE	FALSE
	1	131	2	54.8351	-22.2249	156.302	0.00330398	0.996696	0.982833	0.0171674	FALSE	FALSE
	1	131	3	48.1483	-15.42	109.37	0.0034599	0.99654	0.882666	0.117334	FALSE	FALSE
	1	131	4	39.5215	-13.7581	95.1259	0.00271589	0.997284	0.879147	0.120853	FALSE	FALSE
	1	131	5	15.6139	10.969	106.321	0.098656	0.901344	0.98964	0.0103596	FALSE	FALSE
	1	131	6	114.955	-0.81061	39.0412	7.70316e-05	0.999923	0.00174523	0.998255	FALSE	FALSE
	1	131	7	106.799	1.58365	22.7863	3.2679e-05	0.999967	0.00308011	0.99692	FALSE	FALSE
	1	131	8	82.8314	-16.443	147.566	1.03095e-05	0.99999	0.663157	0.336843	FALSE	FALSE
	1	131	9	100.242	-20.5707	148.049	1.38187e-05	0.999986	0.569487	0.430513	FALSE	FALSE
	1	131	10	190.565	-7.93001	94.3112	4.68099e-06	0.999995	3.7894e-07	1	FALSE	FALSE
	1	131	11	35.6797	-11.4544	111.426	0.0140691	0.985931	0.839632	0.160368	FALSE	FALSE
	1	131	12	48.0504	-20.5806	165.798	0.00174945	0.998251	0.982403	0.0175966	FALSE	FALSE
	1	131	13	20.0925	-11.7276	144.87	0.0363637	0.963636	0.943209	0.0567911	FALSE	FALSE
	1	131	14	4.94083	-6.76278	89.2458	0.999999	5.70642e-07	0.826145	0.173855	TRUE	FALSE
	1	132	1	43.7881	-4.57165	129.715	0.000437882	0.999562	0.814661	0.185339	FALSE	FALSE
	1	132	2	94.4418	-15.7801	143.269	4.3708e-05	0.999956	0.389071	0.610929	FALSE	FALSE
	1	132	3	156.613	-10.3357	103.554	5.05737e-06	0.999995	0.000102896	0.999897	FALSE	FALSE
	1	132	4	199.909	-3.56491	64.6881	1.53421e-06	0.999998	2.16919e-08	1	FALSE	FALSE
	1	132	5	50.6578	-25.128	161.938	0.00376995	0.99623	0.995285	0.00471475	FALSE	FALSE
	1	132	6	82.91	-14.8689	116.014	0.000494053	0.999506	0.427162	0.572838	FALSE	FALSE
	1	132	7	84.4395	-20.7135	139.486	0.00084118	0.999159	0.817025	0.182975	FALSE	FALSE
	1	132	8	60.1485	-14.1839	148.971	0.000399118	0.999601	0.854126	0.145874	FALSE	FALSE
	1	132	9	76.5631	-16.2532	178.827	0.000919518	0.99908	0.902478	0.0975219	FALSE	FALSE
	1	132	10	93.7035	-17.5947	145.276	8.72899e-05	0.999913	0.504525	0.495475	FALSE	FALSE
	1	132	11	105.763	-14.9852	122.915	2.57757e-05	0.999974	0.109089	0.890911	FALSE	FALSE
	1	132	12	50.3245	-11.882	143.702	0.00705997	0.99294	0.860859	0.139141	FALSE	FALSE
	1	132	13	12.8121	-28.7238	219.72	0.00712219	0.992878	0.999805	0.000194719	FALSE	FALSE
	1	132	14	46.3779	-8.56318	167.131	0.00843193	0.991568	0.95276	0.0472405	FALSE	FALSE
	1	132	15	45.4919	-26.6865	225.136	0.00636813	0.993632	0.999407	0.000592512	FALSE	FALSE
	1	132	16	8.96411	-24.6313	179.582	0.999838	0.00016219	0.998516	0.00148386	TRUE	FALSE
	1	132	17	11.5399	-22.3636	198.099	0.944167	0.0558332	0.997928	0.00207168	TRUE	FALSE
	10	133	1	50.0644	-26.5869	192.556	0.000418211	0.999582	0.998143	0.00185686	FALSE	FALSE
	10	133	2	180.526	8.25089	45.6986	1.22828e-06	0.999999	7.99931e-07	0.999999	FALSE	FALSE
	10	133	3	71.7	-37.7453	255.945	5.56165e-05	0.999944	0.999987	1.30907e-05	FALSE	FALSE
	10	133	4	48.7833	-12.991	220.185	0.00152231	0.998478	0.997695	0.0023054	FALSE	FALSE
	10	133	5	23.6169	-18.5181	200.362	0.0432784	0.956722	0.995722	0.00427768	FALSE	FALSE
	10	133	6	54.7877	-10.4855	131.151	0.00158542	0.998415	0.750204	0.249796	FALSE	FALSE
	10	133	7	44.017	-25.3765	230.929	0.0039058	0.996094	0.999404	0.000596166	FALSE	FALSE
	10	133	8	4.87073	-19.2022	214.948	0.999999	1.10664e-06	0.998196	0.00180374	TRUE	FALSE
	10	133	9	5.67308	-7.21534	198.978	0.999898	0.000101745	0.997214	0.00278647	TRUE	FALSE
	10	134	1	61.5888	-22.9672	148.039	0.000206339	0.999794	0.979785	0.020215	FALSE	FALSE
	10	134	2	46.2443	-21.0804	209.773	0.000472392	0.999528	0.996477	0.00352273	FALSE	FALSE
	10	134	3	49.4224	-15.1379	101.692	0.000496757	0.999503	0.867596	0.132404	FALSE	FALSE
	10	134	4	111.529	-6.92919	184.851	6.34071e-06	0.999994	0.653844	0.346156	FALSE	FALSE
	10	134	5	43.4311	-18.4453	240.45	0.0020018	0.997998	0.999374	0.000626398	FALSE	FALSE
	10	134	6	10.7225	-21.0835	159.606	0.998678	0.00132219	0.99417	0.00583002	TRUE	FALSE
	10	134	7	9.8724	-26.5846	313.823	0.999997	2.82526e-06	0.999998	1.53777e-06	TRUE	FALSE
	10	135	1	37.4665	-27.3883	192.667	0.00104754	0.998952	0.999132	0.000868101	FALSE	FALSE
	10	135	2	39.9216	-33.9678	270.368	0.0148031	0.985197	0.99999	9.74137e-06	FALSE	FALSE
	10	135	3	40.5196	-8.48247	85.4122	0.00364928	0.996351	0.672689	0.327311	FALSE	FALSE
	10	135	4	7.13977	-20.8676	170.161	0.999678	0.000322316	0.994709	0.00529064	TRUE	FALSE
	10	135	5	62.0069	-10.0376	75.7361	0.000588467	0.999412	0.459484	0.540516	FALSE	FALSE
	10	135	6	0.370807	-30.7461	270.771	0.999999	1.37626e-06	0.999982	1.82048e-05	TRUE	FALSE
	10	136	1	18.3941	-21.7864	178.167	0.0244034	0.975597	0.995819	0.00418093	FALSE	FALSE
	10	136	2	36.1935	-31.167	208.871	0.00335372	0.996646	0.999854	0.00014614	FALSE	FALSE
	10	136	3	46.3777	-30.1689	225.976	0.0111006	0.988899	0.99979	0.000209527	FALSE	FALSE
	10	136	4	37.6597	-31.056	208.974	0.000522821	0.999477	0.99984	0.000160143	FALSE	FALSE
	10	136	5	47.8322	-27.2681	233.559	0.00201682	0.997983	0.999606	0.000394119	FALSE	FALSE
	10	136	6	25.0105	-18.4219	161.265	0.00592892	0.994071	0.984813	0.0151875	FALSE	FALSE
	10	136	7	29.4944	-22.1442	255.131	0.0240953	0.975905	0.999835	0.000165132	FALSE	FALSE
	10	136	8	5.89848	-11.2193	141.042	1	1.00695e-07	0.945893	0.0541072	TRUE	FALSE
	3	137	1	42.3389	-33.5738	220.098	0.0224905	0.977509	0.999947	5.25502e-05	FALSE	FALSE
	3	137	2	62.3827	4.4674	28.4554	0.000219641	0.99978	0.124111	0.875889	FALSE	FALSE
	3	137	3	78.2549	-24.3944	174.257	7.23689e-05	0.999928	0.974782	0.0252179	FALSE	FALSE
	3	137	4	146.272	-14.5046	117.288	6.26948e-06	0.999994	0.00111779	0.998882	FALSE	FALSE
	3	137	5	7.37153	-17.1881	196.136	1	4.32561e-08	0.994939	0.00506122	TRUE	FALSE
	3	138	1	75.0189	-18.6453	147.307	0.000199412	0.999801	0.844213	0.155787	FALSE	FALSE
	3	138	2	130.967	-27.6715	185.403	4.04435e-06	0.999996	0.598287	0.401713	FALSE	FALSE
	3	138	3	161.217	-14.566	194.126	7.54936e-07	0.999999	0.00881462	0.991185	FALSE	FALSE
	3	138	4	93.2319	-19.4225	235.427	2.57076e-05	0.999974	0.991555	0.00844502	FALSE	FALSE
	3	138	5	94.4406	-20.3934	175.291	4.24538e-05	0.999958	0.809974	0.190026	FALSE	FALSE
	3	138	6	138.294	-15.6176	129.694	9.94591e-06	0.99999	0.00515506	0.994845	FALSE	FALSE
	3	138	7	11.2683	-32.6675	276.054	0.999761	0.00023911	0.999992	8.06751e-06	TRUE	FALSE
	3	138	8	17.371	-30.0003	276.108	0.98056	0.01944	0.999985	1.54711e-05	TRUE	FALSE
	3	138	9	9.22803	-8.4556	101.569	0.99989	0.000109746	0.85949	0.14051	TRUE	FALSE
	3	139	1	25.4343	-1.72977	186.552	0.00988877	0.990111	0.997918	0.00208247	FALSE	FALSE
	3	139	2	26.7891	-13.8332	166.923	0.0549331	0.945067	0.972915	0.0270848	FALSE	FALSE
	3	139	3	64.6939	-14.7079	174.406	0.00244253	0.997557	0.928659	0.0713411	FALSE	FALSE
	3	139	4	24.4145	-23.1989	153.705	0.0772123	0.922788	0.996179	0.0038205	FALSE	FALSE
	3	139	5	54.399	-14.4314	139.608	0.00130205	0.998698	0.863065	0.136935	FALSE	FALSE
	3	139	6	49.1658	-15.1872	123.651	0.00124692	0.998753	0.87892	0.12108	FALSE	FALSE
	3	139	7	39.4569	-8.5872	151.841	0.00472674	0.995273	0.920717	0.0792829	FALSE	FALSE
	3	139	8	40.4791	3.47026	113.254	0.608831	0.391169	0.879925	0.120075	FALSE	FALSE
	3	139	9	34.337	-14.1933	96.3098	0.00164154	0.998358	0.911354	0.0886461	FALSE	FALSE
	3	139	10	56.534	-14.0609	94.6273	0.000313678	0.999686	0.765867	0.234133	FALSE	FALSE
	3	139	11	6.03399	-14.5133	220.01	1	4.12294e-07	0.998475	0.00152528	TRUE	FALSE
	3	140	1	61.4049	-1.35857	76.1118	4.12323e-05	0.999959	0.247287	0.752713	FALSE	FALSE
	3	140	2	52.1833	-11.5968	232.138	0.00284595	0.997154	0.999233	0.000767083	FALSE	FALSE
	3	140	3	156.982	-2.76969	48.2816	9.34142e-06	0.999991	1.16976e-05	0.999988	FALSE	FALSE
	3	140	4	111.875	-10.9882	149.409	2.09128e-05	0.999979	0.102618	0.897382	FALSE	FALSE
	3	140	5	148.549	-10.7673	98.5713	9.77464e-06	0.99999	0.000274827	0.999725	FALSE	FALSE
	3	140	6	21.0163	-32.4559	270.479	0.0825287	0.917471	0.999989	1.14195e-05	FALSE	FALSE
	3	140	7	53.3743	-17.7582	135.708	0.00184575	0.998154	0.927912	0.072088	FALSE	FALSE
	3	140	8	34.7248	-12.5028	166.036	0.00160748	0.998393	0.96313	0.0368697	FALSE	FALSE
	3	140	9	120.278	-13.0732	127.478	1.57219e-05	0.999984	0.0232618	0.976738	FALSE	FALSE
	3	140	10	82.6797	-23.4156	187.322	0.000116646	0.999883	0.967863	0.032137	FALSE	FALSE
	3	140	11	119.809	-5.66437	56.6897	1.6218e-05	0.999984	0.00204561	0.997954	FALSE	FALSE
	3	140	12	6.98088	-21.8601	258.935	0.999998	1.50819e-06	0.999879	0.000121416	TRUE	FALSE
	5	141	1	53.144	-17.4143	137.278	0.00116605	0.998834	0.923753	0.076247	FALSE	FALSE
	5	141	2	51.3129	-29.0324	223.322	0.000527114	0.999473	0.999603	0.000397348	FALSE	FALSE
	5	141	3	45.8788	-22.5257	188.757	0.00123818	0.998762	0.994296	0.00570353	FALSE	FALSE
	5	141	4	40.2534	-28.7722	255.283	0.0047919	0.995208	0.999918	8.1762e-05	FALSE	FALSE
	5	141	5	29.9508	-15.6377	178.154	0.0204484	0.979552	0.983733	0.0162666	FALSE	FALSE
	5	141	6	8.39578	-30.6738	193.04	0.999946	5.36156e-05	0.999886	0.00011386	TRUE	FALSE
	5	141	7	4.63887	-17.663	145.568	0.999889	0.000111079	0.983932	0.0160682	TRUE	FALSE
	5	142	1	30.0576	-31.4412	210.831	0.00989784	0.990102	0.999893	0.000106668	FALSE	FALSE
	5	142	2	32.594	-7.05245	278.146	0.0530045	0.946995	0.999999	9.07063e-07	FALSE	FALSE
	5	142	3	8.57221	-24.1433	175.389	1	3.69784e-08	0.998181	0.00181914	TRUE	FALSE
	2	143	1	39.2279	-22.3561	165.505	0.002782	0.997218	0.992446	0.00755418	FALSE	FALSE
	2	143	2	31.3315	-28.8309	253.779	0.0146424	0.985358	0.999928	7.22347e-05	FALSE	FALSE
	2	143	3	16.2139	-13.1586	138.705	0.685295	0.314705	0.948491	0.0515094	TRUE	FALSE
	2	143	4	37.4958	-32.3883	249.441	0.0566892	0.943311	0.999965	3.54466e-05	FALSE	FALSE
	2	143	5	92.7317	-21.0475	164.29	2.47481e-05	0.999975	0.801776	0.198224	FALSE	FALSE
	2	143	6	49.3059	-27.6026	180.572	0.0110488	0.988951	0.998551	0.00144858	FALSE	FALSE
	2	143	7	16.8099	-32.2963	234.073	0.999857	0.000142931	0.999961	3.9377e-05	TRUE	FALSE
	6	144	1	58.8751	-7.82741	239.644	6.85748e-05	0.999931	0.999825	0.000174794	FALSE	FALSE
	6	144	2	179.73	8.52712	15.9374	3.50718e-06	0.999996	2.37771e-07	1	FALSE	FALSE
	6	144	3	97.8268	-1.40067	122.308	0.000120238	0.99988	0.148262	0.851738	FALSE	FALSE
	6	144	4	3.468	-15.3801	229.81	1	1.01861e-07	0.999154	0.000845537	TRUE	FALSE
	6	145	1	28.7999	-29.3451	198.994	0.00195811	0.998042	0.999711	0.000288535	FALSE	FALSE
	6	145	2	31.5173	-27.4308	245.178	0.00148089	0.998519	0.999851	0.000148878	FALSE	FALSE
	6	145	3	28.795	-23.1308	169.337	0.0139349	0.986065	0.995971	0.00402856	FALSE	FALSE
	6	145	4	46.431	-22.9086	211.827	0.000221387	0.999779	0.997606	0.00239392	FALSE	FALSE
	6	145	5	39.6431	-15.9371	211.405	0.00307598	0.996924	0.996135	0.00386462	FALSE	FALSE
	6	145	6	99.7878	-18.7964	175.39	2.28329e-05	0.999977	0.676791	0.323209	FALSE	FALSE
	6	145	7	35.3283	-21.487	180.737	0.00501142	0.994989	0.993629	0.00637103	FALSE	FALSE
	6	145	8	25.9138	-28.6419	226.491	0.000504452	0.999496	0.999801	0.00019873	FALSE	FALSE
	6	145	9	2.92636	-18.8832	136.742	1	3.62977e-08	0.988562	0.0114385	TRUE	FALSE
	6	146	1	35.9663	-10.7134	133.43	0.00541745	0.994583	0.877524	0.122476	FALSE	FALSE
	6	146	2	12.7866	-12.4801	251.856	0.975886	0.0241142	0.999905	9.53363e-05	TRUE	FALSE
	6	146	3	75.464	-15.8519	188.449	7.23112e-05	0.999928	0.939577	0.0604234	FALSE	FALSE
	6	146	4	49.9884	-37.5592	327.585	0.00100388	0.998996	1	1.67848e-07	FALSE	FALSE
	6	146	5	68.5757	-33.2583	238.692	0.000114781	0.999885	0.999878	0.000121809	FALSE	FALSE
	6	146	6	54.4807	-34.2994	236.09	0.001068	0.998932	0.999955	4.45397e-05	FALSE	FALSE
	6	146	7	49.4212	-14.2454	265.512	0.00207744	0.997923	0.99995	4.99835e-05	FALSE	FALSE
	6	146	8	9.33988	-24.2436	225.891	1	1.5569e-07	0.99947	0.000530085	TRUE	FALSE
	0.5	147	1	36.5236	-5.30447	126.628	0.00838214	0.991618	0.827746	0.172254	FALSE	FALSE
	0.5	147	2	146.613	-18.9454	168.364	8.44254e-06	0.999992	0.0140752	0.985925	FALSE	FALSE
	0.5	147	3	245.645	-5.72763	63.2467	1.76478e-07	1	3.33586e-12	1	FALSE	FALSE
	0.5	147	4	121.839	-2.63527	75.241	4.55462e-05	0.999954	0.00191491	0.998085	FALSE	FALSE
	0.5	147	5	83.3979	-15.4138	164.143	0.000465433	0.999535	0.742163	0.257837	FALSE	FALSE
	0.5	147	6	102.301	-21.2307	155.264	0.000114861	0.999885	0.606646	0.393354	FALSE	FALSE
	0.5	147	7	47.2588	-16.3447	150.831	0.00320402	0.996796	0.941261	0.0587387	FALSE	FALSE
	0.5	147	8	73.5714	-13.6096	131.11	0.000153775	0.999846	0.598507	0.401493	FALSE	FALSE
	0.5	147	9	26.8469	-13.9876	202.801	0.147264	0.852736	0.995105	0.00489455	FALSE	FALSE
	0.5	147	10	83.5748	-8.35826	129.922	0.000320049	0.99968	0.312682	0.687318	FALSE	FALSE
	0.5	147	11	97.4116	-13.0038	104.813	0.000256252	0.999744	0.112767	0.887233	FALSE	FALSE
	0.5	147	12	58.2328	-16.9094	172.854	0.00123515	0.998765	0.954393	0.0456073	FALSE	FALSE
	0.5	147	13	17.0037	1.11526	183.377	0.255158	0.744842	0.999019	0.00098132	FALSE	FALSE
	0.5	147	14	33.5256	-22.8662	171.526	0.00575562	0.994244	0.9951	0.00489986	FALSE	FALSE
	0.5	147	15	14.2149	-13.5311	168.44	0.999061	0.000938543	0.978653	0.021347	TRUE	FALSE
	0.5	147	16	16.0981	-24.743	254.502	0.999982	1.80879e-05	0.999876	0.000124223	TRUE	FALSE
	0.5	147	17	69.3564	-22.2557	236.112	0.00122566	0.998774	0.99813	0.00186977	FALSE	FALSE
	0.5	147	18	77.2659	-19.3393	200.379	0.000249417	0.999751	0.971768	0.0282322	FALSE	FALSE
	0.5	148	1	124.136	-6.34792	45.0192	5.42219e-05	0.999946	0.00130588	0.998694	FALSE	FALSE
	0.5	148	2	81.6486	-13.0447	97.2502	0.000254099	0.999746	0.308391	0.691609	FALSE	FALSE
	0.5	148	3	104.625	-14.6257	124.591	1.45866e-05	0.999985	0.116111	0.883889	FALSE	FALSE
	0.5	148	4	159.173	-14.0536	108.477	3.67846e-06	0.999996	0.000148174	0.999852	FALSE	FALSE
	0.5	148	5	130.504	-7.4786	125.162	1.27906e-05	0.999987	0.00525644	0.994744	FALSE	FALSE
	0.5	148	6	160.498	5.00206	22.6342	1.07689e-05	0.999989	3.80335e-06	0.999996	FALSE	FALSE
	0.5	148	7	113.562	-9.72429	72.3447	7.35806e-05	0.999926	0.00934301	0.990657	FALSE	FALSE
	0.5	148	8	89.8854	2.31777	111.033	2.96467e-05	0.99997	0.249645	0.750355	FALSE	FALSE
	0.5	148	9	32.0027	-11.3818	167.307	0.000169614	0.99983	0.966393	0.0336071	FALSE	FALSE
	0.5	148	10	71.6763	-9.60378	136.714	0.000143064	0.999857	0.575813	0.424187	FALSE	FALSE
	0.5	148	11	63.7973	-17.4641	143.207	0.000631563	0.999368	0.883222	0.116778	FALSE	FALSE
	0.5	148	12	185.83	0.446798	16.1298	2.23113e-06	0.999998	6.00233e-08	1	FALSE	FALSE
	0.5	148	13	55.225	-18.9297	165.349	0.00117738	0.998823	0.964308	0.0356923	FALSE	FALSE
	0.5	148	14	40.8168	-19.2525	154.391	0.00593919	0.994061	0.97729	0.0227103	FALSE	FALSE
	0.5	148	15	149.454	-3.90461	38.8868	1.70776e-05	0.999983	3.28561e-05	0.999967	FALSE	FALSE
	0.5	148	16	32.4466	-17.0757	176.94	0.00784042	0.99216	0.984708	0.0152916	FALSE	FALSE
	0.5	148	17	80.535	-7.12572	73.9474	0.000868108	0.999132	0.113087	0.886913	FALSE	FALSE
	0.5	148	18	69.1983	-19.4867	147.005	0.000124919	0.999875	0.907331	0.0926685	FALSE	FALSE
	0.5	148	19	56.0899	-24.5141	209.381	0.0011199	0.99888	0.997279	0.00272148	FALSE	FALSE
	0.5	148	20	58.7149	-17.2008	135.925	0.00191529	0.998085	0.8937	0.1063	FALSE	FALSE
	0.5	148	21	64.3032	-16.1313	117.352	0.00253907	0.997461	0.791646	0.208354	FALSE	FALSE
	0.5	148	22	56.0571	-16.023	142.844	0.00363971	0.99636	0.89308	0.10692	FALSE	FALSE
	0.5	148	23	12.1393	-22.6167	195.585	0.999925	7.51863e-05	0.9979	0.00209965	TRUE	FALSE
	0.5	149	1	159.128	-2.51777	42.7314	1.6034e-05	0.999984	7.59712e-06	0.999992	FALSE	FALSE
	0.5	149	2	163.67	-0.911396	36.2268	1.65119e-05	0.999983	3.11585e-06	0.999997	FALSE	FALSE
	0.5	149	3	94.1896	-2.76629	119.736	3.11084e-05	0.999969	0.143074	0.856926	FALSE	FALSE
	0.5	149	4	20.9086	-3.54703	175.886	0.00308109	0.996919	0.992576	0.00742367	FALSE	FALSE
	0.5	149	5	131.992	-7.42406	137.668	7.06289e-06	0.999993	0.0086946	0.991305	FALSE	FALSE
	0.5	149	6	189.292	-4.9585	49.7741	3.33339e-06	0.999997	9.63265e-08	1	FALSE	FALSE
	0.5	149	7	138.737	3.12669	39.5456	4.87953e-05	0.999951	0.000105664	0.999894	FALSE	FALSE
	0.5	149	8	126.055	2.77155	27.3617	7.47788e-05	0.999925	0.000371274	0.999629	FALSE	FALSE
	0.5	149	9	137.331	1.85473	42.618	4.43689e-05	0.999956	0.000129858	0.99987	FALSE	FALSE
	0.5	149	10	103.923	3.38625	48.361	3.77039e-05	0.999962	0.00670308	0.993297	FALSE	FALSE
	0.5	149	11	166.914	-6.55943	112.743	1.08228e-05	0.999989	3.0809e-05	0.999969	FALSE	FALSE
	0.5	149	12	43.9361	-24.6155	182.762	0.00137174	0.998628	0.996638	0.00336192	FALSE	FALSE
	0.5	149	13	54.4414	-19.9643	164.679	0.000209959	0.99979	0.972197	0.0278033	FALSE	FALSE
	0.5	149	14	74.5408	-10.0307	126.382	0.000476445	0.999524	0.444996	0.555004	FALSE	FALSE
	0.5	149	15	36.2324	-7.88365	155.894	0.00306912	0.996931	0.941083	0.0589167	FALSE	FALSE
	0.5	149	16	30.907	-16.421	175.66	0.034353	0.965647	0.983255	0.0167453	FALSE	FALSE
	0.5	149	17	10.6167	-35.4197	241.08	0.999999	7.78106e-07	0.999991	8.57301e-06	TRUE	FALSE
	2	150	1	182.995	2.13591	119.184	2.0678e-06	0.999998	1.84936e-05	0.999982	FALSE	FALSE
	2	150	2	124.375	-3.68468	147.141	9.67632e-06	0.99999	0.0533717	0.946628	FALSE	FALSE
	2	150	3	198.505	7.31532	31.1074	8.58851e-07	0.999999	1.607e-08	1	FALSE	FALSE
	2	150	4	183.781	-4.26949	45.1819	3.50184e-06	0.999996	2.05124e-07	1	FALSE	FALSE
	2	150	5	12.4946	-7.90628	212.774	0.999223	0.000777312	0.998913	0.00108709	TRUE	FALSE
	2	150	6	33.4871	-22.3553	180.599	0.0130476	0.986952	0.995165	0.00483492	FALSE	FALSE
	2	150	7	21.467	-16.6441	243.467	0.0248909	0.975109	0.999664	0.000336181	FALSE	FALSE
	2	150	8	88.5988	1.64866	114.318	9.54774e-06	0.99999	0.279142	0.720858	FALSE	FALSE
	2	150	9	11.4235	-14.5292	264.332	0.999987	1.26539e-05	0.999955	4.49618e-05	TRUE	FALSE
	2	151	1	41.6209	-5.24493	146.845	0.00274701	0.997253	0.912109	0.0878909	FALSE	FALSE
	2	151	2	81.2166	-21.492	150.283	0.000803064	0.999197	0.892367	0.107633	FALSE	FALSE
	2	151	3	35.7049	-21.603	146.736	0.00938865	0.990611	0.990096	0.00990413	FALSE	FALSE
	2	151	4	33.4792	-9.46452	91.0661	0.149839	0.850161	0.771998	0.228002	FALSE	FALSE
	2	151	5	97.2901	-16.4189	145.801	8.48753e-06	0.999992	0.377875	0.622125	FALSE	FALSE
	2	151	6	40.0226	-18.2388	169.658	0.0110708	0.988929	0.980099	0.0199007	FALSE	FALSE
	2	151	7	49.9756	-22.3838	235.064	0.00029116	0.999709	0.999091	0.000908974	FALSE	FALSE
	2	151	8	102.216	-9.1986	142.663	3.97598e-06	0.999996	0.159708	0.840292	FALSE	FALSE
	2	151	9	8.77947	-36.1777	262.704	0.999994	5.70039e-06	0.999996	3.83715e-06	TRUE	FALSE
	2	152	1	150.685	-9.27743	71.33	1.67989e-05	0.999983	0.00158144	0.998419	FALSE	FALSE
	2	152	2	141.231	-11.4688	91.3637	1.81674e-05	0.999982	0.000672256	0.999328	FALSE	FALSE
	2	152	3	75.3576	-21.6884	153.905	5.02514e-05	0.99995	0.933197	0.0668035	FALSE	FALSE
	2	152	4	97.4323	-4.644	141.571	2.83028e-05	0.999972	0.265673	0.734327	FALSE	FALSE
	2	152	5	71.0448	-7.28745	125.227	0.000144524	0.999855	0.462279	0.537721	FALSE	FALSE
	2	152	6	34.1011	-10.2582	161.947	0.000833413	0.999167	0.954944	0.0450564	FALSE	FALSE
	2	152	7	63.7572	-16.8168	162.778	0.000152964	0.999847	0.916435	0.0835654	FALSE	FALSE
	2	152	8	38.7416	-18.9169	198.786	0.0020456	0.997954	0.993909	0.00609127	FALSE	FALSE
	2	152	9	89.3425	-20.0053	132.075	0.00028435	0.999716	0.692096	0.307904	FALSE	FALSE
	2	152	10	69.2846	-15.2552	104.377	0.000456045	0.999544	0.670781	0.329219	FALSE	FALSE
	2	152	11	25.6571	-2.6106	167.836	0.0252714	0.974729	0.988645	0.0113554	FALSE	FALSE
	2	152	12	5.50693	-23.6691	189.54	0.999399	0.000600913	0.998285	0.00171547	TRUE	FALSE
	2	152	13	70.9078	-10.9212	107.285	0.000363172	0.999637	0.415504	0.584496	FALSE	FALSE
	2	152	14	10.0425	-34.9213	247.734	0.19046	0.80954	0.999991	9.42309e-06	FALSE	FALSE
	2	152	15	12.1126	-18.4261	234.17	0.999803	0.000197412	0.999347	0.000652762	TRUE	FALSE
	2	152	16	82.9067	-19.6165	141.346	8.62497e-05	0.999914	0.785237	0.214763	FALSE	FALSE
	2	152	17	62.6456	-33.5163	210.794	5.30794e-05	0.999947	0.999852	0.000147521	FALSE	FALSE
	2	152	18	33.8102	-23.388	220.228	0.00385685	0.996143	0.998926	0.0010738	FALSE	FALSE
	2	153	1	41.479	-13.9912	182.325	0.000261728	0.999738	0.979465	0.0205353	FALSE	FALSE
	2	153	2	40.0705	-33.3695	229.227	0.000341131	0.999659	0.999954	4.56798e-05	FALSE	FALSE
	2	153	3	70.2414	-26.7413	200.539	4.53626e-05	0.999955	0.996025	0.00397494	FALSE	FALSE
	2	153	4	130.468	-13.6242	96.7602	3.51926e-06	0.999996	0.00426486	0.995735	FALSE	FALSE
	2	153	5	34.5175	-28.5301	207.988	0.00273748	0.997263	0.9996	0.000399792	FALSE	FALSE
	2	153	6	186.119	-15.6226	116.602	6.24958e-07	0.999999	4.57294e-06	0.999995	FALSE	FALSE
	2	153	7	52.4463	-29.3808	210.526	0.000627431	0.999373	0.999478	0.000521543	FALSE	FALSE
	2	153	8	45.1077	-25.3122	200.938	0.00874022	0.99126	0.998119	0.00188107	FALSE	FALSE
	2	153	9	47.1911	-30.2055	188.718	0.000111884	0.999888	0.999596	0.00040391	FALSE	FALSE
	2	153	10	7.21827	-33.227	260.813	0.999989	1.14104e-05	0.999987	1.25488e-05	TRUE	FALSE
	2	153	11	280.64	-4.67265	53.0981	1.09154e-07	1	7.74708e-16	1	FALSE	FALSE
	2	153	12	45.9281	-37.825	270.092	0.00260918	0.997391	0.999997	2.75458e-06	FALSE	FALSE
	2	153	13	63.8086	-15.514	161.031	0.000289425	0.999711	0.895268	0.104732	FALSE	FALSE
	2	153	14	18.2528	-24.01	206.516	0.98876	0.0112404	0.998825	0.0011746	TRUE	FALSE
	1	154	1	120.614	-2.28302	57.6865	0.00016674	0.999833	0.0152166	0.984783	FALSE	FALSE
	1	154	2	84.2102	3.47944	53.5569	9.63231e-05	0.999904	0.0432054	0.956795	FALSE	FALSE
	1	154	3	137.5	0.826869	57.7943	1.07042e-05	0.999989	0.000192486	0.999808	FALSE	FALSE
	1	154	4	90.7874	-10.0136	101.331	0.000202045	0.999798	0.111312	0.888688	FALSE	FALSE
	1	154	5	136.481	-5.64313	71.2551	3.2106e-05	0.999968	0.000361994	0.999638	FALSE	FALSE
	1	154	6	44.6348	-6.04035	134.9	0.0005224	0.999478	0.831319	0.168681	FALSE	FALSE
	1	154	7	4.67113	-19.2377	160.771	1	2.59209e-08	0.990899	0.00910056	TRUE	FALSE
	1	155	1	155.135	2.71591	21.9025	1.67036e-05	0.999983	0.00104224	0.998958	FALSE	FALSE
	1	155	2	97.2288	0.831037	54.2058	4.21852e-05	0.999958	0.0129816	0.987018	FALSE	FALSE
	1	155	3	78.9449	-15.6466	156.063	3.52031e-05	0.999965	0.74667	0.25333	FALSE	FALSE
	1	155	4	70.8656	-24.4594	179.223	0.000340421	0.99966	0.985895	0.0141047	FALSE	FALSE
	1	155	5	159.83	-12.5761	137.303	3.81072e-06	0.999996	0.00030973	0.99969	FALSE	FALSE
	1	155	6	36.6257	-15.1074	203.091	0.000114759	0.999885	0.994116	0.00588442	FALSE	FALSE
	1	155	7	83.658	4.98503	120.507	7.03095e-05	0.99993	0.673013	0.326987	FALSE	FALSE
	1	155	8	57.0308	-13.3033	128.431	0.000265898	0.999734	0.781148	0.218852	FALSE	FALSE
	1	155	9	78.2989	-10.5651	128.178	0.000102777	0.999897	0.407789	0.592211	FALSE	FALSE
	1	155	10	99.4148	0.0415061	108.006	6.87079e-05	0.999931	0.0779451	0.922055	FALSE	FALSE
	1	155	11	91.1074	1.98236	49.3206	0.000109313	0.999891	0.0204527	0.979547	FALSE	FALSE
	1	155	12	57.1308	-13.5986	188.155	0.00104139	0.998959	0.973229	0.0267715	FALSE	FALSE
	1	155	13	81.133	-20.1057	179.172	8.67225e-05	0.999913	0.92342	0.0765797	FALSE	FALSE
	1	155	14	101.225	-5.00172	161.162	8.61544e-06	0.999991	0.489738	0.510262	FALSE	FALSE
	1	155	15	124.217	-1.06671	49.2202	1.59131e-05	0.999984	0.000737211	0.999263	FALSE	FALSE
	1	155	16	110.642	-25.1197	162.611	1.82604e-05	0.999982	0.744093	0.255907	FALSE	FALSE
	1	155	17	51.5439	-32.8198	242.355	9.55967e-05	0.999904	0.99994	5.97222e-05	FALSE	FALSE
	1	155	18	124.181	-19.6434	204.342	1.22692e-05	0.999988	0.539744	0.460256	FALSE	FALSE
	1	155	19	91.5369	-20.1686	185.382	0.00011853	0.999881	0.882384	0.117616	FALSE	FALSE
	1	155	20	35.5669	-27.8008	179.334	0.000630604	0.999369	0.999213	0.000786949	FALSE	FALSE
	1	155	21	25.6768	-19.7285	170.361	0.0110293	0.988971	0.990483	0.00951711	FALSE	FALSE
	1	155	22	278.232	-1.59088	39.7787	9.81576e-08	1	7.50022e-16	1	FALSE	FALSE
	1	155	23	269.807	-9.6945	64.1009	9.32661e-08	1	2.46493e-14	1	FALSE	FALSE
	1	156	1	146.948	2.69676	15.8851	2.42719e-06	0.999998	0.002165	0.997835	FALSE	FALSE
	1	156	2	96.9718	-7.74675	111.376	0.0001168	0.999883	0.0726153	0.927385	FALSE	FALSE
	1	156	3	28.1881	-15.1692	272.85	0.0585428	0.941457	0.999978	2.1732e-05	FALSE	FALSE
	1	156	4	158.696	0.208068	51.1965	1.97152e-05	0.99998	9.20983e-06	0.999991	FALSE	FALSE
	1	156	5	21.3903	-18.3256	167.526	0.197328	0.802672	0.987437	0.0125631	FALSE	FALSE
	1	156	6	21.5219	-13.0121	124.327	0.960541	0.0394586	0.927127	0.0728733	TRUE	FALSE
	1	156	7	173.858	-4.47008	125.575	6.41319e-07	0.999999	2.85964e-05	0.999971	FALSE	FALSE
	1	156	8	92.5776	-20.7132	194.128	8.38502e-05	0.999916	0.917595	0.0824052	FALSE	FALSE
	1	156	9	9.32601	7.22539	50.6097	0.99971	0.000289797	0.721241	0.278759	TRUE	FALSE
	1	156	10	37.1494	-16.9282	189.184	0.0148155	0.985184	0.989028	0.0109718	FALSE	FALSE
	1	156	11	18.1311	-26.7841	246.647	0.48698	0.51302	0.999865	0.000134748	FALSE	FALSE
	1	156	12	54.5548	-6.12831	192.317	0.00271658	0.997283	0.991894	0.00810624	FALSE	FALSE
	1	156	13	149.217	-16.1187	124.676	5.30292e-06	0.999995	0.00128877	0.998711	FALSE	FALSE
	1	156	14	157.772	-15.5778	113.025	8.07082e-06	0.999992	0.000276441	0.999724	FALSE	FALSE
	1	156	15	135.421	-11.6486	181.221	2.5868e-06	0.999997	0.0725213	0.927479	FALSE	FALSE
	1	156	16	208.235	-10.327	79.9541	7.08242e-07	0.999999	1.45486e-08	1	FALSE	FALSE
	5	157	1	154.912	-8.90777	64.2983	5.09124e-06	0.999995	0.00106544	0.998935	FALSE	FALSE
	5	157	2	179.844	-2.42061	40.1673	1.6167e-06	0.999998	2.99895e-07	1	FALSE	FALSE
	5	157	3	60.3465	-25.1655	256.554	0.000254988	0.999745	0.999742	0.000257723	FALSE	FALSE
	5	157	4	84.564	-19.791	213.995	7.27466e-05	0.999927	0.979931	0.0200691	FALSE	FALSE
	5	157	5	224.014	-0.73177	135.712	2.67246e-07	1	4.36276e-08	1	FALSE	FALSE
	5	157	6	213.116	-11.3969	100.726	3.45835e-07	1	1.35366e-08	1	FALSE	FALSE
	5	157	7	67.7956	1.28888	229.041	0.000146031	0.999854	0.999983	1.66521e-05	FALSE	FALSE
	5	157	8	36.6844	-27.3478	167.918	0.00392929	0.996071	0.99898	0.00101958	FALSE	FALSE
	5	157	9	52.4625	-12.5438	170.679	0.000463835	0.999536	0.945856	0.0541439	FALSE	FALSE
	5	157	10	37.2538	-10.3465	190.631	0.00467615	0.995324	0.989588	0.0104124	FALSE	FALSE
	5	157	11	34.8979	-33.39	227.995	0.00171359	0.998286	0.99996	3.99056e-05	FALSE	FALSE
	5	157	12	28.6782	-23.7199	169.84	0.0218441	0.978156	0.996724	0.00327611	FALSE	FALSE
	5	157	13	25.4888	-16.0036	147.005	0.0377557	0.962244	0.96682	0.0331803	FALSE	FALSE
	5	157	14	34.8664	-24.5679	180.798	0.0303788	0.969621	0.997424	0.00257634	FALSE	FALSE
	5	157	15	43.1524	-32.7	246.229	0.0026795	0.99732	0.999959	4.14261e-05	FALSE	FALSE
	5	157	16	21.728	-31.032	194.403	0.00426007	0.99574	0.999881	0.000119059	FALSE	FALSE
	5	157	17	12.841	-35.0574	225.745	0.999971	2.94395e-05	0.999988	1.24768e-05	TRUE	FALSE
	5	157	18	58.8414	-24.6074	303.308	0.0372762	0.962724	0.999994	5.72321e-06	FALSE	FALSE
	5	157	19	60.2707	-18.2052	180.921	0.00036379	0.999636	0.968698	0.0313024	FALSE	FALSE
	5	157	20	64.0007	-15.3656	151.681	0.00129828	0.998702	0.859303	0.140697	FALSE	FALSE
	5	157	21	11.126	-6.12079	194.298	0.999813	0.00018674	0.996845	0.00315516	TRUE	FALSE
	5	158	1	100.028	6.92607	18.7406	6.24364e-05	0.999938	0.312461	0.687539	FALSE	FALSE
	5	158	2	54.343	-7.70044	298.31	0.0023472	0.997653	1	9.92683e-08	FALSE	FALSE
	5	158	3	58.9766	-26.2488	217.732	0.000528227	0.999472	0.998522	0.00147763	FALSE	FALSE
	5	158	4	92.8338	13.8051	55.5784	6.14657e-06	0.999994	0.208487	0.791513	FALSE	FALSE
	5	158	5	38.1619	-42.1385	280.638	0.00184666	0.998153	1	2.15379e-07	FALSE	FALSE
	5	158	6	42.2655	-14.9354	224.808	0.00214976	0.99785	0.998372	0.00162828	FALSE	FALSE
	5	158	7	34.5387	-25.4753	180.914	0.0220906	0.977909	0.998137	0.00186312	FALSE	FALSE
	5	158	8	33.222	-18.1252	212.649	0.141676	0.858324	0.997098	0.00290169	FALSE	FALSE
	5	158	9	25.94	-3.82388	152.35	0.0151054	0.984895	0.962074	0.0379264	FALSE	FALSE
	5	158	10	122.598	-4.01062	89.9668	2.08753e-05	0.999979	0.00288176	0.997118	FALSE	FALSE
	5	158	11	17.0395	-32.2107	218.848	0.160021	0.839979	0.999947	5.3376e-05	FALSE	FALSE
	5	158	12	35.3868	-20.2464	149.358	0.0107217	0.989278	0.984988	0.0150124	FALSE	FALSE
	5	158	13	12.4515	-19.3948	252.574	0.999964	3.61525e-05	0.99981	0.000189634	TRUE	FALSE
	5	158	14	11.4918	-25.9755	304.918	0.998032	0.00196818	0.999997	3.26395e-06	TRUE	FALSE
	5	158	15	24.5513	-19.6475	161.567	0.360123	0.639877	0.988867	0.0111327	FALSE	FALSE
	5	158	16	40.9089	-10.3383	103.061	0.0142434	0.985757	0.760678	0.239322	FALSE	FALSE
	5	158	17	11.1378	-16.4137	139.884	0.996708	0.00329157	0.974984	0.0250156	TRUE	FALSE
	5	159	1	151.004	-5.21814	153.055	1.90996e-06	0.999998	0.00364901	0.996351	FALSE	FALSE
	5	159	2	208.311	0.608607	140.453	9.10965e-07	0.999999	1.52392e-06	0.999998	FALSE	FALSE
	5	159	3	18.9625	-10.6245	314.506	0.000878404	0.999122	1	3.74661e-08	FALSE	FALSE
	5	159	4	42.4823	-34.628	279.972	0.00731744	0.992683	0.999995	5.39842e-06	FALSE	FALSE
	5	159	5	163.185	-21.956	154.817	2.44994e-06	0.999998	0.00195779	0.998042	FALSE	FALSE
	5	159	6	168.603	-3.95403	65.422	4.81334e-06	0.999995	3.52206e-06	0.999996	FALSE	FALSE
	5	159	7	163.954	-6.99756	103.769	6.00908e-06	0.999994	3.04957e-05	0.99997	FALSE	FALSE
	5	159	8	169.491	2.75992	18.9869	1.34433e-05	0.999987	8.32128e-07	0.999999	FALSE	FALSE
	5	159	9	95.8936	-8.43399	118.779	7.31295e-05	0.999927	0.102722	0.897278	FALSE	FALSE
	5	159	10	175.513	-4.43542	66.5326	3.36483e-06	0.999997	1.3056e-06	0.999999	FALSE	FALSE
	5	159	11	158.83	-5.58034	57.3903	1.13901e-05	0.999989	1.38973e-05	0.999986	FALSE	FALSE
	5	159	12	111.575	-11.2519	82.8669	6.67288e-05	0.999933	0.0171308	0.982869	FALSE	FALSE
	5	159	13	112.511	-5.571	80.3637	0.000113889	0.999886	0.0065566	0.993443	FALSE	FALSE
	5	159	14	162.838	0.285975	117.975	2.00655e-05	0.99998	0.000175485	0.999825	FALSE	FALSE
	5	159	15	91.2517	-3.27078	84.7249	8.86652e-05	0.999911	0.0463807	0.953619	FALSE	FALSE
	5	159	16	111.598	-12.5496	93.558	4.49506e-05	0.999955	0.0250396	0.97496	FALSE	FALSE
	5	159	17	125.653	-0.0114111	86.218	3.63416e-05	0.999964	0.0022059	0.997794	FALSE	FALSE
	5	159	18	47.9507	-10.3099	150.438	0.00407575	0.995924	0.889401	0.110599	FALSE	FALSE
	5	159	19	10.6494	-17.1057	130.246	0.999996	3.74479e-06	0.978145	0.0218545	TRUE	FALSE
	5	160	1	112.404	-9.79409	113.49	3.56487e-05	0.999964	0.0228879	0.977112	FALSE	FALSE
	5	160	2	182.913	-6.67254	48.7595	2.69041e-06	0.999997	3.46331e-07	1	FALSE	FALSE
	5	160	3	51.932	-29.4063	248.577	0.00409012	0.99591	0.999863	0.000136987	FALSE	FALSE
	5	160	4	46.5603	-31.6892	240.389	0.0167155	0.983284	0.99992	7.98142e-05	FALSE	FALSE
	5	160	5	10.2637	-45.9239	306.396	1	1.43716e-07	1	1.06154e-08	TRUE	FALSE
	5	160	6	13.0505	-36.2445	274.986	0.999371	0.000629077	0.999997	2.57296e-06	TRUE	FALSE
	3	161	1	67.3006	-3.47671	206.848	0.000409788	0.99959	0.998302	0.00169833	FALSE	FALSE
	3	161	2	138.515	-15.313	128.65	7.22868e-06	0.999993	0.00460548	0.995395	FALSE	FALSE
	3	161	3	85.9734	-27.119	211.279	4.17677e-05	0.999958	0.99329	0.00670986	FALSE	FALSE
	3	161	4	87.2659	-7.27035	213.461	2.60741e-05	0.999974	0.992401	0.00759929	FALSE	FALSE
	3	161	5	137.354	13.8287	15.129	2.97421e-06	0.999997	0.00030513	0.999695	FALSE	FALSE
	3	161	6	84.0276	-8.89095	256.984	0.00166158	0.998338	0.999903	9.68329e-05	FALSE	FALSE
	3	161	7	237.589	0.376214	31.4056	1.89246e-07	1	4.96693e-12	1	FALSE	FALSE
	3	161	8	160.283	-15.4232	221.976	2.26945e-06	0.999998	0.0884182	0.911582	FALSE	FALSE
	3	161	9	144.713	-23.6515	224.568	1.66448e-05	0.999983	0.432929	0.567071	FALSE	FALSE
	3	161	10	197.181	-5.94755	65.376	2.89833e-06	0.999997	4.04056e-08	1	FALSE	FALSE
	3	161	11	175.634	-7.95041	64.6313	5.43697e-06	0.999995	1.75526e-06	0.999998	FALSE	FALSE
	3	161	12	174.137	-5.73444	86.7692	7.86398e-06	0.999992	3.38202e-06	0.999997	FALSE	FALSE
	3	161	13	169.703	-5.03471	72.0611	1.71952e-06	0.999998	3.84734e-06	0.999996	FALSE	FALSE
	3	161	14	76.1878	-26.1205	231.25	0.000351234	0.999649	0.998001	0.00199922	FALSE	FALSE
	3	161	15	93.0897	-23.0537	201.931	7.73462e-05	0.999923	0.958456	0.0415437	FALSE	FALSE
	3	161	16	211.946	-5.09881	62.7989	1.22312e-06	0.999999	2.50778e-09	1	FALSE	FALSE
	3	161	17	224.523	-8.28711	124.632	9.84762e-07	0.999999	4.93205e-09	1	FALSE	FALSE
	3	161	18	108.375	-17.9372	130.495	5.30104e-06	0.999995	0.181217	0.818783	FALSE	FALSE
	3	161	19	152.752	4.10755	116.567	8.95222e-06	0.999991	0.00162387	0.998376	FALSE	FALSE
	3	161	20	128.381	6.08066	48.9246	5.71149e-06	0.999994	0.000709306	0.999291	FALSE	FALSE
	3	161	21	14.4364	-13.3447	114.721	0.799403	0.200597	0.937212	0.0627881	FALSE	FALSE
	3	161	22	5.39379	-17.0343	145.546	0.999996	3.64143e-06	0.98105	0.0189497	TRUE	FALSE
	3	162	1	213.869	-11.3281	41.6123	3.67364e-08	1	1.14875e-07	1	FALSE	FALSE
	3	162	2	138.768	-12.7654	116.595	1.39764e-05	0.999986	0.00205975	0.99794	FALSE	FALSE
	3	162	3	175.55	-13.0597	115.317	1.54576e-06	0.999998	1.44261e-05	0.999986	FALSE	FALSE
	3	162	4	62.0668	3.97845	194.422	0.00050603	0.999494	0.999777	0.000222725	FALSE	FALSE
	3	162	5	183.652	-14.0691	138.796	8.01435e-07	0.999999	1.25523e-05	0.999987	FALSE	FALSE
	3	162	6	132.214	5.33935	16.0575	1.25313e-05	0.999987	0.00015144	0.999849	FALSE	FALSE
	3	162	7	109.964	-15.1457	120.489	1.81354e-05	0.999982	0.0746832	0.925317	FALSE	FALSE
	3	162	8	196.766	-11.814	96.8741	1.39141e-06	0.999999	2.22107e-07	1	FALSE	FALSE
	3	162	9	121.716	-0.831499	160.994	9.40252e-06	0.999991	0.311228	0.688772	FALSE	FALSE
	3	162	10	79.3507	-14.1598	194.115	5.79971e-05	0.999942	0.943608	0.0563918	FALSE	FALSE
	3	162	11	4.89636	0.967283	174.884	1	1.56532e-07	0.997842	0.00215802	TRUE	FALSE
	3	162	12	83.5899	-22.6382	214.93	0.000122568	0.999877	0.986988	0.013012	FALSE	FALSE
	3	162	13	91.7923	-35.7382	208.624	9.95763e-08	1	0.999673	0.000327344	FALSE	FALSE
	3	162	14	157.289	-5.74725	94.0864	4.65407e-06	0.999995	5.00618e-05	0.99995	FALSE	FALSE
	3	162	15	96.7433	-20.4393	152.355	1.80693e-05	0.999982	0.652124	0.347876	FALSE	FALSE
	3	162	16	122.387	-12.5182	131.108	0.000477934	0.999522	0.0198554	0.980145	FALSE	FALSE
	3	162	17	30.4409	-8.98006	250.777	0.00309932	0.996901	0.999955	4.45035e-05	FALSE	FALSE
	3	162	18	99.9994	-32.4469	202.422	1.45123e-06	0.999999	0.996565	0.0034353	FALSE	FALSE
	3	163	1	87.8704	-15.8217	109.001	2.21205e-05	0.999978	0.510003	0.489997	FALSE	FALSE
	3	163	2	143.119	-18.034	151.663	2.10183e-06	0.999998	0.00932038	0.99068	FALSE	FALSE
	3	163	3	189.98	-3.6583	90.5018	5.82584e-07	0.999999	3.45577e-07	1	FALSE	FALSE
	3	163	4	72.664	-27.9285	223.63	0.00015794	0.999842	0.998509	0.00149122	FALSE	FALSE
	3	163	5	35.2542	-22.119	212.804	0.000438548	0.999561	0.998092	0.00190815	FALSE	FALSE
	3	163	6	72.5733	-21.3206	172.316	1.90097e-05	0.999981	0.956464	0.0435356	FALSE	FALSE
	3	163	7	64.7651	-13.4839	148.477	0.000571819	0.999428	0.805155	0.194845	FALSE	FALSE
	3	163	8	73.1708	-27.1559	181.447	0.000469089	0.999531	0.993865	0.00613456	FALSE	FALSE
	3	163	9	31.6421	-39.0634	249.687	0.0227284	0.977272	0.999998	1.69507e-06	FALSE	FALSE
	3	163	10	4.89351	-8.66711	157.167	0.999963	3.65545e-05	0.964813	0.0351868	TRUE	FALSE
	3	163	11	88.6657	-0.582642	113.852	2.60032e-05	0.999974	0.19894	0.80106	FALSE	FALSE
	3	163	12	137.452	2.78175	105.336	5.50318e-06	0.999994	0.00290444	0.997096	FALSE	FALSE
	3	163	13	186.038	-1.65777	101.118	8.01035e-07	0.999999	1.39986e-06	0.999999	FALSE	FALSE
	3	163	14	119.424	-0.0598714	133.699	8.72198e-06	0.999991	0.0682311	0.931769	FALSE	FALSE
	3	163	15	118.386	9.98205	5.32131	1.14518e-05	0.999989	0.000932535	0.999067	FALSE	FALSE
	3	163	16	93.3413	-26.593	202.979	8.33264e-06	0.999992	0.982541	0.0174588	FALSE	FALSE
	3	163	17	58.246	-18.3111	236.381	0.000552494	0.999448	0.998683	0.00131714	FALSE	FALSE
	3	163	18	47.3022	-19.3327	273.725	7.11643e-06	0.999993	0.999953	4.73171e-05	FALSE	FALSE
	3	163	19	66.8396	-32.0422	213.164	8.29619e-05	0.999917	0.999655	0.000345391	FALSE	FALSE
	3	163	20	49.1455	-31.1949	253.814	0.0111811	0.988819	0.999939	6.06449e-05	FALSE	FALSE
	3	163	21	16.8372	-11.161	202.021	0.999309	0.000690854	0.996064	0.0039363	TRUE	FALSE
	3	164	1	152.766	-0.600792	17.5803	3.6596e-06	0.999996	0.00130902	0.998691	FALSE	FALSE
	3	164	2	58.6914	-25.4122	248.985	0.00131462	0.998685	0.999623	0.000376721	FALSE	FALSE
	3	164	3	243.917	-13.2561	97.688	2.09286e-07	1	3.93972e-11	1	FALSE	FALSE
	3	164	4	144.083	-1.96677	176.325	1.34615e-05	0.999987	0.125596	0.874404	FALSE	FALSE
	3	164	5	17.726	-33.465	308.345	0.91817	0.0818304	0.999999	1.09358e-06	TRUE	FALSE
	3	164	6	113.69	-0.540374	51.4068	0.000151071	0.999849	0.00242703	0.997573	FALSE	FALSE
	3	164	7	28.0074	-21.1499	232.008	0.204492	0.795508	0.999273	0.000726677	FALSE	FALSE
	3	164	8	10.8451	-2.05447	181.97	1	2.66812e-07	0.996948	0.00305226	TRUE	FALSE
	3	164	9	39.7902	-6.79377	204.34	0.00201147	0.997989	0.997715	0.00228514	FALSE	FALSE
	0.3	165	1	234.331	6.42393	18.0445	4.00879e-07	1	8.8454e-12	1	FALSE	FALSE
	0.3	165	2	216.543	-1.33841	43.5702	1.33362e-06	0.999999	4.92622e-10	1	FALSE	FALSE
	0.3	165	3	154.086	-7.7751	161.693	1.84928e-05	0.999982	0.00329373	0.996706	FALSE	FALSE
	0.3	165	4	259.64	-0.726131	77.5297	1.63339e-07	1	3.95464e-13	1	FALSE	FALSE
	0.3	165	5	160.029	-13.2374	152.786	1.86197e-06	0.999998	0.000686966	0.999313	FALSE	FALSE
	0.3	165	6	215.821	-6.55684	70.7254	1.13626e-06	0.999999	1.75493e-09	1	FALSE	FALSE
	0.3	165	7	195.181	-5.8118	107.975	7.889e-07	0.999999	3.36626e-07	1	FALSE	FALSE
	0.3	165	8	231.864	-11.2809	128.59	2.76075e-07	1	1.54275e-09	1	FALSE	FALSE
	0.3	165	9	183.529	-4.67282	113.114	1.41679e-07	1	3.06607e-06	0.999997	FALSE	FALSE
	0.3	165	10	264.953	-0.445292	43.7851	1.75545e-07	1	2.02377e-14	1	FALSE	FALSE
	0.3	165	11	217.409	-2.09687	65.4552	3.28561e-07	1	9.58057e-10	1	FALSE	FALSE
	0.3	165	12	198.552	-9.03994	75.8231	6.85591e-07	0.999999	6.0017e-08	1	FALSE	FALSE
	0.3	165	13	182.888	-6.2937	78.5524	1.24984e-06	0.999999	6.67343e-07	0.999999	FALSE	FALSE
	0.3	165	14	224.994	-5.61357	54.2354	3.91922e-07	1	1.67821e-10	1	FALSE	FALSE
	0.3	165	15	213.615	-5.28656	84.3005	2.02777e-06	0.999998	4.28321e-09	1	FALSE	FALSE
	0.3	165	16	52.5469	-4.53166	209.067	1.01137e-05	0.99999	0.998868	0.00113174	FALSE	FALSE
	0.3	165	17	102.642	3.96653	136.081	8.77563e-05	0.999912	0.559315	0.440685	FALSE	FALSE
	0.3	165	18	131.431	-15.8014	140.431	3.80147e-05	0.999962	0.016268	0.983732	FALSE	FALSE
	0.3	165	19	191.07	0.982908	71.7327	2.94835e-06	0.999997	1.64748e-07	1	FALSE	FALSE
	0.3	165	20	128.868	1.45829	75.4168	1.74347e-05	0.999983	0.00111187	0.998888	FALSE	FALSE
	0.3	165	21	136.185	-5.87519	71.3857	8.28417e-06	0.999992	0.000384697	0.999615	FALSE	FALSE
	0.3	165	22	104.82	0.457253	68.899	0.000194534	0.999805	0.00958582	0.990414	FALSE	FALSE
	0.3	165	23	137.316	-14.256	94.7205	5.47077e-06	0.999995	0.00213231	0.997868	FALSE	FALSE
	0.3	165	24	170.749	6.13627	9.69611	5.71619e-06	0.999994	6.20445e-07	0.999999	FALSE	FALSE
	0.3	165	25	161.421	9.21758	53.0598	6.00088e-06	0.999994	2.62776e-05	0.999974	FALSE	FALSE
	0.3	165	26	154.194	-7.72166	77.0928	4.04268e-06	0.999996	5.12395e-05	0.999949	FALSE	FALSE
	0.3	165	27	113.986	4.10097	67.1748	4.09226e-05	0.999959	0.00536932	0.994631	FALSE	FALSE
	0.3	165	28	178.738	-5.38182	75.4736	5.57962e-06	0.999994	1.10076e-06	0.999999	FALSE	FALSE
	0.3	165	29	151.581	-1.82535	35.7386	7.69872e-06	0.999992	1.88112e-05	0.999981	FALSE	FALSE
	0.3	165	30	123.356	4.60266	86.8536	1.75243e-05	0.999982	0.00631542	0.993685	FALSE	FALSE
	0.3	165	31	93.6919	17.4737	20.8897	2.43928e-06	0.999998	0.117536	0.882464	FALSE	FALSE
	0.3	165	32	90.4636	-8.35931	166.964	1.53237e-05	0.999985	0.666394	0.333606	FALSE	FALSE
	0.3	165	33	60.0169	-7.97704	84.6867	0.00133164	0.998668	0.401056	0.598944	FALSE	FALSE
	0.3	165	34	81.9529	-3.24648	109.764	9.16887e-05	0.999908	0.19873	0.80127	FALSE	FALSE
	0.3	165	35	70.563	6.14458	97.434	0.000214034	0.999786	0.580215	0.419785	FALSE	FALSE
	0.3	165	36	62.5516	-17.4211	175.509	0.000244392	0.999756	0.952521	0.0474791	FALSE	FALSE
	0.3	165	37	125.426	-17.3145	126.752	1.12737e-05	0.999989	0.0295523	0.970448	FALSE	FALSE
	0.3	165	38	166.711	5.89985	13.8091	4.73724e-06	0.999995	1.26344e-06	0.999999	FALSE	FALSE
	0.3	165	39	142.357	3.2989	59.3788	1.223e-05	0.999988	0.000138167	0.999862	FALSE	FALSE
	0.3	165	40	102.99	-13.7552	120.312	7.59756e-05	0.999924	0.105348	0.894652	FALSE	FALSE
	0.3	165	41	74.0908	-21.0346	187.468	4.26228e-05	0.999957	0.968229	0.0317713	FALSE	FALSE
	0.3	165	42	142.995	1.20123	85.7222	6.43609e-06	0.999994	0.000338019	0.999662	FALSE	FALSE
	0.3	165	43	144.387	-7.57656	54.2072	2.1164e-05	0.999979	0.000134277	0.999866	FALSE	FALSE
	0.3	165	44	190.287	-4.48226	62.9753	2.7543e-06	0.999997	1.09446e-07	1	FALSE	FALSE
	0.3	165	45	181.322	-6.35981	80.2312	2.83337e-05	0.999972	9.08223e-07	0.999999	FALSE	FALSE
	0.3	165	46	214.007	-8.21681	72.1744	1.06259e-06	0.999999	3.03264e-09	1	FALSE	FALSE
	0.5	166	1	205.039	-7.18821	80.7282	8.11748e-07	0.999999	1.8495e-08	1	FALSE	FALSE
	0.5	166	2	203.951	-5.75457	80.8961	1.53053e-06	0.999998	2.09741e-08	1	FALSE	FALSE
	0.5	166	3	80.2927	-13.4797	237.448	3.74389e-05	0.999963	0.997946	0.0020544	FALSE	FALSE
	0.5	166	4	247.626	-12.8015	82.4137	3.06371e-07	1	1.02284e-11	1	FALSE	FALSE
	0.5	166	5	49.0811	-21.0487	172.578	0.002209	0.997791	0.985884	0.0141164	FALSE	FALSE
	0.5	166	6	30.9314	-10.4467	167.481	0.00457162	0.995428	0.967521	0.0324788	FALSE	FALSE
	0.5	166	7	106.323	-27.7707	176.484	1.72584e-05	0.999983	0.937203	0.062797	FALSE	FALSE
	0.5	166	8	86.2646	-30.3058	200.507	9.39722e-05	0.999906	0.996918	0.0030819	FALSE	FALSE
	0.5	166	9	45.0511	-30.9115	270.851	0.000572705	0.999427	0.999975	2.5129e-05	FALSE	FALSE
	0.5	166	10	78.3905	-8.84189	98.546	0.000360004	0.99964	0.211357	0.788643	FALSE	FALSE
	0.5	166	11	22.4732	-22.5091	221.169	0.900274	0.0997262	0.999021	0.000979354	TRUE	FALSE
	0.5	166	12	93.7731	-2.29132	148.811	1.21023e-05	0.999988	0.537667	0.462333	FALSE	FALSE
	0.5	166	13	12.7661	-16.6568	215.198	0.763089	0.236911	0.99791	0.00208998	TRUE	FALSE
	0.5	166	14	54.149	-26.9308	209.963	0.00305859	0.996941	0.998712	0.00128804	FALSE	FALSE
	0.5	166	15	20.8361	-11.1827	256.888	0.00628714	0.993713	0.999957	4.26655e-05	FALSE	FALSE
	0.5	166	16	32.2316	-5.13627	67.8832	0.0356284	0.964372	0.620644	0.379356	FALSE	FALSE
	0.5	166	17	33.5583	-13.9798	114.333	0.0190508	0.980949	0.908045	0.0919549	FALSE	FALSE
	0.5	166	18	35.9197	-31.0698	268.906	0.00701191	0.992988	0.999978	2.18012e-05	FALSE	FALSE
	0.5	166	19	51.8783	-26.1225	223.347	0.00239058	0.997609	0.999085	0.000914668	FALSE	FALSE
	0.5	166	20	17.7402	-17.6186	226.858	0.950975	0.0490254	0.998942	0.00105769	TRUE	FALSE
	0.5	167	1	89.4006	-0.753254	45.8939	8.75866e-05	0.999912	0.483265	0.516735	FALSE	FALSE
	0.5	167	2	109.895	-28.8177	214.942	1.56787e-06	0.999998	0.977846	0.0221545	FALSE	FALSE
	0.5	167	3	273.904	-9.0462	125.001	4.35159e-08	1	1.99135e-13	1	FALSE	FALSE
	0.5	167	4	179.034	15.9089	127.127	9.35859e-08	1	0.0614324	0.938568	FALSE	FALSE
	0.5	167	5	231.911	-6.01408	57.8461	5.02592e-07	0.999999	4.87297e-11	1	FALSE	FALSE
	0.5	167	6	40.7308	-27.8236	206.931	0.00200366	0.997996	0.999367	0.000632722	FALSE	FALSE
	0.5	167	7	116.619	-2.84761	147.515	3.29368e-06	0.999997	0.125	0.875	FALSE	FALSE
	0.5	167	8	27.3153	-39.0647	321.321	0.0127515	0.987248	1	1.18258e-07	FALSE	FALSE
[truncated: 4,581 more rows]
