# Supplementary material for: Accept–reject decision-making revealed via a quantitative and ethological study of C. elegans foraging
Source: eLife. 2025 Sep 10;13:RP103191. doi: 10.7554/eLife.103191 (PMC12422737; doi:10.7554/eLife.103191)
Supplement: Figure 2—source data 9. [file elife-103191-fig2-data9.xlsx]

## Sheet: Sheet1
Figure 2 - Source Data 9
Figure 2K - Velocity during search, sample, and exploit behaviors
Summary Statistics
	Row	weighted mean	weighted std	* mean and std of velocity (μm/s) across all time points weighted by probabilities of classification as:
	search (off)	207.243	0.030517	search (off): 1 - p(on patch)
	search (on)	200.127	0.0286327	search (on): p(on patch)*p(explore)*p(no response)
	sample (on)	114.407	0.0285945	sample (on): p(on patch)*p(explore)*p(sense)
	exploit (on)	57.0075	0.0156652	exploit (on): p(on patch)*p(exploit)*p(sense)
Kernel Density Estimate
	velocity (μm/s)	search (off)	search (on)	sample (on)	exploit (on)		* weighted kernel density estimates (KDE) of distributions of velocity (μm/s)
	0	3.86581e-05	1.09123e-05	0.000368903	0.00259948
	1	4.15765e-05	1.19814e-05	0.000404091	0.002796
	2	4.46483e-05	1.3136e-05	0.000441871	0.00300179
	3	4.78765e-05	1.4381e-05	0.000482354	0.00321678
	4	5.12631e-05	1.57208e-05	0.00052565	0.00344084
	5	5.48104e-05	1.71616e-05	0.000571865	0.00367378
	6	5.85203e-05	1.87083e-05	0.0006211	0.00391537
	7	6.23939e-05	2.03663e-05	0.00067345	0.0041653
	8	6.64325e-05	2.21408e-05	0.000729004	0.00442324
	9	7.06367e-05	2.40378e-05	0.000787843	0.00468876
	10	7.5007e-05	2.60627e-05	0.000850044	0.0049614
	11	7.95432e-05	2.82208e-05	0.000915669	0.00524064
	12	8.42453e-05	3.05188e-05	0.000984778	0.0055259
	13	8.91128e-05	3.29617e-05	0.00105741	0.00581656
	14	9.41446e-05	3.55549e-05	0.00113361	0.00611191
	15	9.93398e-05	3.83043e-05	0.00121339	0.00641125
	16	0.000104697	4.12166e-05	0.00129677	0.00671378
	17	0.000110214	4.42972e-05	0.00138374	0.0070187
	18	0.000115889	4.75522e-05	0.00147428	0.00732514
	19	0.000121721	5.09868e-05	0.00156837	0.00763222
	20	0.000127708	5.46084e-05	0.00166595	0.00793902
	21	0.000133846	5.84211e-05	0.00176698	0.0082446
	22	0.000140134	6.24313e-05	0.00187136	0.00854802
	23	0.000146571	6.66442e-05	0.00197902	0.0088483
	24	0.000153152	7.10663e-05	0.00208985	0.00914446
	25	0.000159876	7.57043e-05	0.00220372	0.00943555
	26	0.000166741	8.05615e-05	0.00232051	0.0097206
	27	0.000173745	8.56459e-05	0.00244006	0.00999866
	28	0.000180886	9.09624e-05	0.00256221	0.0102688
	29	0.000188162	9.65171e-05	0.00268679	0.0105301
	30	0.000195572	0.000102315	0.00281361	0.0107817
	31	0.000203114	0.000108362	0.00294246	0.0110227
	32	0.000210788	0.000114664	0.00307313	0.0112524
	33	0.000218593	0.000121227	0.0032054	0.01147
	34	0.000226528	0.000128056	0.00333904	0.0116748
	35	0.000234594	0.00013516	0.00347381	0.0118661
	36	0.000242792	0.000142542	0.00360947	0.0120434
	37	0.000251123	0.000150209	0.00374575	0.0122062
	38	0.000259586	0.000158166	0.0038824	0.0123539
	39	0.000268186	0.000166424	0.00401917	0.0124862
	40	0.000276925	0.000174986	0.00415578	0.0126028
	41	0.000285804	0.00018386	0.00429197	0.0127033
	42	0.000294829	0.000193054	0.00442749	0.0127876
	43	0.000304001	0.000202575	0.00456206	0.0128556
	44	0.000313328	0.000212431	0.00469543	0.0129072
	45	0.000322812	0.00022263	0.00482735	0.0129425
	46	0.000332461	0.000233179	0.00495756	0.0129615
	47	0.00034228	0.000244086	0.00508582	0.0129643
	48	0.000352277	0.000255362	0.0052119	0.0129512
	49	0.000362457	0.000267013	0.00533556	0.0129225
	50	0.00037283	0.000279052	0.0054566	0.0128784
	51	0.000383405	0.000291487	0.0055748	0.0128194
	52	0.000394188	0.000304329	0.00568998	0.0127459
	53	0.000405191	0.00031759	0.00580194	0.0126583
	54	0.000416422	0.000331279	0.00591051	0.0125572
	55	0.000427894	0.000345409	0.00601555	0.0124431
	56	0.000439615	0.000359994	0.0061169	0.0123166
	57	0.000451598	0.000375042	0.00621444	0.0121783
	58	0.000463854	0.000390567	0.00630804	0.012029
	59	0.000476395	0.000406584	0.00639761	0.0118692
	60	0.000489234	0.000423105	0.00648307	0.0116996
	61	0.000502384	0.000440144	0.00656433	0.0115209
	62	0.000515858	0.000457713	0.00664134	0.0113339
	63	0.000529669	0.000475829	0.00671406	0.0111393
	64	0.000543831	0.000494507	0.00678245	0.0109376
	65	0.000558358	0.000513761	0.0068465	0.0107298
	66	0.000573264	0.00053361	0.00690621	0.0105164
	67	0.000588563	0.000554066	0.00696158	0.0102983
	68	0.00060427	0.000575145	0.00701264	0.0100759
	69	0.000620399	0.000596865	0.00705941	0.00985009
	70	0.000636966	0.00061924	0.00710193	0.00962144
	71	0.000653986	0.000642293	0.00714027	0.0093906
	72	0.000671473	0.000666036	0.00717448	0.00915817
	73	0.000689442	0.000690486	0.00720463	0.00892474
	74	0.000707908	0.00071566	0.0072308	0.00869087
	75	0.000726887	0.000741578	0.00725307	0.00845709
	76	0.000746392	0.000768253	0.00727154	0.00822392
	77	0.00076644	0.000795707	0.0072863	0.00799184
	78	0.000787045	0.000823955	0.00729746	0.00776128
	79	0.000808222	0.000853013	0.00730511	0.00753269
	80	0.000829986	0.000882897	0.00730938	0.00730644
	81	0.000852351	0.000913626	0.00731036	0.0070829
	82	0.000875333	0.000945219	0.00730817	0.00686239
	83	0.000898945	0.000977688	0.00730294	0.00664524
	84	0.000923202	0.00101105	0.00729476	0.00643169
	85	0.000948118	0.00104532	0.00728377	0.00622202
	86	0.000973706	0.00108052	0.00727006	0.00601642
	87	0.00099998	0.00111666	0.00725377	0.0058151
	88	0.00102695	0.00115374	0.007235	0.00561821
	89	0.00105464	0.0011918	0.00721387	0.0054259
	90	0.00108306	0.00123082	0.00719048	0.00523829
	91	0.00111221	0.00127083	0.00716493	0.00505546
	92	0.00114211	0.00131185	0.00713735	0.0048775
	93	0.00117278	0.00135386	0.00710782	0.00470444
	94	0.00120422	0.0013969	0.00707645	0.00453634
	95	0.00123645	0.00144095	0.00704334	0.00437319
	96	0.00126947	0.00148603	0.00700857	0.00421501
	97	0.00130329	0.00153214	0.00697223	0.00406177
	98	0.00133794	0.00157928	0.00693442	0.00391344
	99	0.0013734	0.00162745	0.00689521	0.00376998
	100	0.0014097	0.00167666	0.00685469	0.00363134
	101	0.00144684	0.00172689	0.00681292	0.00349744
	102	0.00148483	0.00177815	0.00676998	0.00336822
	103	0.00152367	0.00183043	0.00672594	0.00324359
	104	0.00156337	0.00188372	0.00668087	0.00312346
	105	0.00160393	0.001938	0.00663482	0.00300773
	106	0.00164537	0.00199328	0.00658786	0.00289631
	107	0.00168767	0.00204953	0.00654004	0.00278907
	108	0.00173084	0.00210674	0.00649142	0.00268593
	109	0.00177488	0.00216489	0.00644204	0.00258675
	110	0.00181979	0.00222395	0.00639196	0.00249143
	111	0.00186558	0.00228392	0.00634121	0.00239984
	112	0.00191223	0.00234476	0.00628985	0.00231187
	113	0.00195974	0.00240644	0.00623791	0.0022274
	114	0.00200812	0.00246895	0.00618543	0.00214631
	115	0.00205734	0.00253225	0.00613245	0.00206849
	116	0.00210741	0.00259631	0.006079	0.00199381
	117	0.00215831	0.0026611	0.00602511	0.00192215
	118	0.00221004	0.00272658	0.00597083	0.00185342
	119	0.00226257	0.00279273	0.00591618	0.00178748
	120	0.00231591	0.00285949	0.00586119	0.00172423
	121	0.00237003	0.00292684	0.00580589	0.00166357
	122	0.00242492	0.00299473	0.0057503	0.00160538
	123	0.00248056	0.00306314	0.00569446	0.00154958
	124	0.00253694	0.003132	0.00563839	0.00149604
	125	0.00259402	0.00320129	0.00558212	0.00144469
	126	0.00265179	0.00327095	0.00552567	0.00139543
	127	0.00271023	0.00334096	0.00546906	0.00134816
	128	0.00276931	0.00341125	0.00541233	0.0013028
	129	0.00282901	0.00348181	0.00535549	0.00125926
	130	0.0028893	0.00355256	0.00529856	0.00121747
	131	0.00295014	0.00362349	0.00524159	0.00117735
	132	0.00301151	0.00369453	0.00518458	0.00113882
	133	0.00307338	0.00376565	0.00512755	0.00110181
	134	0.00313572	0.0038368	0.00507055	0.00106625
	135	0.00319848	0.00390794	0.00501358	0.00103207
	136	0.00326165	0.00397903	0.00495667	0.000999217
	137	0.00332517	0.00405002	0.00489984	0.000967627
	138	0.00338901	0.00412087	0.00484311	0.000937242
	139	0.00345314	0.00419154	0.00478651	0.000908009
	140	0.00351751	0.00426198	0.00473006	0.000879874
	141	0.00358208	0.00433216	0.00467378	0.000852789
	142	0.00364682	0.00440203	0.0046177	0.000826705
	143	0.00371167	0.00447155	0.00456182	0.000801576
	144	0.0037766	0.00454068	0.00450618	0.000777363
	145	0.00384156	0.00460937	0.00445079	0.000754023
	146	0.0039065	0.00467759	0.00439567	0.000731517
	147	0.00397139	0.0047453	0.00434084	0.00070981
	148	0.00403617	0.00481245	0.00428631	0.000688867
	149	0.00410079	0.00487901	0.00423212	0.000668652
	150	0.00416521	0.00494493	0.00417826	0.000649137
	151	0.00422939	0.00501017	0.00412475	0.000630291
	152	0.00429327	0.0050747	0.00407162	0.000612085
	153	0.0043568	0.00513847	0.00401887	0.000594493
	154	0.00441993	0.00520143	0.00396651	0.00057749
	155	0.00448262	0.00526356	0.00391456	0.000561051
	156	0.00454481	0.0053248	0.00386302	0.000545153
	157	0.00460646	0.00538512	0.00381191	0.000529775
	158	0.00466751	0.00544447	0.00376123	0.000514896
	159	0.00472792	0.00550281	0.003711	0.000500496
	160	0.00478764	0.00556011	0.00366121	0.000486558
	161	0.00484662	0.00561631	0.00361187	0.000473062
	162	0.00490481	0.00567138	0.003563	0.000459992
	163	0.00496215	0.00572527	0.00351458	0.000447334
	164	0.00501861	0.00577795	0.00346663	0.00043507
	165	0.00507414	0.00582938	0.00341915	0.000423188
	166	0.0051287	0.0058795	0.00337214	0.000411673
	167	0.00518222	0.00592829	0.0033256	0.000400512
	168	0.00523468	0.0059757	0.00327952	0.000389692
	169	0.00528603	0.00602169	0.00323392	0.000379203
	170	0.00533623	0.00606622	0.00318879	0.000369031
	171	0.00538524	0.00610926	0.00314413	0.000359167
	172	0.00543301	0.00615077	0.00309993	0.000349599
	173	0.00547952	0.00619071	0.0030562	0.000340319
	174	0.00552472	0.00622906	0.00301293	0.000331316
	175	0.00556859	0.00626576	0.00297012	0.000322581
	176	0.00561108	0.0063008	0.00292777	0.000314106
	177	0.00565218	0.00633414	0.00288588	0.000305882
	178	0.00569185	0.00636575	0.00284444	0.000297901
	179	0.00573005	0.00639561	0.00280345	0.000290155
	180	0.00576679	0.00642368	0.00276291	0.000282637
	181	0.00580201	0.00644994	0.00272282	0.000275339
	182	0.00583572	0.00647438	0.00268316	0.000268254
	183	0.00586788	0.00649697	0.00264394	0.000261376
	184	0.00589849	0.00651769	0.00260516	0.000254698
	185	0.00592753	0.00653652	0.00256681	0.000248214
	186	0.00595499	0.00655345	0.00252889	0.000241917
	187	0.00598085	0.00656847	0.0024914	0.000235801
	188	0.00600512	0.00658156	0.00245432	0.000229861
	189	0.00602779	0.00659272	0.00241767	0.000224092
	190	0.00604885	0.00660194	0.00238143	0.000218486
	191	0.0060683	0.00660921	0.00234561	0.00021304
	192	0.00608614	0.00661453	0.0023102	0.000207747
	193	0.00610238	0.00661791	0.00227519	0.000202605
	194	0.00611702	0.00661933	0.00224059	0.000197605
	195	0.00613007	0.00661881	0.00220639	0.000192745
	196	0.00614153	0.00661636	0.00217258	0.000188019
	197	0.00615141	0.00661196	0.00213917	0.000183423
	198	0.00615973	0.00660565	0.00210614	0.000178952
	199	0.00616649	0.00659742	0.0020735	0.000174603
	200	0.00617171	0.00658728	0.00204125	0.00017037
	201	0.00617541	0.00657526	0.00200937	0.00016625
	202	0.00617759	0.00656137	0.00197786	0.000162239
	203	0.00617828	0.00654562	0.00194673	0.000158333
	204	0.0061775	0.00652803	0.00191596	0.000154528
	205	0.00617525	0.00650862	0.00188555	0.00015082
	206	0.00617156	0.00648743	0.00185551	0.000147206
	207	0.00616645	0.00646446	0.00182581	0.000143683
	208	0.00615994	0.00643974	0.00179647	0.000140246
	209	0.00615205	0.0064133	0.00176747	0.000136894
	210	0.0061428	0.00638516	0.00173882	0.000133623
	211	0.0061322	0.00635536	0.0017105	0.000130429
	212	0.00612028	0.00632392	0.00168252	0.000127311
	213	0.00610707	0.00629087	0.00165487	0.000124265
	214	0.00609257	0.00625625	0.00162755	0.000121289
	215	0.00607682	0.00622007	0.00160055	0.000118381
	216	0.00605983	0.00618239	0.00157387	0.000115538
	217	0.00604163	0.00614323	0.00154751	0.000112758
	218	0.00602223	0.00610264	0.00152146	0.000110038
	219	0.00600165	0.00606064	0.00149572	0.000107378
	220	0.00597993	0.00601727	0.00147029	0.000104774
	221	0.00595706	0.00597257	0.00144516	0.000102226
	222	0.00593309	0.00592658	0.00142033	9.97321e-05
	223	0.00590802	0.00587935	0.0013958	9.72902e-05
	224	0.00588187	0.00583091	0.00137157	9.48987e-05
	225	0.00585467	0.0057813	0.00134763	9.25569e-05
	226	0.00582644	0.00573056	0.00132397	9.02632e-05
	227	0.00579719	0.00567875	0.0013006	8.80168e-05
	228	0.00576695	0.00562591	0.00127752	8.58163e-05
	229	0.00573572	0.00557208	0.00125472	8.3661e-05
	230	0.00570354	0.00551731	0.00123219	8.15495e-05
	231	0.00567042	0.00546163	0.00120994	7.94813e-05
	232	0.00563638	0.00540512	0.00118796	7.74557e-05
	233	0.00560144	0.0053478	0.00116625	7.54717e-05
	234	0.00556561	0.00528974	0.00114481	7.35288e-05
	235	0.00552892	0.00523097	0.00112363	7.16261e-05
	236	0.00549138	0.00517156	0.00110271	6.97629e-05
	237	0.00545302	0.00511154	0.00108206	6.7939e-05
	238	0.00541384	0.00505098	0.00106165	6.61537e-05
	239	0.00537388	0.00498992	0.0010415	6.44064e-05
	240	0.00533314	0.00492842	0.0010216	6.26967e-05
	241	0.00529166	0.00486651	0.00100195	6.10239e-05
	242	0.00524943	0.00480426	0.000982541	5.93878e-05
	243	0.0052065	0.00474172	0.000963375	5.77877e-05
	244	0.00516287	0.00467893	0.00094445	5.62231e-05
	245	0.00511856	0.00461595	0.000925763	5.46937e-05
	246	0.0050736	0.00455282	0.000907311	5.31989e-05
	247	0.005028	0.00448959	0.000889092	5.17383e-05
	248	0.00498178	0.00442632	0.000871105	5.03113e-05
	249	0.00493497	0.00436304	0.000853347	4.89177e-05
	250	0.00488758	0.0042998	0.000835817	4.75573e-05
	251	0.00483963	0.00423665	0.000818512	4.6229e-05
	252	0.00479115	0.00417363	0.000801432	4.49327e-05
	253	0.00474215	0.00411078	0.000784576	4.36678e-05
	254	0.00469266	0.00404814	0.000767941	4.24339e-05
	255	0.0046427	0.00398575	0.000751527	4.12302e-05
	256	0.00459229	0.00392364	0.000735333	4.00567e-05
	257	0.00454145	0.00386185	0.000719359	3.89128e-05
	258	0.0044902	0.00380041	0.000703601	3.77978e-05
	259	0.00443857	0.00373936	0.000688061	3.67112e-05
	260	0.00438658	0.00367872	0.000672739	3.56528e-05
	261	0.00433425	0.00361851	0.000657636	3.4622e-05
	262	0.0042816	0.00355878	0.00064275	3.36182e-05
	263	0.00422865	0.00349953	0.000628079	3.2641e-05
	264	0.00417544	0.00344079	0.000613626	3.169e-05
	265	0.00412197	0.00338257	0.000599391	3.07644e-05
	266	0.00406828	0.00332491	0.000585372	2.98639e-05
	267	0.0040144	0.00326779	0.000571571	2.89881e-05
	268	0.00396033	0.00321126	0.000557987	2.81363e-05
	269	0.00390611	0.00315531	0.000544618	2.73081e-05
	270	0.00385176	0.00309996	0.00053147	2.65029e-05
	271	0.0037973	0.00304521	0.000518539	2.57204e-05
	272	0.00374276	0.00299107	0.000505824	2.49597e-05
	273	0.00368816	0.00293755	0.000493329	2.42206e-05
	274	0.00363352	0.00288464	0.00048105	2.35025e-05
	275	0.00357887	0.00283236	0.000468988	2.28047e-05
	276	0.00352423	0.00278069	0.000457141	2.2127e-05
	277	0.00346963	0.00272965	0.000445512	2.14688e-05
	278	0.00341508	0.00267923	0.000434098	2.08294e-05
	279	0.00336061	0.00262943	0.000422899	2.02085e-05
	280	0.00330624	0.00258024	0.000411912	1.96054e-05
	281	0.003252	0.00253167	0.00040114	1.90196e-05
	282	0.0031979	0.00248369	0.000390579	1.84508e-05
	283	0.00314397	0.00243632	0.000380229	1.78981e-05
	284	0.00309023	0.00238955	0.000370088	1.73614e-05
	285	0.0030367	0.00234337	0.000360155	1.684e-05
	286	0.0029834	0.00229777	0.00035043	1.63334e-05
	287	0.00293036	0.00225274	0.000340908	1.58411e-05
	288	0.00287758	0.00220828	0.000331589	1.53626e-05
	289	0.00282509	0.00216439	0.000322472	1.48975e-05
	290	0.00277291	0.00212105	0.000313554	1.44454e-05
	291	0.00272106	0.00207825	0.000304833	1.40057e-05
	292	0.00266955	0.002036	0.000296306	1.35782e-05
	293	0.0026184	0.00199428	0.000287971	1.31621e-05
	294	0.00256763	0.00195308	0.000279827	1.27571e-05
	295	0.00251725	0.00191241	0.000271871	1.2363e-05
	296	0.00246727	0.00187225	0.000264099	1.19792e-05
	297	0.00241772	0.00183261	0.000256512	1.16054e-05
	298	0.00236861	0.00179346	0.000249104	1.12412e-05
	299	0.00231994	0.00175481	0.000241874	1.08865e-05
	300	0.00227174	0.00171666	0.000234821	1.05409e-05
	301	0.00222401	0.00167899	0.000227939	1.02039e-05
	302	0.00217677	0.00164182	0.000221228	9.87519e-06
	303	0.00213002	0.00160512	0.000214685	9.55482e-06
	304	0.00208377	0.00156891	0.000208306	9.24233e-06
	305	0.00203805	0.00153318	0.000202089	8.93756e-06
	306	0.00199284	0.00149791	0.000196032	8.64029e-06
	307	0.00194817	0.00146312	0.000190132	8.35035e-06
	308	0.00190404	0.00142881	0.000184386	8.06743e-06
	309	0.00186045	0.00139497	0.000178793	7.7915e-06
	310	0.00181742	0.00136159	0.000173348	7.52231e-06
	311	0.00177495	0.00132869	0.000168049	7.25982e-06
	312	0.00173304	0.00129626	0.000162895	7.00377e-06
	313	0.00169171	0.0012643	0.000157882	6.75424e-06
	314	0.00165095	0.00123282	0.000153007	6.51101e-06
	315	0.00161077	0.00120181	0.000148267	6.27407e-06
	316	0.00157117	0.00117127	0.000143661	6.0432e-06
	317	0.00153216	0.00114121	0.000139186	5.81843e-06
	318	0.00149374	0.00111163	0.000134838	5.59963e-06
	319	0.00145591	0.00108253	0.000130615	5.38674e-06
	320	0.00141867	0.00105391	0.000126513	5.17968e-06
	321	0.00138204	0.00102578	0.000122532	4.97848e-06
	322	0.001346	0.000998122	0.000118668	4.78299e-06
	323	0.00131056	0.000970956	0.000114917	4.59316e-06
	324	0.00127573	0.000944276	0.000111277	4.40902e-06
	325	0.0012415	0.000918086	0.000107744	4.23038e-06
	326	0.00120787	0.000892386	0.000104318	4.05725e-06
	327	0.00117485	0.000867176	0.000100994	3.8896e-06
	328	0.00114244	0.000842459	9.77693e-05	3.7274e-06
	329	0.00111063	0.000818234	9.46414e-05	3.57046e-06
	330	0.00107942	0.000794502	9.16071e-05	3.41879e-06
	331	0.00104882	0.000771263	8.86634e-05	3.27231e-06
	332	0.00101883	0.000748515	8.58083e-05	3.13095e-06
	333	0.000989433	0.00072626	8.30392e-05	2.99465e-06
	334	0.000960642	0.000704494	8.03522e-05	2.86328e-06
	335	0.000932451	0.000683215	7.77453e-05	2.73685e-06
	336	0.00090486	0.000662423	7.52152e-05	2.61522e-06
	337	0.000877864	0.000642114	7.27597e-05	2.49824e-06
	338	0.000851462	0.000622286	7.03759e-05	2.3859e-06
	339	0.000825652	0.000602934	6.80621e-05	2.27803e-06
	340	0.00080043	0.000584056	6.58153e-05	2.1746e-06
	341	0.000775793	0.000565648	6.36327e-05	2.07544e-06
	342	0.000751736	0.000547702	6.15127e-05	1.98052e-06
	343	0.000728255	0.000530214	5.94532e-05	1.88962e-06
	344	0.000705346	0.000513181	5.74516e-05	1.80268e-06
	345	0.000683003	0.000496594	5.55058e-05	1.71959e-06
	346	0.000661222	0.000480446	5.36145e-05	1.64019e-06
	347	0.000639996	0.000464732	5.17754e-05	1.56437e-06
	348	0.000619321	0.000449444	4.99871e-05	1.49206e-06
	349	0.000599188	0.000434574	4.82477e-05	1.42313e-06
	350	0.000579592	0.000420116	4.65558e-05	1.35743e-06
	351	0.000560525	0.00040606	4.49105e-05	1.29484e-06
	352	0.000541979	0.0003924	4.331e-05	1.23522e-06
	353	0.000523947	0.000379126	4.17531e-05	1.17848e-06
	354	0.000506421	0.00036623	4.02391e-05	1.12452e-06
	355	0.000489392	0.000353704	3.8767e-05	1.07319e-06
	356	0.000472853	0.000341539	3.73355e-05	1.02439e-06
	357	0.000456794	0.000329725	3.59435e-05	9.77976e-07
	358	0.000441206	0.000318256	3.45903e-05	9.33869e-07
	359	0.000426079	0.000307121	3.3275e-05	8.91923e-07
	360	0.000411405	0.000296314	3.1997e-05	8.52017e-07
	361	0.000397174	0.000285824	3.0756e-05	8.14123e-07
	362	0.000383376	0.000275645	2.95518e-05	7.78126e-07
	363	0.000370001	0.000265767	2.83833e-05	7.43907e-07
	364	0.000357041	0.000256182	2.72501e-05	7.11366e-07
	365	0.000344484	0.000246885	2.61508e-05	6.80426e-07
	366	0.000332322	0.000237865	2.50859e-05	6.51021e-07
	367	0.000320543	0.000229116	2.40547e-05	6.23058e-07
	368	0.00030914	0.000220632	2.30562e-05	5.96473e-07
	369	0.0002981	0.000212403	2.20904e-05	5.71189e-07
	370	0.000287416	0.000204425	2.1156e-05	5.47073e-07
	371	0.000277078	0.000196691	2.02537e-05	5.24149e-07
	372	0.000267075	0.000189194	1.93827e-05	5.02363e-07
	373	0.000257399	0.000181928	1.8542e-05	4.81571e-07
	374	0.00024804	0.000174889	1.77312e-05	4.61779e-07
	375	0.00023899	0.000168071	1.69499e-05	4.42937e-07
	376	0.000230239	0.000161467	1.61968e-05	4.24988e-07
	377	0.000221779	0.000155071	1.54727e-05	4.0789e-07
	378	0.000213601	0.00014888	1.4776e-05	3.91603e-07
	379	0.000205696	0.00014289	1.41067e-05	3.76087e-07
	380	0.000198057	0.000137095	1.34639e-05	3.61316e-07
	381	0.000190675	0.000131491	1.28466e-05	3.47256e-07
	382	0.000183543	0.000126073	1.22547e-05	3.33869e-07
	383	0.000176653	0.000120836	1.16872e-05	3.2108e-07
	384	0.000169998	0.000115778	1.11446e-05	3.08933e-07
	385	0.00016357	0.000110894	1.06248e-05	2.97372e-07
	386	0.000157363	0.000106179	1.01274e-05	2.86368e-07
	387	0.000151369	0.000101629	9.65282e-06	2.75885e-07
	388	0.000145582	9.72419e-05	9.1992e-06	2.65899e-07
	389	0.000139996	9.30114e-05	8.7666e-06	2.56426e-07
	390	0.000134604	8.89363e-05	8.35424e-06	2.47403e-07
	391	0.000129401	8.5012e-05	7.96119e-06	2.38827e-07
	392	0.00012438	8.12348e-05	7.58671e-06	2.30673e-07
	393	0.000119535	7.75999e-05	7.23068e-06	2.22909e-07
	394	0.000114862	7.41045e-05	6.89228e-06	2.15517e-07
	395	0.000110354	7.07457e-05	6.57104e-06	2.08491e-07
	396	0.000106007	6.75178e-05	6.26634e-06	2.01808e-07
	397	0.000101815	6.44191e-05	5.97736e-06	1.9543e-07
	398	9.77734e-05	6.14451e-05	5.70372e-06	1.89338e-07
	399	9.38779e-05	5.85926e-05	5.44479e-06	1.83515e-07
	400	9.01228e-05	5.58579e-05	5.19985e-06	1.77949e-07
	401	8.65045e-05	5.3238e-05	4.96837e-06	1.72621e-07
	402	8.30181e-05	5.0728e-05	4.74999e-06	1.67528e-07
	403	7.96598e-05	4.83256e-05	4.5439e-06	1.62643e-07
	404	7.64249e-05	4.60265e-05	4.34986e-06	1.57939e-07
	405	7.33095e-05	4.38277e-05	4.16726e-06	1.53396e-07
	406	7.03094e-05	4.17259e-05	3.99561e-06	1.49013e-07
	407	6.74211e-05	3.97171e-05	3.8343e-06	1.44768e-07
	408	6.46412e-05	3.77984e-05	3.68279e-06	1.40646e-07
	409	6.19657e-05	3.59664e-05	3.54073e-06	1.36654e-07
	410	5.9391e-05	3.42175e-05	3.4076e-06	1.32753e-07
	411	5.69135e-05	3.25484e-05	3.28291e-06	1.28925e-07
	412	5.45303e-05	3.0956e-05	3.16617e-06	1.25192e-07
	413	5.22379e-05	2.94388e-05	3.05684e-06	1.21535e-07
	414	5.00332e-05	2.79918e-05	2.95463e-06	1.1794e-07
	415	4.79131e-05	2.6613e-05	2.8589e-06	1.14401e-07
	416	4.58754e-05	2.52999e-05	2.76955e-06	1.10911e-07
	417	4.39162e-05	2.4048e-05	2.68604e-06	1.07463e-07
	418	4.20333e-05	2.28566e-05	2.60771e-06	1.04063e-07
	419	4.02241e-05	2.1722e-05	2.53425e-06	1.00698e-07
	420	3.84852e-05	2.06418e-05	2.46533e-06	9.73673e-08
	421	3.68147e-05	1.96134e-05	2.40081e-06	9.40709e-08
	422	3.52102e-05	1.86347e-05	2.34019e-06	9.07881e-08
	423	3.36691e-05	1.77032e-05	2.28302e-06	8.75478e-08
	424	3.21894e-05	1.68168e-05	2.22912e-06	8.43462e-08
	425	3.07685e-05	1.59739e-05	2.17816e-06	8.11748e-08
	426	2.94045e-05	1.51718e-05	2.12976e-06	7.80332e-08
	427	2.80955e-05	1.44089e-05	2.08366e-06	7.49234e-08
	428	2.68392e-05	1.36827e-05	2.03943e-06	7.18584e-08
	429	2.56337e-05	1.29923e-05	1.99714e-06	6.88266e-08
	430	2.44771e-05	1.23353e-05	1.95629e-06	6.58432e-08
	431	2.33679e-05	1.17104e-05	1.91679e-06	6.29039e-08
	432	2.23042e-05	1.11156e-05	1.87833e-06	6.00118e-08
	433	2.12842e-05	1.05505e-05	1.84084e-06	5.71809e-08
	434	2.03065e-05	1.00126e-05	1.80416e-06	5.44107e-08
	435	1.93693e-05	9.50073e-06	1.76806e-06	5.16973e-08
	436	1.84712e-05	9.01448e-06	1.73239e-06	4.90482e-08
	437	1.76108e-05	8.55168e-06	1.69697e-06	4.64632e-08
	438	1.67869e-05	8.11222e-06	1.66196e-06	4.39484e-08
	439	1.59977e-05	7.69398e-06	1.62708e-06	4.15151e-08
	440	1.52422e-05	7.2964e-06	1.59228e-06	3.91541e-08
	441	1.4519e-05	6.91814e-06	1.55735e-06	3.68745e-08
	442	1.38268e-05	6.55847e-06	1.52235e-06	3.46686e-08
	443	1.31646e-05	6.21627e-06	1.48733e-06	3.25451e-08
	444	1.25313e-05	5.89119e-06	1.45208e-06	3.05069e-08
	445	1.19257e-05	5.5824e-06	1.41664e-06	2.85605e-08
	446	1.13467e-05	5.28876e-06	1.38111e-06	2.66929e-08
	447	1.07932e-05	5.00943e-06	1.34533e-06	2.49157e-08
	448	1.02642e-05	4.7439e-06	1.30943e-06	2.32256e-08
	449	9.75909e-06	4.49195e-06	1.27331e-06	2.16154e-08
	450	9.27666e-06	4.25237e-06	1.23699e-06	2.01026e-08
