# Supplementary material for: Accept–reject decision-making revealed via a quantitative and ethological study of C. elegans foraging
Source: eLife. 2025 Sep 10;13:RP103191. doi: 10.7554/eLife.103191 (PMC12422737; doi:10.7554/eLife.103191)
Supplement: Figure 2—source data 10. [file elife-103191-fig2-data10.xlsx]

## Sheet: Sheet1
Figure 2 - Source Data 10
Figure 2L - Encounter classification as explore or exploit and sense or no response
Summary Statistics
	label	OD600	growth time (hr)	# worms	# encounters
	0	0	1	30	743
	0.2	0.05	1	23	505
	0.3	0.1	1	25	686
	0.5	0.5	1	35	743
	1	1	1	46	876
	2	2	1	44	626
	3	3	1	48	655
	5	4	1	44	594
	6	5	1	50	598
	10	10	1	50	419
	50	1	12	20	69
	200	1	48	28	46
Source Data
	label	worm #	encounter #	encounter start (min)	encounter duration (min)	log10(duration)	mean velocity on patch (μm/s)	log10(velocity)	min. velocity on patch (μm/s)	Δ velocity (μm/s^2)	max. Δ velocity (μm/s^2)	p(exploit)	p(explore)	p(sense)	p(no response)		* posterior probability of classification as explore or exploit as estimated by the Gaussian Mixture Model described in methods and Figure 2 - supplement 6
	2	1	1	0	0.0833592	-1.07905	209.658	2.32151	181.114	-7.56184	35.3088	2.24858e-07	1	4.06486e-05	0.999959		* posterior probability of classification as sense or non-response as estimated by semi-supervised Quadratic Discriminant Analysis (QDA) described in methods, Figure 2I, Figure 2 - supplement 8, and Video 5
	2	1	2	0.655759	0.311208	-0.50695	175.543	2.24438	146.669	0.715483	41.3154	2.16147e-05	0.999978	3.68495e-05	0.999963		* RGB value calculation: p(exploit)*[0 114 178] + p(explore)*p(sense)*[0 158 115] + p(explore)*p(no response)*[230 159 0]
	2	1	3	2.67305	0.377895	-0.422629	157.574	2.19748	116.711	-12.0407	180.524	6.87314e-05	0.999931	0.311496	0.688504
	2	1	4	5.1127	0.261192	-0.58304	234.513	2.37017	181.838	-5.53162	60.2226	2.8324e-06	0.999997	4.40513e-07	1
	2	1	5	5.67398	0.18339	-0.736624	234.697	2.37051	207.623	-3.03123	50.0906	8.90611e-07	0.999999	3.3415e-09	1
	2	1	6	9.86417	0.272307	-0.564942	175.451	2.24416	158.123	-2.33039	36.2119	1.40321e-05	0.999986	7.79761e-06	0.999992
	2	1	7	17.7833	0.81692	-0.0878205	114.259	2.05789	30.45	-8.91788	179.889	0.00415996	0.99584	0.984693	0.0153074
	2	1	8	22.0235	0.316765	-0.499263	161.434	2.20799	99.729	-7.68303	84.6787	3.41164e-05	0.999966	0.0298547	0.970145
	2	1	9	23.0071	0.283421	-0.547568	200.339	2.30176	145.02	-13.2669	100.164	8.29837e-06	0.999992	0.000697245	0.999303
	2	1	10	29.7148	0.600186	-0.221714	158.285	2.19944	68.1656	-5.65189	106.634	0.000367562	0.999632	0.343492	0.656508
	2	1	11	32.5045	0.455697	-0.341324	155.443	2.19157	123.093	-9.51895	72.1553	0.000140799	0.999859	0.00314321	0.996857
	2	1	12	33.3826	0.739118	-0.131286	70.7439	1.84969	17.8268	-7.52181	196.848	0.0147129	0.985287	0.99651	0.00348963
	2	1	13	43.0856	16.9108	1.22816	47.0643	1.67269	13.2354	-7.86726	181.442	0.999987	1.33821e-05	0.989971	0.0100291
	2	2	1	0	0.238963	-0.621669	210.702	2.32367	78.4292	25.7591	36.9097	3.65703e-06	0.999996	0.676256	0.323744
	2	2	2	4.95709	0.144489	-0.840164	207.601	2.31723	162.138	-7.70536	95.8304	8.9285e-07	0.999999	2.9479e-05	0.999971
	2	2	3	5.39056	0.300093	-0.522744	203.947	2.30952	167.537	-6.10492	83.6518	9.23109e-06	0.999991	8.14158e-06	0.999992
	2	2	4	9.62521	0.439025	-0.357511	114.136	2.05742	58.5642	-25.3017	237.749	0.000458122	0.999542	0.999282	0.000717745
	2	2	5	11.1868	0.561285	-0.250816	86.6803	1.93792	42.175	-23.7644	185.016	0.00298312	0.997017	0.996085	0.00391525
	2	2	6	22.9516	37.0448	1.56873	40.7569	1.6102	7.58301	0		1	8.93794e-08	0.784536	0.215464
	2	3	1	0	1.17259	0.0691446	127.939	2.107	63.4601	-0.843808	105.733	0.0126655	0.987335	0.868639	0.131361
	2	3	2	4.19575	0.444582	-0.352048	160.06	2.20428	114.699	-6.45891	181.986	0.000113478	0.999887	0.555364	0.444636
	2	3	3	5.65731	0.389009	-0.41004	119.214	2.07633	68.4217	-16.3062	166.863	0.000258979	0.999741	0.900819	0.0991814
	2	3	4	39.0677	20.9287	1.32074	39.2286	1.5936	10.823	-8.03954	175.042	0.999996	3.86692e-06	0.985341	0.0146588
	2	4	1	0.505712	0.266749	-0.573897	155.089	2.19058	89.7515	12.1184	16.1045	2.40965e-05	0.999976	0.0310852	0.968915
	2	4	2	2.33961	0.416796	-0.380077	134.961	2.13021	79.7142	-5.16313	94.2181	0.0001898	0.99981	0.140663	0.859337
	2	4	3	4.67367	0.411239	-0.385906	186.859	2.27151	121.326	-6.48265	132.086	4.2949e-05	0.999957	0.0202071	0.979793
	2	4	4	6.50757	0.500155	-0.300895	112.47	2.05104	67.4898	-22.7929	227.71	0.000747337	0.999253	0.99734	0.00265972
	2	4	5	7.63014	0.689103	-0.161716	65.0581	1.8133	20.018	-15.5683	148.403	0.0155265	0.984474	0.968945	0.0310548
	2	4	6	10.281	0.24452	-0.611685	180.699	2.25696	158.121	-2.98575	49.2961	8.63683e-06	0.999991	1.03051e-05	0.99999
	2	4	7	10.6477	0.394567	-0.403879	198.79	2.2984	148.846	-16.9817	141.419	2.7774e-05	0.999972	0.00266018	0.99734
	2	4	8	11.7925	0.444582	-0.352048	134.198	2.12775	54.4339	-11.247	181.506	0.000241977	0.999758	0.966928	0.033072
	2	4	9	12.7095	2.57858	0.41138	84.6179	1.92746	30.55	-18.2436	150.043	0.589089	0.410911	0.977887	0.0221128
	2	4	10	24.0074	0.294536	-0.530862	159.316	2.20226	137.339	1.9609	10.7991	2.87604e-05	0.999971	7.5399e-05	0.999925
	2	4	11	24.5965	1.48379	0.171373	58.6553	1.76831	28.993	-17.6167	200.944	0.233457	0.766543	0.994999	0.00500095
	2	4	12	27.3863	13.4986	1.13029	43.0587	1.63406	14.5366	-17.1075	171.423	0.999947	5.26893e-05	0.987258	0.0127421
	2	4	13	42.1853	17.8111	1.25069	40.9778	1.61255	12.283	-13.518	132.808	0.99999	1.02007e-05	0.949926	0.050074
	6	5	1	9.79748	0.24452	-0.611685	222.775	2.34787	186.268	-3.46962	105.191	2.95427e-06	0.999997	1.40209e-06	0.999999
	6	5	2	12.5039	0.350109	-0.455797	139.214	2.14368	110.137	-9.42754	125.641	9.34085e-05	0.999907	0.0420427	0.957957
	6	5	3	21.6011	38.3897	1.58421	40.8595	1.61129	3.58783	-3.91476	131.422	1	6.97155e-08	0.921627	0.0783727
	6	6	1	2.92313	0.205619	-0.686936	249.89	2.39775	228.691	-3.3062	79.4222	9.06988e-07	0.999999	2.07197e-10	1
	6	6	2	5.72955	0.238963	-0.621669	232.379	2.3662	157.206	-3.89107	114.441	2.19589e-06	0.999998	0.000148279	0.999852
	6	6	3	8.3248	0.177833	-0.749988	226.804	2.35565	193.217	-10.6239	119.874	9.80162e-07	0.999999	8.73586e-07	0.999999
	6	6	4	11.8426	0.650202	-0.186952	78.4034	1.89433	35.5995	-9.01872	141.163	0.00686985	0.99313	0.893996	0.106004
	6	6	5	14.5656	0.644644	-0.19068	83.5093	1.92174	39.4339	-15.7061	176.042	0.00535144	0.994649	0.977366	0.0226339
	6	6	6	16.6941	0.205619	-0.686936	181.117	2.25796	143.537	-10.3004	83.2405	5.06729e-06	0.999995	0.00035118	0.999649
	6	6	7	19.1448	0.216734	-0.664073	190.854	2.2807	131.931	-26.7881	181.505	4.50511e-06	0.999995	0.470094	0.529906
	6	6	8	30.4872	29.5036	1.46987	43.4566	1.63806	9.95656	-5.05689	143.037	1	3.90606e-07	0.94448	0.0555203
	6	7	1	2.33961	0.533499	-0.272867	133.287	2.12479	38.5295	-8.05299	145.318	0.000472202	0.999528	0.900477	0.0995233
	6	7	2	16.8719	38.4786	1.58522	48.3009	1.68396	7.24143	-6.45248	201.246	1	5.6335e-08	0.997991	0.00200856
	6	7	3	55.5172	4.47361	0.650658	53.1759	1.72571	14.7078	-23.9829	292.276	0.978136	0.0218641	0.999991	9.2032e-06
	6	8	1	1.21704	0.24452	-0.611685	159.727	2.20338	122.503	-9.10097	104.196	1.60516e-05	0.999984	0.00581503	0.994185
	6	8	2	4.44582	0.266749	-0.573897	165.744	2.21944	119.154	-0.279732	87.7133	1.74049e-05	0.999983	0.00457447	0.995426
	6	8	3	5.31276	0.611301	-0.213745	77.0744	1.88691	43.5384	-30.1646	218.701	0.00599247	0.994008	0.99977	0.000230331
	6	8	4	8.66935	0.144489	-0.840164	171.188	2.23347	101.29	18.1197	4.8592	2.65325e-06	0.999997	0.0371575	0.962842
	6	8	5	13.5598	16.3829	1.21439	47.7261	1.67876	8.10548	-25.259	242.289	0.999984	1.62191e-05	0.999785	0.000214952
	6	8	6	30.3594	29.6314	1.47175	59.6575	1.77566	0.613216	-6.97278	160.426	1	2.92904e-07	0.971938	0.0280622
	10	9	1	0.516815	0.316757	-0.499273	149.686	2.17518	112.973	7.80061	8.09456	4.86368e-05	0.999951	0.00143146	0.998569
	10	9	2	2.32289	0.288972	-0.539145	170.804	2.2325	150.203	-7.59935	65.3549	1.93497e-05	0.999981	6.96296e-05	0.99993
	10	9	3	3.27316	0.1167	-0.932929	233.147	2.36763	209.288	-8.01647	70.3073	2.57776e-07	1	6.69857e-09	1
	10	9	4	4.51796	0.288972	-0.539145	129.325	2.11168	65.6867	-19.8259	172.337	7.28341e-05	0.999927	0.958742	0.0412584
	10	9	5	9.43048	0.850244	-0.0704566	69.2944	1.8407	26.0698	-11.4345	164.945	0.0248665	0.975133	0.967398	0.0326017
	10	9	6	13.3316	1.58379	0.199697	44.3752	1.64714	19.8594	-7.07066	149.088	0.426891	0.573109	0.945708	0.0542916
	10	9	7	17.0882	42.9067	1.63253	39.4314	1.59584	10.799	-5.29426	175.566	1	3.37235e-08	0.990057	0.00994313
	10	10	1	4.38459	0.583501	-0.233959	108.63	2.03595	69.7674	-34.3415	232.722	0.0014498	0.99855	0.999901	9.90322e-05
	10	10	2	8.46909	0.783558	-0.105929	76.9363	1.88613	30.3917	-22.3254	234.771	0.0135739	0.986426	0.999424	0.00057552
	10	10	3	10.0696	0.0722429	-1.1412	179.871	2.25496	131.835	22.0751	92.2726	4.48303e-07	1	0.951694	0.0483056
	10	10	4	10.3808	49.6142	1.69561	47.2051	1.67399	8.33415	-32.0671	253.66	1	9.28781e-09	0.999976	2.36799e-05
	10	11	1	0	0.105586	-0.976394	216.536	2.33553	203.394	-1.28161	31.7042	3.13832e-07	1	9.23127e-07	0.999999
	10	11	2	5.67941	0.227843	-0.642364	191.718	2.28266	154.201	-3.11799	48.5473	5.1274e-06	0.999995	1.78698e-05	0.999982
	10	11	3	11.0143	0.516815	-0.286665	90.605	1.95715	48.9723	-9.20435	167.012	0.00194178	0.998058	0.945951	0.0540494
	10	11	4	12.8926	19.2722	1.28493	41.5574	1.61865	14.4108	-18.0041	222.508	0.999994	6.24851e-06	0.998665	0.00133453
	10	11	5	34.7377	14.582	1.16382	44.5694	1.64904	10.1994	-27.7459	255.442	0.999967	3.32731e-05	0.999929	7.10638e-05
	10	11	6	49.8087	10.1863	1.00801	43.7295	1.64077	13.0721	-14.7592	160.542	0.999737	0.000262729	0.976173	0.0238275
	10	12	1	1.52822	0.355658	-0.448968	126.009	2.1004	72.8774	-13.587	178.548	0.000153434	0.999847	0.90756	0.0924403
	10	12	2	2.23953	0.500143	-0.300905	107.164	2.03005	43.3255	-25.1526	200.401	0.000906364	0.999094	0.998124	0.001876
	10	12	3	3.55658	0.644629	-0.19069	76.7535	1.8851	41.449	-25.7075	209.25	0.00719679	0.992803	0.998833	0.00116729
	10	12	4	7.79112	0.411229	-0.385916	130.066	2.11417	112.257	-5.61087	68.3656	0.000212822	0.999787	0.00533616	0.994664
	10	12	5	17.216	35.6658	1.55225	43.1454	1.63493	10.1497	-18.5611	229.252	1	1.08631e-07	0.999123	0.000877476
	10	12	6	54.1822	5.81278	0.764384	43.4966	1.63846	15.471	-23.2435	326.106	0.995014	0.00498574	1	3.52971e-07
	0	13	1	2.77857	0.477915	-0.32065	248.197	2.3948	175.138	4.86803	44.7506	2.13716e-05	0.999979	9.29155e-07	0.999999
	0	13	2	3.3843	0.755772	-0.121609	202.452	2.30632	138.929	-14.699	159.666	0.000361133	0.999639	0.0139019	0.986098
	0	13	3	4.76803	0.394558	-0.40389	215.412	2.33327	157.123	5.74034	46.1815	1.91424e-05	0.999981	1.56515e-05	0.999984
	0	13	4	6.15176	0.455686	-0.341334	173.55	2.23942	98.6702	-13.4482	126.544	8.72728e-05	0.999913	0.160387	0.839613
	0	13	5	8.65248	0.483472	-0.315629	201.061	2.30333	91.8731	-2.72139	134.809	5.74119e-05	0.999943	0.32411	0.67589
	0	13	6	9.8306	0.566829	-0.246548	199.739	2.30046	113.15	2.19957	144.996	0.000111972	0.999888	0.383574	0.616426
	0	13	7	10.7809	0.394558	-0.40389	185.271	2.26781	114.355	-14.5589	160.402	3.83654e-05	0.999962	0.155093	0.844907
	0	13	8	13.3705	0.266743	-0.573907	216.127	2.33471	168.943	-11.3208	82.1808	4.62009e-06	0.999995	1.21269e-05	0.999988
	0	13	9	14.6097	0.238957	-0.62168	222.173	2.34669	193.782	-4.00088	52.9957	2.77647e-06	0.999997	4.43742e-08	1
	0	13	10	16.527	0.594615	-0.225764	172.54	2.23689	121.721	12.1394	110.028	0.000249728	0.99975	0.428877	0.571123
	0	13	11	18.1719	0.144486	-0.840175	239.854	2.37995	187.699	9.55557	14.0861	3.89162e-07	1	7.12595e-08	1
	0	13	12	18.7109	0.150043	-0.823784	173.031	2.23812	122.334	-8.50841	122.188	2.74754e-06	0.999997	0.0109206	0.989079
	0	13	13	20.4392	0.150043	-0.823784	191.034	2.28111	99.8084	-19.6738	159.532	1.58068e-06	0.999998	0.588067	0.411933
	0	13	14	21.534	0.261186	-0.58305	218.058	2.33857	185.239	-2.42509	63.9461	4.11253e-06	0.999996	2.44826e-07	1
	0	13	15	28.536	0.205614	-0.686946	263.846	2.42135	235.24	6.27386	6.3934	6.74102e-07	0.999999	4.57092e-12	1
	0	13	16	40.356	0.1945	-0.71108	226.63	2.35532	181.207	-8.94479	70.8643	1.29358e-06	0.999999	9.55199e-07	0.999999
	0	13	17	45.4853	0.161157	-0.79275	213.269	2.32893	184.498	3.24985	20.7221	1.03622e-06	0.999999	7.84082e-08	1
	0	13	18	46.4633	0.366772	-0.435604	183.986	2.26479	132.248	2.77592	65.6986	3.04711e-05	0.99997	0.000576773	0.999423
	0	13	19	55.5104	0.372329	-0.429073	154.072	2.18772	71.5422	-19.3771	131.101	7.23314e-05	0.999928	0.872324	0.127676
	0	13	20	58.9947	0.928044	-0.0324315	165.576	2.219	109.723	0.759896	30.5468	0.0019046	0.998095	0.00253902	0.997461
	0	14	1	4.94031	0.183386	-0.736634	261.236	2.41703	241.89	-2.74299	40.2225	4.90943e-07	1	2.86789e-12	1
	0	14	2	5.80722	0.405672	-0.391825	217.99	2.33844	88.4234	-1.32849	152.51	2.01394e-05	0.99998	0.736333	0.263667
	0	14	3	11.7867	0.177829	-0.749998	279.924	2.44704	195.039	17.4397	21.6895	3.01494e-07	1	3.51512e-07	1
	0	14	4	14.632	0.244515	-0.611695	250.86	2.39943	196.042	-2.97307	86.322	1.58862e-06	0.999998	1.07643e-07	1
	0	14	5	16.6937	0.183386	-0.736634	267.813	2.42783	241.988	-4.81605	68.5929	4.27137e-07	1	8.53008e-12	1
	0	14	6	17.3383	0.1945	-0.71108	258.511	2.41248	206.212	-10.9203	111.251	6.2864e-07	0.999999	6.75671e-08	1
	0	14	7	27.4634	0.150043	-0.823784	272.569	2.43548	203.287	8.20163	24.6256	2.06725e-07	1	6.00431e-09	1
	0	14	8	29.8141	0.344543	-0.462756	153.87	2.18715	121.066	-0.673537	91.6214	5.61784e-05	0.999944	0.00431716	0.995683
	0	14	9	31.07	0.333429	-0.476997	184.416	2.2658	133.784	-7.12117	190.804	2.15877e-05	0.999978	0.286327	0.713673
	0	14	10	31.7313	0.205614	-0.686946	258.278	2.41209	204.814	3.62648	74.4699	7.57511e-07	0.999999	2.97438e-08	1
	0	14	11	36.1937	0.305643	-0.514785	198.45	2.29765	163.335	1.62668	17.6503	1.12402e-05	0.999989	2.1238e-06	0.999998
	0	14	12	36.8495	0.494586	-0.305758	212.392	2.32714	128.621	3.27108	79.3478	4.93658e-05	0.999951	0.0017972	0.998203
	0	14	13	37.733	0.461243	-0.33607	212.416	2.32719	140.901	-6.2201	94.2821	3.7361e-05	0.999963	0.000423128	0.999577
	0	14	14	38.4666	0.250072	-0.601935	231.75	2.36502	196.431	-3.91066	68.3036	2.59521e-06	0.999997	4.53231e-08	1
	0	14	15	41.6175	0.277857	-0.556178	198.315	2.29735	156.663	0.273522	54.272	8.16728e-06	0.999992	1.35463e-05	0.999986
	0	14	16	42.7456	0.300086	-0.522754	191.791	2.28283	150.736	-4.09937	72.0073	1.24722e-05	0.999988	5.37073e-05	0.999946
	0	14	17	45.5742	0.250072	-0.601935	228.416	2.35873	216.812	1.00427	23.6955	2.79766e-06	0.999997	2.52253e-10	1
	0	14	18	46.2355	0.294529	-0.530872	194.737	2.28945	165.481	-2.40006	53.1871	1.08669e-05	0.999989	3.73817e-06	0.999996
	0.2	15	1	15.8271	0.622415	-0.20592	165.476	2.21873	114.494	-1.43366	77.5868	0.000355066	0.999645	0.00456978	0.99543
	0.2	15	2	19.017	0.555728	-0.255138	178.412	2.25142	86.2576	0.708922	103.441	0.000166171	0.999834	0.171998	0.828002
	0.2	15	3	21.2677	0.200062	-0.698835	212.469	2.3273	172.296	-9.57923	82.2536	1.99996e-06	0.999998	5.42897e-06	0.999995
	0.2	15	4	27.3863	0.272307	-0.564942	171.213	2.23354	133.19	3.90208	11.6834	1.58266e-05	0.999984	0.000121473	0.999879
	0.2	15	5	35.6722	0.266749	-0.573897	178.712	2.25215	145.36	1.48454	65.0324	1.19973e-05	0.999988	9.84219e-05	0.999902
	0.2	15	6	36.9392	0.728003	-0.137867	159.684	2.20326	103.992	-2.98009	82.8692	0.000771712	0.999228	0.014655	0.985345
	0.2	15	7	38.6398	0.205619	-0.686936	172.556	2.23693	150.046	0.444339	54.2545	6.52858e-06	0.999993	3.3635e-05	0.999966
	0.2	15	8	42.252	0.355666	-0.448958	124.858	2.09642	20.8627	-3.06575	143.716	0.000159827	0.99984	0.950271	0.0497292
	0.2	15	9	43.5024	0.261192	-0.58304	170.365	2.23138	143.211	-3.68736	39.4276	1.42344e-05	0.999986	7.49927e-05	0.999925
	0.2	15	10	48.2816	0.111146	-0.954108	265.501	2.42407	255.385	-0.429073	25.2523	1.03059e-07	1	8.79497e-14	1
	0.2	15	11	50.7602	0.177833	-0.749988	230.778	2.36319	208.111	0.811424	44.8559	8.90191e-07	0.999999	2.55092e-09	1
	0.2	16	1	2.95091	0.238963	-0.621669	168.166	2.22574	128.717	0.472715	48.2229	1.15774e-05	0.999988	0.000416995	0.999583
	0.2	16	2	11.0979	0.194505	-0.71107	160.43	2.20528	118.934	-4.52614	84.5302	8.1782e-06	0.999992	0.0035772	0.996423
	0.2	16	3	23.4906	0.338994	-0.469808	147.017	2.16737	102.642	-2.87392	83.7683	6.56849e-05	0.999934	0.0170629	0.982937
	0.2	16	4	33.2659	0.194505	-0.71107	206.052	2.31398	158.421	12.9516	9.53902	2.16583e-06	0.999998	1.13462e-05	0.999989
	0.2	16	5	37.6672	0.24452	-0.611685	171.654	2.23465	107.614	-9.38221	124.559	1.11914e-05	0.999989	0.0503995	0.9496
	0.2	16	6	40.0235	0.233406	-0.631889	175.308	2.2438	112.924	3.81982	122.773	8.73659e-06	0.999991	0.145547	0.854453
	0.2	16	7	40.6293	0.116703	-0.932919	177.764	2.24984	141.423	13.833	39.9727	1.28451e-06	0.999999	0.000699336	0.999301
	0.2	16	8	42.3965	0.24452	-0.611685	199.251	2.2994	138.614	-4.25555	109.522	5.25132e-06	0.999995	0.00110331	0.998897
	0.2	16	9	50.8936	0.150047	-0.823774	140.01	2.14616	99.6203	3.45372	48.9378	8.78918e-06	0.999991	0.0102733	0.989727
	0.2	17	1	11.2924	0.138932	-0.857198	251.489	2.40052	225.405	-4.15147	65.1381	2.6411e-07	1	2.04253e-10	1
	0.2	17	2	11.9593	0.194505	-0.71107	221.192	2.34477	190.336	-0.161715	26.3805	1.47625e-06	0.999999	3.44707e-08	1
	0.2	17	3	13.054	0.172276	-0.763776	245.074	2.3893	227.52	0.669507	20.382	5.77904e-07	0.999999	2.8104e-11	1
	0.2	17	4	14.3989	0.283421	-0.547568	170.489	2.2317	136.201	-18.7334	144.222	1.83473e-05	0.999982	0.0189671	0.981033
	0.2	17	5	24.8021	0.100031	-0.999865	174.48	2.24175	136.291	0.423253	83.29	1.02144e-06	0.999999	0.000604649	0.999395
	0.2	17	6	50.4545	0.188947	-0.723659	174.04	2.24065	153.067	0.00295015	19.1305	4.91443e-06	0.999995	1.07739e-05	0.999989
	5	18	1	0	0.133372	-0.874937	152.212	2.18245	107.349	17.5647	27.3888	4.23325e-06	0.999996	0.218254	0.781746
	5	18	2	1.27814	0.227843	-0.642364	208.319	2.31873	153.726	-8.28632	131.408	3.32996e-06	0.999997	0.000460998	0.999539
	5	18	3	3.77886	0.294529	-0.530872	154.324	2.18843	65.4697	-19.5799	238.624	3.3482e-05	0.999967	0.998499	0.00150079
	5	18	4	4.89029	0.200057	-0.698845	163.671	2.21397	108.665	-24.5763	214.929	7.96062e-06	0.999992	0.943921	0.0560789
	5	18	5	5.76832	0.344543	-0.462756	96.9778	1.98667	59.6021	-38.3984	256.549	0.000439808	0.99956	0.999995	5.27885e-06
	5	18	6	6.45185	0.722429	-0.141205	47.069	1.67273	22.9163	-25.6862	216.502	0.0488501	0.95115	0.999399	0.000601461
	5	18	7	9.45827	0.222286	-0.653088	218.469	2.33939	187.799	-3.82867	52.7158	2.39758e-06	0.999998	1.19596e-07	1
	5	18	8	12.4758	0.3112	-0.50696	170.58	2.23193	125.029	-1.73455	101.936	2.47873e-05	0.999975	0.00422167	0.995778
	5	18	9	13.5317	0.705758	-0.151344	62.1983	1.79378	24.022	-18.5216	245.162	0.0193303	0.98067	0.999672	0.000327641
	5	18	10	34.1153	0.250072	-0.601935	198.594	2.29797	145.941	-2.82102	118.343	5.74023e-06	0.999994	0.000873253	0.999127
	5	18	11	39.528	0.255629	-0.59239	189.497	2.2776	148.284	-0.267227	71.8679	7.81271e-06	0.999992	7.78259e-05	0.999922
	5	18	12	46.3244	0.283415	-0.547578	172.177	2.23598	146.523	-12.898	125.526	1.74859e-05	0.999983	0.00108862	0.998911
	5	18	13	49.253	0.277857	-0.556178	157.907	2.1984	107.21	-4.61269	49.488	2.50137e-05	0.999975	0.00644377	0.993556
	5	18	14	49.9643	0.288972	-0.539145	143.817	2.15781	111.157	-4.38358	97.0228	4.41521e-05	0.999956	0.0119425	0.988058
	5	19	1	15.6434	1.07809	0.0326537	97.3262	1.98823	27.4585	-7.87827	241.506	0.0208315	0.979169	0.999919	8.1335e-05
	5	19	2	18.4053	0.422343	-0.374334	129.8	2.11327	60.7166	-16.0348	198.151	0.000234552	0.999765	0.982716	0.0172839
	5	19	3	19.1944	12.248	1.08806	36.2278	1.55904	10.7069	-28.5556	192.342	0.999907	9.30254e-05	0.999697	0.000302649
	5	19	4	32.5149	1.22813	0.0892443	114.056	2.05712	47.6025	-23.5549	170.143	0.0219792	0.978021	0.993276	0.00672443
	5	19	5	34.0987	0.205614	-0.686946	201.075	2.30336	149.764	5.2445	216.422	2.918e-06	0.999997	0.997457	0.00254259
	5	19	6	44.0793	0.211172	-0.675364	217.217	2.33689	187.277	-9.06879	80.597	2.10084e-06	0.999998	4.57326e-07	1
	5	19	7	50.6256	9.36935	0.97171	31.3684	1.49649	5.82785	-11.1834	240.062	0.999612	0.000387759	0.999778	0.000222127
	5	20	1	10.2085	0.616843	-0.209825	69.6996	1.84323	25.605	-11.4436	237.666	0.0087689	0.991231	0.999718	0.000281699
	5	20	2	26.202	0.572386	-0.242311	114.13	2.0574	26.4201	-7.32879	287.018	0.00112099	0.998879	1	3.24681e-07
	5	20	3	27.6524	32.3426	1.50977	45.9072	1.66188	8.27071	-5.77561	245.274	1	1.99228e-07	0.999971	2.85217e-05
	5	21	1	12.7036	0.783558	-0.105929	70.4909	1.84813	28.1268	-17.7729	180.666	0.017999	0.982001	0.989013	0.0109869
	5	21	2	13.8984	1.93944	0.287677	49.9645	1.69866	20.7457	-6.67239	194.453	0.553178	0.446822	0.996361	0.00363913
	5	21	3	32.3037	27.6913	1.44234	43.5344	1.63883	8.74245	-26.5951	211.179	0.999999	5.94688e-07	0.999539	0.00046091
	3	22	1	0.455697	0.405681	-0.391815	124.021	2.0935	101.693	-13.6173	103.095	0.000249807	0.99975	0.0878202	0.91218
	3	22	2	1.40599	0.255635	-0.59238	158.142	2.19905	127.56	-15.9976	128.221	1.92603e-05	0.999981	0.01806	0.98194
	3	22	3	2.09509	0.18339	-0.736624	199.719	2.30042	166.379	-17.453	145.422	2.15576e-06	0.999998	0.000329464	0.999671
	3	22	4	2.62304	0.42791	-0.368647	114.161	2.05752	49.0976	-13.1218	175.118	0.000421453	0.999579	0.961698	0.0383024
	3	22	5	27.8309	0.288978	-0.539134	167.087	2.22294	123.725	-8.80721	96.3653	2.15274e-05	0.999978	0.0039822	0.996018
	3	22	6	29.1201	0.405681	-0.391815	128.87	2.11015	65.0179	-13.0411	171.3	0.000211795	0.999788	0.910704	0.0892963
	3	22	7	30.3205	18.139	1.25861	52.1175	1.71698	17.7109	-30.3473	249.859	0.999992	8.38372e-06	0.999952	4.83296e-05
	3	22	8	50.7824	0.555728	-0.255138	112.983	2.05301	45.5232	-13.0893	299.232	0.00105162	0.998948	0.999999	7.33567e-07
	3	22	9	51.6605	8.33592	0.920953	53.3562	1.72718	14.0197	-26.1532	220.126	0.999134	0.000865992	0.999574	0.00042591
	3	23	1	2.02285	0.227848	-0.642354	194.29	2.28845	149.525	-16.4627	144.483	4.78599e-06	0.999995	0.00249344	0.997507
	3	23	2	2.81754	0.194505	-0.71107	214.169	2.33076	154.793	-16.5868	116.991	1.75823e-06	0.999998	0.000573353	0.999427
	3	23	3	4.11794	0.255635	-0.59238	210.538	2.32333	181.865	-9.45669	106.401	4.57897e-06	0.999995	2.70058e-06	0.999997
	3	23	4	6.46867	0.322322	-0.49171	167.321	2.22355	73.2104	-10.4261	191.032	3.0504e-05	0.999969	0.96018	0.0398202
	3	23	5	9.28621	0.539056	-0.268366	103.616	2.01543	51.6173	-14.364	225.291	0.00132706	0.998673	0.998052	0.00194844
	3	23	6	10.4199	0.928066	-0.0324214	58.4623	1.76688	27.8348	-20.871	214.83	0.0544025	0.945598	0.9982	0.00180029
	3	23	7	15.4492	0.0889165	-1.05102	150.68	2.17805	137.794	5.98686	132.192	1.95565e-06	0.999998	0.0678651	0.932135
	3	23	8	16.3106	0.266749	-0.573897	182.48	2.26122	133.472	0.0642842	99.7895	1.08159e-05	0.999989	0.0018819	0.998118
	3	23	9	17.8611	17.1164	1.23341	37.0863	1.56921	4.8619	-5.5053	152.14	0.999986	1.35065e-05	0.962879	0.0371214
	3	23	10	36.7225	0.761347	-0.118417	72.6823	1.86143	27.9042	-24.891	189.716	0.0148393	0.985161	0.998354	0.00164574
	3	23	11	38.5342	2.26181	0.354457	66.8301	1.82497	20.1088	-22.3159	166.162	0.562114	0.437886	0.995607	0.00439343
	3	23	12	40.9238	0.100031	-0.999865	127.741	2.10633	109.486	-28.3554	185.412	6.42459e-06	0.999994	0.943012	0.0569877
	3	23	13	41.6018	2.94536	0.469138	36.4892	1.56216	11.6074	-31.0855	209.87	0.919371	0.0806287	0.99991	9.02951e-05
	3	23	14	45.7531	11.0201	1.04218	38.7987	1.58882	13.7156	-26.3672	197.108	0.999833	0.000166906	0.999314	0.000685863
	3	23	15	58.2347	1.76166	0.245921	51.9874	1.7159	21.5234	-16.7074	135.378	0.438571	0.561429	0.97024	0.0297605
	3	24	1	1.54492	0.394567	-0.403879	144.047	2.1585	68.029	-9.56977	87.059	0.000118786	0.999881	0.34817	0.65183
	3	24	2	3.90121	0.411239	-0.385906	113.772	2.05603	76.6629	-17.5557	199.576	0.000376753	0.999623	0.967007	0.0329927
	3	24	3	8.76383	0.272307	-0.564942	147.839	2.16979	93.5299	-21.0192	150.922	3.23444e-05	0.999968	0.737201	0.262799
	3	24	4	12.6984	0.250078	-0.601925	130.572	2.11585	86.2344	-16.5139	131.037	4.60896e-05	0.999954	0.51617	0.48383
	3	24	5	15.0491	0.200062	-0.698835	175.56	2.24443	128.22	-11.4539	84.3211	5.51462e-06	0.999994	0.00293111	0.997069
	3	24	6	37.0115	0.222291	-0.653078	175.542	2.24438	146.538	-7.60521	62.8564	7.49819e-06	0.999993	0.000110345	0.99989
	3	24	7	46.1754	13.821	1.14054	51.8935	1.71511	3.91688	-15.3126	221.421	0.999955	4.54621e-05	0.998549	0.00145146
	3	25	1	5.15715	0.222291	-0.653078	259.361	2.4139	185.468	7.20015	28.3345	9.60804e-07	0.999999	1.25358e-07	1
	3	25	2	7.49677	0.261192	-0.58304	236.756	2.3743	210.048	-3.67537	34.1184	2.69682e-06	0.999997	1.53018e-09	1
	3	25	3	9.95864	0.227848	-0.642354	230.27	2.36224	201.08	-7.50358	66.8335	1.9675e-06	0.999998	2.50158e-08	1
	3	25	4	11.8481	0.266749	-0.573897	199.597	2.30015	128.063	-10.9337	124.103	6.90723e-06	0.999993	0.00729363	0.992706
	3	25	5	13.2152	0.30565	-0.514775	189.538	2.2777	145.901	1.81563	72.0661	1.40578e-05	0.999986	0.000129626	0.99987
	3	25	6	13.8654	0.255635	-0.59238	195.609	2.29139	175.665	-4.11533	51.9326	6.65535e-06	0.999993	8.55485e-07	0.999999
	3	25	7	16.3328	0.250078	-0.601925	180.492	2.25646	165.57	-10.9553	87.2729	9.31601e-06	0.999991	2.06297e-05	0.999979
	3	25	8	23.5184	0.222291	-0.653078	217.435	2.33733	190.185	-8.03379	63.8801	2.45854e-06	0.999998	1.64505e-07	1
	3	25	9	24.9355	0.138932	-0.857198	176.576	2.24693	116.987	-21.1485	150.083	2.02282e-06	0.999998	0.251876	0.748124
	3	25	10	36.089	0.400124	-0.397805	131.605	2.11927	49.3413	-6.85206	165.453	0.000184825	0.999815	0.950715	0.0492848
	3	25	11	36.6614	12.5205	1.09762	41.6107	1.6192	13.6909	-47.1114	322.502	0.999918	8.15667e-05	1	3.47802e-09
	3	25	12	50.8158	0.316765	-0.499263	187.322	2.27259	108.634	-17.9424	195.768	1.68014e-05	0.999983	0.714901	0.285099
	3	25	13	52.8942	7.1022	0.851393	52.2076	1.71773	16.3724	-34.4704	232.036	0.997954	0.00204626	0.999984	1.60505e-05
	5	26	1	2.98975	0.772444	-0.112133	105.533	2.02339	57.9567	-7.87348	129.332	0.00443492	0.995565	0.678951	0.321049
	5	26	2	9.7528	0.2723	-0.564952	173.776	2.23999	129.662	-9.93323	106.216	1.47103e-05	0.999985	0.0030508	0.996949
	5	26	3	10.5308	0.694644	-0.158238	126	2.10037	64.8544	-0.318099	121.857	0.00156566	0.998434	0.652106	0.347894
	5	26	4	13.415	0.2334	-0.631899	209.124	2.3204	193.541	-8.92563	72.1341	3.52459e-06	0.999996	1.27473e-07	1
	5	26	5	20.3558	0.288972	-0.539145	120.587	2.0813	100.376	-7.77078	90.7339	0.000100896	0.999899	0.0318976	0.968102
	5	26	6	21.0949	0.778001	-0.10902	79.3175	1.89937	39.1992	-9.81376	82.8632	0.0119913	0.988009	0.738001	0.261999
	5	26	7	22.4287	0.338986	-0.469818	141.469	2.15066	107.131	-6.1659	61.5622	7.83221e-05	0.999922	0.00889287	0.991107
	5	26	8	32.3704	0.4668	-0.330869	97.7591	1.99016	60.2217	0.37966	47.9849	0.00104706	0.998953	0.172818	0.827182
	5	26	9	33.404	1.70604	0.23199	112.075	2.04951	52.5843	4.02479	54.2694	0.0938452	0.906155	0.287952	0.712048
	5	26	10	35.6436	0.333429	-0.476997	111.07	2.0456	93.9935	-1.46246	24.4251	0.000221183	0.999779	0.0146695	0.985331
	5	26	11	41.3563	0.361215	-0.442235	123.213	2.09066	79.7078	-13.0343	118.122	0.000177837	0.999822	0.400538	0.599462
	5	26	12	43.3513	0.416786	-0.380087	148.59	2.17199	112.334	-9.0899	98.6866	0.000124949	0.999875	0.0142883	0.985712
	5	26	13	51.198	0.222286	-0.653088	159.425	2.20256	132.157	-0.106275	26.7162	1.22719e-05	0.999988	0.000192974	0.999807
	5	26	14	56.1105	0.305643	-0.514785	151.317	2.17989	90.7602	-11.1308	93.6945	4.12879e-05	0.999959	0.11888	0.88112
	5	26	15	56.8941	0.244515	-0.611695	182.921	2.26226	140.599	-5.48791	70.2067	8.11774e-06	0.999992	0.000208689	0.999791
	5	26	16	58.5112	0.2723	-0.564952	165.764	2.21949	113.003	-7.09879	108.133	1.85457e-05	0.999981	0.0154067	0.984593
	5	26	17	59.4948	0.222286	-0.653088	210.62	2.3235	192.657	-3.68797	54.1077	2.90711e-06	0.999997	5.42777e-08	1
	5	27	1	0	0.200057	-0.698845	147.053	2.16747	84.6607	-13.7156	128.513	1.38653e-05	0.999986	0.566751	0.433249
	5	27	2	1.16144	0.716872	-0.144558	68.3591	1.8348	36.3797	-15.875	178.113	0.0149274	0.985073	0.98123	0.0187696
	5	27	3	5.49046	0.872472	-0.0592483	92.3211	1.9653	28.5093	-2.05	216.217	0.0109618	0.989038	0.999854	0.000145513
	5	27	4	7.99674	0.683529	-0.165243	57.6469	1.76078	42.6388	-30.9556	212.204	0.0224335	0.977567	0.999813	0.000187408
	5	27	5	9.26377	0.672415	-0.172363	67.8082	1.83128	25.5027	-2.08659	107.933	0.0125499	0.98745	0.795108	0.204892
	5	27	6	13.6539	0.261186	-0.58305	188.688	2.27574	159.662	-2.65332	86.0548	8.55261e-06	0.999991	2.72108e-05	0.999973
	5	27	7	14.7376	0.122257	-0.912725	188.932	2.27631	164.004	-6.72253	60.377	1.00432e-06	0.999999	7.98496e-06	0.999992
	5	27	8	25.7741	0.222286	-0.653088	187.176	2.27225	164.267	-5.29703	65.6012	5.3826e-06	0.999995	7.31343e-06	0.999993
	5	27	9	26.2798	0.238957	-0.62168	202.026	2.30541	183.683	-9.01241	69.6639	4.54406e-06	0.999995	6.31973e-07	0.999999
	5	27	10	26.9022	25.7685	1.41109	43.3181	1.63667	6.25951	-30.8063	206.488	0.999999	9.58778e-07	0.9999	0.00010023
	5	27	11	53.0597	0.733544	-0.134574	105.8	2.02449	64.0277	-2.52811	48.7337	0.00362855	0.996371	0.16691	0.83309
	5	27	12	55.5659	0.577943	-0.238115	56.4231	1.75146	26.4399	-30.0957	208.754	0.0149902	0.98501	0.999823	0.000177008
	5	27	13	56.8607	3.13423	0.496131	54.4526	1.73602	15.884	-18.0065	134.638	0.889824	0.110176	0.981555	0.0184452
	5	28	1	2.08949	0.205614	-0.686946	142.364	2.1534	79.3439	-13.2965	102.229	1.76101e-05	0.999982	0.369359	0.630641
	5	28	2	2.82859	6.54632	0.815997	53.8867	1.73148	14.2398	-6.955	147.529	0.996764	0.00323642	0.946562	0.0534377
	5	28	3	11.2199	0.422343	-0.374334	114.896	2.0603	30.5426	6.14483	139.374	0.000393408	0.999607	0.992666	0.00733436
	5	28	4	13.8206	0.3112	-0.50696	145.631	2.16325	110.767	-14.2376	122.809	5.22961e-05	0.999948	0.061398	0.938602
	5	28	5	21.3895	0.166714	-0.778027	145.421	2.16263	72.2377	-13.6235	152.577	9.21235e-06	0.999991	0.758334	0.241666
	5	28	6	23.9069	0.222286	-0.653088	197.865	2.29637	145.161	-8.16082	102.995	4.03228e-06	0.999996	0.000373207	0.999627
	5	28	7	46.8579	0.344543	-0.462756	133.025	2.12393	106.109	-11.9823	113.636	0.000109015	0.999891	0.0531542	0.946846
	5	28	8	47.7748	0.644629	-0.19069	133.406	2.12518	66.9396	-8.18745	137.829	0.000948622	0.999051	0.64797	0.35203
	5	28	9	48.7362	0.539043	-0.268376	126.957	2.10366	77.9146	-8.18776	99.47	0.000595991	0.999404	0.207771	0.792229
	5	28	10	49.8365	0.277857	-0.556178	177.435	2.24904	157.644	-0.595239	23.4424	1.41622e-05	0.999986	6.10508e-06	0.999994
	5	28	11	50.3644	0.644629	-0.19069	170.637	2.23207	97.6669	-13.7631	182.715	0.000361727	0.999638	0.707491	0.292509
	5	28	12	59.7616	0.2334	-0.631899	153.607	2.18641	131.476	-9.21302	80.8399	1.70324e-05	0.999983	0.0012494	0.998751
	3	29	1	0.650202	0.344551	-0.462746	136.011	2.13358	79.5709	-17.2532	143.299	9.86201e-05	0.999901	0.72466	0.27534
	3	29	2	2.01729	3.30102	0.518649	90.7059	1.95764	29.0362	-5.39246	149.858	0.810008	0.189992	0.944643	0.0553568
	3	29	3	5.7629	1.03921	0.0167038	105.917	2.02497	38.374	-8.33602	155.265	0.0138518	0.986148	0.934354	0.0656464
	3	29	4	7.75796	0.555728	-0.255138	76.7412	1.88503	26.9284	-14.6822	110.807	0.00453007	0.99547	0.93672	0.0632796
	3	29	5	10.3532	0.277864	-0.556168	186.402	2.27045	162.78	-1.39764	99.6378	1.11079e-05	0.999989	3.95185e-05	0.99996
	3	29	6	11.4647	0.250078	-0.601925	199.595	2.30015	149.78	-11.1948	87.119	5.59551e-06	0.999994	0.000195145	0.999805
	3	29	7	13.1541	0.316765	-0.499263	173.318	2.23884	133.726	-9.45598	71.698	2.43657e-05	0.999976	0.000879463	0.999121
	3	29	8	15.7215	0.377895	-0.422629	167.082	2.22293	130.142	-6.9758	70.6157	5.27034e-05	0.999947	0.000891544	0.999108
	3	30	1	0.250078	0.222291	-0.653078	226.453	2.35498	186.234	-7.61157	86.4191	1.98317e-06	0.999998	5.58486e-07	0.999999
	3	30	2	4.80705	0.150047	-0.823774	228.747	2.35935	211.972	-10.1191	88.531	5.69162e-07	0.999999	9.26475e-09	1
	3	30	3	6.04076	0.24452	-0.611685	245.969	2.39088	151.292	-2.20218	114.598	1.76191e-06	0.999998	0.000390804	0.999609
	3	30	4	7.40785	0.177833	-0.749988	178.799	2.25236	141.254	-11.346	90.3869	3.59661e-06	0.999996	0.00064368	0.999356
	3	30	5	9.43626	0.12226	-0.912715	228.969	2.35978	182.293	0.787691	87.4106	3.24093e-07	1	1.54949e-06	0.999998
	3	30	6	10.0587	0.350109	-0.455797	202.652	2.30675	120.142	12.1522	179.508	1.63923e-05	0.999984	0.999694	0.000306262
	3	30	7	16.7608	0.250078	-0.601925	202.713	2.30688	176.199	-3.13764	72.1525	5.16999e-06	0.999995	1.37409e-06	0.999999
	3	30	8	18.0167	0.30565	-0.514775	184.627	2.2663	105.228	6.80857	93.8062	1.59644e-05	0.999984	0.0930669	0.906933
	3	30	9	26.5193	0.444582	-0.352048	188.373	2.27502	90.6116	-6.47896	187.165	5.54216e-05	0.999945	0.922621	0.0773786
	3	30	10	28.9312	0.311208	-0.50695	119.772	2.07835	86.0763	-18.0607	138.625	0.00012889	0.999871	0.643246	0.356754
	3	30	11	29.5981	0.30565	-0.514775	129.065	2.11081	84.7273	-6.92461	104.611	8.67523e-05	0.999913	0.140388	0.859612
	3	30	12	30.4539	0.283421	-0.547568	166.353	2.22103	107.16	-7.59629	60.031	2.06738e-05	0.999979	0.0111658	0.988834
	3	30	13	35.8111	0.261192	-0.58304	171.388	2.23398	151.725	0.423026	28.0128	1.38181e-05	0.999986	1.42026e-05	0.999986
	3	30	14	38.1618	0.311208	-0.50695	170.29	2.23119	130.669	-3.37842	61.4513	2.49911e-05	0.999975	0.000498508	0.999501
	3	30	15	45.3252	0.566842	-0.246538	91.9039	1.96333	54.0327	-3.70772	69.583	0.00247529	0.997525	0.329764	0.670236
	3	30	16	46.8868	0.105588	-0.976384	178.176	2.25085	124.751	11.0366	114.302	1.01241e-06	0.999999	0.328181	0.671819
	3	30	17	48.2205	0.45014	-0.346653	101.289	2.00556	61.2986	-16.2504	128.737	0.000810084	0.99919	0.839254	0.160746
	3	30	18	53.2943	6.69652	0.825849	39.0988	1.59216	9.24397	-9.93287	145.786	0.99771	0.00229043	0.946441	0.0535589
	3	31	1	2.63971	0.272307	-0.564942	186.976	2.27179	154.08	1.31173	43.6236	1.02426e-05	0.99999	1.44024e-05	0.999986
	3	31	2	5.21273	0.24452	-0.611685	175.092	2.24327	143.229	9.02286	17.7732	1.01278e-05	0.99999	5.63054e-05	0.999944
	3	31	3	8.05805	0.211177	-0.675354	223.946	2.35014	126.978	-19.1798	151.551	1.78522e-06	0.999998	0.0691861	0.930814
	3	31	4	8.8972	0.483483	-0.315619	106.985	2.02932	55.7444	-5.85967	208.745	0.000816389	0.999184	0.998092	0.0019076
	3	31	5	9.83638	0.227848	-0.642354	222.145	2.34664	155.311	-13.4123	152.196	2.37777e-06	0.999998	0.00123214	0.998768
	3	31	6	10.6922	0.255635	-0.59238	192.255	2.28388	134.631	-5.62156	122.986	7.26379e-06	0.999993	0.00321956	0.99678
	3	31	7	11.8926	0.561285	-0.250816	237.207	2.37513	174.887	-0.343518	76.1154	5.14513e-05	0.999949	2.25567e-06	0.999998
	3	31	8	12.7373	0.789134	-0.102849	233.551	2.36838	93.6662	-0.748283	183.3	0.000249747	0.99975	0.972362	0.0276379
	3	31	9	41.3406	0.261192	-0.58304	177.797	2.24992	145.382	-5.27794	42.6697	1.15137e-05	0.999988	7.23829e-05	0.999928
	3	31	10	41.9908	18	1.25527	41.4365	1.61738	8.63011	-24.514	199.353	0.99999	9.52137e-06	0.998877	0.00112314
	3	32	1	0.555728	0.566842	-0.246538	117.707	2.0708	71.8825	0.929542	53.8066	0.000960756	0.999039	0.0935827	0.906417
	3	32	2	1.86169	0.444582	-0.352048	120.604	2.08136	103.482	-0.0725378	54.3821	0.000379387	0.999621	0.00721933	0.992781
	3	32	3	3.5122	0.36678	-0.435594	118.875	2.07509	91.4928	-1.12367	37.1595	0.000218263	0.999782	0.0181823	0.981818
	3	32	4	5.24051	0.316765	-0.499263	159.979	2.20406	121.718	2.98681	39.822	3.56038e-05	0.999964	0.00080829	0.999192
	3	32	5	6.48534	0.522384	-0.28201	196.724	2.29386	153.405	-5.97104	76.4416	8.58323e-05	0.999914	4.73082e-05	0.999953
	3	32	6	8.65268	0.294536	-0.530862	170.4	2.23147	125.53	-7.95368	106.813	2.0815e-05	0.999979	0.00420391	0.995796
	3	32	7	10.7922	0.51127	-0.29135	89.0423	1.9496	28.6308	1.93954	119.027	0.00200673	0.997993	0.910789	0.0892113
	3	32	8	12.4094	0.766904	-0.115259	95.5794	1.98036	50.6168	-20.4785	240.546	0.0060882	0.993912	0.999253	0.000747123
	3	32	9	14.9213	13.2041	1.12071	32.76	1.51534	11.1478	-6.16147	120.437	0.999938	6.22764e-05	0.875821	0.124179
	3	32	10	29.7092	0.616858	-0.209815	102.277	2.00978	55.5488	-9.09264	171.259	0.00220762	0.997792	0.945422	0.0545779
	3	32	11	30.9707	1.10034	0.0415273	61.351	1.78782	24.2481	-5.31733	138.381	0.0824589	0.917541	0.916321	0.0836788
	3	32	12	34.5496	0.683545	-0.165233	78.7012	1.89598	43.3446	-10.3355	120.443	0.00797954	0.99202	0.790939	0.209061
	3	32	13	50.9436	0.311208	-0.50695	165.051	2.21762	123.522	-1.70616	77.5351	2.89984e-05	0.999971	0.00174179	0.998258
	3	32	14	58.168	1.82279	0.260736	49.29	1.69276	27.5685	-33.2693	230.152	0.500104	0.499896	0.999966	3.39055e-05
	6	33	1	3.8122	1.13366	0.0544822	54.8017	1.73879	20.1484	-12.9909	209.514	0.119844	0.880156	0.997144	0.00285594
	6	33	2	5.37376	1.03363	0.014365	57.1553	1.75706	25.3737	-23.7415	168.344	0.0810908	0.918909	0.996983	0.00301733
	6	33	3	6.84085	1.03919	0.0166936	73.0698	1.86374	36.1118	-19.9871	153.958	0.0422582	0.957742	0.984165	0.0158345
	6	33	4	8.85809	1.42263	0.153092	66.1916	1.8208	26.9062	-26.7021	227.859	0.160324	0.839676	0.999665	0.000334568
	6	33	5	11.6478	0.322315	-0.49172	138.721	2.14214	71.597	4.68205	114.216	7.31067e-05	0.999927	0.717623	0.282377
	6	33	6	12.8092	0.494586	-0.305758	110.378	2.04288	78.4393	-23.2449	181.813	0.000776196	0.999224	0.970064	0.0299359
	6	33	7	16.8215	0.444572	-0.352058	135.424	2.13169	51.2723	-15.8781	235.035	0.000232799	0.999767	0.99897	0.00102971
	6	33	8	17.5161	0.322315	-0.49172	125.531	2.09875	100.726	-21.7913	154.769	0.000115483	0.999885	0.673763	0.326237
	6	33	9	18.0663	0.522372	-0.28202	82.4844	1.91637	54.887	-25.0449	203.269	0.0028688	0.997131	0.997212	0.00278821
	6	33	10	19.7612	0.455686	-0.341334	62.2406	1.79407	36.6892	-22.344	169.503	0.00559519	0.994405	0.993438	0.00656179
	6	33	11	21.1561	1.33372	0.125063	56.6389	1.75311	17.3382	-24.3998	195.916	0.182305	0.817695	0.998626	0.00137432
	6	33	12	22.9455	6.29625	0.799082	45.9549	1.66233	12.4029	-16.0965	161.013	0.99651	0.00349026	0.980865	0.0191346
	6	33	13	30.8477	8.09121	0.908013	49.8659	1.6978	15.3185	3.03439	189.373	0.999017	0.000982559	0.999747	0.000253019
	6	33	14	40.5727	0.866915	-0.0620234	63.5779	1.80331	29.1097	-22.2933	151.111	0.0343793	0.965621	0.993859	0.00614095
	6	33	15	42.1454	12.4702	1.09587	55.4939	1.74424	13.2943	-34.9907	242.688	0.999915	8.51588e-05	0.99999	1.03215e-05
	6	33	16	58.4112	1.58379	0.199697	57.5407	1.75998	23.772	-5.00235	205.399	0.29077	0.70923	0.998956	0.00104432
	6	34	1	0.700201	0.2723	-0.564952	182.169	2.26048	136.977	-6.96289	99.7688	1.16539e-05	0.999988	0.000850147	0.99915
	6	34	2	4.12896	0.183386	-0.736634	188.623	2.2756	159.624	-8.86116	57.6907	2.93696e-06	0.999997	2.1234e-05	0.999979
	6	34	3	6.16843	10.8587	1.03578	52.1687	1.71741	14.0971	-25.7906	245.997	0.999809	0.000190783	0.999835	0.000164846
	6	34	4	19.6167	0.338986	-0.469818	155.691	2.19226	91.2492	-11.2227	160.534	5.04404e-05	0.99995	0.527666	0.472334
	6	34	5	20.4781	0.533486	-0.272877	83.1607	1.91992	51.728	-28.6939	209.723	0.00296847	0.997032	0.99934	0.000659793
	6	34	6	23.4512	0.266743	-0.573907	204.816	2.31136	140.302	-7.35001	151.562	6.06463e-06	0.999994	0.00835902	0.991641
	6	34	7	24.6404	0.383443	-0.416299	134.839	2.12982	60.5983	-11.3063	199.792	0.000144562	0.999855	0.986788	0.013212
	6	34	8	25.3851	0.305643	-0.514785	124.525	2.09526	82.3325	-18.066	145.922	0.000102312	0.999898	0.733659	0.266341
	6	34	9	26.4242	33.5707	1.52596	47.6585	1.67814	6.74076	-29.5381	255.613	1	1.48581e-07	0.999953	4.66174e-05
	6	35	1	0.911372	0.316757	-0.499273	166.243	2.22074	93.6644	-5.43637	117.987	2.96947e-05	0.99997	0.11597	0.88403
	6	35	2	1.66714	1.46153	0.164808	106.586	2.0277	27.7411	-24.2442	164.782	0.0555898	0.94441	0.997257	0.00274314
	6	35	3	5.30152	0.238957	-0.62168	218.251	2.33896	196.488	-3.66404	54.437	3.04617e-06	0.999997	2.83502e-08	1
	6	35	4	7.22429	0.222286	-0.653088	197.677	2.29596	185.111	-20.3963	141.644	4.05231e-06	0.999996	3.46112e-05	0.999965
	6	35	5	9.88617	0.244515	-0.611695	203.506	2.30858	163.527	-5.53871	100.262	4.71182e-06	0.999995	2.76433e-05	0.999972
	6	35	6	10.4141	21.0505	1.32326	42.4898	1.62828	10.9048	-7.177	208.718	0.999996	3.55915e-06	0.998708	0.00129211
	6	35	7	31.6757	0.672415	-0.172363	218.868	2.34018	114.382	9.40365	88.5226	0.000157909	0.999842	0.0679713	0.932029
	6	35	8	34.9434	0.322315	-0.49172	127.267	2.10471	54.1937	-10.6849	201.249	0.00010849	0.999892	0.991311	0.00868852
	6	35	9	35.7825	24.2125	1.38404	58.8931	1.77006	14.1011	-21.5213	199.453	0.999999	1.19336e-06	0.997557	0.00244344
	6	36	1	1.30593	0.288972	-0.539145	174.274	2.24123	105.193	-3.15968	122.661	1.755e-05	0.999982	0.06967	0.93033
	6	36	2	3.41209	0.227843	-0.642364	206.018	2.3139	184.469	-1.67614	41.2799	3.52879e-06	0.999996	1.38126e-07	1
	6	36	3	10.5808	0.355658	-0.448968	113.416	2.05468	53.7378	-28.4683	273.426	0.000244125	0.999756	0.999956	4.42619e-05
	6	36	4	12.1424	0.172272	-0.763786	241.238	2.38245	215.212	-4.15159	63.8109	6.31375e-07	0.999999	1.35409e-09	1
	6	36	5	13.2371	0.211172	-0.675364	227.766	2.35749	204.827	0.379346	19.4589	1.63057e-06	0.999998	2.21982e-09	1
	6	36	6	13.854	0.211172	-0.675364	219.609	2.34165	183.262	-5.31779	101.9	1.98166e-06	0.999998	1.65373e-06	0.999998
	6	36	7	14.4541	0.161157	-0.79275	205.917	2.31369	189.2	-4.81798	60.7549	1.26097e-06	0.999999	1.2571e-07	1
	6	36	8	16.0991	0.172272	-0.763786	236.738	2.37427	204.243	-2.75359	59.4919	7.01649e-07	0.999999	8.2916e-09	1
	6	36	9	16.8215	1.21146	0.0833085	207.064	2.3161	111.042	-3.00374	168.424	0.00302548	0.996975	0.546169	0.453831
	6	36	10	28.0358	31.9592	1.5046	37.4107	1.573	10.8891	-14.3931	194.098	1	2.66482e-07	0.993335	0.00666528
	0.5	37	1	0	0.483483	-0.315619	168.038	2.22541	134.978	-2.52805	69.4616	0.000125206	0.999875	0.00517765	0.994822
	0.5	37	2	1.94505	0.433468	-0.363043	130.29	2.11491	91.0942	-6.25829	90.7879	0.000251785	0.999748	0.061065	0.938935
	0.5	37	3	2.73974	0.377895	-0.422629	151.1	2.17926	124.184	-4.5907	75.7669	8.30175e-05	0.999917	0.00158434	0.998416
	0.5	37	4	4.32356	0.327879	-0.484286	183.224	2.26298	154.883	3.43188	41.4052	2.10143e-05	0.999979	1.34584e-05	0.999987
	0.5	37	5	5.11825	1.08923	0.0371182	166.086	2.22033	100.235	-4.66669	93.7427	0.00387483	0.996125	0.0290947	0.970905
	0.5	37	6	6.42421	0.12226	-0.912715	204.184	2.31002	139.411	5.14252	159.433	6.37761e-07	0.999999	0.408808	0.591192
	0.5	37	7	7.51344	0.455697	-0.341324	176.706	2.24725	91.8841	-5.82517	168.398	8.06578e-05	0.999919	0.738655	0.261345
	0.5	37	8	10.431	0.550171	-0.259503	205.202	2.31218	127.13	-10.6484	152.725	8.83443e-05	0.999912	0.0299154	0.970085
	0.5	37	9	11.3146	1.31152	0.117774	74.8283	1.87407	19.8688	-12.9421	211.949	0.0910323	0.908968	0.99758	0.00241962
	0.5	37	10	13.4931	0.744675	-0.128033	94.7894	1.97676	47.7302	-17.7045	182.029	0.00563593	0.994364	0.981055	0.0189451
	0.5	37	11	15.4715	0.527941	-0.277414	190.786	2.28055	152.533	-5.30088	64.8082	0.00010211	0.999898	3.77952e-05	0.999962
	0.5	37	12	16.3106	0.205619	-0.686936	222.35	2.34704	192.861	-5.38084	60.234	1.70534e-06	0.999998	7.0023e-08	1
	0.5	37	13	21.3344	0.300093	-0.522744	174.13	2.24087	147.215	3.29712	27.6467	1.99275e-05	0.99998	2.57076e-05	0.999974
	0.5	37	14	22.7404	0.222291	-0.653078	202.365	2.30613	167.832	3.15272	23.182	3.58556e-06	0.999996	1.18532e-06	0.999999
	0.5	37	15	23.8463	0.372338	-0.429063	125.656	2.09918	54.6869	-7.60494	175.422	0.000179375	0.999821	0.964412	0.0355879
	0.5	37	16	24.9522	0.828034	-0.0819516	58.8362	1.76964	29.9244	-15.3906	200.53	0.0374493	0.962551	0.994145	0.00585489
	0.5	37	17	26.3415	1.15036	0.0608325	47.6995	1.67851	25.4101	-16.4592	130.092	0.171376	0.828624	0.963632	0.0363685
	0.5	37	18	28.9923	0.24452	-0.611685	219.45	2.34134	197.9	-1.24201	84.0877	3.19379e-06	0.999997	8.05069e-08	1
	0.5	37	19	29.498	0.250078	-0.601925	226.713	2.35548	196.64	-5.71912	63.2509	2.90843e-06	0.999997	4.0967e-08	1
	0.5	37	20	42.1909	0.266749	-0.573897	190.447	2.27977	171.653	3.98651	28.7356	8.7398e-06	0.999991	7.97264e-07	0.999999
	0.5	37	21	42.8244	0.194505	-0.71107	193.144	2.28588	166.469	-5.01886	47.6666	3.06458e-06	0.999997	3.5972e-06	0.999996
	0.5	37	22	43.4468	0.5724	-0.242301	138.988	2.14298	92.6559	-9.80343	124.592	0.000516454	0.999484	0.165127	0.834873
	0.5	38	1	0	0.344551	-0.462746	207.254	2.3165	168.791	-11.2037	77.4094	1.39033e-05	0.999986	0.000220767	0.999779
	0.5	38	2	0.622415	1.19481	0.0773006	198.887	2.29861	102.3	-4.8175	132.619	0.00324509	0.996755	0.123155	0.876845
	0.5	38	3	3.36215	0.372338	-0.429063	200.273	2.30162	168.302	1.72927	32.7601	2.16708e-05	0.999978	1.36569e-06	0.999999
	0.5	38	4	4.13462	0.522384	-0.28201	118.072	2.07215	69.5713	-9.05684	139.157	0.000713441	0.999287	0.626741	0.373259
	0.5	38	5	6.29084	0.333437	-0.476987	147.967	2.17017	99.9319	-8.51476	121.912	6.04591e-05	0.99994	0.083962	0.916038
	0.5	38	6	8.40816	0.355666	-0.448958	211.186	2.32467	147.593	-11.8266	102.703	1.42679e-05	0.999986	0.000406042	0.999594
	0.5	38	7	10.0087	0.172276	-0.763776	208.033	2.31813	178.945	-0.0586957	77.1273	1.43952e-06	0.999999	1.31647e-06	0.999999
	0.5	38	8	12.4816	0.127817	-0.89341	220.377	2.34317	133.915	19.2462	142.545	4.56379e-07	1	0.999162	0.000837558
	0.5	38	9	19.3115	0.205619	-0.686936	213.226	2.32884	187.58	-5.49041	67.1624	2.13468e-06	0.999998	2.07194e-07	1
	0.5	38	10	19.9117	0.227848	-0.642354	215.586	2.33362	191.652	-0.229376	32.6426	2.78318e-06	0.999997	3.17034e-08	1
	0.5	38	11	20.8065	0.216734	-0.664073	226.7	2.35545	150.954	11.9105	43.4413	1.8171e-06	0.999998	0.000134982	0.999865
	0.5	38	12	21.8401	0.227848	-0.642354	223.75	2.34976	204.109	-0.809696	37.1973	2.28935e-06	0.999998	4.03742e-09	1
	0.5	38	13	24.1297	0.172276	-0.763776	199.546	2.30004	168.883	-9.84941	83.5822	1.81066e-06	0.999998	9.73721e-06	0.99999
	0.5	38	14	24.7521	0.172276	-0.763776	214.282	2.33099	165.829	-1.50397	62.2213	1.2222e-06	0.999999	4.59774e-06	0.999995
	0.5	38	15	27.9865	7.55234	0.878082	64.0556	1.80656	18.3496	-15.5698	109.767	0.998299	0.00170072	0.961236	0.0387645
	0.5	38	16	35.7833	0.261192	-0.58304	203.172	2.30786	176.837	1.98517	21.9111	5.89197e-06	0.999994	2.78571e-07	1
	0.5	38	17	37.7728	0.18339	-0.736624	255.45	2.40731	225.742	4.54748	28.9954	5.56391e-07	0.999999	6.33989e-11	1
	0.5	38	18	52.194	0.161161	-0.79274	255.834	2.40796	225.25	0.822129	38.4065	3.69897e-07	1	7.80605e-11	1
	0.5	38	19	59.4962	0.494598	-0.305748	84.6871	1.92782	40.8216	-10.0571	183.257	0.00219673	0.997803	0.982376	0.0176241
	0.5	39	1	0	0.311208	-0.50695	116.476	2.06624	97.5121	2.7571	16.846	0.00014632	0.999854	0.349768	0.650232
	0.5	39	2	8.99168	1.8339	0.263376	145.233	2.16207	38.6918	-0.49377	171.399	0.0673109	0.932689	0.993595	0.00640547
	0.5	39	3	11.6758	0.683545	-0.165233	92.3615	1.96549	37.5979	-14.1009	165.661	0.00456508	0.995435	0.963379	0.0366205
	0.5	39	4	17.511	0.311208	-0.50695	159.746	2.20343	100.38	-3.04943	87.9049	3.38544e-05	0.999966	0.0238122	0.976188
	0.5	39	5	18.5391	0.689103	-0.161716	168.219	2.22588	129.33	6.13014	23.8741	0.000503038	0.999497	0.000271955	0.999728
	0.5	39	6	20.6786	0.277864	-0.556168	178.14	2.25076	161.592	-1.63866	29.9838	1.38901e-05	0.999986	4.04208e-06	0.999996
	0.5	39	7	21.879	0.739118	-0.131286	135.297	2.13129	75.1345	0.219858	90.8186	0.00153045	0.99847	0.192918	0.807082
	0.5	39	8	53.1554	0.255635	-0.59238	211.853	2.32603	115.418	13.9683	145.217	4.43568e-06	0.999996	0.9946	0.00539963
	0.5	39	9	53.8556	0.344551	-0.462746	164.368	2.21582	133.165	-0.0440648	46.7086	4.14214e-05	0.999959	0.000236144	0.999764
	0.5	39	10	55.3283	0.466811	-0.330859	146.615	2.16618	121.79	2.9848	19.0687	0.000197093	0.999803	0.000539586	0.99946
	0.5	39	11	57.629	0.405681	-0.391815	142.588	2.15408	111.357	-2.22391	57.9093	0.00013644	0.999864	0.00373626	0.996264
	0.5	40	1	0.361223	0.444582	-0.352048	151.74	2.1811	128.518	-1.52636	56.7121	0.000143022	0.999857	0.000533998	0.999466
	0.5	40	2	1.70053	0.36678	-0.435594	123.28	2.09089	91.977	0.704993	74.5356	0.000186067	0.999814	0.0362496	0.96375
	0.5	40	3	2.72307	0.294536	-0.530862	143.191	2.15591	114.918	2.67046	29.208	4.7767e-05	0.999952	0.00136359	0.998636
	0.5	40	4	3.53443	0.233406	-0.631889	112.811	2.05235	85.6941	-7.57428	69.2949	7.77447e-05	0.999922	0.0801236	0.919876
	0.5	40	5	4.22909	0.261192	-0.58304	177.5	2.2492	155.141	-2.18138	40.5579	1.16099e-05	0.999988	1.26264e-05	0.999987
	0.5	40	6	5.12381	0.250078	-0.601925	174.39	2.24152	155.561	2.68801	21.8949	1.1074e-05	0.999989	7.03435e-06	0.999993
	0.5	40	7	6.8299	0.539056	-0.268366	138.833	2.14249	54.1811	1.49927	155.881	0.000415679	0.999584	0.980401	0.019599
	0.5	40	8	8.02471	0.644644	-0.19068	69.0032	1.83887	36.4138	-22.7739	175.187	0.0103875	0.989612	0.994786	0.00521384
	0.5	40	9	9.60298	1.01142	0.00493355	66.3883	1.82209	31.7782	-0.26275	183.964	0.0504461	0.949554	0.998233	0.00176736
	0.5	40	10	11.059	0.555728	-0.255138	75.974	1.88066	45.5005	-15.0042	161.129	0.00469916	0.995301	0.949252	0.0507482
	0.5	40	11	12.176	0.42791	-0.368647	158.478	2.19997	104.312	-9.12277	148.263	0.000103351	0.999897	0.175618	0.824382
	0.5	40	12	14.7601	0.433468	-0.363043	106.766	2.02843	54.94	-16.3129	143.657	0.000580036	0.99942	0.905068	0.0949319
	0.5	40	13	20.6342	3.26768	0.514239	76.7905	1.88531	30.0293	-4.33087	127.892	0.845914	0.154086	0.865823	0.134177
	0.5	40	14	29.7815	0.311208	-0.50695	185.984	2.26948	159.369	1.3135	30.1727	1.63754e-05	0.999984	4.84359e-06	0.999995
	0.5	40	15	31.2875	0.272307	-0.564942	202.274	2.30594	128.524	1.30592	63.7684	6.91729e-06	0.999993	0.000710111	0.99929
	0.5	40	16	49.5765	0.327879	-0.484286	176.871	2.24766	143.364	-0.169385	22.042	2.48461e-05	0.999975	4.32332e-05	0.999957
	0.5	40	17	58.2569	0.238963	-0.621669	184.447	2.26587	174.954	-1.15413	19.289	7.24651e-06	0.999993	4.30508e-07	1
	0.5	40	18	59.0294	0.338994	-0.469808	178.92	2.25266	162.235	-3.31989	51.134	2.63668e-05	0.999974	6.04969e-06	0.999994
	0	41	1	0	0.505712	-0.296096	151.054	2.17913	93.1667	11.8995	8.76465	0.000232321	0.999768	0.419184	0.580816
	0	41	2	1.21704	0.350109	-0.455797	148.041	2.17038	112.34	-6.81768	58.222	7.0663e-05	0.999929	0.00561245	0.994388
	0	41	3	2.51745	0.272307	-0.564942	151.371	2.18004	108.307	-5.09883	73.1175	2.88569e-05	0.999971	0.00825095	0.991749
	0	41	4	4.06793	0.533499	-0.272867	136.335	2.13461	105.243	-1.75499	36.1092	0.00043087	0.999569	0.00513211	0.994868
	0	41	5	5.16271	0.577957	-0.238105	179.021	2.2529	106.364	1.61423	87.9818	0.000191535	0.999808	0.0201097	0.97989
	0	41	6	6.3353	1.01142	0.00493355	203.034	2.30757	84.9525	1.3046	174.453	0.0013554	0.998645	0.982025	0.0179747
	0	41	7	10.0142	0.250078	-0.601925	209.587	2.32136	173.094	3.61213	70.4374	4.35888e-06	0.999996	3.7405e-06	0.999996
	0	41	8	10.431	0.683545	-0.165233	186.614	2.27095	84.0008	-2.19343	170.515	0.000322817	0.999677	0.927021	0.0729792
	0	41	9	11.6703	0.400124	-0.397805	224.83	2.35185	106.506	-1.38363	132.009	1.65426e-05	0.999983	0.135511	0.864489
	0	41	10	12.5261	0.283421	-0.547568	208.992	2.32013	167.079	4.6821	77.6837	6.72281e-06	0.999993	1.70681e-05	0.999983
	0	41	11	14.3044	0.161161	-0.79274	177.077	2.24816	123.325	-7.68982	92.005	2.90866e-06	0.999997	0.003324	0.996676
	0	41	12	17.2943	0.277864	-0.556168	204.51	2.31071	171.499	7.84939	11.153	7.00547e-06	0.999993	6.74195e-07	0.999999
	0	41	13	18.8281	0.444582	-0.352048	162.414	2.21062	95.8108	-2.68474	118.007	0.00010649	0.999894	0.119016	0.880984
	0	41	14	22.7682	0.566842	-0.246538	136.583	2.1354	103.551	-1.46368	62.3907	0.00053406	0.999466	0.00870795	0.991292
	0	41	15	23.7629	0.294536	-0.530862	188.017	2.2742	155.611	-3.55737	75.9622	1.29073e-05	0.999987	3.11979e-05	0.999969
	0	41	16	24.9577	0.250078	-0.601925	185.933	2.26936	124.324	-5.83666	67.5574	8.01947e-06	0.999992	0.00145096	0.998549
	0	41	17	28.7478	0.288978	-0.539134	167.326	2.22356	140.764	-1.94442	23.2799	2.13791e-05	0.999979	7.46256e-05	0.999925
	0	41	18	30.3539	0.300093	-0.522744	199.931	2.30088	167.682	-1.18854	58.5818	1.01781e-05	0.99999	3.10759e-06	0.999997
	0	41	19	35.9167	0.272307	-0.564942	192.619	2.2847	146.026	4.47901	81.4166	8.83391e-06	0.999991	0.000333817	0.999666
	0	41	20	38.273	0.222291	-0.653078	226.745	2.35554	202.799	-1.8317	40.8992	1.96968e-06	0.999998	5.85569e-09	1
	0	41	21	39.5512	0.283421	-0.547568	210.582	2.32342	161.598	-11.2459	86.3689	6.47307e-06	0.999994	3.78901e-05	0.999962
	0	41	22	41.8074	0.700217	-0.154767	150.34	2.17708	89.2017	-6.6609	102.473	0.000829323	0.999171	0.0963357	0.903664
	0	41	23	42.8911	0.327879	-0.484286	185.263	2.26779	130.688	1.8981	67.6341	1.99358e-05	0.99998	0.000678834	0.999321
	0	41	24	45.9476	0.516827	-0.286655	139.945	2.14596	81.3213	-2.79956	79.7613	0.000345146	0.999655	0.0852442	0.914756
	0	41	25	56.3119	0.355666	-0.448958	180.561	2.25662	150.094	-4.5811	62.3171	2.98388e-05	0.99997	4.68412e-05	0.999953
	0	42	1	3.32325	0.389009	-0.41004	179.069	2.25302	73.3826	-2.79074	112.826	4.25811e-05	0.999957	0.343669	0.656331
	0	42	2	4.47917	0.42791	-0.368647	216.476	2.33541	152.833	-10.3032	93.2045	2.55582e-05	0.999974	0.000127259	0.999873
	0	42	3	5.31276	0.272307	-0.564942	221.739	2.34584	186.545	-2.10545	48.4676	4.35223e-06	0.999996	1.20122e-07	1
	0	42	4	6.56315	0.238963	-0.621669	213.78	2.32997	119.248	-12.1071	103.269	3.39217e-06	0.999997	0.0120712	0.987929
	0	42	5	11.7814	0.238963	-0.621669	211.763	2.32585	136.76	-17.5508	118.989	3.5631e-06	0.999996	0.00757779	0.992422
	0	42	6	14.0432	0.439025	-0.357511	197.659	2.29592	103.073	-7.68781	165.281	4.26077e-05	0.999957	0.426674	0.573326
	0	42	7	15.4826	0.505712	-0.296096	214.718	2.33187	175.184	2.02558	61.9985	5.1481e-05	0.999949	1.40738e-06	0.999999
	0	42	8	19.306	0.227848	-0.642354	203.103	2.30772	166.022	5.93751	37.9912	3.80107e-06	0.999996	3.18692e-06	0.999997
	0	42	9	30.1316	0.188947	-0.723659	214.27	2.33096	191.146	-0.332007	48.0976	1.60666e-06	0.999998	5.40481e-08	1
	0	42	10	45.5363	0.222291	-0.653078	244.146	2.38765	217.29	1.13879	37.2747	1.32882e-06	0.999999	3.53468e-10	1
	0	42	11	47.2924	0.322322	-0.49171	146.068	2.16456	124.833	4.35671	61.4647	5.75972e-05	0.999942	0.00138174	0.998618
	0	42	12	53.2887	0.255635	-0.59238	186.654	2.27104	132.625	-2.9437	48.3775	8.43154e-06	0.999992	0.000299705	0.9997
	0	42	13	59.8852	0.111146	-0.954108	180.07	2.25544	165.891	-5.33274	53.4648	1.06583e-06	0.999999	4.47597e-06	0.999996
	0	43	1	2.73974	0.150047	-0.823774	149.251	2.17392	118.869	-3.52666	75.5358	6.20535e-06	0.999994	0.00269721	0.997303
	0	43	2	3.06762	0.24452	-0.611685	204.017	2.30967	170.314	1.19478	33.7023	4.65191e-06	0.999995	1.02452e-06	0.999999
	0	43	3	3.64557	0.394567	-0.403879	212.044	2.32643	155.699	2.62701	112.616	2.06007e-05	0.999979	0.000530015	0.99947
	0	43	4	5.61841	0.355666	-0.448958	229.657	2.36108	172.179	-6.67881	105.845	9.55488e-06	0.99999	1.03348e-05	0.99999
	0	43	5	6.81878	0.311208	-0.50695	247.726	2.39397	205.613	-0.713234	47.2726	4.00925e-06	0.999996	4.20573e-09	1
	0	43	6	8.25256	0.494598	-0.305748	232.783	2.36695	164.597	-2.11787	46.5519	3.28722e-05	0.999967	3.58488e-06	0.999996
	0	43	7	9.39736	0.922508	-0.0350298	220.707	2.34382	132.953	2.93862	113.66	0.000644727	0.999355	0.00895349	0.991047
	0	43	8	12.1538	0.994753	-0.00228481	201.227	2.30369	117.97	-7.33256	122.115	0.00129445	0.998706	0.0167186	0.983281
	0	43	9	14.1099	0.238963	-0.621669	209.145	2.32045	175.626	2.02278	58.0223	3.8002e-06	0.999996	1.09919e-06	0.999999
	0	43	10	17.0664	0.739118	-0.131286	181.785	2.25956	125.808	2.34786	54.0408	0.000499123	0.999501	0.000744015	0.999256
	0	43	11	18.7614	0.383452	-0.416289	142.651	2.15428	105.597	5.67203	31.965	0.000112706	0.999887	0.00438447	0.995616
	0	43	12	19.6283	0.261192	-0.58304	166.606	2.22169	117.147	-7.3838	89.5083	1.58964e-05	0.999984	0.00587545	0.994125
	0	43	13	24.4076	0.327879	-0.484286	179.063	2.25301	126.987	4.96195	41.8358	2.34371e-05	0.999977	0.000547961	0.999452
	0	43	14	33.9439	0.322322	-0.49171	163.015	2.21223	132.444	1.5261	31.3679	3.4492e-05	0.999966	0.000185058	0.999815
	0	43	15	38.8509	0.561285	-0.250816	168.759	2.22727	82.7117	7.23102	64.3299	0.000217756	0.999782	0.117608	0.882392
	0	43	16	42.2353	0.194505	-0.71107	210.307	2.32285	179.882	2.41304	28.3851	1.93989e-06	0.999998	2.00539e-07	1
	0	43	17	56.662	0.227848	-0.642354	194.902	2.28982	169.527	0.0507957	37.7817	4.70864e-06	0.999995	1.28946e-06	0.999999
	0	43	18	57.2678	0.200062	-0.698835	206.139	2.31416	186.647	-1.96466	32.3066	2.35226e-06	0.999998	8.10621e-08	1
	0	43	19	58.9183	0.216734	-0.664073	181.13	2.25799	167.677	-4.17246	39.0598	5.91502e-06	0.999994	2.39125e-06	0.999998
	0	44	1	0.216734	0.316765	-0.499263	178.196	2.2509	102.726	1.82735	129.532	2.13449e-05	0.999979	0.27674	0.72326
	0	44	2	1.97839	0.605743	-0.217711	188.63	2.27561	105.161	6.67602	121.939	0.000186741	0.999813	0.457672	0.542328
	0	44	3	5.14048	0.138932	-0.857198	243.717	2.38689	212.536	-3.11858	39.7445	3.174e-07	1	1.02432e-09	1
	0	44	4	5.60729	0.505712	-0.296096	240.65	2.38139	186.936	2.49539	73.4854	3.10786e-05	0.999969	4.38299e-07	1
	0	44	5	7.71906	0.300093	-0.522744	184.788	2.26667	118.379	12.9119	17.0975	1.4949e-05	0.999985	0.00239141	0.997609
	0	44	6	14.6934	0.200062	-0.698835	225.401	2.35296	186.94	-6.83339	58.3748	1.45437e-06	0.999999	2.13609e-07	1
	0	44	7	15.5826	0.238963	-0.621669	232.946	2.36726	152.181	-9.0941	86.0981	2.16802e-06	0.999998	9.88648e-05	0.999901
	0	44	8	16.3717	0.283421	-0.547568	212.278	2.32691	195.281	1.92027	24.1153	6.21853e-06	0.999994	1.33108e-08	1
	0	44	9	17.272	0.294536	-0.530862	204.481	2.31065	176.261	0.535335	44.68	8.54566e-06	0.999991	5.51414e-07	0.999999
	0	44	10	18.2112	0.233406	-0.631889	201.041	2.30329	184.022	0.0712154	27.2703	4.32458e-06	0.999996	1.00927e-07	1
	0	44	11	21.8179	0.266749	-0.573897	216.498	2.33545	175.934	0.103618	44.4505	4.58041e-06	0.999995	5.72924e-07	0.999999
	0	44	12	22.7348	0.338994	-0.469808	184.615	2.26627	154.015	-3.71463	65.3856	2.27441e-05	0.999977	2.80589e-05	0.999972
	0	44	13	24.8299	0.255635	-0.59238	196.43	2.29321	171.4	-5.67878	43.7657	6.51582e-06	0.999993	1.76198e-06	0.999998
	0	44	14	26.7916	0.327879	-0.484286	201.025	2.30325	167.94	-5.96798	77.0585	1.34842e-05	0.999987	6.15295e-06	0.999994
	0	44	15	30.3316	0.405681	-0.391815	171.805	2.23504	137.446	-3.40328	58.3605	5.96975e-05	0.99994	0.000204416	0.999796
	0	44	16	31.7043	0.255635	-0.59238	204.046	2.30973	159.599	3.66966	63.8022	5.37166e-06	0.999995	1.8348e-05	0.999982
	0	44	17	32.3934	0.261192	-0.58304	206.619	2.31517	168.394	-4.20786	75.4708	5.41042e-06	0.999995	5.05907e-06	0.999995
	0	44	18	42.7688	0.233406	-0.631889	236.292	2.37345	171.747	8.18949	72.9099	1.85935e-06	0.999998	1.64815e-05	0.999984
	0	44	19	49.3486	0.233406	-0.631889	192.681	2.28484	164.186	3.70008	46.2839	5.38492e-06	0.999995	4.40771e-06	0.999996
	10	45	1	0	0.611286	-0.213755	72.8886	1.86266	35.1468	0.834842	24.2044	0.00729673	0.992703	0.886013	0.113987
	10	45	2	1.00584	1.7505	0.243163	53.1535	1.72553	21.7237	-34.2479	232.971	0.420501	0.579499	0.999981	1.88733e-05
	10	45	3	3.02309	37.3885	1.57274	43.7669	1.64115	9.67137	-24.5249	195.628	1	7.71322e-08	0.998779	0.00122068
	10	45	4	42.2566	3.47322	0.540732	50.3932	1.70237	15.1567	-37.8335	265.491	0.935578	0.0644225	0.999998	1.7773e-06
	10	45	5	47.9248	4.41793	0.645219	69.6222	1.84275	17.6894	-30.9928	207.581	0.967213	0.0327869	0.999896	0.000104175
	10	45	6	55.6048	0.655744	-0.183266	64.295	1.80818	27.8464	-37.4749	299.003	0.0138863	0.986114	0.999999	6.60707e-07
	10	45	7	56.7051	2.80636	0.448143	60.546	1.78209	24.2856	-34.4726	229.782	0.80321	0.19679	0.999981	1.87044e-05
	10	46	1	2.36735	0.822458	-0.0848863	65.3759	1.81542	30.4408	-25.502	191.041	0.0266719	0.973328	0.998594	0.00140562
	10	46	2	4.72913	11.57	1.06333	40.2382	1.60464	13.8156	-29.05	228.05	0.999872	0.000127565	0.999857	0.000142728
	10	46	3	18.3441	1.61157	0.20725	70.8677	1.85045	34.3779	-30.6272	230.297	0.209383	0.790617	0.99989	0.000110381
	10	46	4	20.4559	6.72415	0.827637	43.0101	1.63357	14.5951	-26.7425	196.363	0.997617	0.00238277	0.999385	0.000615416
	10	46	5	27.8635	0.327872	-0.484296	155.074	2.19054	102.032	-2.93959	155.069	4.60728e-05	0.999954	0.462401	0.537599
	10	46	6	28.6415	0.555715	-0.255148	83.07	1.91944	30.5409	-21.9576	171.737	0.00338479	0.996615	0.994124	0.00587621
	10	46	7	44.9129	15.0821	1.17846	37.4901	1.57392	9.75324	-1.28106	212.659	0.999972	2.83035e-05	0.999849	0.000151381
	10	47	1	0.344543	0.338986	-0.469818	162.821	2.21171	121.716	-3.31068	81.4468	4.09839e-05	0.999959	0.00236693	0.997633
	10	47	2	4.45683	20.6781	1.31551	36.8664	1.56663	7.14378	-22.7476	196.857	0.999996	4.32825e-06	0.998104	0.00189602
	10	47	3	26.4187	0.589058	-0.229842	147.469	2.1687	90.686	3.85097	142.998	0.000454158	0.999546	0.842624	0.157376
	10	47	4	29.9586	30.0364	1.47765	40.073	1.60285	8.97455	-4.84904	210.281	1	3.74288e-07	0.999365	0.000635097
	10	48	1	0	1.01696	0.0073031	91.0311	1.95919	29.2856	-9.66566	212.097	0.0203785	0.979622	0.866901	0.133099
	10	48	2	2.37846	0.844687	-0.0733044	92.9117	1.96807	41.3644	-31.3482	306.757	0.00952696	0.990473	0.999998	2.10577e-06
	10	48	3	5.86835	0.2334	-0.631899	181.89	2.25981	148.396	-4.59514	82.9452	7.23795e-06	0.999993	0.000105514	0.999894
	10	48	4	8.14122	0.200057	-0.698845	201.503	2.30428	170.176	-5.92554	60.6884	2.65631e-06	0.999997	2.88282e-06	0.999997
	10	48	5	8.91367	36.4716	1.56195	35.3046	1.54783	6.39893	-14.0026	221.817	1	1.18458e-07	0.998687	0.0013135
	10	48	6	53.8932	0.422343	-0.374334	138.063	2.14008	57.7752	-8.02515	186.238	0.000179924	0.99982	0.979516	0.0204836
	1	49	1	0	0.133375	-0.874927	197.038	2.29455	183.157	-3.265	30.0414	9.76842e-07	0.999999	2.9887e-05	0.99997
	1	49	2	1.20593	0.627972	-0.202059	100.419	2.00182	44.6402	-4.18459	198.871	0.00251396	0.997486	0.997897	0.00210259
	1	49	3	2.87311	0.205619	-0.686936	229.744	2.36124	208.915	-3.89946	52.6947	1.43006e-06	0.999999	2.98404e-09	1
	1	49	4	8.31369	0.933623	-0.0298286	80.5915	1.90629	46.4959	-28.9332	201.845	0.0215902	0.97841	0.999423	0.000576622
	1	49	5	14.4267	0.577957	-0.238105	93.3739	1.97023	38.3332	-27.4386	215.308	0.00248632	0.997514	0.999464	0.000535844
	1	49	6	16.3829	0.75579	-0.121599	66.3624	1.82192	32.5906	-19.2152	214.769	0.0194234	0.980577	0.997635	0.00236544
	1	49	7	17.5999	2.17845	0.338148	36.47	1.56194	13.1827	-20.1188	167.958	0.779473	0.220527	0.992832	0.00716833
	1	49	8	22.1569	0.455697	-0.341324	72.1349	1.85815	30.446	-19.3001	215.509	0.00320364	0.996796	0.997833	0.00216663
	1	49	9	25.7913	0.238963	-0.621669	149.428	2.17443	130.377	-12.3099	128.827	2.09154e-05	0.999979	0.00765598	0.992344
	1	49	10	26.4082	0.766904	-0.115259	63.7236	1.8043	35.4232	-25.4558	183.344	0.0231233	0.976877	0.998133	0.00186738
	1	49	11	28.6867	18.0778	1.25715	62.8045	1.79799	10.5758	-34.7125	238.287	0.999992	8.22118e-06	0.999988	1.23858e-05
	1	49	12	48.7318	0.261192	-0.58304	155.912	2.19288	109.888	-18.6845	160.798	2.20341e-05	0.999978	0.331122	0.668878
	1	49	13	49.8599	0.266749	-0.573897	140.338	2.14718	72.4434	-20.6148	147.378	3.91082e-05	0.999961	0.917424	0.0825756
	1	49	14	50.5657	0.277864	-0.556168	174.257	2.24119	137.987	-16.2417	132.372	1.54775e-05	0.999985	0.0065066	0.993493
	1	49	15	51.1936	0.611301	-0.213745	72.6156	1.86103	31.0005	-15.0493	206.847	0.00739393	0.992606	0.995804	0.00419595
	1	49	16	52.3662	7.63014	0.882533	65.6382	1.81716	22.1741	-17.0908	244.151	0.998364	0.00163569	0.99967	0.000329513
	1	50	1	3.56222	1.04477	0.01902	60.3035	1.78034	24.1983	-5.29449	187.156	0.0729066	0.927093	0.995079	0.0049214
	1	50	2	7.11332	3.64002	0.561103	56.4383	1.75157	19.0527	-19.9578	209.896	0.938626	0.0613742	0.997767	0.00223284
	1	50	3	13.5375	0.150047	-0.823774	209.649	2.32149	168.098	-8.05623	87.8555	9.35359e-07	0.999999	9.86757e-06	0.99999
	1	50	4	15.3937	2.91757	0.465021	43.7052	1.64053	18.3492	-13.8557	157.068	0.893215	0.106785	0.968342	0.0316578
	1	50	5	20.9787	0.411239	-0.385906	95.0349	1.97788	39.6557	-18.1191	192.018	0.00079789	0.999202	0.990801	0.00919861
	1	50	6	31.3986	28.5978	1.45633	57.9672	1.76318	12.9331	-15.5718	147.017	1	3.83246e-07	0.971946	0.0280543
	1	51	1	0.439025	0.461254	-0.33606	247.271	2.39317	209.097	3.82196	53.4233	1.87751e-05	0.999981	4.23402e-09	1
	1	51	2	1.83946	0.950295	-0.0221417	75.2931	1.87676	36.9163	-21.1656	228.23	0.0282646	0.971735	0.998942	0.00105759
	1	51	3	6.9466	0.933623	-0.0298286	69.2885	1.84066	38.6553	-1.03811	191.51	0.0340442	0.965956	0.998681	0.00131873
	1	51	4	10.6589	1.36709	0.135797	86.3168	1.9361	40.7786	-0.0251127	168.227	0.0739805	0.926019	0.992419	0.0075807
	1	51	5	20.184	0.677988	-0.168778	75.7955	1.87964	46.8682	-18.742	138.863	0.008839	0.991161	0.959964	0.0400365
	1	51	6	21.6512	0.627972	-0.202059	65.4595	1.81597	46.5489	-13.4748	89.2522	0.0114809	0.988519	0.831192	0.168808
	1	51	7	22.5792	2.65082	0.423381	56.1249	1.74916	24.9204	-12.4508	229.634	0.783957	0.216043	0.999347	0.000653071
	1	51	8	27.5419	0.522384	-0.28201	82.8566	1.91833	52.5861	-9.67677	158.741	0.00282075	0.997179	0.906237	0.0937628
	1	51	9	30.6595	0.611301	-0.213745	80.0782	1.90351	35.1808	-9.68245	158.975	0.00522993	0.99477	0.947409	0.0525909
	1	51	10	32.2822	0.627972	-0.202059	66.8503	1.8251	39.0559	-20.8182	143.034	0.0106869	0.989313	0.985119	0.0148814
	1	51	11	33.327	0.255635	-0.59238	155.576	2.19194	107.661	-6.54151	76.4408	2.08772e-05	0.999979	0.010756	0.989244
	1	51	12	36.4057	2.47855	0.394197	62.0392	1.79267	19.3983	-22.8974	163.903	0.690867	0.309133	0.996363	0.00363721
	1	51	13	39.9402	1.0281	0.0120339	68.2696	1.83423	29.1183	-1.19109	87.9797	0.0493166	0.950683	0.66347	0.33653
	1	51	14	41.1516	0.483483	-0.315619	111.396	2.04687	57.2307	-19.2509	255.14	0.000693815	0.999306	0.999692	0.000307502
	1	51	15	44.825	0.577957	-0.238105	91.0923	1.95948	48.4877	-13.3511	177.448	0.00272648	0.997274	0.966637	0.0333628
	1	51	16	45.8309	0.24452	-0.611685	191.643	2.28249	138.422	-10.3086	80.7294	6.40696e-06	0.999994	0.000647352	0.999353
	1	51	17	54.5447	1.32263	0.121439	62.6942	1.79723	23.3337	-32.6323	215.818	0.142522	0.857478	0.999949	5.094e-05
	1	51	18	57.1233	0.272307	-0.564942	155.06	2.1905	76.2199	-26.7291	178.234	2.56784e-05	0.999974	0.990816	0.00918396
	1	51	19	58.1291	0.577957	-0.238105	118.091	2.07222	37.9313	-26.6572	235.42	0.00101631	0.998984	0.999685	0.000314739
	1	51	20	59.763	0.233406	-0.631889	127.223	2.10457	67.473	-23.6331	208.515	4.3336e-05	0.999957	0.994152	0.00584811
	1	52	1	0	0.944737	-0.0246889	212.621	2.32761	94.9589	6.55342	142.955	0.000829475	0.999171	0.389868	0.610132
	1	52	2	2.3285	0.955852	-0.0196094	196.418	2.29318	45.7219	4.33479	293.241	0.00117337	0.998827	1	8.19012e-11
	1	52	3	4.0068	0.116703	-0.932919	274.687	2.43884	253.566	-6.81283	89.5734	9.55416e-08	1	2.05583e-12	1
	1	52	4	4.67367	0.205619	-0.686936	240.416	2.38096	110.7	-17.8603	168.26	1.11884e-06	0.999999	0.346057	0.653943
	1	52	5	6.9077	0.416796	-0.380077	248.191	2.39479	204.122	0.801858	77.0474	1.22318e-05	0.999988	2.40221e-08	1
	1	52	6	9.33067	0.639087	-0.19444	57.1214	1.7568	15.7292	-13.9589	202.442	0.0190454	0.980955	0.995588	0.00441187
	1	52	7	14.2266	0.439025	-0.357511	78.5447	1.89512	21.9192	-33.1668	237.125	0.00207466	0.997925	0.999972	2.77396e-05
	1	52	8	17.4776	0.288978	-0.539134	132.271	2.12146	72.287	-23.9944	168.363	6.55408e-05	0.999934	0.978244	0.0217564
	1	52	9	18.4891	11.3313	1.05428	63.8011	1.80483	13.6688	-17.4631	146.747	0.999843	0.000157467	0.981141	0.0188586
	1	52	10	30.6539	0.411239	-0.385906	114.004	2.05692	82.0847	-11.7897	154.303	0.000373518	0.999626	0.612925	0.387075
	1	52	11	34.2606	1.48379	0.171373	73.3814	1.86559	26.5787	-22.9416	225.142	0.147454	0.852546	0.99919	0.000809773
	1	52	12	36.3446	9.01946	0.955181	68.228	1.83396	16.7802	-21.9368	167.868	0.999362	0.000638113	0.995447	0.00455277
	1	52	13	45.8309	1.60605	0.20576	96.8949	1.9863	23.3781	-17.955	180.913	0.10425	0.89575	0.990382	0.00961814
	1	52	14	49.3931	0.472369	-0.325719	89.5157	1.9519	66.0614	-29.664	189.571	0.00153976	0.99846	0.998696	0.00130407
	1	52	15	53.6111	1.94505	0.28893	58.0048	1.76346	28.3459	-32.4945	259.018	0.477237	0.522763	0.99998	1.99314e-05
	1	52	16	57.2455	0.294536	-0.530862	171.469	2.23419	74.3703	-18.4003	169.11	2.01957e-05	0.99998	0.905267	0.0947327
	0.3	53	1	0	0.211172	-0.675364	215.543	2.33353	159.307	6.76819	42.6098	2.18923e-06	0.999998	0.000675559	0.999324
	0.3	53	2	1.53933	0.227843	-0.642364	198.034	2.29674	175.537	-3.30183	51.5641	4.33464e-06	0.999996	8.13909e-07	0.999999
	0.3	53	3	2.32845	0.344543	-0.462756	187.203	2.27231	140.008	0.747221	59.2594	2.25378e-05	0.999977	0.00014759	0.999852
	0.3	53	4	3.70662	0.222286	-0.653088	233.218	2.36776	171.699	3.4739	159.378	1.69615e-06	0.999998	0.00722506	0.992775
	0.3	53	5	5.13481	0.366772	-0.435604	225.722	2.35357	167.239	-8.15899	145.374	1.16514e-05	0.999988	0.000184023	0.999816
	0.3	53	6	5.97949	0.294529	-0.530872	190.339	2.27953	141.662	-24.9395	190.834	1.21545e-05	0.999988	0.1887	0.8113
	0.3	53	7	7.20206	0.255629	-0.59239	187.518	2.27304	81.8783	-7.09228	161.214	8.2372e-06	0.999992	0.736819	0.263181
	0.3	53	8	7.65219	0.727986	-0.137877	183.976	2.26476	104.119	-0.16384	205.305	0.000446398	0.999554	0.995738	0.00426235
	0.3	53	9	8.99702	0.211172	-0.675364	220.479	2.34337	176.002	-1.98264	119.817	1.94031e-06	0.999998	2.05864e-05	0.999979
	0.3	53	10	9.88061	0.316757	-0.499273	191.271	2.28165	154.393	-3.24717	75.0347	1.51949e-05	0.999985	3.5579e-05	0.999964
	0.3	53	11	11.7367	0.2334	-0.631899	228.706	2.35928	134.778	-18.6643	155.582	2.20762e-06	0.999998	0.0312185	0.968781
	0.3	53	12	12.1535	0.222286	-0.653088	213.287	2.32896	183.929	-5.6157	99.9456	2.72099e-06	0.999997	1.34197e-06	0.999999
	0.3	53	13	12.5925	0.277857	-0.556178	182.81	2.262	164.702	2.2352	53.8465	1.22272e-05	0.999988	4.78906e-06	0.999995
	0.3	53	14	13.4372	0.200057	-0.698845	183.285	2.26313	128.803	4.1289	138.283	4.39465e-06	0.999996	0.135561	0.864439
	0.3	53	15	13.8762	0.3501	-0.455807	180.77	2.25713	132.937	11.3929	45.4689	2.80883e-05	0.999972	0.00120321	0.998797
	0.3	53	16	14.8209	0.277857	-0.556178	205.077	2.31192	166.589	-5.9883	83.1505	6.90857e-06	0.999993	9.13534e-06	0.999991
	0.3	53	17	15.4711	0.794672	-0.099812	199.214	2.29932	77.1085	9.09029	134.556	0.000480523	0.999519	0.981302	0.0186976
	0.3	53	18	16.9048	0.227843	-0.642364	228.343	2.35859	162.792	-0.408564	91.2409	2.05663e-06	0.999998	2.7881e-05	0.999972
	0.3	53	19	18.3719	0.211172	-0.675364	217.585	2.33763	196.763	-0.621983	30.0703	2.08197e-06	0.999998	1.2458e-08	1
	0.3	53	20	18.9999	0.355658	-0.448968	172.81	2.23757	132.863	-6.74973	103.582	3.65866e-05	0.999963	0.00157208	0.998428
	0.3	53	21	23.5901	0.366772	-0.435604	182.22	2.2606	107.366	-5.59246	143.559	3.18649e-05	0.999968	0.138389	0.861611
	0.3	53	22	24.6682	0.494586	-0.305758	198.453	2.29766	145.379	-10.1792	80.9221	6.64958e-05	0.999934	0.0002604	0.99974
	0.3	53	23	27.758	0.222286	-0.653088	178.486	2.2516	130.515	-5.82808	116.906	6.88231e-06	0.999993	0.00367631	0.996324
	0.3	53	24	28.4748	0.316757	-0.499273	123.222	2.09069	79.0144	-4.08554	105.992	0.000119302	0.999881	0.201215	0.798785
	0.3	53	25	31.8647	0.355658	-0.448968	190.538	2.27998	125.099	0.425595	83.8161	2.31996e-05	0.999977	0.00219729	0.997803
	0.3	53	26	35.488	0.372329	-0.429073	175.509	2.2443	96.253	-6.54076	126.173	3.9955e-05	0.99996	0.129418	0.870582
	0.3	53	27	36.6272	0.222286	-0.653088	213.567	2.32953	175.222	2.4154	55.9275	2.70222e-06	0.999997	1.11064e-06	0.999999
	0.3	53	28	41.3341	0.833572	-0.0790567	134.782	2.12963	62.9404	0.84808	127.11	0.00251778	0.997482	0.780973	0.219027
	0.3	53	29	44.7739	0.305643	-0.514785	206.483	2.31488	148.885	-0.613103	79.5278	9.2568e-06	0.999991	9.73441e-05	0.999903
	0.3	53	30	47.9248	0.572386	-0.242311	72.8347	1.86234	42.6116	-15.3807	229.585	0.00598533	0.994015	0.998809	0.00119071
	0.3	53	31	49.6365	0.411229	-0.385916	126.583	2.10237	78.6562	-23.4122	158.355	0.00023917	0.999761	0.954365	0.0456348
	0.3	53	32	53.8766	0.327872	-0.484296	159.582	2.20298	121.092	1.04162	51.4395	4.03084e-05	0.99996	0.00109481	0.998905
	0.3	53	33	54.8824	0.744658	-0.128043	79.1188	1.89828	32.5527	-16.6452	176.462	0.0104216	0.989578	0.983499	0.016501
	0.3	53	34	56.7329	0.500143	-0.300905	126.407	2.10177	69.7069	-3.44409	121.755	0.000465905	0.999534	0.484702	0.515298
	0.3	53	35	57.6165	0.300086	-0.522754	163.684	2.21401	133.34	9.096	29.5944	2.68184e-05	0.999973	0.000305749	0.999694
	0.3	53	36	59.2059	0.577943	-0.238115	123.639	2.09215	75.3804	-7.12599	119.889	0.00084973	0.99915	0.346988	0.653012
	0.3	54	1	0.322315	0.3112	-0.50696	211.113	2.32451	179.704	-1.80325	52.66	8.84406e-06	0.999991	4.07844e-07	1
	0.3	54	2	1.53933	0.1945	-0.71108	203.84	2.30929	194.422	2.54134	20.871	2.2952e-06	0.999998	1.43057e-08	1
	0.3	54	3	2.08393	0.227843	-0.642364	226.63	2.35532	189.922	-2.65019	64.6884	2.13996e-06	0.999998	1.16913e-07	1
	0.3	54	4	2.73967	0.828015	-0.0819617	235.628	2.37223	145.098	-2.93624	103.469	0.000301622	0.999698	0.000410736	0.999589
	0.3	54	5	5.70163	0.227843	-0.642364	218.912	2.34027	90.522	18.385	91.6601	2.56814e-06	0.999997	0.982053	0.017947
	0.3	54	6	7.50215	0.327872	-0.484296	224.212	2.35066	151.005	-13.9978	125.059	7.94341e-06	0.999992	0.000705193	0.999295
	0.3	54	7	8.73584	0.294529	-0.530872	226.999	2.35602	169.097	-0.794787	96.9926	5.08427e-06	0.999995	1.52095e-05	0.999985
	0.3	54	8	10.353	0.294529	-0.530872	204.217	2.31009	174.967	-4.94401	72.0882	8.59968e-06	0.999991	1.72883e-06	0.999998
	0.3	54	9	11.7923	0.244515	-0.611695	180.528	2.25654	145.763	-0.398051	48.9072	8.67766e-06	0.999991	5.04099e-05	0.99995
	0.3	54	10	12.6425	0.200057	-0.698845	195.557	2.29127	134.104	-1.99003	61.5923	3.11638e-06	0.999997	0.000313414	0.999687
	0.3	54	11	13.6539	0.238957	-0.62168	218.01	2.33848	169.03	-2.78973	71.3077	3.06375e-06	0.999997	3.92233e-06	0.999996
	0.3	54	12	14.3486	0.344543	-0.462756	187.311	2.27256	152.72	-0.413429	65.0973	2.24765e-05	0.999978	3.30384e-05	0.999967
	0.3	54	13	27.7857	0.316757	-0.499273	189.802	2.2783	125.759	-7.73748	86.6393	1.57699e-05	0.999984	0.00223023	0.99777
	0.3	54	14	28.3859	0.300086	-0.522754	181.488	2.25885	125.273	-5.40087	103.483	1.63136e-05	0.999984	0.00359958	0.9964
	0.3	54	15	29.5918	0.211172	-0.675364	195.33	2.29077	178.549	0.341812	19.2528	3.68736e-06	0.999996	2.1263e-07	1
	0.3	54	16	39.289	0.3112	-0.50696	180.683	2.25692	159.052	0.165021	45.2902	1.88194e-05	0.999981	7.36195e-06	0.999993
	0.3	54	17	39.8614	0.205614	-0.686946	203.704	2.309	170.119	-3.87086	46.2538	2.72333e-06	0.999997	1.76891e-06	0.999998
	0.3	54	18	40.3782	0.238957	-0.62168	211.198	2.32469	167.08	-3.99573	97.1599	3.61246e-06	0.999996	1.51966e-05	0.999985
	0.3	54	19	40.9006	0.222286	-0.653088	200.037	2.30111	184.462	-2.84265	35.8192	3.80884e-06	0.999996	1.34266e-07	1
	0.3	54	20	41.7008	0.238957	-0.62168	233.228	2.36778	217.184	-2.34441	35.94	2.15417e-06	0.999998	3.64985e-10	1
	0.3	54	21	44.635	0.316757	-0.499273	185.994	2.2695	161.253	-1.81072	52.8222	1.73845e-05	0.999983	6.73278e-06	0.999993
	0.3	54	22	45.2074	0.266743	-0.573907	203.058	2.30762	162.394	-3.11082	45.7863	6.33409e-06	0.999994	5.22922e-06	0.999995
	0.3	54	23	54.6101	0.255629	-0.59239	201.497	2.30427	165.113	-4.63794	65.5337	5.7257e-06	0.999994	6.14277e-06	0.999994
	0.3	54	24	56.2217	0.244515	-0.611695	171.231	2.23358	126.13	-7.79782	66.9755	1.13302e-05	0.999989	0.00153634	0.998464
	0.3	54	25	57.1608	0.322315	-0.49172	190.329	2.27951	137.894	-3.22353	64.501	1.65201e-05	0.999983	0.000220633	0.999779
	0.3	54	26	57.9722	0.333429	-0.476997	178.354	2.25128	150.048	-5.07998	49.2447	2.52877e-05	0.999975	3.96422e-05	0.99996
	0.3	54	27	58.7057	0.327872	-0.484296	188.046	2.27426	142.376	3.7976	57.3324	1.85661e-05	0.999981	0.00013461	0.999865
	0.3	54	28	59.3948	0.266743	-0.573907	202.704	2.30686	185.858	-1.96372	43.9483	6.39e-06	0.999994	1.18788e-07	1
	0.3	55	1	1.90054	0.255629	-0.59239	209.699	2.3216	179.169	9.40946	24.6538	4.67302e-06	0.999995	4.39239e-07	1
	0.3	55	2	2.53962	0.288972	-0.539145	226.841	2.35572	194.877	-3.28263	103.043	4.77019e-06	0.999995	3.19531e-07	1
	0.3	55	3	3.22315	0.177829	-0.749998	212.909	2.32819	185.884	-3.97802	66.5617	1.38934e-06	0.999999	2.47612e-07	1
	0.3	55	4	5.51825	0.1167	-0.932929	236.511	2.37385	213.611	-2.24051	78.7223	2.36517e-07	1	3.59759e-09	1
	0.3	55	5	7.26319	0.583501	-0.233959	239.611	2.37951	163.346	-11.2825	99.7496	5.82052e-05	0.999942	4.07573e-05	0.999959
	0.3	55	6	9.06371	0.489029	-0.310665	228.868	2.35959	132.459	19.8894	29.9839	3.38483e-05	0.999966	0.0131426	0.986857
	0.3	55	7	9.98064	0.500143	-0.300905	240.023	2.38025	113.484	-8.29979	199.952	3.00235e-05	0.99997	0.81931	0.18069
	0.3	55	8	10.9865	0.1556	-0.80799	210.443	2.32314	111.535	-20.7078	146.911	1.01215e-06	0.999999	0.322384	0.677616
	0.3	55	9	12.0146	0.133372	-0.874937	199.187	2.29926	116.903	-11.8078	109.136	9.17613e-07	0.999999	0.016599	0.983401
	0.3	55	10	12.8148	0.250072	-0.601935	223.806	2.34987	202.451	-0.201272	34.0006	3.1089e-06	0.999997	4.92132e-09	1
	0.3	55	11	13.8762	0.122257	-0.912725	285.418	2.45548	269.244	-4.22474	40.2917	8.61856e-08	1	7.14486e-15	1
	0.3	55	12	15.8657	0.183386	-0.736634	194.089	2.288	132.066	-6.36969	76.7521	2.51694e-06	0.999997	0.000746498	0.999254
	0.3	55	13	17.844	0.839129	-0.076171	203.328	2.3082	130.834	-0.521889	107.167	0.000567449	0.999433	0.00352141	0.996479
	0.3	55	14	20.0557	0.266743	-0.573907	184.923	2.26699	168.579	-4.92364	52.3355	1.01223e-05	0.99999	2.79064e-06	0.999997
	0.3	55	15	22.8955	0.3112	-0.50696	196.706	2.29382	153.567	-10.2051	79.3201	1.24846e-05	0.999988	8.50354e-05	0.999915
	0.3	55	16	25.0072	0.372329	-0.429073	187.355	2.27267	110.919	-2.33031	86.2083	2.9556e-05	0.99997	0.00859245	0.991408
	0.3	55	17	26.2131	0.177829	-0.749998	151.71	2.18101	104.207	-11.5643	111.728	8.65346e-06	0.999991	0.0567749	0.943225
	0.3	55	18	26.7632	0.211172	-0.675364	213.213	2.32881	165.499	9.24112	17.3852	2.31961e-06	0.999998	2.5542e-06	0.999997
	0.3	55	19	27.3301	0.361215	-0.442235	195.877	2.29198	174.182	-1.3818	40.8001	2.15396e-05	0.999978	7.04333e-07	0.999999
	0.3	55	20	28.5526	0.200057	-0.698845	183.674	2.26405	158.326	3.10786	20.6098	4.34557e-06	0.999996	4.60985e-06	0.999995
	0.3	55	21	29.2084	0.377886	-0.422639	184.856	2.26683	163.098	-2.83036	46.2729	3.31654e-05	0.999967	4.65409e-06	0.999995
	0.3	55	22	30.0253	0.789115	-0.10286	187.726	2.27352	127.228	-3.75726	92.2575	0.000585488	0.999415	0.0019011	0.998099
	0.3	55	23	31.3923	0.200057	-0.698845	179.414	2.25386	149.487	-2.49184	24.4008	4.91864e-06	0.999995	2.44224e-05	0.999976
	0.3	55	24	31.8647	0.344543	-0.462756	196.085	2.29245	157.884	0.728453	43.4865	1.8099e-05	0.999982	8.31147e-06	0.999992
	0.3	55	25	33.2984	0.344543	-0.462756	179.57	2.25423	149.417	-0.672049	49.6684	2.7414e-05	0.999973	3.16536e-05	0.999968
	0.3	55	26	37.2829	0.3501	-0.455807	154.011	2.18755	99.4967	-10.9937	100.226	5.89787e-05	0.999941	0.0627478	0.937252
	0.3	55	27	38.0387	0.238957	-0.62168	208.153	2.31838	155.274	0.411031	49.459	3.89448e-06	0.999996	1.41787e-05	0.999986
	0.3	55	28	40.3338	0.183386	-0.736634	231.696	2.36492	203.536	-3.40968	47.7572	9.56164e-07	0.999999	6.70225e-09	1
	0.3	55	29	41.1618	0.372329	-0.429073	188.336	2.27493	163.413	-1.2065	63.7677	2.88488e-05	0.999971	6.9232e-06	0.999993
	0.3	55	30	44.6239	0.366772	-0.435604	169.016	2.22793	135.781	3.29247	61.9735	4.50784e-05	0.999955	0.000345475	0.999655
	0.3	55	31	45.2741	0.361215	-0.442235	174.518	2.24184	150.071	-5.371	48.2696	3.68877e-05	0.999963	4.06789e-05	0.999959
	0.3	55	32	49.7532	0.811344	-0.0907951	177.461	2.2491	70.8213	-3.48138	122.278	0.00081863	0.999181	0.473514	0.526486
	0.3	55	33	52.2039	0.111143	-0.954118	219.382	2.3412	207.017	1.39454	7.73498	3.2856e-07	1	1.13464e-09	1
	0.3	55	34	58.5668	0.400115	-0.397815	163.782	2.21427	134.742	1.07848	45.7707	7.04321e-05	0.99993	0.000190958	0.999809
	0.3	56	1	1.17812	0.283415	-0.547578	176.685	2.2472	118.245	-4.91879	91.0848	1.5413e-05	0.999985	0.0047793	0.995221
	0.3	56	2	1.80607	0.422343	-0.374334	189.074	2.27663	118.776	-10.9013	119.902	4.49529e-05	0.999955	0.0165989	0.983401
	0.3	56	3	5.52936	0.227843	-0.642364	233.452	2.3682	206.46	-4.47448	75.3749	1.82964e-06	0.999998	1.04901e-08	1
	0.3	56	4	8.95257	0.1556	-0.80799	237.148	2.37502	211.476	-3.23055	68.5644	5.14023e-07	0.999999	3.20431e-09	1
	0.3	56	5	10.2307	0.261186	-0.58305	231.178	2.36395	169.621	11.1504	42.1457	3.04875e-06	0.999997	7.40204e-06	0.999993
	0.3	56	6	11.2143	0.261186	-0.58305	219.305	2.34105	185.33	-3.15619	88.7251	3.99456e-06	0.999996	6.81664e-07	0.999999
	0.3	56	7	11.7756	0.4279	-0.368657	159.982	2.20407	102.527	-14.3088	170.525	9.91468e-05	0.999901	0.4572	0.5428
	0.3	56	8	12.5147	0.3501	-0.455807	181.375	2.25858	90.6925	9.45471	119.252	2.76532e-05	0.999972	0.865189	0.134811
	0.3	56	9	13.1204	0.255629	-0.59239	214.392	2.33121	201.008	3.23489	26.4642	4.17313e-06	0.999996	5.38721e-09	1
	0.3	56	10	15.4044	0.105586	-0.976394	141.718	2.15143	104.337	7.29491	82.7665	3.8881e-06	0.999996	0.0588819	0.941118
	0.3	56	11	25.7574	0.327872	-0.484296	174.584	2.24201	119.659	-9.80214	78.14	2.64221e-05	0.999974	0.00516818	0.994832
	0.3	56	12	28.3526	0.266743	-0.573907	192.419	2.28425	147.669	3.0908	40.0286	8.30012e-06	0.999992	3.35321e-05	0.999966
	0.3	56	13	33.0984	0.355658	-0.448968	150.112	2.17642	99.9487	-5.91253	82.4644	6.98481e-05	0.99993	0.0235048	0.976495
	0.3	56	14	33.9319	0.277857	-0.556178	205.382	2.31256	153.283	4.65215	18.5981	6.85736e-06	0.999993	9.47152e-06	0.999991
	0.3	56	15	37.7886	0.316757	-0.499273	184.354	2.26565	157.561	-5.39617	45.1556	1.81394e-05	0.999982	1.37077e-05	0.999986
	0.3	56	16	40.7228	0.355658	-0.448968	171.347	2.23388	148.139	1.60768	45.8386	3.80568e-05	0.999962	3.48517e-05	0.999965
	0.3	56	17	42.9234	0.305643	-0.514785	195.693	2.29158	173.224	1.75886	24.0471	1.20338e-05	0.999988	5.19004e-07	0.999999
	0.3	56	18	46.9301	0.250072	-0.601935	206.938	2.31584	173.101	-6.55159	63.2972	4.65208e-06	0.999995	2.0927e-06	0.999998
	0.3	56	19	47.4692	0.244515	-0.611695	186.095	2.26974	171.588	1.02872	11.7407	7.43921e-06	0.999993	5.64957e-07	0.999999
	0.3	56	20	50.5256	0.583501	-0.233959	193.484	2.28665	71.6033	3.96097	115.909	0.000144136	0.999856	0.698919	0.301081
	0.3	56	21	53.1597	0.405672	-0.391825	142.214	2.15294	106.421	-1.61712	47.3796	0.000138007	0.999862	0.00502733	0.994973
	0.3	56	22	54.1155	0.2723	-0.564952	224.377	2.35098	208.605	1.6839	8.65049	4.09839e-06	0.999996	8.43918e-10	1
	0.3	56	23	57.0108	0.305643	-0.514785	186.058	2.26965	131.724	0.523785	56.8597	1.5378e-05	0.999985	0.000371101	0.999629
	0.3	56	24	58.0389	0.211172	-0.675364	207.721	2.31748	179.248	4.59186	23.4985	2.66432e-06	0.999997	2.13674e-07	1
	2	57	1	0.36678	0.411239	-0.385906	154.822	2.18983	108.583	-9.17075	80.2038	9.95654e-05	0.9999	0.0150485	0.984951
	2	57	2	1.08923	0.516827	-0.286655	106.166	2.02599	45.4858	-18.2772	174.436	0.00104863	0.998951	0.979177	0.0208233
	2	57	3	4.58475	0.300093	-0.522744	211.115	2.32452	168.844	-16.7969	147.785	7.78636e-06	0.999992	0.000230595	0.999769
	2	57	4	6.9077	0.69466	-0.158228	66.6047	1.8235	36.9578	-8.06241	216.312	0.0147319	0.985268	0.998964	0.00103622
	2	57	5	8.67491	0.75579	-0.121599	84.4439	1.92657	29.2704	-31.2255	281.627	0.00881216	0.991188	0.99999	9.53132e-06
	2	57	6	10.7311	1.02254	0.00967998	75.183	1.87612	35.6689	-14.9369	260.42	0.0367756	0.963224	0.999926	7.39296e-05
	2	57	7	12.6706	1.12257	0.0502135	65.4608	1.81598	28.9882	-20.867	168.237	0.0744782	0.925522	0.991905	0.00809504
	2	57	8	14.7323	0.87805	-0.0564808	59.7308	1.7762	32.7814	-18.3835	137.722	0.043005	0.956995	0.974123	0.025877
	2	57	9	16.0994	1.33375	0.125073	60.038	1.77843	29.0528	-17.4739	136.523	0.161055	0.838945	0.97026	0.0297398
	2	57	10	18.2223	12.7817	1.10659	50.8558	1.70634	9.19584	-15.1129	144.667	0.999927	7.26979e-05	0.969801	0.030199
	2	57	11	31.8877	0.283421	-0.547568	187.306	2.27255	124.094	-13.999	216.127	1.15742e-05	0.999988	0.750814	0.249186
	2	57	12	32.5712	0.839149	-0.0761609	119.47	2.07726	71.8087	-23.1043	204.516	0.00395645	0.996044	0.990332	0.00966795
	2	57	13	33.6882	0.322322	-0.49171	135.525	2.13202	60.8222	-38.5908	265.15	8.13876e-05	0.999919	0.999996	3.99692e-06
	2	57	14	36.6725	0.266749	-0.573897	203.286	2.30811	127.36	-13.1256	151.329	6.29874e-06	0.999994	0.0288638	0.971136
	2	57	15	42.8522	0.238963	-0.621669	192.379	2.28416	159.618	-8.07947	82.4631	5.84343e-06	0.999994	2.86593e-05	0.999971
	2	57	16	43.369	12.3094	1.09024	55.3405	1.74304	15.37	-26.5983	195.441	0.999908	9.20432e-05	0.999336	0.00066356
	2	57	17	56.1341	0.338994	-0.469808	206.896	2.31575	91.029	-2.98477	156.675	1.32216e-05	0.999987	0.685529	0.314471
	2	57	18	59.6685	0.322322	-0.49171	105.629	2.02379	36.0869	-18.5728	242.913	0.000250825	0.999749	0.99955	0.000450315
	2	58	1	0	0.0500155	-1.3009	243.492	2.38648	235	-2.39002	19.0754	3.13563e-08	1	1.22465e-09	1
	2	58	2	1.72276	0.261192	-0.58304	185.588	2.26855	119.597	-4.33811	124.257	9.29373e-06	0.999991	0.01847	0.98153
	2	58	3	2.80087	0.361223	-0.442224	113.151	2.05366	48.5947	-29.1343	242.554	0.000258437	0.999742	0.999828	0.000171515
	2	58	4	3.99013	0.550171	-0.259503	69.0831	1.83937	33.9511	-37.0198	255.834	0.0064328	0.993567	0.999996	4.30527e-06
	2	58	5	7.80798	0.294536	-0.530862	164.736	2.21679	99.15	-7.03256	157.991	2.44968e-05	0.999976	0.402088	0.597912
	2	58	6	8.48041	0.177833	-0.749988	224.378	2.35098	162.106	-20.1145	162.597	1.04027e-06	0.999999	0.00192528	0.998075
	2	58	7	8.9361	0.63353	-0.198233	85.2559	1.93072	45.0348	6.16269	151.346	0.00469455	0.995305	0.996239	0.00376094
	2	58	8	9.91418	0.989196	-0.00471784	73.665	1.86726	39.1353	-13.0903	140.529	0.0347134	0.965287	0.910134	0.0898655
	2	58	9	11.2201	0.850264	-0.0704464	82.1326	1.91452	44.8851	-20.9667	281.476	0.0145781	0.985422	0.999974	2.5543e-05
	2	58	10	13.971	0.266749	-0.573897	189.98	2.27871	117.138	-2.64857	135.639	8.84768e-06	0.999991	0.0572939	0.942706
	2	58	11	14.5045	0.722446	-0.141194	64.687	1.81082	31.9863	-9.42697	186.889	0.0183003	0.9817	0.989223	0.0107772
	2	58	12	18.1334	0.266749	-0.573897	208.193	2.31847	165.697	-3.57257	49.5317	5.5843e-06	0.999994	3.58003e-06	0.999996
	2	58	13	23.8185	0.30565	-0.514775	173.971	2.24048	155.302	-0.198995	26.2124	2.12599e-05	0.999979	8.61488e-06	0.999991
	2	58	14	24.9855	0.405681	-0.391815	196.439	2.29323	80.9168	-8.08499	100.849	3.25262e-05	0.999967	0.176725	0.823275
	2	58	15	25.6857	0.238963	-0.621669	213.549	2.3295	179.061	-1.9446	64.2958	3.41127e-06	0.999997	6.64791e-07	0.999999
	2	58	16	26.2859	0.24452	-0.611685	152.055	2.182	75.3415	-7.79715	166.633	2.05023e-05	0.999979	0.84508	0.15492
	2	58	17	29.0757	0.261192	-0.58304	184.239	2.26538	147.222	4.00363	38.7248	9.6395e-06	0.99999	3.64997e-05	0.999964
	2	58	18	29.7426	0.294536	-0.530862	171.212	2.23354	130.778	-5.17678	47.1746	2.03427e-05	0.99998	0.000483731	0.999516
	2	58	19	31.8265	0.42791	-0.368647	147.393	2.16848	85.0997	-8.79154	122.423	0.000141815	0.999858	0.236799	0.763201
	2	58	20	32.8102	27.1806	1.43426	49.1401	1.69144	7.18709	-12.6431	226.076	0.999999	6.11676e-07	0.999145	0.000854758
	2	59	1	0.672431	0.316765	-0.499263	173.158	2.23844	134.983	2.04907	68.3843	2.44733e-05	0.999976	0.000431011	0.999569
	2	59	2	2.18957	0.283421	-0.547568	153.988	2.18749	118.136	-6.61105	54.9663	3.00224e-05	0.99997	0.0028269	0.997173
	2	59	3	3.08429	0.822477	-0.0848761	89.6643	1.95262	30.9681	-2.52667	160.752	0.00972555	0.990274	0.98007	0.0199299
	2	59	4	5.35166	0.672431	-0.172352	62.5969	1.79655	29.4503	-5.2139	208.547	0.0163625	0.983637	0.999111	0.000888992
	2	59	5	6.3353	0.194505	-0.71107	213.36	2.32911	175.119	-7.49965	114.469	1.7946e-06	0.999998	1.01985e-05	0.99999
	2	59	6	7.33005	0.300093	-0.522744	183.451	2.26352	56.6415	4.16763	174.784	1.54856e-05	0.999985	0.998609	0.00139079
	2	59	7	9.81971	0.222291	-0.653078	234.657	2.37043	190.325	7.45372	5.70716	1.64167e-06	0.999998	2.51552e-08	1
	2	59	8	11.1479	0.200062	-0.698835	232.106	2.36569	208.541	-2.77039	47.7253	1.24081e-06	0.999999	2.60392e-09	1
	2	59	9	14.9102	0.266749	-0.573897	203.136	2.30779	174.591	-1.6658	58.1964	6.32228e-06	0.999994	1.07846e-06	0.999999
	2	59	10	19.1726	0.250078	-0.601925	192.292	2.28396	163.263	-3.13376	85.8205	6.76361e-06	0.999993	1.60002e-05	0.999984
	2	59	11	23.3406	0.272307	-0.564942	198.688	2.29817	168.546	-8.41788	78.8955	7.56581e-06	0.999992	7.49525e-06	0.999993
	2	59	12	26.3915	0.338994	-0.469808	172.887	2.23776	130.085	-5.65854	74.2589	3.09761e-05	0.999969	0.000836293	0.999164
	2	59	13	27.2918	0.255635	-0.59238	167.813	2.22483	140.11	-6.12751	72.0587	1.43558e-05	0.999986	0.000245432	0.999755
	2	59	14	35.5833	0.444582	-0.352048	179.766	2.25471	122.238	-4.51801	101.128	6.81976e-05	0.999932	0.00457733	0.995423
	2	59	15	38.4953	0.227848	-0.642354	164.714	2.21673	144.087	-0.92068	30.9127	1.1167e-05	0.999989	4.58011e-05	0.999954
	2	59	16	39.6512	0.338994	-0.469808	157.734	2.19793	111.666	-8.36318	90.5015	4.74904e-05	0.999953	0.0116675	0.988333
	2	59	17	40.9294	0.461254	-0.33606	150.51	2.17757	73.1182	-11.1142	144.581	0.000168881	0.999831	0.644204	0.355796
	2	59	18	49.5209	10.4699	1.01994	46.5031	1.66748	11.9068	1.19537	141.762	0.999772	0.000228459	0.977446	0.0225541
	2	60	1	0.911394	0.750233	-0.124804	156.597	2.19478	85.1873	-1.56348	90.8666	0.000941121	0.999059	0.09174	0.90826
	2	60	2	4.76259	1.70053	0.230584	118.455	2.07355	45.8937	-18.1304	207.756	0.080662	0.919338	0.994736	0.0052641
	2	60	3	7.30782	0.100031	-0.999865	233.971	2.36916	206.687	-2.75569	44.6039	1.71542e-07	1	3.34669e-09	1
	2	60	4	7.64682	1.05588	0.0236158	78.8299	1.89669	33.896	-28.8515	237.863	0.0359882	0.964012	0.999851	0.000148989
	2	60	5	11.0812	0.233406	-0.631889	220.403	2.34322	201.091	-6.45374	83.9445	2.68012e-06	0.999997	3.99431e-08	1
	2	60	6	12.7039	45.9587	1.66237	53.0099	1.72436	10.3812	-25.7228	231.23	1	1.39618e-08	0.999685	0.00031457
	3	61	1	1.88387	0.166714	-0.778027	191	2.28103	134.018	-14.1223	138.241	2.10177e-06	0.999998	0.00889614	0.991104
	3	61	2	8.30794	4.5902	0.661832	44.1634	1.64506	14.2832	-28.6875	238.608	0.984306	0.0156943	0.999885	0.000114817
	3	61	3	15.3877	0.666858	-0.175967	91.7129	1.96243	43.5345	-21.3077	163.862	0.0042985	0.995701	0.987546	0.0124538
	3	61	4	17.9218	1.4782	0.169734	56.5384	1.75234	31.206	-26.067	206.874	0.24727	0.75273	0.999155	0.000845338
	3	61	5	20.6337	10.9976	1.0413	32.4757	1.51156	7.75219	-17.3199	153.969	0.999832	0.000168206	0.983642	0.0163578
	3	61	6	46.3077	0.2334	-0.631899	184.162	2.2652	143.715	-4.21956	99.9787	6.79224e-06	0.999993	0.000379096	0.999621
	3	61	7	58.1722	0.122257	-0.912725	77.119	1.88716	57.0168	-15.5937	147.33	0.000145712	0.999854	0.8906	0.1094
	0.2	62	1	1.57271	0.288978	-0.539134	170.455	2.23161	145.153	-2.65383	40.5096	1.95442e-05	0.99998	5.21697e-05	0.999948
	0.2	62	2	7.00773	1.03365	0.0143751	169.292	2.22864	96.2975	-2.46054	162.029	0.00285614	0.997144	0.719809	0.280191
	0.2	62	3	8.76939	0.266749	-0.573897	179.928	2.2551	165.482	0.187455	15.5456	1.16002e-05	0.999988	1.6252e-06	0.999998
	0.2	62	4	9.57519	0.211177	-0.675354	183.453	2.26352	124.926	-16.2826	144.074	5.12472e-06	0.999995	0.0394623	0.960538
	0.2	62	5	15.9772	0.394567	-0.403879	136.509	2.13516	103.836	5.51565	11.026	0.000150455	0.99985	0.00350787	0.996492
	0.2	62	6	34.1106	0.411239	-0.385906	152.374	2.18291	89.9311	1.15322	88.6007	0.000106814	0.999893	0.0752766	0.924723
	0.2	62	7	35.9334	0.333437	-0.476987	150.65	2.17797	102.559	-7.34635	92.9792	5.56471e-05	0.999944	0.0264742	0.973526
	0.2	62	8	38.0951	0.661316	-0.179591	143.978	2.1583	105.746	-6.16958	85.6053	0.000780546	0.999219	0.0150581	0.984942
	0.2	62	9	40.946	0.494598	-0.305748	143.324	2.15632	94.9922	2.40923	84.0693	0.000266773	0.999733	0.0495094	0.950491
	0.2	62	10	42.5688	1.34486	0.128678	146.052	2.16451	94.9698	-3.59631	71.686	0.0155195	0.984481	0.0250639	0.974936
	0.2	62	11	44.386	0.36678	-0.435594	145.408	2.16259	128.634	1.24496	22.7526	8.92971e-05	0.999911	0.000263431	0.999737
	0.2	62	12	45.992	0.550171	-0.259503	142.379	2.15345	105.803	-6.74186	53.8534	0.000404573	0.999595	0.0107149	0.989285
	0.2	62	13	48.0649	0.422353	-0.374324	138.879	2.14264	116.25	0.580666	33.3597	0.000175416	0.999825	0.00130681	0.998693
	10	63	1	0.227843	0.238957	-0.62168	190.397	2.27966	136.815	-8.38897	116.08	6.16128e-06	0.999994	0.00172026	0.99828
	10	63	2	2.03947	0.200057	-0.698845	205.524	2.31286	186.19	-5.33541	59.2516	2.38998e-06	0.999998	2.07745e-07	1
	10	63	3	2.58407	0.188943	-0.723669	195.334	2.29078	184.17	-1.26699	59.907	2.65058e-06	0.999997	2.54206e-07	1
	10	63	4	8.01897	0.188943	-0.723669	237.501	2.37567	217.135	-5.95796	72.6975	9.14808e-07	0.999999	1.41416e-09	1
	10	63	5	10.3974	0.211172	-0.675364	225.104	2.35238	205.755	-10.7999	78.711	1.73654e-06	0.999998	2.38512e-08	1
	10	63	6	15.4266	0.316757	-0.499273	163.461	2.21342	77.1524	-0.151677	132.769	3.21617e-05	0.999968	0.649715	0.350285
	10	63	7	16.1324	8.08009	0.907416	31.755	1.50181	9.82936	-34.3719	241.898	0.99918	0.000820115	0.999987	1.34375e-05
	10	63	8	26.0797	0.216729	-0.664083	191.686	2.28259	163.661	4.71261	28.2044	4.40354e-06	0.999996	2.7594e-06	0.999997
	10	63	9	28.6804	0.716872	-0.144558	64.398	1.80887	26.9161	-8.40872	206.075	0.0181268	0.981873	0.997779	0.00222083
	10	63	10	31.0978	12.5147	1.09742	44.8837	1.65209	5.22888	-27.7512	239.37	0.999918	8.17944e-05	0.999859	0.000140882
	10	63	11	45.652	14.343	1.15664	47.1613	1.67359	10.8802	-28.2099	239.624	0.999964	3.64902e-05	0.999876	0.000124247
	0	64	1	12.8707	0.372338	-0.429063	217.87	2.3382	74.9423	-1.29061	167.893	1.45857e-05	0.999985	0.956815	0.043185
	0	64	2	27.4418	0.283421	-0.547568	176.258	2.24615	109.376	-2.55366	51.0475	1.55975e-05	0.999984	0.00418099	0.995819
	0	64	3	30.6095	0.30565	-0.514775	167.291	2.22347	120.665	-0.558342	49.8778	2.56444e-05	0.999974	0.00110127	0.998899
	0	64	4	36.4446	0.333437	-0.476987	167.684	2.22449	78.5243	-8.74025	125.911	3.38049e-05	0.999966	0.359174	0.640826
	0	64	5	44.0248	0.400124	-0.397805	137.941	2.13969	107.147	-11.1473	98.3671	0.000150577	0.999849	0.0313685	0.968631
	0	64	6	46.0698	0.261192	-0.58304	190.692	2.28033	112.321	2.52817	88.7574	8.11149e-06	0.999992	0.0138823	0.986118
	0	64	7	47.5092	0.472369	-0.325719	177.127	2.24828	74.0205	-0.115299	142.671	9.13694e-05	0.999909	0.816907	0.183093
	0	64	8	52.8219	0.238963	-0.621669	187.545	2.27311	160.581	-1.58838	23.9835	6.65594e-06	0.999993	4.3764e-06	0.999996
	0	64	9	56.2341	0.288978	-0.539134	170.664	2.23214	158.185	-0.641058	46.2138	1.94288e-05	0.999981	8.58254e-06	0.999991
	5	65	1	0	0.105586	-0.976394	165.943	2.21996	144.296	-8.73235	50.0382	1.5431e-06	0.999998	0.00265996	0.99734
	5	65	2	0.522372	0.211172	-0.675364	164.023	2.2149	131.085	1.77189	55.3958	9.16454e-06	0.999991	0.000406093	0.999594
	5	65	3	7.68554	0.550158	-0.259513	82.5388	1.91666	57.3679	-0.55417	112.485	0.00335898	0.996641	0.619753	0.380247
	5	65	4	8.66915	1.05586	0.0236056	67.4006	1.82866	41.3588	-16.2756	144.121	0.0559593	0.944041	0.945898	0.0541016
	5	65	5	16.1213	0.222286	-0.653088	180.219	2.2558	149.798	1.16707	30.4203	6.54765e-06	0.999993	1.89217e-05	0.999981
	5	65	6	17.3161	0.205614	-0.686946	189.844	2.2784	179.48	-1.6261	30.5993	3.95562e-06	0.999996	2.51089e-07	1
	5	65	7	18.8665	0.166714	-0.778027	194.343	2.28857	150.489	1.58415	46.3549	1.91017e-06	0.999998	2.57928e-05	0.999974
	5	65	8	19.45	0.261186	-0.58305	174.562	2.24195	156.902	1.86921	7.50716	1.26142e-05	0.999987	4.85195e-06	0.999995
	5	65	9	27.908	0.527929	-0.277424	119.46	2.07722	79.1788	-1.84403	55.4731	0.000706307	0.999294	0.062074	0.937926
	5	65	10	29.0583	1.35039	0.130458	48.3487	1.68438	15.5361	-24.2211	197.824	0.257083	0.742917	0.998648	0.00135201
	5	65	11	33.7152	0.411229	-0.385916	106.834	2.02871	51.9644	-10.8126	137.044	0.000490857	0.999509	0.809095	0.190905
	5	65	12	36.7994	0.372329	-0.429073	107.16	2.03003	76.2082	3.87613	71.0553	0.000358169	0.999642	0.135281	0.864719
	5	65	13	37.8831	1.3226	0.121429	90.7718	1.95795	47.1571	-20.0364	140.326	0.0569942	0.943006	0.972678	0.0273221
	5	65	14	40.1726	7.21874	0.858461	46.2043	1.66468	16.6119	-23.5773	291.36	0.998271	0.0017291	0.99999	9.79614e-06
	5	65	15	49.5753	0.505701	-0.296107	69.9767	1.84495	42.9396	-11.1897	82.8553	0.00481348	0.995187	0.765589	0.234411
	5	65	16	51.1813	8.81364	0.945155	46.3451	1.666	19.1278	-22.0521	162.031	0.999405	0.000594571	0.995134	0.0048664
	0.3	66	1	0.36678	0.283421	-0.547568	224.936	2.35206	197.086	-4.63555	56.1348	4.64975e-06	0.999995	2.85769e-08	1
	0.3	66	2	2.41742	0.200062	-0.698835	224.601	2.35141	191.307	1.63344	43.5482	1.48264e-06	0.999999	4.79623e-08	1
	0.3	66	3	4.82372	0.18339	-0.736624	190.248	2.27932	163.164	7.6335	11.5557	2.80433e-06	0.999997	2.36497e-06	0.999998
	0.3	66	4	5.8018	0.327879	-0.484286	163.452	2.21339	117.475	-13.4554	118.864	3.60342e-05	0.999964	0.0257133	0.974287
	0.3	66	5	6.70764	0.344551	-0.462746	168.351	2.22622	89.7648	-13.1533	191.713	3.70609e-05	0.999963	0.88406	0.11594
	0.3	66	6	7.90801	1.00031	0.000134662	229.78	2.36131	76.5189	9.03055	133.667	0.000817363	0.999183	0.979799	0.0202014
	0.3	66	7	9.30288	0.272307	-0.564942	203.208	2.30794	165.948	-4.62596	98.6723	6.75935e-06	0.999993	1.86892e-05	0.999981
	0.3	66	8	10.0253	0.650202	-0.186952	155.1	2.19061	62.4177	-16.9759	200.018	0.000546449	0.999454	0.983822	0.0161779
	0.3	66	9	17.3443	0.583514	-0.233949	182.821	2.26203	81.7386	3.79417	103.53	0.000182472	0.999818	0.346726	0.653274
	0.3	66	10	24.5798	3.02316	0.480461	80.251	1.90445	27.9511	3.31571	139.814	0.775284	0.224716	0.982205	0.0177954
	0.3	66	11	28.2588	0.344551	-0.462746	164.919	2.21727	101.806	-1.41291	78.6052	4.07839e-05	0.999959	0.0160445	0.983955
	0.3	66	12	33.1936	0.916951	-0.0376539	125.699	2.09933	60.7301	-3.92718	154.474	0.00474589	0.995254	0.900792	0.0992081
	0.3	66	13	37.2282	0.589072	-0.229832	92.0656	1.9641	38.9215	-7.26833	136.642	0.00279068	0.997209	0.86291	0.13709
	0.3	66	14	38.3119	0.416796	-0.380077	120.331	2.08038	49.261	-6.11413	92.6799	0.000310159	0.99969	0.521511	0.478489
	0.3	66	15	50.3434	0.194505	-0.71107	232.308	2.36606	210.002	3.67436	33.3344	1.13046e-06	0.999999	1.39554e-09	1
	0.3	66	16	50.8602	0.544613	-0.263912	108.448	2.03522	50.2794	-10.5139	146.398	0.00115084	0.998849	0.862115	0.137885
	0.3	66	17	55.106	0.261192	-0.58304	134.876	2.12993	89.6539	-2.19065	88.881	4.45502e-05	0.999955	0.0604401	0.93956
	0.3	66	18	57.5178	0.144489	-0.840164	192.687	2.28485	168.023	-3.83786	39.481	1.36393e-06	0.999999	2.18646e-06	0.999998
	1	67	1	0.1945	0.366772	-0.435604	118.952	2.07537	69.1449	-11.7946	142.962	0.000217627	0.999782	0.693531	0.306469
	1	67	2	4.0067	0.761329	-0.118427	58.1043	1.76421	23.4561	2.05227	185.927	0.0301109	0.969889	0.999442	0.000557529
	1	67	3	7.05758	0.516815	-0.286665	206.882	2.31572	54.1532	9.05787	142.57	6.61254e-05	0.999934	0.996937	0.00306333
	1	67	4	8.43575	0.855801	-0.0676273	86.5663	1.93735	37.1952	-26.5855	170.884	0.0125939	0.987406	0.998563	0.00143708
	1	67	5	12.7314	0.389	-0.41005	108.218	2.0343	78.1655	-8.89878	72.0367	0.000391991	0.999608	0.172371	0.827629
	1	67	6	13.7928	0.694644	-0.158238	72.6	1.86094	34.3452	-19.6298	188.424	0.0110587	0.988941	0.992707	0.00729319
	1	67	7	15.2599	0.461243	-0.33607	86.2959	1.93599	23.6041	-7.92134	184.445	0.00165479	0.998345	0.990783	0.00921689
	1	67	8	22.8955	6.55744	0.816734	48.6881	1.68742	10.7584	-24.5764	198.918	0.99704	0.00296027	0.998868	0.00113246
	1	67	9	36.2382	9.53607	0.979369	60.6458	1.7828	11.2058	-24.4713	207.585	0.999569	0.000430705	0.999058	0.000942148
	1	67	10	49.6309	10.3641	1.01553	50.3803	1.70226	12.4688	-30.3265	258.907	0.999753	0.000247265	0.999967	3.29045e-05
	0.5	68	1	0.722446	0.238963	-0.621669	192.774	2.28505	173.235	-2.88719	37.2427	5.78234e-06	0.999994	8.49809e-07	0.999999
	0.5	68	2	1.35598	0.272307	-0.564942	188.758	2.27591	145.531	-9.39402	76.6635	9.77083e-06	0.99999	0.000207568	0.999792
	0.5	68	3	2.05064	0.250078	-0.601925	171.797	2.23502	150.352	-6.88305	77.3458	1.19373e-05	0.999988	7.90973e-05	0.999921
	0.5	68	4	4.65144	0.227848	-0.642354	204.226	2.31011	185.524	-2.15053	43.9832	3.69341e-06	0.999996	1.26804e-07	1
	0.5	68	5	6.89658	0.288978	-0.539134	221.549	2.34547	87.5416	-25.3908	164.223	5.37001e-06	0.999995	0.960038	0.0399616
	0.5	68	6	7.61347	0.161161	-0.79274	196.812	2.29405	180.621	0.623887	19.8603	1.62235e-06	0.999998	1.50538e-07	1
	0.5	68	7	11.5591	0.18339	-0.736624	191.919	2.28312	164.816	4.46524	4.96508	2.67493e-06	0.999997	1.32573e-06	0.999999
	0.5	68	8	22.6793	0.322322	-0.49171	180.428	2.25631	112.375	-8.13431	75.6149	2.13304e-05	0.999979	0.0081701	0.99183
	0.5	68	9	23.3684	0.227848	-0.642354	195.129	2.29032	179.324	-0.504199	31.7766	4.68034e-06	0.999995	2.4539e-07	1
	0.5	68	10	24.6465	0.205619	-0.686936	182.795	2.26196	162.982	-5.3054	38.368	4.82785e-06	0.999995	5.724e-06	0.999994
	0.5	68	11	25.5413	0.30565	-0.514775	190.615	2.28016	163.541	-2.36397	49.8791	1.36764e-05	0.999986	4.57887e-06	0.999995
	0.5	68	12	29.3424	0.18339	-0.736624	212.818	2.32801	169.651	-3.01553	69.8982	1.52513e-06	0.999998	3.40134e-06	0.999997
	0.5	68	13	29.837	0.24452	-0.611685	209.787	2.32178	179.134	-2.59868	61.9489	4.03017e-06	0.999996	6.0568e-07	0.999999
	0.5	68	14	37.6283	0.172276	-0.763776	206.099	2.31408	161.138	-0.622655	56.1717	1.51564e-06	0.999998	7.49891e-06	0.999993
	0.5	68	15	40.8516	0.311208	-0.50695	180.088	2.25548	153.352	0.161476	46.7985	1.91217e-05	0.999981	1.70943e-05	0.999983
	0.5	68	16	41.7296	0.283421	-0.547568	190.059	2.27889	132.224	-8.46282	67.0564	1.07707e-05	0.999989	0.000835468	0.999165
	0.5	68	17	46.9757	0.272307	-0.564942	153.839	2.18707	109.596	2.51932	38.9368	2.66831e-05	0.999973	0.00288293	0.997117
	0.5	68	18	48.7429	0.18339	-0.736624	202.743	2.30695	184.342	-0.921169	33.1564	1.98675e-06	0.999998	1.13183e-07	1
	0.5	68	19	51.3048	8.69158	0.939099	45.4845	1.65786	10.5372	2.39878	120.481	0.999364	0.000636491	0.943125	0.056875
	2	69	1	0.950272	0.244515	-0.611695	173.158	2.23844	145.561	-4.34114	59.8218	1.071e-05	0.999989	7.97192e-05	0.99992
	2	69	2	1.63936	0.244515	-0.611695	159.351	2.20235	85.3949	-8.87062	117.867	1.62403e-05	0.999984	0.207276	0.792724
	2	69	3	3.45099	0.255629	-0.59239	155.476	2.19166	114.735	2.39629	87.9138	2.09419e-05	0.999979	0.01029	0.98971
	2	69	4	4.83472	1.01696	0.0073031	86.2224	1.93562	20.423	4.5414	133.754	0.0240362	0.975964	0.98355	0.0164502
	2	69	5	10.3919	0.177829	-0.749998	190.422	2.27972	160.924	5.29124	16.6125	2.55742e-06	0.999997	3.10218e-06	0.999997
	2	69	6	11.909	0.216729	-0.664083	198.556	2.29788	167.55	-1.59635	43.918	3.66202e-06	0.999996	2.11692e-06	0.999998
	2	69	7	16.0435	0.255629	-0.59239	192.285	2.28395	170.665	3.35983	18.0651	7.25737e-06	0.999993	6.83404e-07	0.999999
	2	69	8	20.1613	6.00172	0.778276	36.5444	1.56282	9.28841	-17.0969	137.686	0.996254	0.00374573	0.979142	0.0208581
	2	69	9	26.9633	0.711315	-0.147938	69.7196	1.84335	33.975	2.86312	72.8532	0.0136497	0.98635	0.585944	0.414056
	2	69	10	28.9361	0.372329	-0.429073	106.684	2.0281	67.2696	-2.33153	116.016	0.000365082	0.999635	0.478579	0.521421
	2	69	11	31.0367	0.211172	-0.675364	158.163	2.1991	124.688	-0.964602	49.3162	1.10521e-05	0.999989	0.000697199	0.999303
	2	69	12	36.8939	23.0955	1.36353	37.9789	1.57954	9.70167	-4.94949	54.3065	0.999998	2.13507e-06	0.776172	0.223828
	6	70	1	0.616858	0.266749	-0.573897	145.151	2.16182	131.431	1.28094	14.9342	3.32356e-05	0.999967	0.000173414	0.999827
	6	70	2	2.11177	0.30565	-0.514775	151.388	2.18009	98.5759	2.71554	63.3796	4.11995e-05	0.999959	0.0167101	0.98329
	6	70	3	4.74036	1.02254	0.00967998	64.7014	1.81091	32.2728	-12.8218	105.243	0.0561964	0.943804	0.883426	0.116574
	6	70	4	15.0102	0.350109	-0.455797	140.235	2.14686	86.3473	-3.75683	69.5545	9.03697e-05	0.99991	0.0495722	0.950428
	6	70	5	26.2026	0.411239	-0.385906	116.575	2.0666	78.1327	-0.35482	66.1709	0.00033987	0.99966	0.0777393	0.922261
	6	70	6	27.5808	0.333437	-0.476987	140.291	2.14703	100.699	2.55573	36.888	7.72199e-05	0.999923	0.00672403	0.993276
	6	70	7	28.4588	0.316765	-0.499263	150.219	2.17672	120.731	-0.714331	50.5594	4.78393e-05	0.999952	0.001113	0.998887
	6	70	8	30.1038	17.4999	1.24303	45.0761	1.65395	12.5991	-3.33833	145.588	0.999989	1.09723e-05	0.957658	0.042342
	6	70	9	51.1936	8.79717	0.944343	36.5116	1.56243	12.2376	-16.4597	135.551	0.999447	0.000552999	0.973907	0.0260934
	2	71	1	1.76717	0.650184	-0.186964	76.8905	1.88587	27.2106	-16.0006	103.028	0.00735152	0.992648	0.957822	0.0421783
	2	71	2	3.96223	0.266742	-0.573908	135.717	2.13263	86.8168	-0.256075	89.4654	4.59317e-05	0.999954	0.0848447	0.915155
	2	71	3	7.2076	7.57993	0.879665	48.1922	1.68298	9.08006	-8.89591	246.911	0.99863	0.00137027	0.999934	6.57081e-05
	2	71	4	15.9045	1.03918	0.0166922	63.9591	1.8059	36.2139	-12.7474	89.8953	0.0611952	0.938805	0.866728	0.133272
	2	71	5	17.3716	0.789112	-0.102861	64.1302	1.80706	11.7651	-20.2686	194.499	0.0248007	0.975199	0.996424	0.00357576
	2	72	1	0.300085	0.461242	-0.336071	118.265	2.07286	41.5509	2.25867	62.3975	0.00046487	0.999535	0.429595	0.570405
	2	72	2	3.04531	0.500142	-0.300907	85.2965	1.93093	29.544	-3.6335	191.282	0.00221091	0.997789	0.997442	0.00255833
	2	72	3	8.17454	8.53575	0.931242	41.9249	1.62247	10.7007	-15.2021	167.898	0.999321	0.000678731	0.982242	0.0177581
	2	72	4	28.9915	29.0027	1.46244	41.101	1.61385	9.78186	-19.9486	166.83	1	4.6065e-07	0.992697	0.00730262
	2	72	5	58.9222	1.07253	0.0304079	36.9452	1.56756	15.9918	-13.5381	251.678	0.241929	0.758071	0.999883	0.000116757
	2	73	1	0.761327	0.550156	-0.259514	113.049	2.05327	51.3053	-7.57521	138.729	0.00101322	0.998987	0.808484	0.191516
	2	73	2	2.94528	0.489027	-0.310667	113.614	2.05543	29.9758	4.81077	141.292	0.000665457	0.999335	0.989818	0.0101825
	2	73	3	6.32957	0.489027	-0.310667	81.818	1.91285	38.7893	-31.3329	213.363	0.00242333	0.997577	0.999862	0.000138283
	2	73	4	13.2093	2.64519	0.422458	43.5871	1.63936	12.8963	-22.1898	177.016	0.848019	0.151981	0.996495	0.00350467
	2	73	5	20.5447	25.0904	1.39951	44.7841	1.65112	6.18834	2.60303	18.3883	0.999999	1.11371e-06	0.660663	0.339337
	2	73	6	46.3631	13.6316	1.13455	48.3252	1.68417	8.60119	-17.4308	225.155	0.999951	4.94269e-05	0.998848	0.00115217
	2	74	1	0.111143	0.205614	-0.686948	220.999	2.34439	199.804	-2.21584	77.3714	1.76192e-06	0.999998	1.80945e-06	0.999998
	2	74	2	1.7894	0.316756	-0.499275	170.985	2.23296	69.3872	-5.7661	191.008	2.59856e-05	0.999974	0.984659	0.0153414
	2	74	3	2.41179	0.211171	-0.675366	149.498	2.17464	55.5024	-21.9065	190.587	1.47472e-05	0.999985	0.990777	0.00922267
	2	74	4	7.88557	0.60017	-0.221726	56.4832	1.75192	23.9116	-11.3799	214.14	0.0165717	0.983428	0.998156	0.0018439
	2	74	5	9.84168	0.672413	-0.172364	51.3439	1.71049	19.2285	-27.0909	168.779	0.0308813	0.969119	0.999314	0.000685942
	2	74	6	15.7322	0.177828	-0.749999	203.74	2.30908	165.223	-13.6666	130.98	1.76888e-06	0.999998	0.000125	0.999875
	2	74	7	29.9918	0.1945	-0.711081	133.911	2.12682	48.7255	1.21868	118.64	2.0842e-05	0.999979	0.81721	0.18279
	2	74	8	32.8927	8.82472	0.945701	51.1991	1.70926	13.468	-20.1609	160.236	0.999383	0.000617319	0.99207	0.0079298
	0.3	75	1	10.9531	0.344543	-0.462756	172.903	2.2378	116.31	-9.06049	164.553	3.27253e-05	0.999967	0.164916	0.835084
	0.3	75	2	11.859	0.2723	-0.564952	186.781	2.27133	152.658	1.07018	50.2358	1.02952e-05	0.99999	2.12483e-05	0.999979
	0.3	75	3	18.5053	0.322315	-0.49172	127.58	2.10578	100.779	-2.06005	68.3368	0.000107281	0.999893	0.0131226	0.986877
	0.3	75	4	19.3	0.522372	-0.28202	149.558	2.17481	102.937	11.1673	16.9843	0.000272933	0.999727	0.00797879	0.992021
	0.3	75	5	20.278	0.344543	-0.462756	185.492	2.26832	166.29	3.10694	4.07517	2.3535e-05	0.999976	1.06667e-06	0.999999
	0.3	75	6	22.8566	0.450129	-0.346663	141.907	2.152	82.72	-0.309569	64.5546	0.000199165	0.999801	0.0539552	0.946045
	0.3	75	7	31.2312	0.811344	-0.0907951	174.336	2.24139	123.474	3.60612	36.6217	0.00087525	0.999125	0.00062924	0.999371
	0.3	75	8	34.7155	0.261186	-0.58305	216.702	2.33586	152.266	-7.76746	105.085	4.24559e-06	0.999996	0.000159592	0.99984
	0.3	75	9	56.5996	0.166714	-0.778027	299.415	2.47627	278.754	-0.00228545	33.6638	1.66552e-07	1	5.23319e-16	1
	0.3	75	10	59.3226	0.188943	-0.723669	260.01	2.41499	244.035	1.50581	10.3792	5.5449e-07	0.999999	6.74523e-13	1
	0.3	75	11	59.7838	0.205614	-0.686946	230.105	2.36193	215.835	-3.2455	43.4558	1.41791e-06	0.999999	6.07736e-10	1
	0.3	76	1	9.90284	0.277857	-0.556178	193.554	2.2868	172.015	-1.98031	30.6641	9.21645e-06	0.999991	8.55413e-07	0.999999
	0.3	76	2	12.3591	0.872472	-0.0592483	205.07	2.3119	94.6089	9.0101	75.1003	0.000656216	0.999344	0.129247	0.870753
	0.3	76	3	13.5872	0.283415	-0.547578	182.738	2.26183	133.707	6.75671	67.3493	1.30676e-05	0.999987	0.00108414	0.998916
	0.3	76	4	14.2263	0.1556	-0.80799	194.289	2.28845	143.684	-8.38501	82.6389	1.58442e-06	0.999998	0.000254049	0.999746
	0.3	76	5	14.6042	0.183386	-0.736634	231.612	2.36476	205.599	-5.67141	81.3313	9.58077e-07	0.999999	1.59402e-08	1
	0.3	76	6	21.4839	0.238957	-0.62168	193.986	2.28777	154.644	6.94127	15.7032	5.59907e-06	0.999994	8.54138e-06	0.999991
	0.3	76	7	30.1586	0.161157	-0.79275	253.375	2.40376	228.022	-5.39879	57.9572	3.90853e-07	1	1.01062e-10	1
	0.3	76	8	37.2329	0.227843	-0.642364	142.682	2.15437	78.7598	-12.284	92.3072	2.30143e-05	0.999977	0.311343	0.688657
	0.3	76	9	50.4867	0.205614	-0.686946	265.282	2.42371	233.661	-2.81383	52.9935	6.54357e-07	0.999999	2.43256e-11	1
	0.3	76	10	51.4092	0.183386	-0.736634	150.746	2.17824	85.112	-15.2556	156.076	9.69111e-06	0.99999	0.646656	0.353344
	0.3	76	11	51.9371	0.211172	-0.675364	230.986	2.36359	215.797	0.49722	26.1223	1.51234e-06	0.999998	3.29409e-10	1
	0.3	76	12	54.8213	0.122257	-0.912725	259.432	2.41402	232.996	1.83722	30.2779	1.53526e-07	1	1.27289e-11	1
	0.3	76	13	55.2658	0.238957	-0.62168	209.209	2.32058	154.68	6.09593	119.116	3.79384e-06	0.999996	0.00322236	0.996778
	0.3	77	1	2.9953	0.2334	-0.631899	228.717	2.3593	162.869	0.667889	91.3445	2.20705e-06	0.999998	3.23339e-05	0.999968
	0.3	77	2	8.91367	0.327872	-0.484296	213.595	2.32959	167.39	-2.56135	78.1535	1.00579e-05	0.99999	6.53583e-06	0.999993
	0.3	77	3	9.58052	0.455686	-0.341334	211.934	2.3262	153.631	-10.3191	92.176	3.59834e-05	0.999964	0.000111689	0.999888
	0.3	77	4	10.3585	0.172272	-0.763786	240.875	2.38179	221.43	1.86257	23.9292	6.36734e-07	0.999999	1.03897e-10	1
	0.3	77	5	13.615	0.383443	-0.416299	150.904	2.1787	86.3079	-7.42041	130.81	8.77189e-05	0.999912	0.27948	0.72052
	0.3	77	6	15.8268	0.694644	-0.158238	172.047	2.23565	104.511	-2.15555	87.0034	0.000476162	0.999524	0.0163016	0.983698
	0.3	77	7	22.2619	0.300086	-0.522754	174.282	2.24125	158.838	-0.665642	23.2909	1.98426e-05	0.99998	5.14594e-06	0.999995
	0.3	77	8	27.3023	0.238957	-0.62168	167.863	2.22495	134.379	3.50232	31.3536	1.16825e-05	0.999988	0.000149518	0.99985
	0.3	77	9	27.8469	0.205614	-0.686946	178.409	2.25142	156.766	-6.23781	53.681	5.4834e-06	0.999995	1.92587e-05	0.999981
	0.3	77	10	28.4582	0.216729	-0.664083	176.219	2.24605	157.974	-2.36484	27.3808	6.82035e-06	0.999993	7.24243e-06	0.999993
	0.3	77	11	30.4865	0.277857	-0.556178	138.659	2.14195	122.978	1.74345	10.5698	4.6706e-05	0.999953	0.000462828	0.999537
	0.3	77	12	33.7208	0.366772	-0.435604	162.595	2.21111	132.385	-0.153172	59.5628	5.38215e-05	0.999946	0.000365249	0.999635
	0.3	77	13	36.0548	0.366772	-0.435604	139.702	2.1452	103.372	-7.8835	73.8286	0.000106853	0.999893	0.0188401	0.98116
	0.3	77	14	37.0328	0.383443	-0.416299	142.48	2.15375	122.791	-6.31657	60.275	0.000113299	0.999887	0.00166384	0.998336
	0.3	77	15	37.9498	0.372329	-0.429073	139.912	2.14585	96.9285	-1.67685	55.635	0.000111482	0.999889	0.0142349	0.985765
	0.3	77	16	41.9954	0.111143	-0.954118	215.583	2.33361	194.032	-2.4934	48.6841	3.64957e-07	1	3.47409e-08	1
	0.3	77	17	42.4733	0.2334	-0.631899	210.284	2.32281	175.828	0.567114	51.3602	3.42464e-06	0.999997	7.37881e-07	0.999999
	0.3	77	18	44.0071	0.2723	-0.564952	181.453	2.25877	159.916	-4.20319	52.8742	1.18834e-05	0.999988	9.44966e-06	0.999991
	0.3	77	19	45.3686	0.1945	-0.71108	267.205	2.42685	252.565	-0.0858835	19.1842	5.23508e-07	0.999999	1.36863e-13	1
	0.3	77	20	45.8187	0.183386	-0.736634	235.858	2.37265	219.715	0.363285	25.0047	8.66601e-07	0.999999	1.50332e-10	1
	0.3	77	21	46.4189	0.205614	-0.686946	230.429	2.36254	179.956	-3.75501	70.6782	1.4072e-06	0.999999	7.30828e-07	0.999999
	0.3	77	22	46.9523	0.255629	-0.59239	202.525	2.30648	177.846	-2.79199	49.7209	5.57952e-06	0.999994	5.24407e-07	0.999999
	0.3	77	23	56.2717	0.172272	-0.763786	251.696	2.40088	242.475	-1.28549	22.4949	4.97354e-07	1	1.43393e-12	1
	0.3	77	24	57.2164	0.211172	-0.675364	238.102	2.37676	197.782	-2.82203	49.421	1.28474e-06	0.999999	1.88081e-08	1
	0.3	77	25	57.6832	0.1945	-0.71108	205.571	2.31296	139.917	-0.0069494	113.536	2.19311e-06	0.999998	0.00206898	0.997931
	0.2	78	1	1.24483	0.433466	-0.363045	125.796	2.09967	112.901	-1.19226	19.8514	0.000292196	0.999708	0.00203711	0.997963
	0.2	78	2	2.25069	0.372336	-0.429064	122.359	2.08764	102.15	-0.563584	41.9904	0.000201549	0.999798	0.00672495	0.993275
	0.2	78	3	3.98456	0.316764	-0.499264	150.76	2.17829	129.774	-2.17953	36.9487	4.7041e-05	0.999953	0.00034328	0.999657
	0.2	78	4	11.7536	0.238962	-0.621671	192.691	2.28486	150.299	-1.67322	40.2712	5.79504e-06	0.999994	2.3846e-05	0.999976
	0.2	78	5	15.5826	0.316764	-0.499264	180.996	2.25767	120.586	-1.9034	79.7247	1.98114e-05	0.99998	0.00257007	0.99743
	0.2	78	6	16.3661	0.322321	-0.491711	166.75	2.22207	139.49	-2.01334	60.7827	3.10002e-05	0.999969	0.000157902	0.999842
	0.2	78	7	18.0889	0.711329	-0.147929	102.431	2.01043	70.5181	0.947057	57.9588	0.00363898	0.996361	0.110048	0.889952
	0.2	78	8	19.8839	0.272306	-0.564943	170.47	2.23165	142.749	2.08549	36.8116	1.6168e-05	0.999984	5.62473e-05	0.999944
	0.2	78	9	23.5683	0.227848	-0.642355	213.994	2.3304	199.787	0.75273	24.6074	2.89343e-06	0.999997	6.12832e-09	1
	0.2	78	10	27.6085	0.75023	-0.124806	144.012	2.1584	57.3792	-4.27738	120.848	0.00128858	0.998711	0.625455	0.374545
	0.2	78	11	33.1491	0.255634	-0.592381	172.473	2.23672	139.445	-2.22297	32.654	1.2526e-05	0.999987	9.74719e-05	0.999903
	0.2	78	12	39.2009	0.383451	-0.41629	132.814	2.12324	100.834	-2.01189	49.5366	0.00015452	0.999845	0.00921196	0.990788
	0.2	78	13	44.3414	0.316764	-0.499264	134.198	2.12775	103.363	6.39172	10.0199	8.07214e-05	0.999919	0.00373351	0.996266
	0.2	78	14	46.3031	0.244519	-0.611687	195.227	2.29054	111.216	2.35457	96.8821	5.82878e-06	0.999994	0.0231792	0.976821
	0.2	78	15	46.9644	0.200061	-0.698837	195.867	2.29196	152.987	0.68232	63.592	3.0904e-06	0.999997	3.20194e-05	0.999968
	0.2	78	16	54.8446	0.372336	-0.429064	149.696	2.17521	107.66	-4.85971	80.8861	8.23685e-05	0.999918	0.0102797	0.98972
	0.2	78	17	55.706	0.305649	-0.514777	160.665	2.20592	127.526	1.72354	22.6852	3.10896e-05	0.999969	0.000295045	0.999705
	0.2	78	18	56.295	0.305649	-0.514777	162.751	2.21152	81.1947	-9.66751	117.646	2.9239e-05	0.999971	0.273553	0.726447
	0.2	79	1	0.400123	0.389008	-0.410041	109.066	2.03769	85.9841	0.642423	23.2567	0.000379208	0.999621	0.0240645	0.975935
	0.2	79	2	6.10187	0.327878	-0.484287	216.558	2.33557	154.834	2.52365	133.641	9.40787e-06	0.999991	0.00323717	0.996763
	0.2	79	3	6.74651	0.177832	-0.749989	225.141	2.35245	165.649	-2.14577	45.9004	1.02092e-06	0.999999	3.02563e-06	0.999997
	0.2	79	4	12.4538	0.166718	-0.778018	241.356	2.38266	214.99	4.13168	56.9545	5.7037e-07	0.999999	1.8538e-09	1
	0.2	79	5	15.1157	0.261191	-0.583041	225.487	2.35312	200.108	-0.236727	60.6865	3.46513e-06	0.999997	1.90487e-08	1
	0.2	79	6	16.2661	0.450138	-0.346654	203.16	2.30784	94.2779	-4.64336	166.647	4.14716e-05	0.999959	0.723172	0.276828
	0.2	79	7	17.7221	0.188947	-0.72366	215.201	2.33284	146.199	-11.6207	89.497	1.56919e-06	0.999998	0.000354134	0.999646
	0.2	79	8	32.7934	0.227848	-0.642355	201.282	2.3038	177.364	-4.16374	36.922	3.98347e-06	0.999996	5.07324e-07	0.999999
	0.2	79	9	34.3717	0.227848	-0.642355	207.151	2.31629	155.272	4.76028	71.8556	3.42941e-06	0.999997	6.17574e-05	0.999938
	0.2	79	10	34.9941	0.255634	-0.592381	209.286	2.32074	152.977	-1.54585	63.4389	4.72057e-06	0.999995	2.9264e-05	0.999971
	0.2	79	11	38.0339	0.28342	-0.547569	195.617	2.29141	154.719	5.48809	36.1864	9.34027e-06	0.999991	1.40556e-05	0.999986
	0.2	79	12	41.7906	0.227848	-0.642355	230.497	2.36267	204.3	-0.681913	37.6465	1.95724e-06	0.999998	3.93794e-09	1
	0.2	79	13	57.7677	0.161161	-0.792741	211.607	2.32553	181.054	3.59258	27.863	1.08274e-06	0.999999	1.71411e-07	1
	0.2	79	14	59.4127	0.172275	-0.763778	188.65	2.27566	166.086	-4.77656	48.3078	2.46267e-06	0.999998	3.73429e-06	0.999996
	3	80	1	5.85723	0.416786	-0.380087	251.283	2.40016	184.558	4.50683	111.514	1.15407e-05	0.999988	1.60055e-05	0.999984
	3	80	2	8.53578	0.200057	-0.698845	214.839	2.33211	153.387	-20.7226	149.046	1.88402e-06	0.999998	0.00437181	0.995628
	3	80	3	14.393	8.84142	0.946522	52.2981	1.71849	13.966	-13.2053	196.301	0.999383	0.000617113	0.993927	0.0060734
	3	80	4	30.3865	29.6085	1.47142	46.491	1.66737	8.91774	-24.0374	258.848	1	3.59153e-07	0.999896	0.00010436
	3	81	1	7.83558	0.689086	-0.161726	79.7807	1.9019	55.7501	-17.2791	172.493	0.00782008	0.99218	0.960673	0.039327
	3	81	2	9.49161	0.550158	-0.259513	80.9698	1.90832	48.3574	-23.3962	167.297	0.00360642	0.996394	0.992398	0.00760167
	3	81	3	11.1254	0.700201	-0.154777	75.7092	1.87915	44.6091	-14.6793	139.178	0.00985236	0.990148	0.91061	0.0893897
	3	81	4	12.7926	0.855801	-0.0676273	70.5475	1.84848	27.7065	-15.0369	127.584	0.0240492	0.975951	0.944498	0.0555021
	3	81	5	14.4375	45.5575	1.65856	35.357	1.54848	8.13631	-5.69564	154.365	1	2.59786e-08	0.965589	0.0344111
	3	82	1	0.533486	0.255629	-0.59239	162.719	2.21144	136.671	-1.88151	34.8027	1.67263e-05	0.999983	0.000137592	0.999862
	3	82	2	2.15062	0.650186	-0.186962	183.616	2.26391	87.0091	-12.4292	156.893	0.000279275	0.999721	0.565343	0.434657
	3	82	3	3.96225	0.222286	-0.653088	251.025	2.39972	221.588	-6.1534	48.1073	1.14504e-06	0.999999	2.99139e-10	1
	3	82	4	4.37903	5.51825	0.741801	71.6071	1.85496	18.95	-39.0803	289.862	0.989302	0.0106984	1	4.99277e-07
	3	82	5	10.2252	0.266743	-0.573907	152.028	2.18192	29.7218	-32.395	275.255	2.65507e-05	0.999973	0.99999	1.01641e-05
	3	82	6	10.792	0.800229	-0.0967855	80.6626	1.90667	23.0332	-21.6535	262.58	0.0125018	0.987498	0.999906	9.36758e-05
	3	82	7	18.7665	0.211172	-0.675364	239.572	2.37944	189.42	-6.42642	90.7457	1.24283e-06	0.999999	3.70991e-07	1
	3	82	8	27.3634	0.266743	-0.573907	199.978	2.30098	116.949	-13.5206	139.871	6.84067e-06	0.999993	0.0514856	0.948514
	3	82	9	28.297	31.698	1.50103	44.3296	1.64669	9.59233	-7.21304	149.875	1	2.36437e-07	0.95315	0.0468499
	3	83	1	6.77416	0.2723	-0.564952	187.824	2.27375	84.0052	-4.09476	171.369	1.00141e-05	0.99999	0.89412	0.10588
	3	83	2	9.85282	0.439015	-0.357521	98.3758	1.99289	36.4008	-16.111	207.531	0.000843897	0.999156	0.995516	0.00448355
	3	83	3	11.4866	0.744658	-0.128043	54.9209	1.73974	17.4744	-15.0976	195.247	0.0335012	0.966499	0.993532	0.00646847
	3	83	4	12.8037	11.4088	1.05724	43.2934	1.63642	13.4907	-1.65921	168.265	0.999861	0.000138789	0.992232	0.00776777
	3	83	5	29.1584	0.722429	-0.141205	63.91	1.80557	28.5817	-8.70957	214.668	0.019025	0.980975	0.998795	0.00120547
	3	83	6	32.2759	27.7191	1.44278	46.8301	1.67052	6.78044	-13.4888	201.243	0.999999	5.56478e-07	0.99545	0.00454961
	0.5	84	1	0.483482	0.52794	-0.277416	124.531	2.09528	84.2552	2.96739	52.6467	0.00059814	0.999402	0.0405338	0.959466
	0.5	84	2	2.42852	0.322321	-0.491711	148.937	2.173	109.915	3.49131	45.4076	5.26218e-05	0.999947	0.0034315	0.996569
	0.5	84	3	3.18987	0.650199	-0.186953	150.888	2.17865	47.5911	-5.24842	161.704	0.000608663	0.999391	0.952594	0.0474063
	0.5	84	4	4.06791	0.377894	-0.42263	122.683	2.08878	84.8996	-13.7166	157.479	0.000208726	0.999791	0.626562	0.373438
	0.5	84	5	8.73601	0.18339	-0.736625	227.77	2.3575	208.563	-1.45485	82.5344	1.05069e-06	0.999999	1.15702e-08	1
	0.5	84	6	11.2646	0.244519	-0.611687	173.522	2.23936	129.392	-6.41825	61.5442	1.05978e-05	0.999989	0.000792075	0.999208
	0.5	84	7	15.0213	0.205619	-0.686938	184.153	2.26518	155.357	-5.36592	55.5694	4.64355e-06	0.999995	2.1512e-05	0.999978
	0.5	84	8	18.7335	0.311207	-0.506951	167.604	2.22429	149.119	-1.4305	44.0903	2.69568e-05	0.999973	2.96704e-05	0.99997
	0.5	84	9	22.0901	0.87249	-0.0592396	90.7665	1.95793	24.5972	-17.2553	195.746	0.011586	0.988414	0.993949	0.00605086
	0.5	84	10	28.681	0.561283	-0.250818	88.7603	1.94822	55.6193	-9.85929	90.8719	0.00273076	0.997269	0.556573	0.443427
	0.5	84	11	42.0462	0.316764	-0.499264	139.47	2.14448	50.6985	-18.7126	127.645	6.75676e-05	0.999932	0.948878	0.0511221
	0.5	84	12	46.2864	0.350107	-0.455799	217.077	2.33661	123.186	-5.25354	98.8817	1.1809e-05	0.999988	0.00375896	0.996241
	0.5	84	13	50.1098	8.04136	0.905329	64.4708	1.80936	18.6457	-13.4009	129.481	0.998803	0.00119675	0.939991	0.0600088
	0.5	84	14	58.6513	0.605741	-0.217713	108.306	2.03465	55.3467	-15.3249	110.487	0.00167126	0.998329	0.833378	0.166622
	0.5	84	15	59.4738	0.522382	-0.282011	128.343	2.10837	63.2476	-25.6168	198.567	0.0005103	0.99949	0.995947	0.00405331
	0.5	85	1	0.105588	0.383451	-0.41629	114.792	2.05991	37.1127	-8.32823	127.378	0.000291407	0.999709	0.885985	0.114015
	0.5	85	2	6.81876	0.227848	-0.642355	235.294	2.37161	171.619	-5.06635	116.68	1.75518e-06	0.999998	2.12364e-05	0.999979
	0.5	85	3	7.36893	0.238962	-0.621671	242.009	2.38383	210.761	6.04387	43.964	1.77421e-06	0.999998	2.76675e-09	1
	0.5	85	4	20.1284	0.316764	-0.499264	171.825	2.23509	111.193	-3.54247	101.394	2.53895e-05	0.999975	0.0144666	0.985533
	0.5	85	5	23.5517	0.327878	-0.484287	145.061	2.16155	114.765	-0.296961	106.971	6.27834e-05	0.999937	0.018585	0.981415
	0.5	85	6	24.363	0.28342	-0.547569	166.881	2.22241	148.406	-3.29061	33.3204	2.03579e-05	0.99998	3.33944e-05	0.999967
	0.5	85	7	26.4359	0.277863	-0.556169	168.651	2.22699	134.163	-1.47452	44.5184	1.81627e-05	0.999982	0.000209667	0.99979
	0.5	85	8	33.6492	0.300092	-0.522746	122.182	2.08701	80.9166	-12.7838	116.058	0.000105835	0.999894	0.359927	0.640073
	0.5	85	9	37.9061	0.6891	-0.161718	58.4899	1.76708	36.2642	-22.1333	150.535	0.0219292	0.978071	0.991715	0.00828476
	0.5	85	10	39.1787	0.127817	-0.893411	132.464	2.1221	84.1816	1.06258	102.378	8.38437e-06	0.999992	0.194866	0.805134
	0.5	85	11	39.5621	20.434	1.31035	61.4959	1.78885	16.1961	-19.2551	227.218	0.999996	3.67494e-06	0.999029	0.000970788
	0.5	86	1	1.93948	0.277863	-0.556169	172.296	2.23627	134.748	-3.63001	71.5491	1.63597e-05	0.999984	0.000397468	0.999603
	0.5	86	2	8.81381	0.255634	-0.592381	178.209	2.25093	110.847	-12.2226	159.036	1.06375e-05	0.999989	0.17396	0.82604
	0.5	86	3	12.5928	0.22229	-0.653079	207.67	2.31737	176.34	2.70816	59.2932	3.13086e-06	0.999997	1.12769e-06	0.999999
	0.5	86	4	20.1895	0.300092	-0.522746	164.121	2.21517	101.648	-9.52827	98.3945	2.64801e-05	0.999974	0.0408313	0.959169
	0.5	86	5	22.468	0.177832	-0.749989	177.501	2.2492	145.12	-1.40303	55.7879	3.74069e-06	0.999996	6.64158e-05	0.999934
	0.5	86	6	25.1966	0.539054	-0.268368	118.505	2.07374	38.4096	-8.58752	190.359	0.000784138	0.999216	0.991051	0.00894904
	0.5	86	7	26.3859	0.861375	-0.0648076	79.2284	1.89888	26.9523	-18.7397	139.298	0.0171144	0.982886	0.980735	0.0192648
	0.5	86	8	27.7974	0.744673	-0.128034	74.434	1.87177	44.2452	-17.1242	154.073	0.012761	0.987239	0.957962	0.042038
	0.5	86	9	31.7431	0.605741	-0.217713	103.774	2.01609	42.266	-6.86158	182.043	0.00196312	0.998037	0.986365	0.0136353
	0.5	86	10	36.6223	0.661314	-0.179592	71.8683	1.85654	21.4894	-14.675	175.775	0.00978981	0.99021	0.983567	0.0164334
	0.5	86	11	40.1179	0.483482	-0.31562	88.4746	1.94682	40.476	-24.1892	173.03	0.00173049	0.99827	0.996056	0.00394407
	0.5	86	12	47.02	12.9762	1.11315	57.1021	1.75665	14.2312	-25.15	244.509	0.999933	6.71784e-05	0.999802	0.000198371
	0.5	87	1	7.3856	0.188947	-0.72366	232.955	2.36727	211.708	-10.3496	83.8937	1.01739e-06	0.999999	8.66567e-09	1
	0.5	87	2	8.70823	0.22229	-0.653079	228.838	2.35953	188.126	-6.73254	56.9171	1.87596e-06	0.999998	1.68006e-07	1
	0.5	87	3	10.72	0.255634	-0.592381	185.573	2.26852	155.615	-14.7877	115.052	8.6815e-06	0.999991	0.000328668	0.999671
	0.5	87	4	11.3201	0.216733	-0.664075	200.14	2.30133	173.016	5.80347	59.3551	3.51263e-06	0.999996	3.11865e-06	0.999997
	0.5	87	5	19.6171	0.238962	-0.621671	183.512	2.26367	157.457	4.47643	11.648	7.43648e-06	0.999993	4.47268e-06	0.999996
	0.5	87	6	25.2966	0.266748	-0.573898	187.07	2.272	110.476	-7.4842	153.097	9.55672e-06	0.99999	0.154621	0.845379
	0.5	87	7	39.8011	20.1951	1.30525	52.6837	1.72168	7.33077	-22.9407	186.939	0.999996	4.18979e-06	0.997752	0.0022481
	5	88	1	9.08038	1.34483	0.128667	68.8546	1.83793	34.8355	-20.732	175.926	0.121504	0.878496	0.99154	0.00845986
	5	88	2	16.1435	0.188943	-0.723669	178.326	2.25122	141.817	-12.2899	109.454	4.3174e-06	0.999996	0.00108096	0.998919
	5	88	3	18.6053	0.494586	-0.305758	105.963	2.02515	51.684	-3.18043	191.385	0.000913753	0.999086	0.996255	0.00374465
	5	88	4	24.1403	21.6284	1.33502	44.9877	1.65309	6.37129	-19.5699	224.824	0.999997	2.9025e-06	0.998934	0.00106594
	5	88	5	46.4466	13.5483	1.13189	29.9742	1.47675	10.7785	-6.16983	206.876	0.999945	5.53467e-05	0.998807	0.00119258
	5	89	1	0.733544	0.583501	-0.233959	75.5619	1.8783	25.0793	-9.01578	157.458	0.00556341	0.994437	0.955891	0.044109
	5	89	2	2.37846	0.655744	-0.183266	80.3275	1.90486	28.7244	-20.2689	159.688	0.00648853	0.993511	0.989201	0.010799
	5	89	3	3.40653	0.516815	-0.286665	100.63	2.00273	46.3065	-22.7843	173.126	0.00129356	0.998706	0.992262	0.00773771
	5	89	4	4.66245	0.989172	-0.00472799	75.2394	1.87645	17.3964	-32.0425	226.093	0.0326234	0.967377	0.999948	5.15179e-05
	5	89	5	8.92478	0.516815	-0.286665	63.2505	1.80106	12.3377	-17.749	200.249	0.00739641	0.992604	0.995884	0.00411622
	5	89	6	10.7531	0.589058	-0.229842	59.0641	1.77132	18.6036	-33.4814	224.871	0.0135303	0.98647	0.999971	2.86559e-05
	5	89	7	11.6811	0.872472	-0.0592483	57.9361	1.76295	27.6783	-26.9726	216.313	0.0460415	0.953958	0.99954	0.000460369
	5	89	8	14.8209	0.544601	-0.263922	75.7001	1.8791	24.161	-36.679	225.671	0.004479	0.995521	0.999994	6.44193e-06
	5	89	9	19.1722	0.4668	-0.330869	63.019	1.79947	30.2525	-29.7206	196.225	0.0056921	0.994308	0.999737	0.000263051
	5	89	10	20.2225	0.816901	-0.0878307	65.096	1.81355	31.3227	-27.5816	213.024	0.0264429	0.973557	0.999547	0.00045253
	5	89	11	23.2178	0.444572	-0.352058	94.8042	1.97683	35.0841	-36.9537	252.928	0.00101861	0.998981	0.999995	4.88561e-06
	5	89	12	31.7091	28.2859	1.45157	47.4125	1.67589	10.4415	-19.8667	244.026	1	4.80914e-07	0.999661	0.000339333
	5	90	1	0	0.405672	-0.391825	136.112	2.1339	40.766	1.04362	140.458	0.000167106	0.999833	0.94349	0.0565098
	5	90	2	2.81747	0.3501	-0.455807	138.669	2.14198	44.3994	-15.4405	268.045	9.50713e-05	0.999905	0.999956	4.43747e-05
	5	90	3	6.60745	0.3112	-0.50696	152.03	2.18193	48.5937	-18.9065	311.046	4.27512e-05	0.999957	0.999999	9.45592e-07
	5	90	4	9.00258	0.222286	-0.653088	178.172	2.25084	92.0576	-13.1074	186.144	6.94491e-06	0.999993	0.819662	0.180338
	5	90	5	18.1774	0.227843	-0.642364	190.136	2.27906	155.76	-1.99242	96.5097	5.3519e-06	0.999995	8.0081e-05	0.99992
	5	90	6	19.3778	0.216729	-0.664083	211.344	2.32499	135.576	-4.05306	130.52	2.63621e-06	0.999997	0.00525592	0.994744
	5	90	7	24.9627	5.64606	0.751746	33.314	1.52263	8.97693	-8.22711	183.384	0.995313	0.00468674	0.990865	0.00913525
	5	90	8	39.7058	20.2891	1.30726	56.9027	1.75513	6.74748	-30.7083	270.012	0.999996	3.95114e-06	0.999982	1.8207e-05
	5	91	1	4.34569	0.161157	-0.79275	285.205	2.45516	256.735	-2.53935	91.3595	1.98006e-07	1	1.45504e-12	1
	5	91	2	7.57439	0.138929	-0.857208	243.711	2.38688	219.57	-7.46317	66.4403	3.17421e-07	1	8.23892e-10	1
	5	91	3	9.76947	0.1945	-0.71108	234.399	2.36996	219.225	-11.2425	72.9941	1.07641e-06	0.999999	1.86747e-09	1
	5	91	4	10.3419	0.200057	-0.698845	195.673	2.29153	155.225	-11.0161	85.7561	3.10656e-06	0.999997	8.79267e-05	0.999912
	5	91	5	22.3342	3.42876	0.535137	48.1693	1.68277	17.025	-22.0143	197.466	0.936008	0.0639922	0.99758	0.00241961
	5	91	6	26.5965	0.633515	-0.198243	66.2486	1.82118	24.3186	-20.3197	180.896	0.0113169	0.988683	0.993698	0.0063022
	5	91	7	28.2914	0.800229	-0.0967855	64.8015	1.81158	27.0228	-33.111	222.522	0.0251036	0.974896	0.999959	4.07261e-05
	5	91	8	30.1142	29.8808	1.47539	48.8887	1.68921	6.20633	-25.042	249.684	1	3.23188e-07	0.999844	0.000155715
	6	92	1	10.4532	0.188947	-0.72366	224.018	2.35028	151.994	-1.18365	106.558	1.26054e-06	0.999999	0.000253195	0.999747
	6	92	2	12.1037	0.583512	-0.23395	85.2307	1.9306	40.3525	-9.1811	219.915	0.00359544	0.996405	0.998965	0.00103499
	6	92	3	12.9929	0.511268	-0.291351	84.6807	1.92778	61.4894	-23.1697	165.919	0.00243144	0.997569	0.984187	0.0158128
	6	92	4	14.3766	0.611299	-0.213747	82.5623	1.91678	46.8501	-23.2649	186.965	0.00468763	0.995312	0.994871	0.00512905
	6	92	5	29.1812	30.815	1.48876	35.3201	1.54802	6.37358	-8.66432	236.204	1	3.60271e-07	0.999824	0.000175969
	6	93	1	4.08459	0.272306	-0.564943	165.317	2.21832	128.726	-4.5177	177.278	1.87937e-05	0.999981	0.264732	0.735268
	6	93	2	6.18523	0.0944734	-1.02469	271.035	2.43303	246.613	-11.226	85.3579	5.94561e-08	1	1.05948e-11	1
	6	93	3	14.5767	10.3587	1.01531	39.2187	1.59349	9.521	-18.5715	226.686	0.999765	0.000234709	0.998982	0.00101816
	6	93	4	36.4612	23.535	1.37171	41.3249	1.61621	11.6916	-8.20361	171.25	0.999998	1.78377e-06	0.981639	0.0183608
	6	94	1	1.2615	0.461253	-0.336061	99.1089	1.99611	68.9838	-8.87841	90.2699	0.00095466	0.999045	0.314857	0.685143
	6	94	2	3.05649	1.03921	0.0167023	131.105	2.11762	44.7431	-5.8773	84.0524	0.0069569	0.993043	0.537985	0.462015
	6	94	3	9.35287	1.47267	0.168107	56.9384	1.75541	23.4195	-22.4651	279.824	0.241473	0.758527	0.999975	2.48574e-05
	6	94	4	19.6116	22.6069	1.35424	46.0272	1.66301	9.88081	-4.29778	168.724	0.999998	2.15537e-06	0.987069	0.0129311
	6	94	5	43.6634	16.3328	1.21306	48.4924	1.68567	6.80105	-20.0074	215.11	0.999984	1.64707e-05	0.99836	0.00163973
	1	95	1	0.627958	0.338986	-0.469818	133.776	2.12638	69.754	-14.5294	169.605	0.000100997	0.999899	0.887297	0.112703
	1	95	2	1.42263	0.211172	-0.675364	163.174	2.21265	100.789	-11.3985	134.747	9.41299e-06	0.999991	0.140233	0.859767
	1	95	3	3.72885	0.205614	-0.686946	238.473	2.37744	192.951	-17.3459	177	1.16903e-06	0.999999	3.28568e-05	0.999967
	1	95	4	5.42933	0.444572	-0.352058	101.527	2.00658	61.7064	-20.4299	233.465	0.000771775	0.999228	0.998215	0.00178502
	1	95	5	8.10232	0.450129	-0.346663	138.829	2.14248	44.2261	-26.8222	228.328	0.000218654	0.999781	0.999515	0.000485401
	1	95	6	13.4705	0.2723	-0.564952	137.538	2.13842	83.0825	-14.0802	111.668	4.57532e-05	0.999954	0.367394	0.632606
	1	95	7	18.6942	41.3007	1.61596	54.3274	1.73502	9.6399	-18.9301	212.156	1	2.96676e-08	0.997883	0.00211694
	1	96	1	9.09705	0.216729	-0.664083	145.184	2.16192	124.714	4.6239	73.1478	1.83744e-05	0.999982	0.0025587	0.997441
	1	96	2	9.9084	0.355658	-0.448968	131.974	2.12049	108.415	-3.20798	36.3854	0.000124855	0.999875	0.00441243	0.995588
	1	96	3	32.8928	27.1022	1.433	37.9497	1.57921	10.8004	-10.8913	87.9933	0.999999	7.7131e-07	0.902807	0.097193
	1	97	1	5.06812	0.177829	-0.749998	270.613	2.43235	240.105	-1.37927	46.4227	3.65061e-07	1	5.00538e-12	1
	1	97	2	13.0148	0.161157	-0.79275	226.312	2.35471	204.719	-2.31654	58.0162	7.4211e-07	0.999999	7.1977e-09	1
	1	97	3	18.9499	0.222286	-0.653088	177.973	2.25035	147.405	-6.75133	62.2026	6.98515e-06	0.999993	8.544e-05	0.999915
	1	97	4	32.0536	27.13	1.43345	51.2096	1.70935	12.1593	-34.1977	253.635	0.999999	6.00972e-07	0.999989	1.1065e-05
	1	97	5	59.6115	0.383443	-0.416299	116.183	2.06514	51.3084	10.9594	8.22969	0.000276651	0.999723	0.262068	0.737932
	1	98	1	2.96196	0.1167	-0.932929	158.017	2.19871	122.181	-19.918	153.866	2.54397e-06	0.999997	0.135566	0.864434
	1	98	2	3.27872	0.1556	-0.80799	234.369	2.3699	198.528	-14.7088	107.642	5.4977e-07	0.999999	3.78063e-07	1
	1	98	3	5.77388	0.822458	-0.0848863	83.735	1.92291	42.1132	-28.6159	211.749	0.0121772	0.987823	0.999549	0.000450732
	1	98	4	7.64108	1.38929	0.142792	143.782	2.15771	54.7258	-31.8967	220.073	0.0189121	0.981088	0.999824	0.000176153
	1	98	5	9.28044	0.127814	-0.89342	219.726	2.34188	205.734	-7.66235	59.7858	4.6435e-07	1	9.41338e-09	1
	1	98	6	9.80837	0.200057	-0.698845	219.418	2.34127	188.758	-4.28432	76.8155	1.68171e-06	0.999998	2.26278e-07	1
	1	98	7	10.1974	0.477915	-0.32065	226.951	2.35593	180.676	-4.19019	62.9096	3.20053e-05	0.999968	5.15307e-07	0.999999
	1	98	8	12.5147	0.250072	-0.601935	195.654	2.29149	126.275	7.68482	22.1673	6.19298e-06	0.999994	0.000439826	0.99956
	1	98	9	15.0043	0.250072	-0.601935	192.359	2.28411	163.272	-4.66004	53.0042	6.75106e-06	0.999993	6.07375e-06	0.999994
	1	98	10	32.2537	0.344543	-0.462756	149.507	2.17466	85.068	-11.0451	97.77	6.41081e-05	0.999936	0.18243	0.81757
	1	98	11	34.6155	0.216729	-0.664083	192.908	2.28535	152.411	0.285962	66.9283	4.25967e-06	0.999996	3.84214e-05	0.999962
	1	98	12	39.4502	0.250072	-0.601935	185.181	2.2676	140.138	-10.5586	108.104	8.18492e-06	0.999992	0.00101246	0.998988
	1	98	13	42.6845	17.3105	1.23831	58.8757	1.76994	18.7818	-32.0354	274.006	0.999989	1.10122e-05	0.999989	1.07307e-05
	10	99	1	18.6224	8.24697	0.916295	38.1092	1.58103	12.278	-19.5795	176.784	0.999216	0.000784357	0.993243	0.00675654
	10	99	2	27.2028	20.2395	1.3062	35.7404	1.55316	0.327666	-12.1231	191.831	0.999995	5.03065e-06	0.992536	0.00746439
	10	99	3	48.9317	11.0645	1.04393	30.7231	1.48746	5.18514	-19.0843	189.849	0.999837	0.000163377	0.995076	0.00492438
	10	100	1	0	0.272306	-0.564943	97.2124	1.98772	83.4435	-3.144	27.0289	0.000231751	0.999768	0.589303	0.410697
	10	100	2	6.88545	12.5928	1.10012	49.17	1.6917	11.511	-29.3399	253.133	0.999921	7.92195e-05	0.999946	5.43611e-05
	10	100	3	24.3464	4.60141	0.662891	56.4541	1.7517	19.5875	-22.1319	175.986	0.9795	0.0205003	0.995968	0.00403236
	10	100	4	36.5946	23.4016	1.36925	43.0791	1.63427	8.8151	-26.6735	243.217	0.999998	1.7982e-06	0.999844	0.00015567
	10	101	1	0	0.0555726	-1.25514	115.618	2.06303	88.8397	11.0064	20.0381	5.14017e-06	0.999995	0.493031	0.506969
	10	101	2	0.633528	0.616856	-0.209816	78.7404	1.8962	36.7854	-13.949	121.805	0.00571586	0.994284	0.901994	0.0980063
	10	101	3	2.94535	0.539054	-0.268368	81.4112	1.91068	52.8479	-9.18193	76.9456	0.00331861	0.996681	0.550971	0.449029
	10	101	4	19.456	40.5402	1.60789	42.3686	1.62704	8.61256	-4.10389	156.579	1	4.56228e-08	0.974429	0.0255705
	10	102	1	1.32263	0.322321	-0.491711	131.914	2.12029	101.837	-15.0694	107.356	9.21125e-05	0.999908	0.124269	0.875731
	10	102	2	9.85858	0.75023	-0.124806	90.7433	1.95781	47.3171	-13.8568	189.913	0.00672537	0.993275	0.983169	0.0168308
	10	102	3	12.6261	0.444581	-0.352049	112.972	2.05297	54.9125	-22.557	196.583	0.000497867	0.999502	0.993627	0.00637278
	10	102	4	21.0842	0.216733	-0.664075	168.037	2.22541	102.033	-8.18338	71.0598	8.71708e-06	0.999991	0.0219168	0.978083
	10	102	5	33.5936	0.461253	-0.336061	92.9255	1.96813	62.9663	-10.2736	132.767	0.00123503	0.998765	0.669547	0.330453
	10	102	6	46.731	13.2652	1.12271	34.4924	1.53772	10.4298	-12.2383	121.05	0.99994	6.00436e-05	0.930478	0.0695225
	2	103	1	0.133372	0.483472	-0.315629	109.659	2.04005	79.0878	-10.2713	108.708	0.000739155	0.999261	0.665114	0.334886
	2	103	2	3.99003	0.633515	-0.198243	106.643	2.02793	41.9991	-7.11954	187.404	0.00207477	0.997925	0.99034	0.00966045
	2	103	3	11.6033	0.894701	-0.0483221	70.242	1.8466	36.4372	-18.1152	146.359	0.0282999	0.9717	0.971015	0.0289851
	2	103	4	14.1985	0.950272	-0.0221519	94.1861	1.97399	41.6939	-27.8601	204.428	0.0141571	0.985843	0.999318	0.000681956
	2	103	5	15.4544	16.2547	1.21098	51.9422	1.71552	11.4485	-32.9667	279.307	0.999983	1.67496e-05	0.999994	6.36945e-06
	2	103	6	32.8983	0.883587	-0.0537509	62.6773	1.79711	23.6491	-17.5644	131.125	0.0381252	0.961875	0.974458	0.0255423
	2	103	7	34.1987	0.705758	-0.151344	84.5174	1.92695	45.4648	-2.80612	80.8775	0.00694726	0.993053	0.466227	0.533773
	2	103	8	35.3657	0.533486	-0.272877	76.066	1.88119	44.6564	-21.8882	140.054	0.00413595	0.995864	0.987045	0.0129545
	2	103	9	37.2829	0.966944	-0.0145987	108.63	2.03595	33.6504	-21.3919	146.418	0.00957394	0.990426	0.990084	0.00991625
	2	103	10	39.8336	14.6097	1.16464	47.9076	1.6804	10.536	-13.9793	173.704	0.999967	3.2607e-05	0.983568	0.0164324
	2	103	11	57.1386	0.928044	-0.0324315	65.7931	1.81818	34.8732	-21.2241	139.359	0.0388316	0.961168	0.988917	0.0110828
	2	103	12	59.0614	0.933601	-0.0298387	47.6451	1.67802	28.6172	-21.1011	153.932	0.095795	0.904205	0.991066	0.0089335
	2	104	1	0	0.166714	-0.778027	138.455	2.14131	98.7797	-7.41731	60.9876	1.19633e-05	0.999988	0.330678	0.669322
	2	104	2	14.3986	1.4393	0.158152	72.7255	1.86169	32.1576	-11.0316	200.114	0.13537	0.86463	0.994652	0.00534838
	2	104	3	16.8159	13.5094	1.13064	44.4731	1.6481	11.4485	-18.0897	187.479	0.999948	5.2321e-05	0.993552	0.00644805
	2	104	4	30.6643	0.244515	-0.611695	142.161	2.15278	77.8884	-10.5902	153.808	2.85761e-05	0.999971	0.664815	0.335185
	2	104	5	31.3034	0.605729	-0.217721	74.7679	1.87371	22.8855	-29.6751	205.461	0.00648492	0.993515	0.999796	0.000203904
	2	104	6	32.5538	0.905815	-0.0429604	81.1059	1.90905	39.5658	-16.5331	169.212	0.0189968	0.981003	0.973778	0.0262216
	2	104	7	34.3876	0.516815	-0.286665	61.0453	1.78565	31.3158	-22.4675	143.843	0.00840077	0.991599	0.993814	0.00618639
	2	104	8	35.7214	0.766886	-0.115269	60.7066	1.78324	29.6206	-24.5419	169.386	0.0268952	0.973105	0.997478	0.00252161
	2	104	9	41.6619	1.75606	0.244539	49.7494	1.69679	19.8121	-22.8314	196.862	0.45938	0.54062	0.997882	0.00211819
	2	104	10	45.7631	14.2319	1.15326	34.4977	1.53779	10.5313	-25.4581	204.098	0.99996	4.04146e-05	0.999224	0.00077645
	1	105	1	0	0.34455	-0.462748	147.959	2.17014	118.786	6.05942	8.02354	6.72407e-05	0.999933	0.0175727	0.982427
	1	105	2	11.3035	0.300092	-0.522746	173.268	2.23872	140.204	-2.93099	68.0336	2.04098e-05	0.99998	0.00018026	0.99982
	1	105	3	12.8706	1.65051	0.217617	68.0231	1.83266	33.7936	-15.2709	178.493	0.244171	0.755829	0.981786	0.0182142
	1	105	4	16.1772	0.52794	-0.277416	96.5192	1.98461	19.7765	4.53245	150.15	0.00162998	0.99837	0.99519	0.0048101
	1	105	5	18.828	0.255634	-0.592381	170.927	2.23281	153.351	1.05852	49.0078	1.3101e-05	0.999987	1.85794e-05	0.999981
	1	105	6	22.3124	0.288978	-0.539136	176.588	2.24696	166.209	-2.89049	31.2578	1.64601e-05	0.999984	2.3334e-06	0.999998
	1	105	7	22.9682	0.472367	-0.32572	156.47	2.19443	82.9899	-4.09284	111.111	0.000155913	0.999844	0.188769	0.811231
	1	105	8	31.4985	2.68971	0.429706	49.7392	1.6967	14.6621	-2.75732	172.173	0.827168	0.172832	0.992309	0.00769126
	1	105	9	35.7888	21.4177	1.33077	49.1322	1.69137	8.22745	10.4799	116.967	0.999997	2.95153e-06	0.994498	0.00550174
	1	106	1	2.90645	0.46681	-0.33086	96.3573	1.98388	51.0343	-2.87492	92.8114	0.00110926	0.998891	0.470649	0.529351
	1	106	2	4.12349	0.922505	-0.0350312	72.7927	1.86209	20.9877	7.18718	72.2463	0.0282129	0.971787	0.800115	0.199885
	1	106	3	5.82401	0.483482	-0.31562	87.2156	1.94059	58.9017	-4.51371	78.7286	0.00182973	0.99817	0.309647	0.690353
	1	106	4	7.91354	1.50046	0.176224	86.54	1.93722	36.1106	-9.67765	81.07	0.104947	0.895053	0.758683	0.241317
	1	106	5	10.3921	6.99103	0.844541	45.9111	1.66192	12.1077	6.82067	112.051	0.997964	0.00203587	0.969995	0.0300053
	1	106	6	18.4612	0.522382	-0.282011	62.3886	1.79511	29.5298	-9.17419	126.492	0.00800265	0.991997	0.865064	0.134936
	1	106	7	35.7165	0.266748	-0.573898	129.03	2.11069	51.1119	0.725641	104.818	5.84814e-05	0.999942	0.645849	0.354151
	1	106	8	49.1929	10.8033	1.03356	47.5672	1.67731	12.4539	-7.99818	119.875	0.999808	0.000192154	0.880901	0.119099
	1	107	1	1.74498	0.522382	-0.282011	105.555	2.02348	64.3137	-0.806331	66.2483	0.00111157	0.998888	0.180464	0.819536
	1	107	2	9.42511	1.31151	0.117773	62.5756	1.7964	19.3748	-16.1272	113.984	0.139276	0.860724	0.965599	0.0344009
	1	107	3	11.159	0.294535	-0.530863	166.523	2.22147	100.047	-2.21463	112.685	2.32572e-05	0.999977	0.0706213	0.929379
	1	107	4	14.1432	3.5622	0.551719	48.2874	1.68383	14.509	-17.7598	181.188	0.945432	0.0545685	0.991406	0.00859356
	1	107	5	18.2834	4.76813	0.678348	46.2527	1.66514	8.2963	-1.81419	113.321	0.986214	0.0137864	0.868592	0.131408
	1	107	6	24.6242	2.95646	0.470772	58.9749	1.77067	17.5167	-21.9851	148.313	0.844202	0.155798	0.994932	0.00506841
	1	107	7	28.7366	31.2596	1.49498	42.471	1.62809	10.0959	-22.5224	153.902	1	2.70881e-07	0.996372	0.00362807
	1	108	1	0	0.12226	-0.912717	172.251	2.23616	132.551	4.95792	49.6591	1.71665e-06	0.999998	0.00615406	0.993846
	1	108	2	2.523	0.350107	-0.455799	138.654	2.14193	90.5072	-3.81191	39.8235	9.51235e-05	0.999905	0.0276347	0.972365
	1	108	3	5.34053	0.439024	-0.357512	96.2162	1.98325	37.7444	-3.69861	131.08	0.000923514	0.999076	0.861371	0.138629
	1	108	4	6.94657	0.244519	-0.611687	189.093	2.27668	129.207	-14.6267	151.541	6.85911e-06	0.999993	0.0270812	0.972919
	1	108	5	10.9033	0.305649	-0.514777	162.171	2.20997	122.914	-1.09218	31.3268	2.97397e-05	0.99997	0.000668656	0.999331
	1	108	6	11.5702	2.06174	0.314235	169.478	2.22911	72.4529	-10.5716	151.557	0.0793024	0.920698	0.713866	0.286134
	1	108	7	13.882	2.26736	0.355521	63.4479	1.80242	22.4093	2.99388	170.61	0.590989	0.409011	0.998435	0.00156531
	1	108	8	17.3164	0.93362	-0.02983	67.4564	1.82902	35.3194	-11.9347	94.2789	0.0368312	0.963169	0.843242	0.156758
	1	108	9	33.7993	0.494596	-0.305749	191.676	2.28257	71.2961	-2.5069	137.468	7.73704e-05	0.999923	0.694063	0.305937
	1	108	10	49.8431	10.1531	1.0066	47.084	1.67287	13.208	-18.4292	161.403	0.999727	0.000272595	0.987912	0.0120881
	0	109	1	4.19009	0.183386	-0.736634	216.576	2.33561	193.818	-2.47144	53.102	1.38569e-06	0.999999	4.09959e-08	1
	0	109	2	10.1362	0.127814	-0.89342	181.752	2.25948	136.736	-8.5112	114.119	1.39923e-06	0.999999	0.00160891	0.998391
	0	109	3	10.6364	0.594615	-0.225764	199.697	2.30037	131.237	-6.49196	88.2086	0.000136541	0.999863	0.00111687	0.998883
	0	109	4	12.248	0.316757	-0.499273	173.054	2.23818	100.302	1.39236	101.955	2.45414e-05	0.999975	0.0657208	0.934279
	0	109	5	36.1159	0.216729	-0.664083	198.561	2.29789	179.578	1.13949	21.3317	3.66156e-06	0.999996	1.79595e-07	1
	0	109	6	38.2888	0.3112	-0.50696	153.53	2.18619	103.446	-4.34824	46.7577	4.08221e-05	0.999959	0.00895107	0.991049
	0	109	7	42.59	0.3112	-0.50696	158.665	2.20048	136.948	-0.346588	23.6334	3.49563e-05	0.999965	0.000103926	0.999896
	0	109	8	48.814	0.3112	-0.50696	163.598	2.21378	146.686	2.30443	8.7356	3.02392e-05	0.99997	2.06088e-05	0.999979
	0	109	9	52.5484	0.355658	-0.448968	144.533	2.15997	118.05	1.8849	52.4955	8.29466e-05	0.999917	0.0016266	0.998373
	0	109	10	53.9099	0.305643	-0.514785	153.686	2.18663	138.415	-1.81133	30.9287	3.83687e-05	0.999962	0.000105089	0.999895
	0	110	1	4.45683	0.205614	-0.686946	127.248	2.10465	88.665	-5.54533	133.207	3.11016e-05	0.999969	0.285092	0.714908
	0	110	2	10.7809	0.700201	-0.154777	165.165	2.21792	63.0722	-7.15554	138.225	0.000577076	0.999423	0.70254	0.29746
	0	110	3	11.7256	0.216729	-0.664083	215.122	2.33269	158.352	-2.32351	73.0357	2.40032e-06	0.999998	1.93688e-05	0.999981
	0	110	4	14.0707	0.166714	-0.778027	227.488	2.35696	210.383	-1.69402	62.7302	7.95677e-07	0.999999	3.1493e-09	1
	0	110	5	15.5044	0.277857	-0.556178	156.117	2.19345	95.8644	-10.0419	110.067	2.64326e-05	0.999974	0.0906473	0.909353
	0	110	6	16.827	0.316757	-0.499273	168.243	2.22594	138.021	-0.886848	45.2442	2.8059e-05	0.999972	0.000127536	0.999872
	0	110	7	17.5661	0.2334	-0.631899	195.006	2.29005	160.546	1.5641	40.1004	5.06175e-06	0.999995	5.24675e-06	0.999995
	0	110	8	18.1774	0.211172	-0.675364	177.112	2.24825	133.746	-12.298	97.7667	6.15621e-06	0.999994	0.00221306	0.997787
	0	110	9	19.1166	0.238957	-0.62168	160.483	2.20543	78.6144	-3.99708	111.638	1.46455e-05	0.999985	0.24545	0.75455
	0	110	10	20.2058	0.716872	-0.144558	153.863	2.18713	77.6772	-3.13011	88.3615	0.000834832	0.999165	0.134251	0.865749
	0	110	11	21.9007	0.327872	-0.484296	152.498	2.18326	90.47	-1.08779	81.8096	4.98057e-05	0.99995	0.0469919	0.953008
	0	110	12	24.018	1.0892	0.0371081	111.79	2.0484	60.1333	-2.50536	76.2231	0.0141533	0.985847	0.264567	0.735433
	0	110	13	31.3479	0.1945	-0.71108	218.777	2.34	206.571	4.57064	13.3131	1.5667e-06	0.999998	1.40186e-09	1
	0	110	14	49.8254	0.2334	-0.631899	196.279	2.29287	181.213	3.27648	15.0318	4.89461e-06	0.999995	1.17923e-07	1
	0	110	15	57.522	0.2723	-0.564952	193.55	2.28679	155.073	-3.25575	55.4417	8.6234e-06	0.999991	1.84258e-05	0.999982
	0	110	16	58.9836	0.338986	-0.469818	167.394	2.22374	135.222	-2.76266	44.3676	3.60225e-05	0.999964	0.000201642	0.999798
	0	111	1	6.84085	0.361215	-0.442235	151.74	2.1811	107.021	2.98632	78.8765	7.00145e-05	0.99993	0.0150935	0.984906
	0	111	2	9.38602	0.127814	-0.89342	134.327	2.12816	73.6338	-23.2233	177.396	7.75673e-06	0.999992	0.974998	0.0250018
	0	111	3	23.2789	0.716872	-0.144558	171.875	2.23521	113.688	2.74543	75.0211	0.00054519	0.999455	0.00643708	0.993563
	0	111	4	24.3459	0.288972	-0.539145	175.642	2.24463	135.719	-0.838397	90.4708	1.68951e-05	0.999983	0.000798169	0.999202
	0	111	5	47.6414	0.672415	-0.172363	191.421	2.28199	114.03	-1.96899	103.168	0.000272012	0.999728	0.0133358	0.986664
	0	111	6	48.6084	0.238957	-0.62168	219.914	2.34225	188.359	4.52309	32.603	2.92824e-06	0.999997	6.53227e-08	1
	0	111	7	53.3931	0.316757	-0.499273	113.094	2.05344	74.9654	2.31062	73.2858	0.000175897	0.999824	0.132766	0.867234
	0	111	8	54.7212	0.277857	-0.556178	167.198	2.22323	143.859	-2.54579	37.4793	1.8945e-05	0.999981	5.9094e-05	0.999941
	0	111	9	55.4603	0.377886	-0.422639	161.937	2.20935	135.152	-1.83582	43.4914	6.074e-05	0.999939	0.000186401	0.999814
	0	112	1	11.2088	0.288972	-0.539145	195.258	2.29061	138.305	6.86004	75.2796	1.00583e-05	0.99999	0.00104234	0.998958
	0	112	2	20.7282	0.4668	-0.330869	106.504	2.02737	58.2128	-12.0846	97.815	0.000741832	0.999258	0.640596	0.359404
	0	112	3	30.1086	0.383443	-0.416299	161.498	2.20817	128.103	1.45176	29.0348	6.46688e-05	0.999935	0.000302872	0.999697
	0	112	4	32.1592	0.216729	-0.664083	151.315	2.17988	131.875	0.48592	37.6857	1.48988e-05	0.999985	0.000227166	0.999773
	0	112	5	34.3487	0.222286	-0.653088	164.446	2.21602	120.975	-5.55229	51.1837	1.04781e-05	0.99999	0.00168366	0.998316
	0	112	6	35.0712	0.283415	-0.547578	140.354	2.14722	104.702	-0.163358	61.9146	4.67543e-05	0.999953	0.00770495	0.992295
	0	112	7	36.2326	0.294529	-0.530872	156.305	2.19397	127.248	0.281446	31.5926	3.1505e-05	0.999968	0.000363966	0.999636
	0	112	8	37.4552	0.288972	-0.539145	148.118	2.17061	127.919	-0.0937299	37.2176	3.83819e-05	0.999962	0.000371013	0.999629
	0	112	9	45.124	0.277857	-0.556178	181.878	2.25978	146.603	3.7764	21.879	1.25392e-05	0.999987	2.48806e-05	0.999975
	0	112	10	46.291	0.300086	-0.522754	200.415	2.30193	159.266	0.961072	49.489	1.00573e-05	0.99999	8.22946e-06	0.999992
	0	112	11	47.9471	0.383443	-0.416299	173.7	2.2398	96.0172	5.14265	59.0554	4.6474e-05	0.999954	0.0239465	0.976053
	0	112	12	48.8473	0.333429	-0.476997	182.029	2.26014	145.216	5.01863	11.7797	2.29628e-05	0.999977	2.54398e-05	0.999975
	0	112	13	50.22	0.433458	-0.363053	100.603	2.00261	69.5572	-0.145624	83.0663	0.00074062	0.999259	0.201082	0.798918
	0	112	14	54.0488	0.211172	-0.675364	217.922	2.3383	169.675	-4.63807	105.049	2.06488e-06	0.999998	1.51341e-05	0.999985
	0	112	15	54.5212	0.238957	-0.62168	232.143	2.36576	199.003	1.37074	78.2158	2.20743e-06	0.999998	6.68962e-08	1
	5	113	1	2.29515	0.75023	-0.124806	82.0643	1.91415	31.846	-11.0585	110.618	0.00945773	0.990542	0.847752	0.152248
	5	113	2	26.0747	19.9839	1.30068	49.9867	1.69885	15.8442	-13.2473	195.846	0.999995	4.57885e-06	0.993688	0.00631192
	5	113	3	46.9477	13.0429	1.11537	34.0522	1.53215	10.6827	-24.3247	215.73	0.999934	6.61377e-05	0.999241	0.000758778
	3	114	1	0.400115	0.583501	-0.233959	94.4351	1.97513	56.261	-8.8459	109.36	0.00246025	0.99754	0.576324	0.423676
	3	114	2	2.77857	0.694644	-0.158238	83.1286	1.91975	34.0797	-21.6656	149.912	0.00697191	0.993028	0.990957	0.00904251
	3	114	3	7.76334	0.950272	-0.0221519	59.7721	1.7765	26.4901	-25.4179	162.992	0.055111	0.944889	0.998324	0.00167594
	3	114	4	11.2532	1.10032	0.0415172	54.0252	1.7326	18.434	-21.2141	185.762	0.113262	0.886738	0.995913	0.00408738
	3	114	5	13.8262	2.24509	0.351233	52.4611	1.71984	23.9884	-9.03124	130.642	0.669672	0.330328	0.891901	0.108099
	3	114	6	17.3716	5.70163	0.755999	41.3505	1.61648	11.7142	-15.6878	140.842	0.994741	0.00525913	0.970598	0.0294018
	3	114	7	29.1528	10.8753	1.03644	47.837	1.67976	11.5121	-25.0014	197.992	0.999815	0.000185213	0.998975	0.00102501
	3	114	8	41.0729	18.9221	1.27697	51.4808	1.71165	1.04892	-17.5784	167.548	0.999994	6.42644e-06	0.98845	0.0115495
	3	115	1	8.29127	0.683529	-0.165243	66.1651	1.82063	24.9702	-26.3734	199.379	0.0143242	0.985676	0.999208	0.000792125
	3	115	2	11.131	0.383443	-0.416299	121.316	2.08392	54.8688	-1.18358	157.981	0.000229459	0.999771	0.963831	0.0361691
	3	115	3	13.3927	0.338986	-0.469818	121.639	2.08507	52.2826	-7.44397	146.256	0.000154971	0.999845	0.851206	0.148794
	3	115	4	22.0119	8.31905	0.920074	38.8581	1.58948	7.13859	-23.1535	183.74	0.999245	0.000755071	0.997768	0.00223204
	3	115	5	37.4885	17.4494	1.24178	56.2829	1.75038	5.12664	-23.013	194.864	0.999989	1.05435e-05	0.998158	0.00184249
	3	115	6	58.6668	1.32816	0.12325	51.734	1.71378	17.726	-21.7977	170.029	0.216329	0.783671	0.995301	0.00469904
	3	116	1	2.92862	0.477915	-0.32065	97.0953	1.9872	38.7416	-19.0843	215.888	0.00115834	0.998842	0.997408	0.00259243
	3	116	2	4.34569	0.4668	-0.330869	126.386	2.1017	83.665	0.614757	190.213	0.000367634	0.999632	0.995517	0.00448305
	3	116	3	5.14036	0.300086	-0.522754	141.924	2.15206	95.4127	-26.5906	220.222	5.27317e-05	0.999947	0.989586	0.0104144
	3	116	4	6.34071	0.294529	-0.530872	120.895	2.08241	43.446	-31.9006	255.234	0.000105291	0.999895	0.999961	3.8916e-05
	3	116	5	11.1699	0.216729	-0.664083	196.859	2.29416	178.799	-2.90974	51.8915	3.83067e-06	0.999996	4.79185e-07	1
	3	116	6	12.5091	0.322315	-0.49172	146.358	2.16542	59.4059	-7.32497	198.218	5.70647e-05	0.999943	0.992259	0.00774088
	3	116	7	13.2482	1.78384	0.251357	42.72	1.63063	16.742	-27.7045	214.437	0.554696	0.445304	0.999678	0.000322448
	3	116	8	20.567	0.294529	-0.530872	127.787	2.10649	50.9501	-22.2934	150.006	8.14279e-05	0.999919	0.985402	0.0145978
	3	116	9	23.1011	28.3248	1.45217	48.7886	1.68832	6.74372	-12.815	234.816	1	4.65651e-07	0.999551	0.000448708
	3	116	10	55.3659	4.6291	0.665497	45.2829	1.65593	15.2967	-29.4553	248.304	0.984503	0.0154974	0.999935	6.50235e-05
	3	117	1	2.97863	0.1945	-0.71108	227.878	2.3577	137.12	7.49321	106.627	1.25547e-06	0.999999	0.0142412	0.985759
	3	117	2	3.87333	0.172272	-0.763786	226.551	2.35517	208.689	1.95565	28.4229	8.97018e-07	0.999999	1.35158e-09	1
	3	117	3	7.74667	0.255629	-0.59239	179.957	2.25517	153.439	3.00362	19.8164	1.01292e-05	0.99999	9.14844e-06	0.999991
	3	117	4	8.38574	0.188943	-0.723669	244.771	2.38876	202.625	-10.7783	128.097	7.74767e-07	0.999999	2.83588e-07	1
	3	117	5	15.7267	0.222286	-0.653088	196.362	2.29306	140.511	-18.2669	126.294	4.19586e-06	0.999996	0.00665822	0.993342
	3	117	6	30.7477	0.227843	-0.642364	202.943	2.30737	122.986	-1.22248	102.142	3.81644e-06	0.999996	0.00559334	0.994407
	3	117	7	32.6705	0.494586	-0.305758	92.1135	1.96432	27.7479	-3.34401	167.665	0.00158668	0.998413	0.986077	0.0139232
	3	117	8	33.8986	15.3766	1.18686	42.1875	1.62518	9.14032	-10.0054	182.105	0.999976	2.44991e-05	0.988567	0.0114327
	3	117	9	52.0371	1.22813	0.0892443	98.7483	1.99453	52.4262	-19.9228	225.568	0.0335593	0.966441	0.997879	0.00212093
	3	117	10	53.7821	0.211172	-0.675364	211.36	2.32502	162.752	0.714435	78.468	2.42971e-06	0.999998	1.64156e-05	0.999984
	3	117	11	54.5823	0.611286	-0.213755	140.656	2.14816	41.7761	-32.6127	214.973	0.000630955	0.999369	0.999914	8.55933e-05
	3	117	12	58.0166	1.97834	0.296302	43.3435	1.63692	11.9851	-22.7324	224.607	0.640567	0.359433	0.999258	0.000742286
	0.3	118	1	0.261192	0.300093	-0.522744	149.389	2.17432	128.079	-0.0349935	32.757	4.14184e-05	0.999959	0.000340097	0.99966
	0.3	118	2	15.3937	0.255635	-0.59238	160.427	2.20528	147.32	-2.68831	38.4006	1.79429e-05	0.999982	3.80048e-05	0.999962
	0.3	118	3	16.9719	0.344551	-0.462746	138.67	2.14198	111.35	-8.09592	87.5313	9.03431e-05	0.99991	0.0109735	0.989026
	0.3	118	4	17.8555	0.311208	-0.50695	156.851	2.19549	115.569	-2.35704	63.5607	3.69092e-05	0.999963	0.00272588	0.997274
	0.3	118	5	30.7595	0.222291	-0.653078	205.663	2.31316	181.262	4.67803	13.8041	3.29448e-06	0.999997	1.17966e-07	1
	0.3	118	6	31.9377	0.288978	-0.539134	161.075	2.20703	145.616	-4.60889	47.3329	2.56901e-05	0.999974	6.65139e-05	0.999933
	0.3	118	7	33.8327	0.24452	-0.611685	173.348	2.23892	144.326	-8.30715	82.7173	1.06518e-05	0.999989	0.000232085	0.999768
	0.3	118	8	37.595	0.255635	-0.59238	176.043	2.24562	134.045	-10.2512	72.8786	1.13085e-05	0.999989	0.0010056	0.998994
	0.3	118	9	39.9068	0.24452	-0.611685	195.472	2.29108	162.266	-6.67378	62.1535	5.79164e-06	0.999994	1.05603e-05	0.999989
	0.3	118	10	40.7515	0.30565	-0.514775	183.156	2.26282	141.949	-0.331038	71.8181	1.65939e-05	0.999983	0.000173178	0.999827
	0.3	118	11	41.4851	0.772462	-0.112123	150.215	2.17671	92.7451	0.499226	70.1726	0.00124096	0.998759	0.0291976	0.970802
	0.3	118	12	47.5203	0.24452	-0.611685	168.583	2.22681	150.262	-4.91613	48.9155	1.22539e-05	0.999988	3.75123e-05	0.999962
	0.3	118	13	49.532	0.311208	-0.50695	139.795	2.14549	107.639	-8.59528	69.5136	6.3284e-05	0.999937	0.0135041	0.986496
	0.3	118	14	52.8942	0.361223	-0.442224	132.248	2.12139	103.511	-7.55309	89.1614	0.00012995	0.99987	0.0227225	0.977278
	0.3	118	15	53.8445	0.30565	-0.514775	153.669	2.18659	101.952	-0.772246	95.5064	3.83916e-05	0.999962	0.0315467	0.968453
	0.3	118	16	57.7624	0.30565	-0.514775	155.863	2.19274	101.444	-12.4454	103.067	3.59017e-05	0.999964	0.0711179	0.928882
	0.3	119	1	0.739118	0.166718	-0.778017	111.344	2.04667	59.9236	-17.2588	129.113	3.74926e-05	0.999963	0.880614	0.119386
	0.3	119	2	8.94722	0.205619	-0.686936	226.877	2.35579	185.819	5.09565	18.7139	1.53016e-06	0.999998	6.52024e-08	1
	0.3	119	3	9.71412	0.200062	-0.698835	256.28	2.40871	223.19	-3.32357	47.3752	7.22594e-07	0.999999	1.65034e-10	1
	0.3	119	4	10.5533	0.344551	-0.462746	224.147	2.35053	132.256	4.61464	63.5014	9.54266e-06	0.99999	0.000681264	0.999319
	0.3	119	5	11.3757	0.205619	-0.686936	234.241	2.36966	189.242	-1.26216	78.4432	1.28799e-06	0.999999	2.49305e-07	1
	0.3	119	6	12.2816	0.266749	-0.573897	188.087	2.27436	168.158	-4.81908	91.3231	9.30165e-06	0.999991	9.73578e-06	0.99999
	0.3	119	7	13.054	0.477926	-0.320639	141.684	2.15132	96.4009	-3.12369	114.503	0.000247612	0.999752	0.0934265	0.906573
	0.3	119	8	22.3347	0.166718	-0.778017	216.85	2.33616	179.419	1.97731	64.6355	1.04024e-06	0.999999	8.28635e-07	0.999999
	0.3	119	9	27.1806	0.277864	-0.556168	160.416	2.20525	130.144	2.83463	21.146	2.31755e-05	0.999977	0.000204506	0.999795
	0.3	119	10	31.8765	0.144489	-0.840164	162.793	2.21163	125.065	4.85205	121.899	3.5116e-06	0.999996	0.0658534	0.934147
	0.3	119	11	32.4545	0.216734	-0.664073	144.193	2.15895	104.052	-12.4514	100.593	1.9023e-05	0.999981	0.0547052	0.945295
	0.3	119	12	34.1328	0.377895	-0.422629	131.27	2.11817	51.08	-1.20525	125.323	0.000155171	0.999845	0.792817	0.207183
	0.3	119	13	35.9111	0.24452	-0.611685	165.93	2.21993	92.5499	1.02182	94.1279	1.32684e-05	0.999987	0.0774019	0.922598
	0.3	119	14	42.6855	0.24452	-0.611685	218.623	2.3397	111.417	10.3711	25.5455	3.25684e-06	0.999997	0.00391883	0.996081
	0.3	119	15	44.1137	0.311208	-0.50695	143.008	2.15536	58.9015	-21.2735	172.593	5.69298e-05	0.999943	0.979127	0.0208725
	0.3	119	16	57.0399	0.24452	-0.611685	178.817	2.25241	143.426	3.20093	38.0435	9.10652e-06	0.999991	5.56583e-05	0.999944
	0.5	120	1	0	0.244515	-0.611695	122.953	2.08974	108.835	-5.78769	52.2797	5.796e-05	0.999942	0.201898	0.798102
	0.5	120	2	1.25592	0.889144	-0.051028	100.128	2.00056	45.179	-1.17088	124.489	0.00901777	0.990982	0.823817	0.176183
	0.5	120	3	3.72329	0.483472	-0.315629	116.385	2.0659	36.6045	-11.1685	202.169	0.000580896	0.999419	0.994837	0.00516296
	0.5	120	4	4.57353	1.33927	0.126869	105.916	2.02496	57.3312	-19.7626	199.298	0.0392373	0.960763	0.989633	0.0103667
	0.5	120	5	9.36935	0.255629	-0.59239	177.28	2.24866	161.404	-2.22851	34.2109	1.09187e-05	0.999989	4.64323e-06	0.999995
	0.5	120	6	23.8013	0.477915	-0.32065	77.3869	1.88867	30.6219	-20.1444	142.75	0.00280269	0.997197	0.986239	0.013761
	0.5	120	7	29.3362	0.533486	-0.272877	97.7864	1.99028	54.3485	-2.26886	120.711	0.00160379	0.998396	0.69463	0.30537
	0.5	120	8	31.0089	0.4668	-0.330869	99.0649	1.99592	50.5714	-19.0484	140.441	0.000992939	0.999007	0.95717	0.0428297
	0.5	120	9	35.4768	0.255629	-0.59239	179.921	2.25508	170.564	1.35746	21.0998	1.01395e-05	0.99999	7.48975e-07	0.999999
	0.5	120	10	36.0881	8.42464	0.925551	61.1053	1.78608	19.4883	-13.881	177.057	0.999115	0.000884672	0.984011	0.0159893
	0.5	120	11	49.0919	0.533486	-0.272877	72.7404	1.86178	44.7709	-17.3855	189.911	0.00487449	0.995126	0.987175	0.0128248
	0.5	120	12	50.131	0.433458	-0.363053	100.175	2.00076	71.4998	-18.8172	123.177	0.000753649	0.999246	0.846162	0.153838
	0.5	120	13	50.9924	0.394558	-0.40389	120.665	2.08158	98.2132	-10.9507	98.1167	0.000257092	0.999743	0.0672278	0.932772
	0.5	121	1	1.90054	0.344543	-0.462756	154.829	2.18985	101.577	-3.20083	94.3591	5.45952e-05	0.999945	0.0267283	0.973272
	0.5	121	2	3.17313	0.177829	-0.749998	211.939	2.32621	154.65	5.28689	64.3032	1.42467e-06	0.999999	4.91293e-05	0.999951
	0.5	121	3	14.0818	0.172272	-0.763786	256.251	2.40867	229.431	-0.782081	36.4485	4.49494e-07	1	3.12599e-11	1
	0.5	121	4	14.5042	0.316757	-0.499273	208.221	2.31852	113.035	-5.09295	139.794	1.00696e-05	0.99999	0.0751946	0.924805
	0.5	121	5	15.6045	0.138929	-0.857208	258.357	2.41222	245.167	-0.581488	20.6844	2.25445e-07	1	7.37826e-13	1
	0.5	121	6	24.6904	0.2334	-0.631899	216.768	2.336	196.533	-4.30499	70.3514	2.92326e-06	0.999997	4.84413e-08	1
	0.5	121	7	31.359	0.238957	-0.62168	209.238	2.32064	159.409	6.26917	43.3602	3.79113e-06	0.999996	1.09353e-05	0.999989
	0.5	121	8	32.0703	0.211172	-0.675364	195.06	2.29017	173.805	-3.41961	31.1718	3.71438e-06	0.999996	7.61679e-07	0.999999
	0.5	121	9	33.8708	0.944715	-0.0246991	160.046	2.20424	68.2363	8.84658	79.1146	0.00232501	0.997675	0.537402	0.462598
	0.5	121	10	53.8877	0.327872	-0.484296	177.013	2.24801	101.869	-1.51332	142.496	2.47497e-05	0.999975	0.318483	0.681517
	0.5	121	11	55.0102	0.250072	-0.601935	190.311	2.27946	172.087	1.42602	9.89012	7.12776e-06	0.999993	4.98133e-07	1
	0.5	121	12	55.5937	0.216729	-0.664083	158.288	2.19945	134.041	-6.93699	89.6466	1.18426e-05	0.999988	0.000864413	0.999136
	0.5	121	13	58.5334	0.405672	-0.391825	170.138	2.2308	135.827	2.4252	23.9387	6.23626e-05	0.999938	0.000105398	0.999895
	10	122	1	5.79622	0.944734	-0.0246904	73.8171	1.86816	36.9648	-3.997	182.461	0.0293809	0.970619	0.993447	0.00655269
	10	122	2	6.97992	5.56282	0.745295	54.0807	1.73304	16.5771	-26.3339	196.482	0.992427	0.00757271	0.999272	0.000728434
	10	122	3	12.9651	0.561283	-0.250818	81.0762	1.90889	35.1138	-16.1868	116.68	0.00381946	0.996181	0.944138	0.0558624
	10	122	4	15.3269	3.979	0.599774	40.4539	1.60696	14.2043	-10.746	199.18	0.972898	0.0271022	0.995512	0.004488
	10	122	5	22.707	37.2892	1.57158	51.4381	1.71129	11.3473	-27.6334	226.308	1	6.57299e-08	0.999772	0.000228364
	6	123	1	0	0.716872	-0.144558	84.9339	1.92908	25.1085	-28.1921	182.213	0.00720417	0.992796	0.837232	0.162768
	6	123	2	12.6925	0.177829	-0.749998	207.306	2.31661	186.192	-7.22758	54.734	1.60849e-06	0.999998	2.40209e-07	1
	6	123	3	14.3263	0.1945	-0.71108	221.323	2.34503	193.574	-8.753	91.2146	1.47138e-06	0.999999	2.17946e-07	1
	6	123	4	24.3459	0.250072	-0.601935	192.459	2.28434	141.832	-8.24386	91.0411	6.73335e-06	0.999993	0.000389764	0.99961
	6	123	5	27.3301	10.8253	1.03444	44.1289	1.64472	6.41929	-13.3616	207.016	0.999813	0.000187225	0.996752	0.00324807
	6	123	6	39.4835	20.5114	1.312	37.6944	1.57628	9.48253	-18.9883	161.333	0.999996	4.48678e-06	0.989911	0.0100886
	6	124	1	0	0.677972	-0.168788	110.455	2.04319	27.022	1.59066	94.0655	0.00232616	0.997674	0.852045	0.147955
	6	124	2	2.55629	0.605729	-0.217721	115.202	2.06146	54.6584	7.61913	139.137	0.00132198	0.998678	0.991701	0.00829861
	6	124	3	6.64079	0.277857	-0.556178	240.422	2.38097	147.256	-7.67203	86.3433	3.09478e-06	0.999997	0.000162321	0.999838
	6	124	4	7.81891	0.200057	-0.698845	228.817	2.35949	164.753	-7.16151	119.404	1.34056e-06	0.999999	5.78437e-05	0.999942
	6	124	5	9.4416	0.1945	-0.71108	167.641	2.22438	143.583	-18.0809	173.39	6.49312e-06	0.999994	0.0224169	0.977583
	6	124	6	14.4708	0.250072	-0.601935	183.935	2.26466	158.3	-6.75454	78.5838	8.46875e-06	0.999992	2.72384e-05	0.999973
	6	124	7	17.3716	0.283415	-0.547578	171.059	2.23315	75.7802	-17.8633	159.37	1.80501e-05	0.999982	0.853401	0.146599
	6	124	8	20.8115	0.294529	-0.530872	144.163	2.15885	123.972	-5.78747	91.624	4.62613e-05	0.999954	0.00270905	0.997291
	6	124	9	29.0472	7.53549	0.877112	40.3853	1.60622	8.58883	-21.814	207.797	0.998718	0.00128218	0.998324	0.00167552
	6	124	10	45.4964	14.4986	1.16133	39.2571	1.59392	8.70123	-27.2451	205.688	0.999965	3.52034e-05	0.999583	0.000417237
	6	125	1	4.04005	0.227843	-0.642364	161.545	2.20829	122.064	-10.5225	67.5372	1.2323e-05	0.999988	0.00429893	0.995701
	6	125	2	4.72913	0.822458	-0.0848863	64.4851	1.80946	38.0972	-18.4454	172.359	0.0278164	0.972184	0.983327	0.0166734
	6	125	3	10.1474	0.778001	-0.10902	103.342	2.01428	48.9881	-16.7181	261.121	0.0049003	0.9951	0.999884	0.00011563
	6	125	4	13.8095	0.261186	-0.58305	203.552	2.30868	158.474	-0.150493	66.4237	5.83592e-06	0.999994	1.60412e-05	0.999984
	6	125	5	14.4208	0.2334	-0.631899	209.168	2.3205	160.791	-6.6059	94.5189	3.52072e-06	0.999996	3.21613e-05	0.999968
	6	125	6	17.3994	0.250072	-0.601935	143.129	2.15573	118.838	-13.768	108.95	2.94755e-05	0.999971	0.0192473	0.980753
	6	125	7	21.3784	11.7423	1.06975	39.4862	1.59645	9.48018	-5.16028	175.135	0.999883	0.000117359	0.990045	0.00995549
	6	125	8	35.4768	4.29012	0.632469	52.7957	1.7226	15.2885	-20.0473	196.018	0.973555	0.0264452	0.996346	0.00365414
	6	125	9	45.2574	0.828015	-0.0819617	68.209	1.83384	24.3425	-30.603	206.165	0.0239211	0.976079	0.999858	0.000141555
	6	125	10	46.6634	13.3316	1.12488	40.4195	1.60659	9.51383	-19.0901	199.861	0.999943	5.69757e-05	0.996482	0.0035183
	6	126	1	0.2334	0.511258	-0.29136	74.9015	1.87449	29.1199	-8.95153	123.303	0.00386005	0.99614	0.854595	0.145405
	6	126	2	7.34655	0.138929	-0.857208	236.847	2.37447	189.107	-1.68933	56.0631	3.75018e-07	1	9.85606e-08	1
	6	126	3	8.40241	0.633515	-0.198243	116.658	2.06691	44.0145	-16.6542	232.028	0.00148207	0.998518	0.998893	0.00110676
	6	126	4	9.85838	0.394558	-0.40389	99.2742	1.99684	62.1848	-8.50602	180.162	0.000588714	0.999411	0.960349	0.0396512
	6	126	5	11.3199	0.361215	-0.442235	113.703	2.05577	45.0722	-10.8368	173.165	0.000252987	0.999747	0.963322	0.0366781
	6	126	6	12.8926	47.1024	1.67304	43.4319	1.63781	7.49363	-19.3139	177.172	1	1.52292e-08	0.993227	0.0067732
	0.2	127	1	0.705758	0.250072	-0.601935	118.655	2.07429	67.533	-6.12098	103.885	7.30369e-05	0.999927	0.336819	0.663181
	0.2	127	2	2.61186	0.789115	-0.10286	180.601	2.25672	86.3195	-14.1935	147.463	0.000678806	0.999321	0.519185	0.480815
	0.2	127	3	4.05672	1.25036	0.0970345	187.436	2.27285	128.059	3.25867	59.289	0.00494454	0.995055	0.000759608	0.99924
	0.2	127	4	8.54689	0.694644	-0.158238	169.749	2.22981	98.7378	8.03668	65.7561	0.000501889	0.999498	0.0449465	0.955054
	0.2	127	5	10.7364	0.183386	-0.736634	157.054	2.19605	96.4056	-4.678	85.5285	7.80798e-06	0.999992	0.0320002	0.968
	0.2	127	6	11.9423	0.672415	-0.172363	164.559	2.21632	107.777	-3.97259	82.6168	0.000495891	0.999504	0.0102879	0.989712
	0.2	127	7	22.851	0.227843	-0.642364	170.409	2.23149	144.478	-0.219159	40.7622	9.3919e-06	0.999991	4.93296e-05	0.999951
	0.2	127	8	24.7682	0.4668	-0.330869	106.213	2.02618	54.0038	-8.77541	140.509	0.000750097	0.99925	0.800419	0.199581
	0.2	127	9	31.6757	0.277857	-0.556178	169.874	2.23013	146.053	-4.15285	48.0011	1.75316e-05	0.999982	5.98648e-05	0.99994
	0.2	127	10	35.2712	0.277857	-0.556178	161.699	2.20871	130.634	-4.49479	61.5636	2.22943e-05	0.999978	0.000545472	0.999455
	0.2	127	11	37.2662	0.255629	-0.59239	150.096	2.17637	118.35	-1.04272	46.5811	2.48967e-05	0.999975	0.00136019	0.99864
	0.2	127	12	38.072	0.405672	-0.391825	156.095	2.19339	92.6215	0.119855	119.839	9.15702e-05	0.999908	0.227835	0.772165
	0.2	127	13	38.85	0.305643	-0.514785	157.764	2.19801	142.751	-5.00756	44.487	3.38955e-05	0.999966	0.000100114	0.9999
	0.2	127	14	39.3946	0.238957	-0.62168	199.812	2.30062	167.509	5.93553	5.37545	4.80933e-06	0.999995	9.16918e-07	0.999999
	0.2	127	15	40.0559	0.2723	-0.564952	161.083	2.20705	122.132	-4.43578	88.728	2.13315e-05	0.999979	0.00290579	0.997094
	0.2	127	16	49.9866	0.294529	-0.530872	161.822	2.20904	115.604	4.38947	67.9034	2.66858e-05	0.999973	0.00493371	0.995066
	0.2	127	17	51.4759	0.3112	-0.50696	138.149	2.14035	118.719	-3.24208	48.8115	6.68576e-05	0.999933	0.00158301	0.998417
	0.2	127	18	57.4442	0.338986	-0.469818	142.383	2.15346	100.454	0.313859	68.0387	7.60515e-05	0.999924	0.0138692	0.986131
	0.2	127	19	58.1833	0.444572	-0.352058	124.686	2.09582	89.3585	-2.26286	55.8597	0.000329994	0.99967	0.0286563	0.971344
	0.2	128	1	0.416786	0.161157	-0.79275	228.144	2.35821	210.434	-0.293591	16.6273	7.09097e-07	0.999999	7.67381e-10	1
	0.2	128	2	1.62824	0.166714	-0.778027	196.673	2.29374	165.088	-11.9327	87.7712	1.78862e-06	0.999998	2.68241e-05	0.999973
	0.2	128	3	2.33956	0.277857	-0.556178	221.416	2.34521	142.307	-10.4475	128.457	4.6999e-06	0.999995	0.00166512	0.998335
	0.2	128	4	2.98419	0.166714	-0.778027	233.4	2.3681	204.197	5.32342	8.95168	6.88899e-07	0.999999	1.9943e-09	1
	0.2	128	5	5.06256	0.188943	-0.723669	268.033	2.42819	237.648	2.83323	64.5333	4.68201e-07	1	2.97836e-11	1
	0.2	128	6	5.59049	0.205614	-0.686946	263.954	2.42153	219.275	-2.32477	62.1588	6.72598e-07	0.999999	5.82899e-10	1
	0.2	128	7	8.04119	0.144486	-0.840175	228.711	2.35929	201.95	-2.62845	41.3506	5.12305e-07	0.999999	7.19826e-09	1
	0.2	128	8	9.47494	0.250072	-0.601935	178.584	2.25184	160.097	-7.19508	96.1847	9.82734e-06	0.99999	3.86067e-05	0.999961
	0.2	128	9	10.3863	0.216729	-0.664083	219.891	2.34221	165.558	4.77519	50.7227	2.13689e-06	0.999998	5.00864e-06	0.999995
	0.2	128	10	12.5758	0.200057	-0.698845	197.703	2.29601	175.359	-2.39344	34.4289	2.94038e-06	0.999997	5.54126e-07	0.999999
	0.2	128	11	13.2371	0.283415	-0.547578	171.662	2.23467	146.776	-4.26904	66.4558	1.77432e-05	0.999982	7.86109e-05	0.999921
	0.2	128	12	14.1429	0.1945	-0.71108	187.49	2.27298	134.45	-2.17507	88.379	3.59079e-06	0.999996	0.000758342	0.999242
	0.2	128	13	14.6987	0.261186	-0.58305	192.544	2.28453	172.77	-3.89604	41.8984	7.72607e-06	0.999992	1.09298e-06	0.999999
	0.2	128	14	25.9241	0.205615	-0.686946	222.729	2.34778	204.219	3.70694	61.1394	1.68968e-06	0.999998	1.49932e-08	1
	0.2	128	15	29.4696	0.177829	-0.749998	227.578	2.35713	207.912	-3.30453	39.4885	9.61764e-07	0.999999	2.44898e-09	1
	0.2	128	16	31.7702	0.200057	-0.698845	217.034	2.33653	188.129	-5.99401	72.5518	1.7837e-06	0.999998	2.31042e-07	1
	0.2	128	17	32.3259	0.216729	-0.664083	224.194	2.35062	208.004	-1.33633	34.1878	1.92774e-06	0.999998	1.8652e-09	1
	0.2	128	18	34.9211	0.322315	-0.49172	197.669	2.29594	159.075	-1.19471	36.6204	1.37709e-05	0.999986	6.26684e-06	0.999994
	0.2	128	19	35.5491	0.250072	-0.601935	191.501	2.28217	103.634	-20.3548	148.552	6.90605e-06	0.999993	0.481835	0.518165
	0.2	128	20	36.077	0.161157	-0.79275	230.945	2.36351	213.805	-4.54392	61.6509	6.61853e-07	0.999999	1.65859e-09	1
	0.2	128	21	36.5605	0.1945	-0.71108	218.352	2.33916	204.694	0.738641	16.0908	1.58329e-06	0.999998	2.09406e-09	1
	0.2	128	22	37.1329	0.1945	-0.71108	215.727	2.3339	190.075	1.40854	21.681	1.69051e-06	0.999998	3.10209e-08	1
	0.2	128	23	37.6441	0.150043	-0.823784	217.786	2.33803	182.435	-5.38663	57.0932	7.53287e-07	0.999999	3.66728e-07	1
	0.2	128	24	38.4055	0.188943	-0.723669	234.706	2.37052	209.16	2.946	14.2287	9.76336e-07	0.999999	8.43345e-10	1
	0.2	128	25	39.7003	0.238957	-0.62168	209.809	2.32182	122.368	4.48938	122.25	3.73804e-06	0.999996	0.0772018	0.922798
	0.2	128	26	43.4347	0.222286	-0.653088	180.191	2.25573	141.585	1.48347	50.7665	6.55289e-06	0.999993	9.48341e-05	0.999905
	0.2	128	27	44.0793	0.133372	-0.874937	195.921	2.29208	172.671	2.94616	28.4979	1.00929e-06	0.999999	6.41539e-07	0.999999
	0.2	128	28	44.8517	0.1945	-0.71108	223.203	2.3487	193.54	6.45417	3.31851	1.40534e-06	0.999999	1.23811e-08	1
	0.2	128	29	46.9579	0.261186	-0.58305	173.116	2.23834	156.637	-0.0192041	20.1862	1.31464e-05	0.999987	6.51411e-06	0.999993
	0.2	128	30	49.2475	0.266743	-0.573907	161.316	2.20768	142.755	-4.76915	59.279	1.98776e-05	0.99998	0.000118403	0.999882
	0.2	128	31	51.5537	0.205615	-0.686946	182.765	2.26189	166.871	-0.698594	25.3951	4.83165e-06	0.999995	1.58401e-06	0.999998
	0.2	128	32	53.3653	0.288972	-0.539145	157.214	2.19649	140.706	-1.82636	34.1976	2.88654e-05	0.999971	8.05787e-05	0.999919
	0.2	128	33	57.8555	0.255629	-0.59239	209.813	2.32183	151.198	-14.4451	108.171	4.65999e-06	0.999995	0.000469772	0.99953
	0.2	128	34	59.2281	0.238957	-0.62168	212.722	2.32781	185.82	5.96017	20.4697	3.48037e-06	0.999997	7.43853e-08	1
	0.2	128	35	59.806	0.183386	-0.736634	229.062	2.35995	181.198	3.5776	36.0191	1.01838e-06	0.999999	2.19538e-07	1
	1	129	1	0.272307	0.333437	-0.476987	170.429	2.23154	124.357	-4.31684	96.1421	3.13257e-05	0.999969	0.00299945	0.997001
	1	129	2	0.972524	0.394567	-0.403879	146.518	2.16589	116.836	-5.99316	69.1847	0.000110186	0.99989	0.00347846	0.996522
	1	129	3	3.31214	0.405681	-0.391815	129.875	2.11353	94.4076	-13.3149	102.351	0.000204806	0.999795	0.146931	0.853069
	1	129	4	4.66811	0.161161	-0.79274	174.409	2.24157	80.816	15.7192	107.914	3.16147e-06	0.999997	0.990626	0.00937417
	1	129	5	6.52424	0.616858	-0.209815	106.159	2.02596	57.2315	-22.069	152.532	0.00192095	0.998079	0.978833	0.0211673
	1	129	6	9.79748	0.288978	-0.539134	167.525	2.22408	70.2627	-19.5088	222.026	2.12562e-05	0.999979	0.994295	0.0057047
	1	129	7	15.2214	0.494598	-0.305748	88.1306	1.94513	40.8155	-34.7978	244.183	0.00188384	0.998116	0.999982	1.81617e-05
	1	129	8	20.0951	0.411239	-0.385906	107.186	2.03014	17.6138	-23.8543	253.435	0.000484171	0.999516	0.999853	0.000147177
	1	129	9	21.1843	0.372338	-0.429063	144.82	2.16083	82.2977	-2.79807	195.532	9.55721e-05	0.999904	0.991405	0.00859495
	1	129	10	23.1405	0.416796	-0.380077	133.679	2.12606	88.2084	-20.8477	164.135	0.000197774	0.999802	0.84427	0.15573
	1	129	11	24.9577	0.36678	-0.435594	140.581	2.14793	97.5015	-14.7654	140.418	0.000103903	0.999896	0.277901	0.722099
	1	129	12	25.9303	0.422353	-0.374324	111.244	2.04628	68.6523	-24.3392	181.558	0.000450506	0.999549	0.987769	0.0122307
	1	129	13	28.0031	0.405681	-0.391815	101.558	2.00672	55.1454	-10.4423	121.468	0.000581853	0.999418	0.69319	0.30681
	1	129	14	28.7923	0.605743	-0.217711	88.1906	1.94542	35.865	-21.2955	181.192	0.00358389	0.996416	0.993293	0.00670656
	1	129	15	31.9988	0.377895	-0.422629	137.283	2.13762	67.8928	-18.8598	186.374	0.000127321	0.999873	0.966341	0.0336594
	1	129	16	37.1448	0.172276	-0.763776	183.925	2.26464	131.034	-16.8599	148.505	2.82797e-06	0.999997	0.0265987	0.973401
	1	129	17	39.8346	3.3955	0.530903	61.7646	1.79074	15.1892	-26.115	207.286	0.905345	0.094655	0.999381	0.000619033
	1	129	18	45.6642	0.177833	-0.749988	148.577	2.17195	68.4662	-1.92823	89.0255	9.66363e-06	0.99999	0.231574	0.768426
	1	129	19	47.687	0.355666	-0.448958	157.13	2.19626	129.741	-7.16717	144.435	5.67066e-05	0.999943	0.0167262	0.983274
	1	129	20	49.5709	0.166718	-0.778017	271.622	2.43396	245.738	-6.13755	55.3847	2.91541e-07	1	2.59116e-12	1
	1	129	21	50.6935	0.288978	-0.539134	164.873	2.21715	48.5329	-43.0864	297.481	2.29602e-05	0.999977	1	1.06474e-07
	1	129	22	54.9948	0.36678	-0.435594	139.846	2.14565	66.2499	-26.5289	211.703	0.000106368	0.999894	0.997584	0.00241573
	1	129	23	56.1118	3.88454	0.589339	72.1632	1.85832	26.1715	-28.939	242.151	0.935408	0.0645923	0.999893	0.000106747
	1	130	1	1.16703	0.844706	-0.0732943	83.1267	1.91974	37.7691	-12.6178	92.0974	0.013703	0.986297	0.852997	0.147003
	1	130	2	2.92313	0.539056	-0.268366	88.2657	1.94579	53.3598	-5.73667	96.0284	0.00245093	0.997549	0.479373	0.520627
	1	130	3	4.02347	0.655759	-0.183256	81.5654	1.91151	52.3214	-8.02634	70.5899	0.00615071	0.993849	0.500332	0.499668
	1	130	4	5.22384	0.422353	-0.374324	111.436	2.04702	68.5493	-16.2751	140.923	0.000447268	0.999553	0.807198	0.192802
	1	130	5	7.70795	0.872493	-0.0592382	131.947	2.1204	76.8663	1.32233	71.1537	0.00327208	0.996728	0.102386	0.897614
	1	130	6	10.9478	0.989196	-0.00471784	81.2211	1.90967	49.6188	-13.6665	176.108	0.0259853	0.974015	0.963355	0.0366449
	1	130	7	12.5094	0.489041	-0.310655	100.198	2.00086	66.4203	-16.163	165.8	0.00110014	0.9989	0.905501	0.0944988
	1	130	8	14.9157	0.472369	-0.325719	108.831	2.03675	74.6323	-18.1553	152.019	0.000706296	0.999294	0.845685	0.154315
	1	130	9	16.3884	0.622415	-0.20592	98.0658	1.99152	31.61	-13.0197	253.866	0.00266079	0.997339	0.999908	9.17342e-05
	1	130	10	17.7388	0.539056	-0.268366	104.753	2.02017	73.3525	-8.95428	102.323	0.00127202	0.998728	0.294843	0.705157
	1	130	11	21.0954	0.466811	-0.330859	106.402	2.02695	46.5371	-3.9384	195.61	0.000744785	0.999255	0.997247	0.0027527
	1	130	12	25.6191	18.1278	1.25835	47.5675	1.67731	12.6527	-7.6018	110.274	0.999991	8.65612e-06	0.854634	0.145366
	1	130	13	46.9257	13.0707	1.1163	46.3321	1.66588	9.61431	-22.9879	165.814	0.999937	6.34545e-05	0.997054	0.00294594
	1	131	1	1.17814	0.550171	-0.259503	92.275	1.96508	54.8077	-15.6348	102.958	0.00221234	0.997788	0.849736	0.150264
	1	131	2	4.91819	0.605743	-0.217711	90.1754	1.95509	54.8351	-22.2249	156.302	0.00330398	0.996696	0.982833	0.0171674
	1	131	3	6.4131	0.622415	-0.20592	91.2802	1.96038	48.1483	-15.42	109.37	0.0034599	0.99654	0.882666	0.117334
	1	131	4	7.7524	0.583514	-0.233949	91.9628	1.96361	39.5215	-13.7581	95.1259	0.00271589	0.997284	0.879147	0.120853
	1	131	5	8.94166	1.55604	0.19202	94.1182	1.97367	15.6139	10.969	106.321	0.098656	0.901344	0.98964	0.0103596
	1	131	6	12.854	0.322322	-0.49171	137.156	2.13722	114.955	-0.81061	39.0412	7.70316e-05	0.999923	0.00174523	0.998255
	1	131	7	13.6487	0.211177	-0.675354	127.725	2.10628	106.799	1.58365	22.7863	3.2679e-05	0.999967	0.00308011	0.99692
	1	131	8	18.5613	0.205619	-0.686936	158.018	2.19871	82.8314	-16.443	147.566	1.03095e-05	0.99999	0.663157	0.336843
	1	131	9	21.5511	0.277864	-0.556168	178.327	2.25122	100.242	-20.5707	148.049	1.38187e-05	0.999986	0.569487	0.430513
	1	131	10	22.2291	0.277864	-0.556168	221.596	2.34556	190.565	-7.93001	94.3112	4.68099e-06	0.999995	3.7894e-07	1
	1	131	11	25.469	0.75579	-0.121599	73.3363	1.86532	35.6797	-11.4544	111.426	0.0140691	0.985931	0.839632	0.160368
	1	131	12	28.7422	0.583514	-0.233949	103.399	2.01452	48.0504	-20.5806	165.798	0.00174945	0.998251	0.982403	0.0175966
	1	131	13	30.1316	0.844706	-0.0732943	60.6783	1.78303	20.0925	-11.7276	144.87	0.0363637	0.963636	0.943209	0.0567911
	1	131	14	32.1933	27.8031	1.44409	44.2977	1.64638	4.94083	-6.76278	89.2458	0.999999	5.70642e-07	0.826145	0.173855
	1	132	1	0.566842	0.42791	-0.368647	113.121	2.05354	43.7881	-4.57165	129.715	0.000437882	0.999562	0.814661	0.185339
	1	132	2	3.71226	0.277864	-0.556168	140.604	2.148	94.4418	-15.7801	143.269	4.3708e-05	0.999956	0.389071	0.610929
	1	132	3	10.0865	0.205619	-0.686936	181.185	2.25812	156.613	-10.3357	103.554	5.05737e-06	0.999995	0.000102896	0.999897
	1	132	4	10.6255	0.205619	-0.686936	226.766	2.35558	199.909	-3.56491	64.6881	1.53421e-06	0.999998	2.16919e-08	1
	1	132	5	11.8259	0.611301	-0.213745	87.6941	1.94297	50.6578	-25.128	161.938	0.00376995	0.99623	0.995285	0.00471475
	1	132	6	13.6209	0.466811	-0.330859	117.665	2.07065	82.91	-14.8689	116.014	0.000494053	0.999506	0.427162	0.572838
	1	132	7	14.4767	0.494598	-0.305748	108.185	2.03417	84.4395	-20.7135	139.486	0.00084118	0.999159	0.817025	0.182975
	1	132	8	17.8722	0.444582	-0.352048	119.147	2.07608	60.1485	-14.1839	148.971	0.000399118	0.999601	0.854126	0.145874
	1	132	9	21.2344	0.461254	-0.33606	100.038	2.00017	76.5631	-16.2532	178.827	0.000919518	0.99908	0.902478	0.0975219
	1	132	10	23.8685	0.30565	-0.514775	128.893	2.11023	93.7035	-17.5947	145.276	8.72899e-05	0.999913	0.504525	0.495475
	1	132	11	24.5521	0.266749	-0.573897	152.959	2.18458	105.763	-14.9852	122.915	2.57757e-05	0.999974	0.109089	0.890911
	1	132	12	25.1189	0.63353	-0.198233	75.964	1.88061	50.3245	-11.882	143.702	0.00705997	0.99294	0.860859	0.139141
	1	132	13	27.5974	0.611301	-0.213745	73.3945	1.86566	12.8121	-28.7238	219.72	0.00712219	0.992878	0.999805	0.000194719
	1	132	14	29.4202	0.750233	-0.124804	84.9099	1.92896	46.3779	-8.56318	167.131	0.00843193	0.991568	0.95276	0.0472405
	1	132	15	36.7503	0.805805	-0.0937698	99.4645	1.99767	45.4919	-26.6865	225.136	0.00636813	0.993632	0.999407	0.000592512
	1	132	16	39.7957	11.0701	1.04415	34.8076	1.54167	8.96411	-24.6313	179.582	0.999838	0.00016219	0.998516	0.00148386
	1	132	17	56.6064	3.38994	0.530192	41.9361	1.62259	11.5399	-22.3636	198.099	0.944167	0.0558332	0.997928	0.00207168
	10	133	1	2.10616	0.416786	-0.380087	112.108	2.04964	50.0644	-26.5869	192.556	0.000418211	0.999582	0.998143	0.00185686
	10	133	2	2.8786	0.166714	-0.778027	210.475	2.3232	180.526	8.25089	45.6986	1.22828e-06	0.999999	7.99931e-07	0.999999
	10	133	3	6.41851	0.338986	-0.469818	152.431	2.18307	71.7	-37.7453	255.945	5.56165e-05	0.999944	0.999987	1.30907e-05
	10	133	4	10.3752	0.494586	-0.305758	93.097	1.96894	48.7833	-12.991	220.185	0.00152231	0.998478	0.997695	0.0023054
	10	133	5	13.1204	0.933601	-0.0298387	63.8038	1.80485	23.6169	-18.5181	200.362	0.0432784	0.956722	0.995722	0.00427768
	10	133	6	15.2099	0.500143	-0.300905	92.9659	1.96832	54.7877	-10.4855	131.151	0.00158542	0.998415	0.750204	0.249796
	10	133	7	17.4272	0.722429	-0.141205	102.011	2.00865	44.017	-25.3765	230.929	0.0039058	0.996094	0.999404	0.000596166
	10	133	8	22.0008	25.2295	1.40191	43.0059	1.63353	4.87073	-19.2022	214.948	0.999999	1.10664e-06	0.998196	0.00180374
	10	133	9	47.8637	12.1313	1.08391	28.292	1.45166	5.67308	-7.21534	198.978	0.999898	0.000101745	0.997214	0.00278647
	10	134	1	0.361215	0.327872	-0.484296	111.587	2.04761	61.5888	-22.9672	148.039	0.000206339	0.999794	0.979785	0.020215
	10	134	2	1.03363	0.377886	-0.422639	101.474	2.00636	46.2443	-21.0804	209.773	0.000472392	0.999528	0.996477	0.00352273
	10	134	3	1.88387	0.439015	-0.357521	111.93	2.04895	49.4224	-15.1379	101.692	0.000496757	0.999503	0.867596	0.132404
	10	134	4	2.88416	0.322315	-0.49172	231.795	2.3651	111.529	-6.92919	184.851	6.34071e-06	0.999994	0.653844	0.346156
	10	134	5	6.95755	0.533486	-0.272877	92.292	1.96516	43.4311	-18.4453	240.45	0.0020018	0.997998	0.999374	0.000626398
	10	134	6	17.9885	7.42435	0.870658	36.774	1.56554	10.7225	-21.0835	159.606	0.998678	0.00132219	0.99417	0.00583002
	10	134	7	38.5277	21.4673	1.33178	52.1821	1.71752	9.8724	-26.5846	313.823	0.999997	2.82526e-06	0.999998	1.53777e-06
	10	135	1	7.37434	0.450129	-0.346663	95.0386	1.9779	37.4665	-27.3883	192.667	0.00104754	0.998952	0.999132	0.000868101
	10	135	2	17.7718	0.694644	-0.158238	66.5058	1.82286	39.9216	-33.9678	270.368	0.0148031	0.985197	0.99999	9.74137e-06
	10	135	3	18.8221	0.672415	-0.172363	96.7809	1.98579	40.5196	-8.48247	85.4122	0.00364928	0.996351	0.672689	0.327311
	10	135	4	20.9227	9.70834	0.987145	30.3022	1.48147	7.13977	-20.8676	170.161	0.999678	0.000322316	0.994709	0.00529064
	10	135	5	31.2089	0.444572	-0.352058	108.483	2.03536	62.0069	-10.0376	75.7361	0.000588467	0.999412	0.459484	0.540516
	10	135	6	34.6377	25.3573	1.4041	31.9436	1.50438	0.370807	-30.7461	270.771	0.999999	1.37626e-06	0.999982	1.82048e-05
	10	136	1	0.177829	0.689086	-0.161726	56.5598	1.75251	18.3941	-21.7864	178.167	0.0244034	0.975597	0.995819	0.00418093
	10	136	2	7.09648	0.522372	-0.28202	79.1221	1.8983	36.1935	-31.167	208.871	0.00335372	0.996646	0.999854	0.00014614
	10	136	3	11.8867	0.722429	-0.141205	75.3273	1.87695	46.3777	-30.1689	225.976	0.0111006	0.988899	0.99979	0.000209527
	10	136	4	15.799	0.411229	-0.385916	105.234	2.02216	37.6597	-31.056	208.974	0.000522821	0.999477	0.99984	0.000160143
	10	136	5	18.3886	0.450129	-0.346663	80.5672	1.90616	47.8322	-27.2681	233.559	0.00201682	0.997983	0.999606	0.000394119
	10	136	6	19.4667	0.455686	-0.341334	61.2801	1.78732	25.0105	-18.4219	161.265	0.00592892	0.994071	0.984813	0.0151875
	10	136	7	22.1786	0.744658	-0.128043	61.0939	1.786	29.4944	-22.1442	255.131	0.0240953	0.975905	0.999835	0.000165132
	10	136	8	23.5012	36.4938	1.56222	40.1906	1.60412	5.89848	-11.2193	141.042	1	1.00695e-07	0.945893	0.0541072
	3	137	1	2.06731	1.35598	0.132252	130.782	2.11655	42.3389	-33.5738	220.098	0.0224905	0.977509	0.999947	5.25502e-05
	3	137	2	4.55697	0.333437	-0.476987	111.247	2.04629	62.3827	4.4674	28.4554	0.000219641	0.99978	0.124111	0.875889
	3	137	3	5.69065	0.333437	-0.476987	142.292	2.15318	78.2549	-24.3944	174.257	7.23689e-05	0.999928	0.974782	0.0252179
	3	137	4	7.50233	0.211177	-0.675354	176.495	2.24673	146.272	-14.5046	117.288	6.26948e-06	0.999994	0.00111779	0.998882
	3	137	5	18.628	41.3628	1.61661	39.618	1.59789	7.37153	-17.1881	196.136	1	4.32561e-08	0.994939	0.00506122
	3	138	1	2.56746	0.533499	-0.272867	164.406	2.21592	75.0189	-18.6453	147.307	0.000199412	0.999801	0.844213	0.155787
	3	138	2	3.84564	0.238963	-0.621669	206.641	2.31522	130.967	-27.6715	185.403	4.04435e-06	0.999996	0.598287	0.401713
	3	138	3	4.70146	0.172276	-0.763776	233.663	2.36859	161.217	-14.566	194.126	7.54936e-07	0.999999	0.00881462	0.991185
	3	138	4	5.05157	0.288978	-0.539135	161.052	2.20697	93.2319	-19.4225	235.427	2.57076e-05	0.999974	0.991555	0.00844502
	3	138	5	11.2035	0.311208	-0.50695	152.258	2.18258	94.4406	-20.3934	175.291	4.24538e-05	0.999958	0.809974	0.190026
	3	138	6	11.8648	0.222291	-0.653078	166.134	2.22046	138.294	-15.6176	129.694	9.94591e-06	0.99999	0.00515506	0.994845
	3	138	7	20.3619	10.4977	1.02109	57.0882	1.75655	11.2683	-32.6675	276.054	0.999761	0.00023911	0.999992	8.06751e-06
	3	138	8	40.8071	4.64033	0.666549	55.8936	1.74736	17.371	-30.0003	276.108	0.98056	0.01944	0.999985	1.54711e-05
	3	138	9	48.0816	11.9092	1.07588	32.3444	1.5098	9.22803	-8.4556	101.569	0.99989	0.000109746	0.85949	0.14051
	3	139	1	3.68448	0.75579	-0.121599	81.5926	1.91165	25.4343	-1.72977	186.552	0.00988877	0.990111	0.997918	0.00208247
	3	139	2	5.91294	1.28929	0.11035	88.6779	1.94782	26.7891	-13.8332	166.923	0.0549331	0.945067	0.972915	0.0270848
	3	139	3	7.81909	0.583514	-0.233949	94.6201	1.97598	64.6939	-14.7079	174.406	0.00244253	0.997557	0.928659	0.0713411
	3	139	4	10.1865	0.994753	-0.00228481	55.643	1.74541	24.4145	-23.1989	153.705	0.0772123	0.922788	0.996179	0.0038205
	3	139	5	11.6814	0.483483	-0.315619	95.1375	1.97835	54.399	-14.4314	139.608	0.00130205	0.998698	0.863065	0.136935
	3	139	6	12.7151	0.505712	-0.296096	99.7608	1.99896	49.1658	-15.1872	123.651	0.00124692	0.998753	0.87892	0.12108
	3	139	7	14.1988	0.589072	-0.229832	79.7157	1.90154	39.4569	-8.5872	151.841	0.00472674	0.995273	0.920717	0.0792829
	3	139	8	16.0327	2.54523	0.405728	78.9472	1.89734	40.4791	3.47026	113.254	0.608831	0.391169	0.879925	0.120075
	3	139	9	19.3504	0.539056	-0.268366	98.061	1.9915	34.337	-14.1933	96.3098	0.00164154	0.998358	0.911354	0.0886461
	3	139	10	20.5508	0.355666	-0.448958	107.082	2.02972	56.534	-14.0609	94.6273	0.000313678	0.999686	0.765867	0.234133
	3	139	11	30.0149	29.976	1.47677	36.8676	1.56664	6.03399	-14.5133	220.01	1	4.12294e-07	0.998475	0.00152528
	3	140	1	2.85088	0.227848	-0.642354	126.851	2.10329	61.4049	-1.35857	76.1118	4.12323e-05	0.999959	0.247287	0.752713
	3	140	2	4.41248	0.894722	-0.048312	141.444	2.15058	52.1833	-11.5968	232.138	0.00284595	0.997154	0.999233	0.000767083
	3	140	3	9.22508	0.255635	-0.59238	182.888	2.26219	156.982	-2.76969	48.2816	9.34142e-06	0.999991	1.16976e-05	0.999988
	3	140	4	10.4588	0.272307	-0.564942	161.741	2.20882	111.875	-10.9882	149.409	2.09128e-05	0.999979	0.102618	0.897382
	3	140	5	11.8481	0.255635	-0.59238	181.243	2.25826	148.549	-10.7673	98.5713	9.77464e-06	0.99999	0.000274827	0.999725
	3	140	6	23.0016	1.08367	0.0348968	60.1632	1.77933	21.0163	-32.4559	270.479	0.0825287	0.917471	0.999989	1.14195e-05
	3	140	7	26.1248	0.461254	-0.33606	83.9274	1.9239	53.3743	-17.7582	135.708	0.00184575	0.998154	0.927912	0.072088
	3	140	8	27.453	0.533499	-0.272867	97.73	1.99003	34.7248	-12.5028	166.036	0.00160748	0.998393	0.96313	0.0368697
	3	140	9	28.9979	0.238963	-0.621669	158.229	2.19929	120.278	-13.0732	127.478	1.57219e-05	0.999984	0.0232618	0.976738
	3	140	10	30.026	0.36678	-0.435594	136.988	2.13668	82.6797	-23.4156	187.322	0.000116646	0.999883	0.967863	0.032137
	3	140	11	34.9608	0.227848	-0.642354	152.999	2.18469	119.809	-5.66437	56.6897	1.6218e-05	0.999984	0.00204561	0.997954
	3	140	12	36.4446	23.5462	1.37192	53.9502	1.73199	6.98088	-21.8601	258.935	0.999998	1.50819e-06	0.999879	0.000121416
	5	141	1	1.61713	0.494586	-0.305758	99.642	1.99844	53.144	-17.4143	137.278	0.00116605	0.998834	0.923753	0.076247
	5	141	2	4.74025	0.400115	-0.397815	102.953	2.01264	51.3129	-29.0324	223.322	0.000527114	0.999473	0.999603	0.000397348
	5	141	3	5.47935	0.489029	-0.310665	97.2433	1.98786	45.8788	-22.5257	188.757	0.00123818	0.998762	0.994296	0.00570353
	5	141	4	10.1974	0.605729	-0.217721	81.3895	1.91057	40.2534	-28.7722	255.283	0.0047919	0.995208	0.999918	8.1762e-05
	5	141	5	11.2032	0.739101	-0.131296	63.8798	1.80536	29.9508	-15.6377	178.154	0.0204484	0.979552	0.983733	0.0162666
	5	141	6	18.0941	13.5372	1.13153	34.4195	1.5368	8.39578	-30.6738	193.04	0.999946	5.36156e-05	0.999886	0.00011386
	5	141	7	45.5019	11.8812	1.07486	32.5316	1.51231	4.63887	-17.663	145.568	0.999889	0.000111079	0.983932	0.0160682
	5	142	1	4.10673	0.650186	-0.186962	70.5317	1.84838	30.0576	-31.4412	210.831	0.00989784	0.990102	0.999893	0.000106668
	5	142	2	8.00229	0.933601	-0.0298387	59.4051	1.77382	32.594	-7.05245	278.146	0.0530045	0.946995	0.999999	9.07063e-07
	5	142	3	18.5887	41.4008	1.61701	44.517	1.64853	8.57221	-24.1433	175.389	1	3.69784e-08	0.998181	0.00181914
	2	143	1	2.33961	0.472369	-0.325719	76.8558	1.88568	39.2279	-22.3561	165.505	0.002782	0.997218	0.992446	0.00755418
	2	143	2	4.99044	0.722446	-0.141194	69.2802	1.84061	31.3315	-28.8309	253.779	0.0146424	0.985358	0.999928	7.22347e-05
	2	143	3	6.32418	2.29516	0.360812	53.0122	1.72438	16.2139	-13.1586	138.705	0.685295	0.314705	0.948491	0.0515094
	2	143	4	9.26398	1.16147	0.0650084	75.8428	1.87991	37.4958	-32.3883	249.441	0.0566892	0.943311	0.999965	3.54466e-05
	2	143	5	14.8768	0.261192	-0.58304	152.255	2.18257	92.7317	-21.0475	164.29	2.47481e-05	0.999975	0.801776	0.198224
	2	143	6	27.1028	0.666873	-0.175957	69.8896	1.84441	49.3059	-27.6026	180.572	0.0110488	0.988951	0.998551	0.00144858
	2	143	7	45.4085	11.6147	1.06501	73.9763	1.86909	16.8099	-32.2963	234.073	0.999857	0.000142931	0.999961	3.9377e-05
	6	144	1	7.90782	0.405672	-0.391825	166.569	2.22159	58.8751	-7.82741	239.644	6.85748e-05	0.999931	0.999825	0.000174794
	6	144	2	10.1085	0.244515	-0.611695	215.512	2.33347	179.73	8.52712	15.9374	3.50718e-06	0.999996	2.37771e-07	1
	6	144	3	11.8367	0.344543	-0.462756	130.162	2.11448	97.8268	-1.40067	122.308	0.000120238	0.99988	0.148262	0.851738
	6	144	4	23.1955	36.7994	1.56584	37.9753	1.5795	3.468	-15.3801	229.81	1	1.01861e-07	0.999154	0.000845537
	6	145	1	1.4393	0.539043	-0.268376	93.6437	1.97148	28.7999	-29.3451	198.994	0.00195811	0.998042	0.999711	0.000288535
	6	145	2	3.02865	0.4279	-0.368657	83.959	1.92407	31.5173	-27.4308	245.178	0.00148089	0.998519	0.999851	0.000148878
	6	145	3	5.34042	0.772444	-0.112133	75.2015	1.87623	28.795	-23.1308	169.337	0.0139349	0.986065	0.995971	0.00402856
	6	145	4	6.40739	0.489029	-0.310665	148.395	2.17142	46.431	-22.9086	211.827	0.000221387	0.999779	0.997606	0.00239392
	6	145	5	8.94145	0.577943	-0.238115	88.1759	1.94535	39.6431	-15.9371	211.405	0.00307598	0.996924	0.996135	0.00386462
	6	145	6	9.8306	0.261186	-0.58305	154.78	2.18972	99.7878	-18.7964	175.39	2.28329e-05	0.999977	0.676791	0.323209
	6	145	7	10.5753	0.600172	-0.221724	79.7267	1.9016	35.3283	-21.487	180.737	0.00501142	0.994989	0.993629	0.00637103
	6	145	8	11.4922	0.405672	-0.391825	105.084	2.02154	25.9138	-28.6419	226.491	0.000504452	0.999496	0.999801	0.00019873
	6	145	9	17.1382	42.8567	1.63202	37.6056	1.57525	2.92636	-18.8832	136.742	1	3.62977e-08	0.988562	0.0114385
	6	146	1	1.75606	0.533486	-0.272877	70.6663	1.84921	35.9663	-10.7134	133.43	0.00541745	0.994583	0.877524	0.122476
	6	146	2	3.6566	4.69579	0.671709	69.6739	1.84307	12.7866	-12.4801	251.856	0.975886	0.0241142	0.999905	9.53363e-05
	6	146	3	11.5644	0.322315	-0.49172	139.051	2.14317	75.464	-15.8519	188.449	7.23112e-05	0.999928	0.939577	0.0604234
	6	146	4	12.4369	0.461243	-0.33607	97.8736	1.99067	49.9884	-37.5592	327.585	0.00100388	0.998996	1	1.67848e-07
	6	146	5	13.4372	0.322315	-0.49172	125.7	2.09933	68.5757	-33.2583	238.692	0.000114781	0.999885	0.999878	0.000121809
	6	146	6	14.0207	0.4279	-0.368657	91.0711	1.95938	54.4807	-34.2994	236.09	0.001068	0.998932	0.999955	4.45397e-05
	6	146	7	25.2684	0.527929	-0.277424	90.6015	1.95714	49.4212	-14.2454	265.512	0.00207744	0.997923	0.99995	4.99835e-05
	6	146	8	26.5187	33.4763	1.52474	46.3726	1.66626	9.33988	-24.2436	225.891	1	1.5569e-07	0.99947	0.000530085
	0.5	147	1	0.844706	0.866935	-0.0620132	99.4371	1.99755	36.5236	-5.30447	126.628	0.00838214	0.991618	0.827746	0.172254
	0.5	147	2	5.10158	0.266749	-0.573897	191.769	2.28278	146.613	-18.9454	168.364	8.44254e-06	0.999992	0.0140752	0.985925
	0.5	147	3	8.2859	0.133375	-0.874927	264.009	2.42162	245.645	-5.72763	63.2467	1.76478e-07	1	3.33586e-12	1
	0.5	147	4	8.77494	0.372338	-0.429063	170.572	2.23191	121.839	-2.63527	75.241	4.55462e-05	0.999954	0.00191491	0.998085
	0.5	147	5	12.4594	0.544613	-0.263912	136.264	2.13438	83.3979	-15.4138	164.143	0.000465433	0.999535	0.742163	0.257837
	0.5	147	6	13.393	0.355666	-0.448958	134.458	2.12859	102.301	-21.2307	155.264	0.000114861	0.999885	0.606646	0.393354
	0.5	147	7	14.7212	0.655759	-0.183256	97.9273	1.9909	47.2588	-16.3447	150.831	0.00320402	0.996796	0.941261	0.0587387
	0.5	147	8	17.9889	0.350109	-0.455797	124.574	2.09543	73.5714	-13.6096	131.11	0.000153775	0.999846	0.598507	0.401493
	0.5	147	9	18.778	1.40043	0.146263	67.1958	1.82734	26.8469	-13.9876	202.801	0.147264	0.852736	0.995105	0.00489455
	0.5	147	10	20.7286	0.361223	-0.442224	107.718	2.03229	83.5748	-8.35826	129.922	0.000320049	0.99968	0.312682	0.687318
	0.5	147	11	21.8623	0.422353	-0.374324	127.141	2.10429	97.4116	-13.0038	104.813	0.000256252	0.999744	0.112767	0.887233
	0.5	147	12	22.7515	0.533499	-0.272867	104.611	2.01958	58.2328	-16.9094	172.854	0.00123515	0.998765	0.954393	0.0456073
	0.5	147	13	23.8741	1.39488	0.144536	50.9014	1.70673	17.0037	1.11526	183.377	0.255158	0.744842	0.999019	0.00098132
	0.5	147	14	27.0528	0.639087	-0.19444	81.1549	1.90932	33.5256	-22.8662	171.526	0.00575562	0.994244	0.9951	0.00489986
	0.5	147	15	28.2588	8.31369	0.919794	59.5473	1.77486	14.2149	-13.5311	168.44	0.999061	0.000938543	0.978653	0.021347
	0.5	147	16	41.0016	16.0161	1.20456	73.6214	1.867	16.0981	-24.743	254.502	0.999982	1.80879e-05	0.999876	0.000124223
	0.5	147	17	58.4737	0.505712	-0.296096	100.199	2.00086	69.3564	-22.2557	236.112	0.00122566	0.998774	0.99813	0.00186977
	0.5	147	18	59.4684	0.389009	-0.41004	120.258	2.08011	77.2659	-19.3393	200.379	0.000249417	0.999751	0.971768	0.0282322
	0.5	148	1	0.655759	0.338994	-0.469808	153.275	2.18547	124.136	-6.34792	45.0192	5.42219e-05	0.999946	0.00130588	0.998694
	0.5	148	2	1.38932	0.394567	-0.403879	120.996	2.08277	81.6486	-13.0447	97.2502	0.000254099	0.999746	0.308391	0.691609
	0.5	148	3	6.65206	0.250078	-0.601925	165.039	2.21759	104.625	-14.6257	124.591	1.45866e-05	0.999985	0.116111	0.883889
	0.5	148	4	8.94722	0.238963	-0.621669	210.464	2.32318	159.173	-14.0536	108.477	3.67846e-06	0.999996	0.000148174	0.999852
	0.5	148	5	9.45293	0.272307	-0.564942	178.776	2.25231	130.504	-7.4786	125.162	1.27906e-05	0.999987	0.00525644	0.994744
	0.5	148	6	10.6144	0.272307	-0.564942	185.098	2.2674	160.498	5.00206	22.6342	1.07689e-05	0.999989	3.80335e-06	0.999996
	0.5	148	7	12.7151	0.372338	-0.429063	153.492	2.18609	113.562	-9.72429	72.3447	7.35806e-05	0.999926	0.00934301	0.990657
	0.5	148	8	15.8271	0.300093	-0.522744	160.287	2.2049	89.8854	2.31777	111.033	2.96467e-05	0.99997	0.249645	0.750355
	0.5	148	9	18.1056	0.372338	-0.429063	127.265	2.10471	32.0027	-11.3818	167.307	0.000169614	0.99983	0.966393	0.0336071
	0.5	148	10	20.1451	0.400124	-0.397805	139.564	2.14477	71.6763	-9.60378	136.714	0.000143064	0.999857	0.575813	0.424187
	0.5	148	11	21.7012	0.461254	-0.33606	109.757	2.04043	63.7973	-17.4641	143.207	0.000631563	0.999368	0.883222	0.116778
	0.5	148	12	22.8849	0.18339	-0.736624	198.458	2.29767	185.83	0.446798	16.1298	2.23113e-06	0.999998	6.00233e-08	1
	0.5	148	13	23.8796	0.494598	-0.305748	99.4	1.99739	55.225	-18.9297	165.349	0.00117738	0.998823	0.964308	0.0356923
	0.5	148	14	25.0633	0.533499	-0.272867	68.9012	1.83823	40.8168	-19.2525	154.391	0.00593919	0.994061	0.97729	0.0227103
	0.5	148	15	26.4304	0.255635	-0.59238	162.039	2.20962	149.454	-3.90461	38.8868	1.70776e-05	0.999983	3.28561e-05	0.999967
	0.5	148	16	33.7494	0.689103	-0.161716	79.7222	1.90158	32.4466	-17.0757	176.94	0.00784042	0.99216	0.984708	0.0152916
	0.5	148	17	35.7111	0.489041	-0.310655	106.343	2.02671	80.535	-7.12572	73.9474	0.000868108	0.999132	0.113087	0.886913
	0.5	148	18	36.5613	0.311208	-0.50695	120.597	2.08134	69.1983	-19.4867	147.005	0.000124919	0.999875	0.907331	0.0926685
	0.5	148	19	37.9673	0.522384	-0.28201	105.355	2.02265	56.0899	-24.5141	209.381	0.0011199	0.99888	0.997279	0.00272148
	0.5	148	20	39.1899	0.51127	-0.29135	90.1297	1.95487	58.7149	-17.2008	135.925	0.00191529	0.998085	0.8937	0.1063
	0.5	148	21	40.4681	0.611301	-0.213745	97.6722	1.98977	64.3032	-16.1313	117.352	0.00253907	0.997461	0.791646	0.208354
	0.5	148	22	44.0414	0.622415	-0.20592	90.0166	1.95432	56.0571	-16.023	142.844	0.00363971	0.99636	0.89308	0.10692
	0.5	148	23	47.0257	12.8095	1.10753	67.7569	1.83095	12.1393	-22.6167	195.585	0.999925	7.51863e-05	0.9979	0.00209965
	0.5	149	1	0.728003	0.288978	-0.539134	177.542	2.2493	159.128	-2.51777	42.7314	1.6034e-05	0.999984	7.59712e-06	0.999992
	0.5	149	2	1.57827	0.277864	-0.556168	171.971	2.23545	163.67	-0.911396	36.2268	1.65119e-05	0.999983	3.11585e-06	0.999997
	0.5	149	3	2.73974	0.327879	-0.484286	168.648	2.22698	94.1896	-2.76629	119.736	3.11084e-05	0.999969	0.143074	0.856926
	0.5	149	4	3.60667	0.639087	-0.19444	96.5865	1.98492	20.9086	-3.54703	175.886	0.00308109	0.996919	0.992576	0.00742367
	0.5	149	5	6.4909	0.294536	-0.530862	212.507	2.32737	131.992	-7.42406	137.668	7.06289e-06	0.999993	0.0086946	0.991305
	0.5	149	6	10.8978	0.233406	-0.631889	211.381	2.32507	189.292	-4.9585	49.7741	3.33339e-06	0.999997	9.63265e-08	1
	0.5	149	7	11.687	0.361223	-0.442224	164.236	2.21547	138.737	3.12669	39.5456	4.87953e-05	0.999951	0.000105664	0.999894
	0.5	149	8	13.6376	0.350109	-0.455797	146.212	2.16498	126.055	2.77155	27.3617	7.47788e-05	0.999925	0.000371274	0.999629
	0.5	149	9	14.7546	0.327879	-0.484286	156.336	2.19406	137.331	1.85473	42.618	4.43689e-05	0.999956	0.000129858	0.99987
	0.5	149	10	16.4329	0.344551	-0.462746	167.73	2.22461	103.923	3.38625	48.361	3.77039e-05	0.999962	0.00670308	0.993297
	0.5	149	11	18.289	0.294536	-0.530862	194.902	2.28982	166.914	-6.55943	112.743	1.08228e-05	0.999989	3.0809e-05	0.999969
	0.5	149	12	23.0294	0.444582	-0.352048	88.0172	1.94457	43.9361	-24.6155	182.762	0.00137174	0.998628	0.996638	0.00336192
	0.5	149	13	25.5746	0.444582	-0.352048	138.752	2.14224	54.4414	-19.9643	164.679	0.000209959	0.99979	0.972197	0.0278033
	0.5	149	14	26.3582	0.477926	-0.320639	121.015	2.08284	74.5408	-10.0307	126.382	0.000476445	0.999524	0.444996	0.555004
	0.5	149	15	29.1646	0.583514	-0.233949	88.9769	1.94928	36.2324	-7.88365	155.894	0.00306912	0.996931	0.941083	0.0589167
	0.5	149	16	30.8651	0.889165	-0.0510179	65.3822	1.81546	30.907	-16.421	175.66	0.034353	0.965647	0.983255	0.0167453
	0.5	149	17	34.4607	25.5301	1.40705	66.6318	1.82368	10.6167	-35.4197	241.08	0.999999	7.78106e-07	0.999991	8.57301e-06
	2	150	1	0.411229	0.222286	-0.653088	224.671	2.35155	182.995	2.13591	119.184	2.0678e-06	0.999998	1.84936e-05	0.999982
	2	150	2	5.51825	0.294529	-0.530872	199.389	2.2997	124.375	-3.68468	147.141	9.67632e-06	0.99999	0.0533717	0.946628
	2	150	3	6.35182	0.188943	-0.723669	240.24	2.38065	198.505	7.31532	31.1074	8.58851e-07	0.999999	1.607e-08	1
	2	150	4	6.88531	0.216729	-0.664083	200.255	2.30158	183.781	-4.26949	45.1819	3.50184e-06	0.999996	2.05124e-07	1
	2	150	5	8.54689	8.35795	0.9221	44.3104	1.64651	12.4946	-7.90628	212.774	0.999223	0.000777312	0.998913	0.00108709
	2	150	6	19.4278	0.816901	-0.0878307	81.3813	1.91052	33.4871	-22.3553	180.599	0.0130476	0.986952	0.995165	0.00483492
	2	150	7	32.2926	0.600172	-0.221724	49.9196	1.69827	21.467	-16.6441	243.467	0.0248909	0.975109	0.999664	0.000336181
	2	150	8	34.7711	0.1945	-0.71108	155.743	2.19241	88.5988	1.64866	114.318	9.54774e-06	0.99999	0.279142	0.720858
	2	150	9	42.8956	17.0993	1.23298	45.0742	1.65393	11.4235	-14.5292	264.332	0.999987	1.26539e-05	0.999955	4.49618e-05
	2	151	1	1.72827	0.577943	-0.238115	90.9069	1.9586	41.6209	-5.24493	146.845	0.00274701	0.997253	0.912109	0.0878909
	2	151	2	5.90169	0.4668	-0.330869	104.435	2.01885	81.2166	-21.492	150.283	0.000803064	0.999197	0.892367	0.107633
	2	151	3	8.01341	0.666858	-0.175967	73.3206	1.86523	35.7049	-21.603	146.736	0.00938865	0.990611	0.990096	0.00990413
	2	151	4	12.4258	1.21702	0.0852961	54.6005	1.7372	33.4792	-9.46452	91.0661	0.149839	0.850161	0.771998	0.228002
	2	151	5	16.4047	0.161157	-0.79275	145.398	2.16256	97.2901	-16.4189	145.801	8.48753e-06	0.999992	0.377875	0.622125
	2	151	6	20.7671	0.716872	-0.144558	74.819	1.87401	40.0226	-18.2388	169.658	0.0110708	0.988929	0.980099	0.0199007
	2	151	7	29.125	0.377886	-0.422639	113.621	2.05546	49.9756	-22.3838	235.064	0.00029116	0.999709	0.999091	0.000908974
	2	151	8	33.5818	0.122257	-0.912725	148.75	2.17246	102.216	-9.1986	142.663	3.97598e-06	0.999996	0.159708	0.840292
	2	151	9	40.5005	19.4945	1.28991	43.3917	1.63741	8.77947	-36.1777	262.704	0.999994	5.70039e-06	0.999996	3.83715e-06
	2	152	1	0	0.288972	-0.539145	175.848	2.24514	150.685	-9.27743	71.33	1.67989e-05	0.999983	0.00158144	0.998419
	2	152	2	0.850244	0.294529	-0.530872	175.259	2.24368	141.231	-11.4688	91.3637	1.81674e-05	0.999982	0.000672256	0.999328
	2	152	3	2.00057	0.300086	-0.522754	143.386	2.15651	75.3576	-21.6884	153.905	5.02514e-05	0.99995	0.933197	0.0668035
	2	152	4	2.86749	0.327872	-0.484296	172.061	2.23568	97.4323	-4.644	141.571	2.83028e-05	0.999972	0.265673	0.734327
	2	152	5	5.47379	0.3112	-0.50696	116.792	2.06741	71.0448	-7.28745	125.227	0.000144524	0.999855	0.462279	0.537721
	2	152	6	6.40739	0.489029	-0.310665	107.431	2.03113	34.1011	-10.2582	161.947	0.000833413	0.999167	0.954944	0.0450564
	2	152	7	8.04675	0.405672	-0.391825	138.904	2.14271	63.7572	-16.8168	162.778	0.000152964	0.999847	0.916435	0.0835654
	2	152	8	11.0365	0.550158	-0.259513	94.2017	1.97406	38.7416	-18.9169	198.786	0.0020456	0.997954	0.993909	0.00609127
	2	152	9	12.0312	0.389	-0.41005	116.653	2.0669	89.3425	-20.0053	132.075	0.00028435	0.999716	0.692096	0.307904
	2	152	10	12.9871	0.383443	-0.416299	103.369	2.01439	69.2846	-15.2552	104.377	0.000456045	0.999544	0.670781	0.329219
	2	152	11	15.7879	0.905815	-0.0429604	73.9348	1.86885	25.6571	-2.6106	167.836	0.0252714	0.974729	0.988645	0.0113554
	2	152	12	20.7226	8.74695	0.941857	42.9181	1.63264	5.50693	-23.6691	189.54	0.999399	0.000600913	0.998285	0.00171547
	2	152	13	29.9086	0.355658	-0.448968	103.521	2.01503	70.9078	-10.9212	107.285	0.000363172	0.999637	0.415504	0.584496
	2	152	14	36.0437	1.22257	0.0872747	49.1415	1.69145	10.0425	-34.9213	247.734	0.19046	0.80954	0.999991	9.42309e-06
	2	152	15	41.6619	10.7698	1.03221	49.5	1.6946	12.1126	-18.4261	234.17	0.999803	0.000197412	0.999347	0.000652762
	2	152	16	53.0597	0.355658	-0.448968	143.291	2.15622	82.9067	-19.6165	141.346	8.62497e-05	0.999914	0.785237	0.214763
	2	152	17	56.5884	0.255629	-0.59239	128.42	2.10863	62.6456	-33.5163	210.794	5.30794e-05	0.999947	0.999852	0.000147521
	2	152	18	58.9447	0.494586	-0.305758	73.012	1.86339	33.8102	-23.388	220.228	0.00385685	0.996143	0.998926	0.0010738
	2	153	1	2.82859	0.294529	-0.530872	99.0026	1.99565	41.479	-13.9912	182.325	0.000261728	0.999738	0.979465	0.0205353
	2	153	2	4.49573	0.327872	-0.484296	99.5922	1.99823	40.0705	-33.3695	229.227	0.000341131	0.999659	0.999954	4.56798e-05
	2	153	3	6.51854	0.316757	-0.499273	151.933	2.18165	70.2414	-26.7413	200.539	4.53626e-05	0.999955	0.996025	0.00397494
	2	153	4	7.11315	0.2334	-0.631899	209.185	2.32053	130.468	-13.6242	96.7602	3.51926e-06	0.999996	0.00426486	0.995735
	2	153	5	8.30238	0.527929	-0.277424	84.2427	1.92553	34.5175	-28.5301	207.988	0.00273748	0.997263	0.9996	0.000399792
	2	153	6	12.9759	0.161157	-0.79275	233.298	2.36791	186.119	-15.6226	116.602	6.24958e-07	0.999999	4.57294e-06	0.999995
	2	153	7	15.7434	0.400115	-0.397815	98.7504	1.99454	52.4463	-29.3808	210.526	0.000627431	0.999373	0.999478	0.000521543
	2	153	8	16.8826	0.722429	-0.141205	80.8742	1.90781	45.1077	-25.3122	200.938	0.00874022	0.99126	0.998119	0.00188107
	2	153	9	20.0224	0.333429	-0.476997	129.315	2.11165	47.1911	-30.2055	188.718	0.000111884	0.999888	0.999596	0.00040391
	2	153	10	28.197	17.4328	1.24137	43.0716	1.63419	7.21827	-33.227	260.813	0.999989	1.14104e-05	0.999987	1.25488e-05
	2	153	11	49.0418	0.150043	-0.823784	303.93	2.48277	280.64	-4.67265	53.0981	1.09154e-07	1	7.74708e-16	1
	2	153	12	51.9982	0.539043	-0.268376	86.8112	1.93858	45.9281	-37.825	270.092	0.00260918	0.997391	0.999997	2.75458e-06
	2	153	13	53.4487	0.411229	-0.385916	121.062	2.08301	63.8086	-15.514	161.031	0.000289425	0.999711	0.895268	0.104732
	2	153	14	55.0713	4.92363	0.692286	43.9669	1.64313	18.2528	-24.01	206.516	0.98876	0.0112404	0.998825	0.0011746
	1	154	1	0	0.444582	-0.352048	146.429	2.16563	120.614	-2.28302	57.6865	0.00016674	0.999833	0.0152166	0.984783
	1	154	2	0.889165	0.383452	-0.416289	147.778	2.16961	84.2102	3.47944	53.5569	9.63231e-05	0.999904	0.0432054	0.956795
	1	154	3	3.76783	0.250078	-0.601925	175.575	2.24446	137.5	0.826869	57.7943	1.07042e-05	0.999989	0.000192486	0.999808
	1	154	4	5.09602	0.389009	-0.41004	126.248	2.10122	90.7874	-10.0136	101.331	0.000202045	0.999798	0.111312	0.888688
	1	154	5	11.7703	0.316765	-0.499263	163.524	2.21358	136.481	-5.64313	71.2551	3.2106e-05	0.999968	0.000361994	0.999638
	1	154	6	15.8605	0.42791	-0.368647	108.43	2.03515	44.6348	-6.04035	134.9	0.0005224	0.999478	0.831319	0.168681
	1	154	7	16.8997	43.0967	1.63444	47.032	1.67239	4.67113	-19.2377	160.771	1	2.59209e-08	0.990899	0.00910056
	1	155	1	0	0.311208	-0.50695	185.221	2.26769	155.135	2.71591	21.9025	1.67036e-05	0.999983	0.00104224	0.998958
	1	155	2	2.21735	0.283421	-0.547568	143.423	2.15662	97.2288	0.831037	54.2058	4.21852e-05	0.999958	0.0129816	0.987018
	1	155	3	7.7913	0.311208	-0.50695	158.431	2.19984	78.9449	-15.6466	156.063	3.52031e-05	0.999965	0.74667	0.25333
	1	155	4	9.05836	0.394567	-0.403879	113.016	2.05314	70.8656	-24.4594	179.223	0.000340421	0.99966	0.985895	0.0141047
	1	155	5	10.7811	0.222291	-0.653078	200.021	2.30108	159.83	-12.5761	137.303	3.81072e-06	0.999996	0.00030973	0.99969
	1	155	6	13.0318	0.333437	-0.476987	128.594	2.10922	36.6257	-15.1074	203.091	0.000114759	0.999885	0.994116	0.00588442
	1	155	7	13.7154	0.372338	-0.429063	155.045	2.19046	83.658	4.98503	120.507	7.03095e-05	0.99993	0.673013	0.326987
	1	155	8	15.8327	0.355666	-0.448958	111.224	2.0462	57.0308	-13.3033	128.431	0.000265898	0.999734	0.781148	0.218852
	1	155	9	16.7441	0.311208	-0.50695	125.855	2.09987	78.2989	-10.5651	128.178	0.000102777	0.999897	0.407789	0.592211
	1	155	10	17.4776	0.311208	-0.50695	137.341	2.1378	99.4148	0.0415061	108.006	6.87079e-05	0.999931	0.0779451	0.922055
	1	155	11	18.3501	0.333437	-0.476987	129.982	2.11388	91.1074	1.98236	49.3206	0.000109313	0.999891	0.0204527	0.979547
	1	155	12	24.0575	0.705774	-0.151334	142.79	2.1547	57.1308	-13.5986	188.155	0.00104139	0.998959	0.973229	0.0267715
	1	155	13	25.0633	0.361223	-0.442224	144.733	2.16057	81.133	-20.1057	179.172	8.67225e-05	0.999913	0.92342	0.0765797
	1	155	14	25.7246	0.24452	-0.611685	180.788	2.25717	101.225	-5.00172	161.162	8.61544e-06	0.999991	0.489738	0.510262
	1	155	15	31.0263	0.200062	-0.698835	143.168	2.15584	124.217	-1.06671	49.2202	1.59131e-05	0.999984	0.000737211	0.999263
	1	155	16	33.566	0.272307	-0.564942	166.292	2.22087	110.642	-25.1197	162.611	1.82604e-05	0.999982	0.744093	0.255907
	1	155	17	37.306	0.311208	-0.50695	127.857	2.10672	51.5439	-32.8198	242.355	9.55967e-05	0.999904	0.99994	5.97222e-05
	1	155	18	42.8133	0.24452	-0.611685	168.541	2.22671	124.181	-19.6434	204.342	1.22692e-05	0.999988	0.539744	0.460256
	1	155	19	43.3801	0.355666	-0.448958	133.518	2.12554	91.5369	-20.1686	185.382	0.00011853	0.999881	0.882384	0.117616
	1	155	20	45.1473	0.461254	-0.33606	109.798	2.04059	35.5669	-27.8008	179.334	0.000630604	0.999369	0.999213	0.000786949
	1	155	21	45.992	0.700217	-0.154767	73.2157	1.8646	25.6768	-19.7285	170.361	0.0110293	0.988971	0.990483	0.00951711
	1	155	22	47.9149	0.138932	-0.857198	297.299	2.47319	278.232	-1.59088	39.7787	9.81576e-08	1	7.50022e-16	1
	1	155	23	48.3928	0.127817	-0.89341	287.735	2.45899	269.807	-9.6945	64.1009	9.32661e-08	1	2.46493e-14	1
	1	156	1	0	0.127817	-0.89341	165.086	2.21771	146.948	2.69676	15.8851	2.42719e-06	0.999998	0.002165	0.997835
	1	156	2	3.35104	0.383452	-0.416289	141.508	2.15078	96.9718	-7.74675	111.376	0.0001168	0.999883	0.0726153	0.927385
	1	156	3	8.1692	1.25039	0.0970447	82.913	1.91862	28.1881	-15.1692	272.85	0.0585428	0.941457	0.999978	2.1732e-05
	1	156	4	14.8546	0.30565	-0.514775	176.724	2.24729	158.696	0.208068	51.1965	1.97152e-05	0.99998	9.20983e-06	0.999991
	1	156	5	17.1386	1.27817	0.10659	51.3221	1.7103	21.3903	-18.3256	167.526	0.197328	0.802672	0.987437	0.0125631
	1	156	6	19.3004	4.18463	0.621657	65.5563	1.81661	21.5219	-13.0121	124.327	0.960541	0.0394586	0.927127	0.0728733
	1	156	7	26.4193	0.161161	-0.79274	232.238	2.36593	173.858	-4.47008	125.575	6.41319e-07	0.999999	2.85964e-05	0.999971
	1	156	8	28.72	0.316765	-0.499263	133.094	2.12416	92.5776	-20.7132	194.128	8.38502e-05	0.999916	0.917595	0.0824052
	1	156	9	35.9389	9.95864	0.9982	38.466	1.58508	9.32601	7.22539	50.6097	0.99971	0.000289797	0.721241	0.278759
	1	156	10	48.3928	0.989196	-0.00471784	97.4732	1.98889	37.1494	-16.9282	189.184	0.0148155	0.985184	0.989028	0.0109718
	1	156	11	50.6435	2.01729	0.304769	61.0975	1.78602	18.1311	-26.7841	246.647	0.48698	0.51302	0.999865	0.000134748
	1	156	12	53.3777	0.839149	-0.0761609	132.947	2.12368	54.5548	-6.12831	192.317	0.00271658	0.997283	0.991894	0.00810624
	1	156	13	56.5286	0.233406	-0.631889	193.256	2.28613	149.217	-16.1187	124.676	5.30292e-06	0.999995	0.00128877	0.998711
	1	156	14	57.6123	0.233406	-0.631889	178.055	2.25055	157.772	-15.5778	113.025	8.07082e-06	0.999992	0.000276441	0.999724
	1	156	15	58.6182	0.233406	-0.631889	221.901	2.34616	135.421	-11.6486	181.221	2.5868e-06	0.999997	0.0725213	0.927479
	1	156	16	59.135	0.166718	-0.778017	232.256	2.36597	208.235	-10.327	79.9541	7.08242e-07	0.999999	1.45486e-08	1
	5	157	1	0	0.200062	-0.698835	178.245	2.25102	154.912	-8.90777	64.2983	5.09124e-06	0.999995	0.00106544	0.998935
	5	157	2	1.3004	0.177833	-0.749988	207.116	2.31621	179.844	-2.42061	40.1673	1.6167e-06	0.999998	2.99895e-07	1
	5	157	3	5.47948	0.394567	-0.403879	120.898	2.08242	60.3465	-25.1655	256.554	0.000254988	0.999745	0.999742	0.000257723
	5	157	4	6.87435	0.377895	-0.422629	155.603	2.19202	84.564	-19.791	213.995	7.27466e-05	0.999927	0.979931	0.0200691
	5	157	5	8.89165	0.18339	-0.736624	291.071	2.464	224.014	-0.73177	135.712	2.67246e-07	1	4.36276e-08	1
	5	157	6	9.38624	0.166718	-0.778017	263.615	2.42097	213.116	-11.3969	100.726	3.45835e-07	1	1.35366e-08	1
	5	157	7	9.88084	0.639087	-0.19444	211.436	2.32518	67.7956	1.28888	229.041	0.000146031	0.999854	0.999983	1.66521e-05
	5	157	8	11.7203	0.589072	-0.229832	83.8809	1.92366	36.6844	-27.3478	167.918	0.00392929	0.996071	0.99898	0.00101958
	5	157	9	13.9432	0.36678	-0.435594	99.8446	1.99932	52.4625	-12.5438	170.679	0.000463835	0.999536	0.945856	0.0541439
	5	157	10	16.8441	0.539056	-0.268366	74.1915	1.87035	37.2538	-10.3465	190.631	0.00467615	0.995324	0.989588	0.0104124
	5	157	11	18.0612	0.550171	-0.259503	98.6868	1.99426	34.8979	-33.39	227.995	0.00171359	0.998286	0.99996	3.99056e-05
	5	157	12	19.6617	0.811363	-0.090785	68.7423	1.83722	28.6782	-23.7199	169.84	0.0218441	0.978156	0.996724	0.00327611
	5	157	13	21.0121	0.972524	-0.0120998	70.1373	1.84595	25.4888	-16.0036	147.005	0.0377557	0.962244	0.96682	0.0331803
	5	157	14	23.7073	0.889165	-0.0510179	68.1338	1.83336	34.8664	-24.5679	180.798	0.0303788	0.969621	0.997424	0.00257634
	5	157	15	26.8694	0.561285	-0.250816	89.2119	1.95042	43.1524	-32.7	246.229	0.0026795	0.99732	0.999959	4.14261e-05
	5	157	16	28.1254	0.639087	-0.19444	88.312	1.94602	21.728	-31.032	194.403	0.00426007	0.99574	0.999881	0.000119059
	5	157	17	30.1594	14.8324	1.17121	55.5599	1.74476	12.841	-35.0574	225.745	0.999971	2.94395e-05	0.999988	1.24768e-05
	5	157	18	45.1862	1.53381	0.185771	133.138	2.1243	58.8414	-24.6074	303.308	0.0372762	0.962724	0.999994	5.72321e-06
	5	157	19	47.2869	0.45014	-0.346653	123.031	2.09002	60.2707	-18.2052	180.921	0.00036379	0.999636	0.968698	0.0313024
	5	157	20	48.1483	0.533499	-0.272867	103.278	2.01401	64.0007	-15.3656	151.681	0.00129828	0.998702	0.859303	0.140697
	5	157	21	49.1764	10.8145	1.034	41.8177	1.62136	11.126	-6.12079	194.298	0.999813	0.00018674	0.996845	0.00315516
	5	158	1	0	0.294536	-0.530862	135.267	2.13119	100.028	6.92607	18.7406	6.24364e-05	0.999938	0.312461	0.687539
	5	158	2	3.71226	0.772462	-0.112123	126.237	2.10119	54.343	-7.70044	298.31	0.0023472	0.997653	1	9.92683e-08
	5	158	3	6.55203	0.461254	-0.33606	114.653	2.05939	58.9766	-26.2488	217.732	0.000528227	0.999472	0.998522	0.00147763
	5	158	4	8.35815	0.266749	-0.573897	204.275	2.31021	92.8338	13.8051	55.5784	6.14657e-06	0.999994	0.208487	0.791513
	5	158	5	9.20285	0.566842	-0.246538	99.3287	1.99707	38.1619	-42.1385	280.638	0.00184666	0.998153	1	2.15379e-07
	5	158	6	10.042	0.477926	-0.320639	82.9156	1.91864	42.2655	-14.9354	224.808	0.00214976	0.99785	0.998372	0.00162828
	5	158	7	11.7036	0.900279	-0.0456228	76.7174	1.88489	34.5387	-25.4753	180.914	0.0220906	0.977909	0.998137	0.00186312
	5	158	8	13.8154	1.28929	0.11035	60.6145	1.78258	33.222	-18.1252	212.649	0.141676	0.858324	0.997098	0.00290169
	5	158	9	15.8105	0.822477	-0.0848761	78.3455	1.89401	25.94	-3.82388	152.35	0.0151054	0.984895	0.962074	0.0379264
	5	158	10	19.695	0.266749	-0.573897	159.713	2.20334	122.598	-4.01062	89.9668	2.08753e-05	0.999979	0.00288176	0.997118
	5	158	11	21.2844	1.03921	0.0167038	43.4442	1.63793	17.0395	-32.2107	218.848	0.160021	0.839979	0.999947	5.3376e-05
	5	158	12	24.4465	0.75579	-0.121599	79.6377	1.90112	35.3868	-20.2464	149.358	0.0107217	0.989278	0.984988	0.0150124
	5	158	13	25.8024	14.3878	1.15799	43.5461	1.63895	12.4515	-19.3948	252.574	0.999964	3.61525e-05	0.99981	0.000189634
	5	158	14	41.7129	7.06886	0.849349	47.6096	1.67769	11.4918	-25.9755	304.918	0.998032	0.00196818	0.999997	3.26395e-06
	5	158	15	49.432	1.81723	0.25941	63.5765	1.8033	24.5513	-19.6475	161.567	0.360123	0.639877	0.988867	0.0111327
	5	158	16	52.2106	0.811363	-0.090785	78.635	1.89562	40.9089	-10.3383	103.061	0.0142434	0.985757	0.760678	0.239322
	5	158	17	53.7055	6.28528	0.798325	41.9614	1.62285	11.1378	-16.4137	139.884	0.996708	0.00329157	0.974984	0.0250156
	5	159	1	5.10158	0.24452	-0.611685	242.214	2.3842	151.004	-5.21814	153.055	1.90996e-06	0.999998	0.00364901	0.996351
	5	159	2	6.18525	0.211177	-0.675354	253.745	2.4044	208.311	0.608607	140.453	9.10965e-07	0.999999	1.52392e-06	0.999998
	5	159	3	6.70764	0.494598	-0.305748	107.018	2.02946	18.9625	-10.6245	314.506	0.000878404	0.999122	1	3.74661e-08
	5	159	4	7.93579	0.700217	-0.154767	82.6116	1.91704	42.4823	-34.628	279.972	0.00731744	0.992683	0.999995	5.39842e-06
	5	159	5	10.8812	0.188947	-0.723659	198.211	2.29713	163.185	-21.956	154.817	2.44994e-06	0.999998	0.00195779	0.998042
	5	159	6	11.4647	0.255635	-0.59238	208.489	2.31908	168.603	-3.95403	65.422	4.81334e-06	0.999995	3.52206e-06	0.999996
	5	159	7	13.6042	0.238963	-0.621669	191.332	2.28179	163.954	-6.99756	103.769	6.00908e-06	0.999994	3.04957e-05	0.99997
	5	159	8	14.5101	0.288978	-0.539134	184.065	2.26497	169.491	2.75992	18.9869	1.34433e-05	0.999987	8.32128e-07	0.999999
	5	159	9	15.088	0.361223	-0.442224	150.294	2.17694	95.8936	-8.43399	118.779	7.31295e-05	0.999927	0.102722	0.897278
	5	159	10	17.2331	0.255635	-0.59238	223.584	2.34944	175.513	-4.43542	66.5326	3.36483e-06	0.999997	1.3056e-06	0.999999
	5	159	11	18.6113	0.255635	-0.59238	175.79	2.24499	158.83	-5.58034	57.3903	1.13901e-05	0.999989	1.38973e-05	0.999986
	5	159	12	20.8898	0.355666	-0.448958	151.629	2.18078	111.575	-11.2519	82.8669	6.67288e-05	0.999933	0.0171308	0.982869
	5	159	13	23.8963	0.42791	-0.368647	155.002	2.19034	112.511	-5.571	80.3637	0.000113889	0.999886	0.0065566	0.993443
	5	159	14	26.147	0.30565	-0.514775	176.078	2.2457	162.838	0.285975	117.975	2.00655e-05	0.99998	0.000175485	0.999825
	5	159	15	27.3363	0.389009	-0.41004	152.202	2.18242	91.2517	-3.27078	84.7249	8.86652e-05	0.999911	0.0463807	0.953619
	5	159	16	30.6484	0.350109	-0.455797	163.382	2.2132	111.598	-12.5496	93.558	4.49506e-05	0.999955	0.0250396	0.97496
	5	159	17	33.6382	0.322322	-0.49171	161.214	2.2074	125.653	-0.0114111	86.218	3.63416e-05	0.999964	0.0022059	0.997794
	5	159	18	37.6172	0.672431	-0.172352	93.8423	1.9724	47.9507	-10.3099	150.438	0.00407575	0.995924	0.889401	0.110599
	5	159	19	39.1733	20.8176	1.31843	44.0303	1.64375	10.6494	-17.1057	130.246	0.999996	3.74479e-06	0.978145	0.0218545
	5	160	1	1.49491	0.327879	-0.484286	163.828	2.21439	112.404	-9.79409	113.49	3.56487e-05	0.999964	0.0228879	0.977112
	5	160	2	2.20068	0.211177	-0.675354	207.343	2.31669	182.913	-6.67254	48.7595	2.69041e-06	0.999997	3.46331e-07	1
	5	160	3	9.60853	0.583514	-0.233949	82.2767	1.91528	51.932	-29.4063	248.577	0.00409012	0.99591	0.999863	0.000136987
	5	160	4	12.9207	0.772462	-0.112123	71.0929	1.85183	46.5603	-31.6892	240.389	0.0167155	0.983284	0.99992	7.98142e-05
	5	160	5	15.0269	34.1161	1.53296	44.1659	1.64509	10.2637	-45.9239	306.396	1	1.43716e-07	1	1.06154e-08
	5	160	6	51.2159	8.77494	0.943244	49.8517	1.69768	13.0505	-36.2445	274.986	0.999371	0.000629077	0.999997	2.57296e-06
	3	161	1	0.511258	0.405672	-0.391825	110.407	2.043	67.3006	-3.47671	206.848	0.000409788	0.99959	0.998302	0.00169833
	3	161	2	1.30037	0.261186	-0.58305	195.107	2.29027	138.515	-15.313	128.65	7.22868e-06	0.999993	0.00460548	0.995395
	3	161	3	2.97307	0.322315	-0.49172	156.497	2.19451	85.9734	-27.119	211.279	4.17677e-05	0.999958	0.99329	0.00670986
	3	161	4	5.81833	0.322315	-0.49172	172.962	2.23795	87.2659	-7.27035	213.461	2.60741e-05	0.999974	0.992401	0.00759929
	3	161	5	6.79084	0.205614	-0.686946	200.354	2.3018	137.354	13.8287	15.129	2.97421e-06	0.999997	0.00030513	0.999695
	3	161	6	8.36907	0.91693	-0.037664	169.452	2.22905	84.0276	-8.89095	256.984	0.00166158	0.998338	0.999903	9.68329e-05
	3	161	7	11.2755	0.122257	-0.912725	250.555	2.3989	237.589	0.376214	31.4056	1.89246e-07	1	4.96693e-12	1
	3	161	8	11.8645	0.216729	-0.664083	217.41	2.33728	160.283	-15.4232	221.976	2.26945e-06	0.999998	0.0884182	0.911582
	3	161	9	14.4375	0.250072	-0.601935	160.715	2.20606	144.713	-23.6515	224.568	1.66448e-05	0.999983	0.432929	0.567071
	3	161	10	16.2158	0.238957	-0.62168	220.348	2.34311	197.181	-5.94755	65.376	2.89833e-06	0.999997	4.04056e-08	1
	3	161	11	16.7826	0.238957	-0.62168	195.1	2.29026	175.634	-7.95041	64.6313	5.43697e-06	0.999995	1.75526e-06	0.999998
	3	161	12	18.5664	0.261186	-0.58305	191.868	2.283	174.137	-5.73444	86.7692	7.86398e-06	0.999992	3.38202e-06	0.999997
	3	161	13	19.0666	0.200057	-0.698845	218.515	2.33948	169.703	-5.03471	72.0611	1.71952e-06	0.999998	3.84734e-06	0.999996
	3	161	14	19.6834	0.422343	-0.374334	118.032	2.072	76.1878	-26.1205	231.25	0.000351234	0.999649	0.998001	0.00199922
	3	161	15	20.956	0.283415	-0.547578	126.151	2.10089	93.0897	-23.0537	201.931	7.73462e-05	0.999923	0.958456	0.0415437
	3	161	16	22.1341	0.200057	-0.698845	232.717	2.36683	211.946	-5.09881	62.7989	1.22312e-06	0.999999	2.50778e-09	1
	3	161	17	23.3289	0.1945	-0.71108	238.244	2.37702	224.523	-8.28711	124.632	9.84762e-07	0.999999	4.93205e-09	1
	3	161	18	23.9513	0.188943	-0.723669	171.573	2.23445	108.375	-17.9372	130.495	5.30104e-06	0.999995	0.181217	0.818783
	3	161	19	26.452	0.244515	-0.611695	179.42	2.25387	152.752	4.10755	116.567	8.95222e-06	0.999991	0.00162387	0.998376
	3	161	20	27.5468	0.188943	-0.723669	169.176	2.22834	128.381	6.08066	48.9246	5.71149e-06	0.999994	0.000709306	0.999291
	3	161	21	31.7146	2.54517	0.405717	48.3118	1.68405	14.4364	-13.3447	114.721	0.799403	0.200597	0.937212	0.0627881
	3	161	22	39.0001	20.9949	1.32211	42.0251	1.62351	5.39379	-17.0343	145.546	0.999996	3.64143e-06	0.98105	0.0189497
	3	162	1	0	0.0555715	-1.25515	244.545	2.38836	213.869	-11.3281	41.6123	3.67364e-08	1	1.14875e-07	1
	3	162	2	0.3112	0.283415	-0.547578	180.251	2.25588	138.768	-12.7654	116.595	1.39764e-05	0.999986	0.00205975	0.99794
	3	162	3	1.65047	0.216729	-0.664083	233.672	2.36861	175.55	-13.0597	115.317	1.54576e-06	0.999998	1.44261e-05	0.999986
	3	162	4	1.9839	0.772444	-0.112133	190.292	2.27942	62.0668	3.97845	194.422	0.00050603	0.999494	0.999777	0.000222725
	3	162	5	3.83443	0.1945	-0.71108	247.363	2.39334	183.652	-14.0691	138.796	8.01435e-07	0.999999	1.25523e-05	0.999987
	3	162	6	5.38488	0.227843	-0.642364	161.012	2.20686	132.214	5.33935	16.0575	1.25313e-05	0.999987	0.00015144	0.999849
	3	162	7	7.23541	0.200057	-0.698845	139.561	2.14476	109.964	-15.1457	120.489	1.81354e-05	0.999982	0.0746832	0.925317
	3	162	8	13.7373	0.222286	-0.653088	242.048	2.3839	196.766	-11.814	96.8741	1.39141e-06	0.999999	2.22107e-07	1
	3	162	9	14.2374	0.300086	-0.522754	203.182	2.30788	121.716	-0.831499	160.994	9.40252e-06	0.999991	0.311228	0.688772
	3	162	10	15.0488	0.316757	-0.499273	144.137	2.15878	79.3507	-14.1598	194.115	5.79971e-05	0.999942	0.943608	0.0563918
	3	162	11	16.1213	32.6538	1.51393	55.4936	1.74424	4.89636	0.967283	174.884	1	1.56532e-07	0.997842	0.00215802
	3	162	12	52.6651	0.372329	-0.429073	136.964	2.13661	83.5899	-22.6382	214.93	0.000122568	0.999877	0.986988	0.013012
	3	162	13	53.1764	0.0444572	-1.35206	200.737	2.30263	91.7923	-35.7382	208.624	9.95763e-08	1	0.999673	0.000327344
	3	162	14	53.6821	0.227843	-0.642364	195.338	2.29079	157.289	-5.74725	94.0864	4.65407e-06	0.999995	5.00618e-05	0.99995
	3	162	15	54.3434	0.250072	-0.601935	158.077	2.19887	96.7433	-20.4393	152.355	1.80693e-05	0.999982	0.652124	0.347876
	3	162	16	54.9435	0.677972	-0.168788	167.542	2.22412	122.387	-12.5182	131.108	0.000477934	0.999522	0.0198554	0.980145
	3	162	17	56.0216	1.01696	0.0073031	161.883	2.2092	30.4409	-8.98006	250.777	0.00309932	0.996901	0.999955	4.45035e-05
	3	162	18	59.945	0.0500143	-1.30091	138.085	2.14015	99.9994	-32.4469	202.422	1.45123e-06	0.999999	0.996565	0.0034353
	3	163	1	0	0.283415	-0.547578	164.046	2.21497	87.8704	-15.8217	109.001	2.21205e-05	0.999978	0.510003	0.489997
	3	163	2	2.37846	0.205614	-0.686946	213.842	2.33009	143.119	-18.034	151.663	2.10183e-06	0.999998	0.00932038	0.99068
	3	163	3	3.28427	0.1945	-0.71108	262.095	2.41846	189.98	-3.6583	90.5018	5.82584e-07	0.999999	3.45577e-07	1
	3	163	4	3.78442	0.316757	-0.499273	115.828	2.06381	72.664	-27.9285	223.63	0.00015794	0.999842	0.998509	0.00149122
	3	163	5	4.42905	0.4668	-0.330869	121.116	2.0832	35.2542	-22.119	212.804	0.000438548	0.999561	0.998092	0.00190815
	3	163	6	5.25151	0.2723	-0.564952	164.929	2.2173	72.5733	-21.3206	172.316	1.90097e-05	0.999981	0.956464	0.0435356
	3	163	7	7.34655	0.511258	-0.29136	122.468	2.08802	64.7651	-13.4839	148.477	0.000571819	0.999428	0.805155	0.194845
	3	163	8	11.1921	0.383443	-0.416299	102.683	2.0115	73.1708	-27.1559	181.447	0.000469089	0.999531	0.993865	0.00613456
	3	163	9	15.0988	0.944715	-0.0246991	80.3562	1.90502	31.6421	-39.0634	249.687	0.0227284	0.977272	0.999998	1.69507e-06
	3	163	10	16.7604	14.3374	1.15647	47.465	1.67637	4.89351	-8.66711	157.167	0.999963	3.65545e-05	0.964813	0.0351868
	3	163	11	32.6205	0.316757	-0.499273	170.961	2.2329	88.6657	-0.582642	113.852	2.60032e-05	0.999974	0.19894	0.80106
	3	163	12	34.0431	0.266743	-0.573907	208.794	2.31972	137.452	2.78175	105.336	5.50318e-06	0.999994	0.00290444	0.997096
	3	163	13	35.7936	0.205614	-0.686946	255.649	2.40764	186.038	-1.65777	101.118	8.01035e-07	0.999999	1.39986e-06	0.999999
	3	163	14	36.4771	0.277857	-0.556178	195.714	2.29162	119.424	-0.0598714	133.699	8.72198e-06	0.999991	0.0682311	0.931769
	3	163	15	37.8831	0.288972	-0.539145	190.179	2.27916	118.386	9.98205	5.32131	1.14518e-05	0.999989	0.000932535	0.999067
	3	163	16	40.456	0.261186	-0.58305	189.67	2.278	93.3413	-26.593	202.979	8.33264e-06	0.999992	0.982541	0.0174588
	3	163	17	41.6897	0.461243	-0.33607	113.403	2.05463	58.246	-18.3111	236.381	0.000552494	0.999448	0.998683	0.00131714
	3	163	18	44.0071	0.250072	-0.601935	190.371	2.2796	47.3022	-19.3327	273.725	7.11643e-06	0.999993	0.999953	4.73171e-05
	3	163	19	45.4352	0.3112	-0.50696	131.853	2.12009	66.8396	-32.0422	213.164	8.29619e-05	0.999917	0.999655	0.000345391
	3	163	20	46.1188	0.944715	-0.0246991	100.679	2.00294	49.1455	-31.1949	253.814	0.0111811	0.988819	0.999939	6.06449e-05
	3	163	21	51.1869	8.80808	0.944881	61.9373	1.79195	16.8372	-11.161	202.021	0.999309	0.000690854	0.996064	0.0039363
	3	164	1	0	0.1556	-0.80799	167.046	2.22284	152.766	-0.600792	17.5803	3.6596e-06	0.999996	0.00130902	0.998691
	3	164	2	3.95113	0.622401	-0.20593	118.377	2.07327	58.6914	-25.4122	248.985	0.00131462	0.998685	0.999623	0.000376721
	3	164	3	5.01811	0.166714	-0.778027	287.782	2.45906	243.917	-13.2561	97.688	2.09286e-07	1	3.93972e-11	1
	3	164	4	5.88502	0.283415	-0.547578	181.636	2.2592	144.083	-1.96677	176.325	1.34615e-05	0.999987	0.125596	0.874404
	3	164	5	14.7765	3.37319	0.528041	54.723	1.73817	17.726	-33.465	308.345	0.91817	0.0818304	0.999999	1.09358e-06
	3	164	6	19.4222	0.439015	-0.357521	148.291	2.17112	113.69	-0.540374	51.4068	0.000151071	0.999849	0.00242703	0.997573
	3	164	7	25.8574	1.49487	0.174604	63.5422	1.80306	28.0074	-21.1499	232.008	0.204492	0.795508	0.999273	0.000726677
	3	164	8	28.3859	30.3698	1.48244	53.827	1.731	10.8451	-2.05447	181.97	1	2.66812e-07	0.996948	0.00305226
	3	164	9	59.467	0.455686	-0.341334	81.3578	1.9104	39.7902	-6.79377	204.34	0.00201147	0.997989	0.997715	0.00228514
	0.3	165	1	0.533499	0.18339	-0.736624	270.863	2.43275	234.331	6.42393	18.0445	4.00879e-07	1	8.8454e-12	1
	0.3	165	2	1.0281	0.211177	-0.675354	236.459	2.37376	216.543	-1.33841	43.5702	1.33362e-06	0.999999	4.92622e-10	1
	0.3	165	3	2.50078	0.505712	-0.296096	270.104	2.43153	154.086	-7.7751	161.693	1.84928e-05	0.999982	0.00329373	0.996706
	0.3	165	4	3.33437	0.172276	-0.763776	306.053	2.4858	259.64	-0.726131	77.5297	1.63339e-07	1	3.95464e-13	1
	0.3	165	5	4.30689	0.238963	-0.621669	239.799	2.37985	160.029	-13.2374	152.786	1.86197e-06	0.999998	0.000686966	0.999313
	0.3	165	6	7.91356	0.211177	-0.675354	243.591	2.38666	215.821	-6.55684	70.7254	1.13626e-06	0.999999	1.75493e-09	1
	0.3	165	7	9.7697	0.161161	-0.79274	223.874	2.35	195.181	-5.8118	107.975	7.889e-07	0.999999	3.36626e-07	1
	0.3	165	8	10.2087	0.166718	-0.778017	274.223	2.4381	231.864	-11.2809	128.59	2.76075e-07	1	1.54275e-09	1
	0.3	165	9	11.2646	0.133375	-0.874927	273.94	2.43765	183.529	-4.67282	113.114	1.41679e-07	1	3.06607e-06	0.999997
	0.3	165	10	11.6536	0.155604	-0.80798	285.739	2.45597	264.953	-0.445292	43.7851	1.75545e-07	1	2.02377e-14	1
	0.3	165	11	13.3152	0.172276	-0.763776	270.835	2.43271	217.409	-2.09687	65.4552	3.28561e-07	1	9.58057e-10	1
	0.3	165	12	14.2044	0.155604	-0.80798	225.45	2.35305	198.552	-9.03994	75.8231	6.85591e-07	0.999999	6.0017e-08	1
	0.3	165	13	17.2831	0.216734	-0.664073	243.129	2.38584	182.888	-6.2937	78.5524	1.24984e-06	0.999999	6.67343e-07	0.999999
	0.3	165	14	17.8166	0.150047	-0.823774	244.097	2.38756	224.994	-5.61357	54.2354	3.91922e-07	1	1.67821e-10	1
	0.3	165	15	18.3446	0.255635	-0.59238	246.58	2.39196	213.615	-5.28656	84.3005	2.02777e-06	0.999998	4.28321e-09	1
	0.3	165	16	18.9503	0.12226	-0.912715	126.026	2.10046	52.5469	-4.53166	209.067	1.01137e-05	0.99999	0.998868	0.00113174
	0.3	165	17	19.506	0.589072	-0.229832	219.749	2.34193	102.642	3.96653	136.081	8.77563e-05	0.999912	0.559315	0.440685
	0.3	165	18	20.5397	0.472369	-0.325719	216.115	2.33468	131.431	-15.8014	140.431	3.80147e-05	0.999962	0.016268	0.983732
	0.3	165	19	21.44	0.24452	-0.611685	222.861	2.34803	191.07	0.982908	71.7327	2.94835e-06	0.999997	1.64748e-07	1
	0.3	165	20	23.7685	0.277864	-0.556168	170.069	2.23063	128.868	1.45829	75.4168	1.74347e-05	0.999983	0.00111187	0.998888
	0.3	165	21	24.9966	0.272307	-0.564942	195.115	2.29029	136.185	-5.87519	71.3857	8.28417e-06	0.999992	0.000384697	0.999615
	0.3	165	22	26.0692	0.566842	-0.246538	175.051	2.24316	104.82	0.457253	68.899	0.000194534	0.999805	0.00958582	0.990414
	0.3	165	23	28.1143	0.24452	-0.611685	197.664	2.29593	137.316	-14.256	94.7205	5.47077e-06	0.999995	0.00213231	0.997868
	0.3	165	24	29.109	0.288978	-0.539134	218.8	2.34005	170.749	6.13627	9.69611	5.71619e-06	0.999994	6.20445e-07	0.999999
	0.3	165	25	29.8815	0.227848	-0.642354	185.968	2.26944	161.421	9.21758	53.0598	6.00088e-06	0.999994	2.62776e-05	0.999974
	0.3	165	26	30.8318	0.200062	-0.698835	186.203	2.26999	154.194	-7.72166	77.0928	4.04268e-06	0.999996	5.12395e-05	0.999949
	0.3	165	27	32.16	0.350109	-0.455797	166.733	2.22202	113.986	4.10097	67.1748	4.09226e-05	0.999959	0.00536932	0.994631
	0.3	165	28	33.1825	0.261192	-0.58304	205.368	2.31253	178.738	-5.38182	75.4736	5.57962e-06	0.999994	1.10076e-06	0.999999
	0.3	165	29	33.8494	0.205619	-0.686936	167.179	2.22318	151.581	-1.82535	35.7386	7.69872e-06	0.999992	1.88112e-05	0.999981
	0.3	165	30	34.8997	0.294536	-0.530862	176.57	2.24692	123.356	4.60266	86.8536	1.75243e-05	0.999982	0.00631542	0.993685
	0.3	165	31	36.2001	0.138932	-0.857198	170.811	2.23252	93.6919	17.4737	20.8897	2.43928e-06	0.999998	0.117536	0.882464
	0.3	165	32	36.7003	0.216734	-0.664073	150.482	2.17748	90.4636	-8.35931	166.964	1.53237e-05	0.999985	0.666394	0.333606
	0.3	165	33	38.3397	0.472369	-0.325719	92.8771	1.96791	60.0169	-7.97704	84.6867	0.00133164	0.998668	0.401056	0.598944
	0.3	165	34	39.5345	0.338994	-0.469808	136.66	2.13564	81.9529	-3.24648	109.764	9.16887e-05	0.999908	0.19873	0.80127
	0.3	165	35	40.3847	0.389009	-0.41004	124.584	2.09546	70.563	6.14458	97.434	0.000214034	0.999786	0.580215	0.419785
	0.3	165	36	41.9519	0.405681	-0.391815	124.656	2.09571	62.5516	-17.4211	175.509	0.000244392	0.999756	0.952521	0.0474791
	0.3	165	37	42.8411	0.266749	-0.573897	180.965	2.25759	125.426	-17.3145	126.752	1.12737e-05	0.999989	0.0295523	0.970448
	0.3	165	38	43.7914	0.211177	-0.675354	186.231	2.27005	166.711	5.89985	13.8091	4.73724e-06	0.999995	1.26344e-06	0.999999
	0.3	165	39	44.3971	0.283421	-0.547568	185.22	2.26769	142.357	3.2989	59.3788	1.223e-05	0.999988	0.000138167	0.999862
	0.3	165	40	45.3641	0.311208	-0.50695	134.391	2.12837	102.99	-13.7552	120.312	7.59756e-05	0.999924	0.105348	0.894652
	0.3	165	41	46.62	0.288978	-0.539134	144.891	2.16104	74.0908	-21.0346	187.468	4.26228e-05	0.999957	0.968229	0.0317713
	0.3	165	42	49.7599	0.194505	-0.71107	167.924	2.22511	142.995	1.20123	85.7222	6.43609e-06	0.999994	0.000338019	0.999662
	0.3	165	43	54.0556	0.300093	-0.522744	171.968	2.23545	144.387	-7.57656	54.2072	2.1164e-05	0.999979	0.000134277	0.999866
	0.3	165	44	56.5731	0.227848	-0.642354	216.015	2.33448	190.287	-4.48226	62.9753	2.7543e-06	0.999997	1.09446e-07	1
	0.3	165	45	58.2625	0.477926	-0.320639	233.194	2.36772	181.322	-6.35981	80.2312	2.83337e-05	0.999972	9.08223e-07	0.999999
	0.3	165	46	59.0628	0.222291	-0.653078	254.548	2.40577	214.007	-8.21681	72.1744	1.06259e-06	0.999999	3.03264e-09	1
	0.5	166	1	6.38516	0.183386	-0.736634	238.661	2.37778	205.039	-7.18821	80.7282	8.11748e-07	0.999999	1.8495e-08	1
	0.5	166	2	6.96866	0.200057	-0.698845	223.28	2.34885	203.951	-5.75457	80.8961	1.53053e-06	0.999998	2.09741e-08	1
	0.5	166	3	7.66331	0.389	-0.41005	184.181	2.26525	80.2927	-13.4797	237.448	3.74389e-05	0.999963	0.997946	0.0020544
	0.5	166	4	9.44715	0.166714	-0.778027	269.27	2.43019	247.626	-12.8015	82.4137	3.06371e-07	1	1.02284e-11	1
	0.5	166	5	10.7364	0.455686	-0.341334	79.4262	1.89996	49.0811	-21.0487	172.578	0.002209	0.997791	0.985884	0.0141164
	0.5	166	6	12.5258	0.700201	-0.154777	94.5428	1.97563	30.9314	-10.4467	167.481	0.00457162	0.995428	0.967521	0.0324788
	0.5	166	7	22.0508	0.261186	-0.58305	163.852	2.21445	106.323	-27.7707	176.484	1.72584e-05	0.999983	0.937203	0.062797
	0.5	166	8	22.5565	0.333429	-0.476997	134.382	2.12834	86.2646	-30.3058	200.507	9.39722e-05	0.999906	0.996918	0.0030819
	0.5	166	9	23.4678	0.416786	-0.380087	103.983	2.01696	45.0511	-30.9115	270.851	0.000572705	0.999427	0.999975	2.5129e-05
	0.5	166	10	24.3625	0.411229	-0.385916	115	2.0607	78.3905	-8.84189	98.546	0.000360004	0.99964	0.211357	0.788643
	0.5	166	11	25.5407	3.31762	0.520826	59.8043	1.77673	22.4732	-22.5091	221.169	0.900274	0.0997262	0.999021	0.000979354
	0.5	166	12	31.5868	0.150043	-0.823784	131.969	2.12047	93.7731	-2.29132	148.811	1.21023e-05	0.999988	0.537667	0.462333
	0.5	166	13	32.8539	2.4118	0.382342	48.0176	1.6814	12.7661	-16.6568	215.198	0.763089	0.236911	0.99791	0.00208998
	0.5	166	14	37.1384	0.577943	-0.238115	88.3111	1.94602	54.149	-26.9308	209.963	0.00305859	0.996941	0.998712	0.00128804
	0.5	166	15	38.0442	0.766887	-0.115269	94.6861	1.97629	20.8361	-11.1827	256.888	0.00628714	0.993713	0.999957	4.26655e-05
	0.5	166	16	41.134	0.811344	-0.0907951	58.5847	1.76778	32.2316	-5.13627	67.8832	0.0356284	0.964372	0.620644	0.379356
	0.5	166	17	46.2188	0.794672	-0.099812	70.257	1.84669	33.5583	-13.9798	114.333	0.0190508	0.980949	0.908045	0.0919549
	0.5	166	18	49.6198	0.539043	-0.268376	66.3437	1.8218	35.9197	-31.0698	268.906	0.00701191	0.992988	0.999978	2.18012e-05
	0.5	166	19	53.7376	0.572386	-0.242311	93.5563	1.97107	51.8783	-26.1225	223.347	0.00239058	0.997609	0.999085	0.000914668
	0.5	166	20	56.0883	3.90668	0.591807	60.5352	1.78201	17.7402	-17.6186	226.858	0.950975	0.0490254	0.998942	0.00105769
	0.5	167	1	0	0.266743	-0.573907	118.485	2.07366	89.4006	-0.753254	45.8939	8.75866e-05	0.999912	0.483265	0.516735
	0.5	167	2	2.07837	0.172272	-0.763786	204.833	2.3114	109.895	-28.8177	214.942	1.56787e-06	0.999998	0.977846	0.0221545
	0.5	167	3	3.1509	0.111143	-0.954118	305.266	2.48468	273.904	-9.0462	125.001	4.35159e-08	1	1.99135e-13	1
	0.5	167	4	4.21232	0.105586	-0.976394	263.825	2.42132	179.034	15.9089	127.127	9.35859e-08	1	0.0614324	0.938568
	0.5	167	5	4.5513	0.188943	-0.723669	264.645	2.42266	231.911	-6.01408	57.8461	5.02592e-07	0.999999	4.87297e-11	1
	0.5	167	6	9.41937	0.516815	-0.286665	89.867	1.9536	40.7308	-27.8236	206.931	0.00200366	0.997996	0.999367	0.000632722
	0.5	167	7	10.2863	0.211172	-0.675364	199.559	2.30007	116.619	-2.84761	147.515	3.29368e-06	0.999997	0.125	0.875
	0.5	167	8	11.4088	0.705758	-0.151344	70.6334	1.84901	27.3153	-39.0647	321.321	0.0127515	0.987248	1	1.18258e-07
	0.5	167	9	13.7762	0.533486	-0.272877	67.4299	1.82885	24.1323	-23.8253	246.032	0.00642093	0.993579	0.999763	0.000237491
	0.5	167	10	16.2102	0.288972	-0.539145	75.3004	1.8768	47.9745	-12.3078	184.572	0.000837229	0.999163	0.977239	0.0227608
	0.5	167	11	17.3272	0.494586	-0.305758	100.65	2.00281	50.2053	-14.048	172.302	0.00112063	0.998879	0.956496	0.0435039
[truncated: 4,578 more rows]
