# Supplementary material for: Accept–reject decision-making revealed via a quantitative and ethological study of C. elegans foraging
Source: eLife. 2025 Sep 10;13:RP103191. doi: 10.7554/eLife.103191 (PMC12422737; doi:10.7554/eLife.103191)
Supplement: Figure 2—source data 11. [file elife-103191-fig2-data11.xlsx]

## Sheet: Sheet1
Figure 2 - Source Data 11
Figure 2M - Probability of an encounter type over time
Summary Statistics
	label	OD600	growth time (hr)	# worms	p(search|on patch)	p(sample|on patch)	p(exploit|on patch)	p(on patch)		* mean probabilities of having an encounter of each type (search, sample, and exploit) are given
	0	0	1	30	0.943636	0.056183	0.000181458	0.114964		* mean probability of being on patch is also shown
	0.2	0.05	1	23	0.913092	0.0858397	0.00106804	0.105726
	0.3	0.1	1	25	0.857181	0.129581	0.0132384	0.132756
	0.5	0.5	1	35	0.297187	0.266581	0.436232	0.250492
	1	1	1	46	0.152366	0.252663	0.594972	0.393156
	2	2	1	44	0.0957109	0.186263	0.718026	0.488235
	3	3	1	48	0.100735	0.192942	0.706322	0.488327
	5	4	1	44	0.0865361	0.199287	0.714176	0.516915
	6	5	1	50	0.0753407	0.163353	0.761306	0.577689
	10	10	1	50	0.0253363	0.130578	0.844085	0.708791
	50	1	12	20	0.00455305	0.0169696	0.978477	0.963593
	200	1	48	28	0.000389024	0.00213005	0.997481	0.991626
Source Data
	label	time (min)	p(search|on patch)	p(sample|on patch)	p(exploit|on patch)	p(on patch)		* probabilities of having an encounter of each type (search, sample, and exploit) are given
	0	0	0.699061	0.300821	0.000117931	0.0666667		* probability of being on patch is also shown
	0	0.0166667	0.699061	0.300821	0.000117931	0.0666667		* probability values shown in Figure 2M are smoothed using a moving mean filter for improved legibility
	0	0.0333333	0.699061	0.300821	0.000117931	0.0666667
	0	0.05	0.699061	0.300821	0.000117931	0.0666667
	0	0.0666667	0.675385	0.324474	0.000140809	0.0555556
	0	0.0833333	0.580681	0.419087	0.000232321	0.0333333
	0	0.1	0.684229	0.31558	0.000190965	0.0444444
	0	0.116667	0.787778	0.212073	0.000149609	0.0666667
	0	0.133333	0.840833	0.159055	0.000112289	0.0888889
	0	0.15	0.858518	0.141382	9.98493e-05	0.1
	0	0.166667	0.872666	0.127244	9.01387e-05	0.111111
	0	0.183333	0.893887	0.106038	7.55727e-05	0.133333
	0	0.2	0.893887	0.106038	7.55727e-05	0.133333
	0	0.216667	0.869509	0.130423	6.78259e-05	0.155556
	0	0.233333	0.859758	0.140177	6.47271e-05	0.166667
	0	0.25	0.859758	0.140177	6.47271e-05	0.166667
	0	0.266667	0.859758	0.140177	6.47271e-05	0.166667
	0	0.283333	0.859758	0.140177	6.47271e-05	0.166667
	0	0.3	0.859758	0.140177	6.47271e-05	0.166667
	0	0.316667	0.838183	0.161743	7.46344e-05	0.144444
	0	0.333333	0.824698	0.175221	8.08264e-05	0.133333
	0	0.35	0.824698	0.175221	8.08264e-05	0.133333
	0	0.366667	0.824698	0.175221	8.08264e-05	0.133333
	0	0.383333	0.824698	0.175221	8.08264e-05	0.133333
	0	0.4	0.824699	0.17522	8.05642e-05	0.133333
	0	0.416667	0.8247	0.17522	8.04331e-05	0.133333
	0	0.433333	0.8247	0.17522	8.04331e-05	0.133333
	0	0.45	0.8247	0.17522	8.04331e-05	0.133333
	0	0.466667	0.8247	0.17522	8.04331e-05	0.133333
	0	0.483333	0.8247	0.17522	8.04331e-05	0.133333
	0	0.5	0.838164	0.161762	7.45013e-05	0.144444
	0	0.516667	0.929462	0.0705147	2.31827e-05	0.133333
	0	0.533333	0.948209	0.0517674	2.33498e-05	0.122222
	0	0.55	0.998201	0.00177481	2.37954e-05	0.1
	0	0.566667	0.998201	0.00177481	2.37954e-05	0.1
	0	0.583333	0.998201	0.00177481	2.37954e-05	0.1
	0	0.6	0.998201	0.00177481	2.37954e-05	0.1
	0	0.616667	0.997977	0.00199666	2.66236e-05	0.0888889
	0	0.633333	0.997303	0.00266222	3.51082e-05	0.0666667
	0	0.65	0.997303	0.00266222	3.51082e-05	0.0666667
	0	0.666667	0.997788	0.00218291	2.87505e-05	0.0555556
	0	0.683333	0.999731	0.00026568	3.31956e-06	0.0333333
	0	0.7	0.999731	0.00026568	3.31956e-06	0.0333333
	0	0.716667	0.999731	0.00026568	3.31956e-06	0.0333333
	0	0.733333	0.999731	0.00026568	3.31956e-06	0.0333333
	0	0.75	0.999731	0.00026568	3.31956e-06	0.0333333
	0	0.766667	0.99977	0.000204146	2.59164e-05	0.0666667
	0	0.783333	0.99977	0.000204146	2.59164e-05	0.0666667
	0	0.8	0.99977	0.000204146	2.59164e-05	0.0666667
	0	0.816667	0.99977	0.000204146	2.59164e-05	0.0666667
	0	0.833333	0.999809	0.000142612	4.85132e-05	0.0333333
	0	0.85	0.676916	0.323047	3.68394e-05	0.0555556
	0	0.866667	0.596192	0.403774	3.3921e-05	0.0666667
	0	0.883333	0.596192	0.403774	3.3921e-05	0.0666667
	0	0.9	0.596192	0.403774	3.3921e-05	0.0666667
	0	0.916667	0.596192	0.403774	3.3921e-05	0.0666667
	0	0.933333	0.653879	0.346092	2.91206e-05	0.0777778
	0	0.95	0.730795	0.269182	2.272e-05	0.1
	0	0.966667	0.730795	0.269182	2.272e-05	0.1
	0	0.983333	0.730795	0.269182	2.272e-05	0.1
	0	1	0.730795	0.269182	2.272e-05	0.1
	0	1.01667	0.671078	0.328901	2.15303e-05	0.111111
	0	1.03333	0.581502	0.418478	1.97458e-05	0.133333
	0	1.05	0.581502	0.418478	1.97458e-05	0.133333
	0	1.06667	0.581502	0.418478	1.97458e-05	0.133333
	0	1.08333	0.665197	0.334784	1.87489e-05	0.166667
	0	1.1	0.665197	0.334784	1.87489e-05	0.166667
	0	1.11667	0.683066	0.316749	0.000184316	0.177778
	0	1.13333	0.676955	0.322527	0.000517754	0.177778
	0	1.15	0.676954	0.322528	0.000518088	0.177778
	0	1.16667	0.712847	0.286692	0.000461153	0.2
	0	1.18333	0.741562	0.258023	0.000415405	0.222222
	0	1.2	0.753868	0.245736	0.000395799	0.233333
	0	1.21667	0.774777	0.224856	0.000367526	0.255556
	0	1.23333	0.753083	0.246518	0.000398963	0.233333
	0	1.25	0.753083	0.246518	0.000398963	0.233333
	0	1.26667	0.753083	0.246518	0.000398963	0.233333
	0	1.28333	0.753083	0.246518	0.000398963	0.233333
	0	1.3	0.812084	0.187477	0.000438925	0.211111
	0	1.31667	0.846501	0.153036	0.000462236	0.2
	0	1.33333	0.861851	0.137733	0.000416018	0.222222
	0	1.35	0.86843	0.131174	0.00039621	0.233333
	0	1.36667	0.894636	0.104904	0.000460004	0.2
	0	1.38333	0.989081	0.0103689	0.000549577	0.166667
	0	1.4	0.986355	0.0129596	0.000685554	0.133333
	0	1.41667	0.986355	0.0129596	0.000685554	0.133333
	0	1.43333	0.988304	0.0111083	0.000587744	0.155556
	0	1.45	0.989084	0.0103677	0.00054862	0.166667
	0	1.46667	0.987405	0.0119623	0.000632458	0.144444
	0	1.48333	0.981808	0.0172787	0.000913123	0.1
	0	1.5	0.981808	0.0172787	0.000913123	0.1
	0	1.51667	0.981808	0.0172787	0.000913123	0.1
	0	1.53333	0.981808	0.0172787	0.000913123	0.1
	0	1.55	0.981808	0.0172787	0.000913123	0.1
	0	1.56667	0.980245	0.018737	0.00101843	0.0888889
	0	1.58333	0.975554	0.023112	0.00133435	0.0666667
	0	1.6	0.975554	0.023112	0.00133435	0.0666667
	0	1.61667	0.975554	0.023112	0.00133435	0.0666667
	0	1.63333	0.975554	0.023112	0.00133435	0.0666667
	0	1.65	0.970665	0.0277343	0.00160105	0.0555556
	0	1.66667	0.951108	0.0462239	0.00266782	0.0333333
	0	1.68333	0.951108	0.0462239	0.00266782	0.0333333
	0	1.7	0.951108	0.0462239	0.00266782	0.0333333
	0	1.71667	0.951108	0.0462239	0.00266782	0.0333333
	0	1.73333	0.951108	0.0462239	0.00266782	0.0333333
	0	1.75	0.947279	0.0513842	0.00133728	0.0666667
	0	1.76667	0.947279	0.0513842	0.00133728	0.0666667
	0	1.78333	0.947279	0.0513842	0.00133728	0.0666667
	0	1.8	0.947279	0.0513842	0.00133728	0.0666667
	0	1.81667	0.947279	0.0513842	0.00133728	0.0666667
	0	1.83333	0.947279	0.0513842	0.00133728	0.0666667
	0	1.85	0.947279	0.0513842	0.00133728	0.0666667
	0	1.86667	0.968336	0.0308602	0.000803278	0.111111
	0	1.88333	0.973601	0.0257292	0.000669778	0.133333
	0	1.9	0.973601	0.0257292	0.000669778	0.133333
	0	1.91667	0.973601	0.0257292	0.000669778	0.133333
	0	1.93333	0.973601	0.0257292	0.000669778	0.133333
	0	1.95	0.973601	0.0257292	0.000669778	0.133333
	0	1.96667	0.973601	0.0257292	0.000669778	0.133333
	0	1.98333	0.887326	0.112101	0.000573171	0.166667
	0	2	0.887326	0.112101	0.000573171	0.166667
	0	2.01667	0.887326	0.112101	0.000573171	0.166667
	0	2.03333	0.869992	0.129347	0.000661314	0.144444
	0	2.05	0.887315	0.112111	0.000574498	0.166667
	0	2.06667	0.878679	0.120659	0.000661846	0.144444
	0	2.08333	0.873281	0.126002	0.000716439	0.133333
	0	2.1	0.847968	0.151173	0.000858862	0.111111
	0	2.11667	0.831093	0.167953	0.000953812	0.1
	0	2.13333	0.831093	0.167953	0.000953812	0.1
	0	2.15	0.831093	0.167953	0.000953812	0.1
	0	2.16667	0.831093	0.167953	0.000953812	0.1
	0	2.18333	0.796803	0.202733	0.000464095	0.0777778
	0	2.2	0.771085	0.228818	9.68076e-05	0.0666667
	0	2.21667	0.771085	0.228818	9.68076e-05	0.0666667
	0	2.23333	0.771085	0.228818	9.68076e-05	0.0666667
	0	2.25	0.771085	0.228818	9.68076e-05	0.0666667
	0	2.26667	0.771085	0.228818	9.68076e-05	0.0666667
	0	2.28333	0.771085	0.228818	9.68076e-05	0.0666667
	0	2.3	0.84739	0.152545	6.46569e-05	0.1
	0	2.31667	0.84739	0.152545	6.46569e-05	0.1
	0	2.33333	0.803803	0.196116	8.11662e-05	0.0777778
	0	2.35	0.771113	0.228793	9.35481e-05	0.0666667
	0	2.36667	0.771113	0.228793	9.35481e-05	0.0666667
	0	2.38333	0.771113	0.228793	9.35481e-05	0.0666667
	0	2.4	0.771113	0.228793	9.35481e-05	0.0666667
	0	2.41667	0.862667	0.137276	5.654e-05	0.111111
	0	2.43333	0.885556	0.114397	4.73022e-05	0.133333
	0	2.45	0.894359	0.105597	4.37202e-05	0.144444
	0	2.46667	0.911668	0.0882964	3.58616e-05	0.177778
	0	2.48333	0.900447	0.099514	3.87078e-05	0.166667
	0	2.5	0.900447	0.099514	3.87078e-05	0.166667
	0	2.51667	0.924507	0.0754612	3.19846e-05	0.222222
	0	2.53333	0.936743	0.0632291	2.79137e-05	0.266667
	0	2.55	0.936743	0.0632291	2.79137e-05	0.266667
	0	2.56667	0.936743	0.0632291	2.79137e-05	0.266667
	0	2.58333	0.953896	0.0460831	2.10081e-05	0.255556
	0	2.6	0.992758	0.00723696	5.42961e-06	0.222222
	0	2.61667	0.99148	0.00851406	6.198e-06	0.188889
	0	2.63333	0.990344	0.00964927	6.89118e-06	0.166667
	0	2.65	0.990001	0.00981518	0.000183995	0.166667
	0	2.66667	0.987501	0.012269	0.000229809	0.133333
	0	2.68333	0.985002	0.0147227	0.000275682	0.111111
	0	2.7	0.983335	0.0163586	0.000306263	0.1
	0	2.71667	0.983335	0.0163586	0.000306263	0.1
	0	2.73333	0.988253	0.0115343	0.000212582	0.144444
	0	2.75	0.989459	0.0103561	0.000185065	0.166667
	0	2.76667	0.989459	0.0103561	0.000185065	0.166667
	0	2.78333	0.995112	0.00471108	0.000177012	0.177778
	0	2.8	0.997466	0.00232222	0.0002113	0.144444
	0	2.81667	0.995197	0.00461886	0.000183824	0.166667
	0	2.83333	0.995197	0.00461886	0.000183824	0.166667
	0	2.85	0.995197	0.00461886	0.000183824	0.166667
	0	2.86667	0.995497	0.00433019	0.00017242	0.177778
	0	2.88333	0.995683	0.00400717	0.000309415	0.233333
	0	2.9	0.994842	0.00475276	0.000404903	0.177778
	0	2.91667	0.994499	0.00506912	0.000431875	0.166667
	0	2.93333	0.994499	0.00506912	0.000431875	0.166667
	0	2.95	0.994499	0.00506912	0.000431875	0.166667
	0	2.96667	0.994499	0.00506912	0.000431875	0.166667
	0	2.98333	0.994499	0.00506912	0.000431875	0.166667
	0	3	0.994881	0.00471926	0.000399452	0.188889
	0	3.01667	0.995041	0.00457349	0.000385943	0.2
	0	3.03333	0.995041	0.00457349	0.000385943	0.2
	0	3.05	0.995041	0.00457349	0.000385943	0.2
	0	3.06667	0.995313	0.00438289	0.0003045	0.255556
	0	3.08333	0.996007	0.00373361	0.000259565	0.3
	0	3.1	0.996007	0.00373361	0.000259565	0.3
	0	3.11667	0.995853	0.00387721	0.000269496	0.288889
	0	3.13333	0.996163	0.00353307	0.000304303	0.255556
	0	3.15	0.997659	0.00200793	0.000332786	0.233333
	0	3.16667	0.997542	0.00210832	0.000349423	0.222222
	0	3.18333	0.997269	0.00234258	0.000388244	0.2
	0	3.2	0.997269	0.00234258	0.000388244	0.2
	0	3.21667	0.997269	0.00234258	0.000388244	0.2
	0	3.23333	0.967763	0.031887	0.000349801	0.222222
	0	3.25	0.955118	0.0445489	0.000333325	0.233333
	0	3.26667	0.955119	0.0445488	0.000331999	0.233333
	0	3.28333	0.955119	0.0445488	0.000331999	0.233333
	0	3.3	0.955119	0.0445488	0.000331999	0.233333
	0	3.31667	0.935691	0.0639588	0.000350263	0.222222
	0	3.33333	0.90602	0.0936422	0.000337417	0.233333
	0	3.35	0.90163	0.0980162	0.000353501	0.222222
	0	3.36667	0.891387	0.108222	0.00039103	0.2
	0	3.38333	0.913201	0.0864597	0.000339301	0.255556
	0	3.4	0.916224	0.0834362	0.000340211	0.266667
	0	3.41667	0.916224	0.0834362	0.000340211	0.266667
	0	3.43333	0.916224	0.0834362	0.000340211	0.266667
	0	3.45	0.916224	0.0834362	0.000340211	0.266667
	0	3.46667	0.916224	0.0834362	0.000340211	0.266667
	0	3.48333	0.946797	0.0528147	0.000388268	0.233333
	0	3.5	0.946797	0.0528147	0.000388268	0.233333
	0	3.51667	0.946797	0.0528147	0.000388268	0.233333
	0	3.53333	0.946797	0.0528147	0.000388268	0.233333
	0	3.55	0.938218	0.0614769	0.000305316	0.2
	0	3.56667	0.938218	0.0614769	0.000305316	0.2
	0	3.58333	0.938218	0.0614769	0.000305316	0.2
	0	3.6	0.938218	0.0614769	0.000305316	0.2
	0	3.61667	0.930776	0.0688996	0.000323945	0.177778
	0	3.63333	0.926312	0.0733532	0.000335122	0.166667
	0	3.65	0.935135	0.0645664	0.000298486	0.188889
	0	3.66667	0.939211	0.0605063	0.00028233	0.2
	0	3.68333	0.939211	0.0605063	0.00028233	0.2
	0	3.7	0.939211	0.0605063	0.00028233	0.2
	0	3.71667	0.974575	0.0251127	0.000312298	0.177778
	0	3.73333	0.995793	0.00387658	0.000330279	0.166667
	0	3.75	0.995793	0.00387658	0.000330279	0.166667
	0	3.76667	0.995494	0.00415348	0.000353007	0.155556
	0	3.78333	0.994744	0.00484573	0.000409827	0.133333
	0	3.8	0.994744	0.00484573	0.000409827	0.133333
	0	3.81667	0.994744	0.00484573	0.000409827	0.133333
	0	3.83333	0.994744	0.00484573	0.000409827	0.133333
	0	3.85	0.994744	0.00484573	0.000409827	0.133333
	0	3.86667	0.994744	0.00484573	0.000409827	0.133333
	0	3.88333	0.994744	0.00484573	0.000409827	0.133333
	0	3.9	0.994744	0.00484573	0.000409827	0.133333
	0	3.91667	0.994744	0.00484573	0.000409827	0.133333
	0	3.93333	0.995924	0.0039677	0.000108098	0.122222
	0	3.95	0.996248	0.0036522	9.94001e-05	0.133333
	0	3.96667	0.996248	0.0036522	9.94001e-05	0.133333
	0	3.98333	0.996248	0.0036522	9.94001e-05	0.133333
	0	4	0.996537	0.00337127	9.17558e-05	0.144444
	0	4.01667	0.997352	0.00257803	7.02442e-05	0.188889
	0	4.03333	0.997741	0.00219608	6.32898e-05	0.222222
	0	4.05	0.997577	0.00235439	6.8861e-05	0.2
	0	4.06667	0.997263	0.00263194	0.000105062	0.222222
	0	4.08333	0.997129	0.00275089	0.000120577	0.233333
	0	4.1	0.997247	0.00263412	0.000119183	0.244444
	0	4.11667	0.997453	0.00242978	0.000116744	0.266667
	0	4.13333	0.996946	0.00291571	0.000138271	0.222222
	0	4.15	0.99878	0.00110824	0.000112131	0.166667
	0	4.16667	0.99878	0.00110824	0.000112131	0.166667
	0	4.18333	0.998856	0.00103898	0.000105209	0.177778
	0	4.2	0.998816	0.00107189	0.000111663	0.166667
	0	4.21667	0.998816	0.00107189	0.000111663	0.166667
	0	4.23333	0.998956	0.000945787	9.85337e-05	0.188889
	0	4.25	0.999014	0.000893243	9.30631e-05	0.2
	0	4.26667	0.999014	0.000893243	9.30631e-05	0.2
	0	4.28333	0.998817	0.00107189	0.000111548	0.166667
	0	4.3	0.998817	0.00107189	0.000111548	0.166667
	0	4.31667	0.998817	0.00107189	0.000111548	0.166667
	0	4.33333	0.998732	0.00114846	0.000119511	0.155556
	0	4.35	0.998521	0.00133986	0.000139419	0.133333
	0	4.36667	0.998634	0.0012368	0.000128709	0.144444
	0	4.38333	0.998521	0.00133985	0.000139118	0.133333
	0	4.4	0.998521	0.00133985	0.000139118	0.133333
	0	4.41667	0.998521	0.00133985	0.000139118	0.133333
	0	4.43333	0.998521	0.00133985	0.000139118	0.133333
	0	4.45	0.976703	0.0231662	0.000130809	0.144444
	0	4.46667	0.941794	0.0580884	0.000117515	0.166667
	0	4.48333	0.95147	0.0484282	0.000102189	0.2
	0	4.5	0.95147	0.0484282	0.000102189	0.2
	0	4.51667	0.945403	0.0544818	0.00011494	0.177778
	0	4.53333	0.932817	0.0670472	0.000135988	0.144444
	0	4.55	0.927225	0.0726305	0.000144362	0.133333
	0	4.56667	0.920634	0.0792167	0.000149311	0.122222
	0	4.58333	0.927293	0.072585	0.000121943	0.133333
	0	4.6	0.921189	0.0787173	9.38584e-05	0.122222
	0	4.61667	0.904911	0.09507	1.89669e-05	0.1
	0	4.63333	0.928683	0.0713025	1.42349e-05	0.133333
	0	4.65	0.928683	0.0713025	1.42349e-05	0.133333
	0	4.66667	0.971443	0.0285465	1.08616e-05	0.111111
	0	4.68333	0.999949	4.24187e-05	8.6127e-06	0.1
	0	4.7	0.999949	4.24187e-05	8.6127e-06	0.1
	0	4.71667	0.999949	4.24187e-05	8.6127e-06	0.1
	0	4.73333	0.999949	4.24187e-05	8.6127e-06	0.1
	0	4.75	0.999943	4.77209e-05	9.65917e-06	0.0888889
	0	4.76667	0.999934	5.16335e-05	1.43845e-05	0.0888889
	0	4.78333	0.99992	6.12456e-05	1.9163e-05	0.0777778
	0	4.8	0.999906	7.14532e-05	2.23503e-05	0.0666667
	0	4.81667	0.999906	7.14532e-05	2.23503e-05	0.0666667
	0	4.83333	0.999906	7.14532e-05	2.23503e-05	0.0666667
	0	4.85	0.999906	7.14532e-05	2.23503e-05	0.0666667
	0	4.86667	0.999937	4.76445e-05	1.58464e-05	0.1
	0	4.88333	0.999937	4.76445e-05	1.58464e-05	0.1
	0	4.9	0.999937	4.76445e-05	1.58464e-05	0.1
	0	4.91667	0.999981	7.8391e-06	1.09904e-05	0.0666667
	0	4.93333	0.999984	6.71923e-06	9.49052e-06	0.0777778
	0	4.95	0.99999	3.92241e-06	5.87988e-06	0.133333
	0	4.96667	0.99999	3.92241e-06	5.87988e-06	0.133333
	0	4.98333	0.99999	3.92241e-06	5.87988e-06	0.133333
	0	5	0.99999	3.92241e-06	5.87988e-06	0.133333
	0	5.01667	0.99999	3.92241e-06	5.87988e-06	0.133333
	0	5.03333	0.99999	3.92241e-06	5.87988e-06	0.133333
	0	5.05	0.99999	3.92241e-06	5.87988e-06	0.133333
	0	5.06667	0.99999	3.92241e-06	5.87988e-06	0.133333
	0	5.08333	0.99999	3.92241e-06	5.87988e-06	0.133333
	0	5.1	0.99999	3.92241e-06	5.87988e-06	0.133333
	0	5.11667	0.99999	3.92241e-06	5.87988e-06	0.133333
	0	5.13333	0.999988	4.70699e-06	6.94031e-06	0.111111
	0	5.15	0.999985	6.70973e-06	8.4896e-06	0.0777778
	0	5.16667	0.991296	0.00861904	8.49569e-05	0.0777778
	0	5.18333	0.989851	0.0100529	9.5926e-05	0.0666667
	0	5.2	0.989851	0.0100529	9.5926e-05	0.0666667
	0	5.21667	0.989851	0.0100529	9.5926e-05	0.0666667
	0	5.23333	0.989851	0.0100529	9.5926e-05	0.0666667
	0	5.25	0.993234	0.00670196	6.39771e-05	0.1
	0	5.26667	0.993234	0.00670196	6.39771e-05	0.1
	0	5.28333	0.991301	0.00861681	8.21655e-05	0.0777778
	0	5.3	0.989851	0.0100529	9.58069e-05	0.0666667
	0	5.31667	0.994924	0.0050265	4.90096e-05	0.133333
	0	5.33333	0.994924	0.0050265	4.90096e-05	0.133333
	0	5.35	0.994924	0.0050265	4.90096e-05	0.133333
	0	5.36667	0.994924	0.0050265	4.90096e-05	0.133333
	0	5.38333	0.993909	0.0060318	5.87957e-05	0.111111
	0	5.4	0.993233	0.006702	6.53197e-05	0.1
	0	5.41667	0.994924	0.00502657	4.97235e-05	0.133333
	0	5.43333	0.994924	0.00502657	4.97235e-05	0.133333
	0	5.45	0.994462	0.00548353	5.42372e-05	0.122222
	0	5.46667	0.993232	0.0067021	6.62738e-05	0.1
	0	5.48333	0.993232	0.0067021	6.62738e-05	0.1
	0	5.5	0.993232	0.0067021	6.62738e-05	0.1
	0	5.51667	0.993232	0.0067021	6.62738e-05	0.1
	0	5.53333	0.993232	0.0067021	6.62738e-05	0.1
	0	5.55	0.993908	0.00603189	5.96951e-05	0.111111
	0	5.56667	0.994924	0.00502657	4.98272e-05	0.133333
	0	5.58333	0.994463	0.00548352	5.39612e-05	0.122222
	0	5.6	0.993907	0.00603189	6.15948e-05	0.111111
	0	5.61667	0.99564	0.00431003	4.98011e-05	0.155556
	0	5.63333	0.995929	0.00402339	4.7118e-05	0.166667
	0	5.65	0.974063	0.0258995	3.72758e-05	0.211111
	0	5.66667	0.935416	0.0645505	3.37477e-05	0.233333
	0	5.68333	0.935416	0.0645505	3.37477e-05	0.233333
	0	5.7	0.935416	0.0645505	3.37477e-05	0.233333
	0	5.71667	0.935416	0.0645505	3.37477e-05	0.233333
	0	5.73333	0.935416	0.0645505	3.37477e-05	0.233333
	0	5.75	0.88224	0.117749	1.12335e-05	0.122222
	0	5.76667	0.690767	0.30922	1.31025e-05	0.133333
	0	5.78333	0.690767	0.30922	1.31025e-05	0.133333
	0	5.8	0.657913	0.342074	1.36438e-05	0.144444
	0	5.81667	0.605346	0.39464	1.45099e-05	0.166667
	0	5.83333	0.669221	0.330752	2.66662e-05	0.155556
	0	5.85	0.691063	0.308906	3.01009e-05	0.166667
	0	5.86667	0.691063	0.308906	3.01009e-05	0.166667
	0	5.88333	0.691063	0.308906	3.01009e-05	0.166667
	0	5.9	0.691063	0.308906	3.01009e-05	0.166667
	0	5.91667	0.691063	0.308906	3.01009e-05	0.166667
	0	5.93333	0.741069	0.258906	2.54832e-05	0.2
	0	5.95	0.741069	0.258906	2.54832e-05	0.2
	0	5.96667	0.741069	0.258906	2.54832e-05	0.2
	0	5.98333	0.689286	0.310685	2.86689e-05	0.166667
	0	6	0.689286	0.310685	2.86689e-05	0.166667
	0	6.01667	0.689286	0.310685	2.86689e-05	0.166667
	0	6.03333	0.689286	0.310685	2.86689e-05	0.166667
	0	6.05	0.741062	0.258914	2.39905e-05	0.2
	0	6.06667	0.82032	0.179656	2.43889e-05	0.188889
	0	6.08333	0.874591	0.125386	2.30451e-05	0.2
	0	6.1	0.874591	0.125386	2.30451e-05	0.2
	0	6.11667	0.881128	0.118849	2.31679e-05	0.211111
	0	6.13333	0.89244	0.10754	2.02237e-05	0.233333
	0	6.15	0.88784	0.112134	2.60541e-05	0.255556
	0	6.16667	0.894604	0.105369	2.70834e-05	0.288889
	0	6.18333	0.898505	0.101469	2.64072e-05	0.3
	0	6.2	0.886931	0.113039	2.94087e-05	0.266667
	0	6.21667	0.943592	0.0563775	3.02514e-05	0.244444
	0	6.23333	0.97597	0.0239993	3.07329e-05	0.233333
	0	6.25	0.973858	0.0261083	3.33498e-05	0.211111
	0	6.26667	0.972627	0.0273386	3.48763e-05	0.2
	0	6.28333	0.969212	0.0307485	3.9161e-05	0.177778
	0	6.3	0.967164	0.0327945	4.17318e-05	0.166667
	0	6.31667	0.967164	0.0327945	4.17318e-05	0.166667
	0	6.33333	0.863506	0.136309	0.000185634	0.2
	0	6.35	0.836217	0.163559	0.000224098	0.233333
	0	6.36667	0.836217	0.163559	0.000224098	0.233333
	0	6.38333	0.836217	0.163559	0.000224098	0.233333
	0	6.4	0.836217	0.163559	0.000224098	0.233333
	0	6.41667	0.843665	0.156122	0.000213732	0.244444
	0	6.43333	0.836227	0.16355	0.000223445	0.233333
	0	6.45	0.836227	0.16355	0.000223445	0.233333
	0	6.46667	0.836227	0.16355	0.000223445	0.233333
	0	6.48333	0.828353	0.17142	0.000227023	0.222222
	0	6.5	0.836676	0.163111	0.000212916	0.233333
	0	6.51667	0.836676	0.163111	0.000212916	0.233333
	0	6.53333	0.836676	0.163111	0.000212916	0.233333
	0	6.55	0.836676	0.163111	0.000212916	0.233333
	0	6.56667	0.855582	0.144231	0.000186726	0.266667
	0	6.58333	0.863351	0.136477	0.00017238	0.288889
	0	6.6	0.850178	0.149637	0.000184803	0.266667
	0	6.61667	0.827032	0.172739	0.000228126	0.2
	0	6.63333	0.805443	0.194301	0.000256064	0.177778
	0	6.65	0.79249	0.207238	0.000272827	0.166667
	0	6.66667	0.740612	0.259047	0.000340877	0.133333
	0	6.68333	0.740612	0.259047	0.000340877	0.133333
	0	6.7	0.668624	0.330922	0.000454427	0.1
	0	6.71667	0.668624	0.330922	0.000454427	0.1
	0	6.73333	0.668624	0.330922	0.000454427	0.1
	0	6.75	0.750803	0.248851	0.000346682	0.133333
	0	6.76667	0.750803	0.248851	0.000346682	0.133333
	0	6.78333	0.750803	0.248851	0.000346682	0.133333
	0	6.8	0.729246	0.270376	0.00037789	0.122222
	0	6.81667	0.731441	0.268181	0.000378002	0.122222
	0	6.83333	0.814412	0.185319	0.000268861	0.177778
	0	6.85	0.857153	0.142634	0.000213192	0.233333
	0	6.86667	0.857153	0.142634	0.000213192	0.233333
	0	6.88333	0.857153	0.142634	0.000213192	0.233333
	0	6.9	0.833346	0.166406	0.000247976	0.2
	0	6.91667	0.850012	0.149765	0.000223188	0.222222
	0	6.93333	0.857154	0.142634	0.000212565	0.233333
	0	6.95	0.857154	0.142634	0.000212565	0.233333
	0	6.96667	0.857154	0.142634	0.000212565	0.233333
	0	6.98333	0.857154	0.142634	0.000212565	0.233333
	0	7	0.857154	0.142634	0.000212565	0.233333
	0	7.01667	0.842117	0.157648	0.000234916	0.211111
	0	7.03333	0.833346	0.166406	0.000247953	0.2
	0	7.05	0.833346	0.166406	0.000247953	0.2
	0	7.06667	0.800015	0.199687	0.000297524	0.166667
	0	7.08333	0.833345	0.166406	0.00024948	0.2
	0	7.1	0.833345	0.166406	0.00024948	0.2
	0	7.11667	0.833345	0.166406	0.00024948	0.2
	0	7.13333	0.812513	0.187207	0.000280164	0.177778
	0	7.15	0.800014	0.199687	0.000298575	0.166667
	0	7.16667	0.78592	0.213762	0.000318227	0.155556
	0	7.18333	0.750683	0.248949	0.000367357	0.133333
	0	7.2	0.729397	0.270209	0.000394388	0.122222
	0	7.21667	0.672632	0.326902	0.000466471	0.1
	0	7.23333	0.672632	0.326902	0.000466471	0.1
	0	7.25	0.631717	0.367763	0.000520436	0.0888889
	0	7.26667	0.508971	0.490347	0.000682333	0.0666667
	0	7.28333	0.508971	0.490347	0.000682333	0.0666667
	0	7.3	0.579118	0.420298	0.000584884	0.0777778
	0	7.31667	0.732159	0.267466	0.000374886	0.122222
	0	7.33333	0.754476	0.24518	0.000344862	0.133333
	0	7.35	0.901781	0.0980767	0.000142754	0.111111
	0	7.36667	0.999984	8.04124e-06	8.0151e-06	0.1
	0	7.38333	0.999984	8.04124e-06	8.0151e-06	0.1
	0	7.4	0.999984	8.04124e-06	8.0151e-06	0.1
	0	7.41667	0.999984	8.04124e-06	8.0151e-06	0.1
	0	7.43333	0.999984	8.04124e-06	8.0151e-06	0.1
	0	7.45	0.999986	6.57926e-06	7.033e-06	0.122222
	0	7.46667	0.999986	6.57929e-06	7.25345e-06	0.122222
	0	7.48333	0.999979	1.20494e-05	8.6031e-06	0.0666667
	0	7.5	0.960746	0.0392467	7.63423e-06	0.0777778
	0	7.51667	0.908434	0.0915595	6.34241e-06	0.1
	0	7.53333	0.908434	0.0915595	6.34241e-06	0.1
	0	7.55	0.908434	0.0915595	6.34241e-06	0.1
	0	7.56667	0.908434	0.0915595	6.34241e-06	0.1
	0	7.58333	0.915655	0.084339	5.73856e-06	0.133333
	0	7.6	0.915655	0.084339	5.73856e-06	0.133333
	0	7.61667	0.915655	0.084339	5.73856e-06	0.133333
	0	7.63333	0.915655	0.084339	5.73856e-06	0.133333
	0	7.65	0.887553	0.112444	2.7872e-06	0.1
	0	7.66667	0.887553	0.112444	2.7872e-06	0.1
	0	7.68333	0.873498	0.126499	2.80891e-06	0.0888889
	0	7.7	0.831331	0.168666	2.87403e-06	0.0666667
	0	7.71667	0.872897	0.127097	5.89278e-06	0.0888889
	0	7.73333	0.886752	0.113241	6.89903e-06	0.1
	0	7.75	0.886752	0.113241	6.89903e-06	0.1
	0	7.76667	0.886752	0.113241	6.89903e-06	0.1
	0	7.78333	0.886752	0.113241	6.89903e-06	0.1
	0	7.8	0.906928	0.0930644	7.53378e-06	0.0888889
	0	7.81667	0.978304	0.0216896	6.37904e-06	0.1
	0	7.83333	0.978304	0.0216896	6.37904e-06	0.1
	0	7.85	0.978304	0.0216896	6.37904e-06	0.1
	0	7.86667	0.978304	0.0216896	6.37904e-06	0.1
	0	7.88333	0.990014	0.00997881	7.07961e-06	0.0777778
	0	7.9	0.998797	0.00119569	7.60505e-06	0.0666667
	0	7.91667	0.8662	0.133793	7.07125e-06	0.0777778
	0	7.93333	0.767054	0.232942	4.80619e-06	0.133333
	0	7.95	0.767054	0.232942	4.80619e-06	0.133333
	0	7.96667	0.767054	0.232942	4.80619e-06	0.133333
	0	7.98333	0.767054	0.232942	4.80619e-06	0.133333
	0	8	0.767054	0.232942	4.80619e-06	0.133333
	0	8.01667	0.720705	0.279291	4.31909e-06	0.111111
	0	8.03333	0.690207	0.309792	1.54635e-06	0.1
	0	8.05	0.690207	0.309792	1.54635e-06	0.1
	0	8.06667	0.767654	0.232344	1.63664e-06	0.133333
	0	8.08333	0.767654	0.232344	1.63664e-06	0.133333
	0	8.1	0.767654	0.232344	1.63664e-06	0.133333
	0	8.11667	0.690206	0.309792	2.13344e-06	0.1
	0	8.13333	0.767654	0.232344	1.73114e-06	0.133333
	0	8.15	0.767654	0.232344	1.73114e-06	0.133333
	0	8.16667	0.767654	0.232344	1.73114e-06	0.133333
	0	8.18333	0.767654	0.232344	1.73114e-06	0.133333
	0	8.2	0.767654	0.232344	1.73114e-06	0.133333
	0	8.21667	0.831021	0.168977	1.53684e-06	0.122222
	0	8.23333	0.999999	9.04842e-08	1.13137e-06	0.0777778
	0	8.25	0.99999	8.98511e-07	9.12996e-06	0.0888889
	0	8.26667	0.999987	1.19698e-06	1.1768e-05	0.1
	0	8.28333	0.999989	9.7935e-07	9.64578e-06	0.122222
	0	8.3	0.999989	1.07605e-06	1.02384e-05	0.111111
	0	8.31667	0.999988	1.19492e-06	1.11641e-05	0.1
	0	8.33333	0.999986	1.34429e-06	1.24941e-05	0.0888889
	0	8.35	0.999982	1.79238e-06	1.6484e-05	0.0666667
	0	8.36667	0.999982	1.79238e-06	1.6484e-05	0.0666667
	0	8.38333	0.999982	1.79238e-06	1.6484e-05	0.0666667
	0	8.4	0.999986	1.34429e-06	1.23761e-05	0.0888889
	0	8.41667	0.999984	1.53633e-06	1.41243e-05	0.0777778
	0	8.43333	0.999982	1.79238e-06	1.64624e-05	0.0666667
	0	8.45	0.999984	1.54042e-06	1.42749e-05	0.0777778
	0	8.46667	0.999987	1.20446e-06	1.13584e-05	0.1
	0	8.48333	0.999991	9.03348e-07	8.5721e-06	0.133333
	0	8.5	0.999991	9.03348e-07	8.5721e-06	0.133333
	0	8.51667	0.999992	7.74302e-07	7.36515e-06	0.155556
	0	8.53333	0.999957	3.67584e-05	6.08594e-06	0.188889
	0	8.55	0.999939	5.48188e-05	6.08948e-06	0.188889
	0	8.56667	0.999931	6.2128e-05	6.89441e-06	0.166667
	0	8.58333	0.999931	6.2128e-05	6.89441e-06	0.166667
	0	8.6	0.999931	6.2128e-05	6.89441e-06	0.166667
	0	8.61667	0.999931	6.2128e-05	6.89441e-06	0.166667
	0	8.63333	0.999948	4.46352e-05	7.37882e-06	0.155556
	0	8.65	0.895663	0.104262	7.52904e-05	0.122222
	0	8.66667	0.827849	0.172031	0.000119264	0.111111
	0	8.68333	0.856541	0.143359	9.94988e-05	0.133333
	0	8.7	0.856541	0.143359	9.94988e-05	0.133333
	0	8.71667	0.856541	0.143359	9.94988e-05	0.133333
	0	8.73333	0.856541	0.143359	9.94988e-05	0.133333
	0	8.75	0.827857	0.172031	0.000112824	0.111111
	0	8.76667	0.808734	0.191145	0.000121708	0.1
	0	8.78333	0.808734	0.191145	0.000121708	0.1
	0	8.8	0.808734	0.191145	0.000121708	0.1
	0	8.81667	0.784825	0.215038	0.000136837	0.0888889
	0	8.83333	0.713101	0.286717	0.000182226	0.0666667
	0	8.85	0.713101	0.286717	0.000182226	0.0666667
	0	8.86667	0.713101	0.286717	0.000182226	0.0666667
	0	8.88333	0.713101	0.286717	0.000182226	0.0666667
	0	8.9	0.713101	0.286717	0.000182226	0.0666667
	0	8.91667	0.808523	0.191346	0.000131087	0.1
	0	8.93333	0.82767	0.172212	0.000117983	0.111111
	0	8.95	0.856392	0.14351	9.83276e-05	0.133333
	0	8.96667	0.843394	0.156501	0.000104647	0.1375
	0	8.98333	0.856392	0.14351	9.83276e-05	0.133333
	0	9	0.856392	0.14351	9.83276e-05	0.133333
	0	9.01667	0.856392	0.14351	9.83276e-05	0.133333
	0	9.03333	0.856392	0.14351	9.83276e-05	0.133333
	0	9.05	0.843337	0.156556	0.000107262	0.134146
	0	9.06667	0.856392	0.14351	9.83276e-05	0.133333
	0	9.08333	0.82767	0.172212	0.000117983	0.111111
	0	9.1	0.808523	0.191346	0.000131087	0.1
	0	9.11667	0.808523	0.191346	0.000131087	0.1
	0	9.13333	0.825107	0.174753	0.000140297	0.0888889
	0	9.15	0.874858	0.124974	0.000167925	0.0666667
	0	9.16667	0.874858	0.124974	0.000167925	0.0666667
	0	9.18333	0.874858	0.124974	0.000167925	0.0666667
	0	9.2	0.874858	0.124974	0.000167925	0.0666667
	0	9.21667	0.874858	0.124974	0.000167925	0.0666667
	0	9.23333	0.874858	0.124974	0.000167925	0.0666667
	0	9.25	0.874858	0.124974	0.000167925	0.0666667
	0	9.26667	0.874858	0.124974	0.000167925	0.0666667
	0	9.28333	0.874858	0.124974	0.000167925	0.0666667
	0	9.3	0.874858	0.124974	0.000167925	0.0666667
	0	9.31667	0.89976	0.1001	0.000140102	0.0555556
	0	9.33333	0.999366	0.000604894	2.88094e-05	0.0333333
	0	9.35	0.999616	0.000362936	2.09618e-05	0.0555556
	0	9.36667	0.999679	0.000302447	1.89999e-05	0.0666667
	0	9.38333	0.755846	0.244146	7.45467e-06	0.0888889
	0	9.4	0.773276	0.22662	0.000104487	0.144444
	0	9.41667	0.802866	0.197	0.000133587	0.166667
	0	9.43333	0.802866	0.197	0.000133587	0.166667
	0	9.45	0.802866	0.197	0.000133587	0.166667
	0	9.46667	0.802866	0.197	0.000133587	0.166667
	0	9.48333	0.838224	0.161669	0.000106546	0.211111
	0	9.5	0.842698	0.157205	9.69256e-05	0.233333
	0	9.51667	0.928772	0.071122	0.000106312	0.211111
	0	9.53333	0.978981	0.0209071	0.000111787	0.2
	0	9.55	0.978981	0.0209071	0.000111787	0.2
	0	9.56667	0.978981	0.0209071	0.000111787	0.2
	0	9.58333	0.978981	0.0209071	0.000111787	0.2
	0	9.6	0.977737	0.022145	0.000118262	0.188889
	0	9.61667	0.97897	0.0209185	0.000111707	0.2
	0	9.63333	0.97897	0.0209185	0.000111707	0.2
	0	9.65	0.97897	0.0209185	0.000111707	0.2
	0	9.66667	0.97897	0.0209185	0.000111707	0.2
	0	9.68333	0.98352	0.0163544	0.000125308	0.205128
	0	9.7	0.97897	0.0209185	0.000111707	0.2
	0	9.71667	0.97897	0.0209185	0.000111707	0.2
	0	9.73333	0.97897	0.0209185	0.000111707	0.2
	0	9.75	0.97897	0.0209185	0.000111707	0.2
	0	9.76667	0.962615	0.0371863	0.000198335	0.111111
	0	9.78333	0.995199	0.00447386	0.000326959	0.0666667
	0	9.8	0.995199	0.00447386	0.000326959	0.0666667
	0	9.81667	0.990408	0.00894772	0.000644727	0.0333333
	0	9.83333	0.840787	0.158781	0.000431625	0.0555556
	0	9.85	0.803382	0.196239	0.00037835	0.0666667
	0	9.86667	0.803382	0.196239	0.00037835	0.0666667
	0	9.88333	0.803382	0.196239	0.00037835	0.0666667
	0	9.9	0.803382	0.196239	0.00037835	0.0666667
	0	9.91667	0.803382	0.196239	0.00037835	0.0666667
	0	9.93333	0.803382	0.196239	0.00037835	0.0666667
	0	9.95	0.803382	0.196239	0.00037835	0.0666667
	0	9.96667	0.803382	0.196239	0.00037835	0.0666667
	0	9.98333	0.803382	0.196239	0.00037835	0.0666667
	0	10	0.803382	0.196239	0.00037835	0.0666667
	0	10.0167	0.852535	0.14718	0.000284852	0.0888889
	0	10.0333	0.868919	0.130827	0.000253686	0.1
	0	10.05	0.868919	0.130827	0.000253686	0.1
	0	10.0667	0.868919	0.130827	0.000253686	0.1
	0	10.0833	0.868919	0.130827	0.000253686	0.1
	0	10.1	0.882027	0.117745	0.000228351	0.111111
	0	10.1167	0.901689	0.0981206	0.000190349	0.133333
	0	10.1333	0.909128	0.0906966	0.000175814	0.144444
	0	10.15	0.925965	0.0738921	0.000143033	0.177778
	0	10.1667	0.934191	0.0656819	0.000127157	0.2
	0	10.1833	0.934191	0.0656819	0.000127157	0.2
	0	10.2	0.934191	0.0656819	0.000127157	0.2
	0	10.2167	0.934191	0.0656819	0.000127157	0.2
	0	10.2333	0.934191	0.0656819	0.000127157	0.2
	0	10.25	0.934191	0.0656819	0.000127157	0.2
	0	10.2667	0.926066	0.0737913	0.000142691	0.177778
	0	10.2833	0.90925	0.0905749	0.000175374	0.144444
	0	10.3	0.921344	0.0785033	0.000153101	0.166667
	0	10.3167	0.90168	0.0981291	0.000191292	0.133333
	0	10.3333	0.835562	0.164387	5.15757e-05	0.0777778
	0	10.35	0.835562	0.164387	5.15754e-05	0.0777778
	0	10.3667	0.904077	0.0958922	3.03504e-05	0.133333
	0	10.3833	0.904077	0.0958922	3.03504e-05	0.133333
	0	10.4	0.930234	0.0697433	2.29302e-05	0.122222
	0	10.4167	0.999984	1.26952e-05	3.14302e-06	0.1
	0	10.4333	0.831434	0.168505	6.12655e-05	0.122222
	0	10.45	0.768227	0.23169	8.30615e-05	0.133333
	0	10.4667	0.768227	0.23169	8.30615e-05	0.133333
	0	10.4833	0.768227	0.23169	8.30615e-05	0.133333
	0	10.5	0.768227	0.23169	8.30615e-05	0.133333
	0	10.5167	0.690969	0.30892	0.000110701	0.1
	0	10.5333	0.690969	0.30892	0.000110701	0.1
	0	10.55	0.690969	0.30892	0.000110701	0.1
	0	10.5667	0.690969	0.30892	0.000110701	0.1
	0	10.5833	0.690969	0.30892	0.000110701	0.1
	0	10.6	0.690969	0.30892	0.000110701	0.1
	0	10.6167	0.652341	0.347535	0.000124418	0.0888889
	0	10.6333	0.443513	0.556264	0.000222663	0.0555556
	0	10.65	0.535851	0.463919	0.000229679	0.0666667
	0	10.6667	0.535851	0.463919	0.000229679	0.0666667
	0	10.6833	0.535851	0.463919	0.000229679	0.0666667
	0	10.7	0.535851	0.463919	0.000229679	0.0666667
	0	10.7167	0.535851	0.463919	0.000229679	0.0666667
	0	10.7333	0.535851	0.463919	0.000229679	0.0666667
	0	10.75	0.535851	0.463919	0.000229679	0.0666667
	0	10.7667	0.535851	0.463919	0.000229679	0.0666667
	0	10.7833	0.549943	0.449796	0.000260896	0.111111
	0	10.8	0.553466	0.446265	0.0002687	0.133333
	0	10.8167	0.553466	0.446265	0.0002687	0.133333
	0	10.8333	0.553466	0.446265	0.0002687	0.133333
	0	10.85	0.553466	0.446265	0.0002687	0.133333
	0	10.8667	0.553466	0.446265	0.0002687	0.133333
	0	10.8833	0.553466	0.446265	0.0002687	0.133333
	0	10.9	0.553466	0.446265	0.0002687	0.133333
	0	10.9167	0.553466	0.446265	0.0002687	0.133333
	0	10.9333	0.553466	0.446265	0.0002687	0.133333
	0	10.95	0.553466	0.446265	0.0002687	0.133333
	0	10.9667	0.553466	0.446265	0.0002687	0.133333
	0	10.9833	0.553466	0.446265	0.0002687	0.133333
	0	11	0.553466	0.446265	0.0002687	0.133333
	0	11.0167	0.642773	0.357012	0.000215	0.166667
	0	11.0333	0.642773	0.357012	0.000215	0.166667
	0	11.05	0.642773	0.357012	0.000215	0.166667
	0	11.0667	0.642773	0.357012	0.000215	0.166667
	0	11.0833	0.642773	0.357012	0.000215	0.166667
	0	11.1	0.642773	0.357012	0.000215	0.166667
	0	11.1167	0.683474	0.316319	0.000207298	0.155556
	0	11.1333	0.785227	0.214585	0.000188045	0.133333
	0	11.15	0.742273	0.257502	0.000225615	0.111111
	0	11.1667	0.713636	0.286113	0.000250661	0.1
	0	11.1833	0.67614	0.323549	0.000311317	0.0777778
	0	11.2	0.648017	0.351626	0.000356808	0.0666667
	0	11.2167	0.764994	0.234765	0.000241225	0.1
	0	11.2333	0.735775	0.263971	0.000254311	0.0888889
	0	11.25	0.648118	0.351589	0.000293567	0.0666667
	0	11.2667	0.648118	0.351589	0.000293567	0.0666667
	0	11.2833	0.648118	0.351589	0.000293567	0.0666667
	0	11.3	0.736088	0.263692	0.0002208	0.0888889
	0	11.3167	0.765411	0.234393	0.000196545	0.1
	0	11.3333	0.788869	0.210954	0.000177563	0.111111
	0	11.35	0.824056	0.175795	0.000149091	0.133333
	0	11.3667	0.83759	0.162273	0.000137929	0.144444
	0	11.3833	0.859244	0.140636	0.000120069	0.166667
	0	11.4	0.859244	0.140636	0.000120069	0.166667
	0	11.4167	0.859244	0.140636	0.000120069	0.166667
	0	11.4333	0.859244	0.140636	0.000120069	0.166667
	0	11.45	0.859244	0.140636	0.000120069	0.166667
	0	11.4667	0.859244	0.140636	0.000120069	0.166667
	0	11.4833	0.899383	0.100529	8.74253e-05	0.155556
	0	11.5	0.999804	0.000190547	5.43136e-06	0.122222
	0	11.5167	0.999994	1.26213e-06	4.40315e-06	0.1
	0	11.5333	0.999993	1.54557e-06	5.35432e-06	0.0666667
	0	11.55	0.999993	1.54557e-06	5.35432e-06	0.0666667
	0	11.5667	0.999993	1.54557e-06	5.35432e-06	0.0666667
	0	11.5833	0.999993	1.54557e-06	5.35432e-06	0.0666667
	0	11.6	0.999993	1.54557e-06	5.35432e-06	0.0666667
	0	11.6167	0.999993	1.54557e-06	5.35432e-06	0.0666667
	0	11.6333	0.999994	8.68943e-07	4.66647e-06	0.0444444
	0	11.65	0.999996	1.92317e-07	3.97862e-06	0.0111111
	0	11.6667	0.864475	0.135508	1.65426e-05	0.0111111
	0	11.6833	0.864475	0.135508	1.65426e-05	0.0333333
	0	11.7	0.864475	0.135508	1.65426e-05	0.0333333
	0	11.7167	0.864475	0.135508	1.65426e-05	0.0333333
	0	11.7333	0.932227	0.0677638	9.47147e-06	0.0666667
	0	11.75	0.932227	0.0677638	9.47147e-06	0.0666667
	0	11.7667	0.941909	0.0580833	8.16578e-06	0.0777778
	0	11.7833	0.96485	0.0351449	5.43762e-06	0.133333
	0	11.8	0.971374	0.0286212	4.62783e-06	0.166667
	0	11.8167	0.971374	0.0286212	4.62783e-06	0.166667
	0	11.8333	0.971374	0.0286212	4.62783e-06	0.166667
	0	11.85	0.971374	0.0286212	4.62783e-06	0.166667
	0	11.8667	0.971374	0.0286212	4.62783e-06	0.166667
	0	11.8833	0.971374	0.0286212	4.62783e-06	0.166667
	0	11.9	0.971374	0.0286212	4.62783e-06	0.166667
	0	11.9167	0.971374	0.0286212	4.62783e-06	0.166667
	0	11.9333	0.971374	0.0286212	4.62783e-06	0.166667
	0	11.95	0.966974	0.0330214	4.97053e-06	0.144444
	0	11.9667	0.960971	0.0390235	5.62864e-06	0.122222
	0	11.9833	0.928447	0.071543	1.00529e-05	0.0666667
	0	12	0.928447	0.071543	1.00529e-05	0.0666667
	0	12.0167	0.938667	0.0613226	1.01894e-05	0.0777778
	0	12.0333	0.939429	0.0605584	1.2989e-05	0.0777778
	0	12.05	0.949024	0.0509639	1.19402e-05	0.1
	0	12.0667	0.949024	0.0509639	1.19402e-05	0.1
	0	12.0833	0.991299	0.00869172	9.63899e-06	0.0666667
	0	12.1	0.991299	0.00869172	9.63899e-06	0.0666667
	0	12.1167	0.991299	0.00869172	9.63899e-06	0.0666667
	0	12.1333	0.993473	0.00651881	8.2464e-06	0.0888889
	0	12.15	0.992979	0.00688475	0.000136449	0.111111
	0	12.1667	0.99115	0.00852012	0.000329449	0.133333
	0	12.1833	0.99115	0.00852012	0.000329449	0.133333
	0	12.2	0.99115	0.00852012	0.000329449	0.133333
	0	12.2167	0.992859	0.00674748	0.000393684	0.111111
	0	12.2333	0.993998	0.00556573	0.000436508	0.1
	0	12.25	0.983136	0.0165027	0.000361605	0.122222
	0	12.2667	0.979062	0.0206041	0.000333517	0.133333
	0	12.2833	0.982053	0.0176608	0.000286108	0.155556
	0	12.3	0.983249	0.0164834	0.000267144	0.166667
	0	12.3167	0.979065	0.0206043	0.000331178	0.133333
	0	12.3333	0.979065	0.0206043	0.000331178	0.133333
	0	12.35	0.979065	0.0206043	0.000331178	0.133333
	0	12.3667	0.979065	0.0206043	0.000331178	0.133333
	0	12.3833	0.972087	0.0274723	0.000440214	0.1
	0	12.4	0.972087	0.0274723	0.000440214	0.1
	0	12.4167	0.972087	0.0274723	0.000440214	0.1
	0	12.4333	0.972087	0.0274723	0.000440214	0.1
	0	12.45	0.972087	0.0274723	0.000440214	0.1
	0	12.4667	0.972087	0.0274723	0.000440214	0.1
	0	12.4833	0.972087	0.0274723	0.000440214	0.1
	0	12.5	0.972087	0.0274723	0.000440214	0.1
	0	12.5167	0.972087	0.0274723	0.000440214	0.1
	0	12.5333	0.97906	0.0206085	0.000331841	0.133333
	0	12.55	0.97906	0.0206085	0.000331841	0.133333
	0	12.5667	0.983133	0.0165075	0.000359778	0.122222
	0	12.5833	0.994595	0.00501446	0.000390889	0.111111
	0	12.6	0.995087	0.00455837	0.000355043	0.122222
	0	12.6167	0.995496	0.0041785	0.000325486	0.133333
	0	12.6333	0.995496	0.0041785	0.000325486	0.133333
	0	12.65	0.995496	0.0041785	0.000325486	0.133333
	0	12.6667	0.995496	0.0041785	0.000325486	0.133333
	0	12.6833	0.995496	0.0041785	0.000325486	0.133333
	0	12.7	0.995496	0.0041785	0.000325486	0.133333
	0	12.7167	0.996366	0.0033731	0.000260635	0.166667
	0	12.7333	0.996366	0.0033731	0.000260635	0.166667
	0	12.75	0.996373	0.00338059	0.000246354	0.177778
	0	12.7667	0.995932	0.0038172	0.000250318	0.177778
	0	12.7833	0.994994	0.00469809	0.000307997	0.144444
	0	12.8	0.994577	0.0050896	0.000333634	0.133333
	0	12.8167	0.993497	0.0061041	0.000399016	0.111111
	0	12.8333	0.992777	0.00678044	0.000442605	0.1
	0	12.85	0.992777	0.00678044	0.000442605	0.1
	0	12.8667	0.897818	0.101783	0.000399803	0.111111
	0	12.8833	0.773842	0.22584	0.000318456	0.144444
	0	12.9	0.803383	0.196326	0.000291026	0.166667
	0	12.9167	0.83614	0.16361	0.000249821	0.2
	0	12.9333	0.83614	0.16361	0.000249821	0.2
	0	12.95	0.83614	0.16361	0.000249821	0.2
	0	12.9667	0.83614	0.16361	0.000249821	0.2
	0	12.9833	0.803399	0.196301	0.000299539	0.166667
	0	13	0.803399	0.196301	0.000299539	0.166667
	0	13.0167	0.803399	0.196301	0.000299539	0.166667
	0	13.0333	0.803399	0.196301	0.000299539	0.166667
	0	13.05	0.803399	0.196301	0.000299539	0.166667
	0	13.0667	0.836166	0.163585	0.000249651	0.2
	0	13.0833	0.826736	0.173002	0.000262446	0.188889
	0	13.1	0.836747	0.163008	0.000244652	0.2
	0	13.1167	0.836747	0.163008	0.000244652	0.2
	0	13.1333	0.836747	0.163008	0.000244652	0.2
	0	13.15	0.828203	0.171614	0.000182899	0.188889
	0	13.1667	0.807695	0.19227	3.46924e-05	0.166667
	0	13.1833	0.77811	0.22185	3.99973e-05	0.144444
	0	13.2	0.759619	0.240338	4.33128e-05	0.133333
	0	13.2167	0.759619	0.240338	4.33128e-05	0.133333
	0	13.2333	0.759619	0.240338	4.33128e-05	0.133333
	0	13.25	0.925312	0.07465	3.80271e-05	0.144444
	0	13.2667	0.999134	0.000832704	3.33666e-05	0.122222
	0	13.2833	0.999964	2.01289e-05	1.57297e-05	0.1
	0	13.3	0.999964	2.01289e-05	1.57297e-05	0.1
	0	13.3167	0.999964	2.01289e-05	1.57297e-05	0.1
	0	13.3333	0.999964	2.01289e-05	1.57297e-05	0.1
	0	13.35	0.999964	2.01289e-05	1.57297e-05	0.1
	0	13.3667	0.999966	1.93287e-05	1.46187e-05	0.111111
	0	13.3833	0.999984	1.28968e-05	2.73775e-06	0.0888889
	0	13.4	0.999993	4.55139e-06	2.25048e-06	0.0888889
	0	13.4167	0.999994	4.0457e-06	2.02118e-06	0.1
	0	13.4333	0.999994	4.0457e-06	2.02118e-06	0.1
	0	13.45	0.999994	4.0457e-06	2.02118e-06	0.1
	0	13.4667	0.999994	4.0457e-06	2.02118e-06	0.1
	0	13.4833	0.999993	5.19872e-06	2.23962e-06	0.0777778
	0	13.5	0.999992	6.06348e-06	2.40344e-06	0.0666667
	0	13.5167	0.999992	6.06348e-06	2.40344e-06	0.0666667
	0	13.5333	0.99999	6.06353e-06	3.74656e-06	0.0666667
	0	13.55	0.99999	6.06353e-06	3.74656e-06	0.0666667
	0	13.5667	0.99999	6.06353e-06	3.74656e-06	0.0666667
	0	13.5833	0.99999	6.06353e-06	3.74656e-06	0.0666667
	0	13.6	0.99999	6.06353e-06	3.74656e-06	0.0666667
	0	13.6167	0.99999	6.06353e-06	3.74656e-06	0.0666667
	0	13.6333	0.99999	5.89607e-06	4.22609e-06	0.0777778
	0	13.65	0.999993	2.44579e-06	4.98816e-06	0.0666667
	0	13.6667	0.999993	2.44579e-06	4.98816e-06	0.0666667
	0	13.6833	0.999993	2.44579e-06	4.98816e-06	0.0666667
	0	13.7	0.999993	2.44579e-06	4.98816e-06	0.0666667
	0	13.7167	0.999993	2.44579e-06	4.98816e-06	0.0666667
	0	13.7333	0.999993	2.44579e-06	4.98816e-06	0.0666667
	0	13.75	0.999993	2.44579e-06	4.98816e-06	0.0666667
	0	13.7667	0.999972	2.31178e-05	4.43608e-06	0.0888889
	0	13.7833	0.999928	6.39899e-05	8.38109e-06	0.111111
	0	13.8	0.999888	9.85393e-05	1.32247e-05	0.155556
	0	13.8167	0.999895	9.19702e-05	1.26847e-05	0.166667
	0	13.8333	0.999895	9.19702e-05	1.26847e-05	0.166667
	0	13.85	0.906855	0.0930612	8.40614e-05	0.166667
	0	13.8667	0.906855	0.0930612	8.40614e-05	0.166667
	0	13.8833	0.906855	0.0930609	8.36142e-05	0.166667
	0	13.9	0.906857	0.0930603	8.27198e-05	0.166667
	0	13.9167	0.906857	0.0930603	8.27198e-05	0.166667
	0	13.9333	0.906857	0.0930603	8.27198e-05	0.166667
	0	13.95	0.906857	0.0930603	8.27198e-05	0.166667
	0	13.9667	0.92238	0.0775502	6.95159e-05	0.2
	0	13.9833	0.92238	0.0775502	6.95159e-05	0.2
	0	14	0.930141	0.0697952	6.33133e-05	0.222222
	0	14.0167	0.922394	0.077536	7.03009e-05	0.2
	0	14.0333	0.922394	0.077536	7.03009e-05	0.2
	0	14.05	0.872523	0.12741	6.63447e-05	0.233333
	0	14.0667	0.878318	0.121619	6.33652e-05	0.244444
	0	14.0833	0.888458	0.111484	5.81511e-05	0.266667
	0	14.1	0.872523	0.12741	6.6402e-05	0.233333
	0	14.1167	0.888457	0.111484	5.85768e-05	0.266667
	0	14.1333	0.888457	0.111484	5.85768e-05	0.266667
	0	14.15	0.888457	0.111484	5.85768e-05	0.266667
	0	14.1667	0.888457	0.111484	5.85768e-05	0.266667
	0	14.1833	0.888457	0.111484	5.85768e-05	0.266667
	0	14.2	0.888457	0.111484	5.85768e-05	0.266667
	0	14.2167	0.883608	0.116331	6.09716e-05	0.255556
	0	14.2333	0.851278	0.148646	7.66654e-05	0.2
	0	14.25	0.821534	0.178375	9.18394e-05	0.166667
	0	14.2667	0.821534	0.178375	9.18394e-05	0.166667
	0	14.2833	0.821534	0.178375	9.18394e-05	0.166667
	0	14.3	0.83248	0.167434	8.62812e-05	0.177778
	0	14.3167	0.850723	0.1492	7.70176e-05	0.2
	0	14.3333	0.851883	0.14805	6.74387e-05	0.166667
	0	14.35	0.882606	0.117368	2.55252e-05	0.122222
	0	14.3667	0.882584	0.117391	2.54673e-05	0.122222
	0	14.3833	0.856616	0.143368	1.63329e-05	0.1
	0	14.4	0.856616	0.143368	1.63329e-05	0.1
	0	14.4167	0.892462	0.107526	1.23106e-05	0.133333
	0	14.4333	0.913861	0.0861293	9.86807e-06	0.166667
	0	14.45	0.913861	0.0861293	9.86807e-06	0.166667
	0	14.4667	0.907946	0.092044	1.03652e-05	0.155556
	0	14.4833	0.922236	0.0777556	8.78977e-06	0.122222
	0	14.5	0.999777	0.000222194	1.27468e-06	0.1
	0	14.5167	0.999777	0.000222194	1.27468e-06	0.1
	0	14.5333	0.999777	0.000222194	1.27468e-06	0.1
	0	14.55	0.999777	0.000222194	1.27468e-06	0.1
	0	14.5667	0.999868	0.000130608	1.61093e-06	0.0777778
	0	14.5833	0.99998	1.77816e-05	2.1261e-06	0.0777778
	0	14.6	0.999998	1.0537e-07	1.90008e-06	0.0666667
	0	14.6167	0.999997	1.27557e-07	3.16632e-06	0.0666667
	0	14.6333	0.999997	1.22579e-07	2.77189e-06	0.0888889
	0	14.65	0.999997	1.20919e-07	2.64042e-06	0.1
	0	14.6667	0.999997	1.20919e-07	2.64042e-06	0.1
	0	14.6833	0.999997	1.20919e-07	2.64042e-06	0.1
	0	14.7	0.930116	0.0698743	9.4462e-06	0.144444
	0	14.7167	0.818306	0.181673	2.08099e-05	0.166667
	0	14.7333	0.818306	0.181673	2.08099e-05	0.166667
	0	14.75	0.818306	0.181673	2.08099e-05	0.166667
	0	14.7667	0.848479	0.1515	2.13207e-05	0.2
	0	14.7833	0.848479	0.1515	2.13207e-05	0.2
	0	14.8	0.848479	0.1515	2.13207e-05	0.2
	0	14.8167	0.848479	0.1515	2.13207e-05	0.2
	0	14.8333	0.839566	0.160411	2.23656e-05	0.188889
	0	14.85	0.829539	0.170437	2.44402e-05	0.177778
	0	14.8667	0.839565	0.160411	2.32956e-05	0.188889
	0	14.8833	0.856453	0.143526	2.06948e-05	0.211111
	0	14.9	0.829539	0.170437	2.4294e-05	0.177778
	0	14.9167	0.829539	0.170437	2.42073e-05	0.177778
	0	14.9333	0.848479	0.1515	2.15251e-05	0.2
	0	14.95	0.848479	0.1515	2.15251e-05	0.2
	0	14.9667	0.848479	0.1515	2.15251e-05	0.2
	0	14.9833	0.848479	0.1515	2.15251e-05	0.2
	0	15	0.848479	0.1515	2.15251e-05	0.2
	0	15.0167	0.839566	0.160411	2.27837e-05	0.188889
	0	15.0333	0.696958	0.302999	4.29689e-05	0.1
	0	15.05	0.696958	0.302999	4.29689e-05	0.1
	0	15.0667	0.696958	0.302999	4.29689e-05	0.1
	0	15.0833	0.696958	0.302999	4.29689e-05	0.1
	0	15.1	0.772718	0.227249	3.23101e-05	0.133333
	0	15.1167	0.834644	0.16533	2.66407e-05	0.122222
	0	15.1333	0.999796	0.000193513	1.04355e-05	0.111111
	0	15.15	0.999809	0.000182169	8.66422e-06	0.122222
	0	15.1667	0.999769	0.000222515	8.28779e-06	0.1
	0	15.1833	0.999769	0.000222515	8.28779e-06	0.1
	0	15.2	0.999769	0.000222515	8.28779e-06	0.1
	0	15.2167	0.999822	0.00017122	6.33943e-06	0.0888889
	0	15.2333	0.999982	1.73372e-05	4.94351e-07	0.0666667
	0	15.25	0.999982	1.73372e-05	4.94351e-07	0.0666667
	0	15.2667	0.999965	3.46744e-05	6.54712e-07	0.0333333
	0	15.2833	0.999965	3.46744e-05	6.54712e-07	0.0333333
	0	15.3	0.999965	3.46744e-05	6.54712e-07	0.0333333
	0	15.3167	0.999965	3.46744e-05	6.54712e-07	0.0333333
	0	15.3333	0.999965	3.46744e-05	6.54712e-07	0.0222222
	0	15.35				0
	0	15.3667				0
	0	15.3833				0
	0	15.4				0
	0	15.4167	1	1.74947e-08	4.67035e-07	0.0333333
	0	15.4333	1	1.74947e-08	4.67035e-07	0.0333333
	0	15.45	0.999995	7.64163e-07	3.94373e-06	0.0666667
	0	15.4667	0.999995	7.64163e-07	3.94373e-06	0.0666667
	0	15.4833	0.999983	9.2495e-07	1.5828e-05	0.0888889
	0	15.5	0.990914	0.00906537	2.04538e-05	0.111111
	0	15.5167	0.977317	0.022662	2.14503e-05	0.133333
	0	15.5333	0.982805	0.0171574	3.78753e-05	0.177778
	0	15.55	0.984634	0.0153226	4.33503e-05	0.2
	0	15.5667	0.984634	0.0153226	4.33503e-05	0.2
	0	15.5833	0.986161	0.0138002	3.92321e-05	0.222222
	0	15.6	0.986156	0.0138052	3.93172e-05	0.222222
	0	15.6167	0.984617	0.0153391	4.36338e-05	0.2
	0	15.6333	0.984617	0.0153391	4.36338e-05	0.2
	0	15.65	0.984617	0.0153391	4.36338e-05	0.2
	0	15.6667	0.984617	0.0153391	4.36338e-05	0.2
	0	15.6833	0.984617	0.0153391	4.36338e-05	0.2
	0	15.7	0.984617	0.0153391	4.36338e-05	0.2
	0	15.7167	0.981543	0.0184066	5.08765e-05	0.166667
	0	15.7333	0.981543	0.0184066	5.08765e-05	0.166667
	0	15.75	0.981543	0.0184066	5.08765e-05	0.166667
	0	15.7667	0.97693	0.0230075	6.20928e-05	0.133333
	0	15.7833	0.983076	0.0168586	6.53346e-05	0.122222
	0	15.8	0.999464	0.00046163	7.39795e-05	0.1
	0	15.8167	0.999464	0.00046163	7.39795e-05	0.1
	0	15.8333	0.999247	0.000643013	0.000109885	0.0666667
	0	15.85	0.999247	0.000643013	0.000109885	0.0666667
	0	15.8667	0.999247	0.000643013	0.000109885	0.0666667
	0	15.8833	0.999247	0.000643013	0.000109885	0.0666667
	0	15.9	0.88893	0.110961	0.000108977	0.1
	0	15.9167	0.88893	0.110961	0.000108977	0.1
	0	15.9333	0.88893	0.110961	0.000108977	0.1
	0	15.95	0.88893	0.110961	0.000108977	0.1
	0	15.9667	0.909125	0.0907861	8.9271e-05	0.122222
	0	15.9833	0.916698	0.0832206	8.18814e-05	0.133333
	0	16	0.888948	0.11096	9.20148e-05	0.1
	0	16.0167	0.888948	0.11096	9.20148e-05	0.1
	0	16.0333	0.888948	0.11096	9.20148e-05	0.1
	0	16.05	0.857634	0.142296	7.0222e-05	0.0777778
	0	16.0667	0.834148	0.165798	5.38774e-05	0.0666667
	0	16.0833	0.834148	0.165798	5.38774e-05	0.0666667
	0	16.1	0.834148	0.165798	5.38774e-05	0.0666667
	0	16.1167	0.834148	0.165798	5.38774e-05	0.0666667
	0	16.1333	0.834148	0.165798	5.38774e-05	0.0666667
	0	16.15	0.834148	0.165798	5.38774e-05	0.0666667
	0	16.1667	0.800978	0.198958	6.45338e-05	0.0555556
	0	16.1833	0.834061	0.165885	5.39497e-05	0.0666667
	0	16.2	0.909372	0.0905901	3.79358e-05	0.122222
	0	16.2167	0.916915	0.0830466	3.84956e-05	0.133333
	0	16.2333	0.916915	0.0830466	3.84956e-05	0.133333
	0	16.25	0.999788	0.000196652	1.56078e-05	0.1
	0	16.2667	0.999788	0.000196652	1.56078e-05	0.1
	0	16.2833	0.999788	0.000196652	1.56078e-05	0.1
	0	16.3	0.999788	0.000196652	1.56078e-05	0.1
	0	16.3167	0.999761	0.000221234	1.75524e-05	0.0888889
	0	16.3333	0.999682	0.000294978	2.33863e-05	0.0666667
	0	16.35	0.999682	0.000294978	2.33863e-05	0.0666667
	0	16.3667	0.999726	0.00025284	2.09338e-05	0.0777778
	0	16.3833	0.999839	0.000147544	1.37118e-05	0.133333
	0	16.4	0.999839	0.000147544	1.37118e-05	0.133333
	0	16.4167	0.999839	0.000147544	1.37118e-05	0.133333
	0	16.4333	0.999839	0.000147544	1.37118e-05	0.133333
	0	16.45	0.994974	0.00500351	2.2808e-05	0.155556
	0	16.4667	0.994223	0.00575037	2.62561e-05	0.133333
	0	16.4833	0.854099	0.145879	2.27947e-05	0.155556
	0	16.5	0.798049	0.20193	2.14102e-05	0.166667
	0	16.5167	0.821808	0.178173	1.88988e-05	0.188889
	0	16.5333	0.803803	0.196148	4.872e-05	0.244444
	0	16.55	0.820153	0.179803	4.47693e-05	0.266667
	0	16.5667	0.820153	0.179803	4.47693e-05	0.266667
	0	16.5833	0.803803	0.196148	4.86705e-05	0.244444
	0	16.6	0.79446	0.205489	5.08998e-05	0.233333
	0	16.6167	0.79446	0.205489	5.08998e-05	0.233333
	0	16.6333	0.819433	0.180521	4.65565e-05	0.266667
	0	16.65	0.819433	0.180521	4.65565e-05	0.266667
	0	16.6667	0.811582	0.18837	4.78994e-05	0.255556
	0	16.6833	0.783325	0.216622	5.29168e-05	0.222222
	0	16.7	0.923704	0.0762419	5.35683e-05	0.2
	0	16.7167	0.923704	0.0762419	5.35683e-05	0.2
	0	16.7333	0.923704	0.0762419	5.35683e-05	0.2
	0	16.75	0.923704	0.0762419	5.35683e-05	0.2
	0	16.7667	0.923704	0.0762419	5.35683e-05	0.2
	0	16.7833	0.917113	0.0827871	0.000100187	0.188889
	0	16.8	0.920724	0.0791609	0.000115257	0.2
	0	16.8167	0.920724	0.0791609	0.000115257	0.2
	0	16.8333	0.929777	0.0701172	0.000105325	0.222222
	0	16.85	0.924529	0.0753599	0.000111217	0.2
	0	16.8667	0.924529	0.0753599	0.000111217	0.2
	0	16.8833	0.915095	0.0847799	0.000125066	0.177778
	0	16.9	0.909435	0.0904318	0.000133375	0.166667
	0	16.9167	0.909435	0.0904318	0.000133375	0.166667
	0	16.9333	0.909435	0.0904318	0.000133375	0.166667
	0	16.95	0.896388	0.10346	0.000151409	0.144444
	0	16.9667	0.888234	0.111603	0.00016268	0.133333
	0	16.9833	0.850979	0.148804	0.00021641	0.1
	0	17	0.888234	0.111603	0.000162318	0.133333
	0	17.0167	0.888234	0.111603	0.000162318	0.133333
	0	17.0333	0.888234	0.111603	0.000162318	0.133333
	0	17.05	0.888234	0.111603	0.000162318	0.133333
	0	17.0667	0.927943	0.0718951	0.000161894	0.211111
	0	17.0833	0.934744	0.0650852	0.000170717	0.233333
	0	17.1	0.931481	0.0683395	0.000179251	0.222222
	0	17.1167	0.923868	0.0759327	0.000199163	0.2
	0	17.1333	0.994446	0.00536531	0.00018905	0.166667
	0	17.15	0.993615	0.00617112	0.000213817	0.144444
	0	17.1667	0.993096	0.00667475	0.000229297	0.133333
	0	17.1833	0.993096	0.00667475	0.000229297	0.133333
	0	17.2	0.993096	0.00667475	0.000229297	0.133333
	0	17.2167	0.993096	0.00667475	0.000229297	0.133333
	0	17.2333	0.993096	0.00667475	0.000229297	0.133333
	0	17.25	0.993096	0.00667475	0.000229297	0.133333
	0	17.2667	0.993626	0.00616135	0.000212316	0.144444
	0	17.2833	0.994475	0.00533991	0.000185147	0.166667
	0	17.3	0.995395	0.00445004	0.000155457	0.2
	0	17.3167	0.994825	0.00500145	0.000173645	0.177778
	0	17.3333	0.994267	0.00560695	0.000126482	0.155556
	0	17.35	0.994732	0.00518358	8.48584e-05	0.166667
	0	17.3667	0.994983	0.00490609	0.00011075	0.177778
	0	17.3833	0.994732	0.00518358	8.48584e-05	0.166667
	0	17.4	0.995403	0.00444359	0.000153902	0.2
	0	17.4167	0.995403	0.00444359	0.000153902	0.2
	0	17.4333	0.995644	0.00420972	0.000145947	0.211111
	0	17.45	0.996689	0.00319939	0.000111232	0.277778
	0	17.4667	0.996935	0.0029624	0.000103036	0.3
	0	17.4833	0.997237	0.00269602	6.71961e-05	0.288889
	0	17.5	0.997761	0.00218964	4.89442e-05	0.266667
	0	17.5167	0.999997	1.70901e-07	2.64114e-06	0.255556
	0	17.5333	0.999997	1.67963e-07	2.62271e-06	0.255556
	0	17.55	0.999997	1.77525e-07	2.81262e-06	0.233333
	0	17.5667	0.999848	8.9784e-05	6.23205e-05	0.277778
	0	17.5833	0.999867	7.91094e-05	5.39903e-05	0.211111
	0	17.6	0.999997	1.05276e-06	1.83439e-06	0.166667
	0	17.6167	0.999778	0.00013216	8.96892e-05	0.188889
	0	17.6333	0.999749	0.000149781	0.000101625	0.166667
	0	17.65	0.999749	0.000149781	0.000101625	0.166667
	0	17.6667	0.999731	0.00016048	0.00010887	0.155556
	0	17.6833	0.999623	0.00022467	0.000152178	0.111111
	0	17.7	0.999582	0.00024963	0.000168251	0.1
	0	17.7167	0.999582	0.00024963	0.000168251	0.1
	0	17.7333	0.999565	0.000283574	0.00015174	0.111111
	0	17.75	0.999574	0.000308761	0.000117332	0.144444
	0	17.7667	0.99963	0.000267595	0.000101905	0.166667
	0	17.7833	0.99963	0.000267595	0.000101905	0.166667
	0	17.8	0.999605	0.000286334	0.000108823	0.155556
	0	17.8167	0.999802	0.000196361	1.78074e-06	0.1
	0	17.8333	0.999881	0.000117817	1.35958e-06	0.166667
	0	17.85	0.999881	0.000117817	1.35958e-06	0.166667
	0	17.8667	0.999881	0.000117817	1.35958e-06	0.166667
	0	17.8833	0.999872	0.000126232	1.41604e-06	0.155556
	0	17.9	0.999851	0.000147271	1.55719e-06	0.133333
	0	17.9167	0.99994	5.89108e-05	1.24103e-06	0.111111
	0	17.9333	0.992319	0.00767939	1.49375e-06	0.111111
	0	17.95	0.980799	0.0191985	2.189e-06	0.133333
	0	17.9667	0.971199	0.0287977	3.05437e-06	0.0888889
	0	17.9833	0.9616	0.0383969	3.52747e-06	0.0666667
	0	18	0.9616	0.0383969	3.52747e-06	0.0666667
	0	18.0167	0.9616	0.0383969	3.52747e-06	0.0666667
	0	18.0333	0.9616	0.0383969	3.52747e-06	0.0666667
	0	18.05	0.974399	0.025598	2.56987e-06	0.1
	0	18.0667	0.974399	0.025598	2.56987e-06	0.1
	0	18.0833	0.974399	0.025598	2.56987e-06	0.1
	0	18.1	0.974399	0.025598	2.56987e-06	0.1
	0	18.1167	0.974399	0.025598	2.56987e-06	0.1
	0	18.1333	0.968743	0.0312421	1.47055e-05	0.122222
	0	18.15	0.965616	0.0343677	1.61359e-05	0.111111
	0	18.1667	0.965616	0.0343677	1.60358e-05	0.111111
	0	18.1833	0.976634	0.0233544	1.19737e-05	0.166667
	0	18.2	0.976634	0.0233544	1.19737e-05	0.166667
	0	18.2167	0.980527	0.0194621	1.06988e-05	0.2
	0	18.2333	0.978093	0.0218948	1.19543e-05	0.177778
	0	18.25	0.976633	0.0233545	1.27077e-05	0.166667
	0	18.2667	0.976633	0.0233545	1.27077e-05	0.166667
	0	18.2833	0.976633	0.0233545	1.27077e-05	0.166667
	0	18.3	0.976633	0.0233545	1.27077e-05	0.166667
	0	18.3167	0.926792	0.0731941	1.34144e-05	0.166667
	0	18.3333	0.827112	0.172873	1.4828e-05	0.166667
	0	18.35	0.827112	0.172873	1.4828e-05	0.166667
	0	18.3667	0.827112	0.172873	1.4828e-05	0.166667
	0	18.3833	0.827112	0.172873	1.4828e-05	0.166667
	0	18.4	0.784445	0.215538	1.6996e-05	0.133333
	0	18.4167	0.784445	0.215538	1.6996e-05	0.133333
	0	18.4333	0.76485	0.235132	1.83249e-05	0.122222
	0	18.45	0.676673	0.323303	2.40765e-05	0.0888889
	0	18.4667	0.712598	0.28738	2.19077e-05	0.1
	0	18.4833	0.712598	0.28738	2.19077e-05	0.1
	0	18.5	0.712598	0.28738	2.19077e-05	0.1
	0	18.5167	0.663224	0.336762	1.37982e-05	0.0777778
	0	18.5333	0.626194	0.373798	7.71609e-06	0.0666667
	0	18.55	0.626194	0.373798	7.71609e-06	0.0666667
	0	18.5667	0.718658	0.281336	6.52235e-06	0.0888889
	0	18.5833	0.811122	0.188873	5.32861e-06	0.133333
	0	18.6	0.811122	0.188873	5.32861e-06	0.133333
	0	18.6167	0.825651	0.174344	4.95895e-06	0.144444
	0	18.6333	0.848897	0.151098	4.36749e-06	0.166667
	0	18.65	0.873656	0.126332	1.24325e-05	0.2
	0	18.6667	0.873656	0.126332	1.24325e-05	0.2
	0	18.6833	0.9102	0.089787	1.25173e-05	0.188889
	0	18.7	0.997533	0.00245526	1.14085e-05	0.2
	0	18.7167	0.996473	0.00351751	9.71849e-06	0.244444
	0	18.7333	0.996435	0.00355632	9.14894e-06	0.244444
	0	18.75	0.996678	0.00331331	8.77869e-06	0.255556
	0	18.7667	0.996424	0.00355385	2.24917e-05	0.266667
	0	18.7833	0.996424	0.00355385	2.24917e-05	0.266667
	0	18.8	0.996424	0.00355385	2.24917e-05	0.266667
	0	18.8167	0.996268	0.00370837	2.34468e-05	0.255556
	0	18.8333	0.981535	0.0184292	3.57375e-05	0.266667
	0	18.85	0.980751	0.0192118	3.72821e-05	0.255556
	0	18.8667	0.974849	0.025099	5.21417e-05	0.177778
	0	18.8833	0.9739	0.0260442	5.54347e-05	0.166667
	0	18.9	0.972036	0.0279045	5.93676e-05	0.155556
	0	18.9167	0.967376	0.0325552	6.92e-05	0.133333
	0	18.9333	0.967376	0.0325552	6.92e-05	0.133333
	0	18.95	0.967376	0.0325552	6.92e-05	0.133333
	0	18.9667	0.9739	0.0260442	5.53711e-05	0.166667
	0	18.9833	0.97825	0.0217035	4.6272e-05	0.2
	0	19	0.97825	0.0217035	4.6272e-05	0.2
	0	19.0167	0.971279	0.0286662	5.48338e-05	0.144444
	0	19.0333	0.969098	0.0308468	5.50068e-05	0.133333
	0	19.05	0.969098	0.0308468	5.50068e-05	0.133333
	0	19.0667	0.969098	0.0308468	5.50068e-05	0.133333
	0	19.0833	0.969098	0.0308468	5.50068e-05	0.133333
	0	19.1	0.969059	0.0308777	6.33839e-05	0.133333
	0	19.1167	0.938346	0.0615833	7.07821e-05	0.155556
	0	19.1333	0.926092	0.0738408	6.70396e-05	0.166667
	0	19.15	0.915411	0.0845269	6.18582e-05	0.144444
	0	19.1667	0.908732	0.0912064	6.16164e-05	0.133333
	0	19.1833	0.908732	0.0912064	6.16164e-05	0.133333
	0	19.2	0.908732	0.0912064	6.16164e-05	0.133333
	0	19.2167	0.908732	0.0912064	6.16164e-05	0.133333
	0	19.2333	0.908732	0.0912064	6.16164e-05	0.133333
	0	19.25	0.908732	0.0912064	6.16164e-05	0.133333
	0	19.2667	0.908732	0.0912064	6.16164e-05	0.133333
	0	19.2833	0.918013	0.0819408	4.66587e-05	0.1
	0	19.3	0.926211	0.073747	4.2373e-05	0.111111
	0	19.3167	0.943238	0.056729	3.32313e-05	0.144444
	0	19.3333	0.959004	0.040971	2.44991e-05	0.2
	0	19.35	0.959004	0.040971	2.44991e-05	0.2
	0	19.3667	0.999898	7.59842e-05	2.64698e-05	0.166667
	0	19.3833	0.999898	7.59842e-05	2.64698e-05	0.166667
	0	19.4	0.999898	7.59842e-05	2.64698e-05	0.166667
	0	19.4167	0.999898	7.59842e-05	2.64698e-05	0.166667
	0	19.4333	0.999898	7.59842e-05	2.64698e-05	0.166667
	0	19.45	0.999898	7.59842e-05	2.64698e-05	0.166667
	0	19.4667	0.999915	6.33201e-05	2.21371e-05	0.2
	0	19.4833	0.999927	5.42744e-05	1.90226e-05	0.233333
	0	19.5	0.999968	2.27927e-05	8.75376e-06	0.188889
	0	19.5167	0.999998	7.55468e-07	1.56555e-06	0.166667
	0	19.5333	0.999998	7.55459e-07	1.51137e-06	0.111111
	0	19.55	1	3.98473e-13	4.04769e-07	0.0666667
	0	19.5667	1	3.98473e-13	4.04769e-07	0.0666667
	0	19.5833	0.999998	8.14e-09	1.57577e-06	0.0888889
	0	19.6	0.999998	1.08532e-08	1.96611e-06	0.1
	0	19.6167	0.999998	1.08532e-08	1.96611e-06	0.1
	0	19.6333	0.998639	0.00135586	5.03619e-06	0.144444
	0	19.65	0.998736	0.00125901	4.67462e-06	0.155556
	0	19.6667	0.998526	0.00146885	5.42062e-06	0.133333
	0	19.6833	0.998639	0.00135586	5.11922e-06	0.144444
	0	19.7	0.998639	0.00135586	5.25636e-06	0.144444
	0	19.7167	0.998526	0.00146885	5.64348e-06	0.133333
	0	19.7333	0.998526	0.00146885	5.64348e-06	0.133333
	0	19.75	0.99882	0.00117508	4.52104e-06	0.166667
	0	19.7667	0.99882	0.00117508	4.52104e-06	0.166667
	0	19.7833	0.99882	0.00117508	4.52104e-06	0.166667
	0	19.8	0.998736	0.00125901	4.91701e-06	0.155556
	0	19.8167	0.99594	0.00404735	1.27648e-05	0.2
	0	19.8333	0.99594	0.00404735	1.27648e-05	0.2
	0	19.85	0.99478	0.00520373	1.60417e-05	0.155556
	0	19.8667	0.993911	0.00607101	1.78672e-05	0.133333
	0	19.8833	0.993911	0.00607101	1.78672e-05	0.133333
	0	19.9	0.993845	0.00613623	1.85241e-05	0.1
	0	19.9167	0.990769	0.00920434	2.7035e-05	0.0666667
	0	19.9333	0.990769	0.00920434	2.7035e-05	0.0666667
	0	19.95	0.990769	0.00920434	2.7035e-05	0.0666667
	0	19.9667	0.992964	0.00700575	2.98967e-05	0.0888889
	0	19.9833	0.992908	0.007057	3.46268e-05	0.0888889
	0	20	0.990545	0.00940933	4.59555e-05	0.0666667
	0	20.0167	0.990545	0.00940933	4.59555e-05	0.0666667
	0	20.0333	0.993696	0.00627292	3.11028e-05	0.1
	0	20.05	0.993696	0.00627292	3.11028e-05	0.1
	0	20.0667	0.993696	0.00627292	3.11028e-05	0.1
	0	20.0833	0.993696	0.00627292	3.11028e-05	0.1
	0	20.1	0.993696	0.00627292	3.11028e-05	0.1
	0	20.1167	0.993696	0.00627292	3.11028e-05	0.1
	0	20.1333	0.993696	0.00627292	3.11028e-05	0.1
	0	20.15	0.993696	0.00627292	3.11028e-05	0.1
	0	20.1667	0.994326	0.00564563	2.80557e-05	0.111111
	0	20.1833	0.995272	0.00470469	2.3485e-05	0.133333
	0	20.2	0.985253	0.0146612	8.58962e-05	0.144444
	0	20.2167	0.969223	0.0305916	0.000185754	0.166667
	0	20.2333	0.969223	0.0305916	0.000185754	0.166667
	0	20.25	0.969223	0.0305916	0.000185754	0.166667
	0	20.2667	0.969223	0.0305916	0.000185754	0.166667
	0	20.2833	0.965908	0.0338819	0.000210114	0.144444
	0	20.3	0.963101	0.0366605	0.000238516	0.122222
	0	20.3167	0.955001	0.0447162	0.000282968	0.1
	0	20.3333	0.955001	0.0447162	0.000282968	0.1
	0	20.35	0.955001	0.0447162	0.000282968	0.1
	0	20.3667	0.955001	0.0447162	0.000282968	0.1
	0	20.3833	0.932502	0.0670743	0.000424136	0.0666667
	0	20.4	0.932502	0.0670743	0.000424136	0.0666667
	0	20.4167	0.932502	0.0670743	0.000424136	0.0666667
	0	20.4333	0.858135	0.141502	0.000363771	0.0777778
	0	20.45	0.819234	0.180554	0.000212673	0.133333
	0	20.4667	0.819234	0.180554	0.000212673	0.133333
	0	20.4833	0.819234	0.180554	0.000212673	0.133333
	0	20.5	0.819234	0.180554	0.000212673	0.133333
	0	20.5167	0.855387	0.144443	0.000170192	0.166667
	0	20.5333	0.855387	0.144443	0.000170192	0.166667
	0	20.55	0.855387	0.144443	0.000170192	0.166667
	0	20.5667	0.855387	0.144443	0.000170192	0.166667
	0	20.5833	0.864425	0.135415	0.000159649	0.177778
	0	20.6	0.971073	0.0287454	0.000181371	0.155556
	0	20.6167	0.966256	0.0335348	0.000209359	0.133333
	0	20.6333	0.966256	0.0335348	0.000209359	0.133333
	0	20.65	0.959507	0.0402417	0.000251063	0.111111
	0	20.6667	0.955008	0.044713	0.000278866	0.1
	0	20.6833	0.955008	0.044713	0.000278866	0.1
	0	20.7	0.955008	0.044713	0.000278866	0.1
	0	20.7167	0.932512	0.0670695	0.000418165	0.0666667
	0	20.7333	0.741387	0.258086	0.000526054	0.1
	0	20.75	0.741387	0.258086	0.000526054	0.1
	0	20.7667	0.741387	0.258086	0.000526054	0.1
	0	20.7833	0.741387	0.258086	0.000526054	0.1
	0	20.8	0.741387	0.258086	0.000526054	0.1
	0	20.8167	0.741387	0.258086	0.000526054	0.1
	0	20.8333	0.709061	0.290347	0.000591623	0.0888889
	0	20.85	0.612082	0.38713	0.000788332	0.0666667
	0	20.8667	0.612082	0.38713	0.000788332	0.0666667
	0	20.8833	0.740991	0.258409	0.000599612	0.1
	0	20.9	0.788084	0.211425	0.000490662	0.122222
	0	20.9167	0.805743	0.193807	0.000449806	0.133333
	0	20.9333	0.785983	0.213696	0.000321464	0.1
	0	20.95	0.785983	0.213696	0.000321464	0.1
	0	20.9667	0.785983	0.213696	0.000321464	0.1
	0	20.9833	0.785983	0.213696	0.000321464	0.1
	0	21	0.785983	0.213696	0.000321464	0.1
	0	21.0167	0.820231	0.179504	0.000264243	0.122222
	0	21.0333	0.833075	0.166683	0.000242786	0.133333
	0	21.05	0.833075	0.166683	0.000242786	0.133333
	0	21.0667	0.833075	0.166683	0.000242786	0.133333
	0	21.0833	0.833075	0.166683	0.000242786	0.133333
	0	21.1	0.777433	0.222243	0.000323585	0.1
	0	21.1167	0.777433	0.222243	0.000323585	0.1
	0	21.1333	0.777433	0.222243	0.000323585	0.1
	0	21.15	0.777433	0.222243	0.000323585	0.1
	0	21.1667	0.777433	0.222243	0.000323585	0.1
	0	21.1833	0.777433	0.222243	0.000323585	0.1
	0	21.2	0.896946	0.10285	0.000204085	0.0777778
	0	21.2167	0.991051	0.00887186	7.70537e-05	0.1
	0	21.2333	0.991051	0.00887186	7.70537e-05	0.1
	0	21.25	0.991051	0.00887186	7.70537e-05	0.1
	0	21.2667	0.991051	0.00887186	7.70537e-05	0.1
	0	21.2833	0.995823	0.00408033	9.71405e-05	0.0777778
	0	21.3	0.999401	0.000486685	0.000112206	0.0666667
	0	21.3167	0.999401	0.000486685	0.000112206	0.0666667
	0	21.3333	0.999401	0.000486685	0.000112206	0.0666667
	0	21.35	0.999401	0.000486685	0.000112206	0.0666667
	0	21.3667	0.999601	0.000324457	7.48607e-05	0.1
	0	21.3833	0.999601	0.000324457	7.48607e-05	0.1
	0	21.4	0.999601	0.000324457	7.48607e-05	0.1
	0	21.4167	0.999601	0.000324457	7.48607e-05	0.1
	0	21.4333	0.999658	0.000278106	6.41908e-05	0.0777778
	0	21.45	1	2.28234e-11	1.7106e-07	0.0333333
	0	21.4667	1	2.28234e-11	1.7106e-07	0.0333333
	0	21.4833	1	2.28234e-11	1.7106e-07	0.0333333
	0	21.5	1	2.28234e-11	1.7106e-07	0.0333333
	0	21.5167	1	2.28234e-11	1.7106e-07	0.0222222
	0	21.5333	0.999996	2.44825e-07	4.11253e-06	0.0222222
	0	21.55	0.999996	2.44825e-07	4.11253e-06	0.0333333
	0	21.5667	0.999996	2.44825e-07	4.11253e-06	0.0333333
	0	21.5833	0.999996	2.44825e-07	4.11253e-06	0.0333333
	0	21.6	0.999996	2.44825e-07	4.11253e-06	0.0333333
	0	21.6167	0.999996	2.44825e-07	4.11253e-06	0.0333333
	0	21.6333	0.999996	2.44825e-07	4.11253e-06	0.0333333
	0	21.65	0.999996	2.44825e-07	4.11253e-06	0.0333333
	0	21.6667	0.999996	2.44825e-07	4.11253e-06	0.0333333
	0	21.6833	0.999997	1.62045e-07	2.78707e-06	0.0555556
	0	21.7	0.999997	1.4135e-07	2.45571e-06	0.0666667
	0	21.7167	0.999997	1.4135e-07	2.45571e-06	0.0666667
	0	21.7333	0.999998	2.40851e-07	1.86246e-06	0.111111
	0	21.75	0.999998	2.65727e-07	1.71415e-06	0.133333
	0	21.7667	0.999998	2.65727e-07	1.71415e-06	0.133333
	0	21.7833	0.999998	2.65727e-07	1.71415e-06	0.133333
	0	21.8	0.999998	2.57205e-07	1.39519e-06	0.122222
	0	21.8167	0.999998	2.85046e-07	1.88573e-06	0.155556
	0	21.8333	0.999998	3.04238e-07	2.06538e-06	0.166667
	0	21.85	0.999997	3.70829e-07	2.382e-06	0.133333
	0	21.8667	0.999997	3.70829e-07	2.382e-06	0.133333
	0	21.8833	0.999997	3.70829e-07	2.382e-06	0.133333
	0	21.9	0.993278	0.00671311	9.15682e-06	0.155556
	0	21.9167	0.991663	0.00832247	1.40604e-05	0.188889
	0	21.9333	0.990533	0.009449	1.77342e-05	0.166667
	0	21.95	0.988167	0.0118112	2.19754e-05	0.133333
	0	21.9667	0.988167	0.0118112	2.19754e-05	0.133333
	0	21.9833	0.989077	0.0109026	2.03134e-05	0.144444
	0	22	0.990533	0.00944895	1.76541e-05	0.166667
	0	22.0167	0.990533	0.00944895	1.76541e-05	0.166667
	0	22.0333	0.990533	0.00944895	1.76541e-05	0.166667
	0	22.05	0.990533	0.00944895	1.76541e-05	0.166667
	0	22.0667	0.989857	0.0101239	1.87007e-05	0.155556
	0	22.0833	0.987092	0.0128848	2.28386e-05	0.122222
	0	22.1	0.984225	0.015748	2.68959e-05	0.1
	0	22.1167	0.984225	0.015748	2.68959e-05	0.1
	0	22.1333	0.984225	0.015748	2.68959e-05	0.1
	0	22.15	0.982253	0.0177165	3.02118e-05	0.0888889
	0	22.1667	0.976338	0.023622	4.01594e-05	0.0666667
	0	22.1833	0.976338	0.023622	4.01594e-05	0.0666667
	0	22.2	0.976338	0.023622	4.01594e-05	0.0666667
	0	22.2167	0.982253	0.0177165	3.01761e-05	0.0888889
	0	22.2333	0.993158	0.00682186	2.02891e-05	0.0777778
	0	22.25	0.999929	6.3626e-05	7.79799e-06	0.0444444
	0	22.2667	0.999756	0.000231455	1.26142e-05	0.0555556
	0	22.2833	0.999695	0.000289319	1.57112e-05	0.0666667
	0	22.3	0.999695	0.000289319	1.57112e-05	0.0666667
	0	22.3167	0.999669	0.000314059	1.67995e-05	0.0888889
	0	22.3333	0.999661	0.000322306	1.71623e-05	0.1
	0	22.35	0.999661	0.000322306	1.71623e-05	0.1
	0	22.3667	0.999661	0.000322306	1.71623e-05	0.1
	0	22.3833	0.999618	0.000362594	1.92793e-05	0.0888889
	0	22.4	0.999491	0.000483459	2.56303e-05	0.0666667
	0	22.4167	0.999491	0.000483459	2.56303e-05	0.0666667
	0	22.4333	0.999618	0.000362594	1.92646e-05	0.0888889
	0	22.45	0.999661	0.000322306	1.71426e-05	0.1
	0	22.4667	0.999661	0.000322306	1.71426e-05	0.1
	0	22.4833	0.999661	0.000322306	1.71426e-05	0.1
	0	22.5	0.999661	0.000322306	1.71426e-05	0.1
	0	22.5167	0.999661	0.000322306	1.71426e-05	0.1
	0	22.5333	0.999661	0.000322306	1.71426e-05	0.1
	0	22.55	0.999661	0.000322306	1.71426e-05	0.1
	0	22.5667	0.999661	0.000322306	1.71426e-05	0.1
	0	22.5833	0.999695	0.000289319	1.56817e-05	0.0666667
	0	22.6	0.999695	0.000289321	1.58129e-05	0.0444444
	0	22.6167	0.999999	7.25793e-09	6.92099e-07	0.0333333
	0	22.6333	0.999999	7.25793e-09	6.92099e-07	0.0333333
	0	22.65	0.999999	7.25793e-09	6.92099e-07	0.0333333
	0	22.6667	0.999999	7.25793e-09	6.92099e-07	0.0333333
	0	22.6833	0.999999	7.25793e-09	6.92099e-07	0.0333333
	0	22.7	0.999999	7.25793e-09	6.92099e-07	0.0333333
	0	22.7167	0.999999	7.25793e-09	6.92099e-07	0.0333333
	0	22.7333	0.999979	1.12277e-05	9.51289e-06	0.0555556
	0	22.75	0.999974	1.40328e-05	1.17181e-05	0.0666667
	0	22.7667	0.997671	0.00218635	0.000142304	0.0888889
	0	22.7833	0.996904	0.00291046	0.000185832	0.1
	0	22.8	0.996019	0.00374204	0.000239046	0.0777778
	0	22.8167	0.996903	0.00291053	0.00018657	0.1
	0	22.8333	0.996903	0.00291053	0.00018657	0.1
	0	22.85	0.996903	0.00291053	0.00018657	0.1
	0	22.8667	0.996903	0.00291053	0.00018657	0.1
	0	22.8833	0.997168	0.00266363	0.000168405	0.111111
	0	22.9	0.997566	0.00229328	0.000141158	0.133333
	0	22.9167	0.997566	0.00229328	0.000141158	0.133333
	0	22.9333	0.997566	0.00229328	0.000141158	0.133333
	0	22.95	0.997566	0.00229328	0.000141158	0.133333
	0	22.9667	0.900044	0.0998336	0.000122072	0.155556
	0	22.9833	0.861036	0.13885	0.000114437	0.166667
	0	23	0.861036	0.13885	0.000114437	0.166667
	0	23.0167	0.826296	0.173562	0.00014232	0.133333
	0	23.0333	0.826296	0.173562	0.00014232	0.133333
	0	23.05	0.826296	0.173562	0.00014232	0.133333
	0	23.0667	0.861036	0.13885	0.000114194	0.166667
	0	23.0833	0.786486	0.213414	0.000100503	0.188889
	0	23.1	0.755419	0.244485	9.66217e-05	0.2
	0	23.1167	0.755419	0.244485	9.66217e-05	0.2
	0	23.1333	0.768291	0.231617	9.15645e-05	0.211111
	0	23.15	0.799928	0.199993	7.87253e-05	0.244444
	0	23.1667	0.81662	0.183308	7.20541e-05	0.266667
	0	23.1833	0.808646	0.191278	7.51852e-05	0.255556
	0	23.2	0.805322	0.194601	7.7192e-05	0.255556
	0	23.2167	0.81184	0.188085	7.4939e-05	0.266667
	0	23.2333	0.81184	0.188085	7.4939e-05	0.266667
	0	23.25	0.882829	0.117086	8.45652e-05	0.233333
	0	23.2667	0.882829	0.117086	8.45652e-05	0.233333
	0	23.2833	0.896603	0.103255	0.000142143	0.266667
	0	23.3	0.892108	0.107744	0.000148214	0.255556
	0	23.3167	0.881833	0.118005	0.00016209	0.233333
	0	23.3333	0.854572	0.145259	0.00016873	0.188889
	0	23.35	0.977393	0.0223226	0.000284154	0.0666667
	0	23.3667	0.977393	0.0223226	0.000284154	0.0666667
	0	23.3833	0.977393	0.0223226	0.000284154	0.0666667
	0	23.4	0.977393	0.0223226	0.000284154	0.0666667
	0	23.4167	0.977393	0.0223226	0.000284154	0.0666667
	0	23.4333	0.983044	0.016742	0.000213565	0.0888889
	0	23.45	0.984928	0.0148819	0.000190035	0.1
	0	23.4667	0.987823	0.0119656	0.0002109	0.0888889
	0	23.4833	0.996509	0.00321701	0.000273493	0.0666667
	0	23.5	0.996509	0.00321701	0.000273493	0.0666667
	0	23.5167	0.996509	0.00321701	0.000273493	0.0666667
	0	23.5333	0.996509	0.00321701	0.000273493	0.0666667
	0	23.55	0.997176	0.00263673	0.000186842	0.1
	0	23.5667	0.99578	0.00408712	0.00013306	0.144444
	0	23.5833	0.992714	0.00716722	0.000118974	0.166667
	0	23.6	0.992714	0.00716722	0.000118974	0.166667
	0	23.6167	0.990893	0.00895891	0.000148269	0.133333
	0	23.6333	0.990893	0.00895891	0.000148269	0.133333
	0	23.65	0.990893	0.00895891	0.000148269	0.133333
	0	23.6667	0.990893	0.00895891	0.000148269	0.133333
	0	23.6833	0.990893	0.00895891	0.000148269	0.133333
	0	23.7	0.990893	0.00895891	0.000148269	0.133333
	0	23.7167	0.990893	0.00895891	0.000148269	0.133333
	0	23.7333	0.987857	0.0119452	0.000197586	0.1
	0	23.75	0.987857	0.0119452	0.000197586	0.1
	0	23.7667	0.990882	0.00896671	0.000151416	0.133333
	0	23.7833	0.990882	0.00896671	0.000151416	0.133333
	0	23.8	0.990882	0.00896671	0.000151416	0.133333
	0	23.8167	0.990882	0.00896671	0.000151416	0.133333
	0	23.8333	0.990882	0.00896671	0.000151416	0.133333
	0	23.85	0.992472	0.00738997	0.000137814	0.144444
	0	23.8667	0.995728	0.00412686	0.000144812	0.133333
	0	23.8833	0.995728	0.00412686	0.000144812	0.133333
	0	23.9	0.995728	0.00412686	0.000144812	0.133333
	0	23.9167	0.995728	0.00412686	0.000144812	0.133333
	0	23.9333	0.995321	0.00450939	0.000169745	0.111111
	0	23.95	0.995049	0.0047644	0.000186366	0.1
	0	23.9667	0.995049	0.0047644	0.000186366	0.1
	0	23.9833	0.995049	0.0047644	0.000186366	0.1
	0	24	0.995629	0.0042875	8.38452e-05	0.0777778
	0	24.0167	0.928304	0.0681529	0.00354355	0.0888889
	0	24.0333	0.905717	0.0895606	0.00472241	0.1
	0	24.05	0.905717	0.0895606	0.00472241	0.1
	0	24.0667	0.858598	0.134325	0.00707717	0.0666667
	0	24.0833	0.791811	0.197574	0.0106152	0.0444444
	0	24.1	0.725024	0.260822	0.0141533	0.0333333
	0	24.1167	0.725024	0.260822	0.0141533	0.0333333
	0	24.1333	0.725024	0.260822	0.0141533	0.0333333
	0	24.15	0.805816	0.185606	0.00857817	0.0555556
	0	24.1667	0.826014	0.166802	0.00718438	0.0666667
	0	24.1833	0.826014	0.166802	0.00718438	0.0666667
	0	24.2	0.826014	0.166802	0.00718438	0.0666667
	0	24.2167	0.826014	0.166802	0.00718438	0.0666667
	0	24.2333	0.826014	0.166802	0.00718438	0.0666667
	0	24.25	0.826014	0.166802	0.00718438	0.0666667
	0	24.2667	0.826014	0.166802	0.00718438	0.0666667
	0	24.2833	0.869501	0.12511	0.0053886	0.0888889
	0	24.3	0.883997	0.111213	0.00479	0.1
	0	24.3167	0.883997	0.111213	0.00479	0.1
	0	24.3333	0.883997	0.111213	0.00479	0.1
	0	24.35	0.912794	0.0836092	0.00359673	0.133333
	0	24.3667	0.912794	0.0836092	0.00359673	0.133333
	0	24.3833	0.912794	0.0836092	0.00359673	0.133333
	0	24.4	0.919458	0.0772199	0.00332186	0.144444
	0	24.4167	0.930121	0.066997	0.00288207	0.166667
	0	24.4333	0.91266	0.0837374	0.00360227	0.133333
	0	24.45	0.91266	0.0837374	0.00360227	0.133333
	0	24.4667	0.91266	0.0837374	0.00360227	0.133333
	0	24.4833	0.930128	0.0669899	0.0028824	0.166667
	0	24.5	0.930128	0.0669899	0.0028824	0.166667
	0	24.5167	0.941758	0.0558364	0.00240525	0.2
	0	24.5333	0.941758	0.0558364	0.00240525	0.2
	0	24.55	0.941758	0.0558364	0.00240525	0.2
	0	24.5667	0.941758	0.0558364	0.00240525	0.2
	0	24.5833	0.941758	0.0558364	0.00240525	0.2
	0	24.6	0.941758	0.0558364	0.00240525	0.2
	0	24.6167	0.943603	0.0537183	0.00267898	0.177778
	0	24.6333	0.940818	0.0561366	0.00304509	0.155556
	0	24.65	0.93109	0.0653597	0.00354979	0.133333
	0	24.6667	0.93109	0.0653597	0.00354979	0.133333
	0	24.6833	0.93109	0.0653597	0.00354979	0.133333
	0	24.7	0.944872	0.0522879	0.00284021	0.166667
	0	24.7167	0.936391	0.0603322	0.00327672	0.144444
	0	24.7333	0.940972	0.0559849	0.00304304	0.155556
	0	24.75	0.931229	0.0652244	0.00354631	0.133333
	0	24.7667	0.931229	0.0652244	0.00354631	0.133333
	0	24.7833	0.931229	0.0652244	0.00354631	0.133333
	0	24.8	0.931229	0.0652244	0.00354631	0.133333
	0	24.8167	0.931229	0.0652244	0.00354631	0.133333
	0	24.8333	0.944982	0.0521799	0.00283835	0.166667
	0	24.85	0.936531	0.060197	0.00327202	0.144444
	0	24.8667	0.931249	0.0652077	0.00354306	0.133333
	0	24.8833	0.931249	0.0652077	0.00354306	0.133333
	0	24.9	0.931249	0.0652077	0.00354306	0.133333
	0	24.9167	0.931249	0.0652077	0.00354306	0.133333
	0	24.9333	0.941071	0.0558923	0.00303688	0.155556
	0	24.95	0.936426	0.0603032	0.00327081	0.144444
	0	24.9667	0.944708	0.0524562	0.00283577	0.166667
	0	24.9833	0.950845	0.0466527	0.00250221	0.188889
	0	25	0.955855	0.0419065	0.0022389	0.211111
	0	25.0167	0.959744	0.0382279	0.00202853	0.233333
	0	25.0333	0.959744	0.0382279	0.00202853	0.233333
	0	25.05	0.959744	0.0382279	0.00202853	0.233333
	0	25.0667	0.959744	0.0382279	0.00202853	0.233333
	0	25.0833	0.957731	0.0401392	0.00212963	0.222222
	0	25.1	0.952966	0.044668	0.00236584	0.2
	0	25.1167	0.998388	0.00160309	9.07438e-06	0.166667
	0	25.1333	0.998388	0.00160309	9.07438e-06	0.166667
	0	25.15	0.998388	0.00160309	9.07438e-06	0.166667
	0	25.1667	0.998388	0.00160309	9.07438e-06	0.166667
	0	25.1833	0.998388	0.00160309	9.07438e-06	0.166667
	0	25.2	0.998388	0.00160309	9.07438e-06	0.166667
	0	25.2167	0.998585	0.00140668	8.35207e-06	0.155556
	0	25.2333	0.998349	0.00164113	9.55141e-06	0.133333
	0	25.25	0.998464	0.00153067	5.5102e-06	0.111111
	0	25.2667	0.99854	0.00145703	2.81606e-06	0.1
	0	25.2833	0.99854	0.00145703	2.81606e-06	0.1
	0	25.3	0.99854	0.00145703	2.81606e-06	0.1
	0	25.3167	0.997812	0.00218453	3.09271e-06	0.0666667
	0	25.3333	0.999373	0.000624871	1.64959e-06	0.0777778
	0	25.35	0.999998	8.41346e-07	1.22849e-06	0.0666667
	0	25.3667	0.999998	8.41346e-07	1.22849e-06	0.0666667
	0	25.3833	0.999989	2.23133e-06	8.39411e-06	0.0888889
	0	25.4	0.999987	2.69465e-06	1.07827e-05	0.1
	0	25.4167	0.999987	2.69465e-06	1.07827e-05	0.1
	0	25.4333	0.999987	2.69465e-06	1.07827e-05	0.1
	0	25.45	0.999983	3.46161e-06	1.32893e-05	0.0777778
	0	25.4667	0.999981	4.03683e-06	1.51694e-05	0.0666667
	0	25.4833	0.999977	4.3386e-06	1.88117e-05	0.0555556
	0	25.5	0.999979	3.60904e-06	1.69145e-05	0.0666667
	0	25.5167	0.999979	3.60904e-06	1.69145e-05	0.0666667
	0	25.5333	0.999979	3.60904e-06	1.69145e-05	0.0666667
	0	25.55	0.999979	3.60904e-06	1.69145e-05	0.0666667
	0	25.5667	0.999979	3.60904e-06	1.69145e-05	0.0666667
	0	25.5833	0.999979	3.60904e-06	1.69145e-05	0.0666667
	0	25.6	0.999979	3.60904e-06	1.69145e-05	0.0666667
	0	25.6167	0.999979	3.60904e-06	1.69145e-05	0.0666667
	0	25.6333	0.999928	5.2608e-05	1.91976e-05	0.0888889
	0	25.65	0.999911	6.89409e-05	1.99587e-05	0.1
	0	25.6667	0.99992	6.20469e-05	1.81062e-05	0.111111
	0	25.6833	0.999933	5.17058e-05	1.53275e-05	0.133333
	0	25.7	0.999933	5.17058e-05	1.53275e-05	0.133333
	0	25.7167	0.999933	5.17058e-05	1.53275e-05	0.133333
	0	25.7333	0.999933	5.17058e-05	1.53275e-05	0.133333
	0	25.75	0.999933	5.17058e-05	1.53275e-05	0.133333
	0	25.7667	0.999933	5.17058e-05	1.53275e-05	0.133333
	0	25.7833	0.999933	5.17058e-05	1.53275e-05	0.133333
	0	25.8	0.999921	6.18836e-05	1.76054e-05	0.111111
	0	25.8167	0.999912	6.86688e-05	1.9124e-05	0.1
	0	25.8333	0.999912	6.86688e-05	1.9124e-05	0.1
	0	25.85	0.999912	6.86688e-05	1.9124e-05	0.1
	0	25.8667	0.999886	9.98025e-05	1.37404e-05	0.0666667
	0	25.8833	0.999924	6.6535e-05	9.27239e-06	0.1
	0	25.9	0.999924	6.69775e-05	9.19186e-06	0.1
	0	25.9167	0.993903	0.00608944	7.13632e-06	0.133333
	0	25.9333	0.99337	0.00662488	5.41715e-06	0.122222
	0	25.95	0.991946	0.00805272	8.32712e-07	0.1
	0	25.9667	0.991946	0.00805272	8.32712e-07	0.1
	0	25.9833	0.991946	0.00805272	8.32712e-07	0.1
	0	26	0.991946	0.00805272	8.32712e-07	0.1
	0	26.0167	0.991946	0.00805272	8.32712e-07	0.1
	0	26.0333	0.991946	0.00805272	8.32712e-07	0.1
	0	26.05	0.991946	0.00805272	8.32712e-07	0.1
	0	26.0667	0.991863	0.00813477	1.85361e-06	0.1
	0	26.0833	0.991822	0.00817579	2.36405e-06	0.1
	0	26.1	0.9908	0.00919727	2.57093e-06	0.0888889
	0	26.1167	0.991649	0.0083447	5.84368e-06	0.1
	0	26.1333	0.991649	0.0083447	5.84368e-06	0.1
	0	26.15	0.993625	0.00636851	6.39253e-06	0.0888889
	0	26.1667	0.999656	0.000337197	6.30529e-06	0.0888889
	0	26.1833	0.999747	0.000247862	4.76805e-06	0.122222
	0	26.2	0.999768	0.000227207	4.40831e-06	0.133333
	0	26.2167	0.999768	0.000227207	4.40831e-06	0.133333
	0	26.2333	0.999768	0.000227207	4.40831e-06	0.133333
	0	26.25	0.999768	0.000227207	4.40831e-06	0.133333
	0	26.2667	0.999768	0.000227207	4.40831e-06	0.133333
	0	26.2833	0.999768	0.000227207	4.40831e-06	0.133333
	0	26.3	0.999812	0.000182959	5.16668e-06	0.166667
	0	26.3167	0.999812	0.000182959	5.16668e-06	0.166667
	0	26.3333	0.99984	0.000154304	5.20304e-06	0.144444
	0	26.35	0.999858	0.000136394	5.22577e-06	0.133333
	0	26.3667	0.999858	0.000136394	5.22577e-06	0.133333
	0	26.3833	0.999821	0.000172224	6.59973e-06	0.1
	0	26.4	0.999732	0.000258336	9.67401e-06	0.0666667
	0	26.4167	0.999986	5.96861e-06	8.20013e-06	0.0333333
	0	26.4333	0.999986	5.96861e-06	8.20013e-06	0.0333333
	0	26.45	0.999986	5.96861e-06	8.20013e-06	0.0333333
	0	26.4667	0.999991	3.58178e-06	5.36173e-06	0.0555556
	0	26.4833	0.999992	2.98507e-06	4.65213e-06	0.0666667
	0	26.5	0.999992	2.98507e-06	4.65213e-06	0.0666667
	0	26.5167	0.999992	2.98507e-06	4.65213e-06	0.0666667
	0	26.5333	0.999992	2.98507e-06	4.65213e-06	0.0666667
	0	26.55	0.999992	2.98507e-06	4.65213e-06	0.0666667
	0	26.5667	0.999961	3.57936e-05	3.4987e-06	0.0666667
	0	26.5833	0.999953	4.4741e-05	2.55098e-06	0.0777778
	0	26.6	0.999963	3.47986e-05	2.0563e-06	0.1
	0	26.6167	0.999972	2.60991e-05	1.80548e-06	0.133333
	0	26.6333	0.999972	2.60991e-05	1.80548e-06	0.133333
	0	26.65	0.999972	2.60991e-05	1.80548e-06	0.133333
	0	26.6667	0.999972	2.60991e-05	1.80548e-06	0.133333
	0	26.6833	0.999974	2.40934e-05	1.71441e-06	0.144444
	0	26.7	0.998302	0.00169622	1.65297e-06	0.166667
	0	26.7167	0.998302	0.00169622	1.65297e-06	0.166667
	0	26.7333	0.998302	0.00169622	1.65297e-06	0.166667
	0	26.75	0.998041	0.00195717	1.85728e-06	0.144444
	0	26.7667	0.997878	0.00212027	1.98497e-06	0.133333
	0	26.7833	0.998039	0.00195765	2.86953e-06	0.144444
	0	26.8	0.998298	0.00169745	4.28481e-06	0.166667
	0	26.8167	0.997873	0.00212181	5.09276e-06	0.133333
	0	26.8333	0.999972	2.27325e-05	5.67039e-06	0.111111
	0	26.85	0.999992	2.05979e-06	5.51974e-06	0.1
	0	26.8667	0.999992	2.31417e-06	6.13201e-06	0.0888889
	0	26.8833	0.999991	2.46216e-06	6.86574e-06	0.0625
	0	26.9	0.999989	3.07728e-06	7.96882e-06	0.0666667
	0	26.9167	0.995038	0.00492889	3.283e-05	0.1
	0	26.9333	0.995038	0.00492889	3.283e-05	0.1
	0	26.95	0.995038	0.00492889	3.283e-05	0.1
	0	26.9667	0.995038	0.00492889	3.283e-05	0.1
	0	26.9833	0.995038	0.00492889	3.283e-05	0.1
	0	27	0.995038	0.00492889	3.283e-05	0.1
	0	27.0167	0.995038	0.00492889	3.283e-05	0.1
	0	27.0333	0.995038	0.00492889	3.283e-05	0.1
	0	27.05	0.995038	0.00492889	3.283e-05	0.1
	0	27.0667	0.994418	0.005545	3.66271e-05	0.0888889
	0	27.0833	0.993451	0.00650773	4.14119e-05	0.0777778
	0	27.1	0.996395	0.00358291	2.23771e-05	0.166667
	0	27.1167	0.996395	0.00358291	2.23771e-05	0.166667
	0	27.1333	0.995498	0.00447709	2.46004e-05	0.133333
	0	27.15	0.996141	0.00383751	2.11507e-05	0.155556
	0	27.1667	0.996716	0.00326533	1.91537e-05	0.134146
	0	27.1833	0.996399	0.00358167	1.97708e-05	0.166667
	0	27.2	0.996399	0.00358167	1.97708e-05	0.166667
	0	27.2167	0.996399	0.00358167	1.97708e-05	0.166667
	0	27.2333	0.996399	0.00358167	1.97708e-05	0.166667
	0	27.25	0.996399	0.00358167	1.97708e-05	0.166667
	0	27.2667	0.996624	0.00335782	1.85782e-05	0.177778
	0	27.2833	0.996999	0.00298473	1.65905e-05	0.2
	0	27.3	0.997345	0.00263485	1.97576e-05	0.233333
	0	27.3167	0.997466	0.00251518	1.89715e-05	0.244444
	0	27.3333	0.997616	0.00236482	1.92333e-05	0.244444
	0	27.35	0.998672	0.0013144	1.40015e-05	0.177778
	0	27.3667	0.999766	0.000222303	1.13458e-05	0.133333
	0	27.3833	0.999766	0.000222303	1.13458e-05	0.133333
	0	27.4	0.999766	0.000222303	1.13458e-05	0.133333
	0	27.4167	0.999766	0.000222303	1.13458e-05	0.133333
	0	27.4333	0.999766	0.000222303	1.13458e-05	0.133333
	0	27.45	0.998901	0.00108646	1.30181e-05	0.155556
	0	27.4667	0.998974	0.00101403	1.20997e-05	0.166667
	0	27.4833	0.999105	0.00087265	2.28365e-05	0.2
	0	27.5	0.999105	0.00087265	2.28365e-05	0.2
	0	27.5167	0.999105	0.00087265	2.28365e-05	0.2
	0	27.5333	0.999052	0.000923857	2.40349e-05	0.188889
	0	27.55	0.881964	0.118012	2.41998e-05	0.188889
	0	27.5667	0.83323	0.166747	2.30701e-05	0.2
	0	27.5833	0.83323	0.166747	2.30701e-05	0.2
	0	27.6	0.83323	0.166747	2.30701e-05	0.2
	0	27.6167	0.727324	0.272649	2.65114e-05	0.122222
	0	27.6333	0.666769	0.333199	3.19941e-05	0.1
	0	27.65	0.666769	0.333199	3.19941e-05	0.1
	0	27.6667	0.699985	0.299986	2.89822e-05	0.111111
	0	27.6833	0.74981	0.250166	2.44643e-05	0.133333
	0	27.7	0.74981	0.250166	2.44643e-05	0.133333
	0	27.7167	0.74981	0.250166	2.44643e-05	0.133333
	0	27.7333	0.700611	0.299363	2.62376e-05	0.111111
	0	27.75	0.667812	0.332161	2.74199e-05	0.1
	0	27.7667	0.667812	0.332161	2.74199e-05	0.1
	0	27.7833	0.502252	0.497708	4.01924e-05	0.0666667
	0	27.8	0.502252	0.497708	4.01924e-05	0.0666667
	0	27.8167	0.502252	0.497708	4.01924e-05	0.0666667
	0	27.8333	0.668167	0.331805	2.73221e-05	0.1
	0	27.85	0.668167	0.331805	2.73221e-05	0.1
	0	27.8667	0.668167	0.331805	2.73221e-05	0.1
	0	27.8833	0.668167	0.331805	2.73221e-05	0.1
	0	27.9	0.668167	0.331805	2.73221e-05	0.1
	0	27.9167	0.668167	0.331805	2.73221e-05	0.1
	0	27.9333	0.502372	0.497625	2.72302e-06	0.0666667
	0	27.95	0.751185	0.248813	2.1523e-06	0.0444444
	0	27.9667	0.999998	4.87055e-09	1.58158e-06	0.0333333
	0	27.9833	0.999998	4.87055e-09	1.58158e-06	0.0333333
	0	28	0.999998	4.87055e-09	1.58158e-06	0.0333333
	0	28.0167	0.999998	4.87055e-09	1.58158e-06	0.0333333
	0	28.0333	0.999998	4.87055e-09	1.58158e-06	0.0333333
	0	28.05	0.999998	4.87055e-09	1.58158e-06	0.0222222
	0	28.0667	0.999996	9.956e-07	3.3555e-06	0.0333333
	0	28.0833	0.999996	9.956e-07	3.3555e-06	0.0333333
	0	28.1	0.999997	5.12541e-07	2.05223e-06	0.0666667
	0	28.1167	0.999997	5.12541e-07	2.05223e-06	0.0666667
	0	28.1333	0.999997	5.12541e-07	2.05223e-06	0.0666667
	0	28.15	0.999997	5.12541e-07	2.05223e-06	0.0666667
	0	28.1667	0.999997	5.12541e-07	2.05223e-06	0.0666667
	0	28.1833	0.999997	5.12541e-07	2.05223e-06	0.0666667
	0	28.2	0.999997	5.12541e-07	2.05223e-06	0.0666667
	0	28.2167	0.999919	7.58481e-05	5.30349e-06	0.0888889
	0	28.2333	0.999893	0.00010096	6.38724e-06	0.1
	0	28.25	0.999879	0.000113576	7.09202e-06	0.0888889
	0	28.2667	0.999839	0.000151425	9.20637e-06	0.0666667
	0	28.2833	0.999839	0.000151425	9.20637e-06	0.0666667
	0	28.3	0.999839	0.000151425	9.20637e-06	0.0666667
	0	28.3167	0.999683	0.000301855	1.50572e-05	0.0333333
	0	28.3333	0.999683	0.000301855	1.50572e-05	0.0333333
	0	28.35	0.999683	0.000301855	1.50572e-05	0.0333333
	0	28.3667	0.999683	0.000301855	1.50572e-05	0.0333333
	0	28.3833	0.999683	0.000301855	1.50572e-05	0.0333333
	0	28.4	0.999683	0.000301855	1.50572e-05	0.0333333
	0	28.4167	0.999683	0.000301855	1.50572e-05	0.0333333
	0	28.4333	0.999683	0.000301855	1.50572e-05	0.0333333
	0	28.45	0.999762	0.000226391	1.13291e-05	0.0444444
	0	28.4667	0.999841	0.000150927	7.60091e-06	0.0666667
	0	28.4833	0.999841	0.000150927	7.60091e-06	0.0666667
	0	28.5	0.999841	0.000150927	7.60091e-06	0.0666667
	0	28.5167	0.999841	0.000150927	7.60091e-06	0.0666667
	0	28.5333	0.999881	0.000113196	5.86921e-06	0.0888889
	0	28.55	0.997763	0.00223082	6.25498e-06	0.111111
	0	28.5667	0.992861	0.0071342	5.24691e-06	0.1
	0	28.5833	0.992861	0.0071342	5.24691e-06	0.1
	0	28.6	0.992861	0.0071342	5.24691e-06	0.1
	0	28.6167	0.991968	0.00802597	5.8847e-06	0.0888889
	0	28.6333	0.989291	0.0107013	7.79808e-06	0.0666667
	0	28.65	0.990821	0.00917254	6.72884e-06	0.0777778
	0	28.6667	0.99286	0.0071342	5.30319e-06	0.1
	0	28.6833	0.99286	0.0071342	5.30319e-06	0.1
	0	28.7	0.99286	0.0071342	5.30319e-06	0.1
	0	28.7167	0.99286	0.0071342	5.30319e-06	0.1
	0	28.7333	0.99286	0.0071342	5.30319e-06	0.1
	0	28.75	0.991944	0.00804463	1.10581e-05	0.0888889
	0	28.7667	0.992829	0.00715907	1.22049e-05	0.1
	0	28.7833	0.992829	0.00715907	1.22049e-05	0.1
	0	28.8	0.992829	0.00715907	1.22049e-05	0.1
	0	28.8167	0.994621	0.00536931	9.40272e-06	0.133333
	0	28.8333	0.994621	0.00536931	9.40272e-06	0.133333
	0	28.85	0.997454	0.00252735	1.86735e-05	0.122222
	0	28.8667	0.999451	0.000533189	1.59475e-05	0.133333
	0	28.8833	0.999493	0.000492175	1.47307e-05	0.144444
	0	28.9	0.999561	0.000426552	1.27839e-05	0.166667
	0	28.9167	0.999561	0.000426552	1.27839e-05	0.166667
	0	28.9333	0.999561	0.000426552	1.27839e-05	0.166667
	0	28.95	0.999612	0.000376382	1.1484e-05	0.188889
	0	28.9667	0.999634	0.000355478	1.09424e-05	0.2
	0	28.9833	0.999634	0.000355478	1.09424e-05	0.2
	0	29	0.999634	0.000355478	1.09424e-05	0.2
	0	29.0167	0.999612	0.000376388	1.15784e-05	0.188889
	0	29.0333	0.99956	0.000426573	1.31049e-05	0.166667
	0	29.05	0.999299	0.000686075	1.44446e-05	0.1
	0	29.0667	0.999201	0.000777853	2.12745e-05	0.102564
	0	29.0833	0.999285	0.000694101	2.1248e-05	0.1
	0	29.1	0.999285	0.000694101	2.1248e-05	0.1
	0	29.1167	0.997854	0.00210995	3.56095e-05	0.133333
	0	29.1333	0.997854	0.00210995	3.56095e-05	0.133333
	0	29.15	0.997854	0.00210995	3.56095e-05	0.133333
	0	29.1667	0.99766	0.00230176	3.8689e-05	0.122222
	0	29.1833	0.99714	0.00281324	4.69011e-05	0.1
	0	29.2	0.99714	0.00281324	4.69011e-05	0.1
	0	29.2167	0.99714	0.00281324	4.69011e-05	0.1
	0	29.2333	0.996759	0.0031908	4.98652e-05	0.0666667
	0	29.25	0.996759	0.0031908	4.98652e-05	0.0666667
	0	29.2667	0.997839	0.0021272	3.32995e-05	0.1
	0	29.2833	0.997839	0.0021272	3.32995e-05	0.1
	0	29.3	0.998373	0.00160165	2.56672e-05	0.133333
	0	29.3167	0.998373	0.00160165	2.56672e-05	0.133333
	0	29.3333	0.998373	0.00160165	2.56672e-05	0.133333
	0	29.35	0.998373	0.00160165	2.56672e-05	0.133333
	0	29.3667	0.998373	0.00160165	2.56672e-05	0.133333
	0	29.3833	0.998373	0.00160165	2.56672e-05	0.133333
	0	29.4	0.998373	0.00160165	2.56672e-05	0.133333
	0	29.4167	0.995827	0.00412507	4.83208e-05	0.0888889
	0	29.4333	0.99318	0.0067452	7.449e-05	0.1
	0	29.45	0.99318	0.0067452	7.449e-05	0.1
	0	29.4667	0.99318	0.0067452	7.449e-05	0.1
	0	29.4833	0.99318	0.0067452	7.449e-05	0.1
	0	29.5	0.99318	0.0067452	7.449e-05	0.1
	0	29.5167	0.99318	0.0067452	7.449e-05	0.1
	0	29.5333	0.994885	0.0050589	5.59524e-05	0.133333
	0	29.55	0.993189	0.00673687	7.36797e-05	0.1
	0	29.5667	0.99387	0.00606328	6.64371e-05	0.111111
	0	29.5833	0.994892	0.00505289	5.55731e-05	0.133333
	0	29.6	0.995621	0.00433107	4.76865e-05	0.155556
	0	29.6167	0.996594	0.00336865	3.7171e-05	0.2
	0	29.6333	0.996594	0.00336865	3.7171e-05	0.2
	0	29.65	0.996973	0.00299504	3.19807e-05	0.177778
	0	29.6667	0.9972	0.00277087	2.88665e-05	0.166667
	0	29.6833	0.9972	0.00277087	2.88665e-05	0.166667
	0	29.7	0.9972	0.00277087	2.88665e-05	0.166667
	0	29.7167	0.9965	0.00346359	3.59983e-05	0.133333
	0	29.7333	0.9965	0.00346359	3.59983e-05	0.133333
	0	29.75	0.9965	0.00346359	3.59983e-05	0.133333
	0	29.7667	0.995801	0.00415631	4.31813e-05	0.111111
	0	29.7833	0.9965	0.00346375	3.62155e-05	0.0888889
	0	29.8	0.999998	6.34529e-07	9.52028e-07	0.0666667
	0	29.8167	0.998724	0.00124943	2.65423e-05	0.0777778
	0	29.8333	0.997783	0.00217683	3.99113e-05	0.0666667
	0	29.85	0.997783	0.00217683	3.99113e-05	0.0666667
	0	29.8667	0.997783	0.00217683	3.99113e-05	0.0666667
	0	29.8833	0.997783	0.00217683	3.99113e-05	0.0666667
	0	29.9	0.997783	0.00217683	3.99113e-05	0.0666667
	0	29.9167	0.997783	0.00217683	3.99113e-05	0.0666667
	0	29.9333	0.997783	0.00217683	3.99113e-05	0.0666667
	0	29.95	0.997783	0.00217683	3.99113e-05	0.0666667
	0	29.9667	0.997783	0.00217683	3.99113e-05	0.0666667
	0	29.9833	0.997783	0.00217683	3.99113e-05	0.0666667
	0	30	0.99867	0.00130612	2.41052e-05	0.111111
	0	30.0167	0.998891	0.00108848	2.03293e-05	0.133333
	0	30.0333	0.998976	0.00100515	1.88053e-05	0.144444
	0	30.05	0.999112	0.000871831	1.63669e-05	0.166667
	0	30.0667	0.999112	0.000871831	1.63669e-05	0.166667
	0	30.0833	0.999112	0.000871831	1.63669e-05	0.166667
	0	30.1	0.999112	0.000871831	1.63669e-05	0.166667
	0	30.1167	0.999162	0.000811796	2.60153e-05	0.2
	0	30.1333	0.999229	0.000746279	2.42936e-05	0.222222
	0	30.15	0.999266	0.000710745	2.32133e-05	0.233333
	0	30.1667	0.999649	0.000331148	1.97433e-05	0.211111
	0	30.1833	0.999864	0.000118838	1.69785e-05	0.177778
	0	30.2	0.999838	0.000142619	1.89525e-05	0.144444
	0	30.2167	0.999826	0.000154044	2.03895e-05	0.133333
	0	30.2333	0.999839	0.000142194	1.88937e-05	0.144444
	0	30.25	0.99986	0.000123235	1.65003e-05	0.166667
	0	30.2667	0.99986	0.000123235	1.65003e-05	0.166667
	0	30.2833	0.99986	0.000123235	1.65003e-05	0.166667
	0	30.3	0.99986	0.000123235	1.65003e-05	0.166667
	0	30.3167	0.99986	0.000123235	1.65003e-05	0.166667
	0	30.3333	0.999813	0.000161226	2.58629e-05	0.155556
	0	30.35	0.99983	0.000144981	2.54194e-05	0.188889
	0	30.3667	0.999861	0.000117662	2.15635e-05	0.233333
	0	30.3833	0.999838	0.000137252	2.50151e-05	0.2
	0	30.4	0.999871	0.000102073	2.71325e-05	0.166667
	0	30.4167	0.999871	0.000102073	2.71325e-05	0.166667
	0	30.4333	0.999871	0.000102073	2.71325e-05	0.166667
	0	30.45	0.999851	0.000117776	3.11615e-05	0.144444
	0	30.4667	0.999839	0.000127591	3.36797e-05	0.133333
	0	30.4833	0.999839	0.000127591	3.36797e-05	0.133333
	0	30.5	0.999908	7.11835e-05	2.12478e-05	0.144444
	0	30.5167	0.999858	0.000123324	1.90194e-05	0.144444
	0	30.5333	0.9997	0.000274257	2.53359e-05	0.144444
	0	30.55	0.999739	0.000237791	2.34563e-05	0.166667
	0	30.5667	0.999739	0.000237791	2.34563e-05	0.166667
	0	30.5833	0.999739	0.000237791	2.34563e-05	0.166667
	0	30.6	0.999739	0.000237791	2.34563e-05	0.166667
	0	30.6167	0.999614	0.000363489	2.26734e-05	0.211111
	0	30.6333	0.999647	0.000332271	2.07062e-05	0.233333
	0	30.65	0.988726	0.0112548	1.89261e-05	0.255556
	0	30.6667	0.981657	0.0183234	1.92857e-05	0.233333
	0	30.6833	0.9786	0.0213773	2.2422e-05	0.2
	0	30.7	0.981657	0.0183234	1.92556e-05	0.233333
	0	30.7167	0.981657	0.0183234	1.92556e-05	0.233333
	0	30.7333	0.981657	0.0183234	1.92556e-05	0.233333
	0	30.75	0.978644	0.0213433	1.25153e-05	0.2
	0	30.7667	0.978644	0.0213433	1.25153e-05	0.2
	0	30.7833	0.982459	0.0175272	1.41659e-05	0.244444
	0	30.8	0.993874	0.00611023	1.61076e-05	0.244444
	0	30.8167	0.999579	0.000403996	1.68635e-05	0.233333
	0	30.8333	0.999588	0.000394907	1.67462e-05	0.211111
	0	30.85	0.999614	0.000369458	1.64176e-05	0.166667
	0	30.8667	0.999557	0.00042618	1.72144e-05	0.144444
	0	30.8833	0.999481	0.000500352	1.91391e-05	0.122222
	0	30.9	0.999411	0.000568313	2.07358e-05	0.111111
	0	30.9167	0.999521	0.000462109	1.66765e-05	0.122222
	0	30.9333	0.999665	0.00032008	1.46836e-05	0.1
	0	30.95	0.999665	0.00032008	1.46836e-05	0.1
	0	30.9667	0.999623	0.00036009	1.64943e-05	0.0888889
	0	30.9833	0.999498	0.00048012	2.19264e-05	0.0666667
	0	31	0.999498	0.00048012	2.19264e-05	0.0666667
	0	31.0167	0.999498	0.00048012	2.19264e-05	0.0666667
	0	31.0333	0.999498	0.00048012	2.19264e-05	0.0666667
	0	31.05	0.999498	0.00048012	2.19264e-05	0.0666667
	0	31.0667	0.958664	0.0413144	2.1878e-05	0.0777778
	0	31.0833	0.904218	0.0957602	2.18135e-05	0.1
	0	31.1	0.904218	0.0957602	2.18135e-05	0.1
	0	31.1167	0.877833	0.122142	2.45161e-05	0.0888889
	0	31.1333	0.88496	0.115018	2.19254e-05	0.1
	0	31.15	0.88496	0.115018	2.19254e-05	0.1
	0	31.1667	0.88496	0.115018	2.19254e-05	0.1
	0	31.1833	0.88496	0.115018	2.19254e-05	0.1
	0	31.2	0.896614	0.103374	1.18633e-05	0.111111
	0	31.2167	0.88521	0.114781	8.40489e-06	0.1
	0	31.2333	0.88521	0.114781	8.40489e-06	0.1
	0	31.25	0.868992	0.130998	1.04636e-05	0.0777778
	0	31.2667	0.856828	0.14316	1.20076e-05	0.0666667
	0	31.2833	0.856828	0.14316	1.20076e-05	0.0666667
	0	31.3	0.856828	0.14316	1.20076e-05	0.0666667
	0	31.3167	0.856828	0.14316	1.20076e-05	0.0666667
	0	31.3333	0.856828	0.14316	1.20076e-05	0.0666667
	0	31.35	0.89262	0.10737	9.3974e-06	0.0888889
	0	31.3667	0.904551	0.0954402	8.52732e-06	0.1
	0	31.3833	0.856828	0.14316	1.15772e-05	0.0666667
	0	31.4	0.856828	0.14316	1.15772e-05	0.0666667
	0	31.4167	0.999998	1.40185e-09	1.5667e-06	0.0333333
	0	31.4333	0.999997	1.35869e-07	2.50444e-06	0.0444444
	0	31.45	0.999996	2.70336e-07	3.44218e-06	0.0666667
	0	31.4667	0.999996	2.70336e-07	3.44218e-06	0.0666667
	0	31.4833	0.999996	2.70336e-07	3.44218e-06	0.0666667
	0	31.5	0.999996	2.70336e-07	3.44218e-06	0.0666667
	0	31.5167	0.999996	2.70336e-07	3.44218e-06	0.0666667
	0	31.5333	0.999996	2.70336e-07	3.44218e-06	0.0666667
	0	31.55	0.999995	4.04803e-07	4.37992e-06	0.0444444
	0	31.5667	0.999994	5.3927e-07	5.31766e-06	0.0333333
	0	31.5833	0.999994	5.3927e-07	5.31766e-06	0.0333333
	0	31.6	0.999994	5.3927e-07	5.31766e-06	0.0333333
	0	31.6167	0.999994	5.3927e-07	5.31766e-06	0.0333333
	0	31.6333	0.999994	5.3927e-07	5.31766e-06	0.0333333
	0	31.65	0.999967	1.73853e-05	1.52355e-05	0.0888889
	0	31.6667	0.999974	1.39083e-05	1.22287e-05	0.111111
	0	31.6833	0.999978	1.15903e-05	1.02493e-05	0.133333
	0	31.7	0.999975	1.42139e-05	1.07026e-05	0.122222
	0	31.7167	0.999974	1.60425e-05	1.02628e-05	0.133333
	0	31.7333	0.999977	1.37549e-05	8.90494e-06	0.155556
	0	31.75	0.999979	1.28399e-05	8.36178e-06	0.166667
	0	31.7667	0.999976	1.48153e-05	9.64046e-06	0.144444
	0	31.7833	0.999974	1.60499e-05	1.04396e-05	0.133333
	0	31.8	0.999974	1.60499e-05	1.04396e-05	0.133333
	0	31.8167	0.999968	1.92598e-05	1.24571e-05	0.111111
	0	31.8333	0.999965	2.13997e-05	1.3802e-05	0.1
	0	31.85	0.999965	2.13997e-05	1.3802e-05	0.1
	0	31.8667	0.999965	2.13997e-05	1.3802e-05	0.1
	0	31.8833	0.999965	2.13997e-05	1.3802e-05	0.1
	0	31.9	0.999965	2.13997e-05	1.3802e-05	0.1
	0	31.9167	0.999965	2.13997e-05	1.3802e-05	0.1
	0	31.9333	0.999965	2.13997e-05	1.3802e-05	0.1
	0	31.95	0.999948	3.20848e-05	2.03242e-05	0.0666667
	0	31.9667	0.999933	3.89532e-05	2.78005e-05	0.0444444
	0	31.9833	0.999919	4.58216e-05	3.52768e-05	0.0333333
	0	32	0.999919	4.58216e-05	3.52768e-05	0.0111111
	0	32.0167				0
	0	32.0333				0
	0	32.05	0.999997	1.58209e-08	3.20102e-06	0.0333333
	0	32.0667	0.999998	1.18656e-08	2.40912e-06	0.0444444
	0	32.0833	0.999998	7.91043e-09	1.61722e-06	0.0666667
	0	32.1	0.999998	7.91043e-09	1.61722e-06	0.0666667
	0	32.1167	0.999998	7.91043e-09	1.61722e-06	0.0666667
	0	32.1333	0.999998	7.91043e-09	1.61722e-06	0.0666667
	0	32.15	0.999998	7.91043e-09	1.61722e-06	0.0666667
	0	32.1667	0.999918	7.57261e-05	6.0444e-06	0.1
	0	32.1833	0.999918	7.57261e-05	6.0444e-06	0.1
	0	32.2	0.999918	7.57261e-05	6.0444e-06	0.1
	0	32.2167	0.999877	0.000113589	9.04989e-06	0.0666667
	0	32.2333	0.999877	0.000113589	9.04989e-06	0.0666667
	0	32.25	0.999877	0.000113589	9.04989e-06	0.0666667
	0	32.2667	0.999894	9.74414e-05	8.26237e-06	0.0777778
	0	32.2833	0.999938	5.69324e-05	5.51506e-06	0.133333
	0	32.3	0.999938	5.69297e-05	5.06486e-06	0.133333
	0	32.3167	0.999938	5.69297e-05	5.06486e-06	0.133333
	0	32.3333	0.999938	5.69297e-05	5.06486e-06	0.133333
	0	32.35	0.999938	5.69297e-05	5.06486e-06	0.133333
	0	32.3667	0.999938	5.69297e-05	5.06486e-06	0.133333
	0	32.3833	0.999978	1.90693e-05	2.59751e-06	0.133333
	0	32.4	0.999997	1.1231e-06	2.17315e-06	0.166667
	0	32.4167	0.999997	1.1231e-06	2.17315e-06	0.166667
	0	32.4333	0.999997	9.3592e-07	1.86391e-06	0.2
	0	32.45	0.999997	8.86694e-07	1.8514e-06	0.211111
	0	32.4667	0.999997	8.02305e-07	1.82996e-06	0.233333
	0	32.4833	0.999997	8.4242e-07	1.89646e-06	0.222222
	0	32.5	0.999997	8.4863e-07	2.01258e-06	0.222222
	0	32.5167	0.999997	9.65576e-07	2.00395e-06	0.188889
	0	32.5333	0.999997	1.02031e-06	1.79951e-06	0.166667
	0	32.55	0.999997	1.17728e-06	2.0618e-06	0.144444
	0	32.5667	0.999996	1.27539e-06	2.22573e-06	0.133333
	0	32.5833	0.999996	1.27539e-06	2.22573e-06	0.133333
	0	32.6	0.999996	1.27539e-06	2.22573e-06	0.133333
	0	32.6167	0.999996	1.27539e-06	2.22573e-06	0.133333
	0	32.6333	0.999996	1.39133e-06	2.39918e-06	0.122222
	0	32.65	0.999995	1.70051e-06	2.86172e-06	0.1
	0	32.6667	0.999998	2.1236e-08	1.58738e-06	0.0666667
	0	32.6833	0.999999	1.60191e-08	1.3889e-06	0.0888889
	0	32.7	0.999999	2.11133e-08	1.17102e-06	0.0666667
	0	32.7167	0.999999	1.69643e-08	1.09551e-06	0.0555556
	0	32.7333	0.999999	3.68218e-10	7.93491e-07	0.0333333
	0	32.75	0.999999	3.68218e-10	7.93491e-07	0.0333333
	0	32.7667	0.999999	3.68218e-10	7.93491e-07	0.0333333
	0	32.7833	0.999999	3.68218e-10	7.93491e-07	0.0333333
	0	32.8	0.999999	3.68218e-10	7.93491e-07	0.0333333
	0	32.8167	0.999999	3.68218e-10	7.93491e-07	0.0333333
	0	32.8333	0.999999	3.68218e-10	7.93491e-07	0.0333333
	0	32.85	0.999999	3.68218e-10	7.93491e-07	0.0333333
	0	32.8667	0.999999	2.82383e-10	6.38716e-07	0.0444444
	0	32.8833	1	1.96548e-10	4.83942e-07	0.0666667
	0	32.9	1	1.10714e-10	3.29167e-07	0.0444444
	0	32.9167	1	2.48787e-11	1.74392e-07	0.0333333
	0	32.9333	1	2.48787e-11	1.74392e-07	0.0333333
	0	32.95	0.999998	1.14049e-07	1.9624e-06	0.0666667
	0	32.9667	0.999998	1.14049e-07	1.9624e-06	0.0666667
	0	32.9833	0.999998	1.14049e-07	1.9624e-06	0.0666667
	0	33	0.999998	1.14049e-07	1.9624e-06	0.0666667
	0	33.0167	0.999997	1.71061e-07	2.8564e-06	0.0444444
[truncated: 41,230 more rows]
