# Supplementary material for: Accept–reject decision-making revealed via a quantitative and ethological study of C. elegans foraging
Source: eLife. 2025 Sep 10;13:RP103191. doi: 10.7554/eLife.103191 (PMC12422737; doi:10.7554/eLife.103191)
Supplement: Figure 2—source data 12. [file elife-103191-fig2-data12.xlsx]

## Sheet: Sheet1
Figure 2 - Source Data 12
Figure 2N - Time before first exploitation
Summary Statistics
	label	OD600	growth time (hr)	relative density	# worms	saturation	time before first exploit (min)	p(only exploit)	τ	p value		* mean of mean time before first exploitation (min) for each animal
	0	0	1	0.01	30	0.8	59.9939	1	-0.583131	6.66894e-74		* in cases where no exploitation is observed (i.e. p(exploit) < 0.5 for all encounters), the last observed time point is used
	0.2	0.05	1	0.226252	23	0.73375	59.7394	1				* p(only exploit) gives the fraction of animals that were not observed to exploit during the time window
	0.3	0.1	1	0.283734	25	0.713375	58.5765	0.96				* p value calculated using Kendall's τ rank correlation coefficient (test of monotonicity)
	0.5	0.5	1	0.48652	35	0.664843	45.8593	0.457143
	1	1	1	1.12995	46	0.589005	34.5964	0.152174
	2	2	1	2.23926	44	0.527447	26.9422	0.0227273
	3	3	1	2.91659	48	0.503663	27.5614	0.0833333
	5	4	1	5.04816	44	0.454288	27.5429	0.0909091
	6	5	1	5.87791	50	0.440592	24.0802	0.04
	10	10	1	10	50	0.392767	14.9292	0
	50	1	12	53.4889	20	0.241847	2.30515	0
	200	1	48	213.259	28	0.117375	0.244319	0
Sigmoid (y = d + (a-d)/(1 + (x/c)^b)
	a	b	c	d	r-squared
	2.33732e-14	-5.5901	3.29382	62.3313	0.643475
Source Data
	worm #	label	time before first exploit (min)	only explores		* time (min) before first exploitation (or last observed time point) for each worm
	1	2	43.0856	FALSE		* animals that only explored (i.e. p(exploit) < 0.5 for all encounters)
	2	2	22.9516	FALSE
	3	2	39.0677	FALSE
	4	2	12.7095	FALSE
	5	6	21.6011	FALSE
	6	6	30.4872	FALSE
	7	6	16.8719	FALSE
	8	6	13.5598	FALSE
	9	10	17.0882	FALSE
	10	10	10.3808	FALSE
	11	10	12.8926	FALSE
	12	10	17.216	FALSE
	13	0	59.9894	TRUE
	14	0	59.9894	TRUE
	15	0.2	59.9964	TRUE
	16	0.2	59.9964	TRUE
	17	0.2	59.9964	TRUE
	18	5	59.995	TRUE
	19	5	19.1944	FALSE
	20	5	27.6524	FALSE
	21	5	13.8984	FALSE
	22	3	30.3205	FALSE
	23	3	17.8611	FALSE
	24	3	46.1754	FALSE
	25	3	36.6614	FALSE
	26	5	59.995	TRUE
	27	5	26.9022	FALSE
	28	5	2.82859	FALSE
	29	3	2.01729	FALSE
	30	3	53.2943	FALSE
	31	3	41.9908	FALSE
	32	3	14.9213	FALSE
	33	6	22.9455	FALSE
	34	6	6.16843	FALSE
	35	6	10.4141	FALSE
	36	6	28.0358	FALSE
	37	0.5	59.9908	TRUE
	38	0.5	27.9865	FALSE
	39	0.5	59.9908	TRUE
	40	0.5	20.6342	FALSE
	41	0	59.9964	TRUE
	42	0	59.9964	TRUE
	43	0	59.9964	TRUE
	44	0	59.9964	TRUE
	45	10	3.02309	FALSE
	46	10	4.72913	FALSE
	47	10	4.45683	FALSE
	48	10	8.91367	FALSE
	49	1	17.5999	FALSE
	50	1	7.11332	FALSE
	51	1	22.5792	FALSE
	52	1	18.4891	FALSE
	53	0.3	59.9894	TRUE
	54	0.3	59.9894	TRUE
	55	0.3	59.9894	TRUE
	56	0.3	59.9894	TRUE
	57	2	18.2223	FALSE
	58	2	32.8102	FALSE
	59	2	49.5209	FALSE
	60	2	12.7039	FALSE
	61	3	8.30794	FALSE
	62	0.2	59.4129	TRUE
	63	10	16.1324	FALSE
	64	0	59.9964	TRUE
	65	5	40.1726	FALSE
	66	0.3	24.5798	FALSE
	67	1	22.8955	FALSE
	68	0.5	51.3048	FALSE
	69	2	20.1613	FALSE
	70	6	30.1038	FALSE
	71	2	7.2076	FALSE
	72	2	8.17454	FALSE
	73	2	13.2093	FALSE
	74	2	32.8927	FALSE
	75	0.3	59.995	TRUE
	76	0.3	59.995	TRUE
	77	0.3	59.995	TRUE
	78	0.2	59.9962	TRUE
	79	0.2	59.9962	TRUE
	80	3	14.393	FALSE
	81	3	14.4375	FALSE
	82	3	4.37903	FALSE
	83	3	12.8037	FALSE
	84	0.5	50.1098	FALSE
	85	0.5	39.5621	FALSE
	86	0.5	47.02	FALSE
	87	0.5	39.8011	FALSE
	88	5	24.1403	FALSE
	89	5	31.7091	FALSE
	90	5	24.9627	FALSE
	91	5	22.3342	FALSE
	92	6	29.1812	FALSE
	93	6	14.5767	FALSE
	94	6	19.6116	FALSE
	95	1	18.6942	FALSE
	96	1	32.8928	FALSE
	97	1	32.0536	FALSE
	98	1	42.6845	FALSE
	99	10	18.6224	FALSE
	100	10	6.88545	FALSE
	101	10	19.456	FALSE
	102	10	46.731	FALSE
	103	2	15.4544	FALSE
	104	2	16.8159	FALSE
	105	1	31.4985	FALSE
	106	1	10.3921	FALSE
	107	1	14.1432	FALSE
	108	1	13.882	FALSE
	109	0	59.995	TRUE
	110	0	59.995	TRUE
	111	0	59.995	TRUE
	112	0	59.995	TRUE
	113	5	26.0747	FALSE
	114	3	13.8262	FALSE
	115	3	22.0119	FALSE
	116	3	13.2482	FALSE
	117	3	33.8986	FALSE
	118	0.3	59.9908	TRUE
	119	0.3	59.9908	TRUE
	120	0.5	36.0881	FALSE
	121	0.5	59.995	TRUE
	122	10	6.97992	FALSE
	123	6	27.3301	FALSE
	124	6	29.0472	FALSE
	125	6	21.3784	FALSE
	126	6	12.8926	FALSE
	127	0.2	59.9894	TRUE
	128	0.2	59.9894	TRUE
	129	1	39.8346	FALSE
	130	1	25.6191	FALSE
	131	1	32.1933	FALSE
	132	1	39.7957	FALSE
	133	10	22.0008	FALSE
	134	10	17.9885	FALSE
	135	10	20.9227	FALSE
	136	10	23.5012	FALSE
	137	3	18.628	FALSE
	138	3	20.3619	FALSE
	139	3	16.0327	FALSE
	140	3	36.4446	FALSE
	141	5	18.0941	FALSE
	142	5	18.5887	FALSE
	143	2	6.32418	FALSE
	144	6	23.1955	FALSE
	145	6	17.1382	FALSE
	146	6	3.6566	FALSE
	147	0.5	28.2588	FALSE
	148	0.5	47.0257	FALSE
	149	0.5	34.4607	FALSE
	150	2	8.54689	FALSE
	151	2	40.5005	FALSE
	152	2	20.7226	FALSE
	153	2	28.197	FALSE
	154	1	16.8997	FALSE
	155	1	59.9964	TRUE
	156	1	19.3004	FALSE
	157	5	30.1594	FALSE
	158	5	25.8024	FALSE
	159	5	39.1733	FALSE
	160	5	15.0269	FALSE
	161	3	31.7146	FALSE
	162	3	16.1213	FALSE
	163	3	16.7604	FALSE
	164	3	14.7765	FALSE
	165	0.3	59.9964	TRUE
	166	0.5	25.5407	FALSE
	167	0.5	33.3762	FALSE
	168	0.5	59.995	TRUE
	169	10	27.0695	FALSE
	170	10	18.9892	FALSE
	171	10	27.9809	FALSE
	172	10	15.6437	FALSE
	173	6	45.2574	FALSE
	174	6	17.2383	FALSE
	175	6	39.7947	FALSE
	176	6	32.9483	FALSE
	177	0.2	54.7046	TRUE
	178	1	20.2507	FALSE
	179	1	59.9908	TRUE
	180	1	59.9908	TRUE
	181	1	49.8321	FALSE
	182	10	15.5545	FALSE
	183	10	6.04062	FALSE
	184	10	16.7659	FALSE
	185	10	8.43575	FALSE
	186	3	31.5876	FALSE
	187	3	27.0639	FALSE
	188	3	47.2591	FALSE
	189	3	34.4718	FALSE
	190	5	4.81805	FALSE
	191	2	36.4335	FALSE
	192	2	50.9825	FALSE
	193	2	52.922	FALSE
	194	2	40.5737	FALSE
	195	6	27.5697	FALSE
	196	6	19.3782	FALSE
	197	6	25.3356	FALSE
	198	0	59.995	TRUE
	199	0	59.995	TRUE
	200	0	59.995	TRUE
	201	0.5	59.863	TRUE
	202	0.2	59.9894	TRUE
	203	0.2	59.9894	TRUE
	204	0.2	59.9894	TRUE
	205	5	8.44706	FALSE
	206	5	26.1915	FALSE
	207	5	22.8682	FALSE
	208	5	22.4625	FALSE
	209	10	12.4536	FALSE
	210	10	10.5919	FALSE
	211	10	16.5659	FALSE
	212	10	9.2082	FALSE
	213	3	59.9964	TRUE
	214	3	48.4261	FALSE
	215	3	28.9756	FALSE
	216	3	37.3505	FALSE
	217	0.5	59.995	TRUE
	218	0.5	36.316	FALSE
	219	0.5	48.7195	FALSE
	220	0.5	12.6314	FALSE
	221	0	59.9964	TRUE
	222	1	33.9319	FALSE
	223	1	15.221	FALSE
	224	2	49.8432	FALSE
	225	2	23.2405	FALSE
	226	2	20.5286	FALSE
	227	2	33.5048	FALSE
	228	6	46.6478	FALSE
	229	6	26.8417	FALSE
	230	6	24.4242	FALSE
	231	6	5.65731	FALSE
	232	200	0	FALSE
	233	200	0	FALSE
	234	200	0	FALSE
	235	200	0	FALSE
	236	200	0	FALSE
	237	200	0	FALSE
	238	200	0	FALSE
	239	200	0	FALSE
	240	2	29.8085	FALSE
	241	2	19.1777	FALSE
	242	2	1.92277	FALSE
	243	2	14.2874	FALSE
	244	0	59.9964	TRUE
	245	0	59.9964	TRUE
	246	0	59.9964	TRUE
	247	0	59.9964	TRUE
	248	0.3	59.995	TRUE
	249	0.3	59.995	TRUE
	250	0.3	59.995	TRUE
	251	0.2	59.9964	TRUE
	252	0.2	59.9964	TRUE
	253	0.2	59.9964	TRUE
	254	3	20.3669	FALSE
	255	3	43.0679	FALSE
	256	3	12.3146	FALSE
	257	0.5	59.9964	TRUE
	258	0.5	59.9964	TRUE
	259	5	42.1899	FALSE
	260	5	46.7912	FALSE
	261	5	27.13	FALSE
	262	5	30.8199	FALSE
	263	6	19.1504	FALSE
	264	6	20.423	FALSE
	265	6	19.5616	FALSE
	266	6	31.1541	FALSE
	267	1	57.6499	FALSE
	268	1	59.9894	TRUE
	269	1	45.3852	FALSE
	270	1	25.5184	FALSE
	271	10	14.5156	FALSE
	272	10	10.8978	FALSE
	273	10	15.616	FALSE
	274	10	25.9358	FALSE
	275	6	18.083	FALSE
	276	6	16.2991	FALSE
	277	6	18.672	FALSE
	278	6	30.3531	FALSE
	279	6	27.164	FALSE
	280	6	12.1427	FALSE
	281	6	37.8951	FALSE
	282	6	26.4749	FALSE
	283	5	20.2502	FALSE
	284	5	25.724	FALSE
	285	5	36.5605	FALSE
	286	5	21.1283	FALSE
	287	5	31.6654	FALSE
	288	5	10.381	FALSE
	289	5	9.56963	FALSE
	290	5	19.9506	FALSE
	291	200	0	FALSE
	292	200	2.58407	FALSE
	293	200	0	FALSE
	294	200	0	FALSE
	295	200	0	FALSE
	296	200	2.85088	FALSE
	297	200	0	FALSE
	298	200	0.311208	FALSE
	299	1	56.3328	FALSE
	300	1	54.7935	FALSE
	301	1	36.7772	FALSE
	302	1	16.5881	FALSE
	303	1	59.9908	TRUE
	304	1	37.6561	FALSE
	305	1	36.9837	FALSE
	306	1	40.8404	FALSE
	307	0	59.995	TRUE
	308	0	59.995	TRUE
	309	0	59.995	TRUE
	310	10	23.7846	FALSE
	311	10	18.9999	FALSE
	312	10	8.95257	FALSE
	313	10	9.93618	FALSE
	314	10	4.40692	FALSE
	315	10	8.30813	FALSE
	316	10	5.66842	FALSE
	317	10	8.95833	FALSE
	318	3	33.5374	FALSE
	319	3	32.2981	FALSE
	320	3	29.4584	FALSE
	321	3	26.6743	FALSE
	322	0.2	59.9964	TRUE
	323	0.2	59.9964	TRUE
	324	0.2	59.9964	TRUE
	325	0.2	59.9964	TRUE
	326	2	9.61965	FALSE
	327	2	24.6299	FALSE
	328	2	22.846	FALSE
	329	2	21.9902	FALSE
	330	0.3	59.995	TRUE
	331	0.3	59.995	TRUE
	332	0.3	59.995	TRUE
	333	0.3	59.995	TRUE
	334	200	0	FALSE
	335	200	0	FALSE
	336	200	0	FALSE
	337	200	0.461243	FALSE
	338	200	0	FALSE
	339	200	0.63353	FALSE
	340	200	0	FALSE
	341	200	0	FALSE
	342	0.5	59.9894	TRUE
	343	0.5	59.9894	TRUE
	344	0.5	59.9894	TRUE
	345	0.5	59.9894	TRUE
	346	2	56.5105	FALSE
	347	2	30.0252	FALSE
	348	2	31.3644	FALSE
	349	2	24.5347	FALSE
	350	0.2	59.9962	TRUE
	351	0.2	59.9962	TRUE
	352	0.2	59.9962	TRUE
	353	0.2	59.9962	TRUE
	354	50	0.238957	FALSE
	355	50	0.944712	FALSE
	356	50	1.25035	FALSE
	357	50	0.955826	FALSE
	358	0.3	59.9906	TRUE
	359	0.3	59.9906	TRUE
	360	0.3	59.9906	TRUE
	361	0.3	59.9906	TRUE
	362	5	27.5189	FALSE
	363	5	16.0879	FALSE
	364	5	26.8132	FALSE
	365	5	24.0068	FALSE
	366	50	3.08984	FALSE
	367	50	3.61222	FALSE
	368	50	5.93515	FALSE
	369	50	7.71348	FALSE
	370	6	5.81276	FALSE
	371	6	6.21287	FALSE
	372	6	22.7676	FALSE
	373	6	5.94057	FALSE
	374	1	59.9962	TRUE
	375	1	59.9962	TRUE
	376	1	53.5831	FALSE
	377	1	33.4047	FALSE
	378	0.5	59.9892	TRUE
	379	0.5	59.9892	TRUE
	380	0.5	59.9892	TRUE
	381	0.5	59.9892	TRUE
	382	0	59.9906	TRUE
	383	0	59.9906	TRUE
	384	0	59.9906	TRUE
	385	0	59.9906	TRUE
	386	3	7.441	FALSE
	387	3	3.11199	FALSE
	388	3	24.0902	FALSE
	389	3	11.6422	FALSE
	390	10	16.2717	FALSE
	391	10	8.11916	FALSE
	392	10	17.9388	FALSE
	393	10	12.9317	FALSE
	394	200	0	FALSE
	395	200	0	FALSE
	396	200	0	FALSE
	397	200	0	FALSE
	398	50	2.23958	FALSE
	399	50	9.45846	FALSE
	400	50	2.08397	FALSE
	401	50	7.31891	FALSE
	402	2	25.9963	FALSE
	403	2	59.9948	TRUE
	404	2	10.942	FALSE
	405	2	44.5015	FALSE
	406	0	59.9906	TRUE
	407	0	59.9906	TRUE
	408	0	59.9906	TRUE
	409	0	59.9906	TRUE
	410	0.3	59.9948	TRUE
	411	0.3	59.9948	TRUE
	412	0.3	59.9948	TRUE
	413	50	0	FALSE
	414	50	0	FALSE
	415	50	0	FALSE
	416	50	0	FALSE
	417	0.5	15.8493	FALSE
	418	0.5	36.2167	FALSE
	419	0.5	14.4378	FALSE
	420	3	59.9962	TRUE
	421	3	59.9962	TRUE
	422	3	32.4377	FALSE
	423	3	59.9962	TRUE
	424	50	0.828012	FALSE
	425	50	0	FALSE
	426	50	0.433456	FALSE
	427	50	0	FALSE
	428	5	48.6471	FALSE
	429	5	15.171	FALSE
	430	5	59.9948	TRUE
	431	5	59.9948	TRUE
	432	6	59.9906	TRUE
	433	6	44.9027	FALSE
	434	6	31.732	FALSE
	435	6	59.9906	TRUE
	436	1	31.5423	FALSE
	437	1	24.9015	FALSE
	438	1	20.4169	FALSE
	439	1	21.3116	FALSE
	440	10	17.4442	FALSE
	441	10	11.9203	FALSE
	442	10	26.3081	FALSE
	443	10	16.3272	FALSE
