# Supplementary material for: Accept–reject decision-making revealed via a quantitative and ethological study of C. elegans foraging
Source: eLife. 2025 Sep 10;13:RP103191. doi: 10.7554/eLife.103191 (PMC12422737; doi:10.7554/eLife.103191)
Supplement: Figure 2—source data 13. [file elife-103191-fig2-data13.xlsx]

## Sheet: Sheet1
Figure 2 - Source Data 13
Figure 2O - Number of encounters before first exploitation
Summary Statistics
	label	OD600	growth time (hr)	relative density	# worms	saturation	# encounters before first exploit	p(only exploit)	τ	p value		* mean of # encounters before first exploitation (min) for each animal
	0	0	1	0.01	30	0.8	24.7667	1	-0.524278	9.50792e-59		* in cases where no exploitation is observed (i.e. p(exploit) < 0.5 for all encounters), the total # of observed encounters is used
	0.2	0.05	1	0.226252	23	0.73375	21.9565	1				* p(only exploit) gives the fraction of animals that were not observed to exploit during the time window
	0.3	0.1	1	0.283734	25	0.713375	27.08	0.96				* p value calculated using Kendall's τ rank correlation coefficient (test of monotonicity)
	0.5	0.5	1	0.48652	35	0.664843	18.7143	0.457143
	1	1	1	1.12995	46	0.589005	14.9348	0.152174
	2	2	1	2.23926	44	0.527447	10.5455	0.0227273
	3	3	1	2.91659	48	0.503663	10.2292	0.0833333
	5	4	1	5.04816	44	0.454288	10.3409	0.0909091
	6	5	1	5.87791	50	0.440592	8.74	0.04
	10	10	1	10	50	0.392767	4.82	0
	50	1	12	53.4889	20	0.241847	1.35	0
	200	1	48	213.259	28	0.117375	0.0714286	0
Sigmoid (y = d + (a-d)/(1 + (x/c)^b)
	a	b	c	d	r-squared
	9.23742e-07	-6.18901	3.246	25.6691	0.457493
Source Data
	worm #	label	# encounters before first exploit (min)	only explores		* # encounters before first exploitation (or total observed encounters) for each worm
	1	2	12	FALSE		* animals that only explored (i.e. p(exploit) < 0.5 for all encounters)
	2	2	5	FALSE
	3	2	3	FALSE
	4	2	8	FALSE
	5	6	2	FALSE
	6	6	7	FALSE
	7	6	1	FALSE
	8	6	4	FALSE
	9	10	6	FALSE
	10	10	3	FALSE
	11	10	3	FALSE
	12	10	4	FALSE
	13	0	20	TRUE
	14	0	18	TRUE
	15	0.2	11	TRUE
	16	0.2	9	TRUE
	17	0.2	6	TRUE
	18	5	14	TRUE
	19	5	2	FALSE
	20	5	2	FALSE
	21	5	1	FALSE
	22	3	6	FALSE
	23	3	8	FALSE
	24	3	6	FALSE
	25	3	10	FALSE
	26	5	17	TRUE
	27	5	9	FALSE
	28	5	1	FALSE
	29	3	1	FALSE
	30	3	17	FALSE
	31	3	9	FALSE
	32	3	8	FALSE
	33	6	11	FALSE
	34	6	2	FALSE
	35	6	5	FALSE
	36	6	9	FALSE
	37	0.5	22	TRUE
	38	0.5	14	FALSE
	39	0.5	11	TRUE
	40	0.5	12	FALSE
	41	0	25	TRUE
	42	0	13	TRUE
	43	0	19	TRUE
	44	0	19	TRUE
	45	10	2	FALSE
	46	10	1	FALSE
	47	10	1	FALSE
	48	10	4	FALSE
	49	1	6	FALSE
	50	1	1	FALSE
	51	1	6	FALSE
	52	1	8	FALSE
	53	0.3	36	TRUE
	54	0.3	28	TRUE
	55	0.3	34	TRUE
	56	0.3	24	TRUE
	57	2	9	FALSE
	58	2	19	FALSE
	59	2	17	FALSE
	60	2	5	FALSE
	61	3	1	FALSE
	62	0.2	13	TRUE
	63	10	6	FALSE
	64	0	9	TRUE
	65	5	13	FALSE
	66	0.3	9	FALSE
	67	1	7	FALSE
	68	0.5	18	FALSE
	69	2	7	FALSE
	70	6	7	FALSE
	71	2	2	FALSE
	72	2	2	FALSE
	73	2	3	FALSE
	74	2	7	FALSE
	75	0.3	11	TRUE
	76	0.3	13	TRUE
	77	0.3	25	TRUE
	78	0.2	18	TRUE
	79	0.2	14	TRUE
	80	3	2	FALSE
	81	3	4	FALSE
	82	3	3	FALSE
	83	3	3	FALSE
	84	0.5	12	FALSE
	85	0.5	10	FALSE
	86	0.5	11	FALSE
	87	0.5	6	FALSE
	88	5	3	FALSE
	89	5	11	FALSE
	90	5	6	FALSE
	91	5	4	FALSE
	92	6	4	FALSE
	93	6	2	FALSE
	94	6	3	FALSE
	95	1	6	FALSE
	96	1	2	FALSE
	97	1	3	FALSE
	98	1	12	FALSE
	99	10	0	FALSE
	100	10	1	FALSE
	101	10	3	FALSE
	102	10	5	FALSE
	103	2	4	FALSE
	104	2	2	FALSE
	105	1	7	FALSE
	106	1	4	FALSE
	107	1	3	FALSE
	108	1	6	FALSE
	109	0	10	TRUE
	110	0	16	TRUE
	111	0	9	TRUE
	112	0	15	TRUE
	113	5	1	FALSE
	114	3	4	FALSE
	115	3	3	FALSE
	116	3	6	FALSE
	117	3	7	FALSE
	118	0.3	16	TRUE
	119	0.3	16	TRUE
	120	0.5	9	FALSE
	121	0.5	13	TRUE
	122	10	1	FALSE
	123	6	4	FALSE
	124	6	8	FALSE
	125	6	6	FALSE
	126	6	5	FALSE
	127	0.2	19	TRUE
	128	0.2	35	TRUE
	129	1	16	FALSE
	130	1	11	FALSE
	131	1	13	FALSE
	132	1	15	FALSE
	133	10	7	FALSE
	134	10	5	FALSE
	135	10	3	FALSE
	136	10	7	FALSE
	137	3	4	FALSE
	138	3	6	FALSE
	139	3	7	FALSE
	140	3	11	FALSE
	141	5	5	FALSE
	142	5	2	FALSE
	143	2	2	FALSE
	144	6	3	FALSE
	145	6	8	FALSE
	146	6	1	FALSE
	147	0.5	14	FALSE
	148	0.5	22	FALSE
	149	0.5	16	FALSE
	150	2	4	FALSE
	151	2	8	FALSE
	152	2	11	FALSE
	153	2	9	FALSE
	154	1	6	FALSE
	155	1	23	TRUE
	156	1	5	FALSE
	157	5	16	FALSE
	158	5	12	FALSE
	159	5	18	FALSE
	160	5	4	FALSE
	161	3	20	FALSE
	162	3	10	FALSE
	163	3	9	FALSE
	164	3	4	FALSE
	165	0.3	46	TRUE
	166	0.5	10	FALSE
	167	0.5	16	FALSE
	168	0.5	30	TRUE
	169	10	9	FALSE
	170	10	9	FALSE
	171	10	7	FALSE
	172	10	2	FALSE
	173	6	10	FALSE
	174	6	12	FALSE
	175	6	15	FALSE
	176	6	16	FALSE
	177	0.2	33	TRUE
	178	1	13	FALSE
	179	1	31	TRUE
	180	1	41	TRUE
	181	1	23	FALSE
	182	10	8	FALSE
	183	10	2	FALSE
	184	10	5	FALSE
	185	10	3	FALSE
	186	3	15	FALSE
	187	3	13	FALSE
	188	3	27	FALSE
	189	3	20	FALSE
	190	5	1	FALSE
	191	2	12	FALSE
	192	2	17	FALSE
	193	2	23	FALSE
	194	2	21	FALSE
	195	6	10	FALSE
	196	6	8	FALSE
	197	6	12	FALSE
	198	0	34	TRUE
	199	0	20	TRUE
	200	0	26	TRUE
	201	0.5	27	TRUE
	202	0.2	27	TRUE
	203	0.2	22	TRUE
	204	0.2	23	TRUE
	205	5	2	FALSE
	206	5	10	FALSE
	207	5	7	FALSE
	208	5	9	FALSE
	209	10	4	FALSE
	210	10	5	FALSE
	211	10	6	FALSE
	212	10	2	FALSE
	213	3	23	TRUE
	214	3	24	FALSE
	215	3	12	FALSE
	216	3	15	FALSE
	217	0.5	29	TRUE
	218	0.5	23	FALSE
	219	0.5	18	FALSE
	220	0.5	3	FALSE
	221	0	27	TRUE
	222	1	18	FALSE
	223	1	2	FALSE
	224	2	23	FALSE
	225	2	6	FALSE
	226	2	12	FALSE
	227	2	9	FALSE
	228	6	16	FALSE
	229	6	12	FALSE
	230	6	5	FALSE
	231	6	3	FALSE
	232	200	0	FALSE
	233	200	0	FALSE
	234	200	0	FALSE
	235	200	0	FALSE
	236	200	0	FALSE
	237	200	0	FALSE
	238	200	0	FALSE
	239	200	0	FALSE
	240	2	12	FALSE
	241	2	8	FALSE
	242	2	1	FALSE
	243	2	4	FALSE
	244	0	27	TRUE
	245	0	21	TRUE
	246	0	23	TRUE
	247	0	21	TRUE
	248	0.3	35	TRUE
	249	0.3	20	TRUE
	250	0.3	31	TRUE
	251	0.2	14	TRUE
	252	0.2	17	TRUE
	253	0.2	27	TRUE
	254	3	8	FALSE
	255	3	11	FALSE
	256	3	1	FALSE
	257	0.5	14	TRUE
	258	0.5	26	TRUE
	259	5	14	FALSE
	260	5	17	FALSE
	261	5	13	FALSE
	262	5	8	FALSE
	263	6	9	FALSE
	264	6	8	FALSE
	265	6	5	FALSE
	266	6	10	FALSE
	267	1	29	FALSE
	268	1	34	TRUE
	269	1	27	FALSE
	270	1	13	FALSE
	271	10	4	FALSE
	272	10	6	FALSE
	273	10	7	FALSE
	274	10	8	FALSE
	275	6	4	FALSE
	276	6	6	FALSE
	277	6	14	FALSE
	278	6	11	FALSE
	279	6	3	FALSE
	280	6	7	FALSE
	281	6	15	FALSE
	282	6	9	FALSE
	283	5	10	FALSE
	284	5	9	FALSE
	285	5	17	FALSE
	286	5	6	FALSE
	287	5	7	FALSE
	288	5	7	FALSE
	289	5	5	FALSE
	290	5	7	FALSE
	291	200	0	FALSE
	292	200	1	FALSE
	293	200	0	FALSE
	294	200	0	FALSE
	295	200	0	FALSE
	296	200	1	FALSE
	297	200	0	FALSE
	298	200	0	FALSE
	299	1	31	FALSE
	300	1	19	FALSE
	301	1	13	FALSE
	302	1	7	FALSE
	303	1	33	TRUE
	304	1	22	FALSE
	305	1	13	FALSE
	306	1	16	FALSE
	307	0	32	TRUE
	308	0	25	TRUE
	309	0	32	TRUE
	310	10	12	FALSE
	311	10	3	FALSE
	312	10	3	FALSE
	313	10	5	FALSE
	314	10	3	FALSE
	315	10	3	FALSE
	316	10	2	FALSE
	317	10	3	FALSE
	318	3	8	FALSE
	319	3	14	FALSE
	320	3	8	FALSE
	321	3	5	FALSE
	322	0.2	24	TRUE
	323	0.2	16	TRUE
	324	0.2	19	TRUE
	325	0.2	30	TRUE
	326	2	5	FALSE
	327	2	10	FALSE
	328	2	7	FALSE
	329	2	6	FALSE
	330	0.3	38	TRUE
	331	0.3	20	TRUE
	332	0.3	20	TRUE
	333	0.3	19	TRUE
	334	200	0	FALSE
	335	200	0	FALSE
	336	200	0	FALSE
	337	200	0	FALSE
	338	200	0	FALSE
	339	200	0	FALSE
	340	200	0	FALSE
	341	200	0	FALSE
	342	0.5	32	TRUE
	343	0.5	22	TRUE
	344	0.5	20	TRUE
	345	0.5	26	TRUE
	346	2	34	FALSE
	347	2	13	FALSE
	348	2	13	FALSE
	349	2	12	FALSE
	350	0.2	26	TRUE
	351	0.2	33	TRUE
	352	0.2	36	TRUE
	353	0.2	33	TRUE
	354	50	0	FALSE
	355	50	1	FALSE
	356	50	1	FALSE
	357	50	0	FALSE
	358	0.3	31	TRUE
	359	0.3	24	TRUE
	360	0.3	35	TRUE
	361	0.3	37	TRUE
	362	5	14	FALSE
	363	5	8	FALSE
	364	5	15	FALSE
	365	5	12	FALSE
	366	50	1	FALSE
	367	50	3	FALSE
	368	50	3	FALSE
	369	50	5	FALSE
	370	6	1	FALSE
	371	6	2	FALSE
	372	6	11	FALSE
	373	6	3	FALSE
	374	1	25	TRUE
	375	1	20	TRUE
	376	1	19	FALSE
	377	1	20	FALSE
	378	0.5	37	TRUE
	379	0.5	32	TRUE
	380	0.5	47	TRUE
	381	0.5	33	TRUE
	382	0	40	TRUE
	383	0	36	TRUE
	384	0	24	TRUE
	385	0	33	TRUE
	386	3	3	FALSE
	387	3	1	FALSE
	388	3	17	FALSE
	389	3	4	FALSE
	390	10	7	FALSE
	391	10	0	FALSE
	392	10	9	FALSE
	393	10	8	FALSE
	394	200	0	FALSE
	395	200	0	FALSE
	396	200	0	FALSE
	397	200	0	FALSE
	398	50	1	FALSE
	399	50	6	FALSE
	400	50	2	FALSE
	401	50	4	FALSE
	402	2	14	FALSE
	403	2	37	TRUE
	404	2	2	FALSE
	405	2	24	FALSE
	406	0	37	TRUE
	407	0	36	TRUE
	408	0	35	TRUE
	409	0	41	TRUE
	410	0.3	40	TRUE
	411	0.3	34	TRUE
	412	0.3	35	TRUE
	413	50	0	FALSE
	414	50	0	FALSE
	415	50	0	FALSE
	416	50	0	FALSE
	417	0.5	6	FALSE
	418	0.5	9	FALSE
	419	0.5	5	FALSE
	420	3	19	TRUE
	421	3	32	TRUE
	422	3	19	FALSE
	423	3	23	TRUE
	424	50	0	FALSE
	425	50	0	FALSE
	426	50	0	FALSE
	427	50	0	FALSE
	428	5	23	FALSE
	429	5	10	FALSE
	430	5	42	TRUE
	431	5	41	TRUE
	432	6	31	TRUE
	433	6	25	FALSE
	434	6	26	FALSE
	435	6	26	TRUE
	436	1	19	FALSE
	437	1	18	FALSE
	438	1	11	FALSE
	439	1	10	FALSE
	440	10	14	FALSE
	441	10	6	FALSE
	442	10	6	FALSE
	443	10	8	FALSE
