# Supplementary material for: Accept–reject decision-making revealed via a quantitative and ethological study of C. elegans foraging
Source: eLife. 2025 Sep 10;13:RP103191. doi: 10.7554/eLife.103191 (PMC12422737; doi:10.7554/eLife.103191)
Supplement: Figure 3—source data 1. [file elife-103191-fig3-data1.xlsx]

## Sheet: Sheet1
Figure 3 - Source Data 1
Figure 3A - Relative density of large (20 μL) bacterial patches
Summary Statistics
	OD600	growth time (hr)	mean relative density	std relative density	label	saturation		* relative density was estimated as described in methods and Figure 2 - supplement 1-3
	0	1	0.01	0	0	0.8		* bacteria-free patches were assigned a relative density 0.01 for use in log-based calculations
	0.05	1	2.65804	0.346991	3	0.512017		* condition labels use rounded relative density estimates for ease of reading
	0.1	1	3.23782	0.345864	3	0.494259		* saturation gives the grayscale color value from 0 (black) to 1 (white) for each condition
	0.5	1	5.48433	0.218534	5	0.446829
	1	1	12.4594	0.360928	10	0.372977
	2	1	23.0125	0.754587	20	0.317757
	3	1	34.0824	0.813439	30	0.28241
	4	1	50.3501	0.901069	50	0.24729
	5	1	65.6495	1.15909	70	0.22341
	10	1	108.856	1.28123	100	0.177898
	1	48	379.454	0.000515305	400	0.0655141
