# Supplementary material for: Accept–reject decision-making revealed via a quantitative and ethological study of C. elegans foraging
Source: eLife. 2025 Sep 10;13:RP103191. doi: 10.7554/eLife.103191 (PMC12422737; doi:10.7554/eLife.103191)
Supplement: Figure 3—source data 2. [file elife-103191-fig3-data2.xlsx]

## Sheet: Sheet1
Figure 3 - Source Data 2
Figure 3B - Relative density of small (0.5 μL) bacterial patches
Summary Statistics
	OD600	growth time (hr)	mean relative density	std relative density	label	saturation		* relative density was estimated as described in methods and Figure 2 - supplement 1-3
	0	1	0.01	0	0	0.8		* bacteria-free patches were assigned a relative density 0.01 for use in log-based calculations
	0.5	1	0.468996	0.0529025	0.5	0.668145		* condition labels use rounded relative density estimates for ease of reading
	1	1	1.10472	0.0461198	1	0.591037		* saturation gives the grayscale color value from 0 (black) to 1 (white) for each condition
	5	1	5.74238	0.432547	6	0.442691
	10	1	9.75347	0.780159	10	0.395014
	1	48	228.352	6.55762	200	0.11122
