# Supplementary material for: Accept–reject decision-making revealed via a quantitative and ethological study of C. elegans foraging
Source: eLife. 2025 Sep 10;13:RP103191. doi: 10.7554/eLife.103191 (PMC12422737; doi:10.7554/eLife.103191)
Supplement: Figure 3—source data 3. [file elife-103191-fig3-data3.xlsx]

## Sheet: Sheet1
Figure 3 - Source Data 3
Figure 3F - Encounter classification as explore or exploit and sense or no response
Summary Statistics
	label	OD600	growth time (hr)	# worms	# encounters
	0	0	1	8	20
	3	0.05	1	11	60
	3	0.1	1	14	39
	5	0.5	1	13	36
	10	1	1	15	35
	20	2	1	15	17
	30	3	1	14	27
	50	4	1	15	19
	70	5	1	15	21
	100	10	1	16	20
	400	1	48	8	8
Source Data
	label	worm #	encounter #	encounter start (min)	encounter duration (min)	log10(duration)	mean velocity on patch (μm/s)	log10(velocity)	min. velocity on patch (μm/s)	Δ velocity (μm/s^2)	max. Δ velocity (μm/s^2)	p(exploit)	p(explore)	p(sense)	p(no response)		* posterior probability of classification as explore or exploit as estimated by the Gaussian Mixture Model described in methods and Figure 2 - supplement 6
	30	1	1	10.2196	49.7754	1.69701	46.0325	1.66306	9.40479	-25.1482	182.403	1	9.40016e-09	0.998791	0.00120891		* posterior probability of classification as sense or no response as estimated by semi-supervised Quadratic Discriminant Analysis (QDA) described in methods, Figure 2I, Figure 2 - supplement 8, and Video 5
	30	2	1	0.372329	1.48932	0.172987	124.895	2.09654	40.9346	0.338496	117.671	0.0390601	0.96094	0.82959	0.17041		* RGB value calculation: p(exploit)*[0 114 178] + p(explore)*p(sense)*[0 158 115] + p(explore)*p(no response)*[230 159 0]
	30	2	2	2.97863	1.99502	0.299946	100.319	2.00138	41.2269	-13.056	130.97	0.223046	0.776954	0.88243	0.11757
	30	2	3	5.59605	1.77273	0.248643	108.028	2.03354	55.6063	-18.1168	140.359	0.120192	0.879808	0.930344	0.0696564
	30	2	4	25.7185	34.2765	1.535	45.5424	1.65842	8.55867	-17.973	188.4	1	1.34755e-07	0.993773	0.00622682
	30	3	1	0	0.766887	-0.115269	157.87	2.1983	109.826	-1.49184	55.481	0.00100001	0.999	0.191517	0.808483
	30	3	2	35.9381	24.0569	1.38124	50.5038	1.70332	9.73966	-11.5196	141.69	0.999999	1.35752e-06	0.946235	0.0537652
	30	4	1	5.96838	0.750215	-0.124814	106.571	2.02764	37.7601	-13.069	171.133	0.00384324	0.996157	0.968335	0.0316649
	30	4	2	7.90227	1.3226	0.121429	127.704	2.1062	49.6831	-16.3692	119.281	0.0216081	0.978392	0.903286	0.0967138
	30	4	3	13.715	2.22286	0.346912	75.6956	1.87907	30.1169	-18.0382	189.399	0.476557	0.523443	0.991943	0.00805723
	30	4	4	18.9443	1.79496	0.254055	90.6167	1.95721	27.0274	-18.0067	159.405	0.185382	0.814618	0.981875	0.0181246
	30	4	5	47.1246	12.8704	1.10959	51.1319	1.70869	13.6913	-21.2799	191.644	0.99993	6.97887e-05	0.996764	0.00323613
	100	5	1	4.40136	55.595	1.74504	46.7453	1.66974	4.37132	-17.0893	245.901	1	4.06571e-09	0.999703	0.000296927
	100	6	1	33.1714	26.825	1.42854	38.7611	1.5884	8.2333	-0.02556	27.3241	0.999999	8.08922e-07	0.689842	0.310158
	100	7	1	30.2649	29.7314	1.47322	40.8899	1.61162	8.98308	-11.3496	109.698	1	3.92745e-07	0.913674	0.0863264
	100	8	1	0.728003	59.2684	1.77282	51.0133	1.70768	5.76839	-4.83558	169.925	1	2.19504e-09	0.986969	0.0130309
	3	9	1	24.1514	25.6963	1.40987	59.4826	1.77439	9.56774	2.01029	127.205	0.999999	7.90306e-07	0.956997	0.043003
	3	9	2	50.6923	9.30267	0.968607	78.9351	1.89727	14.8721	-17.4008	176.856	0.999417	0.000583224	0.989564	0.0104355
	3	10	1	30.4198	6.89086	0.838274	61.1817	1.78662	23.0945	-4.81245	119.168	0.997271	0.00272869	0.844194	0.155806
	3	10	2	52.7262	7.26875	0.86146	55.7514	1.74626	19.5729	-12.0716	139.968	0.998106	0.00189352	0.938624	0.0613757
	3	11	1	56.9385	3.05643	0.485215	44.7405	1.6507	17.147	-20.1183	157.608	0.907735	0.0922655	0.99119	0.00880971
	3	12	1	15.2266	3.6566	0.563078	76.8378	1.88558	31.6579	-7.62818	152.821	0.905961	0.0940385	0.940328	0.059672
	3	12	2	19.7279	1.4393	0.158152	101.583	2.00682	57.6877	-11.5022	120.779	0.059298	0.940702	0.689923	0.310077
	3	12	3	39.8503	20.1447	1.30416	58.4838	1.76704	0	-1.10032	176.193	0.999996	4.10384e-06	0.996212	0.00378769
	50	13	1	23.1016	36.8892	1.5669	39.1922	1.5932	6.16603	-25.6495	179.573	1	9.64133e-08	0.999005	0.000995116
	50	14	1	15.3548	44.6361	1.64969	36.6362	1.56391	5.89965	-18.739	162.725	1	2.84072e-08	0.989883	0.0101166
	50	15	1	15.9327	44.0581	1.64403	42.6059	1.62947	6.48345	-19.6138	161.72	1	2.51968e-08	0.991721	0.00827883
	70	16	1	16.2491	43.7459	1.64094	47.1595	1.67357	10.143	-14.6508	185.295	1	2.32006e-08	0.990149	0.00985136
	70	17	1	27.1022	32.8928	1.5171	45.6481	1.65942	0.458745	-4.9893	184.46	1	1.7848e-07	0.994741	0.00525898
	70	18	1	47.0468	12.9482	1.11221	38.0114	1.57991	12.2083	-17.9426	145.018	0.999932	6.77732e-05	0.983428	0.0165719
	70	19	1	28.9916	31.0033	1.49141	44.1143	1.64458	9.62589	-28.1352	195.075	1	2.76002e-07	0.999652	0.000348101
	5	20	1	0.661316	0.922508	-0.0350298	180.389	2.25621	128.189	0.589604	53.3505	0.00136094	0.998639	0.000508512	0.999491
	5	20	2	3.26768	0.905836	-0.0429502	150.531	2.17763	50.4377	12.1655	167.842	0.00240681	0.997593	0.999969	3.06729e-05
	5	20	3	4.97932	1.39488	0.144536	125.479	2.09857	57.1103	-18.7836	122.243	0.0288089	0.971191	0.930384	0.069616
	5	20	4	8.30813	0.894722	-0.048312	138.118	2.14025	102.903	-11.9201	113.293	0.00309404	0.996906	0.0691653	0.930835
	5	20	5	11.0812	0.761347	-0.118417	120.931	2.08254	45.7848	-22.8066	151.418	0.00258935	0.997411	0.99048	0.0095203
	5	20	6	13.0151	3.42328	0.534443	123.687	2.09232	46.7943	-0.83693	174.103	0.738903	0.261097	0.992926	0.00707433
	5	20	7	25.5301	34.4607	1.53732	51.0273	1.7078	12.2825	7.1496	191.564	1	1.15756e-07	0.999974	2.55887e-05
	5	21	1	17.3776	2.12288	0.326926	88.5954	1.94741	27.6567	3.05316	165.171	0.340837	0.659163	0.997371	0.00262919
	5	21	2	21.3066	1.80056	0.255407	105.594	2.02364	51.2418	-6.18059	128.225	0.134908	0.865092	0.7377	0.2623
	5	21	3	27.2418	32.749	1.5152	52.9416	1.7238	11.5732	-1.47829	198.749	1	1.59877e-07	0.999388	0.000612304
	3	22	1	1.21146	0.661301	-0.179601	204.726	2.31117	173.259	3.82253	80.0381	0.000193024	0.999807	6.72741e-06	0.999993
	3	22	2	37.6275	2.57852	0.41137	84.9766	1.9293	41.1888	-21.5566	170.954	0.586917	0.413083	0.990605	0.0093954
	3	22	3	42.1065	17.8885	1.25257	65.0053	1.81295	12.5674	-4.05413	140.398	0.999991	8.76556e-06	0.941335	0.0586645
	3	23	1	35.9159	1.78384	0.251357	102.338	2.01004	51.1508	0.870786	177.797	0.139446	0.860554	0.996693	0.00330654
	10	24	1	40.457	19.5338	1.29079	43.6183	1.63967	9.85525	-11.8622	144.969	0.999994	5.61531e-06	0.951951	0.0480485
	10	25	1	0	1.01698	0.00731325	145.276	2.16219	105.826	-2.42539	74.7922	0.00449349	0.995507	0.235997	0.764003
	10	25	2	6.37976	1.57271	0.196649	114.184	2.0576	41.2143	-1.74476	147.486	0.0632461	0.936754	0.948524	0.0514755
	10	25	3	30.8651	29.1257	1.46428	42.2976	1.62632	6.72959	-18.1259	208.138	1	4.36261e-07	0.997265	0.00273526
	10	26	1	0.861378	1.04477	0.01902	178.935	2.2527	33.8952	0.965823	144.304	0.0024727	0.997527	0.971476	0.028524
	10	26	2	7.16333	3.07873	0.488372	61.3163	1.78758	27.776	-0.876156	207.502	0.85931	0.14069	0.999777	0.000222979
	10	26	3	23.4795	36.5113	1.56243	45.8031	1.66089	5.82159	-9.46406	196.606	1	8.6431e-08	0.995408	0.00459249
	10	27	1	9.75858	2.2896	0.359759	68.1214	1.83328	14.4124	-19.5881	218.759	0.565582	0.434418	0.998527	0.00147307
	10	27	2	19.9006	40.0902	1.60304	46.8711	1.67091	4.40387	-14.1035	215.987	1	4.36085e-08	0.998053	0.0019469
	20	28	1	26.2075	33.7875	1.52876	45.2618	1.65573	7.2749	-9.87126	194.103	1	1.49726e-07	0.99439	0.00561026
	20	29	1	4.41238	1.84497	0.26599	108.468	2.0353	31.972	-4.42376	218.23	0.140145	0.859855	0.99971	0.000289884
	20	29	2	8.00785	1.76717	0.247279	104.953	2.021	34.3768	-19.1128	157.448	0.126841	0.873159	0.982077	0.017923
	20	30	1	51.0702	8.92478	0.950598	41.554	1.61861	12.486	-13.2765	174.196	0.999467	0.000533152	0.982876	0.0171239
	20	31	1	43.6681	16.3269	1.2129	55.9512	1.74781	12.4447	-7.5741	137.136	0.999984	1.61142e-05	0.922733	0.077267
	0	32	1	35.9334	0.666873	-0.175957	169.589	2.2294	93.7554	-4.60327	107.579	0.000425785	0.999574	0.0793825	0.920618
	0	32	2	39.1066	0.972524	-0.0120998	194.783	2.28955	135.47	-5.78251	136.782	0.00131071	0.998689	0.00644448	0.993556
	0	33	1	13.5042	0.733561	-0.134564	182.904	2.26222	157.053	-6.47763	64.1447	0.000471853	0.999528	2.25742e-05	0.999977
	0	33	2	35.2609	0.705774	-0.151334	197.14	2.29478	169.959	2.25343	40.0148	0.000297451	0.999703	1.33426e-06	0.999999
	0	33	3	39.0955	1.55048	0.190466	179.649	2.25443	104.14	-1.98666	119.455	0.0163198	0.98368	0.0736993	0.926301
	0	33	4	47.3313	0.805805	-0.0937698	180.576	2.25666	138.629	-2.69897	87.7576	0.000743978	0.999256	0.000439079	0.999561
	0	34	1	30.4039	0.361223	-0.442224	169.625	2.22949	99.3708	-13.4927	104.627	4.20647e-05	0.999958	0.105662	0.894338
	0	35	1	57.4122	0.233406	-0.631889	180.005	2.25528	151.895	0.166056	39.4403	7.6343e-06	0.999992	1.74149e-05	0.999983
	3	36	1	2.78969	1.09476	0.0393182	178.852	2.25249	74.4379	-10.8545	178.636	0.00307768	0.996922	0.905066	0.0949336
	3	36	2	5.23483	0.4668	-0.330869	168.37	2.22627	95.2125	-22.2655	138.275	0.000108901	0.999891	0.759063	0.240937
	3	36	3	6.07952	1.2448	0.0951	174.151	2.24093	88.1874	-18.043	159.13	0.00617162	0.993828	0.716187	0.283813
	3	36	4	8.04119	1.4004	0.146253	185.918	2.26932	67.8048	-9.35507	187.246	0.00884745	0.991153	0.964821	0.0351794
	3	36	5	11.9534	1.15033	0.0608224	169.574	2.22936	60.2484	-0.214884	174.818	0.00464819	0.995352	0.991232	0.0087682
	3	36	6	19.5278	40.4672	1.6071	49.8611	1.69776	4.75689	-9.64244	175.287	1	3.7932e-08	0.984127	0.015873
	3	37	1	1.07253	0.733544	-0.134574	132.534	2.12233	24.5007	-4.53938	197.679	0.00160319	0.998397	0.998205	0.00179508
	3	37	2	3.51768	3.50656	0.544881	105.783	2.02441	32.4631	-17.1743	173.645	0.814185	0.185815	0.983178	0.0168216
	3	37	3	19.3667	1.62824	0.21172	118.867	2.07506	41.1657	-15.3286	206.503	0.0661807	0.933819	0.994597	0.00540297
	3	37	4	24.4348	1.86164	0.269897	107.006	2.02941	51.0235	5.14045	195.592	0.149747	0.850253	0.999925	7.49031e-05
	3	37	5	36.5994	16.727	1.22342	58.9952	1.77082	8.1611	-23.5691	248.388	0.999986	1.3723e-05	0.999798	0.000202137
	3	37	6	54.7824	5.21261	0.717055	53.1687	1.72566	17.4414	-8.73773	159.997	0.989662	0.0103382	0.965362	0.0346377
	3	38	1	1.04474	0.861358	-0.0648163	252.342	2.40199	139.46	-17.5815	118.636	0.000277959	0.999722	0.00548385	0.994516
	3	38	2	2.15062	0.783558	-0.105929	197.077	2.29464	128.296	-13.8783	163.125	0.000470584	0.999529	0.0485228	0.951477
	3	38	3	3.28983	1.13922	0.0566059	231.588	2.36472	150.14	-8.55773	158.42	0.00150705	0.998493	0.00381508	0.996185
	3	38	4	4.70135	0.416786	-0.380087	252.088	2.40155	171.068	-13.5041	171.918	1.13688e-05	0.999989	0.000509997	0.99949
	3	38	5	16.9493	0.627958	-0.20207	158.727	2.20065	50.7791	-28.6446	200.907	0.00043438	0.999566	0.999221	0.000778581
	3	38	6	18.5442	0.95583	-0.0196195	105.982	2.02523	45.6193	-18.2261	187.518	0.00990995	0.99009	0.986766	0.0132335
	3	38	7	20.3114	1.17812	0.0711879	91.7889	1.96279	30.8864	-11.5601	167.364	0.035097	0.964903	0.967435	0.0325654
	3	38	8	22.5287	1.18367	0.0732316	149.49	2.17461	46.119	-13.1778	155.322	0.00803549	0.991965	0.924821	0.0751792
	3	38	9	24.0458	0.99473	-0.00229496	150.792	2.17838	74.8185	-15.8716	169.066	0.00359072	0.996409	0.865889	0.134111
	3	38	10	25.963	1.0892	0.0371081	120.397	2.08062	70.7094	-9.63927	97.4159	0.0111954	0.988805	0.335692	0.664308
	3	38	11	27.7024	27.8747	1.44521	65.8402	1.81849	6.33021	-1.80638	186.443	1	4.22326e-07	0.998	0.00199991
	3	38	12	57.3109	2.28399	0.358694	128.459	2.10877	57.6849	-9.81597	216.659	0.232458	0.767542	0.997461	0.00253864
	50	39	1	5.06824	54.9226	1.73975	47.1053	1.67307	2.1162	5.63126	47.7946	1	4.39893e-09	0.697754	0.302246
	50	40	1	0	0.872493	-0.0592382	174.577	2.24199	48.2649	8.95022	121.324	0.00119659	0.998803	0.946541	0.0534594
	50	40	2	2.71751	57.2733	1.75795	44.73	1.6506	8.40274	-14.8272	244.487	1	3.4926e-09	0.999734	0.000265853
	50	41	1	28.1643	31.8265	1.50279	35.188	1.54639	9.82864	0.248246	126.725	1	2.92982e-07	0.938263	0.0617366
	50	42	1	1.16703	1.77277	0.248653	101.398	2.00603	58.9621	-3.54634	124.084	0.138888	0.861112	0.652797	0.347203
	50	42	2	13.2541	46.7367	1.66966	45.015	1.65336	10.9347	-9.48271	129.779	1	1.5325e-08	0.914449	0.0855512
	100	43	1	5.61272	54.3823	1.73546	37.769	1.57714	2.66687	-15.4382	281.05	1	6.70896e-09	0.999988	1.19523e-05
	100	44	1	0	59.995	1.77811	47.4179	1.67594	3.38289	-1.94135	91.7901	1	2.24717e-09	0.844925	0.155075
	100	45	1	9.14707	50.8479	1.70627	47.5337	1.677	7.85882	-18.7496	223.325	1	7.6782e-09	0.998782	0.001218
	100	46	1	3.33985	56.6551	1.75324	48.3235	1.68416	6.3032	-20.2037	272.891	1	3.35484e-09	0.999957	4.31713e-05
	30	47	1	0	59.9964	1.77813	55.9653	1.74792	11.6867	-2.97601	80.9206	1	1.73446e-09	0.763363	0.236637
	30	48	1	0	59.9964	1.77813	45.2739	1.65585	4.40677	-0.621223	173.45	1	2.42232e-09	0.825898	0.174102
	30	49	1	1.08923	17.3665	1.23971	57.1971	1.75737	15.3954	-10.1447	241.72	0.999989	1.08382e-05	0.999856	0.000144148
	30	49	2	29.637	30.3594	1.48229	43.5656	1.63914	7.45258	-14.8843	336.908	1	3.21717e-07	1	1.25847e-08
	5	50	1	30.2142	29.7752	1.47385	37.0943	1.56931	6.66872	-16.6856	179.1	1	4.28101e-07	0.989961	0.0100385
	5	51	1	1.76162	1.18923	0.0752658	96.4138	1.98414	44.395	-15.3821	121.563	0.0316053	0.968395	0.90337	0.0966303
	5	51	2	3.78442	4.50129	0.653337	99.5131	1.99788	21.1076	-29.0634	239.713	0.950241	0.0497595	0.999895	0.000105487
	5	51	3	33.0928	26.8966	1.4297	41.1803	1.61469	10.1628	-17.7261	266.56	0.999999	7.54702e-07	0.999942	5.84811e-05
	5	52	1	11.0476	48.9418	1.68968	45.2014	1.65515	8.8039	-12.1096	210.02	1	1.09114e-08	0.99752	0.00247971
	5	53	1	21.6562	38.3332	1.58358	39.4361	1.59589	5.93961	-22.5161	266.175	1	7.35818e-08	0.999927	7.29138e-05
	0	54	1	1.00031	1.78389	0.251367	136.452	2.13498	66.3712	-1.3485	91.0601	0.0696043	0.930396	0.273612	0.726388
	10	55	1	3.37875	0.750215	-0.124814	145.738	2.16357	101.928	-4.95411	130.249	0.0012325	0.998768	0.111427	0.888573
	10	55	2	4.41238	12.9982	1.11388	104.079	2.01736	20.0943	-22.2111	272.518	0.99992	8.01938e-05	0.999956	4.38851e-05
	10	55	3	20.178	39.817	1.60007	45.6175	1.65913	5.48751	-11.0526	238.09	1	4.72769e-08	0.999742	0.000257568
	10	56	1	0	0.3112	-0.50696	122.039	2.0865	98.1655	-0.884882	23.8735	0.000118317	0.999882	0.339857	0.660143
	10	56	2	1.76162	1.25036	0.0970345	123.248	2.09078	49.362	-27.4077	192.718	0.018792	0.981208	0.998658	0.00134208
	10	56	3	6.04618	1.11699	0.0480481	113.624	2.05547	61.2339	-22.012	268.709	0.0149309	0.985069	0.999874	0.000125769
	10	56	4	7.37989	52.6151	1.72111	36.8766	1.56675	3.72316	-22.7439	208.877	1	8.83795e-09	0.998674	0.00132557
	10	57	1	0	0.700201	-0.154777	155.124	2.19068	91.7211	5.46035	37.7701	0.000735368	0.999265	0.443431	0.556569
	10	57	2	1.30593	3.66772	0.564396	111.71	2.04809	33.4274	2.47424	237.237	0.834488	0.165512	0.999999	1.42768e-06
	10	57	3	5.43489	54.5601	1.73688	44.3053	1.64646	6.50191	-29.1097	249.279	1	5.07608e-09	0.999933	6.74909e-05
	20	58	1	5.12937	54.867	1.73931	41.8811	1.62202	7.01928	-14.1551	170.897	1	5.32191e-09	0.982497	0.0175031
	20	59	1	3.79006	56.2063	1.74979	41.7568	1.62073	5.74702	-5.74421	299.569	1	4.48192e-09	1	3.55278e-08
	20	60	1	14.1766	45.8198	1.66105	39.1078	1.59226	5.70151	-11.4558	139.522	1	2.15212e-08	0.945362	0.0546379
	3	61	1	11.1588	0.644629	-0.19069	133.423	2.12523	44.2222	-6.82266	190.103	0.000948157	0.999052	0.992017	0.00798254
	3	61	2	20.3447	1.167	0.0670713	195.129	2.29032	126.984	-12.339	120.742	0.00308998	0.99691	0.0084734	0.991527
	3	61	3	22.6732	0.633515	-0.198243	181.699	2.25935	142.299	-4.80605	78.2362	0.000261673	0.999738	0.000199012	0.999801
	3	61	4	24.0347	1.35039	0.130458	134.096	2.12742	51.7451	-14.6711	199.78	0.0204883	0.979512	0.988781	0.0112186
	3	61	5	53.3764	6.61856	0.820764	56.482	1.75191	12.0373	-18.7346	198.409	0.996826	0.00317437	0.996037	0.00396308
	3	62	1	26.0741	6.20733	0.792905	70.4768	1.84805	23.2502	-17.3336	201.135	0.994461	0.00553891	0.995401	0.00459863
	3	62	2	49.0974	0.539043	-0.268376	110.24	2.04234	50.2609	-15.5886	173.052	0.00104234	0.998958	0.962483	0.0375171
	3	63	1	6.48519	1.95056	0.290159	136.703	2.13578	34.2849	1.88645	110.862	0.10394	0.89606	0.848956	0.151044
	3	63	2	22.3175	0.627958	-0.20207	251.398	2.40036	134.318	-7.44881	140.354	6.54192e-05	0.999935	0.00789075	0.992109
	3	63	3	34.1153	25.8796	1.41296	52.0911	1.71676	8.02004	-7.90267	245.733	0.999999	8.16986e-07	0.999944	5.56813e-05
	70	64	1	3.27324	22.5125	1.35242	75.0053	1.87509	17.0721	-18.0229	148.05	0.999998	1.78837e-06	0.982808	0.0171924
	70	64	2	25.9358	1.66718	0.221983	77.1337	1.88724	27.7248	-22.7824	254.325	0.198103	0.801897	0.999835	0.000164646
	70	64	3	27.9364	32.0544	1.50589	42.6574	1.62999	10.0435	-33.1011	295.633	1	2.27709e-07	0.999997	2.63992e-06
	70	65	1	1.21704	58.7738	1.76918	47.9749	1.68101	9.4103	-15.4162	163.951	1	2.57519e-09	0.980911	0.0190893
	70	66	1	0.45014	59.5407	1.77481	57.7521	1.76157	7.84328	-11.9638	196.978	1	1.75512e-09	0.994497	0.0055025
	20	67	1	4.09562	55.8994	1.74741	43.4163	1.63765	8.58888	-10.8854	293.527	1	4.38312e-09	0.999999	7.39871e-07
	20	68	1	2.15062	57.8444	1.76226	39.7401	1.59923	3.49935	-25.9976	239.201	1	3.94089e-09	0.999785	0.000215423
	20	69	1	0	59.995	1.77811	47.7862	1.6793	7.39839	2.0414	62.7772	1	2.21936e-09	0.78628	0.21372
	20	70	1	6.55188	53.4431	1.72789	42.7868	1.63131	3.94761	-29.3569	275.847	1	6.23605e-09	0.999981	1.85664e-05
	0	71	1	13.3541	0.733561	-0.134564	231.553	2.36465	193.719	-2.11225	96.1895	0.00018505	0.999815	2.90562e-07	1
	0	71	2	56.3953	0.483483	-0.315619	242.944	2.38551	216.015	-0.536894	46.1207	2.47035e-05	0.999975	5.94215e-10	1
	3	72	1	43.2791	16.7159	1.22313	65.8802	1.81876	14.2778	-7.43991	179.687	0.999986	1.36535e-05	0.989326	0.010674
	3	73	1	10.6586	7.25208	0.860463	49.9261	1.69833	15.1196	-9.72209	219.474	0.998226	0.00177435	0.999095	0.000905056
	3	73	2	43.0346	16.9604	1.22944	55.7812	1.74649	7.21595	-32.3429	282.858	0.999987	1.26618e-05	0.999994	6.41602e-06
	3	74	1	10.1696	1.02807	0.0120237	163.788	2.21428	85.9841	-4.64278	206.828	0.00312542	0.996875	0.993699	0.00630082
	3	74	2	12.5314	1.76162	0.245911	110.699	2.04414	43.5129	-7.91269	71.7696	0.110591	0.889409	0.610502	0.389498
	3	74	3	35.6102	24.3848	1.38712	49.5314	1.69488	15.8741	-33.3148	220.371	0.999999	1.25592e-06	0.999969	3.13841e-05
	3	75	1	22.9455	37.0495	1.56878	46.6769	1.6691	9.23193	-14.2389	211.639	1	7.64152e-08	0.997469	0.00253139
	3	76	1	15.0324	1.47268	0.168108	116.696	2.06706	52.4072	-0.708453	170.557	0.0448911	0.955109	0.989028	0.0109716
	3	76	2	39.0177	20.9732	1.32166	50.5627	1.70383	11.2545	-38.8188	287.819	0.999997	3.3357e-06	0.999999	5.85962e-07
	3	77	1	10.431	0.144489	-0.840164	206.246	2.31439	164.493	-4.44553	142.032	9.2682e-07	0.999999	0.000331749	0.999668
	3	77	2	13.8876	0.166718	-0.778017	274.061	2.43785	222.016	-8.22706	95.2151	2.77011e-07	1	1.59274e-09	1
	3	77	3	23.3684	1.1448	0.0587294	146.949	2.16717	27.1487	-12.5078	271.46	0.00730713	0.992693	0.999987	1.34554e-05
	3	77	4	28.3088	1.03921	0.0167038	145.208	2.16199	58.3256	-19.1948	194.098	0.00494725	0.995053	0.985327	0.0146728
	3	77	5	38.1952	1.2226	0.0872848	132.568	2.12244	51.2037	-24.1177	175.943	0.0136102	0.98639	0.994001	0.0059992
	3	78	1	12.0982	1.34486	0.128678	175.343	2.24389	52.5442	-20.9722	281.495	0.00875133	0.991249	0.99997	3.02173e-05
	3	78	2	14.8824	0.666873	-0.175957	144.118	2.15872	93.0849	-9.64452	99.4072	0.000803555	0.999196	0.086253	0.913747
	3	78	3	17.0442	0.761347	-0.118417	133.418	2.12521	71.3255	-11.9785	135.375	0.00181255	0.998187	0.609498	0.390502
	3	78	4	27.1195	7.72462	0.887877	62.0133	1.79248	17.1387	-32.8247	272.101	0.998538	0.00146152	0.999991	9.31584e-06
	3	78	5	45.3418	2.49522	0.397108	122.051	2.08654	30.998	-41.3355	265.918	0.350527	0.649473	1	3.8426e-07
	30	79	1	16.4551	43.5413	1.6389	49.4571	1.69423	10.8598	-5.46562	145.566	1	2.2601e-08	0.948343	0.0516567
	30	80	1	1.13368	58.8627	1.76984	41.6241	1.61935	5.03301	-11.9005	202.205	1	3.20798e-09	0.995967	0.00403328
	30	81	1	10.3532	49.6432	1.69586	37.295	1.57165	2.33611	-9.99217	190.594	1	1.31206e-08	0.992919	0.00708077
	5	82	1	30.6477	29.3417	1.46749	40.0723	1.60284	9.23362	-1.2439	149.283	1	4.36883e-07	0.975999	0.0240011
	5	83	1	8.62469	13.6706	1.13579	47.5613	1.67725	11.7668	0.0727471	220.044	0.999951	4.86138e-05	0.999961	3.89837e-05
	5	83	2	32.2481	27.7413	1.44313	45.9662	1.66244	14.3517	-26.4048	180.067	0.999999	5.61838e-07	0.999179	0.000820713
	5	84	1	50.2533	9.73612	0.988386	30.8999	1.48996	8.61454	-22.1256	204.737	0.999682	0.000318003	0.998251	0.00174884
	5	85	1	13.9596	5.49046	0.739609	30.6663	1.48666	14.4179	-27.5727	251.11	0.994967	0.00503337	0.999909	9.10009e-05
	5	85	2	20.1613	2.61186	0.41695	143.093	2.15562	56.6924	-4.45047	117.212	0.320037	0.679963	0.596044	0.403956
	5	85	3	37.633	22.3564	1.3494	41.731	1.62046	6.63717	-9.89539	166.234	0.999998	2.45845e-06	0.975419	0.0245813
	50	86	1	12.7648	47.2246	1.67417	46.0191	1.66294	3.40243	-18.8987	236.095	1	1.37909e-08	0.99941	0.000590137
	50	87	1	0	1.58379	0.199697	107.148	2.02998	39.3029	-10.2077	200.72	0.0767933	0.923207	0.943798	0.0562024
	50	87	2	1.77273	58.2167	1.76505	57.3312	1.75839	1.06703	-24.2951	271.598	1	2.11065e-09	0.999952	4.83541e-05
	50	88	1	0	0.672415	-0.172363	145.65	2.16331	100.939	6.97145	17.7615	0.000797026	0.999203	0.29954	0.70046
	50	88	2	1.31149	58.6779	1.76847	52.0195	1.71617	10.7971	-3.52154	252.479	1	2.29842e-09	0.999995	4.91786e-06
	50	89	1	22.0174	37.972	1.57946	33.9858	1.5313	7.48252	-17.9674	258.759	1	9.50063e-08	0.999885	0.000115315
	70	90	1	1.68941	3.62335	0.55911	104.587	2.01948	44.085	-22.1078	212.549	0.842239	0.157761	0.997525	0.00247537
	70	90	2	7.91912	52.0773	1.71665	46.2338	1.66496	4.94684	-28.7455	296.084	1	6.70518e-09	0.999994	5.77206e-06
	70	91	1	0.327879	18.7614	1.27326	116.748	2.06725	34.175	-20.6598	211.742	0.999994	6.3808e-06	0.997572	0.00242832
	70	91	2	19.3838	40.6126	1.60866	38.3841	1.58415	1.63209	-23.5054	287.844	1	5.12013e-08	0.999985	1.5082e-05
	70	92	1	6.00186	53.9945	1.73235	38.3436	1.58369	3.98936	-20.3978	212.615	1	6.89094e-09	0.998259	0.00174093
	70	93	1	3.64002	9.20841	0.964185	102.328	2.00999	21.8478	-20.6128	201.078	0.999242	0.000758167	0.996988	0.00301161
	70	93	2	13.2208	46.7756	1.67002	47.3888	1.67568	4.34564	-38.2251	325.652	1	1.42031e-08	1	1.26775e-07
	10	94	1	0	59.995	1.77811	56.5014	1.75206	4.67402	-11.4996	252.491	1	1.71001e-09	0.821423	0.178577
	10	95	1	0	0.650186	-0.186962	165.967	2.22002	103.583	9.18728	18.8341	0.00041829	0.999582	0.263917	0.736083
	10	95	2	24.1847	35.8103	1.55401	47.5817	1.67744	8.13983	-14.0335	192.728	1	9.49616e-08	0.992884	0.0071162
	10	96	1	0.411229	1.96167	0.292627	101.775	2.00764	23.411	-16.5042	231.588	0.203734	0.796266	0.999201	0.000798806
	10	96	2	4.26789	5.16259	0.712868	137.335	2.13778	58.3371	-24.8963	243.162	0.961723	0.0382765	0.999438	0.000562178
	10	96	3	13.904	46.091	1.66362	48.675	1.68731	5.23748	-16.9886	234.181	1	1.52582e-08	0.999338	0.000661965
	10	97	1	14.2041	45.7909	1.66078	36.3851	1.56092	3.60021	-19.0573	255.185	1	2.40236e-08	0.999835	0.000164835
	100	98	1	0	59.9908	1.77808	48.2808	1.68377	9.45764	-3.22267	100.069	1	2.18416e-09	0.770886	0.229114
	100	99	1	0	59.9908	1.77808	55.969	1.74795	10.0477	0.904776	178.647	1	1.73553e-09	0.768029	0.231971
	100	100	1	3.55666	56.4342	1.75154	50.5507	1.70373	3.84102	-2.20445	186.632	1	3.22565e-09	0.997764	0.00223637
	100	101	1	6.16302	53.8278	1.73101	48.6401	1.68699	10.0696	-18.4155	202.112	1	4.8699e-09	0.996499	0.00350122
	400	102	1	0.172272	59.8227	1.77687	64.4363	1.80913	14.8401	-18.5946	155.44	1	1.44269e-09	0.986941	0.0130592
	400	103	1	0.200057	59.7949	1.77666	58.3538	1.76607	10.0313	-14.9311	177.553	1	1.67223e-09	0.986865	0.013135
	400	104	1	1.95056	58.0444	1.76376	60.0829	1.77875	11.7149	-29.1057	222.656	1	2.01776e-09	0.999842	0.000158176
	400	105	1	1.69493	58.3	1.76567	75.7833	1.87957	3.86015	-20.7475	188.775	1	1.41978e-09	0.996333	0.00366739
	400	106	1	1.47824	58.5181	1.76729	64.6612	1.81064	23.7079	-15.317	177.49	1	1.70693e-09	0.984877	0.0151228
	400	107	1	0	59.9964	1.77813	51.9556	1.71563	2.00704	-7.87274	71.551	1	1.94396e-09	0.875563	0.124437
	400	108	1	1.20593	58.7904	1.76931	55.441	1.74383	2.65437	-13.5876	227.109	1	2.0568e-09	0.999098	0.000902298
	400	109	1	2.45076	57.5456	1.76001	58.359	1.76611	18.0733	0.723122	162.865	1	2.2492e-09	0.993771	0.00622931
	20	110	1	12.3924	47.6025	1.67763	36.4548	1.56176	11.9012	-29.7957	282.997	1	1.8265e-08	0.999989	1.08662e-05
	20	111	1	0	0.500143	-0.300905	79.9561	1.90285	53.4816	-2.05307	21.9815	0.00282932	0.997171	0.917304	0.082696
	20	111	2	1.03919	58.9558	1.77053	42.7822	1.63126	10.1788	-19.1373	175.732	1	3.02926e-09	0.992558	0.007442
	20	112	1	25.5629	34.4321	1.53696	35.2867	1.54761	11.0145	-7.51635	157.92	1	1.73907e-07	0.966181	0.033819
	20	113	1	5.29041	54.7046	1.73802	39.2549	1.59389	8.68532	-26.2362	278.664	1	6.03552e-09	0.999976	2.3856e-05
	10	114	1	17.3165	42.6799	1.63022	36.0047	1.55636	6.10369	-8.25696	223.391	1	3.97033e-08	0.999501	0.00049852
	10	115	1	0	0.24452	-0.611685	185.574	2.26852	164.459	1.84777	34.4423	7.54658e-06	0.999992	0.000375717	0.999624
	10	115	2	14.649	1.55604	0.19202	102.862	2.01226	25.3918	-14.5059	168.091	0.0791461	0.920854	0.976225	0.0237753
	10	115	3	23.1905	36.8059	1.56592	43.4364	1.63785	10.3511	-12.7287	172.53	1	8.67622e-08	0.981529	0.0184711
	10	116	1	0	0.961409	-0.0170917	144.953	2.16123	46.69	8.31314	9.70095	0.00354853	0.996451	0.953871	0.0461294
	10	116	2	19.2226	40.7738	1.61038	34.5332	1.53824	4.71155	-24.7016	197.425	1	5.75296e-08	0.998917	0.00108253
	10	117	1	1.19481	1.12813	0.0523582	172.915	2.23783	82.5393	-12.6231	106.755	0.00397401	0.996026	0.29368	0.70632
	10	117	2	19.7228	0.705774	-0.151334	205.64	2.31311	119.585	-13.6816	153.364	0.000251272	0.999749	0.0696422	0.930358
	10	117	3	34.344	25.6524	1.40913	41.8809	1.62202	12.0195	-20.9951	202.863	0.999999	1.01356e-06	0.997635	0.00236525
	0	118	1	0	3.28427	0.516439	201.647	2.30459	108.304	1.273	108.405	0.43325	0.56675	0.207641	0.792359
	0	118	2	4.11229	0.111143	-0.954118	199.825	2.30065	179.671	-11.6276	111.917	5.74834e-07	0.999999	5.70132e-06	0.999994
	0	118	3	4.94031	0.1167	-0.932929	232.855	2.36709	199.377	12.3047	78.1906	2.59719e-07	1	1.76814e-06	0.999998
	0	118	4	19.4167	1.03363	0.014365	173.219	2.2386	81.2017	-5.31919	127.353	0.00263652	0.997363	0.339038	0.660962
	0	118	5	36.2159	0.744658	-0.128043	216.864	2.33619	118.529	-20.4702	171.791	0.000257568	0.999742	0.315551	0.684449
	0	118	6	38.0665	1.32816	0.12325	154.346	2.1885	105.094	3.0212	57.8544	0.0123421	0.987658	0.00781304	0.992187
	0	118	7	42.7956	1.0892	0.0371081	196.841	2.29412	77.7261	-2.4746	108.267	0.00215225	0.997848	0.24787	0.75213
	0	118	8	50.2477	0.3501	-0.455807	165.798	2.21958	74.9457	-3.19282	166.023	4.19987e-05	0.999958	0.920736	0.0792639
	0	119	1	28.4193	0.577943	-0.238115	171.387	2.23398	117.809	-6.25071	107.069	0.000229235	0.999771	0.00905322	0.990947
	50	120	1	14.8101	45.1807	1.65495	32.6089	1.51334	7.38741	-12.5327	237.414	1	3.10988e-08	0.999652	0.000347925
	50	121	1	20.2618	39.729	1.59911	36.5739	1.56317	8.6938	-14.2912	125.724	1	6.34823e-08	0.956271	0.0437287
	50	122	1	21.9346	38.0562	1.58043	39.5816	1.59749	7.06371	-7.5459	223.289	1	7.69829e-08	0.999579	0.000421333
	50	123	1	17.3832	42.6077	1.62949	32.3355	1.50968	7.42336	-14.957	129.654	1	4.69279e-08	0.963907	0.0360926
	30	124	1	0.4668	16.1102	1.2071	73.1825	1.86441	0.201331	-24.6829	258.002	0.999983	1.73962e-05	0.999891	0.000108849
	30	124	2	16.8159	6.63524	0.821856	100.519	2.00225	20.7188	-28.377	266.654	0.994393	0.00560687	0.999964	3.63337e-05
	30	124	3	24.0902	35.9047	1.55515	48.3066	1.68401	9.96384	-25.3016	276.913	1	9.17486e-08	0.999971	2.89115e-05
	30	125	1	46.0021	13.9929	1.14591	41.5266	1.61833	14.1271	-1.88769	120.397	0.999957	4.2874e-05	0.889199	0.110801
	30	126	1	1.12254	0.989172	-0.00472799	125.081	2.09719	56.7786	-24.1141	213.97	0.00660239	0.993398	0.997441	0.00255903
	30	126	2	5.55159	54.4434	1.73595	45.1047	1.65422	8.7835	-15.6388	281.986	1	5.01629e-09	0.99999	1.03519e-05
	30	127	1	3.13423	0.822458	-0.0848863	76.2188	1.88206	35.3355	-25.7992	182.126	0.0164959	0.983504	0.998325	0.0016755
	30	127	2	5.16259	54.8324	1.73904	47.4824	1.67653	0.068411	-29.5278	214.443	1	4.39945e-09	0.999848	0.000152363
	3	128	1	1.9117	0.739118	-0.131286	204.973	2.3117	152.952	0.408512	47.5402	0.000311706	0.999688	1.84825e-05	0.999982
	3	128	2	5.03489	1.1448	0.0587294	193.676	2.28708	110.454	-7.36772	92.4077	0.00289027	0.99711	0.0124226	0.987577
	3	129	1	2.10065	0.644644	-0.19068	171.257	2.23365	103.077	-1.48077	128.179	0.000356562	0.999643	0.138064	0.861936
	3	129	2	3.41217	0.872493	-0.0592382	135.232	2.13108	56.0814	-12.9695	166.534	0.00300131	0.996999	0.925946	0.0740535
	3	129	3	5.17383	1.05033	0.021324	168.873	2.22756	85.9941	2.09394	125.5	0.00309876	0.996901	0.52011	0.47989
	3	129	4	11.8037	1.31152	0.117774	120.012	2.07923	58.8979	-2.19057	158.965	0.0250405	0.97496	0.950034	0.0499661
	3	129	5	16.3162	1.68941	0.227736	108.671	2.03611	24.9942	-0.132208	139.278	0.0971074	0.902893	0.958447	0.0415535
	3	129	6	19.0281	1.53381	0.185771	114.438	2.05857	26.6606	-8.42959	114.688	0.0564446	0.943555	0.832265	0.167735
	3	129	7	39.2733	1.47268	0.168108	98.4607	1.99326	42.2491	-15.1198	113.986	0.070673	0.929327	0.902319	0.0976814
	3	129	8	41.0738	2.93424	0.467496	139.918	2.14587	63.5892	-4.21224	89.0503	0.482503	0.517497	0.290445	0.709555
	3	129	9	49.0041	10.9867	1.04087	57.1224	1.75681	13.1644	-13.0806	191.5	0.999817	0.000182807	0.992202	0.00779771
	3	130	1	54.089	1.36153	0.134028	117.138	2.0687	44.1658	-8.71718	139.27	0.0316047	0.968395	0.852606	0.147394
	3	130	2	56.1063	1.16703	0.0670815	125.124	2.09734	55.6942	-4.62998	169.266	0.013304	0.986696	0.964771	0.0352293
	3	130	3	58.7238	1.17814	0.071198	127.025	2.10389	43.3059	-13.0655	146.948	0.0132221	0.986778	0.911602	0.0883982
	5	131	1	57.9333	2.05614	0.313054	61.0721	1.78584	32.6457	-18.4004	146.173	0.507244	0.492756	0.976199	0.0238011
	5	132	1	0.122257	0.594615	-0.225764	191.624	2.28245	125.815	-14.0139	133.365	0.000162128	0.999838	0.0101483	0.989852
	5	132	2	14.0985	1.69493	0.229152	121.915	2.08606	42.7527	-14.104	208.689	0.073909	0.926091	0.995211	0.00478859
	5	132	3	17.7273	1.48932	0.172987	125.695	2.09932	55.6057	-21.8336	167.152	0.0383673	0.961633	0.982821	0.0171793
	5	132	4	20.178	1.0892	0.0371081	162.328	2.21039	52.8397	-11.3572	136.828	0.00418775	0.995812	0.80884	0.19116
	5	132	5	23.1066	0.883587	-0.0537509	166.829	2.22227	53.6371	2.20929	132.072	0.00149355	0.998506	0.91378	0.0862202
	5	132	6	25.7518	1.77273	0.248643	115.097	2.06106	41.8217	-17.2697	211.15	0.103484	0.896516	0.99595	0.00405011
	5	132	7	27.9358	2.09505	0.321193	121.82	2.08572	33.0946	-17.0518	156.276	0.182875	0.817125	0.972203	0.0277966
	5	132	8	32.8038	27.1856	1.43434	48.3781	1.68465	10.295	-5.54045	245.748	0.999999	6.18151e-07	0.999976	2.43369e-05
	5	133	1	3.7344	4.89585	0.689828	225.706	2.35354	44.4716	-3.14698	213.997	0.879033	0.120967	0.999647	0.000352865
	5	133	2	9.79725	1.2059	0.0813117	189.658	2.27797	32.7636	-34.6019	214.974	0.0039886	0.996011	0.999975	2.49413e-05
	5	133	3	13.6761	0.533486	-0.272877	183.711	2.26413	143.923	-8.89693	113.691	0.000125001	0.999875	0.000680429	0.99932
	5	133	4	27.4468	32.5427	1.51245	40.1407	1.60359	12.1907	-9.77076	214.067	1	2.19032e-07	0.998609	0.0013906
	100	134	1	0	0.822477	-0.0848761	93.8856	1.9726	60.7726	-9.4197	171.634	0.00834501	0.991655	0.886781	0.113219
	100	134	2	4.92375	55.0726	1.74094	49.197	1.69194	9.90113	-22.6062	250.049	1	4.03661e-09	0.999799	0.000201256
	100	135	1	0.555728	0.800248	-0.0967754	147.053	2.16747	60.3987	-16.322	226.754	0.00155334	0.998447	0.997287	0.00271295
	100	135	2	2.55635	57.44	1.75921	48.0473	1.68167	1.53154	-22.272	270.455	1	3.05287e-09	0.999943	5.68228e-05
	100	136	1	0.30565	1.01142	0.00493355	145.371	2.16248	60.7445	-23.6727	175.212	0.00437753	0.995622	0.988902	0.0110981
	100	136	2	1.69497	58.3014	1.76568	49.2845	1.69271	2.57275	-23.1987	273.733	1	2.62336e-09	0.999957	4.33222e-05
	100	137	1	0.81692	0.944737	-0.0246889	203.287	2.30811	34.3778	-29.9942	192.743	0.000979505	0.99902	0.99973	0.000270322
	100	137	2	4.05126	55.9451	1.74776	59.3775	1.77362	11.3926	-18.0237	283.735	1	2.72754e-09	0.999987	1.28306e-05
	70	138	1	2.32845	1.30593	0.11592	126.737	2.1029	64.1931	-26.4267	196.126	0.0208992	0.979101	0.996461	0.00353947
	70	138	2	8.11899	51.876	1.71497	46.3628	1.66617	7.62674	-29.2937	273.606	1	6.87074e-09	0.999979	2.07109e-05
	70	139	1	8.36351	51.6315	1.71291	47.3163	1.67501	9.70497	-16.6926	237.793	1	6.90547e-09	0.999497	0.000503088
	70	140	1	10.5086	49.4864	1.69449	42.4473	1.62785	11.1458	-26.0349	278.732	1	1.10316e-08	0.999976	2.38621e-05
	70	141	1	8.48577	51.5092	1.71188	35.1643	1.5461	3.85862	-4.20099	95.8672	1	1.11018e-08	0.806549	0.193451
	3	142	1	27.4863	0.711332	-0.147928	195.418	2.29097	158.013	-5.55847	118.438	0.000318628	0.999681	0.000146242	0.999854
	3	142	2	33.5826	1.25039	0.0970447	189.043	2.27656	145.428	-12.5245	87.8604	0.00480641	0.995194	0.000461561	0.999538
	3	142	3	50.4934	1.06144	0.0258955	201.515	2.30431	108.903	-21.8536	184.87	0.00175125	0.998249	0.71274	0.28726
	3	142	4	53.7722	0.916951	-0.0376539	199.369	2.29966	138.174	-6.44611	146.855	0.00091662	0.999083	0.00852225	0.991478
	3	143	1	2.26737	0.961409	-0.0170917	179.99	2.25525	110.285	0.319521	70.6036	0.00165389	0.998346	0.00594273	0.994057
	3	143	2	7.35228	0.966966	-0.0145886	187.429	2.27284	133.996	-1.79515	108.534	0.00146744	0.998533	0.00224438	0.997756
	3	143	3	9.11394	1.54492	0.188907	123.626	2.09211	35.7818	0.983144	145.966	0.0472896	0.95271	0.973417	0.0265826
	3	143	4	13.3097	0.866935	-0.0620132	151.135	2.17937	109.589	-8.02795	66.2035	0.00196713	0.998033	0.00975205	0.990248
	3	143	5	15.1714	4.15684	0.618764	160.157	2.20455	66.3676	-3.57674	147.909	0.837645	0.162355	0.826896	0.173104
	3	143	6	19.7784	1.01698	0.00731325	154.997	2.19032	100.042	3.98228	64.539	0.0036014	0.996399	0.0177207	0.982279
	3	143	7	29.1924	0.711332	-0.147928	142.347	2.15335	43.2556	-23.7066	178.364	0.00108708	0.998913	0.995276	0.00472411
	3	143	8	31.1986	5.65731	0.75261	123.81	2.09275	51.7912	-21.7366	173.716	0.980921	0.0190792	0.987045	0.012955
	3	143	9	38.3397	3.15098	0.498445	121.827	2.08574	53.6684	-10.0963	98.1382	0.650062	0.349938	0.608526	0.391474
	3	143	10	41.9908	0.461254	-0.33606	150.445	2.17738	117.533	1.62455	85.777	0.000169197	0.999831	0.00619993	0.9938
	3	143	11	53.7	2.84533	0.454132	108.463	2.03528	24.5712	-15.7119	172.216	0.580788	0.419212	0.982161	0.0178389
	3	143	12	56.9121	3.08429	0.489155	71.7136	1.8556	17.611	-36.5799	267.127	0.823952	0.176048	0.999997	2.97634e-06
	3	144	1	17.5666	1.21704	0.0853063	172.167	2.23595	77.4094	4.13502	104.993	0.00575836	0.994242	0.457317	0.542683
	3	144	2	27.9087	0.81692	-0.0878205	211.115	2.32452	182.95	-2.26665	40.791	0.000434789	0.999565	1.81264e-07	1
	3	144	3	29.1535	0.800248	-0.0967754	195.011	2.29006	161.087	-2.69604	47.2395	0.000538146	0.999462	6.31172e-06	0.999994
	3	144	4	48.7262	11.2702	1.05193	77.8868	1.89146	18.0618	-6.76019	152.001	0.999823	0.00017659	0.954218	0.0457817
