# Supplementary material for: Accept–reject decision-making revealed via a quantitative and ethological study of C. elegans foraging
Source: eLife. 2025 Sep 10;13:RP103191. doi: 10.7554/eLife.103191 (PMC12422737; doi:10.7554/eLife.103191)
Supplement: Figure 3—source data 4. [file elife-103191-fig3-data4.xlsx]

## Sheet: Sheet1
Figure 3 - Source Data 4
Figure 3G - Encounter classification as explore or exploit and sense or no response
Summary Statistics
	label	OD600	growth time (hr)	# worms	# encounters
	0	0	1	30	262
	0.5	0.5	1	33	330
	1	1	1	27	285
	6	5	1	32	195
	10	10	1	38	197
	200	1	48	31	57
Source Data
	label	worm #	encounter #	encounter start (min)	encounter duration (min)	log10(duration)	mean velocity on patch (μm/s)	log10(velocity)	min. velocity on patch (μm/s)	Δ velocity (μm/s^2)	max. Δ velocity (μm/s^2)	p(exploit)	p(explore)	p(sense)	p(no response)		* posterior probability of classification as explore or exploit as estimated by the Gaussian Mixture Model described in methods, Figure 2H, and Figure 2 - supplement 6
	1	1	1	0.443944	0.245941	-0.609169	200.29	2.30166	155.426	-10.6539	84.5765	5.20928e-06	0.999995	7.83283e-05	0.999922		* posterior probability of classification as sense or no response as estimated by semi-supervised Quadratic Discriminant Analysis (QDA) described in methods, Figure 2I, Figure 2 - supplement 8, and Video 5
	1	1	2	2.51152	0.448113	-0.348613	195.567	2.2913	159.967	1.51185	40.7867	4.83287e-05	0.999952	5.80849e-06	0.999994		* RGB value calculation: p(exploit)*[0 114 178] + p(explore)*p(sense)*[0 158 115] + p(explore)*p(no response)*[230 159 0]
	1	1	3	3.27018	0.187582	-0.726809	203.802	2.30921	187.099	-2.33603	27.9857	2.06363e-06	0.999998	7.24854e-08	1
	1	1	4	6.19229	0.248025	-0.605504	170.545	2.23184	145.938	-7.3715	89.0425	1.20745e-05	0.999988	0.000202452	0.999798
	1	1	5	14.7273	0.256362	-0.591146	165.692	2.2193	146.787	-13.7669	108.065	1.54253e-05	0.999985	0.000724638	0.999275
	1	1	6	18.8666	0.239688	-0.620353	179.645	2.25442	153.976	-4.83606	73.5744	8.36534e-06	0.999992	3.75589e-05	0.999962
	1	1	7	19.94	0.162571	-0.788957	201.067	2.30334	163.507	-9.2643	69.0804	1.47559e-06	0.999999	1.484e-05	0.999985
	1	1	8	20.8216	8.02018	0.904184	40.7999	1.61066	8.31094	-12.6003	240.654	0.999068	0.000932318	0.999733	0.0002674
	1	1	9	31.3012	4.2602	0.62943	55.0216	1.74053	10.0664	-29.2211	246.89	0.971224	0.0287757	0.999928	7.18248e-05
	1	1	10	38.5252	21.4719	1.33187	44.8814	1.65207	8.28441	-33.8093	257.847	0.999997	3.04436e-06	0.999989	1.12235e-05
	10	2	1	1.98832	0.170904	-0.767248	188.563	2.27546	156.751	-7.44753	122.279	2.41486e-06	0.999998	0.000195422	0.999805
	10	2	2	5.83992	54.1578	1.73366	37.4265	1.57318	9.1624	-19.8981	206.059	1	7.01564e-09	0.997541	0.00245878
	0	3	1	0.987932	0.279289	-0.553946	201.375	2.304	130.619	3.4419	120.468	7.69845e-06	0.999992	0.0220193	0.977981
	0	3	2	2.92211	0.120886	-0.917623	202.145	2.30566	164.041	7.42878	40.5952	6.57794e-07	0.999999	6.12694e-06	0.999994
	0	3	3	6.37154	0.385585	-0.413879	181.7	2.25935	146.016	-3.42261	83.1927	3.85921e-05	0.999961	0.000143909	0.999856
	0	3	4	9.34784	0.248025	-0.605504	205.996	2.31386	188.049	0.258498	32.4921	4.63612e-06	0.999995	5.76025e-08	1
	0	3	5	11.1882	0.241772	-0.616593	218.983	2.34041	171.652	7.54027	13.6716	3.11102e-06	0.999997	6.87498e-07	0.999999
	0	3	6	13.8477	0.323058	-0.490719	194.74	2.28945	162.939	2.09012	34.9298	1.49169e-05	0.999985	3.24921e-06	0.999997
	0	3	7	15.9424	0.35849	-0.445523	184.9	2.26694	152.185	-1.57326	68.6174	2.74631e-05	0.999973	3.88148e-05	0.999961
	0	3	8	17.1783	0.345985	-0.460943	219.495	2.34142	153.267	-7.09243	84.6598	1.07202e-05	0.999989	6.63866e-05	0.999934
	0	3	9	30.5717	0.243857	-0.612865	198.462	2.29768	171.049	-5.1846	55.0198	5.31269e-06	0.999995	2.07266e-06	0.999998
	0	3	10	35.3467	0.260531	-0.584141	204.115	2.30987	168.927	-7.76685	70.0528	5.70746e-06	0.999994	5.3192e-06	0.999995
	0	3	11	45.5824	0.212593	-0.672451	231.924	2.36535	224.439	-0.278441	23.5408	1.51205e-06	0.999998	5.82351e-11	1
	0	3	12	54.7948	0.214677	-0.668214	218.896	2.34024	202.735	-0.811163	22.3333	2.12391e-06	0.999998	3.6886e-09	1
	0.5	4	1	0	0.320966	-0.493541	192.006	2.28331	108.787	14.8063	34.7769	1.56111e-05	0.999984	0.202415	0.797585
	0.5	4	2	4.36222	0.262609	-0.580691	173.627	2.23962	143.62	0.739267	116.81	1.31775e-05	0.999987	0.00196839	0.998032
	0.5	4	3	5.64192	0.248019	-0.605515	204.099	2.30984	148.614	-9.66392	182.458	4.86072e-06	0.999995	0.0243731	0.975627
	0.5	4	4	6.70694	0.250103	-0.60188	201.781	2.30488	167.954	-7.00641	65.9919	5.29486e-06	0.999995	5.12098e-06	0.999995
	0.5	4	5	10.3626	0.179241	-0.746563	215.332	2.33311	177.061	-6.63266	66.9624	1.33628e-06	0.999999	1.23925e-06	0.999999
	0.5	4	6	13.6494	0.252188	-0.598276	153.913	2.18727	129.926	-16.4788	118.311	2.11415e-05	0.999979	0.0125644	0.987436
	0.5	4	7	15.2834	0.235514	-0.627983	181.391	2.25862	146.533	-2.33814	67.3912	7.54548e-06	0.999992	7.81149e-05	0.999922
	0.5	4	8	16.4068	0.264693	-0.577258	180.854	2.25733	153.093	-5.57461	50.4488	1.10324e-05	0.999989	2.82201e-05	0.999972
	0.5	4	9	22.9053	0.348061	-0.458345	143.759	2.15763	84.5637	-7.33849	110.23	7.9239e-05	0.999921	0.166981	0.833019
	0.5	4	10	51.7777	0.206335	-0.685426	147.457	2.16867	89.7176	-5.71595	79.4675	1.48538e-05	0.999985	0.0520715	0.947928
	6	5	1	13.7456	0.266783	-0.573841	168.306	2.2261	107.029	-11.1672	113.864	1.61459e-05	0.999984	0.0441316	0.955868
	6	5	2	15.3234	3.64743	0.561987	35.7901	1.55376	13.0525	-14.3973	184.928	0.965997	0.0340026	0.989646	0.0103538
	6	5	3	21.7387	38.2584	1.58273	35.7882	1.55374	9.60045	-8.15846	209.355	1	8.43898e-08	0.998494	0.00150558
	10	6	1	9.7582	0.514796	-0.288365	75.2362	1.87643	23.8585	-12.4936	146.003	0.0038743	0.996126	0.944783	0.0552169
	10	6	2	22.4447	37.553	1.57465	25.8994	1.41329	7.65344	-26.9361	207.305	1	1.49578e-07	0.999554	0.000446208
	0	7	1	0.118802	0.212593	-0.672451	241.961	2.38375	209.371	0.912162	41.4433	1.20412e-06	0.999999	2.86786e-07	1
	0	7	2	9.28323	0.302216	-0.519683	201.133	2.30348	144.737	-4.63712	97.3266	1.01255e-05	0.99999	0.0002935	0.999707
	0	7	3	13.4121	0.223014	-0.651667	206.826	2.31561	183.583	-0.676995	32.26	3.23131e-06	0.999997	1.24448e-07	1
	0	7	4	21.1593	0.216761	-0.664018	209.257	2.32068	193.432	0.24993	32.3122	2.77939e-06	0.999997	2.28936e-08	1
	0	7	5	28.3895	0.195919	-0.707923	184.251	2.26541	170.099	-2.27342	69.0941	4.02318e-06	0.999996	3.10027e-06	0.999997
	0	7	6	55.3054	0.195919	-0.707923	242.862	2.38536	235.636	-0.0652616	16.8135	9.07139e-07	0.999999	4.98651e-12	1
	0.5	8	1	3.30762	0.473112	-0.325036	204.166	2.30998	159.95	-1.93146	65.0409	4.92701e-05	0.999951	1.17269e-05	0.999988
	0.5	8	2	6.15046	0.133389	-0.874882	219.936	2.3423	206.475	-3.43887	51.1335	5.16848e-07	0.999999	4.33465e-09	1
	0.5	8	3	7.60523	0.216756	-0.664028	210.57	2.3234	183.649	-4.52317	35.3027	2.68889e-06	0.999997	1.86471e-07	1
	0.5	8	4	18.441	0.19383	-0.712579	185.992	2.26949	171.323	-1.37573	21.8019	3.71044e-06	0.999996	8.0633e-07	0.999999
	0.5	8	5	21.7215	0.206335	-0.685426	203.492	2.30855	152.548	6.70267	11.6204	2.76775e-06	0.999997	1.00858e-05	0.99999
	0.5	8	6	29.6102	0.293872	-0.531842	160.778	2.20623	125.54	-3.94652	40.6934	2.73328e-05	0.999973	0.00072888	0.999271
	0.5	8	7	32.255	0.295956	-0.528773	182.205	2.26056	105.922	-13.6997	86.9181	1.52852e-05	0.999985	0.0551955	0.944805
	0.5	8	8	36.2963	0.239683	-0.620364	183.211	2.26295	170.541	1.67066	35.1969	7.56922e-06	0.999992	1.03503e-06	0.999999
	0.5	8	9	37.7844	0.293872	-0.531842	159.154	2.20182	121.635	-8.19429	84.683	2.86957e-05	0.999971	0.00356458	0.996435
	0.5	8	10	59.7393	0.256356	-0.591156	166.601	2.22168	149.942	3.58152	15.2338	1.5011e-05	0.999985	1.37934e-05	0.999986
	1	9	1	2.67409	0.22093	-0.655745	188.236	2.2747	154.985	-8.23065	88.586	5.13102e-06	0.999995	6.53202e-05	0.999935
	1	9	2	4.92924	0.237604	-0.624146	211.061	2.32441	178.806	-1.84946	73.5462	3.55859e-06	0.999996	1.0004e-06	0.999999
	1	9	3	6.86342	0.266783	-0.573841	170.157	2.23085	111.413	-12.9187	130.207	1.52983e-05	0.999985	0.058113	0.941887
	1	9	4	9.7897	0.181329	-0.741532	226.027	2.35416	196.292	-8.26153	54.5302	1.05926e-06	0.999999	5.08365e-08	1
	1	9	5	14.2396	0.218846	-0.659862	212.146	2.32663	197.423	-7.58075	56.0075	2.66422e-06	0.999997	3.80311e-08	1
	1	9	6	18.7603	0.464787	-0.332746	120.831	2.08218	32.1004	-8.81493	170.276	0.000436459	0.999564	0.972845	0.0271555
	1	9	7	31.3387	0.268868	-0.570461	173.509	2.23932	144.863	-9.77238	77.2529	1.42387e-05	0.999986	0.000244408	0.999756
	1	9	8	46.6537	13.3433	1.12526	49.2339	1.69226	14.1177	-14.1995	144.397	0.999944	5.61578e-05	0.961895	0.0381049
	6	10	1	9.71444	22.2821	1.34796	46.5034	1.66748	9.37899	-14.6435	244.871	0.999998	2.35263e-06	0.999749	0.0002509
	6	10	2	44.4621	0.116715	-0.932873	145.157	2.16184	104.273	-13.3893	146.353	4.14304e-06	0.999996	0.18323	0.81677
	6	10	3	46.365	13.6327	1.13458	46.1681	1.66434	11.7449	-18.9681	195.314	0.999951	4.94841e-05	0.995692	0.00430761
	6	11	1	6.0525	0.619006	-0.208305	84.1983	1.9253	36.1028	-19.1809	237.435	0.00454976	0.99545	0.99934	0.000660359
	6	11	2	9.71235	0.200083	-0.69879	235.219	2.37147	150.106	-9.90777	128.354	1.15457e-06	0.999999	0.000624485	0.999376
	6	11	3	13.0304	0.329303	-0.482404	153.587	2.18635	78.163	-9.86996	233.25	4.88704e-05	0.999951	0.998693	0.00130732
	6	11	4	21.9299	38.0658	1.58053	36.4017	1.56112	7.56559	-37.2151	262.389	1	8.54196e-08	0.999998	2.46146e-06
	10	12	1	1.46522	0.160487	-0.79456	249.834	2.39765	227.952	-7.7814	72.1253	4.18276e-07	1	1.99754e-10	1
	10	12	2	6.57163	53.4255	1.72775	34.15	1.53339	8.2325	-19.1685	199.94	1	9.0051e-09	0.996549	0.0034506
	0.5	13	1	26.5964	0.181325	-0.741542	210.757	2.32378	203.484	-0.632193	44.2121	1.55555e-06	0.999998	5.56614e-09	1
	0.5	13	2	31.9424	0.256356	-0.591156	192.349	2.28409	176.166	-5.78305	54.3597	7.31168e-06	0.999993	9.89601e-07	0.999999
	0.5	13	3	33.7827	0.279282	-0.553957	146.214	2.16499	102.969	-8.69927	110.574	3.68064e-05	0.999963	0.045492	0.954508
	0.5	13	4	42.3092	0.164651	-0.783434	263.386	2.42059	241.929	-7.70725	61.6787	3.3442e-07	1	8.32803e-12	1
	0.5	13	5	44.4663	0.262609	-0.580691	141.709	2.1514	108.602	-21.0854	182.246	3.56501e-05	0.999964	0.662709	0.337291
	1	14	1	4.73124	0.218846	-0.659862	217.569	2.3376	198.831	-3.09642	66.2938	2.33153e-06	0.999998	2.75817e-08	1
	1	14	2	5.50449	0.44186	-0.354715	243.054	2.3857	207.757	-8.47706	62.9906	1.70537e-05	0.999983	7.89116e-09	1
	1	14	3	7.50745	0.164655	-0.783424	230.112	2.36194	216.756	-0.951437	43.8652	7.19288e-07	0.999999	4.76091e-10	1
	1	14	4	12.5305	0.202172	-0.694279	216.662	2.33578	202.968	-3.37399	89.113	1.85962e-06	0.999998	3.76009e-08	1
	1	14	5	14.6251	0.183414	-0.736569	193.509	2.2867	147.047	7.26931	23.338	2.55914e-06	0.999997	3.18635e-05	0.999968
	1	14	6	17.9058	0.227183	-0.643625	203.696	2.30898	169.028	-5.37761	50.1625	3.70942e-06	0.999996	2.65267e-06	0.999997
	1	14	7	46.1035	0.546072	-0.26275	79.5546	1.90067	42.0577	-28.7101	227.41	0.00376178	0.996238	0.999721	0.000279213
	1	14	8	57.1938	0.193835	-0.712568	225.547	2.35324	203.759	-4.10324	45.1171	1.31376e-06	0.999999	6.37434e-09	1
	1	14	9	59.6532	0.3439	-0.463567	58.7392	1.76893	27.1721	-23.6301	189.697	0.00352611	0.996474	0.997637	0.00236324
	6	15	1	19.0224	0.293871	-0.531843	159.848	2.20371	131.097	-3.44145	78.6098	2.8103e-05	0.999972	0.000754363	0.999246
	6	15	2	40.498	19.4997	1.29003	38.8589	1.58949	12.9963	-12.5276	186.462	0.999994	6.01491e-06	0.989949	0.0100515
	0	16	1	0.756562	0.162567	-0.788967	277.509	2.44328	257.848	-2.68758	38.4574	2.3827e-07	1	8.34734e-14	1
	0	16	2	3.08252	0.158399	-0.800248	276.578	2.44182	259.433	-1.36119	32.4035	2.24103e-07	1	4.55523e-14	1
	0	16	3	6.12544	0.164651	-0.783435	237.607	2.37586	210.381	-3.1918	51.3011	6.00319e-07	0.999999	2.10486e-09	1
	0	16	4	29.806	0.195914	-0.707934	222.272	2.34689	188.456	4.47299	37.7416	1.47003e-06	0.999999	7.82826e-08	1
	0	16	5	52.2403	0.181325	-0.741543	175.433	2.24411	95.961	-24.3466	157.497	4.20245e-06	0.999996	0.883906	0.116094
	10	17	1	4.91255	0.523144	-0.281379	70.717	1.84952	43.1158	-24.1557	225.337	0.00510453	0.994895	0.999053	0.000947458
	10	17	2	7.8555	34.4254	1.53688	38.7513	1.58829	5.81189	-14.584	202.92	1	1.56044e-07	0.995815	0.00418467
	10	17	3	43.3835	16.6135	1.22046	39.5987	1.59768	5.81926	-19.283	180.289	0.999984	1.57266e-05	0.993751	0.00624918
	1	18	1	8.86824	0.216756	-0.664029	204.228	2.31012	151.327	-6.2888	72.8842	3.15938e-06	0.999997	5.87733e-05	0.999941
	1	18	2	14.8332	0.266777	-0.573852	154.713	2.18953	128.49	-5.50933	86.7413	2.4391e-05	0.999976	0.00138954	0.99861
	1	18	3	22.3571	0.239682	-0.620364	194.323	2.28852	158.784	-6.80985	68.5245	5.60273e-06	0.999994	2.00748e-05	0.99998
	1	18	4	28.4284	0.468943	-0.32888	118.652	2.07428	82.9262	-5.53882	93.9805	0.000484682	0.999515	0.114963	0.885037
	1	18	5	30.8169	0.379323	-0.420991	116.204	2.06522	80.8402	0.019285	74.4112	0.00026732	0.999733	0.0801977	0.919802
	1	18	6	32.4071	0.166735	-0.777972	198.557	2.29788	188.606	-2.97006	37.1463	1.69749e-06	0.999998	6.93336e-08	1
	1	18	7	37.4884	0.366818	-0.435549	134.902	2.13002	113.602	-8.79299	66.9758	0.000124943	0.999875	0.00745246	0.992548
	1	18	8	39.435	0.266777	-0.573852	154.457	2.18881	133.258	-2.61641	56.1009	2.45884e-05	0.999975	0.00031183	0.999688
	1	18	9	40.7272	0.481449	-0.31745	86.464	1.93684	38.8165	-11.6708	162.865	0.00186824	0.998132	0.951434	0.0485663
	1	18	10	44.8456	0.243851	-0.612876	160.282	2.20488	140.369	-5.73232	51.7244	1.56485e-05	0.999984	0.000163151	0.999837
	0.5	19	1	0	0.145897	-0.835954	213.962	2.33034	154.502	13.6944	23.9391	7.71497e-07	0.999999	0.00110916	0.998891
	0.5	19	2	2.30517	0.300131	-0.52269	128.54	2.10904	84.2397	-5.06685	53.3908	8.3752e-05	0.999916	0.057396	0.942604
	0.5	19	3	10.0169	0.539818	-0.267753	214.114	2.33064	151.872	-13.1468	174.994	6.80645e-05	0.999932	0.00733426	0.992666
	0.5	19	4	15.6297	0.193834	-0.712569	204.322	2.31032	178.649	0.972513	45.5174	2.24316e-06	0.999998	3.93833e-07	1
	0.5	19	5	18.4726	0.189666	-0.722011	221.997	2.34635	187.25	-2.23574	50.1897	1.33997e-06	0.999999	1.12668e-07	1
	0.5	19	6	19.2542	0.258446	-0.587631	182.434	2.26111	150.108	-2.94418	59.1429	9.79169e-06	0.99999	3.91328e-05	0.999961
	0.5	19	7	27.0409	0.170908	-0.767238	225.36	2.35288	209.022	3.53403	16.7352	9.02283e-07	0.999999	9.3915e-10	1
	0.5	19	8	33.3874	0.175076	-0.756773	253.91	2.40468	225.389	1.87266	30.1661	4.97676e-07	1	5.85216e-11	1
	0.5	19	9	34.267	0.225098	-0.647629	220.313	2.34304	198.693	-2.60714	37.6959	2.38809e-06	0.999998	1.18129e-08	1
	0.5	19	10	47.9959	0.295962	-0.528764	159.895	2.20383	117.187	2.71577	41.939	2.87014e-05	0.999971	0.00139186	0.998608
	0.5	19	11	49.8529	0.431438	-0.365082	100.456	2.00198	33.1351	-10.8581	147.501	0.000734415	0.999266	0.924774	0.0752261
	0.5	19	12	52.4395	0.316804	-0.499209	140.705	2.14831	71.3542	-2.34941	124.642	6.48893e-05	0.999935	0.526446	0.473554
	0.5	19	13	56.6476	0.587756	-0.230803	100.566	2.00245	36.0261	-4.54587	123.096	0.00199164	0.998008	0.81429	0.18571
	0.5	19	14	58.7547	0.281372	-0.550719	123.129	2.09036	90.462	-11.4152	121.498	8.48706e-05	0.999915	0.199278	0.800722
	200	20	1	0	31.6672	1.50061	71.4821	1.8542	1.60456	0.603366	79.9496	1	1.60308e-07	0.885716	0.114284
	200	20	2	33.4159	24.508	1.38931	59.7507	1.77634	14.8951	-16.7923	282.226	0.999999	1.0905e-06	0.999988	1.18438e-05
	10	21	1	1.00669	0.458533	-0.33863	85.0368	1.92961	43.6597	-21.4322	174.101	0.00172272	0.998277	0.990022	0.00997757
	10	21	2	6.80088	53.1961	1.72588	32.9394	1.51772	8.10595	-34.2621	244.617	1	9.86815e-09	0.999987	1.3233e-05
	6	22	1	0.648184	0.316797	-0.499218	208.207	2.31849	141.059	-5.0028	133.537	1.00773e-05	0.99999	0.00305723	0.996943
	6	22	2	3.30761	0.558564	-0.252927	91.3525	1.96072	33.0443	-12.5354	245.478	0.00241339	0.997587	0.999815	0.000184932
	6	22	3	10.1313	0.831593	-0.0800891	59.4235	1.77396	23.2288	-16.503	211.754	0.036847	0.963153	0.997235	0.00276529
	6	22	4	12.3843	0.727383	-0.138237	63.287	1.80131	21.0466	-13.5167	128.695	0.0200501	0.97995	0.937428	0.0625717
	6	22	5	18.9724	6.45891	0.81016	39.1413	1.59264	13.0572	-31.1645	226.964	0.997258	0.00274222	0.999931	6.86369e-05
	6	22	6	30.894	29.1037	1.46395	48.1698	1.68277	8.97524	-17.7236	255.695	1	3.91513e-07	0.999857	0.000142581
	1	23	1	11.1213	0.225093	-0.647638	191.506	2.28218	180.398	0.285681	11.0525	4.96757e-06	0.999995	1.41846e-07	1
	1	23	2	13.5285	0.262608	-0.580691	146.242	2.16507	126.482	3.45224	27.8156	3.06035e-05	0.999969	0.000359718	0.99964
	1	23	3	18.27	0.248019	-0.605515	168.025	2.22537	153.849	1.24286	17.5608	1.30078e-05	0.999987	8.70804e-06	0.999991
	1	23	4	20.8002	0.852435	-0.0693387	167.135	2.22307	85.9789	5.60729	93.3824	0.00126871	0.998731	0.250858	0.749142
	1	23	5	36.761	0.19383	-0.712579	190.017	2.27879	173.607	2.61859	20.542	3.31009e-06	0.999997	4.51706e-07	1
	1	23	6	47.3841	0.293871	-0.531843	168.953	2.22777	155.134	3.65178	9.36518	2.15322e-05	0.999978	6.00635e-06	0.999994
	1	23	7	52.0923	0.433512	-0.362999	125.791	2.09965	48.7662	-2.60253	112.388	0.000292348	0.999708	0.662635	0.337365
	10	24	1	5.96509	0.158402	-0.800239	241.809	2.38347	205.241	-3.11151	52.9479	4.84679e-07	1	5.63002e-09	1
	10	24	2	8.45159	0.15215	-0.817729	212.993	2.32837	191.915	-8.20277	62.9476	8.885e-07	0.999999	1.23695e-07	1
	10	24	3	14.671	0.721147	-0.141976	67.3728	1.82848	24.7306	-16.2373	185.607	0.0159498	0.98405	0.989739	0.0102608
	10	24	4	16.3467	5.79002	0.76268	42.8493	1.63194	12.7846	-33.0772	235.319	0.994979	0.00502119	0.999973	2.69367e-05
	10	24	5	25.2485	0.464786	-0.332747	75.7079	1.87914	47.3935	-25.7521	216.88	0.00281368	0.997186	0.99891	0.0010896
	10	24	6	39.365	0.558576	-0.252917	84.2947	1.9258	41.1844	-18.0348	209.238	0.00325839	0.996742	0.995745	0.00425457
	10	24	7	48.6566	0.341815	-0.466208	174.634	2.24213	125.602	-9.84565	114.222	3.03981e-05	0.99997	0.00612021	0.99388
	10	24	8	50.0718	7.60539	0.881122	43.6545	1.64003	11.0502	-28.1994	232.738	0.998728	0.00127248	0.999842	0.000158195
	10	24	9	58.4212	0.456449	-0.340608	85.9778	1.93439	56.3423	-11.8288	84.73	0.0016276	0.998372	0.648346	0.351654
	0	25	1	5.13962	0.243851	-0.612876	193.79	2.28733	155.183	-7.8355	62.7492	6.0005e-06	0.999994	3.49797e-05	0.999965
	0	25	2	6.29218	0.189662	-0.722021	213.178	2.32874	178.627	-2.27037	63.5419	1.67073e-06	0.999998	6.91152e-07	0.999999
	0	25	3	14.1496	0.19383	-0.712579	186.737	2.27123	167.649	1.04443	52.2315	3.63224e-06	0.999996	2.68908e-06	0.999997
	0	25	4	16.9716	0.229261	-0.639669	170.112	2.23073	158.719	-0.720644	15.3743	9.65169e-06	0.99999	4.92194e-06	0.999995
	0	25	5	24.0829	0.237598	-0.624157	186.041	2.26961	169.443	1.89911	42.9112	6.81309e-06	0.999993	1.55785e-06	0.999998
	0	25	6	30.4396	0.302208	-0.519694	158.167	2.19912	144.223	4.2891	7.27126	3.23022e-05	0.999968	2.68608e-05	0.999973
	0	25	7	34.9832	0.225093	-0.647638	153.007	2.18471	129.991	-2.35438	45.4927	1.56631e-05	0.999984	0.000376934	0.999623
	0	25	8	36.7839	0.212588	-0.672462	199.521	2.29999	183.441	-0.972834	24.4386	3.365e-06	0.999997	1.12464e-07	1
	0	25	9	45.2833	0.220924	-0.655756	203.173	2.30787	191.167	1.72463	13.1464	3.4446e-06	0.999997	2.14943e-08	1
	200	26	1	0.614851	5.04178	0.702584	98.8704	1.99507	34.8486	-30.5266	211.432	0.973331	0.0266686	0.999823	0.000176563
	200	26	2	6.62371	50.9847	1.70744	96.1732	1.98305	0.411295	-21.4019	231.798	1	3.17911e-09	0.999355	0.000645179
	200	26	3	58.8339	1.16301	0.0655819	92.4745	1.96602	38.6684	-23.9221	207.955	0.0326599	0.96734	0.998242	0.00175834
	0.5	27	1	9.93743	0.289703	-0.538047	208.83	2.31979	151.561	1.91218	74.502	7.27459e-06	0.999993	7.11928e-05	0.999929
	0.5	27	2	11.3755	0.177156	-0.751643	223.506	2.34929	180.565	-8.06931	67.408	1.05089e-06	0.999999	8.63314e-07	0.999999
	0.5	27	3	14.6102	0.333471	-0.476942	238.01	2.3766	187.109	6.68279	42.0337	6.31383e-06	0.999994	1.65469e-07	1
	0.5	27	4	30.6626	0.212588	-0.672462	196.209	2.29272	177.517	-2.24736	47.6086	3.67504e-06	0.999996	5.09828e-07	0.999999
	0.5	27	5	37.2154	0.231345	-0.635739	187.102	2.27208	170.241	-1.5628	24.6852	6.09414e-06	0.999994	1.0052e-06	0.999999
	0.5	27	6	44.7664	0.227177	-0.643636	191.647	2.2825	172.402	-3.12315	38.0459	5.0911e-06	0.999995	1.00402e-06	0.999999
	0.5	27	7	45.7168	0.183409	-0.736579	223.387	2.34906	206.436	-4.39163	38.5604	1.16963e-06	0.999999	3.52563e-09	1
	0.5	27	8	50.2291	0.223009	-0.651678	197.988	2.29664	162.007	-0.925421	61.673	4.05985e-06	0.999996	7.91771e-06	0.999992
	6	28	1	8.94139	0.421016	-0.375701	206.641	2.31522	162.254	-4.19852	51.237	2.96904e-05	0.99997	6.51679e-06	0.999993
	6	28	2	14.8419	0.233435	-0.631834	164.202	2.21538	110.639	-11.4936	127.732	1.2181e-05	0.999988	0.0496351	0.950365
	6	28	3	16.7302	0.591924	-0.227734	179.222	2.25339	136.597	-5.69974	77.4409	0.000209848	0.99979	0.000415692	0.999584
	6	28	4	23.2143	26.4865	1.42302	45.3645	1.65672	8.34236	-6.57539	223.943	0.999999	7.72339e-07	0.999695	0.000304953
	6	28	5	51.8955	0.458533	-0.33863	102.535	2.01087	62.8236	-16.5928	168.2	0.000817076	0.999183	0.930713	0.0692868
	6	28	6	52.823	2.09049	0.320249	157.991	2.19863	35.3921	-10.4338	219.654	0.100856	0.899144	0.998777	0.00122258
	6	28	7	58.2712	0.256362	-0.591147	135.475	2.13186	83.3308	-19.8529	158.222	4.13477e-05	0.999959	0.839207	0.160793
	0.5	29	1	4.66443	0.212588	-0.672461	235.155	2.37135	183.676	-6.22307	65.3281	1.40376e-06	0.999999	3.9716e-07	1
	0.5	29	2	9.64149	0.373071	-0.428208	146.212	2.16498	97.1267	-9.14385	107.027	9.21616e-05	0.999908	0.0697799	0.93022
	0.5	29	3	14.258	0.189662	-0.72202	234.933	2.37094	216.612	-1.76638	30.4131	9.82685e-07	0.999999	3.44064e-10	1
	0.5	29	4	16.0066	0.483533	-0.315574	156.873	2.19555	74.9253	-9.39839	142.934	0.000167987	0.999832	0.588936	0.411064
	0.5	29	5	31.7694	0.535638	-0.271128	121.676	2.08521	38.4799	-3.07016	162.22	0.000690516	0.999309	0.975936	0.0240636
	0.5	29	6	58.1178	0.479365	-0.319334	104.624	2.01963	72.3782	-24.4361	162.152	0.000868371	0.999132	0.979598	0.0204021
	0	30	1	7.73046	0.594009	-0.226207	223.086	2.34847	126.093	-1.89873	105.517	8.52987e-05	0.999915	0.00445786	0.995542
	0	30	2	18.2288	0.20634	-0.685417	200.102	2.30125	156.073	-5.82599	57.7191	3.02622e-06	0.999997	2.13234e-05	0.999979
	0	30	3	46.1264	0.227182	-0.643625	183.89	2.26456	138.114	-8.32651	67.7172	6.30219e-06	0.999994	0.000395644	0.999604
	1	31	1	9.01623	0.181325	-0.741542	226.929	2.35589	193.399	-5.30086	79.1646	1.03615e-06	0.999999	1.17534e-07	1
	1	31	2	16.7861	0.210504	-0.67674	194.078	2.28798	175.624	0.113125	26.5937	3.77801e-06	0.999996	3.90729e-07	1
	1	31	3	21.8424	0.227177	-0.643635	171.763	2.23493	143.253	-5.64688	70.5913	8.94206e-06	0.999991	0.000152177	0.999848
	1	31	4	25.7127	0.468944	-0.328879	139.937	2.14593	24.448	-12.46	236.449	0.000243945	0.999756	0.999628	0.000372032
	1	31	5	27.3842	0.871194	-0.0598852	43.2401	1.63589	13.9595	-28.9736	213.474	0.101665	0.898335	0.999795	0.000205311
	1	31	6	32.3947	0.719048	-0.143242	51.9888	1.71591	24.2195	-15.1853	170.592	0.0358137	0.964186	0.98013	0.0198702
	1	31	7	39.8415	20.1542	1.30436	60.7044	1.78322	11.5401	0.10145	173.139	0.999996	4.0439e-06	0.996736	0.00326421
	6	32	1	8.58897	0.175072	-0.756782	218.239	2.33893	154.046	-19.9885	133.036	1.15779e-06	0.999999	0.00220525	0.997795
	6	32	2	9.85408	0.210504	-0.67674	210.716	2.3237	166.011	-19.2548	143.939	2.44525e-06	0.999998	0.000475881	0.999524
	6	32	3	10.9274	0.962898	-0.0164195	36.6866	1.56451	16.9716	-38.6059	275.515	0.191675	0.808325	0.999999	9.70892e-07
	6	32	4	31.7631	0.170904	-0.767248	195.683	2.29155	129.714	-18.3997	147.788	1.97102e-06	0.999998	0.0398312	0.960169
	6	32	5	41.9298	16.8903	1.22764	47.6271	1.67785	10.4825	-30.0584	239.865	0.999987	1.34407e-05	0.999928	7.15415e-05
	6	32	6	59.2412	0.756563	-0.121155	59.9708	1.77794	18.7759	-34.7037	241.395	0.0267977	0.973202	0.999987	1.26958e-05
	10	33	1	11.7114	6.04013	0.781047	39.8415	1.60034	10.6808	-28.7412	226.148	0.996141	0.00385914	0.999837	0.000162521
	10	33	2	24.7295	26.3719	1.42114	36.3905	1.56099	10.9135	-32.721	248.934	0.999999	9.54374e-07	0.999978	2.19627e-05
	10	33	3	51.3036	8.69546	0.939293	43.7292	1.64077	10.6263	-27.9387	325.079	0.999375	0.000624834	0.999999	5.54955e-07
	1	34	1	6.79255	0.181329	-0.741532	189.729	2.27813	156.812	4.28145	60.4564	2.75609e-06	0.999997	2.51419e-05	0.999975
	1	34	2	31.7493	0.243856	-0.612866	171.021	2.23305	158.74	-2.88057	30.8687	1.13074e-05	0.999989	7.10822e-06	0.999993
	1	34	3	39.5214	0.225098	-0.647628	184.562	2.26614	160.946	1.96138	47.419	6.01404e-06	0.999994	6.34743e-06	0.999994
	1	34	4	41.9516	0.218845	-0.659862	215.669	2.33379	201.912	0.429785	30.2636	2.44226e-06	0.999998	4.85392e-09	1
	1	34	5	53.465	0.254278	-0.594692	182.486	2.26123	165.185	0.627628	22.7939	9.28793e-06	0.999991	1.81494e-06	0.999998
	200	35	1	9.39577	50.6012	1.70416	79.8407	1.90222	0.0246617	-10.7841	186.091	1	4.11537e-09	0.990345	0.00965473
	0	36	1	13.7119	0.585659	-0.232355	239.55	2.3794	169.51	-1.08739	99.7767	5.92074e-05	0.999941	1.62447e-05	0.999984
	0	36	2	22.3447	0.220925	-0.655756	206.731	2.31541	171.793	-1.15145	54.2401	3.1448e-06	0.999997	1.45742e-06	0.999999
	0	36	3	39.9019	0.220925	-0.655756	229.213	2.36024	190.794	-7.37414	53.2257	1.82289e-06	0.999998	1.10537e-07	1
	0	36	4	40.8648	0.175072	-0.756782	256.385	2.40889	233.432	0.197542	29.4568	4.71209e-07	1	1.10072e-11	1
	0	36	5	45.5293	0.183409	-0.736579	219.589	2.34161	195.819	2.197	34.8065	1.28512e-06	0.999999	1.67982e-08	1
	6	37	1	2.33435	0.850371	-0.0703916	173.936	2.24039	76.2752	0.199921	199.896	0.00108343	0.998917	0.998712	0.00128769
	6	37	2	3.35355	0.560661	-0.251299	85.852	1.93375	42.6777	-16.4599	252.956	0.00308057	0.996919	0.999799	0.000201244
	6	37	3	4.44777	0.368911	-0.433078	88.972	1.94925	55.1481	-22.5876	172.002	0.000767813	0.999232	0.987638	0.0123616
	6	37	4	10.9048	0.262615	-0.580681	158.877	2.20106	136.414	-4.30559	64.0844	2.04225e-05	0.99998	0.000279667	0.99972
	6	37	5	21.4135	10.0294	1.00127	31.6208	1.49997	8.98961	-21.3918	167.572	0.999727	0.000273128	0.995197	0.00480328
	6	37	6	37.2621	0.225098	-0.647628	181.654	2.25925	162.571	-6.41404	52.8392	6.52729e-06	0.999993	8.41936e-06	0.999992
	6	37	7	42.6936	0.239688	-0.620354	176.392	2.24648	161.265	-6.05603	69.7092	9.17798e-06	0.999991	1.33588e-05	0.999987
	6	37	8	53.9631	0.295962	-0.528763	143.687	2.15742	129.485	-9.42333	84.2924	4.76914e-05	0.999952	0.00173279	0.998267
	10	38	1	2.38224	0.239683	-0.620364	192.014	2.28333	159.316	2.05621	25.6649	5.95648e-06	0.999994	4.41586e-06	0.999996
	10	38	2	10.6773	0.33764	-0.471546	114.694	2.05954	51.7858	-12.2189	165.463	0.000199009	0.999801	0.933073	0.0669265
	10	38	3	15.125	0.496039	-0.304485	207.659	2.31735	145.002	-15.3885	168.974	5.51581e-05	0.999945	0.0118885	0.988112
	10	38	4	18.4618	0.277198	-0.55721	162.117	2.20983	124.891	-11.9314	138.861	2.1854e-05	0.999978	0.0197916	0.980208
	10	38	5	21.8674	6.67568	0.824495	44.5348	1.6487	11.6051	-17.6182	246.732	0.997469	0.00253105	0.999725	0.000275163
	10	38	6	31.8819	0.212588	-0.672461	201.565	2.30441	165.527	-5.50404	83.9892	3.18891e-06	0.999997	1.07495e-05	0.999989
	10	38	7	35.5626	0.212588	-0.672461	185.804	2.26906	161.75	-3.18269	59.4229	4.89041e-06	0.999995	7.8516e-06	0.999992
	10	38	8	41.884	0.277198	-0.55721	158.736	2.20068	134.629	-9.64746	69.3049	2.42086e-05	0.999976	0.000799302	0.999201
	10	38	9	51.3546	0.264693	-0.577258	125.688	2.09929	110.513	-15.3304	145.137	6.48358e-05	0.999935	0.133509	0.866491
	10	38	10	59.2037	0.287619	-0.541182	153.163	2.18515	121.602	1.13999	80.7837	3.22394e-05	0.999968	0.00301654	0.996983
	200	39	1	0	10.273	1.0117	74.1966	1.87038	21.0715	3.13551	97.9483	0.999694	0.000306251	0.803722	0.196278
	200	39	2	10.7336	49.2327	1.69225	84.7512	1.92815	1.19821	-23.3817	226.56	1	4.79479e-09	0.999387	0.000612953
	10	40	1	1.534	0.241772	-0.616594	217.359	2.33718	146.53	4.21532	64.9341	3.23352e-06	0.999997	0.000120254	0.99988
	10	40	2	17.0616	0.316804	-0.499209	151.943	2.18168	129.664	-4.71487	55.3581	4.53708e-05	0.999955	0.000567429	0.999433
	10	40	3	22.9537	0.675294	-0.170507	79.566	1.90073	19.5511	-5.59612	180.56	0.00738428	0.992616	0.992042	0.0079582
	10	40	4	48.2543	0.208424	-0.681052	186.344	2.27032	160.248	6.04422	18.6147	4.54171e-06	0.999995	3.81727e-06	0.999996
	0.5	41	1	0.662773	0.122967	-0.91021	220.949	2.34429	208.28	-5.88036	46.7281	4.06441e-07	1	3.527e-09	1
	0.5	41	2	4.90202	0.208419	-0.681062	226.046	2.3542	203.494	6.61702	17.5857	1.62884e-06	0.999998	3.38035e-09	1
	0.5	41	3	7.21548	0.177156	-0.751643	245.774	2.39054	220.526	-1.58483	69.1094	6.19626e-07	0.999999	6.45877e-10	1
	0.5	41	4	8.17629	0.177156	-0.751643	233.645	2.36856	221.214	0.190122	37.0959	8.21641e-07	0.999999	1.61694e-10	1
	0.5	41	5	12.2426	0.16882	-0.772577	220.987	2.34437	192.995	-8.00006	66.1257	9.70816e-07	0.999999	1.06658e-07	1
	0.5	41	6	13.2242	0.225093	-0.647638	200.415	2.30193	154.908	10.6513	11.7687	3.92181e-06	0.999996	1.23477e-05	0.999988
	0.5	41	7	14.729	0.16882	-0.772577	217.083	2.33662	197.818	-6.16074	61.1403	1.0722e-06	0.999999	3.29225e-08	1
	0.5	41	8	17.0946	0.185493	-0.731672	223.423	2.34913	210.353	-3.20381	31.5925	1.20922e-06	0.999999	1.31169e-09	1
	0.5	41	9	21.2775	0.177156	-0.751643	213.546	2.32949	186.896	7.76021	26.2976	1.35158e-06	0.999999	9.95624e-08	1
	0.5	41	10	22.0258	0.164651	-0.783435	225.072	2.35232	215.83	-1.26953	19.357	8.14616e-07	0.999999	3.08699e-10	1
	0.5	41	11	23.0116	0.179241	-0.746564	211.517	2.32535	197.708	-5.03403	43.5603	1.47415e-06	0.999999	2.01626e-08	1
	0.5	41	12	24.6685	0.204251	-0.689836	204.293	2.31025	167.987	0.622281	87.77	2.62812e-06	0.999997	1.2781e-05	0.999987
	0.5	41	13	27.8427	0.137557	-0.861518	217.214	2.33689	190.935	-5.57729	64.637	6.0324e-07	0.999999	1.11092e-07	1
	0.5	41	14	36.1191	0.204251	-0.689836	222.65	2.34762	202.428	1.57707	45.4548	1.65796e-06	0.999998	7.54293e-09	1
	0.5	41	15	38.3096	0.206335	-0.685427	191.179	2.28144	129.465	0.371021	85.9627	3.85193e-06	0.999996	0.00149384	0.998506
	0.5	41	16	39.2016	0.143809	-0.842213	208.085	2.31824	167.937	1.26238	63.6648	8.69952e-07	0.999999	4.13047e-06	0.999996
	0.5	41	17	40.698	0.212588	-0.672462	215.54	2.33353	142.552	-3.98312	101.039	2.23576e-06	0.999998	0.000463716	0.999536
	0.5	41	18	45.9085	0.243851	-0.612876	200.84	2.30285	163.351	-4.05026	69.447	4.9977e-06	0.999995	8.61253e-06	0.999991
	0.5	41	19	47.5238	0.229261	-0.639669	193.183	2.28597	156.754	-5.34322	84.0467	5.0251e-06	0.999995	3.66873e-05	0.999963
	0.5	41	20	51.1669	0.264693	-0.577258	181.97	2.26	140.29	-12.1706	89.486	1.06995e-05	0.999989	0.000844556	0.999155
	0.5	41	21	53.8722	0.295955	-0.528774	138.145	2.14034	39.596	-8.58816	169.118	5.73868e-05	0.999943	0.965548	0.0344522
	0.5	41	22	56.3212	0.252187	-0.598277	153.396	2.18581	126.993	-3.88002	74.5552	2.14947e-05	0.999979	0.00108231	0.998918
	0	42	1	1.40478	0.110465	-0.956776	333.486	2.52308	321.812	2.89288	11.7229	2.46074e-08	1	3.26545e-21	1
	0	42	2	19.7857	0.170908	-0.767238	266.663	2.42596	250.875	3.572	7.42574	3.49962e-07	1	1.39824e-13	1
	0	42	3	28.4061	0.250109	-0.601871	229.889	2.36152	190.909	3.83833	44.516	2.70736e-06	0.999997	6.44614e-08	1
	0	42	4	35.0131	0.204256	-0.689826	246.954	2.39262	234.417	-3.53918	47.8884	9.46559e-07	0.999999	1.79662e-11	1
	1	43	1	7.69276	0.177156	-0.751643	263.627	2.42099	202.502	-5.77311	100.608	4.18028e-07	1	6.68878e-08	1
	1	43	2	12.4301	0.127136	-0.895732	258.87	2.41308	238.457	-1.97831	25.212	1.73314e-07	1	3.77187e-12	1
	1	43	3	15.7106	0.197998	-0.703338	220.853	2.3441	201.222	4.38895	29.834	1.57246e-06	0.999998	6.35573e-09	1
	1	43	4	19.8228	0.177156	-0.751643	238.49	2.37747	203.987	-5.83359	50.0111	7.32929e-07	0.999999	8.209e-09	1
	1	43	5	20.7002	0.179241	-0.746564	259.483	2.41411	246.051	-2.14818	23.7356	4.74164e-07	1	7.25998e-13	1
	1	43	6	24.4455	0.212588	-0.672462	219.359	2.34116	207.541	-1.63475	54.5619	2.03622e-06	0.999998	3.82508e-09	1
	1	43	7	30.8461	0.197998	-0.703338	223.46	2.3492	193.449	-7.30349	66.3411	1.4757e-06	0.999999	9.05059e-08	1
	1	43	8	36.8652	0.202167	-0.69429	239.919	2.38006	208.19	3.05987	57.5777	1.07163e-06	0.999999	5.53568e-09	1
	1	43	9	46.2545	0.231345	-0.635739	180.828	2.25727	134.073	-12.9296	130.904	7.25962e-06	0.999993	0.00584604	0.994154
	1	43	10	47.2278	0.150062	-0.82373	230.726	2.3631	221.079	-1.81976	34.7048	5.41919e-07	0.999999	1.61178e-10	1
	1	43	11	50.2749	0.220924	-0.655756	165.884	2.2198	142.284	-16.6333	117.56	9.84505e-06	0.99999	0.00296475	0.997035
	1	43	12	57.2799	0.195914	-0.707934	257.155	2.4102	240.975	0.599969	45.1107	6.62507e-07	0.999999	4.19871e-12	1
	10	44	1	0.360574	0.20634	-0.685417	226.37	2.35482	159.041	-0.608769	65.0484	1.5659e-06	0.999998	1.37447e-05	0.999986
	10	44	2	0.983761	0.198003	-0.703329	206.588	2.31511	177.643	-2.84993	26.9044	2.25339e-06	0.999998	3.65369e-07	1
	10	44	3	3.7558	0.17716	-0.751633	274.356	2.43831	217.842	7.80125	36.6806	3.33755e-07	1	7.16712e-10	1
	10	44	4	5.80669	0.27512	-0.560478	254.143	2.40508	230.295	-7.31354	66.793	2.24842e-06	0.999998	1.00791e-10	1
	10	44	5	13.3329	0.50647	-0.295446	108.331	2.03475	54.7333	-21.5591	225.019	0.000905126	0.999095	0.997928	0.00207203
	10	44	6	14.9419	8.52037	0.930459	41.7197	1.62034	9.81793	-27.1811	219.573	0.999316	0.000683965	0.999686	0.000313889
	10	44	7	24.2897	0.558576	-0.252917	140.137	2.14655	89.1214	-10.1211	130.266	0.000456298	0.999544	0.246133	0.753867
	10	44	8	35.5092	9.19567	0.963583	46.8906	1.67109	11.7603	-21.4617	241.098	0.999527	0.000473107	0.999627	0.000373164
	10	44	9	46.143	13.8539	1.14157	42.561	1.62901	11.3872	-17.4792	184.4	0.999955	4.53088e-05	0.992195	0.00780524
	0	45	1	7.93661	0.604416	-0.218664	243.419	2.38635	122.216	5.67386	117.226	6.34104e-05	0.999937	0.0779256	0.922074
	0	45	2	11.9883	0.183409	-0.736579	258.138	2.41185	214.328	6.48549	25.8629	5.24992e-07	0.999999	6.35465e-10	1
	0	45	3	17.1237	0.131304	-0.881721	269.648	2.4308	254.169	-1.56701	33.228	1.48809e-07	1	1.53156e-13	1
	0	45	4	24.2538	0.181325	-0.741543	228.745	2.35935	205.893	1.70109	20.8008	9.91538e-07	0.999999	1.81961e-09	1
	0	45	5	33.4555	0.185493	-0.731672	259.559	2.41424	239.474	-1.49792	41.6757	5.27801e-07	0.999999	4.80102e-12	1
	0	45	6	34.2162	0.162567	-0.788967	268.385	2.42876	249.015	-3.10228	35.6711	2.88734e-07	1	5.55028e-13	1
	0	45	7	45.0853	0.125052	-0.902911	287.554	2.45872	271.344	-5.81092	61.2736	8.78815e-08	1	1.03023e-14	1
	6	46	1	4.16431	0.170908	-0.767238	238.232	2.377	214.397	-2.61077	32.148	6.6131e-07	0.999999	5.82438e-10	1
	6	46	2	4.69371	0.270951	-0.567109	245.609	2.39025	200.454	-3.47925	52.8215	2.53808e-06	0.999997	1.33983e-08	1
	6	46	3	6.507	0.17716	-0.751633	241.993	2.3838	214.499	3.35337	23.3157	6.75731e-07	0.999999	4.0811e-10	1
	6	46	4	30.1777	0.131307	-0.881712	223.464	2.34921	211.008	-1.03325	22.1172	4.51662e-07	1	8.01892e-10	1
	6	46	5	31.9722	0.143813	-0.842203	225.329	2.35282	216.937	1.34746	9.23414	5.51031e-07	0.999999	1.74974e-10	1
	6	46	6	35.355	0.283457	-0.547513	172.13	2.23586	120.479	-4.13243	80.9905	1.75177e-05	0.999982	0.00269857	0.997301
	6	46	7	37.5893	0.254277	-0.594692	173.999	2.24055	132.652	-12.5608	102.035	1.17912e-05	0.999988	0.00287284	0.997127
	6	46	8	42.7457	0.421016	-0.375701	145.157	2.16184	92.9568	-2.32208	96.0015	0.000143268	0.999857	0.0598613	0.940139
	6	46	9	45.8512	0.164655	-0.783425	215.104	2.33265	197.998	-4.92104	51.4573	1.04999e-06	0.999999	2.22373e-08	1
	6	46	10	48.1043	0.364742	-0.438014	170.097	2.2307	122.805	-5.43587	99.5419	4.29448e-05	0.999957	0.00401689	0.995983
	6	46	11	49.3194	7.53453	0.877056	57.6353	1.76069	13.5059	-17.6227	192.007	0.998407	0.00159269	0.994089	0.00591093
	0.5	47	1	6.01081	0.135473	-0.868149	290.031	2.46244	277.826	-2.24755	55.766	1.055e-07	1	1.6695e-15	1
	0.5	47	2	29.5935	0.156314	-0.806001	278.097	2.4442	259.483	-3.25011	36.4265	2.08409e-07	1	5.59392e-14	1
	0.5	47	3	30.6606	0.145894	-0.835964	283.893	2.45315	258.261	-2.82895	43.5677	1.49622e-07	1	9.11037e-14	1
	0.5	47	4	33.2929	0.125052	-0.902911	263.251	2.42037	234.107	4.004	38.0147	1.49684e-07	1	1.68578e-11	1
	0.5	47	5	40.1561	0.187577	-0.72682	242.034	2.38388	134.667	-6.46691	151.559	8.05821e-07	0.999999	0.0170442	0.982956
	0.5	47	6	43.6993	0.170904	-0.767248	239.655	2.37959	212.144	-0.440214	67.4113	6.39529e-07	0.999999	3.03189e-09	1
	0.5	47	7	44.6872	0.160483	-0.794571	246.133	2.39117	225.709	-2.82562	38.3716	4.55389e-07	1	7.5629e-11	1
	1	48	1	9.48538	0.598177	-0.22317	188.464	2.27523	133.647	1.52767	60.3037	0.000177998	0.999822	0.000349509	0.99965
	1	48	2	13.2141	0.287625	-0.541173	162.932	2.21201	133.118	0.163333	45.3602	2.39516e-05	0.999976	0.000229835	0.99977
	1	48	3	15.0295	0.308468	-0.510791	131.242	2.11807	82.6479	-2.66767	115.478	8.25378e-05	0.999917	0.243507	0.756493
	1	48	4	30.5716	0.348068	-0.458336	126.569	2.10233	49.6143	-14.2144	112.786	0.000140687	0.999859	0.836818	0.163182
	1	48	5	32.1682	0.220929	-0.655746	169.587	2.22939	125.874	-1.35758	51.9728	8.79244e-06	0.999991	0.000650519	0.999349
	1	48	6	36.7139	0.27512	-0.560478	157.323	2.19679	131.637	-0.407536	41.0159	2.47013e-05	0.999975	0.00025563	0.999744
	1	48	7	56.4787	0.235519	-0.627974	179.792	2.25477	165.17	-3.73889	42.5354	7.89469e-06	0.999992	3.48125e-06	0.999997
	10	49	1	3.25968	0.189662	-0.722021	235.908	2.37274	205.909	1.0696	37.8526	9.60587e-07	0.999999	2.98419e-09	1
	10	49	2	5.36888	0.54189	-0.266089	159.331	2.2023	90.4655	-0.773562	98.128	0.000241113	0.999759	0.0876561	0.912344
	10	49	3	7.4364	0.235514	-0.627984	180.035	2.25536	158.246	-8.51727	95.1637	7.84002e-06	0.999992	5.2487e-05	0.999948
	10	49	4	8.8078	0.195914	-0.707934	211.889	2.32611	191.207	3.30815	24.7788	1.90415e-06	0.999998	2.83972e-08	1
	10	49	5	9.80613	0.206335	-0.685427	197.065	2.29461	146.496	2.3233	92.0341	3.28144e-06	0.999997	0.000381184	0.999619
	10	49	6	13.5743	0.231345	-0.635739	178.422	2.25145	130.397	-7.23258	87.9833	7.77462e-06	0.999992	0.00129386	0.998706
	10	49	7	21.3651	0.16882	-0.772577	188.097	2.27438	174.479	-3.73061	47.2282	2.36639e-06	0.999998	9.03615e-07	0.999999
	10	49	8	32.1508	0.206335	-0.685427	207.37	2.31675	196.55	-7.53452	55.6278	2.50329e-06	0.999997	4.36921e-08	1
	10	49	9	34.3704	0.202167	-0.69429	212.133	2.32661	176.322	4.61041	74.9283	2.08271e-06	0.999998	3.69504e-06	0.999996
	10	49	10	49.6413	0.179241	-0.746564	217.996	2.33845	164.738	3.98428	47.4158	1.24887e-06	0.999999	4.39554e-06	0.999996
	0	50	1	3.84751	0.158402	-0.800239	277.501	2.44326	259.289	-1.63233	28.9286	2.1984e-07	1	4.25805e-14	1
	0	50	2	10.2524	0.20634	-0.685417	236.272	2.37341	196.346	-7.05615	86.4961	1.24312e-06	0.999999	1.02055e-07	1
	0	50	3	18.4851	0.181329	-0.741533	256.32	2.40878	202.127	10.9932	28.9701	5.26784e-07	0.999999	1.75102e-08	1
	0	50	4	20.2109	0.212592	-0.672452	206.962	2.31589	195.267	-2.34466	31.5384	2.77346e-06	0.999997	1.87399e-08	1
	0	50	5	22.1555	0.164655	-0.783425	248.902	2.39603	234.133	0.580335	19.0115	4.6152e-07	1	7.02177e-12	1
	0	50	6	24.7295	0.0979593	-1.00895	227.503	2.35699	109.002	23.6769	12.3238	1.93972e-07	1	0.240989	0.759011
	0	50	7	34.5504	0.172992	-0.761974	256.847	2.40968	201.188	-4.91609	82.5337	4.49414e-07	1	3.57695e-08	1
	0	50	8	41.7411	0.220929	-0.655746	221.452	2.34528	195.544	-2.27147	35.7332	2.18837e-06	0.999998	1.92466e-08	1
	0	50	9	45.9283	0.156318	-0.805991	265.705	2.4244	252.535	-0.129071	22.7794	2.7132e-07	1	1.52849e-13	1
	0	50	10	50.2635	0.19175	-0.717264	240.76	2.38158	224.606	0.701176	24.2187	8.8888e-07	0.999999	5.58377e-11	1
	0	50	11	51.1139	0.279288	-0.553947	193.878	2.28753	140.682	7.50109	61.6601	9.29708e-06	0.999991	0.000412453	0.999588
	200	51	1	0	53.9964	1.73236	79.205	1.89875	0.240737	5.24977	78.6084	1	2.47994e-09	0.924517	0.0754832
	200	51	2	54.728	5.27104	0.721897	72.0166	1.85743	27.747	-25.7218	236.907	0.986238	0.0137624	0.999708	0.000292051
	10	52	1	4.52478	0.223009	-0.651678	193.53	2.28675	171.471	2.7252	33.451	4.571e-06	0.999995	8.82898e-07	0.999999
	10	52	2	5.20215	0.67111	-0.173206	220.52	2.34345	113.369	-5.41571	213.053	0.000151812	0.999848	0.973262	0.0267384
	10	52	3	21.9841	0.295955	-0.528774	184.332	2.2656	161.809	3.13945	21.9441	1.44456e-05	0.999986	2.84653e-06	0.999997
	10	52	4	33.9057	0.23343	-0.631844	206.22	2.31433	169.887	-4.25023	59.6757	3.79174e-06	0.999996	2.52624e-06	0.999997
	10	52	5	58.1052	0.216756	-0.664029	213.085	2.32855	183.797	-1.91602	57.262	2.5253e-06	0.999997	2.44935e-07	1
	200	53	1	0	28.5937	1.45627	76.0707	1.88122	6.39778	4.51254	49.9115	1	3.24304e-07	0.797083	0.202917
	200	53	2	29.0293	27.1014	1.43299	77.1595	1.88739	10.3065	-18.404	247.514	1	4.74412e-07	0.999732	0.000268395
	200	53	3	56.5037	3.49319	0.543222	56.5213	1.75221	21.7786	-18.1686	232.751	0.92629	0.0737104	0.999254	0.000746373
	0	54	1	5.61494	0.166739	-0.777962	271.701	2.43409	227.342	1.58053	70.615	2.91169e-07	1	2.66502e-10	1
	0	54	2	6.33192	0.156318	-0.805991	269.261	2.43017	241.889	4.29144	41.1159	2.51269e-07	1	4.15169e-12	1
	0	54	3	14.9857	0.133391	-0.874872	248.136	2.39469	227.793	0.0457669	39.7886	2.54808e-07	1	4.86757e-11	1
	0	54	4	17.1929	0.17716	-0.751633	259.977	2.41493	231.761	-2.64689	40.3777	4.52198e-07	1	2.34225e-11	1
	0	54	5	25.5507	0.15215	-0.817729	264.161	2.42187	235.539	0.345537	74.4576	2.58655e-07	1	5.67535e-11	1
	0	54	6	38.9461	0.156318	-0.805991	282.342	2.45078	267.987	1.93479	25.7736	1.9088e-07	1	5.18418e-15	1
	0	54	7	49.8071	0.135476	-0.868139	253.678	2.40428	242.571	-1.60237	28.9213	2.33657e-07	1	1.68684e-12	1
	1	55	1	14.1808	0.231345	-0.635739	202.886	2.30725	184.405	-2.91747	27.9223	4.01057e-06	0.999996	1.21839e-07	1
	1	55	2	32.9886	0.225093	-0.647638	202.263	2.30592	186.054	-3.79188	35.9442	3.73845e-06	0.999996	1.14145e-07	1
	1	55	3	38.2825	0.704457	-0.152145	148.262	2.17103	102.2	-9.1209	104.293	0.000896058	0.999104	0.0424224	0.957578
	1	55	4	41.2899	0.19383	-0.712579	224.968	2.35212	211.806	2.60269	24.4469	1.33217e-06	0.999999	6.81096e-10	1
	1	55	5	53.2511	0.435596	-0.360916	117.653	2.0706	58.1948	-18.1313	180.638	0.000393516	0.999606	0.970952	0.0290476
	1	55	6	54.4579	0.475196	-0.323127	115.702	2.06334	57.2659	-18.6702	144.665	0.000561622	0.999438	0.93771	0.06229
	6	56	1	4.49987	0.502302	-0.299035	136.387	2.13477	101.534	-4.1104	67.6335	0.000346363	0.999654	0.0132494	0.986751
	6	56	2	12.3762	0.57525	-0.240143	148.133	2.17065	99.535	3.17101	64.4911	0.000407525	0.999592	0.0167433	0.983257
	6	56	3	18.4851	0.200087	-0.698781	192.681	2.28484	163.99	-3.23982	51.7503	3.3733e-06	0.999997	4.71203e-06	0.999995
	6	56	4	36.7285	0.264698	-0.577249	185.068	2.26733	110.616	0.76032	82.0912	9.83642e-06	0.99999	0.0093065	0.990693
	0	57	1	1.85077	0.237598	-0.624157	235.044	2.37115	192.338	-2.21078	73.5778	2.02913e-06	0.999998	1.13203e-07	1
	0	57	2	7.01332	0.172988	-0.761983	245.202	2.38952	231.623	0.840959	34.1152	5.83521e-07	0.999999	1.87106e-11	1
	0	57	3	8.91827	0.19383	-0.712579	219.985	2.34239	200.009	-2.42623	30.5619	1.50463e-06	0.999998	7.98995e-09	1
	0	57	4	18.7765	0.162567	-0.788967	236.403	2.37365	222.915	0.0610536	16.2716	5.94939e-07	0.999999	6.58885e-11	1
	0	57	5	26.0962	0.179241	-0.746563	224.599	2.35141	209.772	1.59947	21.7477	1.05936e-06	0.999999	9.08046e-10	1
	0	57	6	57.5571	0.195914	-0.707934	221.395	2.34517	199.163	-2.66182	32.7203	1.5019e-06	0.999998	9.88198e-09	1
	0.5	58	1	7.56372	0.198003	-0.703328	216.496	2.33545	192.346	-9.58933	85.5299	1.75128e-06	0.999998	2.43209e-07	1
	0.5	58	2	11.2528	0.250109	-0.60187	195.814	2.29184	170.603	-1.94569	80.3367	6.17024e-06	0.999994	4.61646e-06	0.999995
	0.5	58	3	11.6926	0.435607	-0.360905	238.397	2.3773	187.938	0.905224	70.5012	1.7605e-05	0.999982	2.54662e-07	1
	0.5	58	4	15.4192	0.156318	-0.80599	226.656	2.35537	202.092	-1.90562	42.8906	6.73906e-07	0.999999	7.0363e-09	1
	0.5	58	5	17.5431	0.22093	-0.655746	222.302	2.34694	208.271	-1.3808	27.6723	2.14448e-06	0.999998	1.53341e-09	1
	0.5	58	6	31.3574	0.210509	-0.67673	225.136	2.35244	204.494	-4.29039	48.8219	1.71797e-06	0.999998	6.19442e-09	1
	0.5	58	7	44.8487	0.491881	-0.30814	139.718	2.14525	62.0421	-6.9446	205.042	0.00029084	0.999709	0.995572	0.00442803
	200	59	1	0.42726	59.5705	1.77503	87.5623	1.94232	0.0656812	-0.182408	267.114	1	9.93348e-10	1	1.6627e-07
	10	60	1	3.87669	0.198003	-0.703328	206.087	2.31405	187.113	-11.884	113.807	2.28298e-06	0.999998	1.9761e-06	0.999998
	10	60	2	6.03388	0.32931	-0.482395	158.465	2.19993	72.5398	-1.73869	209.95	4.22538e-05	0.999958	0.999192	0.000808364
	10	60	3	7.77631	6.67166	0.824234	48.9498	1.68975	14.6786	-32.0423	284.475	0.997283	0.00271677	0.999994	6.21367e-06
	10	60	4	22.8433	36.9745	1.5679	39.8718	1.60067	9.21871	-29.3744	252.994	1	9.29596e-08	0.999946	5.40807e-05
	0.5	61	1	5.6815	0.208419	-0.681063	239.512	2.37933	196.877	-8.74209	76.1183	1.19277e-06	0.999999	7.76101e-08	1
	0.5	61	2	7.5677	0.135472	-0.868149	252.063	2.40151	235.027	-1.20325	45.2439	2.42599e-07	1	1.36524e-11	1
	0.5	61	3	21.2858	0.187577	-0.72682	246.603	2.392	233.44	-5.24507	42.2055	7.26701e-07	0.999999	2.17523e-11	1
	0.5	61	4	30.475	0.187577	-0.72682	250.173	2.39824	219.676	-0.0967054	56.3632	6.71102e-07	0.999999	4.57362e-10	1
	0	62	1	0.917044	0.152146	-0.81774	270.173	2.43164	243.649	1.61465	31.5464	2.26967e-07	1	1.44112e-12	1
	0	62	2	6.71735	0.152146	-0.81774	289.275	2.46131	280.815	0.280288	9.27745	1.52386e-07	1	1.36048e-16	1
	0	62	3	9.31008	0.223008	-0.651679	248.719	2.39571	171.578	-13.5898	93.5257	1.21621e-06	0.999999	1.61864e-05	0.999984
	0	62	4	12.6406	0.177156	-0.751644	267.727	2.42769	242.578	1.59581	51.0238	3.83192e-07	1	4.29554e-12	1
	0	62	5	13.9974	0.220924	-0.655757	251.693	2.40087	207.824	1.18015	57.4303	1.10584e-06	0.999999	4.70047e-09	1
	0	62	6	17.9678	0.191746	-0.717275	244.847	2.38889	202.848	5.47335	64.8189	8.10238e-07	0.999999	3.37269e-08	1
	0	62	7	19.5455	0.131304	-0.881722	250.754	2.39925	210.343	7.53906	68.4552	2.29174e-07	1	2.03261e-08	1
	0	62	8	27.455	0.164651	-0.783435	239.73	2.37972	224.996	0.597012	13.3951	5.70881e-07	0.999999	3.98113e-11	1
	0	62	9	38.7451	0.168819	-0.772578	247.431	2.39345	236.573	-1.80283	20.0493	5.14793e-07	0.999999	4.95072e-12	1
	0	62	10	45.5062	0.166735	-0.777973	240.608	2.38131	216.597	0.72566	37.1614	5.80624e-07	0.999999	3.96944e-10	1
	0	62	11	48.0302	0.164651	-0.783435	261.498	2.41747	234.385	4.27663	37.9639	3.48439e-07	1	1.64611e-11	1
	0	62	12	57.3694	0.150062	-0.82373	251.72	2.40092	230.434	5.38218	7.06936	3.28264e-07	1	1.17232e-11	1
	10	63	1	2.3281	0.285541	-0.544332	157.505	2.1973	137.681	-9.23647	88.4561	2.75621e-05	0.999972	0.000686727	0.999313
	10	63	2	3.88294	0.352237	-0.453166	136.349	2.13465	73.6034	-10.4505	129.563	0.000104598	0.999895	0.493842	0.506158
	10	63	3	9.89597	0.300131	-0.52269	168.875	2.22756	142.486	-9.62603	91.3648	2.3103e-05	0.999977	0.000426017	0.999574
	10	63	4	11.4612	0.364742	-0.438014	175.89	2.24524	99.189	-9.19718	114.707	3.68025e-05	0.999963	0.0730818	0.926918
	10	63	5	17.5222	0.220929	-0.655746	208.186	2.31845	172.056	2.40243	35.5401	3.03122e-06	0.999997	8.47377e-07	0.999999
	10	63	6	19.6877	5.06262	0.704375	45.7003	1.65992	15.7653	-9.86956	180.8	0.989774	0.0102256	0.98733	0.0126698
	10	63	7	25.1964	0.646114	-0.189691	70.4812	1.84807	27.1883	-19.1524	205.886	0.00973045	0.99027	0.996691	0.00330866
	10	63	8	26.3844	0.181329	-0.741533	196.716	2.29384	160.33	-13.8338	90.8925	2.26551e-06	0.999998	8.55283e-05	0.999914
	10	63	9	44.0838	0.418932	-0.377856	113.917	2.05659	40.378	-7.40348	182.224	0.000397405	0.999603	0.986107	0.0138933
	10	63	10	45.7303	3.14095	0.497061	41.2466	1.61539	19.2841	-27.501	191.6	0.925781	0.0742188	0.999469	0.000530637
	10	63	11	54.4049	0.254277	-0.594692	157.654	2.1977	61.2795	-12.9107	155.506	1.92464e-05	0.999981	0.859161	0.140839
	0.5	64	1	5.07917	0.245934	-0.609181	294.296	2.46878	242.088	-6.04055	73.4504	6.94937e-07	0.999999	1.06552e-11	1
	0.5	64	2	7.38429	0.133388	-0.874883	254.676	2.40599	236.661	-0.434342	35.2228	2.18496e-07	1	6.8418e-12	1
	0.5	64	3	8.80154	0.122967	-0.910211	302.949	2.48137	261.235	3.11809	41.3319	6.09502e-08	1	5.51656e-14	1
	0.5	64	4	9.71024	0.139641	-0.854988	315.364	2.49881	294.78	2.39602	21.747	7.00608e-08	1	6.57099e-18	1
	0.5	64	5	10.3918	0.164651	-0.783435	284.147	2.45354	262.686	-9.51917	80.1987	2.16443e-07	1	2.13623e-13	1
	0.5	64	6	12.8032	0.160483	-0.794572	272.576	2.43549	252.173	-5.22328	45.6387	2.53816e-07	1	4.40607e-13	1
	0.5	64	7	15.7919	0.170904	-0.767249	260.938	2.41654	252.176	-1.16631	48.8068	3.95782e-07	1	4.23929e-13	1
	0.5	64	8	19.8728	0.166735	-0.777973	255.778	2.40786	241.394	-1.99453	25.9684	4.10743e-07	1	2.06121e-12	1
	0.5	64	9	23.4992	0.135472	-0.868149	269.875	2.43116	222.681	0.962042	51.61	1.62013e-07	1	2.2355e-10	1
	0.5	64	10	31.8485	0.15423	-0.811831	291.483	2.46461	262.158	4.4651	27.9881	1.52053e-07	1	2.69578e-14	1
	0.5	64	11	33.0219	0.158398	-0.800249	280.684	2.44822	267.322	-3.32764	30.4233	2.05784e-07	1	7.79509e-15	1
	0.5	64	12	59.8225	0.15423	-0.811831	209.774	2.32175	192.372	-13.3048	102.508	1.00552e-06	0.999999	7.02866e-07	0.999999
	6	65	1	37.6435	0.446027	-0.350639	92.5574	1.96641	51.5609	-35.2734	225.433	0.0011329	0.998867	0.999969	3.10614e-05
	6	65	2	41.6056	7.19896	0.85727	56.8006	1.75435	15.2385	-39.2916	262.709	0.997976	0.00202372	0.999999	9.41616e-07
	6	65	3	51.216	8.7809	0.943539	52.9458	1.72383	10.3685	-35.5969	299.411	0.999355	0.000645231	0.999999	1.11033e-06
	10	66	1	0.141725	0.239682	-0.620365	188.714	2.2758	157.922	2.9337	25.6828	6.50864e-06	0.999993	0.000783535	0.999216
	10	66	2	29.856	0.291787	-0.534935	148.777	2.17254	114.145	-6.52766	71.1191	3.87152e-05	0.999961	0.00508972	0.99491
	1	67	1	3.49944	0.210508	-0.676731	244.533	2.38834	226.805	4.29102	24.8208	1.10136e-06	0.999999	4.22153e-11	1
	1	67	2	10.2169	0.281372	-0.550719	182.351	2.26091	166.618	2.22827	11.8145	1.28965e-05	0.999987	1.15636e-06	0.999999
	1	67	3	18.3017	0.220929	-0.655746	225.478	2.3531	204.987	4.96835	52.4212	1.98917e-06	0.999998	1.00822e-08	1
	1	67	4	27.4432	0.202171	-0.694281	213.051	2.32848	198.653	-3.31369	37.6583	2.0352e-06	0.999998	1.26305e-08	1
	1	67	5	28.3873	0.208424	-0.681052	230.767	2.36317	215.262	-0.635259	36.0545	1.45773e-06	0.999999	4.92275e-10	1
	1	67	6	37.8081	0.248025	-0.605505	206.47	2.31486	145.002	5.3266	62.4524	4.58177e-06	0.999995	0.000157114	0.999843
	1	67	7	42.3101	0.210508	-0.676731	244.048	2.38748	205.599	-1.70386	59.236	1.11324e-06	0.999999	6.46566e-09	1
	1	67	8	43.8899	0.20634	-0.685417	207.153	2.31629	188.512	-2.03893	52.2357	2.51745e-06	0.999997	9.6524e-08	1
	200	68	1	0	0.350152	-0.455743	136.994	2.1367	51.7831	15.127	6.45721	0.000100478	0.9999	0.922121	0.0778794
	200	68	2	0.875381	19.619	1.29268	88.1215	1.94508	15.8963	-27.8935	306.312	0.999995	4.55632e-06	0.999997	2.63921e-06
	200	68	3	21.0904	27.068	1.43246	69.5671	1.8424	14.9384	-7.68898	258.79	0.999999	5.04086e-07	0.999988	1.22593e-05
	200	68	4	48.7004	5.67747	0.754155	124.294	2.09445	4.70796	-9.3761	171.87	0.981213	0.0187873	0.981428	0.0185724
	200	68	5	54.6654	5.33357	0.727018	109.751	2.04041	34.5603	-8.91302	259.344	0.97742	0.0225801	0.999982	1.78542e-05
	0	69	1	0.47728	0.220924	-0.655757	261.725	2.41784	200.882	-8.06146	76.1215	8.9606e-07	0.999999	3.57158e-08	1
	0	69	2	3.13254	0.302208	-0.519695	331.618	2.52064	266.755	-4.74179	78.5768	8.09497e-07	0.999999	6.47549e-14	1
	0	69	3	5.5627	0.127136	-0.895733	320.817	2.50626	300.337	-7.19372	61.6411	4.74172e-08	1	9.59934e-18	1
	0	69	4	6.15253	0.131304	-0.881722	336.104	2.52647	307.833	5.88377	7.12122	3.93887e-08	1	1.53938e-19	1
	0	69	5	10.5398	0.504374	-0.297247	329.763	2.5182	235.989	-2.9773	143.221	7.30882e-06	0.999993	5.39258e-09	1
	0	69	6	12.922	0.46269	-0.33471	309.938	2.49127	266.25	3.84895	26.9604	6.66592e-06	0.999993	9.42118e-15	1
	0	69	7	13.4826	0.195914	-0.707935	311.227	2.49308	242.292	-21.0924	183.618	2.28868e-07	1	1.31178e-08	1
	0	69	8	15.25	0.122967	-0.910211	328.004	2.51588	307.421	2.78114	16.6666	3.74444e-08	1	2.01031e-19	1
	0	69	9	38.2386	0.166735	-0.777973	274.098	2.43791	221.943	6.59306	29.5274	2.76882e-07	1	1.79921e-10	1
	0	69	10	41.6255	0.200082	-0.698791	237.912	2.37642	168.488	-12.2074	93.7804	1.08525e-06	0.999999	1.94265e-05	0.999981
	0	69	11	49.9893	0.11463	-0.9407	347.578	2.54105	329.112	-5.73225	48.5592	2.11695e-08	1	2.18199e-21	1
	0	69	12	54.3474	0.141725	-0.848554	309.389	2.4905	270.413	-5.10966	64.1533	8.22392e-08	1	1.39878e-14	1
	0	69	13	55.4728	0.141725	-0.848554	326.028	2.51325	311.498	-4.48584	45.0586	6.0108e-08	1	2.18678e-19	1
	10	70	1	2.88042	0.19175	-0.717265	182.143	2.26041	162.103	-4.41881	51.0008	4.02116e-06	0.999996	6.78213e-06	0.999993
	10	70	2	8.06391	0.0979592	-1.00895	101.474	2.00636	48.3133	-5.2111	278.967	2.32906e-05	0.999977	1	3.92452e-07
	10	70	3	28.7958	31.201	1.49417	42.7899	1.63134	9.55485	-13.3652	191.459	1	2.72314e-07	0.992324	0.00767628
	0	71	1	3.25759	0.168819	-0.772578	263.338	2.42051	250.767	-0.399125	22.2794	3.61682e-07	1	2.24651e-13	1
	0	71	2	4.01624	0.143809	-0.842213	259.086	2.41344	237.238	-5.97231	96.4182	2.45093e-07	1	8.6765e-11	1
	0	71	3	4.86867	0.172988	-0.761984	267.181	2.42681	254.039	-1.10868	44.1454	3.59528e-07	1	2.32831e-13	1
	0	71	4	8.55769	0.160483	-0.794572	261.241	2.41704	229.304	8.91495	4.99657	3.23982e-07	1	2.03681e-11	1
	0	71	5	8.92659	0.145893	-0.835965	280.788	2.44838	254.611	-7.13854	68.9903	1.5962e-07	1	6.63765e-13	1
	0	71	6	10.1729	0.172988	-0.761984	281.965	2.4502	205.933	4.75632	74.2297	2.64727e-07	1	3.10843e-08	1
	0	71	7	36.5984	0.152146	-0.81774	241.201	2.38238	229.828	-2.03483	34.8389	4.37045e-07	1	2.87039e-11	1
	0	71	8	55.0789	0.223008	-0.651679	226.193	2.35448	183.83	-6.04974	56.9225	2.01622e-06	0.999998	3.13396e-07	1
	0	71	9	56.369	0.208419	-0.681063	240.009	2.38023	220.424	-2.76748	33.9956	1.17949e-06	0.999999	1.91757e-10	1
	1	72	1	8.72652	0.145894	-0.835964	287.227	2.45823	278.439	-3.87854	115.848	1.39679e-07	1	6.108e-14	1
	1	72	2	10.4085	0.16882	-0.772577	268.78	2.4294	251.681	-0.691393	38.0976	3.21942e-07	1	3.09784e-13	1
	1	72	3	10.9879	0.152146	-0.817739	297.035	2.47281	275.163	-2.43583	123.936	1.30491e-07	1	3.37348e-13	1
	1	72	4	12.9991	0.23343	-0.631844	229.504	2.36079	156.701	-8.46211	141.278	2.16847e-06	0.999998	0.000555428	0.999445
	1	72	5	15.6606	0.16882	-0.772577	292.466	2.46607	258.586	-5.71607	111.833	1.98557e-07	1	2.83276e-12	1
	1	72	6	39.1537	0.187577	-0.72682	240.286	2.38073	183.16	-14.9636	110.242	8.38716e-07	0.999999	5.33252e-06	0.999995
	1	72	7	39.8414	0.166735	-0.777972	286.108	2.45653	248.489	-4.3618	46.5844	2.16513e-07	1	9.40485e-13	1
	1	72	8	41.7839	0.150062	-0.82373	277.683	2.44355	253.759	0.685046	57.5027	1.85539e-07	1	5.13759e-13	1
	1	72	9	45.475	0.183409	-0.736579	257.35	2.41052	229.012	-5.21685	65.962	5.34036e-07	0.999999	1.07922e-10	1
	1	72	10	55.8147	0.200083	-0.698791	232.088	2.36565	190.819	-6.93824	84.8371	1.24173e-06	0.999999	2.39367e-07	1
	200	73	1	0	4.2374	0.6271	122.436	2.08791	3.8148	-16.9299	259.596	0.905316	0.0946843	0.836526	0.163474
	200	73	2	4.7293	55.2676	1.74247	90.0908	1.95468	0.732351	-18.6506	246.074	1	1.77052e-09	0.999681	0.000319007
	6	74	1	2.52604	0.200082	-0.698791	195.307	2.29072	179.447	3.46157	22.7012	3.13884e-06	0.999997	1.90435e-07	1
	6	74	2	4.62899	0.168819	-0.772578	204.927	2.3116	189.957	2.34388	9.47609	1.47624e-06	0.999999	2.43805e-08	1
	6	74	3	15.819	1.19841	0.0786053	48.996	1.69016	26.1618	-11.8932	156.48	0.181296	0.818704	0.955696	0.0443045
	6	74	4	17.8782	0.650267	-0.186908	80.539	1.90601	56.2842	-17.2568	117.949	0.00625552	0.993744	0.894889	0.105111
	6	74	5	21.2191	0.325134	-0.487938	165.709	2.21935	114.565	-1.68389	85.3491	3.28594e-05	0.999967	0.00595914	0.994041
	6	74	6	42.7071	17.2904	1.23781	35.8567	1.55457	7.62285	-11.5047	172.945	0.999987	1.29109e-05	0.981546	0.0184542
	0.5	75	1	7.5783	0.218845	-0.659863	218.96	2.34036	176.516	-4.17662	39.8152	2.25419e-06	0.999998	6.05242e-07	0.999999
	0.5	75	2	15.3879	0.216761	-0.664019	227.447	2.35688	191.097	-11.2532	88.5794	1.78622e-06	0.999998	4.15923e-07	1
	0.5	75	3	25.0942	0.200087	-0.698781	243.426	2.38637	200.744	-4.30009	52.8892	9.57964e-07	0.999999	1.34504e-08	1
	0.5	75	4	32.8768	0.15215	-0.817729	259.233	2.41369	209.186	-8.21756	93.8825	2.88458e-07	1	1.57665e-08	1
	0.5	75	5	36.2032	0.193834	-0.712569	259.407	2.41398	185.479	-13.3184	126.225	6.0993e-07	0.999999	4.97204e-06	0.999995
	0.5	75	6	38.8211	0.214677	-0.668215	232.773	2.36693	199.97	-4.88083	46.6184	1.53011e-06	0.999998	1.40623e-08	1
	0.5	75	7	43.4126	0.147981	-0.829794	247.626	2.3938	206.149	9.20315	20.294	3.46531e-07	1	3.55366e-09	1
	10	76	1	2.14047	0.202167	-0.69429	207.051	2.31608	139.425	-23.5516	152.166	2.37144e-06	0.999998	0.0594189	0.940581
	10	76	2	5.92954	0.172988	-0.761983	230.599	2.36286	165.863	-23.7594	176.438	8.22807e-07	0.999999	0.00463095	0.995369
	10	76	3	7.45308	0.177157	-0.751643	246.36	2.39157	219.177	-14.7186	128.359	6.1143e-07	0.999999	2.13517e-08	1
	10	76	4	9.34137	0.160483	-0.794571	260.978	2.4166	221.513	-11.9087	92.643	3.25856e-07	1	2.30354e-09	1
	10	76	5	14.0892	0.318882	-0.49637	145.428	2.16265	75.4226	-26.9756	272.227	5.68236e-05	0.999943	0.999862	0.00013778
	10	76	6	22.0633	0.195914	-0.707934	192.104	2.28354	130.183	-15.9259	138.159	3.22159e-06	0.999997	0.0176876	0.982312
	10	76	7	32.4072	0.408502	-0.388805	202.339	2.30608	126.627	-11.7244	158.737	2.91529e-05	0.999971	0.0433516	0.956648
	10	76	8	38.6931	21.3046	1.32847	33.3233	1.52275	7.89592	-27.0986	269.327	0.999996	3.86342e-06	0.999961	3.85256e-05
	6	77	1	3.81625	0.120886	-0.917624	279.788	2.44683	265.138	-2.44826	36.4144	9.42204e-08	1	1.46991e-14	1
	6	77	2	6.48825	0.266783	-0.573842	161.891	2.20922	102.668	-28.1916	196.641	1.95425e-05	0.99998	0.973689	0.0263113
	6	77	3	8.22234	0.337647	-0.471537	147.488	2.16876	94.3949	-11.5638	230.256	6.39004e-05	0.999936	0.993634	0.00636551
	6	77	4	8.93723	0.293878	-0.531833	116.041	2.06461	80.7379	-26.4994	236.324	0.000126375	0.999874	0.998145	0.00185548
	6	77	5	12.2949	0.202172	-0.69428	203.709	2.30901	179.761	1.76044	32.2568	2.58698e-06	0.999997	2.24332e-07	1
	6	77	6	13.5997	0.20634	-0.685417	212.616	2.3276	199.96	-12.0062	99.5916	2.19116e-06	0.999998	1.44424e-07	1
	6	77	7	16.3592	0.235519	-0.627973	188.822	2.27605	164.554	-12.6881	117.17	6.14501e-06	0.999994	7.21577e-05	0.999928
	6	77	8	19.4376	0.189666	-0.72201	198.597	2.29797	158.881	-18.8832	122.716	2.45146e-06	0.999998	0.000678973	0.999321
	6	77	9	21.2947	0.464786	-0.332747	75.7297	1.87927	44.1616	-33.9979	243.814	0.00281058	0.997189	0.999972	2.82055e-05
	6	77	10	23.5165	0.600262	-0.221659	80.6884	1.90681	57.3738	-35.0003	230.453	0.00480231	0.995198	0.999958	4.18665e-05
	6	77	11	27.1243	0.323058	-0.49072	102.964	2.01269	71.7395	-32.4933	196.249	0.000282703	0.999717	0.999531	0.000469209
	6	77	12	30.455	0.387669	-0.411539	116.761	2.0673	43.0728	-14.0809	216.546	0.000280206	0.99972	0.997166	0.00283352
	6	77	13	32.5121	0.323058	-0.49072	130.082	2.11422	80.2361	-30.1452	230.94	9.8878e-05	0.999901	0.999092	0.000908409
	6	77	14	40.8116	0.589841	-0.229265	72.2341	1.85874	41.115	-35.0473	266.671	0.00675194	0.993248	0.999992	8.09456e-06
	6	77	15	41.6265	18.3705	1.26412	52.7402	1.72214	10.4608	-3.56138	179.324	0.999992	7.70633e-06	0.994549	0.00545073
	0.5	78	1	4.98123	0.195914	-0.707934	254.271	2.4053	217.439	6.30289	7.98592	7.04982e-07	0.999999	1.72097e-10	1
	0.5	78	2	12.7136	0.166736	-0.777972	267.421	2.4272	235.692	-2.05628	55.2848	3.18786e-07	1	1.75545e-11	1
	0.5	78	3	23.1763	0.139641	-0.854987	229.153	2.36013	205.51	-0.249935	35.4409	4.60896e-07	1	2.94709e-09	1
	0.5	78	4	24.483	0.120883	-0.917634	291.179	2.46416	277.713	2.37598	56.5073	7.38912e-08	1	2.73182e-15	1
	0.5	78	5	27.2113	0.185493	-0.731671	190.279	2.27939	169.951	-3.22545	101.557	2.89453e-06	0.999997	1.33272e-05	0.999987
	0.5	78	6	28.5952	0.554396	-0.25618	216.641	2.33574	149.37	0.711723	67.0513	7.22631e-05	0.999928	5.95729e-05	0.99994
	0.5	78	7	31.736	0.162567	-0.788967	254.846	2.40628	224.599	-6.94123	59.9999	3.88236e-07	1	2.44628e-10	1
	0.5	78	8	34.8269	0.212588	-0.672461	219.089	2.34062	200.854	2.09659	24.967	2.04962e-06	0.999998	5.08923e-09	1
	0.5	78	9	44.5997	0.204251	-0.689835	228.47	2.35883	194.847	-7.09054	77.2235	1.44281e-06	0.999999	9.50463e-08	1
	0.5	78	10	49.8435	0.350145	-0.455752	131.787	2.11987	96.6221	-11.696	126.597	0.000119608	0.99988	0.152696	0.847304
	0.5	78	11	53.4096	0.164651	-0.783434	247.152	2.39296	201.87	3.24915	61.3727	4.80343e-07	1	2.11759e-08	1
	0.5	78	12	56.7589	0.191746	-0.717274	189.614	2.27787	163.228	2.68876	42.5972	3.24455e-06	0.999997	4.05378e-06	0.999996
	0.5	78	13	57.5509	0.200083	-0.69879	167.617	2.22432	132.62	-17.5814	138.435	7.03206e-06	0.999993	0.018777	0.981223
	0	79	1	2.69909	0.145897	-0.835954	275.046	2.43941	251.049	-4.21482	51.6051	1.80224e-07	1	6.31282e-13	1
	0	79	2	9.10606	0.181329	-0.741532	256.473	2.40904	192.968	-15.3867	109.564	5.2503e-07	0.999999	1.16976e-06	0.999999
	0	79	3	16.7886	0.160487	-0.794561	257.484	2.41075	234.425	-2.96381	27.0608	3.52043e-07	1	9.96945e-12	1
	0	79	4	17.7953	0.183413	-0.736569	265.92	2.42475	226.203	-3.85125	55.0601	4.44672e-07	1	1.19862e-10	1
	0	79	5	37.8853	0.168824	-0.772567	247.512	2.3936	230.102	2.08199	49.132	5.1388e-07	0.999999	5.16913e-11	1
	0	79	6	59.23	0.160487	-0.794561	262.988	2.41994	187.048	-8.23354	111.49	3.11854e-07	1	1.43689e-06	0.999999
	1	80	1	6.46934	0.15423	-0.81183	234.287	2.36975	204.103	-8.49874	60.7867	5.36973e-07	0.999999	1.47015e-08	1
	1	80	2	10.025	0.254272	-0.594702	176.533	2.24683	133.269	-3.22179	137.947	1.09681e-05	0.999989	0.0125356	0.987464
	1	80	3	12.9387	0.108378	-0.965058	293.491	2.46759	284.211	2.9522	4.76975	5.18167e-08	1	4.9758e-17	1
	1	80	4	35.3146	0.189662	-0.72202	266.388	2.42552	218.182	7.81225	24.6834	4.90539e-07	1	3.61143e-10	1
	1	80	5	42.5093	0.252188	-0.598276	174.139	2.2409	141.178	-13.3618	117.977	1.14475e-05	0.999989	0.00175662	0.998243
	1	80	6	55.2541	0.239683	-0.620364	234.718	2.37055	96.6454	-17.0148	163.417	2.1047e-06	0.999998	0.561356	0.438644
	0	81	1	9.37075	0.214677	-0.668215	290.959	2.46383	246.332	5.74526	52.0322	4.56453e-07	1	4.05776e-12	1
	0	81	2	11.8864	0.112549	-0.948658	275.379	2.43993	246.278	4.99101	52.5819	8.51886e-08	1	3.62516e-12	1
	0	81	3	15.1108	0.187582	-0.726809	270.604	2.43233	249.976	4.95251	14.1049	4.33605e-07	1	2.32988e-13	1
	0	81	4	16.3467	0.13756	-0.861508	325.061	2.51196	314.8	1.77907	7.32901	5.57375e-08	1	1.81341e-20	1
	0	81	5	25.3652	0.143813	-0.842203	250.091	2.3981	232.376	2.31439	13.6574	3.01229e-07	1	8.58203e-12	1
	0	81	6	28.5333	0.164655	-0.783425	258.382	2.41226	217.683	-6.83263	58.9147	3.73123e-07	1	8.94207e-10	1
	0	81	7	46.0826	0.175076	-0.756772	280.004	2.44716	237.797	8.51014	24.0803	2.86262e-07	1	8.27798e-12	1
	0	81	8	50.2698	0.181329	-0.741532	263.177	2.42025	211.569	6.7271	27.2606	4.54396e-07	1	1.1731e-09	1
	0	81	9	56.7143	0.143813	-0.842203	299.255	2.47604	272.235	-0.36249	69.8193	1.04885e-07	1	1.53009e-14	1
	200	82	1	0	0.627343	-0.202495	226.497	2.35506	177.545	-9.11286	64.141	0.000101217	0.999899	6.82499e-05	0.999932
	200	82	2	1.33597	4.45601	0.648946	115.712	2.06338	31.0314	-9.927	293.977	0.933637	0.066363	1	3.98983e-07
	200	82	3	6.09002	1.8466	0.266372	156.427	2.19431	46.0809	-16.0741	249.088	0.0572232	0.942777	0.999711	0.00028937
	200	82	4	8.11794	7.93036	0.899293	88.9907	1.94934	6.50863	-21.7969	349.288	0.998309	0.00169113	1	2.20518e-08
	200	82	5	16.3609	8.43682	0.926179	81.9819	1.91372	5.61687	-16.5354	331.628	0.998916	0.00108419	1	4.76904e-08
	200	82	6	25.125	6.32137	0.800811	81.9099	1.91334	28.7153	-20.0321	282.579	0.994121	0.00587933	0.999982	1.75233e-05
	200	82	7	32.0341	24.7477	1.39354	66.0745	1.82003	3.54488	-18.3969	280.676	0.999999	9.70479e-07	0.99998	1.97121e-05
	200	82	8	57.2716	1.03168	0.0135437	154.349	2.1885	56.0044	-21.3784	292.566	0.00389402	0.996106	0.999988	1.19131e-05
	200	82	9	59.4559	0.541891	-0.266088	80.4721	1.90565	35.4635	-0.28175	243.12	0.00352129	0.996479	0.999997	3.09518e-06
	10	83	1	2.84493	0.867025	-0.0619682	111.192	2.04608	30.9423	-25.0219	233.937	0.00576011	0.99424	0.999595	0.000405079
	10	83	2	8.36596	0.0917046	-1.03761	314.787	2.49802	270.033	6.6758	29.7736	2.11878e-08	1	6.9049e-15	1
	10	83	3	35.4313	0.694037	-0.158617	84.1926	1.92527	27.9055	-25.6096	313.372	0.00665225	0.993348	0.999999	1.44115e-06
	10	83	4	48.5784	11.4172	1.05756	39.3404	1.59484	10.6649	-38.9395	305.24	0.999863	0.000137271	1	2.77271e-07
	0.5	84	1	0.325142	0.145897	-0.835954	223.768	2.3498	184.226	6.18714	17.1271	5.96852e-07	0.999999	8.86446e-08	1
	0.5	84	2	0.762833	0.710727	-0.148297	273.048	2.43624	149.852	21.834	99.2572	8.12784e-05	0.999919	0.844495	0.155505
	0.5	84	3	3.61616	0.139644	-0.854977	290.377	2.46296	215.709	6.68428	74.9429	1.147e-07	1	9.829e-09	1
	0.5	84	4	7.14687	0.141728	-0.848543	336.054	2.52641	315.518	2.59369	20.6156	5.01084e-08	1	2.71447e-20	1
	0.5	84	5	20.5235	0.314721	-0.502075	153.981	2.18747	103.189	-2.41374	121.176	4.17347e-05	0.999958	0.082487	0.917513
	0.5	84	6	26.9722	0.170908	-0.767238	285.015	2.45487	228.388	-5.44058	79.7461	2.39487e-07	1	2.15865e-10	1
	0.5	84	7	43.4981	0.120886	-0.917624	292.48	2.4661	277.904	2.50922	14.8589	7.19116e-08	1	3.29982e-16	1
	200	85	1	2.02375	57.974	1.76323	77.4626	1.88909	0.437908	-10.8246	280.603	1	1.44374e-09	0.999996	3.84972e-06
	0	86	1	1.32138	0.166736	-0.777972	271.426	2.43365	258.627	2.17839	16.2921	2.92837e-07	1	3.15932e-14	1
	0	86	2	6.07335	0.135473	-0.868148	238.945	2.3783	215.14	8.15438	65.1973	3.32113e-07	1	8.21371e-09	1
	0	86	3	14.8228	0.14381	-0.842212	230.459	2.36259	206.059	1.83741	29.5565	4.83906e-07	1	2.26291e-09	1
	0	86	4	18.3972	0.206335	-0.685426	225.939	2.35399	197.89	5.99063	32.859	1.58192e-06	0.999998	1.5642e-08	1
	0	86	5	21.0587	0.20842	-0.681061	235.958	2.37283	218.415	-0.21173	35.4062	1.29304e-06	0.999999	2.62803e-10	1
	0	86	6	23.0908	0.179241	-0.746563	249.461	2.397	233.821	-1.44813	23.9451	5.91186e-07	0.999999	9.30277e-12	1
	0	86	7	26.8965	0.245935	-0.609179	218.419	2.33929	190.288	-7.95045	56.8801	3.33562e-06	0.999997	1.40545e-07	1
	0	86	8	38.1679	0.141725	-0.848553	211.303	2.32491	189.626	-4.71311	47.8427	7.66158e-07	0.999999	8.52499e-08	1
	0	86	9	46.0232	0.183409	-0.736579	241.732	2.38333	213.529	-5.28507	43.9371	7.56546e-07	0.999999	1.15753e-09	1
	0	86	10	51.8902	0.235514	-0.627983	192.855	2.28523	177.018	-0.252267	28.3714	5.51261e-06	0.999994	3.28815e-07	1
	0	86	11	58.1407	0.229262	-0.639669	216.456	2.33537	127.436	-4.03571	113.667	2.7798e-06	0.999997	0.00483645	0.995164
	0.5	87	1	1.11924	0.166739	-0.777962	244.726	2.38868	229.422	-2.57284	52.7605	5.27603e-07	0.999999	5.62699e-11	1
	0.5	87	2	3.74122	0.229267	-0.639659	229.195	2.3602	196.964	4.97929	22.2639	2.05822e-06	0.999998	1.07877e-08	1
	0.5	87	3	7.38447	0.214677	-0.668215	265.685	2.42437	197.614	0.25741	66.5642	7.49772e-07	0.999999	3.96286e-08	1
	0.5	87	4	8.11396	0.198003	-0.703328	253.967	2.40478	244.579	-0.905016	19.6588	7.34371e-07	0.999999	8.31471e-13	1
	0.5	87	5	16.428	0.187582	-0.726809	236.997	2.37474	217.651	2.45173	17.9669	9.04981e-07	0.999999	1.83813e-10	1
	0.5	87	6	17.4576	0.20634	-0.685417	229.13	2.36008	212.221	-0.820064	40.6467	1.46701e-06	0.999999	1.00623e-09	1
	0.5	87	7	18.9749	0.195919	-0.707924	203.792	2.30919	191.021	1.58558	15.8939	2.34859e-06	0.999998	2.3296e-08	1
	0.5	87	8	27.5495	0.185498	-0.731662	215.915	2.33428	184.485	-9.61721	80.0169	1.45814e-06	0.999999	7.66194e-07	0.999999
	0.5	87	9	28.5437	0.56483	-0.248082	140.328	2.14714	52.8636	-11.6329	210.359	0.000472967	0.999527	0.995263	0.00473727
	0.5	87	10	29.4816	3.42649	0.53485	56.2462	1.75009	17.5003	-28.0009	234.819	0.920435	0.0795653	0.999837	0.000162952
	0.5	87	11	35.6489	0.158402	-0.800238	273.186	2.43646	251.03	-3.24445	37.4455	2.40682e-07	1	3.79431e-13	1
	0.5	87	12	46.5995	0.639862	-0.193913	80.6772	1.90675	33.1236	-15.4762	218.125	0.00590001	0.9941	0.99782	0.00217999
	0.5	87	13	48.0856	0.366827	-0.435539	131.506	2.11894	96.8848	-23.5178	168.466	0.000139946	0.99986	0.865576	0.134424
	0.5	87	14	49.3924	0.348069	-0.458335	144.161	2.15885	97.6617	-13.1703	142.249	7.82451e-05	0.999922	0.247739	0.752261
	0.5	87	15	50.3845	0.273036	-0.56378	159.173	2.20187	134.702	-16.3817	123.818	2.27972e-05	0.999977	0.0079191	0.992081
	0.5	87	16	51.3516	0.143813	-0.842203	237.754	2.37613	217.057	-5.18275	58.6249	4.04124e-07	1	8.51015e-10	1
	10	88	1	7.00915	9.49768	0.977618	43.9085	1.64255	6.9634	-14.9766	215.62	0.999613	0.000387183	0.997967	0.00203312
	10	88	2	16.9445	0.245935	-0.609179	150.767	2.17831	126.952	-8.82126	78.6492	2.17464e-05	0.999978	0.00192557	0.998074
	10	88	3	17.7469	0.55648	-0.25455	104.927	2.02089	47.0622	2.46339	130.815	0.00140711	0.998593	0.931005	0.068995
	10	88	4	21.4089	15.2084	1.18208	48.0285	1.6815	12.3461	-19.3258	195.536	0.999974	2.555e-05	0.995932	0.00406811
	10	88	5	37.0966	22.9011	1.35986	35.7617	1.55342	6.6713	-13.103	148.199	0.999998	2.35376e-06	0.962464	0.0375359
	6	89	1	3.68494	0.789928	-0.102413	66.2135	1.82095	15.4804	-12.1005	217.93	0.0225214	0.977479	0.998556	0.00144418
	6	89	2	7.84926	0.264699	-0.577248	191.26	2.28162	130.807	-11.5116	138.371	8.34365e-06	0.999992	0.0101358	0.989864
	6	89	3	9.13732	0.166739	-0.777962	220.282	2.34298	192.696	-5.31985	61.6255	9.53239e-07	0.999999	7.43712e-08	1
	6	89	4	13.6268	0.568998	-0.244889	81.9651	1.91363	25.3453	-4.44864	151.823	0.00382987	0.99617	0.958039	0.0419615
	6	89	5	16.997	43	1.63347	40.1622	1.60382	7.19945	-15.7688	194.261	1	3.23947e-08	0.993854	0.00614572
	6	90	1	5.17714	0.202167	-0.69429	238.026	2.37662	222.841	3.07164	13.1874	1.11876e-06	0.999999	5.87888e-11	1
	6	90	2	7.58438	0.216756	-0.664029	229.664	2.36109	206.771	4.77931	7.59673	1.69606e-06	0.999998	1.16341e-09	1
	6	90	3	10.348	0.225093	-0.647638	215.476	2.3334	191.588	2.36635	22.2746	2.68392e-06	0.999997	2.41813e-08	1
	6	90	4	17.5823	0.239682	-0.620364	211.496	2.3253	187.111	-4.37886	52.885	3.62164e-06	0.999996	1.40525e-07	1
	6	90	5	27.3384	0.241766	-0.616604	199.911	2.30084	157.105	-5.99498	80.9004	4.97933e-06	0.999995	3.25172e-05	0.999967
	6	90	6	29.0662	30.9315	1.4904	40.1751	1.60396	5.91058	-3.15698	211.086	1	3.07225e-07	0.999643	0.000356911
	0.5	91	1	0.339731	0.220929	-0.655746	249.637	2.39731	226.033	2.82262	46.6125	1.15572e-06	0.999999	1.10229e-10	1
	0.5	91	2	1.23387	0.345984	-0.460944	247.312	2.39324	210.283	-4.10462	50.8192	6.01298e-06	0.999994	2.23013e-09	1
	0.5	91	3	3.94338	0.185497	-0.731662	250.909	2.39952	237.862	-1.98025	22.7419	6.37404e-07	0.999999	4.04992e-12	1
	0.5	91	4	9.68338	0.287625	-0.541173	173.343	2.23891	149.71	-13.0398	100.398	1.77428e-05	0.999982	0.000363314	0.999637
	0.5	91	5	12.841	0.172992	-0.761974	238.812	2.37806	200.14	-8.19263	81.6632	6.76687e-07	0.999999	4.89575e-08	1
	0.5	91	6	17.7598	0.639862	-0.193914	84.8819	1.92882	20.3688	-8.35825	230.229	0.00492791	0.995072	0.999731	0.00026902
	0.5	91	7	37.1245	0.227182	-0.643626	230.924	2.36347	200.876	-1.34776	68.5493	1.91968e-06	0.999998	2.21967e-08	1
	0.5	91	8	49.5528	0.694052	-0.158608	87.625	1.94263	25.2017	-14.9746	192.42	0.00578972	0.99421	0.991727	0.00827329
	0.5	91	9	58.7839	1.21511	0.0846163	69.7879	1.84378	34.1615	-15.9741	198.235	0.0828313	0.917169	0.992917	0.00708344
	0	92	1	7.73861	0.202167	-0.69429	215.286	2.33301	171.783	-1.8551	65.6685	1.92423e-06	0.999998	2.13799e-06	0.999998
	0	92	2	13.1763	0.170904	-0.767248	181.81	2.25962	119.353	-19.7683	157.121	2.94671e-06	0.999997	0.181873	0.818127
	0	92	3	33.2491	0.187577	-0.72682	243.541	2.38657	231.624	-2.3602	27.7306	7.78666e-07	0.999999	1.70734e-11	1
	0	92	4	43.2366	0.204251	-0.689836	237.685	2.376	224.37	2.78091	11.3996	1.16507e-06	0.999999	4.11677e-11	1
	10	93	1	8.59749	0.516892	-0.286601	96.1482	1.98294	28.8275	-14.3796	215.228	0.00154507	0.998455	0.997647	0.0023529
	10	93	2	10.638	0.277204	-0.557201	179.096	2.25309	134.543	-19.0571	131.929	1.34257e-05	0.999987	0.0186251	0.981375
	10	93	3	14.6918	0.235519	-0.627974	211.744	2.32581	191.169	-6.79308	68.4829	3.40116e-06	0.999997	1.32746e-07	1
	10	93	4	18.283	5.64412	0.751596	41.3792	1.61678	10.6188	-24.2589	219.045	0.994473	0.00552745	0.999313	0.000686833
	10	93	5	27.0639	32.9331	1.51763	40.8543	1.61124	7.79322	-23.5038	218.27	1	1.98406e-07	0.999179	0.000821255
	200	94	1	0	59.9977	1.77813	74.8068	1.87394	7.04383	-5.39091	124.547	1	1.14744e-09	0.789845	0.210155
	1	95	1	8.52246	0.256362	-0.591147	218.702	2.33985	206.914	-2.36022	32.794	3.80491e-06	0.999996	2.3577e-09	1
	1	95	2	35.0486	0.289709	-0.538037	185.918	2.26932	153.567	-5.24689	67.1078	1.29073e-05	0.999987	3.44083e-05	0.999966
	1	95	3	53.7192	0.248025	-0.605505	176.197	2.246	139.249	1.69334	24.3842	1.0251e-05	0.99999	6.92595e-05	0.999931
	1	95	4	59.2383	0.266783	-0.573842	205.755	2.31335	179.547	-3.3151	56.9908	5.92919e-06	0.999994	4.98131e-07	1
	0	96	1	14.6686	0.181325	-0.741543	224.397	2.35102	214.251	0.146741	16.0346	1.10229e-06	0.999999	3.56197e-10	1
	0	96	2	19.8061	0.235514	-0.627984	201.071	2.30335	182.552	-5.16503	53.7332	4.44614e-06	0.999996	3.26859e-07	1
	0	96	3	22.6135	0.531469	-0.274522	173.509	2.23932	113.93	11.152	43.7011	0.000156783	0.999843	0.00807553	0.991924
	0	96	4	29.854	0.723215	-0.140733	198.622	2.29803	129.664	-6.11096	109.645	0.000320982	0.999679	0.00287075	0.997129
	0	96	5	39.4392	0.164651	-0.783435	251.753	2.40097	218.993	-2.99342	54.9902	4.32584e-07	1	4.69052e-10	1
	0	96	6	40.1541	0.137557	-0.861518	210.04	2.3223	198.931	0.330976	11.8863	7.32372e-07	0.999999	5.72797e-09	1
	0	96	7	47.1174	0.16882	-0.772577	205.358	2.31251	161.447	-1.52247	72.1564	1.45921e-06	0.999999	1.24302e-05	0.999988
	0	96	8	53.9243	0.160483	-0.794571	157.955	2.19853	114.916	-14.4889	121.765	5.37021e-06	0.999995	0.0424636	0.957536
	0	96	9	54.6642	0.135473	-0.868149	219.56	2.34155	202.003	0.638359	45.4889	5.44078e-07	0.999999	7.76011e-09	1
	0	96	10	58.7555	0.277198	-0.55721	177.208	2.24848	113.48	12.9629	22.6162	1.41434e-05	0.999986	0.00513914	0.994861
	0	96	11	59.7892	0.156314	-0.806001	172.375	2.23648	158.084	-1.70504	25.7784	3.11506e-06	0.999997	6.51822e-06	0.999993
	6	97	1	0.402258	0.198003	-0.703329	232.673	2.36675	205.592	-6.15103	50.2352	1.18522e-06	0.999999	6.41845e-09	1
	6	97	2	2.99088	0.204256	-0.689826	209.314	2.3208	186.747	-8.49613	69.418	2.30895e-06	0.999998	3.51075e-07	1
	6	97	3	5.52115	0.214677	-0.668215	173.654	2.23968	131.278	-6.93934	82.7233	7.1556e-06	0.999993	0.000994446	0.999006
	6	97	4	8.18273	0.235519	-0.627974	201.267	2.30377	148.637	-8.05022	115.197	4.42416e-06	0.999996	0.000392343	0.999608
	6	97	5	13.1411	0.341815	-0.466208	146.262	2.16513	70.5234	-8.77692	160.969	6.90755e-05	0.999931	0.824414	0.175586
	6	97	6	16.0862	0.241772	-0.616594	181.958	2.25997	152.252	-10.3408	73.3773	8.05118e-06	0.999992	9.60286e-05	0.999904
	6	97	7	22.4785	0.268867	-0.570463	172.147	2.2359	154.996	-11.3696	109.65	1.48031e-05	0.999985	0.000175668	0.999824
	6	97	8	25.9967	0.258446	-0.587631	168.709	2.22714	115.151	-6.6664	106.503	1.44599e-05	0.999986	0.0116331	0.988367
	6	97	9	27.8184	0.20634	-0.685417	189.653	2.27796	172.039	-0.612296	53.7237	4.01845e-06	0.999996	1.38587e-06	0.999999
	6	97	10	34.8214	25.1755	1.40098	35.0552	1.54475	8.40624	-13.0177	165.927	0.999999	1.3237e-06	0.977038	0.0229624
	200	98	1	0	0.637763	-0.195341	198.887	2.29861	109.369	2.3393	121.111	0.000186194	0.999814	0.196257	0.803743
	200	98	2	7.82615	52.1715	1.71743	80.9733	1.90834	11.9173	-15.5826	180.912	1	3.17841e-09	0.988923	0.0110771
	1	99	1	12.2637	0.129223	-0.888661	259.477	2.4141	248.787	-4.87326	48.4297	1.78867e-07	1	9.70862e-13	1
	1	99	2	13.7456	0.210508	-0.676731	234.324	2.36982	213.675	1.00483	42.2563	1.38606e-06	0.999999	8.35956e-10	1
	1	99	3	14.8565	0.235519	-0.627974	245.764	2.39052	194.866	1.30574	60.2495	1.55736e-06	0.999998	5.15387e-08	1
	1	99	4	15.6485	0.310552	-0.507866	229.38	2.36056	139.054	-2.41314	126.184	5.83334e-06	0.999994	0.00342655	0.996573
	1	99	5	17.6056	0.421016	-0.375701	143.713	2.1575	77.4306	-8.48311	160.011	0.00014963	0.99985	0.751668	0.248332
	1	99	6	19.3272	4.08928	0.611647	47.6672	1.67822	14.8253	-5.524	200.157	0.970862	0.0291381	0.998233	0.00176682
	1	99	7	24.792	0.52106	-0.283112	91.1517	1.95976	36.1964	-31.2865	234.259	0.00194724	0.998053	0.999918	8.18226e-05
	1	99	8	29.1919	0.396006	-0.402299	125.06	2.09712	72.8946	0.0742098	141.15	0.000222916	0.999777	0.817204	0.182796
	1	99	9	36.8765	0.154234	-0.811821	261.58	2.41761	245.155	-1.20051	24.976	2.85182e-07	1	8.53054e-13	1
	1	99	10	40.7135	0.227182	-0.643626	193.682	2.28709	106.058	-4.0378	141.971	4.82051e-06	0.999995	0.166324	0.833676
	1	99	11	42.1058	0.179245	-0.746554	202.785	2.30703	187.854	-8.67859	65.4512	1.85704e-06	0.999998	2.77593e-07	1
	1	99	12	43.1125	0.587756	-0.230803	70.502	1.8482	30.7995	-14.0735	181.328	0.00727874	0.992721	0.983823	0.0161768
	1	99	13	45.4448	0.844117	-0.0735973	52.6965	1.72178	27.8991	-23.1404	201.598	0.0546232	0.945377	0.998015	0.00198497
	1	99	14	50.9055	0.562745	-0.249689	93.6568	1.97154	41.2471	-18.928	229.505	0.00225159	0.997748	0.998753	0.00124732
	1	99	15	53.3982	0.646114	-0.189691	83.8347	1.92342	45.2397	-20.7372	188.887	0.00531802	0.994682	0.991763	0.0082373
	1	99	16	59.5301	0.46687	-0.330804	49.8145	1.69736	35.6689	-26.7956	215.503	0.0133669	0.986633	0.999401	0.000598938
	0.5	100	1	1.22342	0.289703	-0.538047	208.505	2.31912	164.433	-5.35534	82.7192	7.3311e-06	0.999993	1.19623e-05	0.999988
	0.5	100	2	11.1692	0.195914	-0.707934	207.438	2.31689	191.117	-1.24545	29.3529	2.13488e-06	0.999998	3.39929e-08	1
	0.5	100	3	21.3817	0.270945	-0.567119	184.56	2.26614	165.884	-2.5574	56.4207	1.075e-05	0.999989	3.86139e-06	0.999996
	0.5	100	4	41.5359	0.19383	-0.712579	192.831	2.28518	162.23	-1.13752	46.12	3.05997e-06	0.999997	4.83033e-06	0.999995
	0.5	100	5	43.6076	0.210504	-0.676741	188.838	2.27609	173.067	-1.8704	27.1609	4.36249e-06	0.999996	6.84148e-07	0.999999
	0.5	100	6	51.515	1.64026	0.214913	79.5212	1.90048	29.9892	-12.3095	149.316	0.175943	0.824057	0.940782	0.0592178
	0.5	100	7	57.1152	0.254272	-0.594702	195.683	2.29155	177.488	0.145317	10.152	6.52892e-06	0.999993	2.30293e-07	1
	10	101	1	6.79254	0.264698	-0.577249	187.245	2.27241	128.428	-19.1424	124.499	9.27847e-06	0.999991	0.0336814	0.966319
	10	101	2	21.4156	38.5835	1.5864	30.8174	1.4888	6.96408	-20.629	201.153	1	9.7637e-08	0.997391	0.00260933
	0.5	102	1	6.16691	0.62732	-0.202511	212.933	2.32824	159.538	-1.24234	79.1549	0.000130971	0.999869	2.20808e-05	0.999978
	0.5	102	2	8.45527	0.223001	-0.651693	220.279	2.34297	210.983	0.396984	34.7594	2.31916e-06	0.999998	1.05063e-09	1
	0.5	102	3	12.3609	0.291777	-0.534949	180.791	2.25718	138.189	-1.91823	91.0966	1.51481e-05	0.999985	0.000560082	0.99944
	0.5	102	4	19.9659	0.489768	-0.310009	153.453	2.18597	94.5465	-0.709913	111.763	0.000193305	0.999807	0.12128	0.87872
	0.5	102	5	30.326	0.21258	-0.672477	195.004	2.29004	175.988	0.966431	10.5701	3.79557e-06	0.999996	2.76256e-07	1
	0.5	102	6	32.6853	0.331375	-0.47968	164.355	2.21578	116.199	-3.4198	63.2762	3.63726e-05	0.999964	0.00266499	0.997335
	0.5	102	7	35.43	0.416824	-0.380047	155.088	2.19058	89.317	-5.62716	112.151	0.000103588	0.999896	0.126315	0.873685
	0.5	102	8	43.0934	0.23759	-0.624172	203.582	2.30874	184.573	-0.741374	35.5168	4.28833e-06	0.999996	1.13883e-07	1
	0.5	102	9	45.7339	0.189655	-0.722036	196.069	2.29241	166.353	1.90599	56.2267	2.62612e-06	0.999997	4.02849e-06	0.999996
	0.5	102	10	53.3639	0.516862	-0.286626	188.859	2.27614	136.228	-1.64565	72.6974	9.80553e-05	0.999902	0.0003413	0.999659
	1	103	1	4.92297	0.264698	-0.577249	220.991	2.34437	186.157	-4.92924	58.3435	4.01925e-06	0.999996	1.96991e-07	1
	1	103	2	9.76883	0.168823	-0.772567	241.314	2.38258	218.265	-3.89687	49.8933	5.92886e-07	0.999999	4.76971e-10	1
	1	103	3	13.6205	0.458533	-0.33863	140.523	2.14775	56.9156	-0.972166	181.783	0.000221511	0.999778	0.994685	0.00531462
	1	103	4	16.453	0.210508	-0.676731	204.569	2.31084	170.593	5.29523	9.29267	2.86132e-06	0.999997	6.01371e-07	0.999999
	1	103	5	17.3346	0.204256	-0.689826	211.346	2.32499	177.257	-6.3592	54.1571	2.19274e-06	0.999998	8.95412e-07	0.999999
	1	103	6	18.4747	0.258446	-0.587631	216.308	2.33507	181.878	-4.95317	72.0553	4.13611e-06	0.999996	5.87664e-07	0.999999
	1	103	7	30.4132	1.32141	0.121037	47.7188	1.67869	23.9862	-8.6049	111.194	0.248816	0.751184	0.835838	0.164162
	1	103	8	36.0011	0.714894	-0.145758	92.417	1.96575	29.3489	-20.5242	214.666	0.00532643	0.994674	0.998051	0.00194879
	1	103	9	44.9925	0.26053	-0.584142	209.67	2.32154	180.66	-3.7948	30.1786	4.98022e-06	0.999995	2.61186e-07	1
	1	103	10	46.539	0.310552	-0.507866	210.987	2.32425	65.2567	-13.4769	187.599	8.80511e-06	0.999991	0.960526	0.0394739
	1	103	11	49.7279	10.2691	1.01153	47.8954	1.68029	14.0283	-18.9526	186.028	0.999743	0.000256861	0.993955	0.00604515
	200	104	1	6.32344	53.6742	1.72977	83.6292	1.92236	10.6001	-20.1597	218.894	1	2.44141e-09	0.99864	0.00136007
	10	105	1	2.28016	0.591924	-0.227734	246.501	2.39182	198.972	3.14171	85.7954	5.48284e-05	0.999945	1.52985e-07	1
	10	105	2	5.46279	0.200087	-0.698781	207.825	2.3177	195.891	0.790815	28.1116	2.25265e-06	0.999998	1.33033e-08	1
	10	105	3	6.67374	0.195919	-0.707924	234.216	2.36962	223.717	-0.932324	36.0854	1.10592e-06	0.999999	9.66534e-11	1
	10	105	4	13.1641	0.162571	-0.788958	233.005	2.36736	215.568	-6.10339	83.244	6.45745e-07	0.999999	2.89465e-09	1
	10	105	5	20.5652	0.216761	-0.664019	191.153	2.28138	174.803	-3.56951	58.4076	4.47006e-06	0.999996	1.10449e-06	0.999999
	10	105	6	22.2034	0.243856	-0.612866	198.281	2.29728	165.626	-1.1964	33.3476	5.33761e-06	0.999995	2.24218e-06	0.999998
	10	105	7	31.7159	0.223014	-0.651669	223.991	2.35023	189.061	-9.01518	64.515	2.12353e-06	0.999998	2.36239e-07	1
	10	105	8	39.6277	0.216761	-0.664019	197.079	2.29464	174.196	-3.85707	72.4146	3.81008e-06	0.999996	1.89535e-06	0.999998
	10	105	9	48.4419	0.237603	-0.624147	176.731	2.24731	160.973	-6.38932	61.3162	8.85017e-06	0.999991	1.20941e-05	0.999988
	10	105	10	57.6251	0.172992	-0.761974	209.364	2.3209	190.166	-2.7206	57.7087	1.40641e-06	0.999999	8.83429e-08	1
	0.5	106	1	2.09253	0.208419	-0.681062	221.898	2.34615	214.659	-1.6767	24.4454	1.79892e-06	0.999998	4.3913e-10	1
	0.5	106	2	9.54352	0.393912	-0.4046	247.309	2.39324	213.868	-2.85065	31.8413	9.93866e-06	0.99999	6.5406e-10	1
	0.5	106	3	10.819	0.431428	-0.365092	232.914	2.3672	187.867	-3.40742	71.2427	1.88595e-05	0.999981	2.09718e-07	1
	0.5	106	4	12.228	0.216756	-0.664029	231.51	2.36457	191.566	-3.25063	63.9634	1.6251e-06	0.999998	8.71663e-08	1
	0.5	106	5	13.0887	0.6065	-0.217169	214.223	2.33087	154.188	4.08687	88.1974	0.000110593	0.999889	0.00016619	0.999834
	0.5	106	6	13.9912	0.25844	-0.58764	221.629	2.34563	204.957	-4.87788	46.7432	3.65211e-06	0.999996	5.74756e-09	1
	0.5	106	7	17.5197	0.331387	-0.479665	183.979	2.26477	162.275	1.15559	36.8097	2.13749e-05	0.999979	3.70568e-06	0.999996
	0.5	106	8	21.4964	0.231345	-0.635739	204.679	2.31107	178.227	-2.29448	45.2727	3.83136e-06	0.999996	4.31381e-07	1
	0.5	106	9	23.295	0.300124	-0.5227	199.057	2.29898	159.41	-2.10089	57.3738	1.04029e-05	0.99999	1.00031e-05	0.99999
	0.5	106	10	24.3204	0.408502	-0.388806	155.332	2.19126	116.431	6.38899	17.032	9.58716e-05	0.999904	0.00104978	0.99895
	0.5	106	11	26.6839	0.575237	-0.240153	212.468	2.32729	89.6047	-0.989344	158.063	9.16035e-05	0.999908	0.814024	0.185976
	0.5	106	12	28.7035	0.270945	-0.567119	202.513	2.30645	187.368	1.48522	7.7003	6.76252e-06	0.999993	3.85164e-08	1
	0.5	106	13	30.4792	0.268861	-0.570472	192.09	2.2835	147.836	1.71981	67.2721	8.59031e-06	0.999991	8.06012e-05	0.999919
	0.5	106	14	37.1632	0.270945	-0.567119	182.917	2.26225	161.466	-5.29748	42.4639	1.12377e-05	0.999989	7.42143e-06	0.999993
	0.5	106	15	45.0561	0.29804	-0.525726	190.94	2.2809	164.929	-4.67966	44.145	1.2455e-05	0.999988	4.13352e-06	0.999996
	0.5	106	16	52.9844	0.241766	-0.616604	239.486	2.37928	192.83	1.91649	51.9323	1.95021e-06	0.999998	5.28906e-08	1
	0.5	106	17	55.4104	0.214672	-0.668225	211.477	2.32526	203.525	0.0127081	12.1461	2.55009e-06	0.999997	2.54322e-09	1
	0.5	106	18	57.0319	0.229261	-0.639669	207.405	2.31682	190.718	5.4343	11.9323	3.47513e-06	0.999997	2.38754e-08	1
	0.5	106	19	59.2619	0.268861	-0.570472	195.562	2.29128	184.135	0.636118	12.0469	7.85387e-06	0.999992	7.46307e-08	1
	200	107	1	3.40773	56.5892	1.75273	75.5256	1.87809	0.33202	-19.5139	256.549	1	1.80903e-09	0.999843	0.000156594
	10	108	1	1.65489	0.243856	-0.612866	233.306	2.36793	171.689	-1.7697	55.4603	2.30202e-06	0.999998	1.54334e-06	0.999998
	10	108	2	4.18515	0.229266	-0.63966	217.404	2.33727	174.316	-1.89783	94.1536	2.71708e-06	0.999997	5.3424e-06	0.999995
	10	108	3	15.3483	0.318889	-0.496361	172.479	2.23674	124.352	-6.44887	110.511	2.5496e-05	0.999975	0.00528688	0.994713
	10	108	4	19.1187	29.7421	1.47337	39.0096	1.59117	9.55676	0.981149	224.789	1	4.10089e-07	0.999985	1.52177e-05
	10	108	5	52.0456	7.95138	0.900442	42.9407	1.63287	9.91097	-27.2445	220.598	0.999001	0.00099869	0.9997	0.000299639
	0	109	1	5.06042	0.15423	-0.81183	239.01	2.37842	212.002	-10.7607	91.2854	4.79079e-07	1	1.09641e-08	1
	0	109	2	7.74486	0.325134	-0.487937	214.19	2.3308	78.5384	-3.14065	207.713	9.62899e-06	0.99999	0.997677	0.00232289
	0	109	3	9.32676	0.345976	-0.460954	174.477	2.24174	133.695	-15.0184	137.055	3.18184e-05	0.999968	0.00998896	0.990011
	0	109	4	18.4368	0.260524	-0.584152	239.552	2.3794	189.802	-5.92351	64.7777	2.51589e-06	0.999997	1.38856e-07	1
	0	109	5	20.9795	0.189662	-0.722021	207.17	2.31633	172.586	6.07768	13.3363	1.95096e-06	0.999998	5.1032e-07	0.999999
	0	109	6	32.5155	0.264693	-0.577258	185.195	2.26763	157.042	2.97178	37.939	9.80226e-06	0.99999	8.61444e-06	0.999991
	0	109	7	35.0019	0.325134	-0.487937	161.851	2.20911	102.835	-13.3719	108.965	3.67059e-05	0.999963	0.0817778	0.918222
	0	109	8	36.242	0.197998	-0.703338	222.842	2.348	200.009	3.73891	25.4	1.49799e-06	0.999999	6.39578e-09	1
	0	109	9	39.5226	0.120883	-0.917634	246.033	2.39099	231.752	-3.22562	32.4553	2.04764e-07	1	1.99385e-11	1
	0	109	10	42.5592	0.525217	-0.279662	180.728	2.25703	123.31	0.626267	106.34	0.00012601	0.999874	0.00899777	0.991002
	0	109	11	53.4012	0.160483	-0.794571	202.794	2.30706	164.159	-3.33286	67.7001	1.35731e-06	0.999999	7.09955e-06	0.999993
	0	109	12	56.6463	0.229261	-0.639669	198.195	2.29709	160.604	2.81267	36.8725	4.40089e-06	0.999996	4.96887e-06	0.999995
	6	110	1	5.36483	0.170908	-0.767238	195.519	2.29119	171.035	-7.64406	66.1598	1.98019e-06	0.999998	3.51451e-06	0.999996
	6	110	2	24.148	0.154234	-0.811821	201.431	2.30413	143.85	-0.0134661	84.6998	1.26374e-06	0.999999	0.000247631	0.999752
	6	110	3	24.5607	18.3788	1.26432	45.2464	1.65558	12.3592	-30.7881	227.523	0.999992	8.08709e-06	0.999922	7.78315e-05
	6	110	4	43.5731	9.81885	0.992061	44.2919	1.64632	12.2442	-30.1105	251.321	0.999677	0.000323148	0.999952	4.75066e-05
	6	110	5	53.6296	6.36735	0.803959	73.9209	1.86877	21.0103	-3.30004	224.208	0.994946	0.00505378	0.999901	9.87147e-05
	1	111	1	0.0896203	0.133388	-0.874882	277.12	2.44267	267.961	-4.03465	51.5733	1.32296e-07	1	2.38859e-12	1
	1	111	2	8.53477	0.175072	-0.756783	240.653	2.38139	231.633	1.59837	7.42354	6.72202e-07	0.999999	8.68944e-12	1
	1	111	3	10.0625	0.139641	-0.854987	243.769	2.38698	230.316	-1.27531	35.0903	3.21584e-07	1	2.53633e-11	1
	1	111	4	12.7177	0.177156	-0.751643	231.994	2.36548	221.244	-8.12155	68.734	8.54677e-07	0.999999	6.90032e-10	1
	1	111	5	20.7898	0.21884	-0.659873	208.749	2.31963	154.538	2.31229	97.4599	2.90063e-06	0.999997	0.000194467	0.999806
	1	111	6	24.977	0.21884	-0.659873	216.049	2.33455	191.264	2.40155	30.6276	2.41941e-06	0.999998	3.23711e-08	1
	1	111	7	41.4067	0.187577	-0.72682	222.983	2.34827	197.657	4.55478	8.71387	1.26453e-06	0.999999	6.23526e-09	1
	1	111	8	47.4071	0.175072	-0.756783	220.767	2.34394	192.065	-3.13917	35.9664	1.08628e-06	0.999999	3.81599e-08	1
	1	111	9	52.3383	0.210504	-0.676741	220.005	2.34243	181.102	7.88505	23.3081	1.94321e-06	0.999998	2.3023e-07	1
	1	111	10	53.595	0.195914	-0.707934	213.556	2.32951	201.568	1.94037	25.4963	1.82529e-06	0.999998	4.53378e-09	1
	1	111	11	57.8405	0.181325	-0.741543	218.062	2.33858	197.9	-3.97388	32.4453	1.29041e-06	0.999999	1.4257e-08	1
	0.5	112	1	4.63108	0.429344	-0.367195	201.343	2.30394	140.455	0.892225	86.4522	3.60052e-05	0.999964	0.000457417	0.999543
	0.5	112	2	21.0253	0.270945	-0.567119	188.337	2.27494	125.179	-2.24803	62.5424	9.72006e-06	0.99999	0.000922178	0.999078
	0.5	112	3	22.7677	0.225093	-0.647638	181.251	2.25828	171.144	1.1258	14.8085	6.60186e-06	0.999993	6.25782e-07	0.999999
	0.5	112	4	39.2433	0.245935	-0.60918	179.75	2.25467	160.269	-9.13032	85.8668	9.03e-06	0.999991	3.23919e-05	0.999968
	0.5	112	5	46.6088	0.243851	-0.612876	179.652	2.25443	166.299	-4.80827	41.6326	8.81953e-06	0.999991	3.31482e-06	0.999997
	10	113	1	19.2917	23.9396	1.37912	30.8587	1.48938	8.50993	-24.6174	193	0.999998	2.02335e-06	0.998765	0.00123539
	10	113	2	43.9962	16.0007	1.20414	39.4741	1.59631	7.23495	-9.44068	132.593	0.99998	1.9692e-05	0.922809	0.0771908
	6	114	1	12.2676	1.03168	0.0135432	109.817	2.04067	36.8922	0.470809	109.304	0.0119947	0.988005	0.791695	0.208305
	6	114	2	22.8469	5.51269	0.741364	62.0269	1.79258	19.4976	0.0938699	170.583	0.99085	0.00914996	0.995817	0.00418258
	6	114	3	28.8682	0.502291	-0.299045	107.02	2.02947	61.2039	-7.06555	85.3229	0.000924199	0.999076	0.35618	0.64382
	6	114	4	29.9728	5.20631	0.71653	56.9156	1.75523	12.4325	-14.4616	221.051	0.988813	0.0111873	0.998592	0.00140807
	6	114	5	37.4134	0.462691	-0.334709	101.372	2.00592	32.8798	-9.32728	152.223	0.000880354	0.99912	0.934451	0.0655495
	6	114	6	48.1386	11.857	1.07397	52.9007	1.72346	10.1983	-10.5549	207.487	0.999886	0.000114192	0.997493	0.0025069
	200	115	1	0.100044	59.8969	1.7774	86.0293	1.93465	16.5506	-16.8052	192.566	1	9.70986e-10	0.773123	0.226877
	6	116	1	1.0817	0.23343	-0.631844	217.256	2.33697	188.715	-0.451148	35.3449	2.89034e-06	0.999997	5.6194e-08	1
	6	116	2	12.2634	0.19383	-0.712579	202.792	2.30705	187.339	-4.58745	45.774	2.3356e-06	0.999998	1.18789e-07	1
	6	116	3	24.1662	0.273029	-0.563791	176.298	2.24625	156.198	-1.50025	49.0384	1.38194e-05	0.999986	1.24583e-05	0.999988
	6	116	4	27.8823	0.229261	-0.639669	211.249	2.32479	197.739	1.21791	14.6342	3.15751e-06	0.999997	7.06241e-09	1
	6	116	5	36.042	0.270945	-0.567119	183.096	2.26268	167.072	2.39402	6.94403	1.11834e-05	0.999989	1.00587e-06	0.999999
	6	116	6	51.8068	0.38766	-0.411549	156.837	2.19545	77.3977	-8.31249	115.51	7.66135e-05	0.999923	0.294732	0.705268
	6	116	7	54.0806	0.225093	-0.647638	196.329	2.29298	156.473	-4.03944	59.7585	4.36573e-06	0.999996	1.76245e-05	0.999982
	200	117	1	0	0.156318	-0.805991	209.813	2.32183	191.927	-3.48612	39.3202	1.04264e-06	0.999999	7.28577e-06	0.999993
	200	117	2	7.3928	52.6041	1.72102	84.3186	1.92592	4.61665	-25.7458	220.735	1	2.84251e-09	0.999553	0.000446845
	1	118	1	0	0.0458522	-1.33864	228.393	2.35868	222.074	3.30463	9.04443	4.24291e-08	1	2.03842e-08	1
	1	118	2	7.55312	0.195914	-0.707934	229.049	2.35993	194.996	-0.267877	58.6161	1.24874e-06	0.999999	4.18321e-08	1
	1	118	3	14.7561	0.71071	-0.148308	200.622	2.30238	136.559	-3.25058	96.04	0.000285912	0.999714	0.000782501	0.999217
	1	118	4	47.2841	0.923298	-0.0346583	84.7198	1.92798	28.8302	-10.6238	230.02	0.017761	0.982239	0.999518	0.000482192
	1	118	5	54.237	0.308461	-0.5108	168.362	2.22624	141.195	-2.21852	63.59	2.5629e-05	0.999974	0.00013816	0.999862
	10	119	1	3.09926	0.220929	-0.655746	191.896	2.28307	175.905	-5.45794	52.8906	4.64199e-06	0.999995	9.6458e-07	0.999999
	10	119	2	15.6922	0.210508	-0.676731	175.802	2.24502	157.794	-5.01756	72.0804	6.3403e-06	0.999994	2.14657e-05	0.999979
	10	119	3	34.2399	0.19175	-0.717264	179.405	2.25384	168.048	-2.46167	32.0288	4.35866e-06	0.999996	1.69299e-06	0.999998
	10	119	4	49.1985	0.214677	-0.668215	185.223	2.26769	171.227	1.21473	22.539	5.11827e-06	0.999995	6.96225e-07	0.999999
	10	119	5	55.3658	0.239688	-0.620354	182.791	2.26195	155.133	2.81384	20.908	7.65857e-06	0.999992	7.33698e-06	0.999993
	10	119	6	59.8323	0.164655	-0.783425	226.118	2.35433	198.37	-4.63988	55.0223	7.93723e-07	0.999999	2.21898e-08	1
	200	120	1	4.17672	47.7134	1.67864	85.5055	1.93199	4.91729	-18.5277	254.381	1	6.0926e-09	0.99983	0.000169671
	200	120	2	52.901	7.09459	0.850928	87.1293	1.94016	28.3929	-24.0806	234.198	0.99678	0.00321969	0.999549	0.00045127
	10	121	1	20.363	0.24594	-0.60917	188.922	2.27628	155.777	-4.48708	58.4866	7.01781e-06	0.999993	1.95662e-05	0.99998
	10	121	2	35.4196	0.283457	-0.547513	132.622	2.12262	77.8537	-5.91892	171.881	6.11632e-05	0.999939	0.898055	0.101945
	10	121	3	54.6717	5.32523	0.726339	42.196	1.62527	9.9779	-16.6993	162.053	0.99256	0.00743999	0.983647	0.0163533
	0.5	122	1	5.13754	0.28345	-0.547523	203.959	2.30954	107.894	-3.9335	137.674	7.59404e-06	0.999992	0.115892	0.884108
	0.5	122	2	5.80031	0.473112	-0.325036	230.066	2.36185	196.158	1.21911	38.5409	2.8894e-05	0.999971	1.72829e-08	1
	0.5	122	3	21.0045	0.162567	-0.788967	240.192	2.38056	220.768	-2.18147	44.3823	5.43696e-07	0.999999	2.29475e-10	1
	0.5	122	4	24.1641	0.164651	-0.783435	244.155	2.38767	231.843	-3.36808	40.4498	5.14744e-07	0.999999	2.41443e-11	1
	0.5	122	5	30.1416	0.156314	-0.806001	247.685	2.3939	234.019	1.70397	35.0956	4.06298e-07	1	1.23301e-11	1
	0.5	122	6	31.811	0.158399	-0.800248	258.398	2.41229	241.478	2.73562	20.1077	3.31568e-07	1	1.57558e-12	1
	0.5	122	7	32.5822	0.147978	-0.829804	258.104	2.41179	229.597	1.76814	26.7524	2.72469e-07	1	2.23691e-11	1
	0.5	122	8	34.9269	0.137557	-0.861518	260.769	2.41626	248.286	-0.141431	19.6008	2.07434e-07	1	3.56738e-13	1
	0	123	1	1.40686	0.239688	-0.620354	232.483	2.36639	183.464	7.83681	38.2477	2.21304e-06	0.999998	3.08906e-07	1
	0	123	2	5.85046	0.373079	-0.428199	241.809	2.38347	179.723	-4.2936	53.4481	8.94984e-06	0.999991	4.71974e-07	1
	0	123	3	7.65333	0.254277	-0.594692	223.218	2.34873	172.75	3.80987	51.6095	3.33294e-06	0.999997	1.57267e-06	0.999998
	0	123	4	11.3133	0.210508	-0.676731	231.982	2.36545	205.154	1.64686	20.2984	1.46297e-06	0.999999	2.05895e-09	1
	0	123	5	18.8728	0.204256	-0.689826	198.226	2.29716	137.327	-1.7947	93.3521	3.08532e-06	0.999997	0.000695758	0.999304
	0	123	6	24.0229	0.225098	-0.647629	215.225	2.33289	170.399	1.30225	54.047	2.70057e-06	0.999997	1.93919e-06	0.999998
	0	123	7	41.3617	0.162571	-0.788958	223.815	2.34989	210.132	-1.79313	26.2423	8.10192e-07	0.999999	1.08492e-09	1
	0	123	8	43.3501	0.231351	-0.635729	179.361	2.25373	137.09	-11.5481	80.5165	7.56916e-06	0.999992	0.000984713	0.999015
	0	123	9	44.6986	0.362658	-0.440503	151.879	2.1815	66.8524	-2.15336	163.813	7.06571e-05	0.999929	0.950375	0.0496249
	0	123	10	49.7029	0.233435	-0.631834	212.215	2.32678	194.452	-3.20825	35.7117	3.26702e-06	0.999997	2.5273e-08	1
	0	123	11	50.4011	0.193834	-0.712569	197.438	2.29543	162.93	7.74919	12.4489	2.69672e-06	0.999997	2.54763e-06	0.999997
	0	123	12	54.0839	0.229266	-0.63966	174.108	2.24082	120.826	0.371659	68.1457	8.57434e-06	0.999991	0.00183949	0.998161
	6	124	1	1.28386	0.164651	-0.783435	253.243	2.40354	238.493	1.75267	14.7134	4.1831e-07	1	2.46515e-12	1
	6	124	2	1.94455	0.256356	-0.591157	256.448	2.409	211.634	-1.25198	57.8356	1.66902e-06	0.999998	2.07334e-09	1
	6	124	3	32.8031	0.220924	-0.655756	191.47	2.2821	150.724	-5.14875	100.37	4.69577e-06	0.999995	0.000155542	0.999844
	6	124	4	33.9932	0.185493	-0.731672	242.919	2.38546	227.841	-1.50565	28.2534	7.62638e-07	0.999999	3.51336e-11	1
	6	124	5	55.2332	0.197998	-0.703338	228.864	2.35958	216.549	-0.225181	26.447	1.29635e-06	0.999999	2.93015e-10	1
	6	124	6	59.5558	0.279282	-0.553957	154.164	2.18798	119.458	2.24369	122.929	2.85353e-05	0.999971	0.0557853	0.944215
	200	125	1	0	59.9977	1.77813	80.9847	1.9084	1.30565	4.33345	71.2224	1	1.03406e-09	0.893627	0.106373
	10	126	1	1.22137	0.212593	-0.672452	233.819	2.36888	206.213	-2.31276	34.3446	1.44745e-06	0.999999	2.76299e-09	1
	10	126	2	7.98265	0.287625	-0.541173	228.498	2.35888	167.848	-1.73833	88.3722	4.52382e-06	0.999995	1.02402e-05	0.99999
	10	126	3	11.4154	0.177161	-0.751633	221.943	2.34624	209.847	-3.3231	34.767	1.09257e-06	0.999999	1.55015e-09	1
	10	126	4	19.3084	0.614852	-0.21123	93.5341	1.97097	34.3328	-13.3261	219.932	0.00303737	0.996963	0.998275	0.00172521
	10	126	5	31.991	0.0812855	-1.08999	77.9837	1.892	42.3695	-25.9841	184.573	8.25219e-05	0.999917	0.998065	0.00193483
	10	126	6	35.5426	24.4544	1.38836	41.953	1.62276	9.35139	-24.8334	202.3	0.999999	1.37967e-06	0.999037	0.000963164
	0.5	127	1	6.87575	0.468943	-0.32888	125.078	2.09718	46.1499	2.615	139.832	0.000389883	0.99961	0.964773	0.0352266
	0.5	127	2	8.44723	0.400165	-0.397761	161.816	2.20902	94.2171	-10.2334	146.458	7.43744e-05	0.999926	0.304599	0.695401
	0.5	127	3	27.2654	0.766983	-0.115214	82.6151	1.91706	27.1053	-11.1556	222.319	0.00997729	0.990023	0.999013	0.000986748
	0.5	127	4	33.9473	0.312629	-0.504971	157.179	2.19639	80.246	-1.14801	120.22	3.70861e-05	0.999963	0.370512	0.629488
	0.5	127	5	38.7222	0.58149	-0.235458	101.157	2.005	52.3138	-22.6599	167.017	0.00187838	0.998122	0.988458	0.0115418
	0.5	127	6	56.1857	0.55648	-0.254551	106.378	2.02685	33.334	-12.1744	175.191	0.00133458	0.998665	0.976007	0.0239929
	0.5	127	7	58.2657	0.29804	-0.525726	166.773	2.22212	135.798	-5.24958	60.4876	2.39864e-05	0.999976	0.000307813	0.999692
	0	128	1	1.82163	0.302215	-0.519684	213.382	2.32916	179.237	5.01335	44.5027	7.57059e-06	0.999992	4.96503e-07	1
	0	128	2	5.42111	0.212593	-0.672452	189.691	2.27805	171.273	-6.2624	48.867	4.3886e-06	0.999996	2.09205e-06	0.999998
	0	128	3	9.01018	0.225098	-0.647628	213.804	2.33002	198.037	-0.390031	31.7166	2.79623e-06	0.999997	1.02455e-08	1
	0	128	4	12.3241	0.335563	-0.474226	172.457	2.23668	126.813	-6.2645	87.3711	3.02768e-05	0.99997	0.00178162	0.998218
	0	128	5	16.9345	0.283457	-0.547513	190.562	2.28004	121.524	-4.63558	106.265	1.06357e-05	0.999989	0.00611813	0.993882
	0	128	6	23.4811	0.26053	-0.584142	191.873	2.28301	175.042	0.629921	12.9669	7.7993e-06	0.999992	3.38917e-07	1
	0	128	7	26.1739	0.277204	-0.5572	189.239	2.27701	157.615	4.52266	30.0841	1.02278e-05	0.99999	6.92422e-06	0.999993
	0	128	8	32.6872	0.256362	-0.591147	194.493	2.2889	181.79	-0.231761	24.4804	6.91409e-06	0.999993	1.40699e-07	1
	0	128	9	50.6867	0.337647	-0.471537	138.058	2.14006	108.385	0.845965	24.1527	8.64492e-05	0.999914	0.00274979	0.99725
	0	128	10	55.097	0.225098	-0.647628	167.095	2.22296	150.214	1.98927	31.8322	1.00176e-05	0.99999	1.83383e-05	0.999982
	0	128	11	59.1737	0.287625	-0.541173	166.209	2.22065	135.407	-2.07882	40.4379	2.17549e-05	0.999978	0.000175913	0.999824
	1	129	1	1.17551	0.181329	-0.741532	232.221	2.3659	199.255	6.71255	11.3193	9.12312e-07	0.999999	5.85157e-09	1
	1	129	2	2.1426	0.204256	-0.689826	214.926	2.33229	187.538	-8.46187	85.291	2.00419e-06	0.999998	4.69046e-07	1
	1	129	3	3.32437	0.548156	-0.261096	251.063	2.39978	168.05	-1.31741	93.128	3.62664e-05	0.999964	1.32955e-05	0.999987
	1	129	4	5.99011	0.166739	-0.777962	258.852	2.41305	242.691	-2.07857	33.998	3.83806e-07	1	1.94346e-12	1
	1	129	5	7.99724	0.158402	-0.800238	248.403	2.39516	235.819	-4.54995	38.7872	4.15671e-07	1	1.13663e-11	1
	1	129	6	13.1203	0.223014	-0.651668	166.815	2.22223	139.05	-3.11037	53.7147	9.83284e-06	0.99999	0.000149111	0.999851
	1	129	7	13.7018	0.223014	-0.651668	200.337	2.30176	180.186	-1.99941	77.8168	3.81779e-06	0.999996	9.67662e-07	0.999999
	1	129	8	17.4264	0.227182	-0.643625	205.826	2.3135	190.83	1.64979	14.9684	3.51358e-06	0.999996	2.36166e-08	1
	1	129	9	17.9766	0.166739	-0.777962	230.533	2.36273	210.891	-1.26026	41.7477	7.3878e-07	0.999999	1.34309e-09	1
	1	129	10	18.6352	0.195919	-0.707924	249.739	2.39749	227.23	-0.830103	27.5742	7.7831e-07	0.999999	3.77282e-11	1
	1	129	11	19.917	0.212593	-0.672452	238.262	2.37705	218.679	-2.69591	29.0505	1.30824e-06	0.999999	2.4126e-10	1
	1	129	12	20.857	0.187582	-0.726809	245.61	2.39025	217.895	4.61575	10.7069	7.43159e-07	0.999999	1.52455e-10	1
	1	129	13	22.1013	0.179245	-0.746553	259.715	2.4145	244.818	1.19371	38.295	4.71834e-07	1	1.44525e-12	1
	1	129	14	26.8346	0.181329	-0.741532	231.823	2.36516	206.933	-2.15617	52.9981	9.21009e-07	0.999999	4.04849e-09	1
	1	129	15	35.2154	0.147981	-0.829793	231.02	2.36365	217.596	-2.63394	28.9034	5.17102e-07	0.999999	2.9524e-10	1
	1	129	16	37.1808	0.189666	-0.72201	232.399	2.36623	206.232	1.4101	40.6068	1.04303e-06	0.999999	3.14381e-09	1
	1	129	17	40.403	0.229267	-0.639659	211.806	2.32594	179.071	4.73058	67.6676	3.11461e-06	0.999997	1.61373e-06	0.999998
	0.5	130	1	6.9612	0.16882	-0.772577	258.952	2.41322	239.544	-1.60014	39.2838	3.97879e-07	1	4.36948e-12	1
	0.5	130	2	7.53019	0.537722	-0.269442	252.633	2.40249	156.795	-4.04464	127.726	3.24819e-05	0.999968	0.000350007	0.99965
	0.5	130	3	11.9341	0.164651	-0.783435	272.393	2.4352	248.132	-0.460523	49.3766	2.75891e-07	1	1.0631e-12	1
	0.5	130	4	12.7782	0.179241	-0.746564	246.951	2.39261	234.852	3.11944	11.4262	6.25533e-07	0.999999	4.87172e-12	1
	0.5	130	5	26.9153	0.212588	-0.672462	205.055	2.31187	183.894	0.217339	29.8434	2.91242e-06	0.999997	1.08394e-07	1
	0.5	130	6	32.1216	0.266777	-0.573852	192.767	2.28503	162.201	-6.62727	81.9383	8.2287e-06	0.999992	1.71469e-05	0.999983
	0.5	130	7	38.172	0.237598	-0.624157	197.043	2.29456	96.0697	-10.5006	104.225	5.07469e-06	0.999995	0.0831971	0.916803
	0.5	130	8	42.5446	0.204251	-0.689836	218.647	2.33974	187.531	7.69857	8.61239	1.82779e-06	0.999998	4.54953e-08	1
	0.5	130	9	46.4296	0.237598	-0.624157	184.835	2.26678	165.288	1.75384	26.5769	7.04326e-06	0.999993	1.86042e-06	0.999998
	0.5	130	10	53.6075	0.162567	-0.788967	215.986	2.33442	194.889	5.06685	25.8729	9.89458e-07	0.999999	1.77263e-08	1
	0.5	130	11	54.4621	0.156314	-0.806001	253	2.40312	208.106	2.8802	46.0262	3.59719e-07	1	3.12582e-09	1
	200	131	1	0	59.997	1.77813	81.6238	1.91182	0.201698	-3.26551	141.258	1	1.02376e-09	0.925733	0.0742669
	10	132	1	3.44726	0.19383	-0.712579	231.948	2.36539	200.369	-8.13872	71.353	1.12777e-06	0.999999	3.44989e-08	1
	10	132	2	4.035	1.13172	0.0537378	157.838	2.19821	56.1849	-19.0153	307.708	0.00547961	0.99452	0.999998	1.64394e-06
	10	132	3	5.29802	0.158399	-0.800248	284.089	2.45345	255.297	-9.13807	85.0297	1.91897e-07	1	1.27863e-12	1
	10	132	4	22.3488	0.256356	-0.591157	170.859	2.23264	159.322	-5.51895	96.0891	1.32416e-05	0.999987	4.11383e-05	0.999959
	10	132	5	42.7447	7.68234	0.885493	32.238	1.50837	10.3691	-26.453	182.034	0.998942	0.00105791	0.999247	0.000752538
	10	132	6	55.3082	4.68943	0.67112	27.3736	1.43733	15.1175	-33.632	253.88	0.990785	0.0092155	0.999986	1.3862e-05
	6	133	1	4.08095	0.218845	-0.659862	252.08	2.40154	196.281	-8.77302	114.373	1.06267e-06	0.999999	3.78688e-07	1
	6	133	2	12.9411	1.13383	0.0545472	154.842	2.18989	49.8503	-37.1892	290.194	0.00588947	0.994111	0.999998	1.73639e-06
	6	133	3	15.2379	11.2091	1.04957	32.7222	1.51484	10.0518	-35.1796	216.779	0.999848	0.000151893	0.999988	1.18646e-05
	6	133	4	30.605	0.183413	-0.736569	256.496	2.40908	220.718	-0.0171376	74.4131	5.4407e-07	0.999999	9.41623e-10	1
	6	133	5	49.6571	0.218845	-0.659862	225.642	2.35342	160.578	4.62635	101.491	1.92189e-06	0.999998	0.000213017	0.999787
	0	134	1	0.325134	0.102125	-0.990866	258.687	2.41277	230.469	-3.38628	59.9232	9.7009e-08	1	6.06454e-11	1
	0	134	2	2.1488	0.0979571	-1.00896	265.842	2.42462	238.539	8.25657	45.6658	7.35925e-08	1	2.44555e-11	1
	0	134	3	3.35347	0.197998	-0.703338	259.901	2.41481	242.073	-2.87171	35.5231	6.4672e-07	0.999999	2.42542e-12	1
	0	134	4	9.24131	0.191746	-0.717274	247.045	2.39278	218.684	-3.53475	39.8172	7.71312e-07	0.999999	3.28276e-10	1
	0	134	5	10.0187	0.34806	-0.458346	189.075	2.27663	128.428	-3.42441	145.63	2.22859e-05	0.999978	0.0340957	0.965904
	0	134	6	10.9941	0.208419	-0.681062	274.239	2.43813	252.586	3.24211	57.5742	5.70778e-07	0.999999	9.4007e-13	1
	0	134	7	11.7569	0.15423	-0.81183	289.306	2.46136	278.64	0.242652	16.1309	1.5886e-07	1	2.84086e-16	1
	0	134	8	12.5927	0.156314	-0.806001	265.418	2.42393	247.937	2.78876	47.2363	2.73003e-07	1	1.31191e-12	1
	0	134	9	14.1142	0.150062	-0.82373	286.46	2.45706	247.428	7.85864	6.83702	1.54653e-07	1	4.21653e-13	1
	0	134	10	21.3213	0.223009	-0.651678	251.139	2.39991	213.961	1.07539	56.266	1.15475e-06	0.999999	1.44478e-09	1
	0	134	11	22.2133	0.179241	-0.746564	254.558	2.40579	241.892	2.14366	13.299	5.27936e-07	0.999999	1.15005e-12	1
	0	134	12	24.3496	0.183409	-0.736579	247.908	2.39429	218.416	-3.60388	37.6928	6.57664e-07	0.999999	3.31287e-10	1
	0	134	13	27.0695	0.141725	-0.848553	276.486	2.44167	255.845	4.04758	10.9505	1.60277e-07	1	5.28985e-14	1
	0	134	14	30.1645	0.166735	-0.777972	290.238	2.46275	273.959	1.4835	13.1072	1.99379e-07	1	7.89161e-16	1
	0	134	15	40.6084	0.25844	-0.58764	206.745	2.31544	167.9	-8.67364	80.8523	5.20796e-06	0.999995	8.94386e-06	0.999991
	0	134	16	42.2153	0.281366	-0.550728	169.453	2.22905	122.277	-3.59102	71.3768	1.84668e-05	0.999982	0.0016698	0.99833
	0	134	17	43.9473	0.152146	-0.817739	244.539	2.38835	212.581	-6.1787	56.6955	4.03858e-07	1	2.05314e-09	1
	0	134	18	48.2678	0.187577	-0.72682	259.904	2.41481	241.36	-0.125102	25.1316	5.42967e-07	0.999999	1.85425e-12	1
	0	134	19	50.6938	0.137557	-0.861518	259.934	2.41486	246.294	-1.77552	29.7147	2.11393e-07	1	7.817e-13	1
	0	134	20	53.7347	0.166735	-0.777972	246.507	2.39183	235.736	1.84754	6.88887	5.06364e-07	0.999999	3.61835e-12	1
	0	134	21	54.8205	0.170904	-0.767248	237.623	2.37589	220.21	-0.776777	32.7056	6.70823e-07	0.999999	1.73323e-10	1
	0	134	22	59.8559	0.139641	-0.854987	230.57	2.3628	220.755	1.60506	6.4299	4.44697e-07	1	7.73817e-11	1
	1	135	1	1.93835	0.170908	-0.767238	273.628	2.43716	248.612	-8.18004	73.0523	3.02234e-07	1	3.092e-12	1
	1	135	2	4.45194	0.150065	-0.823719	301.402	2.47915	268.146	-0.684863	45.6749	1.14715e-07	1	1.05016e-14	1
	1	135	3	7.22398	0.131307	-0.881711	285.833	2.45611	235.742	7.86993	28.5563	1.04995e-07	1	1.40532e-11	1
	1	135	4	7.75338	0.141728	-0.848543	293.89	2.46819	281.16	-2.22577	49.2344	1.11681e-07	1	5.5478e-16	1
	1	135	5	13.3433	0.141728	-0.848543	288.127	2.45958	279.273	-1.31967	24.9135	1.25602e-07	1	3.37731e-16	1
	1	135	6	23.035	0.202172	-0.69428	238.013	2.3766	219.943	-2.42889	43.8831	1.11917e-06	0.999999	2.67546e-10	1
	1	135	7	25.186	0.175076	-0.756772	238.934	2.37828	164.802	-3.73198	102.529	6.99727e-07	0.999999	2.79049e-05	0.999972
	1	135	8	26.547	0.170908	-0.767238	238.435	2.37737	218.521	-1.02306	32.2419	6.5816e-07	0.999999	2.39528e-10	1
	1	135	9	35.7052	0.198003	-0.703328	230.106	2.36193	210.038	-2.28417	28.9088	1.25891e-06	0.999999	1.21148e-09	1
	1	135	10	36.5034	0.15215	-0.817729	269.712	2.4309	239.095	2.58975	41.157	2.2925e-07	1	6.036e-12	1
	1	135	11	37.4038	0.160487	-0.794561	262.864	2.41973	227.777	2.24478	38.6158	3.12694e-07	1	5.16244e-11	1
	1	135	12	38.3313	0.129223	-0.88866	276.614	2.44187	268.042	-0.43799	15.5662	1.22025e-07	1	3.6315e-15	1
	1	135	13	43.7795	0.443944	-0.352672	102.676	2.01147	70.665	-14.2046	148.146	0.00073393	0.999266	0.759564	0.240436
	6	136	1	25.894	0.254272	-0.594702	162.219	2.2101	82.6896	-14.7199	101.266	1.67111e-05	0.999983	0.392895	0.607105
	6	136	2	31.5859	0.779488	-0.10819	103.09	2.01322	29.655	-17.7763	194.646	0.00497724	0.995023	0.993366	0.00663422
	6	136	3	34.31	0.546059	-0.262761	97.6717	1.98977	62.2168	-16.1839	163.683	0.00173906	0.998261	0.917763	0.082237
	0.5	137	1	0.88997	0.710726	-0.148298	212.994	2.32837	157.908	-4.58905	86.0413	0.000224997	0.999775	3.32065e-05	0.999967
	0.5	137	2	4.49154	0.179245	-0.746554	221.816	2.34599	192.178	3.48844	28.5523	1.13494e-06	0.999999	2.73455e-08	1
	0.5	137	3	5.64412	1.43604	0.157167	201.881	2.3051	131.019	-5.07117	97.9964	0.00770546	0.992295	0.00153329	0.998467
	0.5	137	4	9.0456	0.400174	-0.397751	214.218	2.33086	122.373	-15.7402	130.083	2.07279e-05	0.999979	0.031109	0.968891
	0.5	137	5	17.5826	0.264698	-0.577249	194.293	2.28846	164.635	4.56559	33.2309	7.71048e-06	0.999992	2.78092e-06	0.999997
	0.5	137	6	23.7895	0.220929	-0.655746	187.711	2.27349	177.302	2.03562	11.5891	5.20597e-06	0.999995	2.13542e-07	1
	0.5	137	7	25.9134	0.223014	-0.651669	192.367	2.28413	181.09	-2.19592	37.511	4.71695e-06	0.999995	2.28546e-07	1
	0.5	137	8	27.3807	0.170908	-0.767238	204.45	2.31059	158.172	11.7422	18.3342	1.54861e-06	0.999998	1.28998e-05	0.999987
	0.5	137	9	29.8046	0.227182	-0.643626	185.977	2.26946	168.182	-1.7099	47.1328	5.94593e-06	0.999994	2.08633e-06	0.999998
	0.5	137	10	31.3345	0.195919	-0.707924	182.178	2.2605	135.458	3.43096	49.8074	4.27208e-06	0.999996	0.000226213	0.999774
	0.5	137	11	32.7142	0.248025	-0.605505	175.115	2.24332	148.809	-3.11123	31.6027	1.05736e-05	0.999989	3.04489e-05	0.99997
	0.5	137	12	35.7822	0.614851	-0.21123	196.955	2.29437	120.037	-4.1021	98.0078	0.000166226	0.999834	0.00512377	0.994876
	0.5	137	13	37.2933	0.214677	-0.668215	178.29	2.25113	163.461	-3.88648	41.9828	6.24212e-06	0.999994	4.53502e-06	0.999995
	0.5	137	14	38.4688	0.225098	-0.647629	213.414	2.32922	187.354	-4.77212	39.1349	2.82318e-06	0.999997	1.08834e-07	1
	0.5	137	15	41.7077	0.227182	-0.643626	172.821	2.2376	131.059	-0.985258	56.2122	8.66645e-06	0.999991	0.000387048	0.999613
	0.5	137	16	54.4362	0.143813	-0.842203	210.714	2.32369	189.097	3.11584	14.9235	8.09752e-07	0.999999	3.12729e-08	1
	0.5	137	17	55.8139	0.337647	-0.471537	147.382	2.16845	67.3705	-3.33948	141.455	6.41106e-05	0.999936	0.759345	0.240655
	1	138	1	3.18048	0.243851	-0.612876	204.713	2.31114	179.108	2.37374	7.27027	4.53092e-06	0.999995	1.4722e-07	1
	1	138	2	4.78322	0.245935	-0.60918	209.366	2.32091	196.606	0.0806112	15.8783	4.14947e-06	0.999996	9.39636e-09	1
	1	138	3	7.66983	0.256356	-0.591157	218.097	2.33865	188.041	1.95297	42.8897	3.85894e-06	0.999996	8.2278e-08	1
	1	138	4	11.5214	0.220924	-0.655756	208.078	2.31823	196.637	-0.729404	22.2891	3.03932e-06	0.999997	1.09868e-08	1
	1	138	5	12.5927	0.241766	-0.616604	216.186	2.33483	204.403	-1.42438	18.0483	3.32529e-06	0.999997	2.67027e-09	1
	1	138	6	15.0958	0.189662	-0.722021	227.16	2.35633	193.363	-1.22962	48.7123	1.18169e-06	0.999999	3.77735e-08	1
	1	138	7	18.6452	0.204251	-0.689836	193.947	2.28768	159.443	0.916013	33.3244	3.46357e-06	0.999997	5.15599e-06	0.999995
	1	138	8	26.2587	0.152146	-0.817739	209.299	2.32077	199.141	-0.532331	19.4494	9.80967e-07	0.999999	6.59823e-09	1
	1	138	9	37.826	0.25844	-0.58764	193.158	2.28591	138.713	7.02704	15.1846	7.34787e-06	0.999993	7.31864e-05	0.999927
	1	138	10	39.0661	0.245935	-0.60918	202.373	2.30615	180.001	1.13438	35.5615	4.94006e-06	0.999995	2.34499e-07	1
	1	138	11	43.3554	0.28345	-0.547523	176.028	2.24558	148.855	-6.51475	60.4115	1.57029e-05	0.999984	6.61728e-05	0.999934
	1	138	12	46.4671	0.733636	-0.134519	55.7493	1.74624	25.8276	-1.85228	125.768	0.0306355	0.969364	0.891453	0.108547
	1	138	13	49.4829	0.350144	-0.455753	122.645	2.08865	45.5543	-11.4859	143.543	0.000164878	0.999835	0.87926	0.12074
	1	138	14	58.2803	0.227177	-0.643636	163.548	2.21365	126.108	-5.88123	74.3768	1.14778e-05	0.999989	0.00135513	0.998645
	0	139	1	0.562745	0.158402	-0.800239	219.403	2.34124	199.88	-2.08784	45.6736	8.41279e-07	0.999999	1.1348e-08	1
	0	139	2	0.931655	0.143813	-0.842203	236.9	2.37456	206.73	6.96932	33.4121	4.12633e-07	1	3.94841e-09	1
	0	139	3	1.50691	0.377247	-0.423374	167.141	2.22308	102.043	-3.76262	102.731	5.23054e-05	0.999948	0.0346473	0.965353
	0	139	4	8.92472	0.19175	-0.717264	217.733	2.33792	202.533	-1.46421	58.6771	1.53957e-06	0.999998	1.09433e-08	1
	0	139	5	10.9339	0.814938	-0.0888755	231.9	2.3653	168.248	2.482	72.6118	0.000298135	0.999702	7.07659e-06	0.999993
	0	139	6	21.6678	0.172992	-0.761974	194.014	2.28783	181.74	2.36079	9.07325	2.13733e-06	0.999998	9.77654e-08	1
	0	139	7	32.3745	0.404343	-0.393251	195.805	2.29182	124.901	1.65621	71.6273	3.26072e-05	0.999967	0.00150005	0.9985
	0	139	8	46.7599	0.212592	-0.672452	230.038	2.3618	215.07	3.58434	6.02612	1.57967e-06	0.999998	2.25643e-10	1
	0	139	9	53.8568	0.375163	-0.42578	192.848	2.28522	108.42	-3.46111	98.8721	2.65638e-05	0.999973	0.0169859	0.983014
	0	139	10	54.3882	0.264698	-0.577249	220.683	2.34377	164.971	-14.3463	178.353	4.04795e-06	0.999996	0.00176448	0.998236
	10	140	1	2.21758	0.183409	-0.736579	263.517	2.42081	218.906	11.2587	21.8401	4.67819e-07	1	5.87767e-10	1
	10	140	2	2.84076	0.220924	-0.655756	217.73	2.33792	180.672	-11.4723	108.26	2.39342e-06	0.999998	4.19989e-06	0.999996
	10	140	3	8.79321	0.225093	-0.647638	208.562	2.31924	176.298	-4.02708	77.8508	3.18472e-06	0.999997	1.68291e-06	0.999998
	10	140	4	10.4606	0.291787	-0.534934	156.898	2.19562	97.3488	-5.3039	124.147	3.00446e-05	0.99997	0.115337	0.884663
	10	140	5	13.0804	0.266777	-0.573852	178.381	2.25135	133.932	-0.0394918	102.681	1.2112e-05	0.999988	0.00207489	0.997925
	10	140	6	13.7515	0.231345	-0.635739	198.014	2.2967	174.317	-10.1011	103.373	4.54905e-06	0.999995	7.99661e-06	0.999992
	10	140	7	22.1154	0.260524	-0.584152	172.022	2.23558	150.796	-9.95876	104.435	1.34598e-05	0.999987	0.000220446	0.99978
	10	140	8	23.6869	36.3108	1.56004	39.2245	1.59356	8.25427	-20.8169	226.499	1	1.07259e-07	0.999129	0.000871087
	200	141	1	2.64698	57.3499	1.75853	81.269	1.90993	12.8329	-0.688011	238.144	1	1.48286e-09	0.999993	7.02204e-06
	200	142	1	0.658605	59.337	1.77333	70.0092	1.84516	7.88175	-22.9874	306.293	1	1.37075e-09	0.999997	2.7446e-06
	1	143	1	0.529397	0.19175	-0.717264	239.437	2.37919	210.765	3.67792	59.4001	9.16196e-07	0.999999	4.24307e-09	1
	1	143	2	8.50995	0.500218	-0.300841	255.714	2.40775	187.667	5.99671	111.004	2.26066e-05	0.999977	1.62676e-05	0.999984
	1	143	3	9.93349	0.141728	-0.848543	270.287	2.43182	244.901	-4.37283	43.8451	1.83207e-07	1	1.87733e-12	1
	1	143	4	10.3024	0.15215	-0.817729	275.999	2.44091	265.786	-6.30107	51.8675	2.00493e-07	1	2.76582e-14	1
	1	143	5	12.8285	0.239688	-0.620354	174.909	2.24281	142.217	-13.2564	123.139	9.57907e-06	0.99999	0.00178634	0.998214
	1	143	6	23.9083	0.141728	-0.848543	257.049	2.41002	225.545	-4.98549	43.7531	2.4603e-07	1	1.08027e-10	1
	1	143	7	49.5716	0.239688	-0.620354	171.804	2.23503	126.763	-17.7767	126.787	1.04871e-05	0.99999	0.0287384	0.971262
	1	143	8	52.0268	0.327226	-0.485153	136.108	2.13388	80.4588	-16.2153	178.535	8.36219e-05	0.999916	0.877076	0.122924
	1	143	9	54.6196	0.200087	-0.698781	178.15	2.25079	149.013	-16.7917	113.47	5.10747e-06	0.999995	0.00121515	0.998785
	0.5	144	1	0	0.12922	-0.88867	229.262	2.36033	200.178	-2.80579	40.6615	3.72347e-07	1	1.68854e-06	0.999998
	0.5	144	2	9.42681	0.156314	-0.806001	253.049	2.40321	227.72	-7.91718	78.1651	3.59313e-07	1	2.60981e-10	1
	0.5	144	3	12.2363	0.156314	-0.806001	224.92	2.35203	189.487	7.97049	14.9766	7.03917e-07	0.999999	4.22644e-08	1
	0.5	144	4	20.7961	0.543974	-0.264422	216.561	2.33558	84.163	0.487542	145.332	6.68919e-05	0.999933	0.774002	0.225998
	0.5	144	5	28.9203	0.206335	-0.685427	224.512	2.35124	208.948	-4.28671	44.0578	1.63674e-06	0.999998	2.45021e-09	1
	0.5	144	6	38.3262	0.179241	-0.746564	245.172	2.38947	236.407	-1.58368	24.699	6.51274e-07	0.999999	5.57356e-12	1
	0.5	144	7	42.3425	0.147978	-0.829804	263.025	2.42	241.681	-2.57787	44.711	2.44114e-07	1	3.44094e-12	1
	0.5	144	8	45.3604	0.248019	-0.605515	125.561	2.09885	97.7142	-17.5635	117.091	5.44341e-05	0.999946	0.311682	0.688318
	0.5	144	9	58.0093	0.295955	-0.528774	123.617	2.09208	79.2113	-31.7154	195.246	9.63242e-05	0.999904	0.998889	0.00111061
	0.5	144	10	59.0577	0.689868	-0.161234	96.5036	1.98454	28.5613	-23.8118	259.145	0.00403401	0.995966	0.999887	0.000112528
	6	145	1	22.2055	0.189666	-0.722011	209.771	2.32175	190.293	5.7381	3.63644	1.82352e-06	0.999998	2.10695e-08	1
	6	145	2	33.45	23.7937	1.37646	42.2747	1.62608	11.3994	-22.8825	190.44	0.999998	1.63688e-06	0.997797	0.00220328
	10	146	1	11.3547	0.345976	-0.460954	110.456	2.04319	54.9231	-15.1686	136.655	0.00025255	0.999747	0.868239	0.131761
	0	147	1	0.871212	0.483544	-0.315564	224.57	2.35135	166.657	0.897279	150.049	3.51852e-05	0.999965	0.00193869	0.998061
	0	147	2	15.636	0.3835	-0.416234	209.769	2.32174	120.386	-5.96119	121.579	1.94661e-05	0.999981	0.0132875	0.986713
	0	147	3	34.1503	0.231351	-0.635729	176.933	2.24781	98.5114	2.76738	86.9412	8.11544e-06	0.999992	0.0449225	0.955078
	0	147	4	41.0053	0.241772	-0.616594	221.164	2.34471	146.438	-2.58676	116.786	2.95498e-06	0.999997	0.000771069	0.999229
	0	148	1	9.39347	0.181325	-0.741542	235.603	2.37218	216.786	-0.0308994	26.4826	8.42071e-07	0.999999	2.78434e-10	1
	0	148	2	30.0979	0.172988	-0.761983	258.657	2.41272	246.56	1.19522	13.891	4.31923e-07	1	4.29707e-13	1
	0	148	3	44.5872	0.137557	-0.861518	243.379	2.38628	235.837	0.191253	18.0184	3.11162e-07	1	4.86334e-12	1
	6	149	1	7.70128	5.33149	0.726849	48.9092	1.68939	12.862	-21.9	201.554	0.991509	0.00849104	0.997911	0.00208949
	6	149	2	14.3667	1.67782	0.224744	103.085	2.0132	30.0176	-22.737	168.244	0.107181	0.892819	0.995201	0.00479899
	6	149	3	26.0239	16.1258	1.20752	52.102	1.71685	11.6876	-30.748	223.073	0.999982	1.75939e-05	0.999914	8.60296e-05
	6	149	4	42.5436	17.4534	1.24188	38.1547	1.58155	10.9935	-24.3881	243.667	0.999988	1.18787e-05	0.999768	0.000232115
	200	150	1	1.86744	49.856	1.69772	80.0794	1.90352	17.4131	-8.28118	298.033	1	4.61217e-09	1	1.24538e-07
	200	150	2	52.1674	7.83032	0.89378	84.1872	1.92525	28.1027	-20.5013	180.677	0.998265	0.00173485	0.993378	0.00662199
	1	151	1	1.04629	0.239688	-0.620354	248.009	2.39447	233.745	-3.08712	30.7778	1.57562e-06	0.999998	1.25769e-11	1
	1	151	2	1.48606	0.12297	-0.9102	244.575	2.38841	236.343	-1.50035	18.2829	2.22161e-07	1	4.88866e-12	1
	1	151	3	3.6245	0.231351	-0.635729	262.665	2.4194	247.323	2.92422	7.11857	1.02878e-06	0.999999	2.99344e-13	1
	1	151	4	4.206	0.241772	-0.616594	244.116	2.3876	215.495	9.29377	15.9783	1.76383e-06	0.999998	5.25094e-10	1
	1	151	5	6.90093	0.27512	-0.560478	221.819	2.346	150.568	12.0706	19.3702	4.50061e-06	0.999995	4.19221e-05	0.999958
	1	151	6	7.93263	0.310552	-0.507865	206.374	2.31465	173.217	-6.85881	78.0247	9.81112e-06	0.99999	3.0768e-06	0.999997
	1	151	7	12.9119	0.172992	-0.761974	257.177	2.41023	203.191	6.55581	58.0173	4.46172e-07	1	2.66874e-08	1
	1	151	8	15.7006	0.241772	-0.616594	163.872	2.2145	143.828	-11.1608	99.33	1.36547e-05	0.999986	0.000544251	0.999456
	1	151	9	18.8666	0.264699	-0.577248	223.321	2.34893	196.448	-1.62714	40.6239	3.8098e-06	0.999996	1.77505e-08	1
	1	151	10	20.2005	0.195919	-0.707924	238.911	2.37824	219.973	-3.98702	36.8572	9.92317e-07	0.999999	2.49782e-10	1
	1	151	11	22.4494	0.441859	-0.354716	135.123	2.13073	93.2296	-3.68695	123.635	0.000230136	0.99977	0.167134	0.832866
	1	151	12	24.6503	0.512724	-0.290117	154.093	2.18778	33.9917	-1.72117	245.589	0.000224946	0.999775	0.999995	4.64929e-06
	1	151	13	25.7967	0.56483	-0.248082	103.127	2.01337	48.3266	-28.4777	187.293	0.00158158	0.998418	0.99909	0.000909783
	1	151	14	35.1653	0.439775	-0.356769	161.409	2.20793	57.1565	0.0841515	181.239	0.000105198	0.999895	0.996075	0.00392482
	1	151	15	36.9057	0.591925	-0.227733	93.987	1.97307	46.0315	-26.3909	173.827	0.00262669	0.997373	0.997837	0.00216266
	1	151	16	38.6148	0.525229	-0.279651	116.987	2.06814	52.84	-17.8169	154.375	0.000754196	0.999246	0.948051	0.0519493
	1	151	17	39.7715	0.677379	-0.169168	94.0915	1.97355	53.8209	-12.6143	168.144	0.0041414	0.995859	0.93615	0.0638504
	1	151	18	41.9225	0.493965	-0.306303	121.586	2.08488	48.3569	-25.5961	170.331	0.000522978	0.999477	0.996648	0.00335229
	1	151	19	45.2989	0.67321	-0.171849	99.2933	1.99692	60.9633	-15.3023	156.199	0.00334155	0.996658	0.891307	0.108693
	1	151	20	47.2498	0.498134	-0.302654	112.374	2.05067	40.664	-30.9678	208.039	0.000739795	0.99926	0.999814	0.000185905
	1	151	21	49.903	0.256362	-0.591147	224.531	2.35128	139.74	2.23843	93.2183	3.32419e-06	0.999997	0.000908712	0.999091
	1	151	22	51.7726	0.612767	-0.212704	88.1566	1.94525	34.2061	-20.9146	195.486	0.00372793	0.996272	0.99549	0.00451011
	1	151	23	53.4254	0.418933	-0.377856	133.032	2.12395	78.1675	-18.1458	178.829	0.000205436	0.999795	0.912368	0.0876322
	1	151	24	57.3813	0.387669	-0.411539	142.035	2.1524	73.002	-22.1582	160.188	0.000119149	0.999881	0.954147	0.0458533
	1	151	25	58.2963	1.70283	0.23117	45.4072	1.65712	16.1227	-16.8578	163.087	0.479844	0.520156	0.983172	0.0168277
	10	152	1	0.552312	0.389745	-0.40922	119.777	2.07837	69.9065	-11.317	171.585	0.000255292	0.999745	0.888191	0.111809
	10	152	2	3.35347	0.27303	-0.56379	177.294	2.2487	113.388	-14.2539	181.191	1.34406e-05	0.999987	0.377517	0.622483
	10	152	3	11.2776	1.52146	0.182261	79.5031	1.90038	21.1711	-21.589	227.764	0.134676	0.865324	0.999199	0.000800549
	10	152	4	16.6506	0.218841	-0.659872	188.741	2.27587	116.522	-6.63829	124.946	4.91625e-06	0.999995	0.0222365	0.977764
	10	152	5	44.8644	15.1333	1.17993	37.5553	1.57467	7.54727	-17.7267	193.473	0.999972	2.77367e-05	0.994684	0.00531575
	0.5	153	1	2.61989	0.154234	-0.81182	275.795	2.44059	212.83	10.4623	13.1058	2.09893e-07	1	9.61326e-10	1
	0.5	153	2	3.18264	1.15259	0.0616734	234.478	2.3701	169.913	-12.078	118.297	0.00152866	0.998471	3.2563e-05	0.999967
	0.5	153	3	9.38326	0.579419	-0.237007	203.075	2.30766	131.125	-4.78941	115.802	0.000114311	0.999886	0.00343205	0.996568
	0.5	153	4	23.1601	0.193835	-0.712569	169.898	2.23019	150.829	-0.506092	65.4806	5.99409e-06	0.999994	4.29808e-05	0.999957
	0.5	153	5	23.8354	0.258446	-0.58763	189.107	2.27671	153.035	6.21618	15.5443	8.17609e-06	0.999992	1.0011e-05	0.99999
	0.5	153	6	28.0852	0.660705	-0.179992	92.4212	1.96577	26.1657	-12.5557	161.287	0.00405104	0.995949	0.964097	0.0359034
	0.5	153	7	34.934	0.927488	-0.0326917	84.6204	1.92748	33.889	-2.77273	202.505	0.0181228	0.981877	0.999219	0.000780514
	0.5	153	8	54.3154	0.310552	-0.507865	183.122	2.26274	117.478	-1.96237	129.98	1.75209e-05	0.999982	0.0434863	0.956514
	200	154	1	0.460618	59.5364	1.77478	92.5695	1.96647	0.439525	-14.2805	328.537	1	9.32828e-10	1	3.69896e-08
	10	155	1	6.91969	0.944162	-0.0249535	42.6591	1.63001	15.3367	-24.9122	191.092	0.129822	0.870178	0.998745	0.00125468
	10	155	2	21.5073	1.16509	0.0663601	43.2005	1.63549	15.3366	-25.2684	195.126	0.217585	0.782415	0.998958	0.0010424
	10	155	3	36.2241	0.214677	-0.668215	186.055	2.26964	119.213	-12.7916	114.468	5.00002e-06	0.999995	0.0173625	0.982637
	10	155	4	58.5047	1.49232	0.173861	44.4416	1.64779	16.356	-17.4092	232.283	0.375217	0.624783	0.999255	0.000744817
	6	156	1	4.32897	0.225098	-0.647628	203.524	2.30862	148.373	-9.50954	141.59	3.61944e-06	0.999996	0.00153674	0.998463
	6	156	2	8.93306	1.10256	0.0424039	63.3562	1.80179	21.5773	-31.126	250.365	0.0763751	0.923625	0.999961	3.88885e-05
	6	156	3	16.0695	0.231351	-0.635729	178.962	2.25276	111.815	-9.23989	146.675	7.65606e-06	0.999992	0.0913913	0.908609
	6	156	4	19.6669	5.67748	0.754155	37.1797	1.57031	10.3967	-6.74416	240.918	0.995059	0.00494125	0.999939	6.14895e-05
	1	157	1	12.0594	0.362658	-0.440503	136.283	2.13444	99.848	-1.43502	106.744	0.00011509	0.999885	0.0587013	0.941299
	1	157	2	13.0744	0.3835	-0.416234	142.707	2.15445	111.266	-3.29689	102.986	0.000112557	0.999887	0.015573	0.984427
	1	157	3	15.5359	0.120886	-0.917624	198.626	2.29804	124.307	15.973	59.6849	7.2929e-07	0.999999	0.0444768	0.955523
	1	157	4	15.8235	0.243856	-0.612866	194.41	2.28872	179.607	0.826276	33.6132	5.90384e-06	0.999994	2.36822e-07	1
	1	157	5	16.3759	0.323057	-0.490721	164.592	2.21641	70.5996	-1.64131	121.67	3.32119e-05	0.999967	0.521629	0.478371
	1	157	6	18.8936	0.268867	-0.570463	190.988	2.28101	136.858	-2.67409	79.1567	8.84143e-06	0.999991	0.000389551	0.99961
	1	157	7	23.5894	0.273035	-0.563781	168.039	2.22541	144.582	-2.09732	35.3397	1.74953e-05	0.999983	5.00491e-05	0.99995
	1	157	8	25.0588	0.252193	-0.598267	207.84	2.31773	185.112	-3.92929	34.0799	4.67729e-06	0.999995	1.32608e-07	1
	1	157	9	27.908	0.212592	-0.672452	220.448	2.34331	183.15	3.13635	39.6019	1.98332e-06	0.999998	1.76311e-07	1
	1	157	10	32.2265	0.227182	-0.643626	183.808	2.26436	158.538	0.57247	20.8382	6.31658e-06	0.999994	4.77372e-06	0.999995
	1	157	11	35.5384	2.49484	0.397042	42.4574	1.62795	12.4633	-20.2074	164.835	0.821249	0.178751	0.992729	0.00727099
	1	157	12	39.0462	1.86956	0.27174	54.436	1.73589	12.7709	-14.1667	197.737	0.471604	0.528396	0.99439	0.00560963
	1	157	13	42.3643	0.514807	-0.288355	88.6935	1.94789	17.1075	-18.3992	143.818	0.00208156	0.997918	0.983828	0.0161722
	1	157	14	54.2111	0.702389	-0.153422	76.4637	1.88346	27.5552	-16.8665	166.143	0.00962519	0.990375	0.980524	0.0194759
	1	157	15	56.8768	1.50482	0.177485	58.1137	1.76428	16.8867	-19.0626	127.1	0.24743	0.75257	0.986677	0.0133233
	1	157	16	58.9465	1.05046	0.0213783	47.7614	1.67908	20.6647	-12.54	122.078	0.132665	0.867335	0.920507	0.0794933
	0.5	158	1	2.98873	0.122967	-0.91021	243.349	2.38623	182.88	0.971154	68.1379	2.2892e-07	1	5.10498e-07	0.999999
	0.5	158	2	7.25299	0.433512	-0.362999	256.787	2.40957	191.297	0.778868	96.8229	1.22303e-05	0.999988	6.89442e-07	0.999999
	0.5	158	3	8.08667	0.197998	-0.703338	242.028	2.38387	227.318	-1.8363	80.0984	9.55958e-07	0.999999	3.08287e-10	1
	0.5	158	4	9.43931	0.202167	-0.69429	226.696	2.35544	205.999	-4.16194	57.1303	1.45699e-06	0.999999	5.87727e-09	1
	0.5	158	5	10.0729	0.279282	-0.553957	203.144	2.3078	151.726	-11.989	163.838	7.36911e-06	0.999993	0.00369896	0.996301
	0.5	158	6	11.19	0.195914	-0.707934	216.563	2.33559	202.803	-2.80744	61.1076	1.69246e-06	0.999998	1.13511e-08	1
	0.5	158	7	12.1321	0.158399	-0.800248	268.799	2.42943	224.053	-0.81347	55.1103	2.64229e-07	1	1.80891e-10	1
	0.5	158	8	25.7419	0.195914	-0.707934	230.576	2.36281	209.157	2.91638	30.1642	1.20438e-06	0.999999	1.36856e-09	1
	0.5	158	9	31.3108	0.125052	-0.902911	234.7	2.37051	223.075	-5.61219	50.3206	2.97017e-07	1	2.20627e-10	1
	0.5	158	10	43.0615	0.187577	-0.72682	239.138	2.37865	216.064	-0.410784	36.413	8.61157e-07	0.999999	4.25841e-10	1
	0.5	158	11	44.1224	0.147978	-0.829804	243.24	2.38604	209.813	-8.42829	69.569	3.84223e-07	1	6.28949e-09	1
	0.5	158	12	49.3245	0.19383	-0.712579	207.333	2.31667	189.45	-1.93819	31.933	2.07301e-06	0.999998	4.99491e-08	1
	0.5	158	13	55.6229	0.177156	-0.751643	258.913	2.41315	185.64	0.100025	81.7732	4.62715e-07	1	6.04846e-07	0.999999
	6	159	1	2.42606	0.262614	-0.580682	198.987	2.29883	169.92	-1.98501	75.6001	6.66312e-06	0.999993	4.14637e-06	0.999996
	6	159	2	3.27226	0.218845	-0.659863	189.235	2.277	178.621	-2.02748	59.4669	4.85017e-06	0.999995	6.01509e-07	0.999999
	6	159	3	5.46279	0.298046	-0.525716	169.544	2.22928	98.9198	-8.27468	128.354	2.21608e-05	0.999978	0.114379	0.885621
	6	159	4	10.6734	0.183413	-0.73657	227.353	2.3567	194.759	-1.68551	78.9373	1.06176e-06	0.999999	1.00176e-07	1
	6	159	5	13.3933	0.454364	-0.342596	98.0002	1.99123	69.5192	-4.51527	182.187	0.000953049	0.999047	0.976233	0.0237669
	6	159	6	21.7699	0.327226	-0.485153	182.338	2.26088	146.354	-10.2499	70.8934	2.13579e-05	0.999979	0.000203793	0.999796
	6	159	7	22.5473	17.566	1.24467	43.3404	1.63689	10.3431	-12.9998	217.344	0.999989	1.08665e-05	0.998367	0.00163341
	6	159	8	40.5906	0.414764	-0.382199	86.7312	1.93818	55.8288	-17.5419	172.854	0.00118807	0.998812	0.962464	0.037536
	6	159	9	41.2492	0.523144	-0.281379	206.215	2.31432	160.931	-16.373	141.142	7.04448e-05	0.99993	0.000490921	0.999509
	6	159	10	45.0029	0.366826	-0.43554	92.5295	1.96628	65.301	-34.4358	206.687	0.000640857	0.999359	0.999887	0.000112681
	200	160	1	0.902456	4.88326	0.68871	97.0401	1.98695	48.2741	-30.2619	239.37	0.969061	0.0309385	0.999861	0.000139473
	200	160	2	6.04416	10.7815	1.03268	102.727	2.01168	39.4036	-30.5736	219.73	0.999725	0.000275272	0.999831	0.000168853
	200	160	3	17.0716	42.926	1.63272	63.7936	1.80478	20.0543	-24.2855	294.588	1	1.86822e-08	0.999993	7.46101e-06
	10	161	1	5.30439	0.262614	-0.580682	177.599	2.24944	141.796	-13.0741	117.739	1.17776e-05	0.999988	0.00154684	0.998453
	10	161	2	6.74043	0.556492	-0.254541	98.1248	1.99178	56.428	-30.2117	197.757	0.00181897	0.998181	0.999437	0.000563278
	10	161	3	11.2674	0.60443	-0.218654	77.5865	1.88979	17.5113	-19.2842	215.414	0.00564844	0.994352	0.998172	0.00182817
	10	161	4	20.9987	6.4278	0.808062	31.2353	1.49465	7.74382	-13.2509	244.08	0.997537	0.00246335	0.999776	0.000223538
	10	161	5	44.93	15.0691	1.17809	38.0075	1.57987	10.6167	-25.2972	217.233	0.999972	2.8338e-05	0.99943	0.000569819
	0	162	1	1.70904	1.38599	0.14176	187.354	2.27266	80.8113	5.09846	83.3684	0.0082017	0.991798	0.197389	0.802611
	0	162	2	4.34763	1.67778	0.224734	173.891	2.24028	87.6124	18.9327	48.2234	0.0266323	0.973368	0.69221	0.30779
	0	162	3	16.7423	0.577321	-0.238582	172.993	2.23803	110.161	-3.77074	69.3671	0.000219663	0.99978	0.00578517	0.994215
	0	162	4	22.2133	0.147978	-0.829804	223.509	2.3493	207.411	-4.27287	36.1956	6.24994e-07	0.999999	2.78316e-09	1
	0	162	5	26.7402	0.241766	-0.616604	194.877	2.28976	134.501	8.85001	14.9316	5.67483e-06	0.999994	0.000152982	0.999847
	0	162	6	29.3809	0.254272	-0.594702	147.208	2.16793	119.488	-3.3043	57.6665	2.6958e-05	0.999973	0.00166424	0.998336
	0	162	7	33.9432	0.181325	-0.741543	116.771	2.06733	67.9366	-2.49165	95.8239	3.54428e-05	0.999965	0.276773	0.723227
	0	162	8	35.7606	0.202167	-0.69429	227.784	2.35752	195.362	0.824297	46.128	1.4198e-06	0.999999	2.54564e-08	1
	0	162	9	37.7656	0.281366	-0.550728	187.789	2.27367	132.084	-4.78893	69.0433	1.11576e-05	0.999989	0.000547459	0.999453
	0	162	10	40.673	0.229261	-0.639669	102.503	2.01074	56.2729	-23.6581	149.548	0.000117836	0.999882	0.988413	0.0115871
	0	162	11	46.4004	0.204251	-0.689836	227.95	2.35784	147.007	15.2995	28.4735	1.46064e-06	0.999999	0.000290913	0.999709
	0	162	12	55.3853	0.197998	-0.703338	234.643	2.37041	137.723	-7.52264	158.015	1.132e-06	0.999999	0.0169175	0.983082
	0	162	13	57.5321	0.245935	-0.60918	185.538	2.26843	132.654	-13.3025	102.187	7.6915e-06	0.999992	0.00333877	0.996661
	0	162	14	58.7742	0.275113	-0.560488	168.661	2.22701	138.407	-1.8379	81.0215	1.75964e-05	0.999982	0.000355754	0.999644
	10	163	1	0.158402	0.233435	-0.631834	163.239	2.21282	121.737	-18.9477	134.463	1.25482e-05	0.999987	0.0139304	0.98607
	10	163	2	1.35059	0.283457	-0.547513	195.731	2.29166	147.673	-9.16666	101.161	9.31743e-06	0.999991	0.000275078	0.999725
	10	163	3	2.05506	0.304299	-0.516699	166.384	2.22111	144.769	-12.4091	154.917	2.59426e-05	0.999974	0.00498491	0.995015
	10	163	4	4.36857	0.17716	-0.751633	229.198	2.36021	166.354	-9.43941	120.394	9.14269e-07	0.999999	4.89769e-05	0.999951
	10	163	5	6.45906	0.258446	-0.587631	184.114	2.26509	157.599	-13.2919	116.107	9.35207e-06	0.999991	0.000198445	0.999802
	10	163	6	7.69085	0.360574	-0.443006	95.3878	1.97949	45.516	-25.7397	203.577	0.000536615	0.999463	0.998431	0.00156855
	10	163	7	11.6926	0.243856	-0.612866	198.07	2.29682	166.857	-15.9179	171.237	5.36676e-06	0.999995	0.000910704	0.999089
	10	163	8	15.2775	0.32931	-0.482395	140.907	2.14893	121.483	-11.6836	101.466	7.27679e-05	0.999927	0.00852816	0.991472
	10	163	9	18.2225	8.8872	0.948765	29.0391	1.46298	11.7936	-4.75952	137.066	0.999498	0.000501586	0.929145	0.0708552
	10	163	10	30.1277	29.8713	1.47525	36.0103	1.55643	5.97388	-6.52801	298.63	1	4.32147e-07	1	6.02821e-08
	200	164	1	1.86118	58.1365	1.76445	73.4242	1.86584	1.4838	-22.4772	216.986	1	1.51317e-09	0.998947	0.00105344
	6	165	1	2.91585	0.429353	-0.367185	144.713	2.16051	76.6271	-19.201	165.175	0.000155355	0.999845	0.895333	0.104667
	6	165	2	3.97881	0.685715	-0.163856	116.239	2.06535	69.9754	-20.2151	165.437	0.0020105	0.997989	0.942565	0.0574351
	6	165	3	5.14182	0.902476	-0.0445644	77.357	1.8885	42.4727	-22.4207	182.707	0.0217165	0.978283	0.993942	0.00605763
	6	165	4	14.2708	0.20634	-0.685417	241.869	2.38358	174.394	-3.5038	135.992	1.09516e-06	0.999999	6.44595e-05	0.999936
	6	165	5	20.5381	0.204256	-0.689826	210.474	2.3232	191.653	-4.77436	97.6374	2.24177e-06	0.999998	3.59906e-07	1
	6	165	6	30.0235	0.204256	-0.689826	175.512	2.24431	126.412	-10.3961	94.9291	5.86092e-06	0.999994	0.00351746	0.996483
	0.5	166	1	0.225093	0.206335	-0.685427	250.978	2.39963	212.104	0.739729	45.3395	8.95917e-07	0.999999	1.24509e-09	1
	0.5	166	2	7.62398	0.523132	-0.281388	250.39	2.39862	167.243	5.63887	158.675	3.00429e-05	0.99997	0.0318705	0.96813
	0.5	166	3	10.2292	0.181325	-0.741543	276.307	2.44139	216.18	-5.72754	106.664	3.45551e-07	1	8.51347e-09	1
	0.5	166	4	15.3459	0.202167	-0.69429	243.801	2.38704	203.635	-9.26053	70.6696	9.82001e-07	0.999999	2.23227e-08	1
	0.5	166	5	24.6539	0.158399	-0.800248	252.706	2.40262	233.631	1.97854	20.3978	3.76738e-07	1	8.03928e-12	1
	0.5	166	6	27.7656	0.208419	-0.681062	230.64	2.36293	209.428	-4.28124	39.6609	1.46196e-06	0.999999	2.04147e-09	1
	0.5	166	7	37.3258	0.425175	-0.371432	152.288	2.18267	101.816	-19.8243	156.653	0.000120283	0.99988	0.534945	0.465055
	0.5	166	8	38.6868	0.320966	-0.493541	146.198	2.16494	103.958	-5.72554	125.47	5.65995e-05	0.999943	0.0720855	0.927914
	1	167	1	0.78159	0.748242	-0.125958	178.072	2.2506	128.712	-1.59937	87.8202	0.000569774	0.99943	0.0014762	0.998524
	1	167	2	3.83709	0.162571	-0.788958	231.181	2.36395	217.272	-2.93427	36.8222	6.75052e-07	0.999999	3.82366e-10	1
	1	167	3	6.56744	0.200087	-0.698781	235.74	2.37243	190.191	7.00176	23.0391	1.14084e-06	0.999999	4.46482e-08	1
	1	167	4	7.63457	0.250109	-0.601871	197.282	2.29509	155.547	2.95092	53.678	5.94018e-06	0.999994	1.85399e-05	0.999981
	1	167	5	16.8844	0.193834	-0.712569	247.901	2.39428	231.288	-0.590447	28.2609	7.83314e-07	0.999999	1.6734e-11	1
	1	167	6	29.0085	0.435606	-0.360906	127.386	2.10512	60.1397	-11.9721	168.67	0.000281654	0.999718	0.917732	0.0822684
	1	167	7	30.6237	0.279288	-0.553947	193.973	2.28774	162.998	0.93141	57.5015	9.27472e-06	0.999991	6.39674e-06	0.999994
	1	167	8	34.2441	0.195919	-0.707924	218.232	2.33892	199.201	-6.4996	58.2823	1.62374e-06	0.999998	2.50574e-08	1
	0.5	168	1	3.98081	0.108378	-0.965059	289.554	2.46173	279.13	-4.43086	44.337	5.63561e-08	1	7.91683e-16	1
	0.5	168	2	5.8545	0.135473	-0.868149	315.314	2.49874	297.247	5.50762	10.3663	6.38788e-08	1	2.73514e-18	1
	0.5	168	3	8.51184	0.34806	-0.458346	282.013	2.45027	238.647	-2.05477	77.2176	3.22614e-06	0.999997	2.77384e-11	1
	0.5	168	4	12.0466	0.368902	-0.433089	268.427	2.42883	224.935	-5.54065	79.5277	5.17412e-06	0.999995	4.17595e-10	1
	0.5	168	5	20.4459	0.164651	-0.783435	215.506	2.33346	189.495	-6.8693	63.8576	1.03903e-06	0.999999	1.57741e-07	1
	0	169	1	0.0729468	0.19383	-0.712579	267.759	2.42774	249.928	-1.52935	34.6142	5.11725e-07	0.999999	5.53933e-11	1
	0	169	2	30.4355	0.208419	-0.681062	229.556	2.36089	204.362	-4.78593	37.4706	1.49946e-06	0.999999	5.32288e-09	1
	0	169	3	35.7627	0.195914	-0.707934	215.804	2.33406	202.756	1.9375	28.9533	1.72492e-06	0.999998	4.05236e-09	1
	0	169	4	36.8631	0.189662	-0.722021	195.124	2.29031	177.441	-0.0572272	26.2656	2.69554e-06	0.999997	2.92536e-07	1
	0	169	5	38.3096	0.187577	-0.72682	239.567	2.37943	228.883	0.103743	17.2053	8.52697e-07	0.999999	2.01436e-11	1
	6	170	1	0.202171	0.231351	-0.635729	223.705	2.34968	153.501	11.6943	39.9803	2.40865e-06	0.999998	7.35366e-05	0.999926
	6	170	2	11.8572	0.414764	-0.382199	144.195	2.15895	97.2948	-8.56701	126.373	0.000140093	0.99986	0.120388	0.879612
	6	170	3	15.4651	17.8244	1.25102	28.1391	1.44931	7.82041	-15.0405	189.867	0.999988	1.23534e-05	0.992184	0.00781587
	6	170	4	36.9932	23.0038	1.3618	32.318	1.50944	8.17918	-13.552	128.254	0.999998	2.48057e-06	0.950563	0.049437
	1	171	1	2.44267	0.197998	-0.703338	281.578	2.4496	259.707	-2.11052	45.0375	4.15235e-07	1	6.84546e-14	1
	1	171	2	3.68694	0.164651	-0.783435	287.726	2.45898	258.108	3.76	28.0665	2.01385e-07	1	6.22378e-14	1
	1	171	3	4.00582	0.150062	-0.82373	262.268	2.41875	225.406	-8.14814	162.05	2.5877e-07	1	7.21831e-08	1
	1	171	4	4.36847	0.175072	-0.756783	310.311	2.4918	259.249	4.71894	55.8224	1.59109e-07	1	2.63601e-13	1
	1	171	5	5.33762	0.164651	-0.783435	307.044	2.4872	296.463	-2.87942	28.2381	1.38287e-07	1	5.51338e-18	1
	1	171	6	5.79197	0.122967	-0.91021	306.383	2.48627	293.873	0.132381	13.0391	5.68932e-08	1	5.72391e-18	1
	1	171	7	8.86407	0.183409	-0.736579	277.148	2.44271	243.604	1.668	36.7032	3.52505e-07	1	1.7962e-12	1
	1	171	8	9.38512	0.208419	-0.681062	184.117	2.26509	106.446	-24.7324	159.606	4.83717e-06	0.999995	0.781391	0.218609
	1	171	9	11.3651	0.185493	-0.731672	249.769	2.39754	243.154	-3.38593	39.4811	6.5368e-07	0.999999	2.23086e-12	1
	1	171	10	12.0154	0.175072	-0.756783	302.836	2.48121	294.534	0.916264	14.9152	1.83004e-07	1	5.0918e-18	1
	1	171	11	18.9099	0.195914	-0.707934	270.94	2.43287	256.623	1.10906	10.8689	4.96414e-07	1	4.23805e-14	1
	1	171	12	19.8374	0.214672	-0.668225	253.791	2.40448	226.968	-4.77953	54.7651	9.60968e-07	0.999999	1.07702e-10	1
	1	171	13	22.403	0.223009	-0.651678	234.758	2.37062	224.398	-6.10209	48.2456	1.6553e-06	0.999998	1.71561e-10	1
	1	171	14	30.8419	0.308461	-0.5108	159.419	2.20254	66.0799	-1.02131	194.836	3.32224e-05	0.999967	0.997758	0.00224232
	1	171	15	32.0382	1.3047	0.115512	76.1216	1.88151	31.7051	-21.8579	253.486	0.0855874	0.914413	0.999807	0.000192538
	1	171	16	35.7648	11.0441	1.04313	66.2198	1.82099	16.6138	-16.2329	194.524	0.999813	0.000186617	0.993759	0.0062413
	1	171	17	49.5746	0.410586	-0.386596	136.081	2.1338	57.8439	-21.0425	227.327	0.000174146	0.999826	0.99785	0.00215007
	1	171	18	51.1774	0.325134	-0.487937	175.282	2.24374	142.753	-12.7658	117.334	2.52046e-05	0.999975	0.00129804	0.998702
	1	171	19	58.9785	0.439765	-0.35678	134.539	2.12885	59.7884	-8.22274	147.453	0.000230646	0.999769	0.806424	0.193576
	200	172	1	0.631525	59.1862	1.77222	73.576	1.86674	10.2468	-4.2034	242.883	1	1.30824e-09	0.99998	1.98485e-05
	0.5	173	1	9.46641	0.177156	-0.751643	220.856	2.34411	199.282	2.01305	22.044	1.12255e-06	0.999999	6.22506e-09	1
	0.5	173	2	14.9478	0.262608	-0.580691	183.908	2.2646	172.079	0.778312	18.8544	9.89573e-06	0.99999	5.8284e-07	0.999999
	0.5	173	3	18.4597	0.262608	-0.580691	190.838	2.28067	163.315	-1.72502	68.4688	8.2226e-06	0.999992	8.22925e-06	0.999992
	0.5	173	4	30.4584	0.356397	-0.448066	156.572	2.19471	117.144	-2.87073	62.9134	5.80348e-05	0.999942	0.00231861	0.997681
	0.5	173	5	46.3775	0.200083	-0.698791	165.512	2.21883	112.299	-9.8827	112.763	7.5119e-06	0.999992	0.0227929	0.977207
	0.5	173	6	59.5537	0.23343	-0.631844	163.794	2.2143	134.048	0.889223	45.409	1.23342e-05	0.999988	0.00020547	0.999795
	200	174	1	0.310545	59.6871	1.77588	69.5482	1.84229	10.1583	-18.0857	236.621	1	1.32007e-09	0.99944	0.000560387
	10	175	1	4.42693	0.187582	-0.72681	220.994	2.34438	198.798	-10.2042	84.0438	1.32813e-06	0.999999	8.47405e-08	1
	10	175	2	6.23605	0.585671	-0.232346	57.9283	1.76289	26.1025	-20.2137	203.58	0.0142217	0.985778	0.996878	0.00312236
	10	175	3	7.13018	40.9928	1.61271	48.7318	1.68781	9.37115	-6.33686	211.594	1	3.55253e-08	0.999158	0.000842036
	10	175	4	48.5003	0.166739	-0.777962	244.537	2.38834	219.911	-2.1955	42.3733	5.29908e-07	0.999999	2.54922e-10	1
	10	175	5	50.6741	0.525228	-0.279652	100.64	2.00277	42.3834	-29.5239	263.053	0.00136333	0.998637	0.999951	4.88357e-05
	10	175	6	52.081	7.91594	0.898503	49.2133	1.69208	13.5271	-24.028	359.084	0.998901	0.00109854	1	9.22091e-09
	6	176	1	0.879529	0.139641	-0.854987	226.293	2.35467	168.397	6.51559	114.152	4.9572e-07	1	0.000413643	0.999586
	6	176	2	10.8253	0.164651	-0.783435	251.08	2.39981	223.514	-6.18278	78.8269	4.39209e-07	1	5.42229e-10	1
	6	176	3	11.9445	0.243851	-0.612876	193.735	2.28721	149.445	-12.138	115.741	6.00915e-06	0.999994	0.000488313	0.999512
	6	176	4	40.3687	0.227177	-0.643636	208.195	2.31847	154.077	-5.14929	72.5677	3.30943e-06	0.999997	3.66589e-05	0.999963
	6	176	5	41.2045	0.337639	-0.471547	124.423	2.0949	48.5249	-22.2586	214.423	0.000138342	0.999862	0.997427	0.00257315
	6	176	6	45.0707	0.241766	-0.616604	187.23	2.27238	141.507	-14.293	161.856	6.96204e-06	0.999993	0.0113494	0.988651
	6	176	7	49.1515	0.248019	-0.605515	201.747	2.30481	145.798	-14.399	122.152	5.15779e-06	0.999995	0.00133184	0.998668
	6	176	8	50.7918	0.248019	-0.605515	199.298	2.2995	130.483	-2.64896	162.53	5.48987e-06	0.999995	0.117345	0.882655
	6	176	9	58.0615	0.15423	-0.81183	231.803	2.36512	185.714	-5.91997	73.9356	5.70649e-07	0.999999	3.56155e-07	1
	1	177	1	1.07547	0.241772	-0.616594	307.67	2.48808	199.31	-1.94462	147.896	5.14329e-07	0.999999	6.13217e-06	0.999994
	1	177	2	3.2139	0.262614	-0.580682	257.065	2.41004	222.085	-14.4167	107.033	1.79506e-06	0.999998	5.07723e-09	1
	1	177	3	3.77456	0.187582	-0.72681	269.659	2.43082	254.309	-1.17165	21.5721	4.42161e-07	1	1.03943e-13	1
	1	177	4	4.31855	0.166739	-0.777962	246.711	2.39219	225.702	2.10084	28.9453	5.04036e-07	0.999999	5.31629e-11	1
	1	177	5	4.89588	0.210508	-0.676731	238.88	2.37818	212.411	2.64456	14.2916	1.24957e-06	0.999999	4.56339e-10	1
	1	177	6	5.87964	0.20634	-0.685417	210.496	2.32324	190.593	4.68601	37.4408	2.31157e-06	0.999998	5.55338e-08	1
	1	177	7	8.28069	0.675294	-0.170507	181.478	2.25883	134.953	-8.26627	61.0057	0.000342799	0.999657	0.000545021	0.999455
	1	177	8	17.9745	0.193834	-0.712569	247.64	2.39382	224.164	-2.15179	44.6358	7.87865e-07	0.999999	1.19227e-10	1
	1	177	9	27.2702	0.233435	-0.631834	232.84	2.36706	212.477	-0.620968	59.6819	2.01013e-06	0.999998	1.96896e-09	1
	1	177	10	30.7717	0.216761	-0.664019	216.843	2.33614	205.615	-1.43599	26.0837	2.30221e-06	0.999998	2.44019e-09	1
	1	177	11	34.7359	0.237603	-0.624147	216.233	2.33492	192.342	-1.40337	47.7251	3.1381e-06	0.999997	4.36734e-08	1
	1	177	12	36.4721	0.183413	-0.73657	249.599	2.39724	228.933	-2.54701	23.7363	6.33299e-07	0.999999	2.77789e-11	1
	0.5	178	1	10.8878	0.356397	-0.448066	215.261	2.33297	124.907	2.51929	98.5224	1.31256e-05	0.999987	0.0068745	0.993126
	0.5	178	2	16.0212	0.421007	-0.375711	149.467	2.17455	58.8194	-2.02941	213.77	0.000126103	0.999874	0.999648	0.000352025
	0.5	178	3	18.9682	0.656521	-0.182751	95.8274	1.98149	61.25	-18.3465	199.23	0.00347955	0.99652	0.98551	0.0144897
	0.5	178	4	24.1454	0.389744	-0.40922	135.573	2.13217	62.4451	-21.6849	143.148	0.000148898	0.999851	0.965831	0.0341687
	0.5	178	5	25.1104	0.302208	-0.519694	149.666	2.17512	75.9486	-13.3447	149.139	4.19679e-05	0.999958	0.680729	0.319271
	0.5	178	6	26.5464	0.312629	-0.504971	111.29	2.04646	54.9792	-18.7963	156.318	0.000182138	0.999818	0.955453	0.0445469
	0.5	178	7	30.5313	0.241766	-0.616604	153.468	2.18602	115.737	-13.3883	131.463	1.89458e-05	0.999981	0.042863	0.957137
	0.5	178	8	32.4259	0.175072	-0.756783	277.759	2.44367	235.097	-3.90088	70.0141	2.99636e-07	1	3.67355e-11	1
	0.5	178	9	37.8364	0.262608	-0.580691	204.274	2.31021	131.115	-20.4714	143.559	5.83602e-06	0.999994	0.0505544	0.949446
	0.5	178	10	42.2528	0.28345	-0.547523	146.578	2.16607	107.581	-18.8023	135.085	3.80385e-05	0.999962	0.245961	0.754039
	0.5	178	11	48.8056	0.208419	-0.681062	169.159	2.2283	137.58	-2.86819	99.6905	7.52608e-06	0.999992	0.000842138	0.999158
	0.5	178	12	56.8255	0.318882	-0.496371	124.553	2.09535	69.4115	-25.9034	198.839	0.000115889	0.999884	0.994861	0.00513902
	0.5	178	13	59.6934	0.29804	-0.525726	147.197	2.1679	91.4121	-11.5756	152.597	4.34798e-05	0.999957	0.427549	0.572451
	200	179	1	0.175076	59.8219	1.77686	83.576	1.92208	0.194269	-15.0221	312.168	1	1.01728e-09	1	3.76016e-07
	0	180	1	12.922	0.627342	-0.202496	212.953	2.32828	133.336	-4.07304	143.318	0.000130938	0.999869	0.0156862	0.984314
	0	180	2	21.636	0.177156	-0.751643	261.497	2.41747	234.137	2.48935	20.9347	4.37573e-07	1	7.45792e-12	1
	0	180	3	26.7465	0.223009	-0.651678	182.041	2.26017	154.381	-2.65035	99.6502	6.27706e-06	0.999994	0.000106505	0.999893
	0	180	4	27.6135	0.406418	-0.391027	225.958	2.35403	177.749	-4.78305	55.4826	1.71667e-05	0.999983	7.0696e-07	0.999999
	0	180	5	37.776	0.187577	-0.72682	201.142	2.3035	181.713	-0.60107	43.9124	2.21555e-06	0.999998	2.25061e-07	1
	0	180	6	39.1328	0.166735	-0.777972	204.454	2.3106	187.332	-2.46447	36.0996	1.44359e-06	0.999999	8.06809e-08	1
	6	181	1	13.987	0.366818	-0.435549	101.107	2.00478	41.71	-23.619	217.721	0.00043972	0.99956	0.998594	0.00140626
	6	181	2	14.8582	9.36428	0.971474	52.1861	1.71756	14.3411	-20.3748	168.862	0.999554	0.000446182	0.993279	0.00672062
	6	181	3	27.0028	0.225093	-0.647638	188.151	2.27451	153.451	3.66014	35.7844	5.44381e-06	0.999995	1.39127e-05	0.999986
	6	181	4	31.0732	0.318882	-0.496371	132.529	2.12231	82.908	-18.3817	142.1	8.72612e-05	0.999913	0.725532	0.274468
	6	181	5	32.4863	12.824	1.10802	38.1083	1.58102	12.4213	-3.94538	249.985	0.999928	7.15537e-05	0.999992	7.80693e-06
	6	181	6	47.4342	0.139641	-0.854987	244.681	2.3886	228.736	1.45832	15.5696	3.14644e-07	1	1.91184e-11	1
	6	181	7	47.876	0.466859	-0.330814	164.091	2.21508	117.181	-9.1318	119.957	0.000121773	0.999878	0.0171638	0.982836
	6	181	8	48.8201	0.312629	-0.504971	145.71	2.16349	98.5809	-19.1819	164.434	5.29174e-05	0.999947	0.623091	0.376909
	6	181	9	52.7197	7.27592	0.861888	40.2161	1.6044	13.0512	-6.05427	220.887	0.998469	0.00153133	0.999659	0.000340608
	10	182	1	4.91881	0.792011	-0.101269	57.2648	1.75789	25.9106	-23.9779	158.279	0.0354486	0.964551	0.997058	0.00294152
	10	182	2	6.26939	0.577334	-0.238573	85.5693	1.93232	40.9593	-26.5072	226.758	0.0034244	0.996576	0.999494	0.00050617
	10	182	3	8.31403	0.764916	-0.116386	107.315	2.03066	29.8617	-15.8664	294.532	0.00403162	0.995968	0.999997	2.58589e-06
	10	182	4	11.1965	0.241772	-0.616594	210.289	2.32282	178.706	-10.4043	71.4006	3.83705e-06	0.999996	1.86885e-06	0.999998
	10	182	5	13.5309	0.354321	-0.450603	182.538	2.26135	106.288	-25.8954	241.217	2.79866e-05	0.999972	0.991149	0.00885059
	10	182	6	16.0653	1.81954	0.259962	157.981	2.19861	44.4609	-0.392298	189.594	0.0519024	0.948098	0.998566	0.00143396
	10	182	7	19.4397	0.239688	-0.620354	203.767	2.30913	116.047	-18.0103	138.781	4.39008e-06	0.999996	0.111545	0.888455
	10	182	8	21.9283	14.2416	1.15356	37.7056	1.57641	9.56391	-23.4523	228.787	0.999961	3.93872e-05	0.999456	0.000544301
	10	182	9	36.8306	23.1684	1.3649	38.0369	1.5802	9.39418	-15.1897	146.383	0.999998	2.09086e-06	0.970975	0.029025
	0	183	1	0.518964	0.573153	-0.241729	223.439	2.34916	154.95	-5.46874	101.341	7.27812e-05	0.999927	9.30668e-05	0.999907
	0	183	2	4.28302	1.36098	0.133851	192.493	2.28441	73.6365	-31.8503	242.395	0.00686724	0.993133	0.999769	0.000230717
	0	183	3	5.82324	0.47728	-0.321227	216.322	2.3351	158.281	-22.8789	170.886	3.94505e-05	0.999961	0.008211	0.991789
	0	183	4	6.85074	0.145894	-0.835964	250.19	2.39827	183.939	-4.77788	90.0556	3.1327e-07	1	8.54351e-07	0.999999
	0	183	5	16.9778	0.291787	-0.534934	193.91	2.2876	121.863	9.72391	107.535	1.07521e-05	0.999989	0.158588	0.841412
	0	183	6	18.0033	0.235514	-0.627984	180.934	2.25752	125.461	7.8941	98.847	7.64318e-06	0.999992	0.0300277	0.969972
	0	183	7	19.2225	0.248019	-0.605515	180.583	2.25668	94.7305	-13.0179	93.1605	9.05601e-06	0.999991	0.12614	0.87386
	0	183	8	21.6235	0.16882	-0.772577	194.161	2.28816	164.474	8.23484	3.01857	1.98813e-06	0.999998	1.63351e-06	0.999998
	0	183	9	26.909	0.170904	-0.767248	223.4	2.34908	216.557	-1.02697	19.2009	9.47247e-07	0.999999	2.62083e-10	1
	0	183	10	31.7464	0.243851	-0.612876	177.048	2.24809	127.91	2.17602	80.1776	9.49509e-06	0.999991	0.00169939	0.998301
	0	183	11	41.0378	0.229261	-0.639669	199.178	2.29924	182.383	-0.276556	22.6675	4.28938e-06	0.999996	1.24067e-07	1
	0	183	12	42.4884	0.241766	-0.616604	191.829	2.28291	171.015	4.14895	9.42367	6.15137e-06	0.999994	5.47352e-07	0.999999
	0	183	13	52.4216	0.223009	-0.651678	206.846	2.31565	185.844	-3.94228	35.8541	3.22942e-06	0.999997	1.20295e-07	1
	10	184	1	9.66462	0.239688	-0.620354	208.268	2.31862	138.816	-11.7171	86.4702	3.9218e-06	0.999996	0.00088465	0.999115
	10	184	2	15.3254	0.860791	-0.0651022	53.4653	1.72807	17.887	-12.0651	169.101	0.0555528	0.944447	0.976466	0.0235337
	10	184	3	50.1697	0.312636	-0.504961	142.045	2.15243	92.6388	-13.322	141.349	5.95923e-05	0.99994	0.327399	0.672601
	10	184	4	52.2456	7.75129	0.889374	41.9062	1.62228	12.5194	-30.1553	239.47	0.998872	0.0011281	0.999929	7.08741e-05
	200	185	1	0.243851	59.7538	1.77637	82.0079	1.91386	4.59744	-18.8354	256.604	1	1.05173e-09	0.999854	0.00014607
	0.5	186	1	5.15016	0.210508	-0.676731	225.324	2.35281	177.717	-1.91404	74.2097	1.71031e-06	0.999998	1.21395e-06	0.999999
	0.5	186	2	6.60496	0.366826	-0.43554	212.443	2.32724	164.914	-3.92072	67.7004	1.55449e-05	0.999984	6.48011e-06	0.999994
	0.5	186	3	7.3136	0.24594	-0.60917	223.67	2.34961	198.059	-1.08034	37.7057	2.94974e-06	0.999997	1.21505e-08	1
	0.5	186	4	12.1282	0.189666	-0.722011	217.398	2.33726	208.539	-0.676435	34.7135	1.50191e-06	0.999998	1.67163e-09	1
	0.5	186	5	16.1883	0.425185	-0.371422	153.738	2.18678	77.8215	-0.592729	101.184	0.000115412	0.999885	0.221948	0.778052
	0.5	186	6	17.8328	0.15215	-0.817729	212.327	2.32701	203.381	-3.22972	32.7731	9.04415e-07	0.999999	4.88629e-09	1
	0.5	186	7	22.1847	0.304299	-0.516699	177.303	2.24872	154.12	-4.23447	41.9208	1.91242e-05	0.999981	1.8406e-05	0.999982
	0.5	186	8	25.5257	0.587756	-0.230803	95.2187	1.97872	34.4691	-9.64227	190.984	0.00244408	0.997556	0.991085	0.00891475
	0.5	186	9	27.7662	0.312636	-0.504961	160.199	2.20466	141.08	-0.354606	49.7209	3.39019e-05	0.999966	9.45876e-05	0.999905
	0.5	186	10	29.6879	0.32931	-0.482395	125.536	2.09877	77.8103	-17.1671	132.464	0.000123189	0.999877	0.705004	0.294996
	0.5	186	11	31.5471	0.596093	-0.224686	92.9577	1.96829	14.7304	-14.7739	171.478	0.00280087	0.997199	0.982679	0.0173209
	0.5	186	12	33.4937	0.554408	-0.256171	104.081	2.01737	69.1443	-17.6162	121.768	0.00143347	0.998567	0.814365	0.185635
	0.5	186	13	34.9777	0.431438	-0.365082	103.943	2.01679	33.5683	-5.50312	172.095	0.00063838	0.999362	0.982739	0.0172609
	0.5	186	14	37.7685	0.760748	-0.118759	76.0354	1.88102	19.2433	-18.1707	178.897	0.0127726	0.987227	0.990786	0.00921402
	0.5	186	15	40.5551	0.287625	-0.541173	127.573	2.10576	106.503	-6.33762	49.8795	7.65856e-05	0.999923	0.00919427	0.990806
	0.5	186	16	44.6632	6.80921	0.833097	67.1081	1.82677	20.5508	-15.0611	189.464	0.996838	0.0031616	0.991154	0.00884571
	0.5	186	17	52.7709	0.337647	-0.471537	147.561	2.16897	62.1061	-7.32206	157.162	6.37545e-05	0.999936	0.866972	0.133028
	6	187	1	2.44476	0.293871	-0.531843	164.04	2.21495	109.634	-12.5716	135.588	2.48203e-05	0.999975	0.0779426	0.922057
	6	187	2	12.7511	0.291787	-0.534934	169.265	2.22857	118.555	-14.0186	133.459	2.08576e-05	0.999979	0.037799	0.962201
	6	187	3	13.912	0.310545	-0.507876	167.05	2.22285	139.064	-8.02304	76.4458	2.71948e-05	0.999973	0.000383007	0.999617
	6	187	4	14.8791	22.428	1.35079	35.0104	1.5442	6.28044	-14.6795	202.097	0.999997	2.72148e-06	0.995633	0.00436661
	6	187	5	38.3971	0.156314	-0.806001	268.563	2.42905	239.462	-9.27415	81.6947	2.55048e-07	1	3.21732e-11	1
	6	187	6	38.8785	17.0591	1.23196	47.2423	1.67433	9.40068	-1.78924	254.763	0.999987	1.26654e-05	0.999998	1.6616e-06
	6	187	7	56.2816	0.220924	-0.655756	202.935	2.30736	168.487	-13.5422	112.729	3.46582e-06	0.999997	4.04842e-05	0.99996
	0.5	188	1	5.70235	0.183409	-0.736579	240.048	2.3803	177.028	9.8587	98.7813	7.86431e-07	0.999999	0.000121008	0.999879
	0.5	188	2	20.9545	0.243851	-0.612876	201.128	2.30347	170.379	-0.599627	51.5622	4.96107e-06	0.999995	1.66435e-06	0.999998
	0.5	188	3	22.155	0.285534	-0.544341	169.55	2.2293	153.35	-1.14017	22.8175	1.92993e-05	0.999981	1.18839e-05	0.999988
	0.5	188	4	29.7915	0.245935	-0.60918	207.023	2.31602	188.676	-4.11147	36.5201	4.39655e-06	0.999996	7.6817e-08	1
	0.5	188	5	36.3838	1.07336	0.0307452	87.3707	1.94137	42.3851	-6.83894	202.019	0.0283104	0.97169	0.997024	0.00297557
	0.5	188	6	37.7843	0.435596	-0.360916	96.3344	1.98378	30.5363	-32.073	219.99	0.000897251	0.999103	0.999928	7.20999e-05
	0.5	188	7	39.5955	0.16882	-0.772577	269.223	2.43011	226.442	6.48242	47.667	3.18934e-07	1	1.97654e-10	1
	0.5	188	8	45.6209	0.279282	-0.553957	168.681	2.22707	133.945	-8.13777	64.8008	1.8442e-05	0.999982	0.000623618	0.999376
	0.5	188	9	49.8747	0.145894	-0.835964	243.576	2.38664	234.116	0.726112	14.7273	3.65937e-07	1	6.30623e-12	1
	200	189	1	0	59.9969	1.77813	74.8259	1.87405	0.749514	11.6103	63.4658	1	1.14716e-09	0.909217	0.090783
	10	190	1	8.69942	10.5794	1.02446	51.1156	1.70855	9.57416	-20.911	205.717	0.999779	0.000220625	0.997867	0.00213293
	10	190	2	24.5601	35.4375	1.54946	36.6668	1.56427	7.25374	-26.6579	237.814	1	1.37068e-07	0.999805	0.000195319
	6	191	1	0	0.110465	-0.956776	208.736	2.3196	198.745	-5.19832	56.3558	4.36432e-07	1	2.19668e-06	0.999998
	6	191	2	2.13426	0.187582	-0.72681	215.534	2.33352	176.921	-9.46917	71.5818	1.52246e-06	0.999998	2.08769e-06	0.999998
	6	191	3	2.76579	0.293878	-0.531833	183.803	2.26435	67.2636	-6.14771	201.945	1.43107e-05	0.999986	0.994041	0.00595893
	6	191	4	3.72662	0.594008	-0.226207	90.0993	1.95472	44.0984	-29.8125	228.686	0.00310677	0.996893	0.999798	0.000201733
	6	191	5	6.54451	0.600261	-0.22166	85.405	1.93148	45.9567	-22.6449	218.677	0.00391028	0.99609	0.998176	0.00182399
	6	191	6	9.96267	0.648199	-0.188292	98.6003	1.99388	31.3898	-23.7767	234.963	0.00300145	0.996999	0.99952	0.000479528
	6	191	7	11.5654	13.2245	1.12138	46.1015	1.66371	9.96625	-30.448	237.357	0.999941	5.92316e-05	0.999932	6.7714e-05
	6	191	8	25.4694	0.812854	-0.0899877	146.045	2.16449	57.494	5.74506	87.5064	0.00169942	0.998301	0.595051	0.404949
	6	191	9	28.1518	31.8451	1.50304	52.3891	1.71924	8.76318	-27.4287	263.609	1	1.96241e-07	0.99995	5.00498e-05
