# Supplementary material for: Accept–reject decision-making revealed via a quantitative and ethological study of C. elegans foraging
Source: eLife. 2025 Sep 10;13:RP103191. doi: 10.7554/eLife.103191 (PMC12422737; doi:10.7554/eLife.103191)
Supplement: Figure 3—source data 5. [file elife-103191-fig3-data5.xlsx]

## Sheet: Sheet1
Figure 3 - Source Data 5
Figure 3H - Time before first exploitation
Summary Statistics
	label	OD600	growth time (hr)	relative density	# worms	saturation	time before first exploit (min)	p(only exploit)	τ	p value		* mean of mean time before first exploitation (min) for each animal
	0	0	1	0.01	8	0.8	59.9946	1	-0.411705	3.07712e-13		* in cases where no exploitation is observed (i.e. p(exploit) < 0.5 for all encounters), the last observed time point is used
	3	0.05	1	2.65804	11	0.512017	36.2175	0.272727				* p(only exploit) gives the fraction of animals that were not observed to exploit during the time window
	3	0.1	1	3.23782	14	0.494259	37.2701	0.142857				* p value calculated using Kendall's τ rank correlation coefficient (test of monotonicity)
	5	0.5	1	5.48433	13	0.446829	23.4551	0
	10	1	1	12.4594	15	0.372977	15.8715	0
	20	2	1	23.0125	15	0.317757	17.408	0.0666667
	30	3	1	34.0824	14	0.28241	14.6582	0
	50	4	1	50.3501	15	0.24729	14.39	0
	70	5	1	65.6495	15	0.22341	11.4311	0
	100	10	1	108.856	16	0.177898	6.85071	0
	400	1	48	379.454	8	0.0655141	1.14409	0
Sigmoid (y = d + (a-d)/(1 + (x/c)^b)
	a	b	c	d	r-squared
	2.33754e-14	-5.50979	3.61949	60.0987	0.471692
Source Data
	worm #	label	time before first exploit (min)	only explores		* time (min) before first exploitation (or last observed time point) for each worm
	1	30	10.2196	FALSE		* animals that only explored (i.e. p(exploit) < 0.5 for all encounters)
	2	30	25.7185	FALSE
	3	30	35.9381	FALSE
	4	30	47.1246	FALSE
	5	100	4.40136	FALSE
	6	100	33.1714	FALSE
	7	100	30.2649	FALSE
	8	100	0.728003	FALSE
	9	3	24.1514	FALSE
	10	3	30.4198	FALSE
	11	3	56.9385	FALSE
	12	3	15.2266	FALSE
	13	50	23.1016	FALSE
	14	50	15.3548	FALSE
	15	50	15.9327	FALSE
	16	70	16.2491	FALSE
	17	70	27.1022	FALSE
	18	70	47.0468	FALSE
	19	70	28.9916	FALSE
	20	5	13.0151	FALSE
	21	5	27.2418	FALSE
	22	3	37.6275	FALSE
	23	3	59.995	TRUE
	24	10	40.457	FALSE
	25	10	30.8651	FALSE
	26	10	7.16333	FALSE
	27	10	9.75858	FALSE
	28	20	26.2075	FALSE
	29	20	59.995	TRUE
	30	20	51.0702	FALSE
	31	20	43.6681	FALSE
	32	0	59.9964	TRUE
	33	0	59.9964	TRUE
	34	0	59.9964	TRUE
	35	0	59.9964	TRUE
	36	3	19.5278	FALSE
	37	3	3.51768	FALSE
	38	3	27.7024	FALSE
	39	50	5.06824	FALSE
	40	50	2.71751	FALSE
	41	50	28.1643	FALSE
	42	50	13.2541	FALSE
	43	100	5.61272	FALSE
	44	100	0	FALSE
	45	100	9.14707	FALSE
	46	100	3.33985	FALSE
	47	30	0	FALSE
	48	30	0	FALSE
	49	30	1.08923	FALSE
	50	5	30.2142	FALSE
	51	5	3.78442	FALSE
	52	5	11.0476	FALSE
	53	5	21.6562	FALSE
	54	0	59.9964	TRUE
	55	10	4.41238	FALSE
	56	10	7.37989	FALSE
	57	10	1.30593	FALSE
	58	20	5.12937	FALSE
	59	20	3.79006	FALSE
	60	20	14.1766	FALSE
	61	3	53.3764	FALSE
	62	3	26.0741	FALSE
	63	3	34.1153	FALSE
	64	70	3.27324	FALSE
	65	70	1.21704	FALSE
	66	70	0.45014	FALSE
	67	20	4.09562	FALSE
	68	20	2.15062	FALSE
	69	20	0	FALSE
	70	20	6.55188	FALSE
	71	0	59.9964	TRUE
	72	3	43.2791	FALSE
	73	3	10.6586	FALSE
	74	3	35.6102	FALSE
	75	3	22.9455	FALSE
	76	3	39.0177	FALSE
	77	3	59.9908	TRUE
	78	3	27.1195	FALSE
	79	30	16.4551	FALSE
	80	30	1.13368	FALSE
	81	30	10.3532	FALSE
	82	5	30.6477	FALSE
	83	5	8.62469	FALSE
	84	5	50.2533	FALSE
	85	5	13.9596	FALSE
	86	50	12.7648	FALSE
	87	50	1.77273	FALSE
	88	50	1.31149	FALSE
	89	50	22.0174	FALSE
	90	70	1.68941	FALSE
	91	70	0.327879	FALSE
	92	70	6.00186	FALSE
	93	70	3.64002	FALSE
	94	10	0	FALSE
	95	10	24.1847	FALSE
	96	10	4.26789	FALSE
	97	10	14.2041	FALSE
	98	100	0	FALSE
	99	100	0	FALSE
	100	100	3.55666	FALSE
	101	100	6.16302	FALSE
	102	400	0.172272	FALSE
	103	400	0.200057	FALSE
	104	400	1.95056	FALSE
	105	400	1.69493	FALSE
	106	400	1.47824	FALSE
	107	400	0	FALSE
	108	400	1.20593	FALSE
	109	400	2.45076	FALSE
	110	20	12.3924	FALSE
	111	20	1.03919	FALSE
	112	20	25.5629	FALSE
	113	20	5.29041	FALSE
	114	10	17.3165	FALSE
	115	10	23.1905	FALSE
	116	10	19.2226	FALSE
	117	10	34.344	FALSE
	118	0	59.9894	TRUE
	119	0	59.9894	TRUE
	120	50	14.8101	FALSE
	121	50	20.2618	FALSE
	122	50	21.9346	FALSE
	123	50	17.3832	FALSE
	124	30	0.4668	FALSE
	125	30	46.0021	FALSE
	126	30	5.55159	FALSE
	127	30	5.16259	FALSE
	128	3	59.9908	TRUE
	129	3	49.0041	FALSE
	130	3	59.9908	TRUE
	131	5	57.9333	FALSE
	132	5	32.8038	FALSE
	133	5	3.7344	FALSE
	134	100	4.92375	FALSE
	135	100	2.55635	FALSE
	136	100	1.69497	FALSE
	137	100	4.05126	FALSE
	138	70	8.11899	FALSE
	139	70	8.36351	FALSE
	140	70	10.5086	FALSE
	141	70	8.48577	FALSE
	142	3	59.9964	TRUE
	143	3	15.1714	FALSE
	144	3	48.7262	FALSE
