# Supplementary material for: Accept–reject decision-making revealed via a quantitative and ethological study of C. elegans foraging
Source: eLife. 2025 Sep 10;13:RP103191. doi: 10.7554/eLife.103191 (PMC12422737; doi:10.7554/eLife.103191)
Supplement: Figure 3—source data 6. [file elife-103191-fig3-data6.xlsx]

## Sheet: Sheet1
Figure 3 - Source Data 6
Figure 3I - Time before first exploitation
Summary Statistics
	label	OD600	growth time (hr)	relative density	# worms	saturation	time before first exploit (min)	p(only exploit)	τ	p value		* mean of mean time before first exploitation (min) for each animal
	0	0	1	0.01	30	0.8	59.8173	1	-0.593966	6.23784e-33		* in cases where no exploitation is observed (i.e. p(exploit) < 0.5 for all encounters), the last observed time point is used
	0.5	0.5	1	0.468996	33	0.668145	58.0835	0.939394				* p(only exploit) gives the fraction of animals that were not observed to exploit during the time window
	1	1	1	1.10472	27	0.591037	53.1959	0.740741				* p value calculated using Kendall's τ rank correlation coefficient (test of monotonicity)
	6	5	1	5.74238	32	0.442691	31.6186	0.1875
	10	10	1	9.75347	38	0.395014	30.248	0.210526
	200	1	48	228.352	31	0.11122	1.73091	0
Sigmoid (y = d + (a-d)/(1 + (x/c)^b)
	a	b	c	d	r-squared
	2.16589e-07	-8.17333	3.87594	60.0234	0.716852
Source Data
	worm #	label	time before first exploit (min)	only explores		* time (min) before first exploitation (or last observed time point) for each worm
	1	1	20.8216	FALSE		* animals that only explored (i.e. p(exploit) < 0.5 for all encounters)
	2	10	5.83992	FALSE
	3	0	59.9971	TRUE
	4	0.5	59.9977	TRUE
	5	6	15.3234	FALSE
	6	10	22.4447	FALSE
	7	0	59.9971	TRUE
	8	0.5	59.9957	TRUE
	9	1	46.6537	FALSE
	10	6	9.71444	FALSE
	11	6	21.9299	FALSE
	12	10	6.57163	FALSE
	13	0.5	59.9832	TRUE
	14	1	59.9971	TRUE
	15	6	40.498	FALSE
	16	0	59.9977	TRUE
	17	10	7.8555	FALSE
	18	1	59.9977	TRUE
	19	0.5	59.9969	TRUE
	20	200	0	FALSE
	21	10	6.80088	FALSE
	22	6	18.9724	FALSE
	23	1	55.4479	TRUE
	24	10	16.3467	FALSE
	25	0	59.9893	TRUE
	26	200	0.614851	FALSE
	27	0.5	59.9977	TRUE
	28	6	23.2143	FALSE
	29	0.5	59.7435	TRUE
	30	0	59.6177	TRUE
	31	1	39.8415	FALSE
	32	6	41.9298	FALSE
	33	10	11.7114	FALSE
	34	1	59.9991	TRUE
	35	200	9.39577	FALSE
	36	0	56.0711	TRUE
	37	6	21.4135	FALSE
	38	10	21.8674	FALSE
	39	200	0	FALSE
	40	10	59.9969	TRUE
	41	0.5	59.9977	TRUE
	42	0	59.999	TRUE
	43	1	59.9977	TRUE
	44	10	14.9419	FALSE
	45	0	59.9977	TRUE
	46	6	49.3194	FALSE
	47	0.5	59.9977	TRUE
	48	1	59.999	TRUE
	49	10	56.2024	TRUE
	50	0	59.999	TRUE
	51	200	0	FALSE
	52	10	59.9977	TRUE
	53	200	0	FALSE
	54	0	59.876	TRUE
	55	1	59.9977	TRUE
	56	6	59.9823	TRUE
	57	0	59.9977	TRUE
	58	0.5	56.1203	TRUE
	59	200	0.42726	FALSE
	60	10	7.77631	FALSE
	61	0.5	59.9976	TRUE
	62	0	59.9955	TRUE
	63	10	19.6877	FALSE
	64	0.5	59.9976	TRUE
	65	6	41.6056	FALSE
	66	10	59.9976	TRUE
	67	1	56.3162	TRUE
	68	200	0.875381	FALSE
	69	0	59.9642	TRUE
	70	10	28.7958	FALSE
	71	0	59.9976	TRUE
	72	1	58.6825	TRUE
	73	200	0	FALSE
	74	6	42.7071	FALSE
	75	0.5	59.9969	TRUE
	76	10	38.6931	FALSE
	77	6	41.6265	FALSE
	78	0.5	59.9977	TRUE
	79	0	59.997	TRUE
	80	1	59.8998	TRUE
	81	0	59.997	TRUE
	82	200	1.33597	FALSE
	83	10	48.5784	FALSE
	84	0.5	59.9991	TRUE
	85	200	2.02375	FALSE
	86	0	59.9977	TRUE
	87	0.5	29.4816	FALSE
	88	10	7.00915	FALSE
	89	6	16.997	FALSE
	90	6	29.0662	FALSE
	91	0.5	59.999	TRUE
	92	0	59.9977	TRUE
	93	10	18.283	FALSE
	94	200	0	FALSE
	95	1	59.8781	TRUE
	96	0	59.9977	TRUE
	97	6	34.8214	FALSE
	98	200	7.82615	FALSE
	99	1	19.3272	FALSE
	100	0.5	59.9372	TRUE
	101	10	21.4156	FALSE
	102	0.5	59.9059	TRUE
	103	1	49.7279	FALSE
	104	200	6.32344	FALSE
	105	10	59.9011	TRUE
	106	0.5	59.9977	TRUE
	107	200	3.40773	FALSE
	108	10	19.1187	FALSE
	109	0	59.9456	TRUE
	110	6	24.5607	FALSE
	111	1	59.9977	TRUE
	112	0.5	59.9622	TRUE
	113	10	19.2917	FALSE
	114	6	22.8469	FALSE
	115	200	0.100044	FALSE
	116	6	59.9039	TRUE
	117	200	7.3928	FALSE
	118	1	59.9977	TRUE
	119	10	59.9969	TRUE
	120	200	4.17672	FALSE
	121	10	54.6717	FALSE
	122	0.5	47.7468	TRUE
	123	0	59.9427	TRUE
	124	6	59.9977	TRUE
	125	200	0	FALSE
	126	10	35.5426	FALSE
	127	0.5	59.9977	TRUE
	128	0	59.997	TRUE
	129	1	59.997	TRUE
	130	0.5	59.8268	TRUE
	131	200	0	FALSE
	132	10	42.7447	FALSE
	133	6	15.2379	FALSE
	134	0	59.9956	TRUE
	135	1	59.7511	TRUE
	136	6	59.9977	TRUE
	137	0.5	59.9031	TRUE
	138	1	59.9977	TRUE
	139	0	59.9969	TRUE
	140	10	23.6869	FALSE
	141	200	2.64698	FALSE
	142	200	0.658605	FALSE
	143	1	59.9969	TRUE
	144	0.5	59.9977	TRUE
	145	6	33.45	FALSE
	146	10	59.5683	TRUE
	147	0	59.8573	TRUE
	148	0	59.931	TRUE
	149	6	7.70128	FALSE
	150	200	1.86744	FALSE
	151	1	59.9991	TRUE
	152	10	44.8644	FALSE
	153	0.5	59.997	TRUE
	154	200	0.460618	FALSE
	155	10	59.997	TRUE
	156	6	19.6669	FALSE
	157	1	35.5384	FALSE
	158	0.5	59.9622	TRUE
	159	6	22.5473	FALSE
	160	200	0.902456	FALSE
	161	10	20.9987	FALSE
	162	0	59.9977	TRUE
	163	10	18.2225	FALSE
	164	200	1.86118	FALSE
	165	6	59.9969	TRUE
	166	0.5	59.9977	TRUE
	167	1	58.8423	TRUE
	168	0.5	59.5662	TRUE
	169	0	59.5871	TRUE
	170	6	15.4651	FALSE
	171	1	35.7648	FALSE
	172	200	0.631525	FALSE
	173	0.5	59.9977	TRUE
	174	200	0.310545	FALSE
	175	10	7.13018	FALSE
	176	6	59.9977	TRUE
	177	1	59.8219	TRUE
	178	0.5	59.9977	TRUE
	179	200	0.175076	FALSE
	180	0	59.9977	TRUE
	181	6	14.8582	FALSE
	182	10	21.9283	FALSE
	183	0	59.7851	TRUE
	184	10	52.2456	FALSE
	185	200	0.243851	FALSE
	186	0.5	44.6632	FALSE
	187	6	14.8791	FALSE
	188	0.5	59.9977	TRUE
	189	200	0	FALSE
	190	10	8.69942	FALSE
	191	6	11.5654	FALSE
