# Supplementary material for: Accept–reject decision-making revealed via a quantitative and ethological study of C. elegans foraging
Source: eLife. 2025 Sep 10;13:RP103191. doi: 10.7554/eLife.103191 (PMC12422737; doi:10.7554/eLife.103191)
Supplement: Figure 4—source data 1. [file elife-103191-fig4-data1.xlsx]

## Sheet: Sheet1
Figure 4 - Source Data 1
Figure 4C - Coefficients of linear regression model
Summary Statistics
	coefficient	mean	std	median	2.5%	97.5%	p value		* coefficient values fit by logistic regression across 50,000 replicates as described in methods and Figure 4 - supplement 1
	β_0	-1.30556	0.166635	-1.30438	-1.64958	-0.986136	0		* p value calculated using two-tailed, one-sample bootstrap hypothesis tests with Bonferonni Correction for multiple comparisons
	β_k	2.32683	0.191285	2.32354	1.95403	2.70714	0
	β_s	2.44675	0.421968	2.42899	1.66279	3.29635	0
	β_h	-0.395407	0.15634	-0.389573	-0.721175	-0.105274	0.0266
	β_e	-0.859494	0.102967	-0.858416	-1.06845	-0.657854	0
Source Data
	encounter replicate #	bootstrap replicate #	β_0	β_k	β_s	β_h	β_e		* coefficient values for all 50,000 combinations of:
	1	1	-1.3532	2.23451	2.3459	-0.574924	-0.685614		100 replicates of probabilistic inclusion of sensed encounters (i.e. included encounters if sense = 1 ~ Bern(p(sense = 1)) where p(sense) was previously estimate in Figure 2I and Figure 2 - supplement 8)
	2	1	-1.26554	2.19096	1.8382	-0.620831	-0.671398		500 replicates of hierarchically bootstrapped worms (i.e. resampled all worms with replacement and then included all sensed encounters for those animals)
	3	1	-1.27908	2.13174	2.36062	-0.475869	-0.756004
	4	1	-1.40149	2.37568	2.58633	-0.66773	-0.703637
	5	1	-1.40772	2.11918	2.3085	-0.54595	-0.644644
	6	1	-1.31739	2.08497	2.35267	-0.499658	-0.703922
	7	1	-1.42497	2.13789	2.31192	-0.527989	-0.650554
	8	1	-1.34857	2.1358	2.44632	-0.470252	-0.723119
	9	1	-1.29393	2.09466	2.24422	-0.448252	-0.718141
	10	1	-1.35458	2.00797	2.06505	-0.446043	-0.62539
	11	1	-1.20985	2.27076	2.44242	-0.553054	-0.818897
	12	1	-1.21359	2.05209	2.2211	-0.439001	-0.759505
	13	1	-1.19248	2.13773	2.43282	-0.479966	-0.822354
	14	1	-1.47686	2.22809	2.49199	-0.5315	-0.662312
	15	1	-1.4851	2.09438	2.55847	-0.413942	-0.664533
	16	1	-1.28441	2.15173	2.19181	-0.467263	-0.74354
	17	1	-1.30849	2.32863	2.17176	-0.62333	-0.713116
	18	1	-1.2251	2.18253	2.39491	-0.512632	-0.78248
	19	1	-1.37359	2.16814	2.43269	-0.454184	-0.716159
	20	1	-1.40761	2.18185	2.47667	-0.440343	-0.727249
	21	1	-1.35994	2.02536	2.26559	-0.410595	-0.677918
	22	1	-1.25166	2.22639	2.2877	-0.564955	-0.743987
	23	1	-1.33529	2.04594	2.41417	-0.366567	-0.732604
	24	1	-1.3383	1.93079	2.29122	-0.291583	-0.697465
	25	1	-1.47769	2.10166	2.87507	-0.373665	-0.721547
	26	1	-1.3786	2.1137	1.90429	-0.558113	-0.600789
	27	1	-1.47401	1.97435	2.15218	-0.377127	-0.601899
	28	1	-1.40104	2.33126	2.38839	-0.633232	-0.688416
	29	1	-1.34219	2.13446	2.59159	-0.430292	-0.753637
	30	1	-1.31307	2.14025	2.13971	-0.524704	-0.662091
	31	1	-1.37512	2.0899	2.54266	-0.359723	-0.745515
	32	1	-1.36447	2.15388	2.48888	-0.443319	-0.74107
	33	1	-1.34703	2.24051	2.19003	-0.601517	-0.684178
	34	1	-1.2683	2.22588	2.09287	-0.598521	-0.699635
	35	1	-1.33627	2.11439	2.34523	-0.437633	-0.71819
	36	1	-1.29988	2.12697	2.14466	-0.510481	-0.686146
	37	1	-1.27192	2.05142	2.2297	-0.475054	-0.703445
	38	1	-1.1445	2.03307	1.85933	-0.462117	-0.730826
	39	1	-1.42382	2.19911	2.7389	-0.475624	-0.74754
	40	1	-1.34497	2.02017	2.74344	-0.28246	-0.786192
	41	1	-1.3155	2.07451	2.31937	-0.460715	-0.696768
	42	1	-1.27929	2.04798	1.91298	-0.511615	-0.654856
	43	1	-1.30271	2.27426	2.10596	-0.683185	-0.667707
	44	1	-1.27906	2.07706	2.00371	-0.52641	-0.675238
	45	1	-1.2308	2.18425	2.11756	-0.593026	-0.723911
	46	1	-1.28606	2.15477	2.07809	-0.605967	-0.660459
	47	1	-1.2003	1.99046	2.15239	-0.393702	-0.748982
	48	1	-1.53746	2.20285	2.46141	-0.542422	-0.619804
	49	1	-1.37736	1.99399	2.46321	-0.392036	-0.685456
	50	1	-1.32558	2.03144	2.24217	-0.464235	-0.665393
	51	1	-1.0985	2.12856	1.83499	-0.555324	-0.745438
	52	1	-1.20512	2.23913	2.45772	-0.457151	-0.859534
	53	1	-1.29062	2.00537	2.33029	-0.389925	-0.72103
	54	1	-1.39874	1.97732	2.3785	-0.331435	-0.692098
	55	1	-1.43738	2.12756	2.43742	-0.416951	-0.687974
	56	1	-1.28648	2.10581	2.03909	-0.558911	-0.658978
	57	1	-1.3575	2.26134	2.55105	-0.611786	-0.705773
	58	1	-1.32192	1.94234	2.28017	-0.316002	-0.711656
	59	1	-1.46003	2.157	2.36345	-0.429636	-0.695446
	60	1	-1.31292	1.91035	2.41667	-0.260968	-0.735099
	61	1	-1.52764	2.15603	2.50924	-0.467012	-0.656691
	62	1	-1.26969	2.00972	2.42116	-0.431168	-0.738941
	63	1	-1.40608	2.13039	2.28683	-0.470702	-0.664395
	64	1	-1.30572	2.07075	2.26006	-0.503989	-0.69182
	65	1	-1.2052	2.07188	1.93311	-0.571746	-0.688708
	66	1	-1.35082	1.93423	1.89669	-0.379045	-0.611112
	67	1	-1.44171	2.19522	2.3347	-0.581952	-0.642067
	68	1	-1.50861	2.17202	2.59314	-0.510007	-0.660169
	69	1	-1.36536	2.27479	2.25261	-0.657405	-0.658483
	70	1	-1.33545	2.17806	2.13812	-0.531827	-0.681109
	71	1	-1.27045	2.01706	1.99303	-0.472242	-0.676124
	72	1	-1.41203	2.18921	2.35169	-0.511278	-0.688078
	73	1	-1.48835	2.12643	2.60119	-0.385372	-0.706009
	74	1	-1.40409	2.17896	2.35972	-0.544863	-0.665514
	75	1	-1.45268	2.16791	2.68484	-0.437131	-0.720257
	76	1	-1.38048	2.11303	2.48045	-0.425539	-0.710482
	77	1	-1.37587	2.14183	2.4612	-0.465956	-0.711554
	78	1	-1.41905	2.16489	2.4477	-0.469543	-0.692781
	79	1	-1.46518	2.12388	2.28643	-0.455817	-0.665902
	80	1	-1.28291	2.05958	2.06047	-0.461779	-0.686265
	81	1	-1.37866	2.1833	2.44361	-0.511714	-0.696239
	82	1	-1.2434	2.20812	2.1441	-0.537741	-0.738426
	83	1	-1.38082	2.05687	2.45032	-0.439102	-0.691437
	84	1	-1.39864	2.13749	2.33845	-0.471402	-0.699216
	85	1	-1.3062	2.13919	2.19612	-0.482733	-0.710298
	86	1	-1.24148	2.15227	2.16421	-0.576881	-0.695313
	87	1	-1.29291	2.14152	2.35379	-0.432657	-0.761096
	88	1	-1.39658	2.20863	2.59033	-0.508702	-0.722329
	89	1	-1.29144	2.21119	1.93623	-0.606678	-0.683194
	90	1	-1.20623	2.20426	2.32995	-0.567103	-0.783771
	91	1	-1.42399	1.96362	2.43891	-0.310841	-0.682149
	92	1	-1.23367	2.06778	2.18196	-0.477107	-0.72293
	93	1	-1.28938	2.10972	2.48827	-0.36242	-0.797553
	94	1	-1.26721	2.10842	2.06112	-0.54893	-0.6863
	95	1	-1.37789	2.10986	2.45837	-0.460128	-0.697242
	96	1	-1.3822	2.16829	2.55567	-0.508527	-0.698565
	97	1	-1.31749	2.17724	2.55703	-0.405608	-0.786475
	98	1	-1.39985	2.1085	2.39529	-0.475436	-0.677455
	99	1	-1.53628	2.17984	2.59659	-0.408253	-0.686594
	100	1	-1.30633	1.99185	2.31262	-0.402122	-0.720529
	1	2	-1.06552	2.42782	2.01407	-0.619216	-0.895422
	2	2	-1.05346	2.44266	1.75843	-0.791393	-0.8244
	3	2	-1.3086	2.44558	2.19834	-0.58558	-0.823901
	4	2	-1.25264	2.48399	2.24135	-0.711812	-0.810475
	5	2	-1.36296	2.35387	2.18586	-0.619992	-0.741911
	6	2	-1.0935	2.17867	2.2551	-0.489844	-0.88001
	7	2	-1.18853	2.15906	2.37159	-0.372627	-0.877187
	8	2	-1.18393	2.23073	2.34155	-0.415777	-0.888869
	9	2	-1.20605	2.30578	2.09199	-0.491677	-0.84737
	10	2	-1.187	2.17905	2.16954	-0.399731	-0.837282
	11	2	-1.02047	2.43852	2.37964	-0.509949	-1.02081
	12	2	-1.12878	2.31126	2.1107	-0.557297	-0.853273
	13	2	-1.12039	2.37349	2.27581	-0.496255	-0.932349
	14	2	-1.34988	2.4501	2.26713	-0.633966	-0.779147
	15	2	-1.23871	2.16126	2.44789	-0.327978	-0.890577
	16	2	-1.12647	2.41311	2.23517	-0.587807	-0.906987
	17	2	-1.15765	2.43407	2.1459	-0.553455	-0.894085
	18	2	-1.21069	2.25764	2.27781	-0.449001	-0.866242
	19	2	-1.17316	2.40164	2.17328	-0.567513	-0.866855
	20	2	-1.19282	2.55514	2.23844	-0.717251	-0.860769
	21	2	-1.24214	2.10806	2.35684	-0.307106	-0.861095
	22	2	-1.06306	2.36461	2.34972	-0.53723	-0.947964
	23	2	-1.25449	2.35027	2.23392	-0.548321	-0.82342
	24	2	-1.10463	2.16434	2.06648	-0.406473	-0.877693
	25	2	-1.25487	2.29722	2.60094	-0.432772	-0.90233
	26	2	-1.16503	2.32328	1.7025	-0.629389	-0.762112
	27	2	-1.29962	2.21323	2.24072	-0.496335	-0.784265
	28	2	-1.21282	2.30369	2.32983	-0.479965	-0.88164
	29	2	-1.22659	2.42162	2.27267	-0.584775	-0.854412
	30	2	-1.12794	2.37462	2.14476	-0.630609	-0.843732
	31	2	-1.20755	2.34173	2.3729	-0.505126	-0.880151
	32	2	-1.21326	2.38283	2.42624	-0.513051	-0.899782
	33	2	-1.16561	2.28485	2.23316	-0.453408	-0.891819
	34	2	-1.12832	2.55245	2.17315	-0.710204	-0.878507
	35	2	-1.09766	2.37679	2.17401	-0.590107	-0.888188
	36	2	-1.19127	2.20386	2.27266	-0.327852	-0.904811
	37	2	-1.22859	2.35039	1.87299	-0.637714	-0.750316
	38	2	-1.08156	2.3355	2.08694	-0.514331	-0.914648
	39	2	-1.13477	2.28248	2.19216	-0.458287	-0.906736
	40	2	-1.2563	2.2234	2.44019	-0.420293	-0.870206
	41	2	-1.34637	2.41216	2.03096	-0.660588	-0.723707
	42	2	-1.04537	2.10081	2.16687	-0.308258	-0.94737
	43	2	-1.06884	2.31647	2.07226	-0.58638	-0.870999
	44	2	-1.3973	2.31457	1.53886	-0.595183	-0.650226
	45	2	-1.03134	2.3507	2.15765	-0.552071	-0.941128
	46	2	-1.20678	2.33339	1.89506	-0.605027	-0.775405
	47	2	-1.02422	2.3007	1.98845	-0.611632	-0.884081
	48	2	-1.22651	2.16918	2.61932	-0.310314	-0.91767
	49	2	-1.333	2.26834	2.20041	-0.472013	-0.770876
	50	2	-1.11235	2.19987	2.24176	-0.404886	-0.896011
	51	2	-0.904334	2.36703	1.75735	-0.629356	-0.921339
	52	2	-1.02191	2.38851	2.55	-0.463016	-1.0282
	53	2	-1.16495	2.15266	2.492	-0.323231	-0.92373
	54	2	-1.32797	2.35841	2.23677	-0.553389	-0.793257
	55	2	-1.27811	2.1295	2.35482	-0.259369	-0.872527
	56	2	-1.081	2.42812	1.99022	-0.697246	-0.862204
	57	2	-1.21235	2.4926	2.21001	-0.709961	-0.825244
	58	2	-1.20504	2.28703	2.16652	-0.501881	-0.840771
	59	2	-1.42441	2.27983	2.01487	-0.427474	-0.73933
	60	2	-1.28926	2.08765	2.25904	-0.290533	-0.825017
	61	2	-1.15554	2.31346	2.15183	-0.537695	-0.874389
	62	2	-1.0945	2.3261	2.2229	-0.532576	-0.908449
	63	2	-1.12688	2.33381	2.14959	-0.541564	-0.88213
	64	2	-1.08162	2.30543	2.08967	-0.574362	-0.882269
	65	2	-1.1234	2.26736	2.09258	-0.551963	-0.839824
	66	2	-1.19113	2.11062	1.95202	-0.428859	-0.777124
	67	2	-1.15505	2.4548	2.30973	-0.67696	-0.879211
	68	2	-1.29368	2.37047	2.38839	-0.534442	-0.840094
	69	2	-1.21531	2.42349	2.08076	-0.689521	-0.809122
	70	2	-1.15147	2.39177	2.33687	-0.533516	-0.898026
	71	2	-1.16388	2.24882	2.09968	-0.515833	-0.843049
	72	2	-1.27069	2.46125	2.00294	-0.650637	-0.78154
	73	2	-1.17847	2.14514	2.3933	-0.305339	-0.905955
	74	2	-1.19158	2.52455	2.2449	-0.733124	-0.8467
	75	2	-1.29479	2.44766	2.27337	-0.591872	-0.839117
	76	2	-1.15356	2.23968	2.51326	-0.393096	-0.929207
	77	2	-1.11275	2.36967	2.09862	-0.607088	-0.861138
	78	2	-1.22525	2.44378	2.15379	-0.628914	-0.829632
	79	2	-1.25306	2.41674	2.28744	-0.585824	-0.851105
	80	2	-1.17257	2.19112	2.26365	-0.368865	-0.891228
	81	2	-1.26992	2.32496	2.20596	-0.504858	-0.825741
	82	2	-1.0277	2.31171	2.1711	-0.460415	-0.960796
	83	2	-1.23133	2.32176	2.3337	-0.5036	-0.855215
	84	2	-1.1599	2.40925	2.34494	-0.569366	-0.921514
	85	2	-1.25292	2.56883	2.28171	-0.75008	-0.826941
	86	2	-1.05314	2.43904	2.08396	-0.673758	-0.886065
	87	2	-1.12164	2.38179	2.26117	-0.534398	-0.919653
	88	2	-1.13254	2.2782	2.00038	-0.551926	-0.837211
	89	2	-1.14051	2.27914	2.13766	-0.46778	-0.894481
	90	2	-1.13357	2.43669	2.26528	-0.666555	-0.866208
	91	2	-1.16332	2.29843	2.29428	-0.474923	-0.879049
	92	2	-1.24688	2.36749	2.20209	-0.616852	-0.799753
	93	2	-1.12741	2.27892	2.2779	-0.429492	-0.913871
	94	2	-1.13972	2.23833	2.07253	-0.544625	-0.827288
	95	2	-1.21619	2.36683	2.21986	-0.541	-0.8501
	96	2	-1.16001	2.26165	2.4659	-0.448973	-0.905821
	97	2	-1.08212	2.32217	2.37602	-0.491884	-0.944051
	98	2	-1.31274	2.37696	1.81216	-0.584722	-0.740865
	99	2	-1.17572	2.50277	2.29895	-0.626994	-0.911251
	100	2	-1.13923	2.02368	2.44678	-0.21909	-0.948778
	1	3	-1.5052	2.51759	2.79605	-0.321749	-0.861054
	2	3	-1.39683	2.45137	2.13361	-0.508641	-0.752395
	3	3	-1.43573	2.4184	2.49991	-0.372272	-0.813373
	4	3	-1.50991	2.44434	2.90544	-0.33635	-0.844538
	5	3	-1.48267	2.31403	2.65847	-0.337386	-0.771201
	6	3	-1.47269	2.27845	2.53605	-0.259693	-0.785695
	7	3	-1.46544	2.27183	2.87561	-0.195969	-0.860816
	8	3	-1.43861	2.37403	2.93505	-0.226954	-0.904416
	9	3	-1.51238	2.35728	2.76627	-0.196668	-0.856992
	10	3	-1.5012	2.30331	2.80111	-0.19577	-0.835249
	11	3	-1.40916	2.4931	2.64247	-0.388016	-0.870172
	12	3	-1.51053	2.37175	2.62924	-0.30249	-0.792655
	13	3	-1.42927	2.41445	2.85382	-0.310274	-0.888629
	14	3	-1.60247	2.36094	2.44595	-0.442367	-0.664891
	15	3	-1.55175	2.24246	2.73081	-0.204681	-0.787087
	16	3	-1.51567	2.42341	2.73948	-0.264218	-0.844741
	17	3	-1.3794	2.42822	2.46725	-0.305315	-0.86302
	18	3	-1.38906	2.40351	2.79519	-0.283827	-0.907026
	19	3	-1.42671	2.30545	2.65563	-0.248279	-0.840658
	20	3	-1.50862	2.45377	2.64773	-0.404626	-0.783544
	21	3	-1.44282	2.12456	2.66593	-0.201002	-0.803144
	22	3	-1.48836	2.30964	2.70448	-0.280736	-0.79528
	23	3	-1.525	2.39734	2.95784	-0.256443	-0.841858
	24	3	-1.47994	2.20287	2.81105	-0.108062	-0.850769
	25	3	-1.50342	2.28415	2.86387	-0.240742	-0.814227
	26	3	-1.46777	2.2492	2.17851	-0.373118	-0.693147
	27	3	-1.55423	2.28573	2.49129	-0.272973	-0.730648
	28	3	-1.43889	2.38817	2.72458	-0.285932	-0.864793
	29	3	-1.42037	2.46723	2.52514	-0.418982	-0.822349
	30	3	-1.41229	2.53766	2.72592	-0.430826	-0.84707
	31	3	-1.4693	2.31687	2.59833	-0.253417	-0.834083
	32	3	-1.51109	2.39876	2.75397	-0.271616	-0.842384
	33	3	-1.51076	2.40086	2.62109	-0.331078	-0.808576
	34	3	-1.52216	2.48942	2.63499	-0.396111	-0.779191
	35	3	-1.43356	2.29312	2.76527	-0.23547	-0.847055
	36	3	-1.50415	2.3015	2.81725	-0.161171	-0.8474
	37	3	-1.33043	2.27585	2.51065	-0.305064	-0.842826
	38	3	-1.45651	2.26514	2.40167	-0.266835	-0.778204
	39	3	-1.44263	2.34402	2.83786	-0.254962	-0.859235
	40	3	-1.60131	2.17276	2.83028	-0.164321	-0.747353
	41	3	-1.48678	2.43736	2.78895	-0.352926	-0.816318
	42	3	-1.28735	2.26399	2.3853	-0.246738	-0.888678
	43	3	-1.41845	2.26442	2.47884	-0.257575	-0.802525
	44	3	-1.54141	2.39027	2.4502	-0.339284	-0.753897
	45	3	-1.43705	2.33106	2.43504	-0.337488	-0.791051
	46	3	-1.3954	2.29096	2.49972	-0.358767	-0.79102
	47	3	-1.47306	2.41097	2.76782	-0.345277	-0.83275
	48	3	-1.5278	2.31794	2.83247	-0.257358	-0.804551
	49	3	-1.5092	2.25775	2.79732	-0.256885	-0.784472
	50	3	-1.41084	2.25352	2.95942	-0.131333	-0.917199
	51	3	-1.40044	2.34274	2.07683	-0.380227	-0.748389
	52	3	-1.54191	2.30358	3.21792	-0.178858	-0.883717
	53	3	-1.46085	2.19768	2.63417	-0.173183	-0.831453
	54	3	-1.52575	2.34172	2.64588	-0.321764	-0.771981
	55	3	-1.50002	2.21425	2.76892	-0.100036	-0.843864
	56	3	-1.37959	2.3619	2.452	-0.374242	-0.810374
	57	3	-1.41893	2.49231	2.59583	-0.491763	-0.798171
	58	3	-1.53502	2.296	2.67945	-0.230957	-0.789995
	59	3	-1.53706	2.42538	2.57806	-0.315398	-0.794922
	60	3	-1.49663	2.20576	2.7009	-0.0925866	-0.83893
	61	3	-1.37939	2.31885	2.45217	-0.295501	-0.829645
	62	3	-1.39227	2.36683	2.92084	-0.305432	-0.909003
	63	3	-1.58333	2.39212	2.77637	-0.341464	-0.764519
	64	3	-1.35426	2.24639	2.56973	-0.279551	-0.856911
	65	3	-1.44103	2.27168	2.43906	-0.30613	-0.774728
	66	3	-1.39075	2.27566	2.32193	-0.228202	-0.812944
	67	3	-1.41616	2.42798	2.5907	-0.383984	-0.817975
	68	3	-1.4864	2.44123	2.64812	-0.370476	-0.80921
	69	3	-1.44554	2.35685	2.35494	-0.441812	-0.734729
	70	3	-1.46229	2.42698	2.77837	-0.267428	-0.867705
	71	3	-1.45216	2.32917	2.69769	-0.2749	-0.841037
	72	3	-1.51757	2.42083	2.64145	-0.370194	-0.781492
	73	3	-1.44899	2.24435	2.80293	-0.158541	-0.867024
	74	3	-1.56731	2.46469	2.94678	-0.318107	-0.838657
	75	3	-1.50547	2.41145	2.77205	-0.296849	-0.829612
	76	3	-1.3904	2.24089	2.91129	-0.125454	-0.928481
	77	3	-1.56448	2.48597	2.7178	-0.39788	-0.771049
	78	3	-1.42866	2.42251	2.59766	-0.31648	-0.845666
	79	3	-1.4884	2.4431	2.76307	-0.361875	-0.828949
	80	3	-1.44746	2.27512	2.5247	-0.240659	-0.804056
	81	3	-1.55359	2.35109	3.09703	-0.204893	-0.858268
	82	3	-1.46741	2.35082	2.66644	-0.292444	-0.812644
	83	3	-1.56192	2.38083	2.77588	-0.307472	-0.791653
	84	3	-1.4891	2.41941	2.74375	-0.362673	-0.82649
	85	3	-1.47043	2.4638	2.58018	-0.419718	-0.792363
	86	3	-1.33043	2.47446	2.40983	-0.417787	-0.853041
	87	3	-1.36696	2.34741	2.70049	-0.281732	-0.876843
	88	3	-1.40293	2.33347	2.62542	-0.371575	-0.807472
	89	3	-1.468	2.34718	2.56204	-0.285763	-0.816612
	90	3	-1.39074	2.4372	2.68813	-0.393215	-0.847456
	91	3	-1.48247	2.26896	2.62464	-0.200342	-0.813315
	92	3	-1.55016	2.37159	2.66027	-0.309347	-0.769903
	93	3	-1.43381	2.37299	2.58637	-0.26567	-0.842229
	94	3	-1.48634	2.34377	2.48667	-0.356354	-0.753066
	95	3	-1.46948	2.35303	2.63885	-0.275629	-0.831293
	96	3	-1.40229	2.33546	2.75343	-0.296451	-0.852676
	97	3	-1.50721	2.44418	2.99474	-0.270201	-0.88136
	98	3	-1.46105	2.3318	2.57495	-0.32833	-0.789989
	99	3	-1.50886	2.42945	2.73991	-0.313254	-0.826265
	100	3	-1.42222	2.13221	2.99899	-0.0695057	-0.900081
	1	4	-1.08979	2.39215	2.80404	-0.365784	-1.07526
	2	4	-1.12164	2.38762	2.78619	-0.494507	-1.02708
	3	4	-1.29816	2.37699	2.6254	-0.438218	-0.919538
	4	4	-1.19265	2.22235	2.93682	-0.233481	-1.03862
	5	4	-1.28392	2.36149	2.97892	-0.377453	-0.977505
	6	4	-1.128	2.22944	2.70855	-0.295158	-1.02474
	7	4	-1.30314	2.22097	2.94607	-0.18919	-0.995992
	8	4	-1.1056	2.23464	3.11553	-0.246245	-1.10752
	9	4	-1.14514	2.24549	2.9856	-0.220813	-1.0704
	10	4	-1.20818	2.17297	2.8316	-0.217518	-0.990335
	11	4	-1.18292	2.32801	3.0385	-0.331414	-1.06673
	12	4	-1.05189	2.13885	2.9169	-0.194998	-1.09507
	13	4	-1.14164	2.40831	2.96847	-0.351127	-1.09357
	14	4	-1.31786	2.21887	2.743	-0.311956	-0.917561
	15	4	-1.27099	2.20738	2.96279	-0.229213	-1.01185
	16	4	-1.12172	2.21046	2.80275	-0.192729	-1.07378
	17	4	-1.03043	2.21572	2.40283	-0.297958	-1.01775
	18	4	-1.09231	2.30795	2.80382	-0.318676	-1.06626
	19	4	-1.16821	2.24779	2.92883	-0.277253	-1.04456
	20	4	-1.16464	2.39127	2.91606	-0.368826	-1.04397
	21	4	-1.1897	2.10834	2.92526	-0.1897	-1.0328
	22	4	-1.15974	2.18728	2.83342	-0.234604	-1.01759
	23	4	-1.34031	2.26932	3.26542	-0.19617	-1.03427
	24	4	-1.28184	2.15797	2.40439	-0.296093	-0.873687
	25	4	-1.14517	2.30245	3.05441	-0.343393	-1.06315
	26	4	-1.14418	2.22794	2.57865	-0.355748	-0.96964
	27	4	-1.34275	2.23817	2.72697	-0.319248	-0.905152
	28	4	-1.1485	2.47141	3.00055	-0.473192	-1.07089
	29	4	-1.25639	2.24022	3.00311	-0.210598	-1.03849
	30	4	-1.08899	2.37682	3.07229	-0.332874	-1.10045
	31	4	-1.28814	2.16659	2.98821	-0.170989	-1.00673
	32	4	-1.09973	2.33115	3.00069	-0.339787	-1.09921
	33	4	-1.12635	2.29381	2.64632	-0.416873	-0.990411
	34	4	-1.29726	2.38909	2.49013	-0.496157	-0.862784
	35	4	-1.07184	2.1339	2.79118	-0.250738	-1.03757
	36	4	-1.15778	2.22519	2.57129	-0.281224	-0.986765
	37	4	-1.16833	2.25651	3.07669	-0.21279	-1.0865
	38	4	-1.1941	2.14278	2.79048	-0.213725	-0.99462
	39	4	-1.09048	2.15929	3.03826	-0.121361	-1.12284
	40	4	-1.29933	2.17121	2.98274	-0.223722	-0.967012
	41	4	-1.19005	2.2326	2.45325	-0.300401	-0.948112
	42	4	-1.15502	2.27947	2.98763	-0.24403	-1.07035
	43	4	-1.0453	2.10363	2.61594	-0.217255	-1.02548
	44	4	-1.33145	2.29472	2.31396	-0.411438	-0.84741
	45	4	-1.25483	2.42858	2.81287	-0.425498	-0.995486
	46	4	-1.15036	2.33153	2.36936	-0.463405	-0.92436
	47	4	-1.13586	2.21052	2.82612	-0.273032	-1.03612
	48	4	-1.22569	2.27742	2.94476	-0.287505	-1.02376
	49	4	-1.14722	2.26669	2.78546	-0.374922	-0.991476
	50	4	-1.13094	2.24267	2.87493	-0.241566	-1.05483
	51	4	-1.09903	2.19471	2.58086	-0.284086	-1.01557
	52	4	-1.11174	2.24431	3.30511	-0.185831	-1.15258
	53	4	-1.05229	2.14239	2.77324	-0.253143	-1.0503
	54	4	-1.28239	2.12894	2.73945	-0.278832	-0.91364
	55	4	-1.18379	2.18363	2.88047	-0.158462	-1.04879
	56	4	-0.991634	2.22606	2.60503	-0.35619	-1.05156
	57	4	-1.25761	2.36052	2.72558	-0.480978	-0.921144
	58	4	-1.22746	2.19532	2.79403	-0.217129	-0.990414
	59	4	-1.33268	2.20232	2.77228	-0.17051	-0.96212
	60	4	-1.15288	2.11477	2.86512	-0.163348	-1.03356
	61	4	-1.22938	2.22031	2.93468	-0.192368	-1.0379
	62	4	-1.06249	2.2256	2.88617	-0.251636	-1.10059
	63	4	-1.21497	2.28883	2.82124	-0.348747	-0.994584
	64	4	-1.03732	2.15607	2.63049	-0.266162	-1.05929
	65	4	-1.12832	2.15513	2.42146	-0.364232	-0.934309
	66	4	-1.14042	2.10566	2.53073	-0.23332	-0.968504
	67	4	-1.27633	2.28883	2.97333	-0.290985	-1.00518
	68	4	-1.21952	2.28239	2.99619	-0.289955	-1.00923
	69	4	-1.10687	2.31751	2.72035	-0.448697	-1.00203
	70	4	-1.18016	2.33491	2.91723	-0.351995	-1.01823
	71	4	-1.10765	2.26413	2.68864	-0.363532	-1.01974
	72	4	-1.15748	2.25056	2.8833	-0.286584	-1.0379
	73	4	-1.20908	2.32422	3.12889	-0.276147	-1.07517
	74	4	-1.18716	2.38768	2.93556	-0.406691	-1.02326
	75	4	-1.17735	2.19874	3.18062	-0.156098	-1.08618
	76	4	-1.08468	2.16921	3.29247	-0.102353	-1.16149
	77	4	-1.10608	2.35524	2.79405	-0.422268	-1.02946
	78	4	-1.20477	2.21123	2.81217	-0.237915	-1.01894
	79	4	-1.19196	2.15998	2.85719	-0.181999	-1.04133
	80	4	-1.04722	2.1824	2.63033	-0.294325	-1.03977
	81	4	-1.21315	2.19758	2.78022	-0.249732	-0.980504
	82	4	-1.18336	2.29981	2.94183	-0.268614	-1.04686
	83	4	-1.16322	2.30618	3.24373	-0.206012	-1.12282
	84	4	-1.15894	2.17293	2.82154	-0.189404	-1.06917
	85	4	-1.12956	2.26236	2.64161	-0.416059	-0.988656
	86	4	-1.06832	2.36316	2.96209	-0.367048	-1.08382
	87	4	-1.14307	2.31142	2.81278	-0.256928	-1.06798
	88	4	-1.16518	2.27929	2.94066	-0.273233	-1.06267
	89	4	-1.1575	2.22268	2.79101	-0.258525	-1.02807
	90	4	-1.25257	2.38815	2.64501	-0.478993	-0.921726
	91	4	-1.15712	2.19683	2.5738	-0.307156	-0.972962
	92	4	-1.19728	2.17244	2.92341	-0.254023	-1.00303
	93	4	-1.20535	2.31227	2.97848	-0.241251	-1.06564
	94	4	-1.10739	2.17066	2.68319	-0.310688	-1.00368
	95	4	-1.06294	2.26807	2.74936	-0.337729	-1.04391
	96	4	-1.08967	2.19634	2.9713	-0.279349	-1.05448
	97	4	-1.05208	2.31523	3.35183	-0.199173	-1.19763
	98	4	-1.18501	2.30286	2.48757	-0.417819	-0.944416
	99	4	-1.22177	2.34475	3.19939	-0.229426	-1.09949
	100	4	-1.16806	2.14324	3.12215	-0.162291	-1.08142
	1	5	-1.44835	2.47344	2.7606	-0.542259	-0.849943
	2	5	-1.3624	2.80703	2.82652	-0.897845	-0.884516
	3	5	-1.39312	2.40853	2.69912	-0.466685	-0.873716
	4	5	-1.42387	2.49897	2.99097	-0.575285	-0.88528
	5	5	-1.4565	2.43261	2.77505	-0.526569	-0.835373
	6	5	-1.35679	2.43336	2.83888	-0.541454	-0.889432
	7	5	-1.36947	2.35192	2.93782	-0.381157	-0.931712
	8	5	-1.34998	2.36682	2.84094	-0.487856	-0.885543
	9	5	-1.48185	2.37997	2.59989	-0.468041	-0.798829
	10	5	-1.34544	2.28426	2.5413	-0.431438	-0.849519
	11	5	-1.24841	2.32927	2.86233	-0.349957	-0.996557
	12	5	-1.40416	2.33799	2.40275	-0.521016	-0.785345
	13	5	-1.34475	2.37363	2.86954	-0.418381	-0.937149
	14	5	-1.51488	2.4525	2.701	-0.567208	-0.791644
	15	5	-1.48149	2.42144	2.78411	-0.548728	-0.807633
	16	5	-1.41518	2.32823	2.76297	-0.336801	-0.895752
	17	5	-1.26088	2.52076	2.55986	-0.574027	-0.922476
	18	5	-1.29245	2.36014	2.93071	-0.405611	-0.965579
	19	5	-1.32657	2.45314	2.85173	-0.524059	-0.916854
	20	5	-1.40627	2.68879	2.87893	-0.735812	-0.877264
	21	5	-1.33451	2.28813	2.81781	-0.403851	-0.904864
	22	5	-1.32009	2.29132	2.66322	-0.432296	-0.87926
	23	5	-1.35992	2.55608	2.85695	-0.561297	-0.921689
	24	5	-1.36209	2.37075	2.6824	-0.475082	-0.870199
	25	5	-1.4234	2.38044	3.02119	-0.472692	-0.879965
	26	5	-1.36687	2.32397	2.5275	-0.528948	-0.82231
	27	5	-1.41983	2.35811	2.54623	-0.55196	-0.791194
	28	5	-1.34274	2.52922	2.68308	-0.628213	-0.885895
	29	5	-1.46073	2.51968	2.81207	-0.588539	-0.846464
	30	5	-1.31277	2.50924	2.73219	-0.58825	-0.896782
	31	5	-1.35642	2.42383	2.71573	-0.491983	-0.895248
	32	5	-1.35287	2.45364	2.77286	-0.528276	-0.902148
	33	5	-1.32988	2.29125	2.92085	-0.360578	-0.944429
	34	5	-1.36836	2.5436	2.60388	-0.667723	-0.846889
	35	5	-1.18689	2.43052	2.82369	-0.531717	-0.977247
	36	5	-1.40882	2.32944	2.8131	-0.393874	-0.883141
	37	5	-1.51026	2.55014	2.50769	-0.675085	-0.749156
	38	5	-1.26035	2.37621	2.59474	-0.550033	-0.894969
	39	5	-1.33336	2.40367	2.98691	-0.510385	-0.91989
	40	5	-1.45906	2.31182	2.89123	-0.414831	-0.842148
	41	5	-1.42152	2.43795	2.41399	-0.571747	-0.785037
	42	5	-1.27863	2.3501	2.67486	-0.456609	-0.910806
	43	5	-1.27612	2.40416	2.81048	-0.457136	-0.952883
	44	5	-1.50019	2.27201	2.17724	-0.487285	-0.707967
	45	5	-1.41331	2.68148	2.73643	-0.715807	-0.867979
	46	5	-1.35744	2.44283	2.58547	-0.566083	-0.845039
	47	5	-1.25888	2.49448	2.72411	-0.564538	-0.951246
	48	5	-1.4794	2.36893	2.9735	-0.377752	-0.881769
	49	5	-1.6065	2.50601	2.74342	-0.611267	-0.735702
	50	5	-1.29281	2.37732	2.81149	-0.405037	-0.951204
	51	5	-1.32327	2.43188	2.54335	-0.577385	-0.845815
	52	5	-1.28488	2.4478	3.03362	-0.417717	-1.00835
	53	5	-1.30423	2.23845	2.83747	-0.402913	-0.913978
	54	5	-1.4566	2.40568	2.85248	-0.560379	-0.817714
	55	5	-1.40877	2.38262	3.00944	-0.379983	-0.929674
	56	5	-1.2775	2.36979	2.52832	-0.584644	-0.863174
	57	5	-1.30649	2.57604	2.99642	-0.602446	-0.956815
	58	5	-1.35168	2.36797	2.65145	-0.475743	-0.869599
	59	5	-1.49176	2.33644	2.42679	-0.476826	-0.761012
	60	5	-1.41203	2.22365	3.04613	-0.289152	-0.904576
	61	5	-1.39765	2.45265	2.69842	-0.508264	-0.883766
	62	5	-1.26243	2.37474	2.93892	-0.457224	-0.968802
	63	5	-1.37083	2.53419	3.05024	-0.517834	-0.95741
	64	5	-1.22324	2.26707	2.79613	-0.482885	-0.937411
	65	5	-1.25355	2.16005	2.3326	-0.467945	-0.822327
	66	5	-1.30357	2.27814	2.47778	-0.470228	-0.851102
	67	5	-1.41065	2.40006	2.9181	-0.46395	-0.885417
	68	5	-1.39564	2.51781	2.83853	-0.616286	-0.862208
	69	5	-1.45218	2.36393	2.60524	-0.5315	-0.790828
	70	5	-1.39294	2.43025	2.75219	-0.470402	-0.880838
	71	5	-1.34565	2.35986	2.66203	-0.463777	-0.893592
	72	5	-1.42496	2.4695	2.30876	-0.600113	-0.789683
	73	5	-1.38732	2.31436	2.82601	-0.405461	-0.878086
	74	5	-1.33258	2.63292	2.85358	-0.708898	-0.909936
	75	5	-1.59118	2.47653	2.7565	-0.551369	-0.767255
	76	5	-1.34934	2.30769	3.03026	-0.348897	-0.956471
	77	5	-1.36819	2.46727	2.65263	-0.577792	-0.85582
	78	5	-1.34352	2.42141	2.77303	-0.511654	-0.894258
	79	5	-1.46224	2.41829	2.97156	-0.426681	-0.891061
	80	5	-1.30349	2.44704	2.5159	-0.597108	-0.865539
	81	5	-1.404	2.26625	3.1007	-0.360963	-0.912999
	82	5	-1.3175	2.48279	2.68806	-0.556978	-0.901154
	83	5	-1.38456	2.40019	2.82855	-0.472719	-0.880812
	84	5	-1.33047	2.41996	2.8081	-0.505469	-0.92685
	85	5	-1.33627	2.50386	2.77729	-0.617976	-0.882355
	86	5	-1.25811	2.48503	2.92429	-0.537063	-0.965127
	87	5	-1.32923	2.44879	2.76458	-0.4911	-0.916515
	88	5	-1.37809	2.62886	2.5507	-0.812708	-0.80108
	89	5	-1.33017	2.35334	2.68399	-0.387919	-0.932444
	90	5	-1.23439	2.53148	2.78486	-0.610592	-0.949196
	91	5	-1.41719	2.26255	2.78209	-0.379941	-0.857494
	92	5	-1.36847	2.32391	2.8495	-0.45282	-0.877443
	93	5	-1.44158	2.42932	2.82325	-0.438907	-0.881948
	94	5	-1.33796	2.49924	2.67529	-0.649015	-0.862104
	95	5	-1.32613	2.35399	2.77905	-0.461026	-0.890254
	96	5	-1.29107	2.35522	2.95903	-0.438141	-0.950932
	97	5	-1.34032	2.46324	3.02622	-0.487726	-0.949874
	98	5	-1.53177	2.47191	2.15751	-0.700916	-0.672036
	99	5	-1.43792	2.5482	2.88034	-0.559763	-0.88541
	100	5	-1.18419	2.27018	2.9498	-0.422883	-0.995134
	1	6	-1.04544	2.55219	2.24972	-0.776666	-0.918104
	2	6	-1.03992	2.55613	2.27268	-0.866119	-0.892894
	3	6	-1.13217	2.33063	2.292	-0.52153	-0.898764
	4	6	-1.24445	2.35351	2.50122	-0.537297	-0.859618
	5	6	-1.18087	2.45623	2.35182	-0.666268	-0.864415
	6	6	-1.09297	2.27517	2.43506	-0.535426	-0.914109
	7	6	-1.11353	2.36587	2.41562	-0.495301	-0.949761
	8	6	-1.19513	2.3656	2.60904	-0.529044	-0.906857
	9	6	-1.1777	2.48388	2.22152	-0.663581	-0.857644
	10	6	-1.14415	2.37509	2.18776	-0.620382	-0.842035
	11	6	-1.14935	2.54802	2.57176	-0.687367	-0.928462
	12	6	-0.95379	2.31567	2.47307	-0.58541	-0.97924
	13	6	-1.14693	2.43174	2.49186	-0.621433	-0.917713
	14	6	-1.18715	2.43971	2.35825	-0.71039	-0.840782
	15	6	-1.26918	2.4002	2.70124	-0.514328	-0.891039
	16	6	-1.15296	2.28424	2.44553	-0.391421	-0.966842
	17	6	-1.14781	2.45941	2.31063	-0.544407	-0.930777
	18	6	-1.15041	2.46117	2.44811	-0.574774	-0.933739
	19	6	-1.09492	2.45765	2.78076	-0.548773	-1.01412
	20	6	-1.19242	2.59008	2.40547	-0.734	-0.884379
	21	6	-1.1695	2.32543	2.41056	-0.548662	-0.894647
	22	6	-1.19313	2.38521	2.488	-0.551218	-0.893314
	23	6	-1.28297	2.40141	2.44382	-0.557677	-0.860336
	24	6	-1.08125	2.33832	2.12046	-0.662489	-0.863945
	25	6	-1.09058	2.52434	2.45748	-0.749211	-0.908482
	26	6	-1.18422	2.45156	1.9538	-0.772353	-0.771524
	27	6	-1.30296	2.47387	2.00075	-0.788144	-0.704202
	28	6	-1.08743	2.4131	2.50093	-0.592479	-0.944998
	29	6	-1.19607	2.51188	2.59872	-0.709743	-0.894938
	30	6	-1.16003	2.50516	2.57431	-0.699444	-0.888206
	31	6	-1.25981	2.4109	2.50198	-0.57873	-0.854923
	32	6	-1.09535	2.62716	2.57679	-0.747965	-0.967929
	33	6	-1.12559	2.37541	2.42109	-0.546435	-0.915602
	34	6	-1.18286	2.49886	2.06823	-0.756579	-0.798736
	35	6	-1.0198	2.42758	2.26755	-0.678639	-0.915914
	36	6	-1.17554	2.38291	2.2914	-0.570195	-0.867133
	37	6	-1.23476	2.42653	2.50142	-0.589717	-0.870904
	38	6	-1.19599	2.3889	2.14348	-0.629794	-0.818738
	39	6	-1.04527	2.3201	2.51867	-0.552068	-0.960137
	40	6	-1.31368	2.31414	2.39604	-0.55376	-0.800132
	41	6	-1.2086	2.39494	1.93139	-0.687559	-0.758002
	42	6	-1.11679	2.29036	2.49237	-0.469684	-0.938464
	43	6	-0.96053	2.33379	2.54436	-0.476545	-1.04387
	44	6	-1.27391	2.48961	1.85533	-0.774601	-0.725781
	45	6	-1.17141	2.52017	2.21935	-0.714664	-0.864272
	46	6	-1.11515	2.45784	2.0944	-0.764094	-0.823079
	47	6	-0.998724	2.48697	2.23132	-0.730012	-0.940331
	48	6	-1.16557	2.33727	2.56647	-0.495298	-0.935687
	49	6	-1.33108	2.37494	2.32795	-0.617557	-0.757605
	50	6	-1.02696	2.28652	2.39305	-0.512222	-0.951192
	51	6	-1.0896	2.42002	2.24467	-0.6504	-0.876964
	52	6	-1.10406	2.46882	2.63923	-0.629474	-0.971269
	53	6	-1.05951	2.31837	2.43021	-0.553921	-0.937126
	54	6	-1.21841	2.45433	2.19517	-0.681618	-0.797816
	55	6	-1.21444	2.32098	2.43317	-0.46819	-0.883693
	56	6	-1.06994	2.50673	2.13257	-0.773771	-0.883298
	57	6	-1.21599	2.54143	2.3936	-0.737682	-0.857734
	58	6	-1.28615	2.28198	2.35708	-0.483973	-0.820938
	59	6	-1.32126	2.55852	2.10739	-0.706832	-0.791476
	60	6	-1.14167	2.22416	2.53714	-0.407904	-0.92989
	61	6	-1.2395	2.28524	2.44208	-0.419379	-0.893911
	62	6	-1.02958	2.24939	2.50867	-0.46355	-0.969488
	63	6	-1.12832	2.63032	2.5736	-0.751425	-0.959998
	64	6	-1.00175	2.35928	2.37678	-0.623285	-0.954011
	65	6	-1.07418	2.36382	2.07212	-0.677389	-0.845287
	66	6	-1.15304	2.26601	2.29409	-0.502421	-0.858834
	67	6	-1.19932	2.61947	2.66239	-0.709865	-0.939993
	68	6	-1.2247	2.46027	2.43935	-0.639006	-0.863904
	69	6	-1.15943	2.52735	2.29844	-0.780494	-0.849108
	70	6	-1.11902	2.49075	2.28219	-0.685732	-0.897514
	71	6	-1.075	2.32294	2.22376	-0.645812	-0.875953
	72	6	-1.22477	2.49398	2.1641	-0.679718	-0.847626
	73	6	-1.11866	2.30282	2.65286	-0.430701	-0.962109
	74	6	-1.17646	2.58129	2.42493	-0.749646	-0.885413
	75	6	-1.25958	2.42196	2.46949	-0.586129	-0.850498
	76	6	-1.1163	2.37269	2.74565	-0.486993	-0.983265
	77	6	-1.10427	2.5624	2.37132	-0.774776	-0.892207
	78	6	-1.19797	2.4382	2.40771	-0.557537	-0.915748
	79	6	-1.29548	2.30714	2.39124	-0.482111	-0.845558
	80	6	-1.16014	2.30053	2.38595	-0.490905	-0.904117
	81	6	-1.29892	2.3919	2.53291	-0.565058	-0.827823
	82	6	-1.13953	2.40204	2.45691	-0.555792	-0.912982
	83	6	-1.21209	2.38315	2.48994	-0.56052	-0.871975
	84	6	-1.2092	2.43741	2.40083	-0.680394	-0.867933
	85	6	-1.02076	2.47337	2.34725	-0.71387	-0.946579
	86	6	-1.10051	2.48996	2.5785	-0.685332	-0.922537
	87	6	-1.0858	2.37426	2.3985	-0.497198	-0.953222
	88	6	-1.11451	2.585	2.39539	-0.735273	-0.938438
	89	6	-1.19574	2.48364	2.36209	-0.618335	-0.895786
	90	6	-1.01421	2.46902	2.50241	-0.666749	-0.974627
	91	6	-1.13095	2.22981	2.40173	-0.405057	-0.916376
	92	6	-1.21374	2.40353	2.23511	-0.666422	-0.807148
	93	6	-1.23708	2.52752	2.42767	-0.60797	-0.880988
	94	6	-1.19678	2.43171	2.29283	-0.661296	-0.836262
	95	6	-1.11854	2.58362	2.4137	-0.796993	-0.882929
	96	6	-1.15312	2.51403	2.60028	-0.706286	-0.918047
	97	6	-1.09124	2.44692	2.63655	-0.538232	-0.977812
	98	6	-1.28283	2.50507	1.97254	-0.714892	-0.757277
	99	6	-1.18493	2.48079	2.47525	-0.608546	-0.924036
	100	6	-1.13475	2.22072	2.57829	-0.440535	-0.91983
	1	7	-1.15435	2.1826	2.05123	-0.200888	-0.951523
	2	7	-1.26616	2.42092	2.13376	-0.417941	-0.884429
	3	7	-1.16379	2.29709	2.35002	-0.19389	-1.01404
	4	7	-1.33614	2.38443	2.43522	-0.218996	-0.950979
	5	7	-1.40433	2.21835	2.22645	-0.23282	-0.823593
	6	7	-1.28911	2.31418	2.55237	-0.213752	-0.965561
	7	7	-1.26434	2.23134	2.27742	-0.203768	-0.937868
	8	7	-1.16002	2.31901	2.239	-0.295983	-0.963911
	9	7	-1.3785	2.29464	1.95267	-0.205066	-0.83756
	10	7	-1.22198	2.19146	1.95161	-0.219136	-0.877229
	11	7	-1.05028	2.32922	2.43421	-0.173725	-1.10949
	12	7	-0.993417	2.16393	1.90949	-0.272861	-0.96421
	13	7	-0.994218	2.13119	2.15174	-0.183632	-1.03339
	14	7	-1.34684	2.29777	2.27967	-0.314396	-0.855245
	15	7	-1.35118	2.33976	2.40462	-0.257557	-0.901133
	16	7	-1.18341	2.37122	2.33839	-0.184096	-1.05615
	17	7	-1.22759	2.28623	2.3109	-0.13339	-0.999601
	18	7	-1.16801	2.26227	2.37728	-0.223749	-0.986942
	19	7	-1.24861	2.28541	2.57818	-0.189971	-0.992308
	20	7	-1.301	2.46455	2.50538	-0.320743	-0.960094
	21	7	-1.20247	2.20912	2.28579	-0.285354	-0.933487
	22	7	-1.166	2.36319	2.21529	-0.296636	-0.966556
	23	7	-1.24696	2.39299	2.17577	-0.333378	-0.912836
	24	7	-1.15294	2.26125	1.99539	-0.231718	-0.942507
	25	7	-1.2182	2.22337	2.61839	-0.144088	-1.0014
	26	7	-1.30303	2.27598	1.78782	-0.291482	-0.82728
	27	7	-1.22978	2.22967	2.1349	-0.24857	-0.903223
	28	7	-1.28884	2.22198	2.2591	-0.192763	-0.910174
	29	7	-1.27308	2.45184	2.32457	-0.367112	-0.933547
	30	7	-1.13998	2.33509	2.04508	-0.329978	-0.928125
	31	7	-1.2251	2.27734	2.03501	-0.268894	-0.893764
	32	7	-1.17656	2.22801	2.38021	-0.112099	-1.0347
	33	7	-1.19706	2.42252	2.05866	-0.35409	-0.951155
	34	7	-1.26544	2.29452	2.03527	-0.217352	-0.908331
	35	7	-0.929855	2.22609	2.31373	-0.216961	-1.08472
	36	7	-1.26612	2.28813	2.27394	-0.187783	-0.950234
	37	7	-1.34493	2.32453	1.84197	-0.317062	-0.813275
	38	7	-1.19491	2.22325	2.1058	-0.178622	-0.940767
	39	7	-1.22237	2.29868	2.54227	-0.209922	-0.985988
	40	7	-1.25	2.23128	2.4523	-0.145164	-0.964692
	41	7	-1.28084	2.37401	1.88588	-0.341871	-0.848952
	42	7	-1.16669	2.22929	1.87273	-0.275019	-0.894461
	43	7	-1.13629	2.21776	2.38037	-0.12557	-1.0342
	44	7	-1.33946	2.21211	1.7	-0.234942	-0.797396
	45	7	-1.19957	2.28127	2.31137	-0.178762	-0.999762
	46	7	-1.27698	2.30165	1.84395	-0.28798	-0.845113
	47	7	-1.07584	2.256	2.06685	-0.235567	-1.00211
	48	7	-1.26855	2.29024	2.38468	-0.200962	-0.958034
	49	7	-1.3495	2.18878	1.97156	-0.179791	-0.83
	50	7	-1.16655	2.24991	2.44916	-0.194779	-0.998988
	51	7	-1.05105	2.24666	2.10501	-0.202604	-1.0112
	52	7	-1.2305	2.32932	2.65388	-0.151193	-1.04989
	53	7	-1.0984	2.1752	2.41475	-0.190407	-1.00286
	54	7	-1.37843	2.39918	2.26325	-0.376359	-0.847079
	55	7	-1.28772	2.33733	2.38429	-0.218297	-0.960068
	56	7	-1.17358	2.25848	2.1233	-0.265194	-0.940509
	57	7	-1.21418	2.31324	2.62649	-0.249757	-1.0065
	58	7	-1.22075	2.20542	2.23682	-0.160496	-0.947054
	59	7	-1.43775	2.39797	1.97093	-0.322817	-0.817208
	60	7	-1.31282	2.1814	2.44567	-0.121133	-0.928259
	61	7	-1.32116	2.23214	2.23539	-0.159849	-0.920261
	62	7	-1.13096	2.22749	2.33723	-0.272304	-0.980983
	63	7	-1.24477	2.3924	2.5659	-0.304655	-0.990679
	64	7	-1.10369	2.09743	2.19209	-0.180925	-0.976967
	65	7	-1.13786	2.10116	1.86893	-0.18099	-0.922076
	66	7	-1.10056	2.17557	1.98365	-0.206173	-0.946661
	67	7	-1.30016	2.40576	2.29245	-0.321243	-0.917608
	68	7	-1.26377	2.31177	2.44015	-0.201931	-0.969778
	69	7	-1.19779	2.38282	1.98447	-0.346867	-0.911508
	70	7	-1.22806	2.30688	2.17169	-0.216473	-0.949976
	71	7	-1.16822	2.17954	2.06714	-0.222753	-0.931958
	72	7	-1.45567	2.36478	1.76298	-0.306168	-0.77614
	73	7	-1.25296	2.2254	2.27022	-0.170604	-0.943138
	74	7	-1.34835	2.34043	2.46508	-0.236897	-0.917501
	75	7	-1.40873	2.42724	2.24976	-0.301944	-0.8587
	76	7	-1.23216	2.24818	2.38073	-0.164996	-0.964682
	77	7	-1.17923	2.28724	2.31718	-0.261168	-0.959887
	78	7	-1.29412	2.3708	2.33168	-0.232663	-0.951895
	79	7	-1.32819	2.27868	2.32606	-0.229733	-0.913556
	80	7	-1.22347	2.35713	2.39845	-0.227681	-0.991027
	81	7	-1.31992	2.24286	2.49601	-0.122032	-0.951686
	82	7	-1.11931	2.31027	2.19976	-0.194551	-1.01772
	83	7	-1.32561	2.42095	2.24598	-0.35809	-0.893189
	84	7	-1.26786	2.30942	2.23257	-0.31382	-0.910826
	85	7	-1.123	2.37549	2.1933	-0.340493	-0.985096
	86	7	-1.10291	2.26848	2.06689	-0.264127	-0.959038
	87	7	-1.20724	2.29862	2.21839	-0.161666	-0.986025
	88	7	-1.19187	2.37258	2.2786	-0.326417	-0.96156
	89	7	-1.24579	2.27791	2.07063	-0.191853	-0.93592
	90	7	-1.07144	2.18221	2.32081	-0.191377	-1.00914
	91	7	-1.19568	2.12528	2.48973	-0.0745804	-0.992521
	92	7	-1.23838	2.25558	2.3591	-0.195467	-0.962486
	93	7	-1.35268	2.50556	2.36436	-0.212656	-0.98706
	94	7	-1.22317	2.35925	2.29072	-0.291004	-0.946993
	95	7	-1.17434	2.23681	2.38559	-0.18562	-0.975621
	96	7	-1.20051	2.37755	2.45978	-0.29538	-0.987288
	97	7	-1.25843	2.33665	2.4396	-0.21705	-0.973818
	98	7	-1.47954	2.34086	1.5789	-0.358986	-0.70272
	99	7	-1.30735	2.39445	2.43374	-0.222359	-0.959804
	100	7	-1.14736	2.15545	2.50137	-0.136092	-1.01852
	1	8	-1.20222	2.2639	2.56386	-0.398023	-0.849558
	2	8	-1.13236	2.37403	2.58851	-0.583751	-0.867626
	3	8	-1.17181	2.17086	2.70442	-0.223507	-0.923681
	4	8	-1.20472	2.42374	2.95421	-0.473246	-0.922081
	5	8	-1.26653	2.28522	2.68631	-0.391198	-0.841814
	6	8	-1.14044	2.15316	3.01787	-0.203972	-0.98448
	7	8	-1.16582	2.29941	2.89232	-0.404881	-0.925048
	8	8	-1.16436	2.38558	3.05535	-0.491886	-0.943508
	9	8	-1.25879	2.2803	2.52021	-0.356748	-0.848549
	10	8	-1.15838	2.08923	2.58291	-0.273236	-0.866121
	11	8	-1.11475	2.35679	3.06152	-0.301691	-1.04795
	12	8	-1.14018	2.28904	2.64481	-0.445545	-0.896445
	13	8	-1.15629	2.18329	2.77133	-0.333164	-0.910264
	14	8	-1.21647	2.35593	2.99139	-0.464437	-0.900514
	15	8	-1.35644	2.32401	3.04997	-0.399882	-0.866266
	16	8	-1.17117	2.23759	2.6929	-0.330696	-0.913325
	17	8	-1.13993	2.43834	2.65153	-0.436598	-0.937032
	18	8	-1.13675	2.17925	2.8107	-0.286839	-0.937816
	19	8	-1.12339	2.28269	3.15624	-0.263753	-1.0324
	20	8	-1.21945	2.44673	2.93834	-0.492372	-0.906527
	21	8	-1.1928	2.18566	2.81572	-0.366742	-0.891421
	22	8	-1.1028	2.1653	2.98066	-0.248498	-0.9786
	23	8	-1.26599	2.35342	2.81264	-0.427868	-0.876604
	24	8	-1.16311	2.23823	2.70103	-0.383172	-0.889795
	25	8	-1.24442	2.17738	2.99625	-0.316923	-0.884528
	26	8	-1.2693	2.23255	2.17703	-0.478193	-0.729697
	27	8	-1.35551	2.20544	2.6612	-0.370342	-0.794316
	28	8	-1.19132	2.33714	2.98188	-0.412798	-0.938664
	29	8	-1.2518	2.44496	2.98423	-0.508849	-0.903722
	30	8	-1.16579	2.36364	2.89945	-0.452026	-0.910899
	31	8	-1.27369	2.25178	3.01876	-0.315903	-0.891292
	32	8	-1.16757	2.24466	2.77375	-0.375493	-0.903106
	33	8	-1.09868	2.25255	2.68046	-0.364996	-0.932065
	34	8	-1.20804	2.33999	2.607	-0.449705	-0.858761
	35	8	-1.14611	2.27376	2.93457	-0.34232	-0.962414
	36	8	-1.21586	2.33616	2.71953	-0.421269	-0.86906
	37	8	-1.29781	2.35343	2.42698	-0.501879	-0.767296
	38	8	-1.01115	2.21171	2.67541	-0.312579	-1.00209
	39	8	-1.11818	2.14821	2.90061	-0.258676	-0.960893
	40	8	-1.35833	2.26721	2.69258	-0.464487	-0.768607
	41	8	-1.17837	2.36453	2.61213	-0.51625	-0.853487
	42	8	-1.08361	2.17975	2.78193	-0.289432	-0.975108
	43	8	-1.06461	2.22707	2.83766	-0.333819	-0.967488
	44	8	-1.24487	2.15348	2.40683	-0.361089	-0.796422
	45	8	-1.14599	2.23135	2.85868	-0.290191	-0.9594
	46	8	-1.19521	2.16323	2.86673	-0.285069	-0.900809
	47	8	-1.02918	2.18926	2.61738	-0.362302	-0.952231
	48	8	-1.25432	2.43505	3.04141	-0.496645	-0.90025
	49	8	-1.34133	2.22299	2.48082	-0.375931	-0.759357
	50	8	-1.10994	2.22355	2.85656	-0.305047	-0.961352
	51	8	-1.08123	2.29084	2.5636	-0.459105	-0.900862
	52	8	-1.15376	2.27818	2.98053	-0.352162	-0.960906
	53	8	-1.0651	2.17652	2.9964	-0.286489	-1.003
	54	8	-1.24464	2.33089	2.97195	-0.401395	-0.913764
	55	8	-1.29043	2.30916	2.94954	-0.294455	-0.91441
	56	8	-1.08115	2.25812	2.46294	-0.440542	-0.892128
	57	8	-1.10523	2.37156	2.8706	-0.448024	-0.973154
	58	8	-1.30563	2.24253	2.74081	-0.354026	-0.829813
	59	8	-1.23533	2.24205	2.67163	-0.328879	-0.893709
	60	8	-1.11184	2.14251	3.07854	-0.201898	-1.00271
	61	8	-1.25648	2.32585	2.82588	-0.395485	-0.898074
	62	8	-1.11405	2.25472	2.88525	-0.393624	-0.953025
	63	8	-1.17618	2.39781	3.03023	-0.476537	-0.935806
	64	8	-1.09393	2.24975	2.54461	-0.50235	-0.872405
	65	8	-1.16383	2.2091	2.53848	-0.393891	-0.856673
	66	8	-1.10889	2.1079	2.58405	-0.271891	-0.907749
	67	8	-1.22461	2.359	2.8407	-0.410596	-0.904106
	68	8	-1.28552	2.20202	2.95453	-0.302724	-0.872037
	69	8	-1.19041	2.24114	2.81201	-0.379788	-0.901549
	70	8	-1.16713	2.28775	2.82086	-0.343227	-0.928441
	71	8	-1.14078	2.14078	2.83124	-0.310442	-0.929348
	72	8	-1.31041	2.41376	2.24471	-0.557288	-0.748346
	73	8	-1.22505	2.2506	2.94883	-0.299929	-0.923566
	74	8	-1.1809	2.32598	2.84441	-0.39937	-0.924739
	75	8	-1.32759	2.41734	2.60421	-0.503066	-0.813605
	76	8	-1.16206	2.33427	2.74722	-0.402935	-0.925863
	77	8	-1.19141	2.36645	2.71671	-0.515181	-0.862568
	78	8	-1.168	2.30335	2.94001	-0.380923	-0.947061
	79	8	-1.26949	2.24069	2.78345	-0.364967	-0.864827
	80	8	-1.21375	2.19244	2.82063	-0.292051	-0.907457
	81	8	-1.23454	2.23535	3.00226	-0.330369	-0.910476
	82	8	-1.10546	2.18311	2.77342	-0.286221	-0.94068
	83	8	-1.11321	2.32315	3.01653	-0.387259	-0.979191
	84	8	-1.23531	2.33097	2.52558	-0.50592	-0.846447
	85	8	-1.08086	2.29207	2.76094	-0.428393	-0.954502
	86	8	-1.05581	2.27991	2.86302	-0.401254	-0.955401
	87	8	-1.19318	2.36132	2.94969	-0.363234	-0.959508
	88	8	-1.18889	2.32789	2.59573	-0.542338	-0.845449
	89	8	-1.17024	2.31596	2.8897	-0.317459	-0.974669
	90	8	-1.17578	2.27533	2.97221	-0.360209	-0.948816
	91	8	-1.24355	2.25666	2.91513	-0.324309	-0.907994
	92	8	-1.18152	2.21031	2.84461	-0.349002	-0.910602
	93	8	-1.36076	2.36987	2.76512	-0.405197	-0.816469
	94	8	-1.20758	2.36904	2.7114	-0.501432	-0.865931
	95	8	-1.08208	2.2379	3.11486	-0.225738	-1.04661
	96	8	-1.13232	2.33436	3.08495	-0.403425	-0.982862
	97	8	-1.15337	2.34108	2.80158	-0.429831	-0.913123
	98	8	-1.25622	2.30119	2.38925	-0.448624	-0.7927
	99	8	-1.27232	2.27559	2.8368	-0.33683	-0.891834
	100	8	-1.28578	2.06597	2.79674	-0.173214	-0.876235
	1	9	-0.977875	2.63576	2.0985	-0.769698	-0.986103
	2	9	-0.863419	2.71965	2.04366	-0.935934	-1.01028
	3	9	-1.00365	2.54168	2.21939	-0.59293	-1.01409
	4	9	-1.08162	2.39068	2.57306	-0.388677	-1.04223
	5	9	-1.17452	2.42817	2.26135	-0.552792	-0.897299
	6	9	-0.931472	2.58097	2.47174	-0.660759	-1.07162
	7	9	-0.943542	2.68083	2.44726	-0.680282	-1.08623
	8	9	-0.974069	2.40216	2.33113	-0.486697	-1.05385
	9	9	-1.25278	2.54835	2.0976	-0.482429	-0.919133
	10	9	-0.980636	2.38461	2.40136	-0.493732	-1.01933
	11	9	-0.924095	2.59819	2.44037	-0.662634	-1.08766
	12	9	-0.955742	2.25137	2.34025	-0.404909	-1.0385
	13	9	-0.967678	2.46284	2.40425	-0.560163	-1.0574
	14	9	-1.10912	2.59154	2.36376	-0.80038	-0.916383
	15	9	-1.04691	2.57041	2.40634	-0.57005	-1.04902
	16	9	-0.976279	2.50187	2.24362	-0.52801	-1.04036
	17	9	-0.996454	2.43746	2.43145	-0.417387	-1.07137
	18	9	-0.974621	2.38111	2.39625	-0.442233	-1.0625
	19	9	-0.984011	2.45133	2.60449	-0.438263	-1.09846
	20	9	-1.04219	2.5812	2.24426	-0.661465	-0.983884
	21	9	-0.997785	2.43782	2.32925	-0.580592	-1.00668
	22	9	-0.981411	2.25049	2.40139	-0.356005	-1.03756
	23	9	-1.02771	2.48127	2.18815	-0.56437	-0.987822
	24	9	-1.09577	2.53724	2.20922	-0.665612	-0.93496
	25	9	-1.05736	2.48743	2.46149	-0.577943	-1.00779
	26	9	-1.10392	2.56332	1.85035	-0.789723	-0.847025
	27	9	-1.08028	2.60362	2.29889	-0.697979	-0.961136
	28	9	-0.931186	2.55051	2.27026	-0.69871	-1.03456
	29	9	-1.13806	2.64932	2.41069	-0.694473	-0.967823
	30	9	-1.04161	2.46404	2.4637	-0.450876	-1.03355
	31	9	-0.994424	2.60867	2.05234	-0.7661	-0.977117
	32	9	-1.04484	2.57505	2.37423	-0.674473	-0.979858
	33	9	-0.937022	2.33789	2.55832	-0.382627	-1.10153
	34	9	-1.09551	2.52407	2.0029	-0.639094	-0.918968
	35	9	-0.849185	2.46624	2.75371	-0.458031	-1.18883
	36	9	-1.03456	2.4935	2.29282	-0.520071	-1.02431
	37	9	-1.2793	2.55032	1.80162	-0.659562	-0.794765
	38	9	-1.07429	2.6029	2.15925	-0.743499	-0.93813
	39	9	-0.930409	2.43344	2.59565	-0.523217	-1.09348
	40	9	-1.08473	2.28488	2.35195	-0.405133	-0.980756
	41	9	-0.953679	2.43221	2.71428	-0.401544	-1.14375
	42	9	-0.863913	2.55543	2.07646	-0.660986	-1.06054
	43	9	-0.887731	2.49052	2.34637	-0.560277	-1.09727
	44	9	-0.993144	2.40836	2.3988	-0.469369	-1.05147
	45	9	-0.957061	2.77729	2.18648	-0.799492	-1.05057
	46	9	-1.05815	2.63808	2.03267	-0.868004	-0.877665
	47	9	-0.799738	2.58336	2.41531	-0.654898	-1.14865
	48	9	-1.06879	2.40019	2.48731	-0.408183	-1.03235
	49	9	-1.31589	2.32337	1.6891	-0.499902	-0.740761
	50	9	-0.933682	2.54226	2.39285	-0.643861	-1.0451
	51	9	-0.915797	2.36815	1.94516	-0.52962	-0.980842
	52	9	-0.910077	2.40197	2.63867	-0.470871	-1.12532
	53	9	-0.820436	2.56033	2.39299	-0.719671	-1.09247
	54	9	-1.15722	2.46612	2.5756	-0.478152	-1.00211
	55	9	-1.13522	2.60661	2.28872	-0.668763	-0.953002
	56	9	-0.970519	2.54567	2.1574	-0.702853	-0.987407
	57	9	-1.10205	2.55536	2.19677	-0.636959	-0.950187
	58	9	-0.985795	2.41348	2.36359	-0.467269	-1.03865
	59	9	-1.087	2.49176	2.42038	-0.50236	-1.03757
	60	9	-1.02743	2.23805	2.41877	-0.291501	-1.03987
	61	9	-1.05753	2.36054	2.50334	-0.34856	-1.08077
	62	9	-0.880082	2.30218	2.63758	-0.374854	-1.13523
	63	9	-1.04381	2.64363	2.55333	-0.646111	-1.05624
	64	9	-0.903289	2.40677	2.53728	-0.487236	-1.1233
	65	9	-0.911493	2.3068	2.20407	-0.437805	-1.03987
	66	9	-0.919709	2.33178	2.18366	-0.493625	-1.00299
	67	9	-1.01673	2.45035	2.73364	-0.421874	-1.12018
	68	9	-1.11777	2.68799	2.30055	-0.856999	-0.936823
	69	9	-1.1419	2.37723	1.82539	-0.634688	-0.835602
	70	9	-0.994189	2.65499	2.29049	-0.672176	-1.03278
	71	9	-0.966061	2.32643	2.48874	-0.408657	-1.07005
	72	9	-1.21919	2.70323	1.73215	-0.772157	-0.842159
	73	9	-0.958076	2.36082	2.29365	-0.455131	-1.04032
	74	9	-1.10039	2.70648	2.61687	-0.760272	-1.00608
	75	9	-1.32661	2.51592	2.05233	-0.562041	-0.824521
	76	9	-0.982902	2.34414	2.5696	-0.337624	-1.0988
	77	9	-0.959042	2.51484	2.28112	-0.58844	-1.02759
	78	9	-1.03357	2.44851	2.23612	-0.500003	-1.01455
	79	9	-1.158	2.61216	2.29386	-0.679655	-0.955504
	80	9	-1.11404	2.4697	2.49699	-0.541398	-0.989195
	81	9	-1.18003	2.24285	2.43839	-0.314521	-0.944875
	82	9	-0.990984	2.55045	2.34162	-0.630106	-1.03522
	83	9	-1.11204	2.77685	2.26282	-0.873079	-0.946856
	84	9	-1.07395	2.62804	2.56452	-0.635335	-1.07071
	85	9	-0.91855	2.37673	2.77886	-0.363859	-1.14683
	86	9	-0.840911	2.65064	2.2323	-0.801706	-1.04499
	87	9	-1.01278	2.43229	2.14539	-0.482927	-1.01598
	88	9	-1.01287	2.79061	2.43297	-0.890633	-1.03312
	89	9	-0.921392	2.45536	2.5117	-0.446337	-1.1245
	90	9	-0.984029	2.67027	2.21957	-0.80385	-0.993009
	91	9	-1.01883	2.31965	2.38298	-0.394545	-1.02179
	92	9	-1.08058	2.36886	2.32344	-0.468369	-0.975424
	93	9	-1.24196	2.59521	2.13951	-0.518744	-0.918656
	94	9	-0.978457	2.54259	2.22419	-0.654414	-1.00475
	95	9	-0.874291	2.65421	2.35925	-0.663691	-1.11048
	96	9	-0.896992	2.51503	2.70669	-0.53095	-1.15052
	97	9	-0.914313	2.43386	2.32066	-0.513183	-1.06117
	98	9	-1.19819	2.55011	2.11342	-0.564707	-0.922397
	99	9	-1.05773	2.49054	2.73329	-0.402808	-1.10639
	100	9	-0.944602	2.46964	2.16764	-0.634512	-1.00906
	1	10	-1.29008	2.43336	2.40942	-0.559023	-0.827366
	2	10	-1.33658	2.49734	2.40642	-0.628183	-0.802251
	3	10	-1.21843	2.40089	2.48345	-0.473615	-0.91418
	4	10	-1.31681	2.31218	2.70668	-0.377461	-0.881475
	5	10	-1.38058	2.24955	2.24172	-0.491025	-0.724325
	6	10	-1.35473	2.22158	2.79542	-0.319761	-0.87381
	7	10	-1.20097	2.32787	2.35628	-0.492814	-0.869364
	8	10	-1.26866	2.27626	2.63133	-0.4052	-0.881243
	9	10	-1.34416	2.28411	2.40923	-0.383287	-0.830977
	10	10	-1.37986	2.24964	2.34673	-0.461693	-0.739167
	11	10	-1.11184	2.43386	2.55417	-0.456959	-0.993558
	12	10	-1.24936	2.28427	2.41441	-0.464446	-0.84144
	13	10	-1.10517	2.31875	2.48764	-0.47497	-0.953478
	14	10	-1.34706	2.44942	2.58942	-0.517054	-0.855068
	15	10	-1.33667	2.27526	2.71007	-0.332128	-0.881704
	16	10	-1.23231	2.34701	2.34776	-0.459104	-0.869973
	17	10	-1.21077	2.4465	2.38615	-0.513898	-0.890565
	18	10	-1.20089	2.34459	2.62365	-0.433995	-0.939427
	19	10	-1.26754	2.30611	2.65777	-0.380181	-0.893275
	20	10	-1.30096	2.35214	2.42147	-0.458193	-0.848227
	21	10	-1.26289	2.23179	2.34547	-0.446536	-0.822328
	22	10	-1.23009	2.33789	2.66114	-0.430631	-0.907148
	23	10	-1.22174	2.31963	2.57288	-0.417892	-0.905195
	24	10	-1.27526	2.29463	2.4751	-0.411453	-0.865158
	25	10	-1.23282	2.26326	2.59745	-0.39339	-0.888926
	26	10	-1.37657	2.39843	1.8987	-0.642788	-0.672936
	27	10	-1.34204	2.31077	2.47863	-0.477205	-0.80029
	28	10	-1.28373	2.33816	2.4139	-0.471069	-0.848956
	29	10	-1.24818	2.43833	2.69512	-0.53272	-0.891091
	30	10	-1.27735	2.35545	2.423	-0.506126	-0.818779
	31	10	-1.35568	2.31208	2.47854	-0.446782	-0.825314
	32	10	-1.3676	2.37466	2.64275	-0.492845	-0.826458
	33	10	-1.258	2.3298	2.57918	-0.354337	-0.926135
	34	10	-1.25895	2.32091	2.13917	-0.50009	-0.806713
	35	10	-1.08628	2.24451	2.52263	-0.334156	-0.972185
	36	10	-1.28234	2.37021	2.3842	-0.458602	-0.856104
	37	10	-1.31929	2.32258	2.3601	-0.481559	-0.794775
	38	10	-1.14579	2.32068	2.38601	-0.420907	-0.917396
	39	10	-1.34021	2.21625	2.87698	-0.283255	-0.899784
	40	10	-1.27345	2.22196	2.40465	-0.377342	-0.847216
	41	10	-1.1817	2.43628	2.59032	-0.520601	-0.920779
	42	10	-1.26496	2.31272	2.56523	-0.390694	-0.900996
	43	10	-1.1539	2.33823	2.45742	-0.454144	-0.928857
	44	10	-1.28462	2.26463	2.26436	-0.489609	-0.796101
	45	10	-1.17027	2.45101	2.28826	-0.535101	-0.916013
	46	10	-1.26948	2.39416	2.25155	-0.617551	-0.794285
	47	10	-1.1443	2.18284	2.46145	-0.309062	-0.944434
	48	10	-1.3141	2.45076	2.60718	-0.47956	-0.892508
	49	10	-1.3807	2.16753	2.48021	-0.345123	-0.77916
	50	10	-1.1883	2.29601	2.42348	-0.463369	-0.878539
	51	10	-1.17629	2.35023	2.50475	-0.424795	-0.927166
	52	10	-1.11966	2.38737	2.69024	-0.402899	-1.00752
	53	10	-1.13932	2.23378	2.42164	-0.418375	-0.903953
	54	10	-1.32517	2.35146	2.48233	-0.492365	-0.826393
	55	10	-1.25985	2.34317	2.47531	-0.41898	-0.875189
	56	10	-1.25396	2.30273	2.24435	-0.554242	-0.797184
	57	10	-1.23963	2.34402	2.56702	-0.465457	-0.880876
	58	10	-1.22523	2.19417	2.5315	-0.334261	-0.884232
	59	10	-1.36097	2.3352	2.56693	-0.392173	-0.862532
	60	10	-1.26001	2.15938	2.52522	-0.283603	-0.886879
	61	10	-1.28824	2.20955	2.75676	-0.24847	-0.929737
	62	10	-1.20148	2.3504	2.80924	-0.476717	-0.943815
	63	10	-1.38165	2.42286	2.39914	-0.548804	-0.795611
	64	10	-1.16536	2.33104	2.19379	-0.581588	-0.844615
	65	10	-1.19709	2.30895	2.34009	-0.475681	-0.864395
	66	10	-1.21107	2.20658	2.44863	-0.349492	-0.873296
	67	10	-1.27855	2.39088	2.53388	-0.491334	-0.878755
	68	10	-1.3356	2.44077	2.56685	-0.568177	-0.840456
	69	10	-1.3803	2.4279	2.23853	-0.585342	-0.768782
	70	10	-1.31018	2.31189	2.49937	-0.396853	-0.858196
	71	10	-1.22114	2.21003	2.32227	-0.375665	-0.862232
	72	10	-1.22703	2.4541	2.22341	-0.571451	-0.855296
	73	10	-1.30253	2.23159	2.59655	-0.28474	-0.895448
	74	10	-1.34437	2.25608	2.38713	-0.426737	-0.795486
	75	10	-1.37043	2.42468	2.37961	-0.535234	-0.790902
	76	10	-1.25008	2.30459	2.44474	-0.42893	-0.861642
	77	10	-1.29719	2.44657	2.62308	-0.566828	-0.851406
	78	10	-1.33258	2.3527	2.54983	-0.431047	-0.855871
	79	10	-1.30685	2.40599	2.4229	-0.575518	-0.822053
	80	10	-1.25587	2.40728	2.43525	-0.537947	-0.853183
	81	10	-1.35379	2.28023	2.65769	-0.396611	-0.830989
	82	10	-1.15486	2.36691	2.39743	-0.466616	-0.922352
	83	10	-1.29277	2.45951	2.61076	-0.57182	-0.857307
	84	10	-1.28722	2.61639	2.65794	-0.70767	-0.887949
	85	10	-1.24162	2.27336	2.6655	-0.420458	-0.871243
	86	10	-1.21853	2.38943	2.67168	-0.555368	-0.874376
	87	10	-1.19904	2.31319	2.40715	-0.415939	-0.893775
	88	10	-1.35276	2.44517	2.68668	-0.597593	-0.824409
	89	10	-1.29968	2.33127	2.34228	-0.452913	-0.840744
	90	10	-1.15912	2.28008	2.54722	-0.470818	-0.90247
	91	10	-1.25776	2.13614	2.47504	-0.268593	-0.866815
	92	10	-1.30133	2.25472	2.46439	-0.415959	-0.827557
	93	10	-1.22028	2.27717	2.64947	-0.281502	-0.956557
	94	10	-1.19568	2.25617	2.24903	-0.478877	-0.834037
	95	10	-1.23874	2.38345	2.83289	-0.436839	-0.939864
	96	10	-1.16587	2.42029	2.53733	-0.543301	-0.916596
	97	10	-1.26716	2.33549	2.56954	-0.413076	-0.888868
	98	10	-1.27501	2.24329	2.22017	-0.365777	-0.840475
	99	10	-1.37264	2.27971	2.52823	-0.314843	-0.871906
	100	10	-1.25139	2.33561	2.33594	-0.538666	-0.830071
	1	11	-1.01894	2.05006	1.83449	-0.526934	-0.817482
	2	11	-1.14558	2.23274	2.04608	-0.614824	-0.812784
	3	11	-1.16375	2.09368	1.91848	-0.476217	-0.800263
	4	11	-1.11955	2.21904	2.12971	-0.547656	-0.847321
	5	11	-1.26916	2.12838	2.17207	-0.482581	-0.758283
	6	11	-1.11004	1.92625	2.2797	-0.301234	-0.868889
	7	11	-1.17596	1.95531	2.09407	-0.375493	-0.796633
	8	11	-1.05463	1.97743	2.12396	-0.388403	-0.866707
	9	11	-1.18125	2.04741	1.88005	-0.407293	-0.784569
	10	11	-1.11303	1.88156	1.8397	-0.370781	-0.77135
	11	11	-1.03509	2.15127	2.18307	-0.425623	-0.939429
	12	11	-1.04921	2.02677	1.927	-0.454972	-0.837745
	13	11	-0.93839	2.0792	2.0035	-0.499236	-0.921045
	14	11	-1.27599	2.06159	2.04073	-0.520748	-0.723513
	15	11	-1.15433	2.05833	2.02432	-0.396192	-0.8355
	16	11	-1.12885	2.02147	1.89847	-0.384102	-0.814022
	17	11	-1.11274	2.17804	1.78535	-0.510506	-0.815691
	18	11	-1.09336	2.18591	1.98389	-0.566926	-0.821303
	19	11	-1.19968	2.09286	2.39806	-0.380811	-0.877075
	20	11	-1.11402	2.20911	2.03352	-0.610052	-0.810166
	21	11	-1.12276	1.92391	2.17914	-0.31577	-0.853165
	22	11	-1.0779	2.08429	2.10323	-0.416885	-0.871427
	23	11	-1.19771	2.05444	2.20976	-0.36901	-0.840113
	24	11	-1.26731	1.96041	1.80955	-0.392797	-0.705465
	25	11	-1.20942	2.01883	2.30522	-0.364442	-0.824802
	26	11	-1.0073	1.96779	1.67758	-0.507268	-0.778535
	27	11	-1.21504	1.99479	1.75227	-0.43944	-0.711311
	28	11	-1.12448	2.1656	2.17329	-0.48425	-0.881541
	29	11	-1.11261	2.07134	2.13289	-0.445507	-0.85459
	30	11	-1.10675	2.18496	1.94794	-0.596594	-0.791338
	31	11	-1.21708	2.04086	2.19724	-0.37092	-0.817349
	32	11	-1.04377	1.98176	2.18126	-0.348135	-0.906129
	33	11	-1.01738	1.97159	2.04719	-0.38229	-0.886026
	34	11	-1.27914	2.23413	1.65973	-0.683795	-0.655597
	35	11	-1.01256	1.99855	2.13004	-0.425839	-0.865135
	36	11	-1.12165	1.90417	2.11057	-0.283874	-0.849341
	37	11	-1.10426	1.98332	1.88713	-0.407705	-0.792124
	38	11	-1.10245	2.01934	1.74346	-0.490947	-0.763807
	39	11	-1.13833	2.00802	2.25292	-0.370333	-0.856347
	40	11	-1.30396	1.94914	2.17412	-0.320795	-0.747954
	41	11	-1.13983	2.03892	1.94133	-0.464494	-0.777805
	42	11	-1.06517	1.88706	2.09386	-0.287101	-0.870903
	43	11	-1.10267	1.98325	2.02164	-0.397606	-0.815692
	44	11	-1.14959	2.02058	1.63513	-0.480079	-0.746024
	45	11	-1.01051	2.12365	1.90806	-0.51422	-0.879342
	46	11	-1.10018	2.07541	1.73328	-0.604532	-0.735963
	47	11	-0.986766	2.02867	1.80102	-0.504529	-0.830258
	48	11	-1.16835	1.98705	2.10848	-0.383752	-0.802848
	49	11	-1.34298	2.12474	1.97003	-0.504442	-0.694271
	50	11	-1.10867	1.83781	2.22102	-0.233586	-0.855151
	51	11	-1.02153	2.05335	1.79054	-0.462235	-0.831756
	52	11	-0.983176	2.12302	2.25269	-0.389935	-0.97048
	53	11	-1.01299	1.83703	2.14098	-0.272351	-0.884222
	54	11	-1.23305	2.05741	1.90038	-0.464739	-0.728374
	55	11	-1.17797	1.93087	2.1765	-0.276476	-0.823986
	56	11	-1.07903	2.11667	1.79276	-0.531147	-0.817007
	57	11	-1.27423	2.31332	1.83188	-0.742412	-0.680726
	58	11	-1.11872	1.9109	2.07117	-0.314766	-0.822499
	59	11	-1.17143	2.0962	1.93804	-0.435432	-0.811292
	60	11	-1.24262	1.81352	2.18858	-0.184002	-0.809016
	61	11	-1.14448	2.1078	1.95391	-0.480868	-0.809545
	62	11	-1.0162	2.02552	2.08253	-0.460954	-0.881853
	63	11	-1.25037	2.00772	2.33278	-0.35775	-0.815135
	64	11	-0.965363	1.89213	1.98173	-0.362476	-0.881866
	65	11	-1.05136	2.01375	1.70084	-0.507535	-0.776999
	66	11	-1.06529	1.89451	1.82916	-0.358373	-0.807711
	67	11	-1.10336	2.03699	2.19501	-0.453986	-0.845999
	68	11	-1.26932	2.20533	2.13015	-0.580006	-0.757824
	69	11	-1.1694	2.01832	1.76036	-0.519804	-0.723285
	70	11	-1.18958	2.06467	2.24065	-0.322304	-0.877626
	71	11	-1.01482	1.94357	1.86934	-0.420457	-0.838582
	72	11	-1.14725	2.13986	1.95705	-0.444665	-0.846984
	73	11	-1.21884	1.96261	2.34125	-0.284681	-0.847233
	74	11	-1.15702	2.14234	2.27942	-0.495738	-0.844704
	75	11	-1.2002	2.13177	2.01661	-0.465228	-0.779574
	76	11	-1.06997	1.97597	2.37067	-0.279661	-0.925315
	77	11	-1.09902	2.10941	2.0664	-0.487145	-0.83111
	78	11	-1.22045	2.11059	2.12261	-0.426477	-0.822325
	79	11	-1.20003	2.03776	2.12548	-0.372871	-0.828292
	80	11	-1.06861	2.00414	1.95977	-0.383601	-0.849264
	81	11	-1.23342	2.07774	2.21725	-0.429088	-0.791134
	82	11	-0.993568	2.01712	2.08785	-0.386276	-0.905337
	83	11	-1.26584	2.06629	2.24086	-0.435713	-0.783805
	84	11	-1.1748	2.10455	2.07172	-0.495084	-0.815334
	85	11	-1.07809	2.17819	2.05512	-0.50455	-0.864509
	86	11	-1.04217	2.1403	2.15105	-0.551399	-0.868597
	87	11	-1.02817	2.01882	2.01591	-0.353547	-0.885381
	88	11	-1.16493	2.13715	1.94914	-0.530996	-0.78795
	89	11	-1.07702	2.02837	2.01503	-0.379909	-0.8865
	90	11	-1.22502	2.2156	1.90215	-0.612077	-0.752967
	91	11	-1.14401	1.95357	2.11648	-0.343941	-0.809126
	92	11	-1.09305	1.99984	1.99027	-0.41731	-0.81731
	93	11	-1.14239	2.1084	2.14485	-0.323157	-0.907123
	94	11	-1.09434	2.03217	1.95142	-0.455712	-0.814588
	95	11	-1.09857	2.04042	2.027	-0.400526	-0.847696
	96	11	-1.09015	2.13073	2.20175	-0.479969	-0.864743
	97	11	-1.17028	2.12453	2.22263	-0.425708	-0.853033
	98	11	-1.17826	2.01017	1.83998	-0.430103	-0.760096
	99	11	-1.21039	2.11052	2.2208	-0.438063	-0.832298
	100	11	-1.01737	1.83974	2.25765	-0.236207	-0.915617
	1	12	-1.17108	2.23322	2.55789	-0.215469	-1.00597
	2	12	-1.12778	2.49154	2.47011	-0.51299	-0.993039
	3	12	-1.45957	2.24296	2.64987	-0.148237	-0.897427
	4	12	-1.35565	2.43981	2.914	-0.295144	-0.985788
	5	12	-1.31429	2.22891	2.62968	-0.247605	-0.910786
	6	12	-1.24343	2.18765	2.98542	-0.0913617	-1.05024
	7	12	-1.15996	2.13147	2.33091	-0.15298	-0.968781
	8	12	-1.15191	2.30608	2.60487	-0.243366	-1.02278
	9	12	-1.14315	2.17274	2.22653	-0.20505	-0.953296
	10	12	-1.16807	2.1508	2.25909	-0.227727	-0.91774
	11	12	-1.24384	2.34701	2.89393	-0.198222	-1.03749
	12	12	-1.09505	2.21712	2.3118	-0.313191	-0.957768
	13	12	-1.15611	2.15495	2.63683	-0.172989	-1.01827
	14	12	-1.37878	2.34814	2.73526	-0.326282	-0.900894
	15	12	-1.38325	2.4395	3.14304	-0.25895	-1.00349
	16	12	-1.25415	2.27657	2.68943	-0.133138	-1.03463
	17	12	-1.1982	2.32055	2.55175	-0.196393	-1.0097
	18	12	-1.12859	2.25931	2.63639	-0.154501	-1.05564
	19	12	-1.19283	2.3508	2.86236	-0.229884	-1.05593
	20	12	-1.26946	2.52497	2.44804	-0.482223	-0.915805
	21	12	-1.24763	2.21883	2.35498	-0.290375	-0.905091
	22	12	-1.21935	2.3164	2.57161	-0.238084	-0.972462
	23	12	-1.3922	2.38574	2.60491	-0.312136	-0.895953
	24	12	-1.32749	2.22165	2.2426	-0.255096	-0.855638
	25	12	-1.24105	2.24096	3.0191	-0.141195	-1.03976
	26	12	-1.27454	2.16682	1.95902	-0.32356	-0.800233
	27	12	-1.20876	2.05188	2.29669	-0.252999	-0.876143
	28	12	-1.15815	2.28654	2.53964	-0.220335	-1.01228
	29	12	-1.4918	2.43684	2.89193	-0.359701	-0.885101
	30	12	-1.14871	2.39538	2.3088	-0.414068	-0.948133
	31	12	-1.33129	2.367	2.69787	-0.216459	-0.962304
	32	12	-1.28387	2.28989	3.01133	-0.154068	-1.0361
	33	12	-1.28135	2.35853	2.78916	-0.269235	-0.993544
	34	12	-1.36762	2.36534	2.24827	-0.336497	-0.85028
	35	12	-1.16836	2.25857	2.53174	-0.28549	-0.969494
	36	12	-1.24707	2.28352	2.64283	-0.187383	-0.991462
	37	12	-1.33165	2.37723	2.83854	-0.309469	-0.94274
	38	12	-1.09711	2.11923	2.22513	-0.226153	-0.949515
	39	12	-1.24662	2.27472	2.96927	-0.229044	-1.01139
	40	12	-1.39665	2.12239	2.48952	-0.18806	-0.843112
	41	12	-1.25917	2.41675	2.74079	-0.335662	-0.979875
	42	12	-1.15184	2.20052	2.1665	-0.2783	-0.923119
	43	12	-1.18476	2.14533	2.78933	0.00630946	-1.09123
	44	12	-1.30425	2.15244	2.21416	-0.201501	-0.872211
	45	12	-1.17941	2.19527	2.254	-0.222035	-0.962701
	46	12	-1.24385	2.25751	2.3549	-0.279676	-0.906437
	47	12	-1.03362	2.19101	2.16615	-0.299799	-0.976832
	48	12	-1.30343	2.29513	2.6008	-0.2151	-0.947431
	49	12	-1.44045	2.25389	2.73929	-0.174348	-0.885749
	50	12	-1.1538	2.19061	2.64752	-0.12893	-1.03573
	51	12	-1.15721	2.30987	2.48811	-0.276407	-0.990144
	52	12	-1.18139	2.37986	3.08628	-0.0759824	-1.15179
	53	12	-1.20943	2.17791	2.6163	-0.198599	-0.961776
	54	12	-1.27136	2.42273	2.56874	-0.356117	-0.944222
	55	12	-1.25781	2.23156	2.76022	-0.0872068	-1.01495
	56	12	-1.19491	2.33235	2.60466	-0.321956	-0.983283
	57	12	-1.50102	2.41791	2.68804	-0.40416	-0.824198
	58	12	-1.15892	2.1047	2.05008	-0.21189	-0.894437
	59	12	-1.28729	2.41498	2.67063	-0.214333	-1.01183
	60	12	-1.2522	2.12957	2.93893	-0.0399719	-1.03462
	61	12	-1.3575	2.25502	2.7796	-0.134933	-0.970194
	62	12	-1.10054	2.26832	2.4826	-0.374758	-0.970589
	63	12	-1.34287	2.20928	2.66578	-0.237577	-0.921434
	64	12	-1.10343	2.06684	2.39082	-0.16578	-0.992921
	65	12	-1.14887	2.06707	2.09656	-0.227233	-0.893682
	66	12	-1.16691	2.12011	2.34663	-0.211092	-0.928033
	67	12	-1.35326	2.28579	2.9784	-0.133683	-1.00153
	68	12	-1.35842	2.33909	2.7997	-0.245453	-0.946407
	69	12	-1.33334	2.24319	2.54046	-0.263039	-0.893582
	70	12	-1.23085	2.15205	2.55901	-0.058252	-1.00472
	71	12	-1.09862	2.16167	2.10623	-0.301361	-0.920469
	72	12	-1.38417	2.33539	2.44091	-0.248063	-0.907343
	73	12	-1.29344	2.23967	2.83652	-0.124045	-0.996883
	74	12	-1.35187	2.39123	2.86848	-0.300216	-0.96109
	75	12	-1.42715	2.39142	2.7817	-0.342838	-0.896487
	76	12	-1.22895	2.24022	3.11444	-0.00252678	-1.11657
	77	12	-1.3112	2.33359	2.84397	-0.310308	-0.94936
	78	12	-1.23864	2.42426	2.72254	-0.267594	-1.0246
	79	12	-1.38154	2.35835	2.73976	-0.250046	-0.944743
	80	12	-1.20928	2.27382	2.80095	-0.154664	-1.04797
	81	12	-1.35961	2.29678	2.95012	-0.149452	-0.982546
	82	12	-1.19787	2.34108	2.69921	-0.182739	-1.05412
	83	12	-1.41115	2.55195	2.91378	-0.391323	-0.944554
	84	12	-1.42293	2.30925	2.76005	-0.305936	-0.899443
	85	12	-1.31389	2.39172	2.63864	-0.36685	-0.92213
	86	12	-1.12729	2.24497	2.62274	-0.282305	-0.986792
	87	12	-1.17572	2.30442	2.57328	-0.111406	-1.05342
	88	12	-1.23402	2.43476	2.7894	-0.336808	-1.0109
	89	12	-1.20523	2.16385	2.29289	-0.201316	-0.932897
	90	12	-1.13965	2.27834	2.5959	-0.242474	-1.02046
	91	12	-1.2549	2.17019	2.82953	-0.106738	-1.00298
	92	12	-1.28364	2.18566	2.55873	-0.158051	-0.940911
	93	12	-1.22333	2.39295	3.05705	-0.134916	-1.10116
	94	12	-1.30748	2.3375	2.60092	-0.248963	-0.945819
	95	12	-1.23375	2.26103	2.96525	-0.142713	-1.0311
	96	12	-1.30036	2.37099	3.05823	-0.256057	-1.01852
	97	12	-1.20051	2.39219	2.71432	-0.244575	-1.03585
	98	12	-1.26614	2.39792	2.77518	-0.253867	-1.02297
	99	12	-1.32253	2.40985	2.96745	-0.262676	-1.01893
	100	12	-1.25373	2.19809	2.96666	-0.123095	-1.03112
	1	13	-1.38776	2.56681	2.15938	-0.522174	-0.875208
	2	13	-1.34	2.5779	2.04113	-0.619283	-0.852593
	3	13	-1.43524	2.45107	2.18381	-0.386571	-0.863088
	4	13	-1.39645	2.54116	2.44843	-0.447684	-0.926304
	5	13	-1.43229	2.44023	2.08206	-0.485105	-0.813557
	6	13	-1.3848	2.3109	2.54681	-0.218554	-0.94863
	7	13	-1.30234	2.45321	2.37045	-0.385522	-0.967976
	8	13	-1.32581	2.38842	2.36115	-0.358707	-0.929415
	9	13	-1.40326	2.54515	2.09197	-0.492979	-0.872796
	10	13	-1.35553	2.4314	2.17394	-0.402095	-0.887487
	11	13	-1.17287	2.44394	2.46698	-0.267441	-1.08177
	12	13	-1.3108	2.5071	1.95023	-0.52057	-0.867509
	13	13	-1.23216	2.45439	2.28813	-0.398407	-0.983469
	14	13	-1.48666	2.58456	2.41397	-0.522855	-0.859526
	15	13	-1.4594	2.36668	2.41303	-0.279724	-0.899048
	16	13	-1.36906	2.36474	2.25923	-0.298989	-0.917252
	17	13	-1.31492	2.62386	2.16818	-0.509303	-0.93245
	18	13	-1.31329	2.4289	2.40109	-0.358899	-0.959688
	19	13	-1.34247	2.46994	2.50266	-0.347898	-0.973907
	20	13	-1.41463	2.55893	2.24965	-0.481198	-0.879658
	21	13	-1.37423	2.30128	2.31259	-0.345046	-0.895479
	22	13	-1.2275	2.47895	2.43244	-0.35653	-1.01635
	23	13	-1.37945	2.50281	2.31067	-0.414448	-0.91326
	24	13	-1.38405	2.44818	2.15247	-0.439548	-0.868665
	25	13	-1.36705	2.47054	2.43845	-0.424847	-0.9127
	26	13	-1.39271	2.53755	1.80801	-0.569235	-0.799483
	27	13	-1.46401	2.38541	2.09161	-0.43737	-0.798434
	28	13	-1.35426	2.39103	2.46888	-0.310823	-0.956053
	29	13	-1.48696	2.43243	2.27014	-0.371653	-0.851062
	30	13	-1.31578	2.48982	2.15257	-0.483397	-0.887324
	31	13	-1.39242	2.55943	2.176	-0.505641	-0.877123
	32	13	-1.34261	2.52603	2.33194	-0.495422	-0.918189
	33	13	-1.31494	2.34577	2.31064	-0.293156	-0.949231
	34	13	-1.41196	2.48943	2.02124	-0.504896	-0.822117
	35	13	-1.36414	2.56964	2.23256	-0.524755	-0.883285
	36	13	-1.33739	2.52398	2.21468	-0.438258	-0.919944
	37	13	-1.36908	2.53973	2.05706	-0.546481	-0.841546
	38	13	-1.32878	2.56058	2.02534	-0.491612	-0.895589
	39	13	-1.35495	2.39026	2.41724	-0.32312	-0.935386
	40	13	-1.43331	2.4629	2.29663	-0.439906	-0.852508
	41	13	-1.3964	2.44115	1.95481	-0.471747	-0.801778
	42	13	-1.21239	2.24952	2.20849	-0.231679	-0.980367
	43	13	-1.28631	2.50704	2.25353	-0.435208	-0.961437
	44	13	-1.50185	2.46582	1.7101	-0.530489	-0.72835
	45	13	-1.24179	2.51949	2.10408	-0.413179	-0.974362
	46	13	-1.32521	2.38921	2.08745	-0.436732	-0.864789
	47	13	-1.23163	2.23812	2.18774	-0.256236	-0.958018
	48	13	-1.38049	2.45236	2.43618	-0.376085	-0.919134
	49	13	-1.51231	2.39703	2.04197	-0.396409	-0.777693
	50	13	-1.30758	2.19726	2.52905	-0.100638	-1.00183
	51	13	-1.22871	2.44412	2.02226	-0.470688	-0.911696
	52	13	-1.29809	2.48126	2.47618	-0.328482	-1.00722
	53	13	-1.304	2.37553	2.47054	-0.319637	-0.969242
	54	13	-1.40022	2.54574	2.2765	-0.509502	-0.87989
	55	13	-1.36728	2.3429	2.4349	-0.218113	-0.952967
	56	13	-1.31569	2.48459	2.09417	-0.499669	-0.89222
	57	13	-1.37844	2.48411	2.14952	-0.534768	-0.836446
	58	13	-1.39764	2.3978	2.19329	-0.34502	-0.888586
	59	13	-1.52246	2.35288	2.04287	-0.311964	-0.806334
	60	13	-1.44652	2.30521	2.30821	-0.212531	-0.891527
	61	13	-1.39823	2.43904	2.23386	-0.384266	-0.901512
	62	13	-1.28816	2.37525	2.49594	-0.325005	-0.989608
	63	13	-1.36725	2.46909	2.41353	-0.418269	-0.930704
	64	13	-1.21035	2.37731	2.15588	-0.463179	-0.939215
	65	13	-1.32725	2.43953	1.94779	-0.551502	-0.813777
	66	13	-1.30164	2.35512	2.01644	-0.336678	-0.885213
	67	13	-1.30454	2.61166	2.26593	-0.562313	-0.920333
	68	13	-1.4845	2.45134	2.23518	-0.44385	-0.825644
	69	13	-1.42871	2.46777	1.93803	-0.559428	-0.7747
	70	13	-1.36452	2.4732	2.24535	-0.387361	-0.917273
	71	13	-1.25322	2.47289	2.05305	-0.499405	-0.908814
	72	13	-1.43265	2.5059	1.90621	-0.541977	-0.803161
	73	13	-1.37998	2.3108	2.37392	-0.228375	-0.940676
	74	13	-1.43993	2.49854	2.20307	-0.46808	-0.851537
	75	13	-1.49093	2.5528	2.19038	-0.513696	-0.819052
	76	13	-1.34541	2.44251	2.31854	-0.361082	-0.93545
	77	13	-1.37549	2.46403	2.2521	-0.465532	-0.870625
	78	13	-1.40886	2.56702	2.33476	-0.434692	-0.919154
	79	13	-1.42093	2.45762	2.34209	-0.391396	-0.908711
	80	13	-1.31392	2.33717	2.45014	-0.215458	-0.992513
	81	13	-1.38589	2.48672	2.37938	-0.433475	-0.905818
	82	13	-1.19751	2.45125	2.20715	-0.404435	-0.982174
	83	13	-1.47949	2.47463	2.2368	-0.407374	-0.840759
	84	13	-1.37386	2.57955	2.15771	-0.580388	-0.885759
	85	13	-1.32548	2.46796	2.23151	-0.477062	-0.887321
	86	13	-1.3038	2.50258	2.34938	-0.433148	-0.943432
	87	13	-1.31465	2.38483	2.27364	-0.317699	-0.932995
	88	13	-1.31334	2.58543	2.25255	-0.58817	-0.909333
	89	13	-1.35937	2.58997	2.23886	-0.4721	-0.934806
	90	13	-1.30945	2.49393	2.34809	-0.481673	-0.932268
	91	13	-1.32089	2.3699	2.37792	-0.349492	-0.930944
	92	13	-1.40913	2.40201	2.18643	-0.417394	-0.846808
	93	13	-1.33327	2.52189	2.29816	-0.367669	-0.954997
	94	13	-1.30897	2.49284	2.16696	-0.49255	-0.898306
	95	13	-1.33962	2.48048	2.34779	-0.422342	-0.924724
	96	13	-1.35799	2.55018	2.36934	-0.521999	-0.906797
	97	13	-1.32418	2.50916	2.32503	-0.411168	-0.954645
	98	13	-1.52082	2.47312	1.7662	-0.533054	-0.721165
	99	13	-1.37309	2.48777	2.15182	-0.471711	-0.874065
	100	13	-1.28896	2.14962	2.37497	-0.147064	-0.967805
	1	14	-1.37295	2.18155	2.28842	-0.457477	-0.741517
	2	14	-1.38433	2.3016	2.19253	-0.602805	-0.705359
	3	14	-1.35855	2.17418	2.35327	-0.371905	-0.795495
	4	14	-1.39379	2.35475	2.35486	-0.547303	-0.765285
	5	14	-1.38143	2.17523	2.17531	-0.418866	-0.724921
	6	14	-1.35809	2.13141	2.3009	-0.43037	-0.745104
	7	14	-1.35244	2.13506	2.30638	-0.344676	-0.779987
	8	14	-1.32106	2.13326	2.16736	-0.438624	-0.750624
	9	14	-1.3217	2.15802	2.19441	-0.391265	-0.770595
	10	14	-1.35881	2.12736	2.1858	-0.425869	-0.714394
	11	14	-1.17715	2.16671	2.45729	-0.29152	-0.930131
	12	14	-1.30535	2.2196	2.24193	-0.496214	-0.776786
	13	14	-1.26596	2.14175	2.19625	-0.40593	-0.790858
	14	14	-1.39201	2.34625	2.47287	-0.532514	-0.778719
	15	14	-1.3976	2.20845	2.4453	-0.440412	-0.752081
	16	14	-1.39504	2.21354	2.23279	-0.38435	-0.765132
	17	14	-1.33357	2.24362	2.29643	-0.33372	-0.828174
	18	14	-1.29083	2.08848	2.12007	-0.363079	-0.769684
	19	14	-1.2925	2.23151	2.43682	-0.44765	-0.827422
	20	14	-1.3924	2.31015	2.20968	-0.550815	-0.710181
	21	14	-1.28198	2.07166	2.29155	-0.348084	-0.792356
	22	14	-1.28386	2.1597	2.31703	-0.360209	-0.807077
	23	14	-1.3321	2.27518	2.24706	-0.50012	-0.768161
	24	14	-1.30107	2.0827	2.20305	-0.349054	-0.778344
	25	14	-1.43331	2.12891	2.49891	-0.377581	-0.740643
	26	14	-1.39209	2.18387	2.15296	-0.47396	-0.706873
	27	14	-1.31184	2.1984	2.09211	-0.543847	-0.716615
	28	14	-1.33292	2.07961	2.32821	-0.297802	-0.801261
	29	14	-1.56215	2.29324	2.19143	-0.506301	-0.650006
	30	14	-1.3878	2.20874	2.08913	-0.492503	-0.679661
	31	14	-1.3486	2.18849	2.20176	-0.464442	-0.743331
	32	14	-1.36493	2.20234	2.43796	-0.425934	-0.781534
	33	14	-1.28767	2.12832	2.25673	-0.366231	-0.803992
	34	14	-1.40378	2.16151	2.18145	-0.41339	-0.722682
	35	14	-1.28179	2.17436	2.24908	-0.42822	-0.779056
	36	14	-1.36348	2.10725	2.41338	-0.365103	-0.772173
	37	14	-1.32836	2.22809	2.20749	-0.492928	-0.741254
	38	14	-1.3148	2.17618	2.13045	-0.35751	-0.792876
	39	14	-1.35702	2.1511	2.37141	-0.452552	-0.752072
	40	14	-1.42255	2.19324	2.39235	-0.385504	-0.754007
	41	14	-1.36148	2.30495	1.93609	-0.571507	-0.684491
	42	14	-1.20332	2.12197	2.03871	-0.412077	-0.796423
	43	14	-1.25195	2.16196	2.21404	-0.41971	-0.803499
	44	14	-1.5784	2.11139	1.90391	-0.433125	-0.576658
	45	14	-1.16711	2.20473	2.44825	-0.30723	-0.932524
	46	14	-1.47758	2.17061	2.26902	-0.459721	-0.677095
	47	14	-1.20275	2.11387	1.98067	-0.476005	-0.765485
	48	14	-1.34264	2.25878	2.34855	-0.431922	-0.782762
	49	14	-1.47056	2.10022	2.44303	-0.341346	-0.724024
	50	14	-1.18652	2.03428	2.2749	-0.230166	-0.882252
	51	14	-1.17729	2.24833	2.06578	-0.538309	-0.803591
	52	14	-1.17729	2.15048	2.52521	-0.292934	-0.931819
	53	14	-1.32096	2.10987	2.67453	-0.300487	-0.848579
	54	14	-1.39173	2.256	2.25518	-0.497063	-0.741873
	55	14	-1.46688	2.15153	2.48145	-0.296151	-0.762805
	56	14	-1.27531	2.15793	2.13286	-0.498291	-0.751231
	57	14	-1.27483	2.27817	2.24439	-0.522653	-0.792963
	58	14	-1.3238	2.12993	2.30665	-0.418306	-0.754365
	59	14	-1.4912	2.18925	2.07987	-0.412139	-0.672766
	60	14	-1.42419	1.92842	2.30986	-0.1711	-0.748222
	61	14	-1.32296	2.17944	2.24579	-0.419667	-0.781194
	62	14	-1.33912	2.20324	2.26993	-0.484562	-0.759067
	63	14	-1.31452	2.23599	2.34776	-0.487027	-0.780353
	64	14	-1.28322	2.13062	2.22388	-0.449145	-0.77115
	65	14	-1.21695	2.06229	2.00003	-0.424091	-0.750199
	66	14	-1.26024	2.00251	1.9416	-0.335894	-0.727827
	67	14	-1.397	2.16168	2.36405	-0.372067	-0.745846
	68	14	-1.50599	2.16636	2.33296	-0.419774	-0.693503
	69	14	-1.43303	2.12929	1.98641	-0.52476	-0.624037
	70	14	-1.30164	2.13724	2.17657	-0.365683	-0.791241
	71	14	-1.34166	2.12365	2.0738	-0.424024	-0.72955
	72	14	-1.28843	2.22783	2.10056	-0.48248	-0.787864
	73	14	-1.40266	2.05656	2.37175	-0.279881	-0.755534
	74	14	-1.54529	2.22777	2.44377	-0.484241	-0.669537
	75	14	-1.40904	2.25267	2.32434	-0.499606	-0.728975
	76	14	-1.25497	2.15014	2.52095	-0.35603	-0.87007
	77	14	-1.3234	2.22059	2.21966	-0.482104	-0.758772
	78	14	-1.3301	2.31088	2.18671	-0.512609	-0.76093
	79	14	-1.45908	2.27583	2.38089	-0.474793	-0.732231
	80	14	-1.29875	2.21375	2.42327	-0.428136	-0.815765
	81	14	-1.4304	2.09287	2.49498	-0.321349	-0.757881
	82	14	-1.24456	2.09005	2.12288	-0.392793	-0.784343
	83	14	-1.48553	2.30274	2.21009	-0.533163	-0.687651
	84	14	-1.33194	2.26084	2.29785	-0.550052	-0.768711
	85	14	-1.32202	2.29384	2.27348	-0.460677	-0.786963
	86	14	-1.26521	2.24308	2.24733	-0.487647	-0.806818
	87	14	-1.25894	2.09936	2.08115	-0.36321	-0.769887
	88	14	-1.40222	2.15156	2.13544	-0.4846	-0.687817
	89	14	-1.32484	2.23402	2.2503	-0.457682	-0.786734
	90	14	-1.32665	2.13144	2.48876	-0.381904	-0.807896
	91	14	-1.34833	2.13262	2.43567	-0.345845	-0.793449
	92	14	-1.41949	2.09288	2.27582	-0.405871	-0.703696
	93	14	-1.25473	2.24533	2.13987	-0.451782	-0.794767
	94	14	-1.36707	2.22556	2.24086	-0.489118	-0.747838
	95	14	-1.30848	2.06416	2.71742	-0.192597	-0.889728
	96	14	-1.285	2.22705	2.52199	-0.428172	-0.837977
	97	14	-1.30415	2.21197	2.24144	-0.4693	-0.77908
	98	14	-1.39522	2.23644	1.93237	-0.552635	-0.656219
	99	14	-1.38253	2.30972	2.19245	-0.589131	-0.714771
	100	14	-1.25611	1.93964	2.42692	-0.208587	-0.849071
	1	15	-1.2577	2.32626	1.81396	-0.623402	-0.786015
	2	15	-1.30082	2.39897	2.05587	-0.650362	-0.814135
	3	15	-1.28663	2.30096	2.14674	-0.446579	-0.866839
	4	15	-1.3757	2.316	1.88495	-0.569143	-0.738107
	5	15	-1.46508	2.36623	2.06523	-0.578534	-0.729278
	6	15	-1.25158	2.13997	2.12795	-0.376726	-0.856707
	7	15	-1.21665	2.13621	2.02301	-0.373876	-0.855635
	8	15	-1.26182	2.21241	2.20789	-0.414562	-0.874494
	9	15	-1.2272	2.1497	1.88691	-0.348408	-0.865541
	10	15	-1.30496	2.12626	1.97526	-0.335543	-0.814777
	11	15	-1.14571	2.3842	2.28358	-0.462921	-0.991963
	12	15	-1.34628	2.24111	1.61809	-0.616435	-0.679675
	13	15	-1.15562	2.31626	1.97359	-0.51859	-0.89282
	14	15	-1.46212	2.34966	1.99883	-0.615954	-0.703635
	15	15	-1.49445	2.32813	2.32317	-0.412434	-0.794175
	16	15	-1.19928	2.15779	2.02167	-0.321269	-0.901606
	17	15	-1.25901	2.25903	1.87411	-0.445471	-0.83542
	18	15	-1.26038	2.28819	1.99967	-0.504402	-0.85152
	19	15	-1.28892	2.31099	2.11808	-0.450574	-0.856215
	20	15	-1.36424	2.48079	2.17907	-0.614821	-0.821537
	21	15	-1.32857	2.16446	2.079	-0.382371	-0.814854
	22	15	-1.14548	2.18042	2.26474	-0.340865	-0.946137
	23	15	-1.2804	2.30637	2.19697	-0.467463	-0.860672
	24	15	-1.40485	2.17858	1.77588	-0.426689	-0.726484
	25	15	-1.30386	2.18623	2.45605	-0.356553	-0.89156
	26	15	-1.30892	2.27782	1.62675	-0.587587	-0.716472
	27	15	-1.34389	2.1433	1.9605	-0.439063	-0.763705
	28	15	-1.2857	2.33675	2.1689	-0.534799	-0.866971
	29	15	-1.34196	2.3279	2.29636	-0.499875	-0.844891
	30	15	-1.26927	2.29747	1.80243	-0.554664	-0.774401
	31	15	-1.30017	2.14235	2.20927	-0.301483	-0.868326
	32	15	-1.29141	2.23544	2.25509	-0.376063	-0.891431
	33	15	-1.37231	2.32364	2.08078	-0.436756	-0.836848
	34	15	-1.36217	2.4542	1.80771	-0.68597	-0.733748
	35	15	-1.27054	2.29619	2.07292	-0.490615	-0.837331
	36	15	-1.26058	2.07562	2.09674	-0.279932	-0.859595
	37	15	-1.37094	2.22863	2.21284	-0.410046	-0.815343
	38	15	-1.21975	2.19115	1.90334	-0.381822	-0.859909
	39	15	-1.24857	2.1455	2.02935	-0.409299	-0.83994
	40	15	-1.30686	2.05284	2.19609	-0.300737	-0.843432
	41	15	-1.52604	2.35669	1.54812	-0.621972	-0.603931
	42	15	-1.27088	2.14753	2.0951	-0.41901	-0.837261
	43	15	-1.21022	2.19006	1.92999	-0.433027	-0.846296
	44	15	-1.47348	2.24166	1.17259	-0.592963	-0.570646
	45	15	-1.1522	2.2446	2.01033	-0.445477	-0.901249
	46	15	-1.32871	2.33514	1.73936	-0.626573	-0.725061
	47	15	-1.23544	2.21855	1.88184	-0.478663	-0.830045
	48	15	-1.35471	2.24286	2.2896	-0.344146	-0.864304
	49	15	-1.41714	2.1686	2.1383	-0.446396	-0.744437
	50	15	-1.27709	2.18431	2.18844	-0.339742	-0.863307
	51	15	-1.18081	2.29962	1.81983	-0.502478	-0.855045
	52	15	-1.18945	2.38019	2.31309	-0.473196	-0.943825
	53	15	-1.22329	2.07757	2.25442	-0.325456	-0.885142
	54	15	-1.34149	2.22727	2.14528	-0.45802	-0.822527
	55	15	-1.3416	2.14895	2.09621	-0.307557	-0.839808
	56	15	-1.24417	2.34269	1.87979	-0.642326	-0.803388
	57	15	-1.38944	2.42709	2.12594	-0.700104	-0.755326
	58	15	-1.29259	2.10573	1.94993	-0.355134	-0.804781
	59	15	-1.59143	2.35687	1.6433	-0.53873	-0.635874
	60	15	-1.34476	2.01287	2.1491	-0.221694	-0.835761
	61	15	-1.3403	2.21642	2.10931	-0.441891	-0.822086
	62	15	-1.22893	2.29495	2.02729	-0.557207	-0.852486
	63	15	-1.36678	2.29182	2.05283	-0.494143	-0.805058
	64	15	-1.201	2.05114	1.89234	-0.406393	-0.828205
	65	15	-1.12609	2.09353	1.8643	-0.456362	-0.837357
	66	15	-1.15977	2.06733	1.74477	-0.400908	-0.827165
	67	15	-1.34816	2.18016	2.23472	-0.361399	-0.828956
	68	15	-1.28674	2.32537	2.06735	-0.575946	-0.816885
	69	15	-1.37954	2.26862	2.15687	-0.472492	-0.791847
	70	15	-1.26024	2.32183	1.99775	-0.516741	-0.840975
	71	15	-1.19588	2.14936	1.98215	-0.417692	-0.86724
	72	15	-1.31628	2.30959	1.98774	-0.49595	-0.824962
	73	15	-1.29157	2.13773	2.24606	-0.338407	-0.858421
	74	15	-1.42228	2.32093	2.17229	-0.49732	-0.778767
	75	15	-1.33137	2.26977	2.24052	-0.456154	-0.839326
	76	15	-1.29685	2.17673	2.27475	-0.324198	-0.88066
	77	15	-1.30076	2.29667	2.01394	-0.489147	-0.825774
	78	15	-1.27626	2.29535	1.9717	-0.530107	-0.814866
	79	15	-1.38137	2.21173	2.30718	-0.403512	-0.83632
	80	15	-1.25671	2.26719	2.21077	-0.420295	-0.893104
	81	15	-1.34062	2.21505	2.11251	-0.420548	-0.812985
	82	15	-1.11129	2.29466	2.042	-0.475622	-0.936575
	83	15	-1.43078	2.41337	2.19949	-0.602147	-0.77599
	84	15	-1.30211	2.28294	2.17163	-0.498958	-0.855609
	85	15	-1.23314	2.27527	2.14455	-0.503943	-0.866292
	86	15	-1.2075	2.40005	2.07715	-0.594899	-0.868949
	87	15	-1.20709	2.23084	2.07104	-0.400134	-0.884893
	88	15	-1.32159	2.28739	2.05368	-0.527893	-0.810026
	89	15	-1.31055	2.23344	2.10487	-0.414523	-0.840658
	90	15	-1.34923	2.44685	1.95383	-0.665474	-0.763618
	91	15	-1.30312	2.19422	2.03534	-0.372297	-0.823423
	92	15	-1.38266	2.25447	2.0964	-0.470481	-0.781339
	93	15	-1.19523	2.34028	2.11574	-0.40252	-0.937634
	94	15	-1.27949	2.26011	1.96379	-0.4921	-0.804106
	95	15	-1.30994	2.34288	2.12834	-0.479625	-0.846701
	96	15	-1.22938	2.25774	2.18894	-0.505902	-0.868042
	97	15	-1.26129	2.31669	2.32449	-0.452164	-0.902707
	98	15	-1.46917	2.2629	1.47318	-0.560412	-0.629243
	99	15	-1.31878	2.40971	2.07053	-0.511915	-0.847273
	100	15	-1.41201	2.18667	2.45207	-0.332135	-0.852534
	1	16	-1.11913	2.30341	2.52596	-0.407345	-0.907975
	2	16	-1.02757	2.24454	2.37922	-0.391042	-0.930036
	3	16	-1.1721	2.26507	2.677	-0.330378	-0.923672
	4	16	-1.15398	2.3559	2.91044	-0.314107	-0.978077
	5	16	-1.06143	2.27896	2.56108	-0.344324	-0.96423
	6	16	-1.13852	2.13143	2.91309	-0.147037	-0.987559
	7	16	-1.16091	2.25158	2.67166	-0.34802	-0.910913
	8	16	-1.09922	2.26065	2.73413	-0.367164	-0.938924
	9	16	-1.39244	2.29119	2.42469	-0.246698	-0.807048
	10	16	-1.1763	2.06173	2.58645	-0.111943	-0.913933
	11	16	-1.10437	2.33986	2.8328	-0.350681	-0.987223
	12	16	-1.06845	2.1302	2.46601	-0.279624	-0.922394
	13	16	-1.11804	2.19864	2.60402	-0.310979	-0.927286
	14	16	-1.36516	2.32839	2.85543	-0.375122	-0.835833
	15	16	-1.22218	2.17283	2.95992	-0.115983	-0.967754
	16	16	-1.11997	2.2632	2.72289	-0.244834	-0.982068
	17	16	-1.10692	2.3114	2.6505	-0.274858	-0.973619
	18	16	-1.12374	2.22508	2.93953	-0.236034	-1.0159
	19	16	-1.31014	2.31026	2.95571	-0.259257	-0.902656
	20	16	-1.14336	2.30908	2.83095	-0.288165	-0.965429
	21	16	-1.15179	2.11732	2.89709	-0.172475	-0.963612
	22	16	-1.17801	2.20432	2.85853	-0.19849	-0.955972
	23	16	-1.1943	2.27911	2.85494	-0.277408	-0.942361
	24	16	-1.09753	2.17063	2.90179	-0.164221	-1.00867
	25	16	-1.26358	2.20349	3.00634	-0.228549	-0.923585
	26	16	-1.05073	2.22282	2.27976	-0.37576	-0.907092
	27	16	-1.21698	2.12674	2.81372	-0.173531	-0.932346
	28	16	-1.20577	2.31586	3.08522	-0.315042	-0.965945
	29	16	-1.20239	2.39934	2.70738	-0.427034	-0.907876
	30	16	-1.05404	2.18535	2.67762	-0.219606	-0.971753
	31	16	-1.1251	2.2373	2.86739	-0.224586	-0.998713
	32	16	-1.16719	2.28187	2.94136	-0.273417	-0.978306
	33	16	-1.14019	2.2586	2.77557	-0.298861	-0.951218
	34	16	-1.12146	2.30757	2.54315	-0.386035	-0.90693
	35	16	-1.14123	2.27287	2.88871	-0.256732	-0.970405
	36	16	-1.17345	2.17117	2.64968	-0.22087	-0.917451
	37	16	-1.31992	2.30183	2.15701	-0.39627	-0.75741
	38	16	-1.30364	2.21391	2.44363	-0.320049	-0.797581
	39	16	-1.05027	2.18174	2.91125	-0.23718	-1.01629
	40	16	-1.22495	2.11813	2.90326	-0.148091	-0.931225
	41	16	-1.25464	2.28666	2.2116	-0.387222	-0.786994
	42	16	-1	2.06047	2.53814	-0.174456	-0.990461
	43	16	-1.10423	2.27648	2.60517	-0.345367	-0.92978
	44	16	-1.2728	2.16081	2.06747	-0.303324	-0.756671
	45	16	-1.14658	2.2086	2.8041	-0.284758	-0.94183
	46	16	-1.22617	2.24255	2.69141	-0.354195	-0.863379
	47	16	-1.0013	2.16837	2.5195	-0.325956	-0.959241
	48	16	-1.2194	2.26152	3.06729	-0.228694	-0.961033
	49	16	-1.45914	2.19224	2.4593	-0.244772	-0.732408
	50	16	-1.04703	2.1791	2.76391	-0.209663	-1.00689
	51	16	-0.982883	2.27543	2.3185	-0.354804	-0.952635
	52	16	-1.13127	2.32683	2.66897	-0.364337	-0.938316
	53	16	-1.11035	2.11289	2.97792	-0.186015	-0.989999
	54	16	-1.34771	2.26794	2.92871	-0.280697	-0.865379
	55	16	-1.20016	2.25093	3.05749	-0.166387	-0.990992
	56	16	-1.0284	2.25925	2.6627	-0.347608	-0.984904
	57	16	-1.17608	2.23562	2.80986	-0.304943	-0.933708
	58	16	-1.08874	2.14747	2.66054	-0.213443	-0.961785
	59	16	-1.4327	2.2861	2.46466	-0.303281	-0.765939
	60	16	-1.32408	2.02327	2.97979	-0.0120531	-0.914189
	61	16	-1.20768	2.16336	2.8234	-0.184229	-0.944803
	62	16	-1.04192	2.12876	2.74243	-0.260207	-0.977061
	63	16	-1.21587	2.26108	2.83638	-0.281889	-0.92804
	64	16	-1.05623	2.19526	2.74048	-0.291695	-0.987882
	65	16	-1.1378	2.15985	2.54053	-0.274205	-0.896802
	66	16	-1.19629	2.06068	2.32905	-0.209306	-0.82964
	67	16	-1.17414	2.41674	2.66808	-0.479293	-0.903983
	68	16	-1.25169	2.22861	2.87943	-0.265785	-0.911006
	69	16	-1.28238	2.35584	2.42448	-0.490799	-0.782416
	70	16	-1.16987	2.31586	2.6637	-0.340404	-0.921971
	71	16	-1.16934	2.13041	2.56732	-0.238301	-0.904267
	72	16	-1.32783	2.46807	2.2883	-0.463587	-0.792652
	73	16	-1.20958	2.17066	2.92899	-0.170501	-0.956405
	74	16	-1.27322	2.24222	2.9658	-0.225038	-0.915592
	75	16	-1.38204	2.33448	2.50698	-0.342935	-0.796049
	76	16	-1.16688	2.16746	3.01214	-0.154608	-0.991742
	77	16	-1.08321	2.23866	2.61939	-0.316157	-0.948318
	78	16	-1.16157	2.36181	2.74054	-0.34238	-0.945052
	79	16	-1.17585	2.25728	2.92905	-0.288255	-0.962209
	80	16	-1.16349	2.18163	2.75018	-0.166721	-0.955354
	81	16	-1.2553	2.2389	2.63069	-0.285994	-0.858492
	82	16	-1.12377	2.27567	2.65273	-0.293909	-0.945132
	83	16	-1.27001	2.22753	2.73802	-0.264296	-0.887447
	84	16	-1.08628	2.25721	2.83782	-0.302712	-1.00503
	85	16	-1.17904	2.17958	2.79118	-0.217555	-0.947548
	86	16	-1.00192	2.28239	2.42228	-0.406683	-0.942892
	87	16	-1.16296	2.29943	2.82322	-0.276166	-0.957781
	88	16	-1.09286	2.28521	2.70049	-0.364496	-0.950269
	89	16	-1.21234	2.20665	2.57293	-0.248905	-0.908292
	90	16	-1.11152	2.28978	2.93449	-0.31015	-0.997452
	91	16	-1.22136	2.11191	2.91681	-0.14326	-0.929938
	92	16	-1.17165	2.25947	2.7326	-0.312345	-0.91811
	93	16	-1.38653	2.33893	2.66187	-0.245888	-0.848045
	94	16	-1.1492	2.2032	2.67967	-0.249165	-0.937151
	95	16	-1.18132	2.30057	2.85559	-0.306162	-0.939325
	96	16	-1.16632	2.24162	2.88299	-0.291939	-0.932062
	97	16	-1.11505	2.3481	2.99216	-0.296411	-1.00908
	98	16	-1.46707	2.32319	2.11846	-0.375203	-0.69392
	99	16	-1.33071	2.27569	2.90004	-0.286193	-0.884898
	100	16	-1.13019	2.06537	2.61853	-0.243987	-0.921496
	1	17	-1.58009	2.42214	3.27125	-0.246313	-0.91265
	2	17	-1.57284	2.64259	3.22377	-0.60409	-0.850064
	3	17	-1.67006	2.41209	3.3739	-0.195505	-0.905041
	4	17	-1.62896	2.47733	3.42188	-0.318129	-0.882401
	5	17	-1.63058	2.3756	3.2482	-0.233935	-0.871682
	6	17	-1.57877	2.36221	3.34901	-0.281583	-0.897069
	7	17	-1.62736	2.33799	3.77531	-0.0782663	-0.996119
	8	17	-1.64242	2.39703	3.30885	-0.262959	-0.876734
	9	17	-1.62093	2.30138	3.51824	-0.0828883	-0.956849
	10	17	-1.67387	2.3151	3.19582	-0.202456	-0.834064
	11	17	-1.3882	2.53495	3.24615	-0.359828	-1.0106
	12	17	-1.46589	2.28894	2.89761	-0.265248	-0.876586
	13	17	-1.58205	2.33611	3.4213	-0.154506	-0.941568
	14	17	-1.70754	2.51727	3.40034	-0.428656	-0.821744
	15	17	-1.69701	2.37005	3.4509	-0.214106	-0.86984
	16	17	-1.57205	2.46837	3.34803	-0.266123	-0.932383
	17	17	-1.51914	2.5227	3.38035	-0.245013	-0.99389
	18	17	-1.54607	2.28958	3.25184	-0.150745	-0.917474
	19	17	-1.49889	2.40599	3.44686	-0.250046	-0.965867
	20	17	-1.68586	2.53684	3.06841	-0.407873	-0.804339
	21	17	-1.59363	2.17119	3.32355	-0.131549	-0.880816
	22	17	-1.55924	2.36277	3.36973	-0.209473	-0.917215
	23	17	-1.6663	2.44765	3.13675	-0.346922	-0.815974
	24	17	-1.65443	2.29424	3.09648	-0.246074	-0.80246
	25	17	-1.58967	2.37794	3.58324	-0.199502	-0.949463
	26	17	-1.67624	2.34749	2.81241	-0.355068	-0.739998
	27	17	-1.8076	2.46112	3.35148	-0.350302	-0.770921
	28	17	-1.55753	2.30981	3.15064	-0.215578	-0.89344
	29	17	-1.74416	2.48038	3.13924	-0.384537	-0.779469
	30	17	-1.66951	2.51641	3.46411	-0.328967	-0.878124
	31	17	-1.65514	2.4241	3.1602	-0.335882	-0.83447
	32	17	-1.5915	2.36473	3.29015	-0.287393	-0.873893
	33	17	-1.55517	2.29604	3.32875	-0.134425	-0.94989
	34	17	-1.64849	2.40236	2.94406	-0.327945	-0.796039
	35	17	-1.49935	2.39639	3.33017	-0.295966	-0.928531
	36	17	-1.6452	2.34211	3.41806	-0.169319	-0.899332
	37	17	-1.56048	2.53672	3.24636	-0.444332	-0.872727
	38	17	-1.55633	2.3134	3.12985	-0.251908	-0.869544
	39	17	-1.59376	2.26262	3.52494	-0.138338	-0.929531
	40	17	-1.73838	2.32173	3.27835	-0.238353	-0.794913
	41	17	-1.5847	2.53066	3.18594	-0.396852	-0.864454
	42	17	-1.50248	2.44997	3.24057	-0.253204	-0.963448
	43	17	-1.51334	2.38213	3.27256	-0.254163	-0.9368
	44	17	-1.76435	2.29768	3.09864	-0.215168	-0.777662
	45	17	-1.50541	2.55106	3.0267	-0.33102	-0.952464
	46	17	-1.57744	2.29483	3.00401	-0.310436	-0.813471
	47	17	-1.53298	2.30097	3.30206	-0.220383	-0.917455
	48	17	-1.53259	2.36729	3.32207	-0.174382	-0.959407
	49	17	-1.8324	2.25136	3.07496	-0.245624	-0.690341
	50	17	-1.45205	2.33922	3.28012	-0.180897	-0.982315
	51	17	-1.53955	2.47746	3.17875	-0.394091	-0.877472
	52	17	-1.52779	2.3337	3.68823	-0.093213	-1.03891
	53	17	-1.51449	2.3101	3.45699	-0.152776	-0.972286
	54	17	-1.58602	2.46416	3.38805	-0.32357	-0.919768
	55	17	-1.70879	2.32303	3.33199	-0.162345	-0.846866
	56	17	-1.50348	2.39268	3.01097	-0.339456	-0.882849
	57	17	-1.56125	2.42718	3.08348	-0.344341	-0.873142
	58	17	-1.73557	2.42581	3.29145	-0.283041	-0.812692
	59	17	-1.68611	2.27462	3.11245	-0.111747	-0.852963
	60	17	-1.62846	2.28562	3.32291	-0.106264	-0.904426
	61	17	-1.52891	2.30648	3.08934	-0.186896	-0.906674
	62	17	-1.5471	2.37359	3.48625	-0.239169	-0.943771
	63	17	-1.56961	2.47345	3.43738	-0.334961	-0.926029
	64	17	-1.5195	2.43341	3.25333	-0.369316	-0.905119
	65	17	-1.53722	2.27244	3.12794	-0.160008	-0.902218
	66	17	-1.43985	2.35168	3.13487	-0.190106	-0.962462
	67	17	-1.51121	2.43122	3.31245	-0.2439	-0.956731
	68	17	-1.70174	2.39016	3.09995	-0.350176	-0.781491
	69	17	-1.67693	2.25943	2.78107	-0.366553	-0.710214
	70	17	-1.60596	2.36529	3.00783	-0.236402	-0.845899
	71	17	-1.57578	2.29617	3.14269	-0.201766	-0.878696
	72	17	-1.61238	2.54356	3.09464	-0.424689	-0.863112
	73	17	-1.61469	2.25405	3.37334	-0.070111	-0.922925
	74	17	-1.62831	2.52836	3.36052	-0.419792	-0.870745
	75	17	-1.65659	2.44187	3.30722	-0.331001	-0.844281
	76	17	-1.4899	2.34646	3.53683	-0.177346	-0.988752
	77	17	-1.61015	2.54524	3.3094	-0.447401	-0.857286
	78	17	-1.55109	2.52354	3.33462	-0.305666	-0.947287
	79	17	-1.68544	2.49634	3.03366	-0.38324	-0.808606
	80	17	-1.49165	2.49293	3.34834	-0.402389	-0.933013
	81	17	-1.68978	2.21502	3.37674	-0.0841396	-0.86229
	82	17	-1.60493	2.50328	3.31541	-0.341694	-0.896472
	83	17	-1.59665	2.51863	3.02219	-0.427818	-0.837517
	84	17	-1.76327	2.47125	3.10455	-0.383097	-0.783663
	85	17	-1.51389	2.46404	3.29759	-0.296644	-0.949049
	86	17	-1.50061	2.49297	3.32782	-0.353782	-0.926719
	87	17	-1.54365	2.43076	2.90646	-0.338002	-0.855328
	88	17	-1.67603	2.43905	3.09501	-0.423832	-0.773651
	89	17	-1.54808	2.37557	3.2891	-0.177145	-0.9612
	90	17	-1.44254	2.33858	3.42978	-0.253559	-0.982758
	91	17	-1.58578	2.32419	3.37319	-0.180798	-0.910936
	92	17	-1.72112	2.38651	3.35224	-0.288137	-0.813985
	93	17	-1.47089	2.33293	3.26235	-0.179849	-0.964823
	94	17	-1.63809	2.46654	3.18016	-0.424149	-0.824357
	95	17	-1.48565	2.37878	3.27115	-0.244061	-0.952415
	96	17	-1.50719	2.36883	3.54524	-0.205314	-0.986652
	97	17	-1.56767	2.52258	3.36011	-0.360307	-0.918233
	98	17	-1.5581	2.45988	2.89341	-0.429258	-0.827255
	99	17	-1.5792	2.36687	3.19545	-0.290465	-0.879404
	100	17	-1.44148	2.21914	3.26551	-0.152562	-0.969191
	1	18	-1.08902	2.4445	2.25661	-0.655361	-0.884162
	2	18	-1.16073	2.52245	2.21414	-0.788058	-0.830979
	3	18	-1.30283	2.3226	2.58433	-0.486029	-0.841892
	4	18	-1.31788	2.34055	2.41544	-0.519659	-0.792476
	5	18	-1.28331	2.4144	2.55961	-0.574075	-0.854508
	6	18	-1.14172	2.19607	2.45819	-0.425151	-0.889385
	7	18	-1.24535	2.32098	2.63655	-0.438699	-0.897451
	8	18	-1.23679	2.32907	2.51789	-0.476392	-0.872835
	9	18	-1.19049	2.37738	2.3546	-0.538953	-0.865957
	10	18	-1.19119	2.25895	2.36387	-0.44866	-0.862254
	11	18	-1.18083	2.52355	2.53526	-0.607679	-0.932342
	12	18	-1.13553	2.30756	2.21611	-0.554103	-0.85498
	13	18	-1.15803	2.34088	2.49518	-0.494334	-0.908008
	14	18	-1.28915	2.44669	2.52776	-0.622625	-0.826559
	15	18	-1.33772	2.30552	2.65316	-0.407118	-0.857183
	16	18	-1.16192	2.36167	2.41861	-0.444416	-0.921365
	17	18	-1.14148	2.41611	2.29119	-0.52589	-0.912194
	18	18	-1.19429	2.39934	2.57621	-0.507054	-0.910023
	19	18	-1.21781	2.46048	2.55071	-0.58886	-0.882946
	20	18	-1.21917	2.52049	2.50467	-0.650048	-0.868152
	21	18	-1.15278	2.13222	2.51537	-0.375285	-0.899331
	22	18	-1.13853	2.27792	2.47698	-0.460917	-0.908762
	23	18	-1.2402	2.38716	2.73077	-0.488934	-0.906717
	24	18	-1.31052	2.31623	2.162	-0.548143	-0.752597
	25	18	-1.29557	2.42131	2.73902	-0.540355	-0.868109
	26	18	-1.17839	2.39563	2.06176	-0.605538	-0.82077
	27	18	-1.22374	2.36499	2.37561	-0.579163	-0.835929
	28	18	-1.22994	2.36977	2.60502	-0.488591	-0.895189
	29	18	-1.38947	2.39485	2.50244	-0.493904	-0.813958
	30	18	-1.19595	2.32948	2.3651	-0.538963	-0.834449
	31	18	-1.23602	2.46058	2.4297	-0.608959	-0.84815
	32	18	-1.20978	2.49418	2.55797	-0.586829	-0.911616
	33	18	-1.15718	2.25517	2.54661	-0.424218	-0.920272
	34	18	-1.33476	2.50482	2.15865	-0.687584	-0.743062
	35	18	-1.14924	2.51462	2.51861	-0.675691	-0.892783
	36	18	-1.20066	2.36143	2.349	-0.499054	-0.863247
	37	18	-1.1601	2.44002	2.58535	-0.617521	-0.906337
	38	18	-1.39176	2.42094	2.4318	-0.552276	-0.777881
	39	18	-1.09186	2.19886	2.56316	-0.342587	-0.965918
	40	18	-1.32569	2.30257	2.49787	-0.513079	-0.798256
	41	18	-1.27511	2.36682	2.34226	-0.53424	-0.800646
	42	18	-1.13512	2.2423	2.34665	-0.428911	-0.891062
	43	18	-1.11649	2.2948	2.43346	-0.466474	-0.912469
	44	18	-1.33454	2.33619	2.00313	-0.575034	-0.724732
	45	18	-1.23895	2.5253	2.38169	-0.670845	-0.852187
	46	18	-1.23488	2.40367	2.22964	-0.63636	-0.790335
	47	18	-1.07722	2.33095	2.40148	-0.522862	-0.908829
	48	18	-1.24525	2.26308	2.63744	-0.427331	-0.881204
	49	18	-1.23403	2.21331	2.62622	-0.391224	-0.868037
	50	18	-1.15774	2.18348	2.57312	-0.297852	-0.941672
	51	18	-1.14754	2.43069	2.1212	-0.583387	-0.850279
	52	18	-1.17172	2.42335	2.73986	-0.498	-0.957254
	53	18	-1.17953	2.26847	2.5546	-0.440372	-0.899454
	54	18	-1.32881	2.42567	2.43355	-0.56566	-0.807887
	55	18	-1.30681	2.23518	2.65978	-0.322331	-0.878497
	56	18	-1.14035	2.44158	2.22282	-0.692241	-0.851822
	57	18	-1.29579	2.43422	2.49601	-0.582325	-0.832741
	58	18	-1.16091	2.28985	2.36523	-0.491865	-0.874146
	59	18	-1.40689	2.28924	2.45624	-0.367522	-0.810065
	60	18	-1.32221	2.20166	2.37339	-0.341652	-0.820024
	61	18	-1.22867	2.31307	2.37188	-0.51276	-0.837505
	62	18	-1.20424	2.27188	2.57356	-0.449206	-0.878105
	63	18	-1.27418	2.41866	2.5683	-0.544835	-0.865742
	64	18	-1.10766	2.36596	2.34896	-0.589704	-0.89557
	65	18	-1.18847	2.30517	2.26747	-0.555289	-0.831952
	66	18	-1.22321	2.23	2.25049	-0.439567	-0.831856
	67	18	-1.21524	2.43565	2.46184	-0.636165	-0.852767
	68	18	-1.23417	2.38255	2.615	-0.504315	-0.893141
	69	18	-1.25497	2.41419	2.27314	-0.65065	-0.791725
	70	18	-1.25366	2.32546	2.50215	-0.441331	-0.863466
	71	18	-1.20326	2.38386	2.21602	-0.598389	-0.827469
	72	18	-1.21383	2.46873	2.55222	-0.556913	-0.903441
	73	18	-1.16322	2.23317	2.55866	-0.352107	-0.922188
	74	18	-1.29064	2.48395	2.4331	-0.64961	-0.809095
	75	18	-1.17944	2.42437	2.56989	-0.548878	-0.906771
	76	18	-1.13626	2.27954	2.52801	-0.401601	-0.925332
	77	18	-1.234	2.44247	2.32143	-0.625577	-0.824319
	78	18	-1.2275	2.39595	2.48927	-0.546089	-0.875463
	79	18	-1.22752	2.2575	2.46891	-0.412049	-0.874729
	80	18	-1.26815	2.32895	2.43496	-0.49429	-0.840992
	81	18	-1.29789	2.35732	2.37805	-0.51474	-0.812206
	82	18	-1.20014	2.5021	2.58912	-0.563981	-0.917538
	83	18	-1.36911	2.43058	2.37733	-0.521561	-0.795362
	84	18	-1.15182	2.44665	2.58627	-0.537559	-0.96577
	85	18	-1.1619	2.37072	2.58761	-0.549822	-0.920357
	86	18	-1.17268	2.47253	2.46302	-0.612455	-0.888454
	87	18	-1.0625	2.37541	2.42451	-0.494512	-0.935227
	88	18	-1.21036	2.39553	2.52682	-0.573031	-0.876072
	89	18	-1.23588	2.29532	2.41107	-0.430155	-0.869317
	90	18	-1.26383	2.46506	2.40501	-0.613954	-0.836849
	91	18	-1.22907	2.30311	2.39491	-0.485804	-0.855851
	92	18	-1.28859	2.4422	2.53594	-0.601974	-0.826802
	93	18	-1.16925	2.34066	2.50013	-0.459887	-0.90485
	94	18	-1.23107	2.34117	2.38716	-0.542161	-0.833391
	95	18	-1.06541	2.50883	2.37443	-0.640157	-0.929026
	96	18	-1.20477	2.33866	2.59494	-0.501536	-0.881539
	97	18	-1.1463	2.42004	2.65654	-0.497608	-0.942765
	98	18	-1.17195	2.47818	2.22068	-0.665022	-0.852545
	99	18	-1.29887	2.4376	2.47221	-0.598551	-0.824862
	100	18	-1.25917	2.2593	2.61651	-0.420537	-0.876088
	1	19	-1.47787	2.28039	2.55403	-0.122105	-0.933167
	2	19	-1.49549	2.30049	2.4477	-0.191348	-0.888545
	3	19	-1.48113	2.16641	2.54137	0.00616301	-0.95023
	4	19	-1.50276	2.30867	2.83792	-0.0831562	-0.971256
	5	19	-1.5201	2.18999	2.18188	-0.191785	-0.785217
	6	19	-1.49289	2.18734	2.98806	0.0625036	-1.01458
	7	19	-1.39464	2.27449	2.48651	-0.185293	-0.934346
	8	19	-1.43501	2.28644	2.74589	-0.136679	-0.956925
	9	19	-1.42327	2.18014	2.57207	-0.0505414	-0.959098
	10	19	-1.51049	2.19915	2.5098	-0.0653456	-0.884655
	11	19	-1.32753	2.31837	2.82697	-0.0527376	-1.06927
	12	19	-1.45964	2.22798	2.33895	-0.173991	-0.854171
	13	19	-1.26444	2.22516	2.72085	-0.0416398	-1.0718
	14	19	-1.46682	2.26714	2.47461	-0.191876	-0.873513
	15	19	-1.52392	2.27261	2.83635	-0.0948544	-0.933532
	16	19	-1.44805	2.18156	2.43773	-0.0174646	-0.939414
	17	19	-1.3952	2.41151	2.25335	-0.230731	-0.918692
	18	19	-1.35932	2.32608	2.66856	-0.142682	-1.00279
	19	19	-1.45107	2.24902	2.75003	-0.0542289	-0.974373
	20	19	-1.49199	2.2998	2.53801	-0.119648	-0.917494
	21	19	-1.44425	2.13953	2.51634	-0.0851907	-0.909828
	22	19	-1.39909	2.34799	2.55781	-0.166779	-0.948583
	23	19	-1.48043	2.16449	2.4366	-0.0556665	-0.897251
	24	19	-1.53716	2.10548	2.19588	-0.0712721	-0.807114
	25	19	-1.4288	2.16146	2.72658	-0.0031846	-0.976441
	26	19	-1.47484	2.23002	2.20155	-0.1918	-0.827913
	27	19	-1.50305	2.12828	2.41793	-0.0626606	-0.866594
	28	19	-1.39589	2.25624	2.50402	-0.112402	-0.95975
	29	19	-1.6057	2.25362	2.68755	-0.0899206	-0.868345
	30	19	-1.43392	2.31986	2.56332	-0.17655	-0.916944
	31	19	-1.47066	2.20577	2.48404	-0.0894553	-0.902819
	32	19	-1.52897	2.28395	2.69744	-0.0745181	-0.928378
	33	19	-1.48239	2.27602	2.52964	-0.154443	-0.896689
	34	19	-1.63712	2.29272	2.0656	-0.249162	-0.726437
	35	19	-1.35557	2.14879	2.52509	-0.0295885	-0.976448
	36	19	-1.46346	2.27234	2.41872	-0.126157	-0.909392
	37	19	-1.4985	2.23744	2.60921	-0.0949314	-0.912454
	38	19	-1.38229	2.29598	2.38062	-0.0916538	-0.984433
	39	19	-1.47705	2.07792	2.82752	0.0344917	-0.954039
	40	19	-1.51011	2.10336	2.59096	-0.0113976	-0.891998
	41	19	-1.49902	2.34699	2.17833	-0.240302	-0.822367
	42	19	-1.45816	2.18643	2.65941	-0.0451593	-0.949437
	43	19	-1.35257	2.14885	2.6487	0.00967221	-1.01613
	44	19	-1.56694	2.15999	1.96164	-0.167337	-0.741737
	45	19	-1.34275	2.37449	2.46513	-0.115312	-1.03164
	46	19	-1.41721	2.19856	2.43128	-0.164028	-0.899843
	47	19	-1.32063	2.03193	2.36673	0.0371401	-0.970511
	48	19	-1.3822	2.3237	2.59191	-0.1475	-0.971182
	49	19	-1.60036	2.18512	2.85017	-0.0148661	-0.895844
	50	19	-1.28931	2.16974	2.56347	-0.0266036	-1.02449
	51	19	-1.35001	2.28321	2.48757	-0.0829531	-0.995485
	52	19	-1.31395	2.27068	2.88159	-0.000778271	-1.09357
	53	19	-1.34928	2.08593	2.53262	-0.0595034	-0.952529
	54	19	-1.47411	2.25529	2.57848	-0.0955744	-0.924954
	55	19	-1.44181	2.21901	2.50813	-0.0356418	-0.945606
	56	19	-1.37148	2.17981	2.32862	-0.146323	-0.909985
	57	19	-1.66992	2.33618	2.53328	-0.227345	-0.783569
	58	19	-1.43189	2.08724	2.61202	0.00623941	-0.936105
	59	19	-1.59974	2.19706	2.23561	-0.0446847	-0.820136
	60	19	-1.52498	2.10865	2.56351	0.0438194	-0.905523
	61	19	-1.50879	2.19588	2.75489	-0.0202582	-0.955048
	62	19	-1.38906	2.23081	2.60744	-0.154896	-0.940938
	63	19	-1.47754	2.24989	2.78357	-0.0106319	-0.985721
	64	19	-1.32836	2.12281	2.35246	-0.107717	-0.93986
	65	19	-1.38896	2.18455	2.29357	-0.147516	-0.891636
	66	19	-1.39581	2.16843	2.40424	-0.0592889	-0.9295
	67	19	-1.46264	2.35349	2.33505	-0.256737	-0.865122
	68	19	-1.44721	2.26741	2.34463	-0.212888	-0.867431
	69	19	-1.52422	2.26074	2.41336	-0.215726	-0.827182
	70	19	-1.48425	2.29166	2.61582	-0.084514	-0.934013
	71	19	-1.43791	2.18561	2.44083	-0.0839629	-0.912917
	72	19	-1.38867	2.21594	2.52413	-0.0968451	-0.974565
	73	19	-1.54205	2.21045	2.70075	-0.0182972	-0.916746
	74	19	-1.54067	2.18499	2.54627	-0.0516687	-0.890429
	75	19	-1.53316	2.28949	2.61823	-0.148331	-0.889614
	76	19	-1.38743	2.19986	2.90025	0.0353134	-1.05609
	77	19	-1.50598	2.24422	2.69803	-0.0898533	-0.926838
	78	19	-1.42384	2.276	2.48242	-0.119277	-0.930612
	79	19	-1.48935	2.20131	2.52611	-0.05388	-0.938347
	80	19	-1.35735	2.16833	2.52595	-0.0105454	-0.997582
	81	19	-1.51325	2.23941	2.82813	-0.0776279	-0.940733
	82	19	-1.3073	2.27109	2.40467	-0.142523	-0.978544
	83	19	-1.56438	2.40425	2.54517	-0.266036	-0.850675
	84	19	-1.555	2.2526	2.45037	-0.198417	-0.839599
	85	19	-1.4228	2.25372	2.55004	-0.125678	-0.932034
	86	19	-1.511	2.27477	2.90444	-0.109052	-0.932762
	87	19	-1.37988	2.22393	2.37706	-0.0690605	-0.945976
	88	19	-1.42061	2.24805	2.54465	-0.194457	-0.921815
	89	19	-1.47875	2.2054	2.48632	-0.0784498	-0.911326
	90	19	-1.47647	2.22759	2.30676	-0.203382	-0.840002
	91	19	-1.4204	2.12893	2.74834	0.0855544	-1.01073
	92	19	-1.49925	2.18105	2.47875	-0.0945144	-0.878586
	93	19	-1.37371	2.27125	2.8075	0.0271467	-1.05834
	94	19	-1.43785	2.23875	2.46724	-0.110475	-0.917392
	95	19	-1.50217	2.28151	2.77251	-0.0873367	-0.938003
	96	19	-1.47115	2.28985	2.65473	-0.165532	-0.919553
	97	19	-1.43436	2.2883	2.66991	-0.11308	-0.964788
	98	19	-1.49156	2.15315	2.04302	-0.0983283	-0.826014
	99	19	-1.49023	2.22951	2.70088	-0.0158365	-0.970062
	100	19	-1.35135	2.12765	2.51488	-0.13108	-0.933378
	1	20	-1.25308	2.57052	3.12784	-0.461296	-1.00758
	2	20	-1.47066	2.6818	3.24937	-0.571486	-0.906234
	3	20	-1.37366	2.74863	3.44724	-0.475476	-1.04646
	4	20	-1.39359	2.75259	3.31407	-0.538725	-0.979107
	5	20	-1.42034	2.64189	3.52096	-0.436146	-0.996546
	6	20	-1.39725	2.44639	3.59104	-0.247468	-1.04074
	7	20	-1.39914	2.59037	3.35908	-0.383983	-0.98263
	8	20	-1.48845	2.68559	3.77417	-0.444778	-1.00591
	9	20	-1.45133	2.65027	3.16236	-0.397055	-0.958107
	10	20	-1.32972	2.4628	3.35324	-0.271199	-1.01414
	11	20	-1.38511	2.68404	3.75885	-0.350194	-1.1035
	12	20	-1.23871	2.58667	3.02531	-0.532254	-0.988066
	13	20	-1.23622	2.5864	3.33804	-0.484534	-1.02971
	14	20	-1.54352	2.68083	3.62456	-0.479248	-0.948236
	15	20	-1.43805	2.68034	3.75192	-0.396983	-1.04633
	16	20	-1.27214	2.66057	3.40391	-0.398315	-1.07891
	17	20	-1.28727	2.68776	3.33059	-0.419207	-1.05625
	18	20	-1.42787	2.65069	3.60115	-0.356306	-1.04377
	19	20	-1.41312	2.71263	3.69679	-0.444505	-1.03753
	20	20	-1.31264	2.65622	3.36982	-0.424816	-1.03447
	21	20	-1.39924	2.50553	3.29595	-0.365214	-0.965769
	22	20	-1.45477	2.79671	3.51008	-0.530338	-0.983076
	23	20	-1.38239	2.61097	3.46044	-0.420781	-1.00681
	24	20	-1.2019	2.33763	3.23745	-0.229773	-1.06465
	25	20	-1.32762	2.52506	3.42611	-0.351592	-1.02334
	26	20	-1.3524	2.58479	2.81339	-0.535104	-0.888732
	27	20	-1.3773	2.47027	3.36751	-0.384193	-0.965845
	28	20	-1.44886	2.70384	3.64112	-0.413124	-1.03766
	29	20	-1.47755	2.71257	3.43443	-0.485667	-0.970629
	30	20	-1.34414	2.58045	3.37886	-0.382319	-1.00404
	31	20	-1.3648	2.64531	3.39864	-0.423029	-1.0268
	32	20	-1.26361	2.50248	3.51814	-0.30499	-1.09956
	33	20	-1.30547	2.7536	3.25839	-0.572779	-1.01719
	34	20	-1.33209	2.6432	3.25918	-0.453547	-0.995623
	35	20	-1.23786	2.60774	3.27466	-0.462399	-1.03853
	36	20	-1.35453	2.61679	3.44317	-0.44761	-1.00328
	37	20	-1.44756	2.65662	3.46843	-0.402054	-0.98816
	38	20	-1.39537	2.58595	3.31152	-0.357183	-0.986616
	39	20	-1.32083	2.68149	3.52862	-0.480834	-1.04915
	40	20	-1.43046	2.48295	3.65162	-0.282212	-1.01092
	41	20	-1.31318	2.60234	3.09566	-0.446051	-0.980246
	42	20	-1.29428	2.50178	3.54773	-0.276313	-1.07507
	43	20	-1.23881	2.66147	3.31401	-0.47045	-1.05357
	44	20	-1.57312	2.47238	2.84057	-0.415967	-0.791569
	45	20	-1.39909	2.60715	3.46947	-0.385307	-1.02633
	46	20	-1.45371	2.61988	3.20618	-0.449594	-0.929697
	47	20	-1.20675	2.51074	2.96613	-0.447711	-0.998086
	48	20	-1.38702	2.678	3.64647	-0.427933	-1.04651
	49	20	-1.42389	2.51127	3.42238	-0.345307	-0.976655
	50	20	-1.26167	2.54428	3.67701	-0.265834	-1.12772
	51	20	-1.33478	2.5922	3.07267	-0.500881	-0.955239
	52	20	-1.296	2.74403	3.89477	-0.422359	-1.14741
	53	20	-1.21014	2.49335	3.56548	-0.290609	-1.12231
	54	20	-1.49945	2.61129	3.35702	-0.442868	-0.921669
	55	20	-1.42067	2.58426	3.53141	-0.29034	-1.04253
	56	20	-1.27833	2.60741	3.30798	-0.501989	-1.02078
	57	20	-1.36511	2.77631	3.67092	-0.550614	-1.04899
	58	20	-1.36236	2.46737	3.44755	-0.276887	-1.02386
	59	20	-1.50413	2.55991	3.20802	-0.353327	-0.920876
	60	20	-1.34955	2.46411	3.41881	-0.291781	-1.01745
	61	20	-1.40909	2.62249	3.47164	-0.355806	-1.02363
	62	20	-1.31906	2.67541	3.5194	-0.500445	-1.04897
	63	20	-1.40102	2.50902	3.49341	-0.336834	-1.01596
	64	20	-1.26118	2.49708	3.30675	-0.397382	-1.02893
	65	20	-1.22661	2.5772	3.22203	-0.444295	-1.04903
	66	20	-1.2691	2.40921	3.36467	-0.223913	-1.06992
	67	20	-1.40015	2.69354	3.32776	-0.498647	-0.980418
	68	20	-1.41214	2.58062	3.56875	-0.375644	-1.01718
	69	20	-1.46136	2.75987	3.37882	-0.615247	-0.937646
	70	20	-1.33309	2.64304	3.47933	-0.415115	-1.052
	71	20	-1.31476	2.61329	3.31896	-0.480924	-1.01242
	72	20	-1.32962	2.6514	3.17144	-0.402395	-1.02491
	73	20	-1.43009	2.64509	3.54595	-0.372845	-1.01509
	74	20	-1.42491	2.55442	3.693	-0.311424	-1.0312
	75	20	-1.43399	2.69199	3.30373	-0.448159	-0.971581
	76	20	-1.25991	2.61556	3.67077	-0.343333	-1.12824
	77	20	-1.32075	2.57977	3.47392	-0.379641	-1.04141
	78	20	-1.36296	2.63018	3.34877	-0.470488	-0.990155
	79	20	-1.46619	2.61729	3.55154	-0.379317	-1.00573
	80	20	-1.30082	2.54947	3.56627	-0.296084	-1.08326
	81	20	-1.46986	2.63626	3.56351	-0.402276	-0.978725
	82	20	-1.32387	2.65773	3.41079	-0.413681	-1.03396
	83	20	-1.39973	2.80537	3.44351	-0.518855	-1.0246
	84	20	-1.38097	2.64613	3.28463	-0.499945	-0.982485
	85	20	-1.27372	2.70284	3.39756	-0.518594	-1.06943
	86	20	-1.31085	2.72433	3.54784	-0.500248	-1.04432
	87	20	-1.31913	2.56409	3.60272	-0.296864	-1.07924
	88	20	-1.32164	2.58677	3.28174	-0.433937	-1.00411
	89	20	-1.4263	2.6703	3.50073	-0.398174	-1.02993
[truncated: 48,011 more rows]
