# Supplementary material for: Accept–reject decision-making revealed via a quantitative and ethological study of C. elegans foraging
Source: eLife. 2025 Sep 10;13:RP103191. doi: 10.7554/eLife.103191 (PMC12422737; doi:10.7554/eLife.103191)
Supplement: Figure 4—source data 2. [file elife-103191-fig4-data2.xlsx]

## Sheet: Sheet1
Figure 4 - Source Data 2
Figure 4D - Probability of exploitation occuring for the first time as a function of the number of encounters
Coefficient values for nested GLMs
	coefficient	β_0	+ β_k ρ_k	+ β_s τ_s	+ β_h ρ_h	+ β_e ρ_e		* coefficient values fit by logistic regression across 50,000 replicates as described in methods and Figure 4 - supplement 1
	β_0	-1.24062	-1.96943	-2.28714	-2.03014	-1.30556
	β_k		1.35566	1.521	2.25603	2.32683
	β_s			1.03425	0.640264	2.44675
	β_h				-0.833279	-0.395407
	β_e					-0.859494
Probability distributions
	label	encounter #	β_0	+ β_k ρ_k	+ β_s τ_s	+ β_h ρ_h	+ β_e ρ_e	observed		* probability of exploitation occuring for the first time as a function of the number of encounters
	1	1	0.217893	0.122987	0.107314	0.0211145	0.0245973	0.0655202		* exploitation events were simulated for 100 replicates using the p(exploit) as described in methods, Figure 2H, and Figure 2 - supplement 6
	1	2	0.167392	0.104266	0.0920766	0.124728	0.0639965	0.0864171
	1	3	0.120157	0.0955594	0.0885938	0.118633	0.075098	0.0840226
	1	4	0.100566	0.085764	0.075751	0.0959948	0.0872878	0.0457118
	1	5	0.0737919	0.0650849	0.0737919	0.0787984	0.0846757	0.105355
	1	6	0.0552895	0.0528951	0.0598607	0.0666086	0.0742273	0.109055
	1	7	0.0374401	0.0404876	0.0439704	0.0433174	0.0642142	0.0694384
	1	8	0.0259034	0.0365694	0.0389639	0.0424467	0.0542011	0.0409229
	1	9	0.0198084	0.0293862	0.0252503	0.0293862	0.0476709	0.0343927
	1	10	0.0145842	0.018067	0.0195908	0.0256857	0.0322159	0.0524597
	1	11	0.00827166	0.0148019	0.0195908	0.0154549	0.0276448	0.0574663
	1	12	0.0043535	0.00957771	0.0111014	0.0139312	0.0208968	0.0274271
	1	13	0.00239443	0.00565956	0.00522421	0.00979539	0.0124075	0.00805398
	1	14	0.000870701	0.00500653	0.00544188	0.00282978	0.00979539	0.00391815
	1	15	0.00043535	0.00282978	0.00565956	0.0026121	0.00696561	0.00609491
	1	16	0.00043535	0.00152373	0.00239443	0.00195908	0.00522421	0.00870701
	1	17	0.000653026	0.0017414	0.00152373	0.00239443	0.00565956	0.00609491
	1	18	0	0.000653026	0.00108838	0.000870701	0.00304745	0.00544188
	1	19	0	0.000653026	0.000217675	0.000217675	0.00152373	0.00696561
	1	20	0	0	0.000217675	0.000217675	0.000653026	0.00892468
	1	21	0	0	0	0	0.000217675	0.0043535
	1	22	0	0.000217675	0	0	0.000217675	0.000870701
	1	23	0	0	0	0	0	0.000217675
	1	24	0	0	0	0	0	0
	1	25	0	0	0	0	0	0
	1	26	0	0	0	0	0	0
	1	27	0	0	0	0	0	0
	10	1	0.215	0.35	0.3258	0.162	0.1536	0.1056
	10	2	0.1752	0.2264	0.22	0.2956	0.221	0.1588
	10	3	0.1216	0.1384	0.1436	0.1866	0.184	0.1798
	10	4	0.0962	0.0836	0.0918	0.1108	0.1268	0.1498
	10	5	0.0588	0.0478	0.052	0.0612	0.0828	0.0736
	10	6	0.0406	0.0238	0.0244	0.0354	0.0506	0.0924
	10	7	0.019	0.0144	0.0148	0.0138	0.0274	0.1238
	10	8	0.0126	0.0044	0.0072	0.0068	0.0162	0.075
	10	9	0.007	0.0012	0.003	0.0036	0.0052	0.0068
	10	10	0.0028	0.001	0.0018	0.0006	0.0022	0.006
	10	11	0.0016	0.0006	0.0002	0.001	0.0006	0.0026
	10	12	0	0	0.0002	0	0.0006	0.0002
	10	13	0.0006	0	0	0	0	0.0028
	10	14	0.0004	0	0	0	0	0.0068
	10	15	0.0002	0	0.0002	0	0.0002	0.0032
	10	16	0.0002	0	0	0	0	0
	10	17	0.0002	0	0	0	0	0
	10	18	0	0	0	0	0	0
	10	19	0	0	0	0	0	0
	10	20	0	0	0	0	0	0
	10	21	0	0	0	0	0	0
	10	22	0	0	0	0	0	0
	10	23	0	0	0	0	0	0.001
	10	24	0	0	0	0	0	0.0042
	10	25	0	0	0	0	0	0.002
	10	26	0	0	0	0	0	0
	10	27	0	0	0	0	0	0
Source Data
	label	worm #	replicate #	sensed encounter #	β_0	+ β_k ρ_k	+ β_s τ_s	+ β_h ρ_h	+ β_e ρ_e	observed		* predicted probability of exploitation estimated for each sensed encounter using models with increasing number of covariates
	2	1	1	1	0.224328	0.18072	0.18743	0.0493136	0.0674416	0.00415996		* observed probability of exploitation estimated using GMM classifier as described in methods, Figure 2H, and Figure 2 - supplement 6
	2	1	1	2	0.224328	0.184505	0.234417	0.2387	0.227677	0.0147129		* exploitations were simulated from a Bernoulli distribution of these probabilities
	2	1	1	3	0.224328	0.186808	0.266603	0.258383	0.30213	0.999987
	2	2	1	1	0.224328	0.176277	0.140961	0.0391966	0.0321748	3.65703e-06
	2	2	1	2	0.224328	0.1787	0.164253	0.189456	0.097535	0.000458122
	2	2	1	3	0.224328	0.179089	0.16734	0.190408	0.101612	0.00298312
	2	3	1	1	0.224328	0.176277	0.140961	0.0391966	0.0321748	0.0126655
	2	3	1	2	0.224328	0.177706	0.151997	0.179883	0.0804356	0.000258979
	2	3	1	3	0.224328	0.185859	0.251937	0.253588	0.269212	0.999996
	2	4	1	1	0.224328	0.177919	0.156763	0.0426566	0.0423242	0.000747337
	2	4	1	2	0.224328	0.178201	0.158474	0.18389	0.0889882	0.0155265
	2	4	1	3	0.224328	0.179239	0.167728	0.19115	0.102217	0.000241977
	2	4	1	4	0.224328	0.179467	0.169111	0.191655	0.104053	0.589089
	2	4	1	5	0.224328	0.182386	0.167939	0.193673	0.368941	0.233457
	2	4	1	6	0.224328	0.183062	0.150183	0.180009	0.294514	0.999947
	2	4	1	7	0.224328	0.186596	0.153561	0.185414	0.302016	0.99999
	6	5	1	1	0.224328	0.281099	0.318926	0.122864	0.184158	1
	6	6	1	1	0.224328	0.277094	0.279034	0.10882	0.127802	0.00686985
	6	6	1	2	0.224328	0.278221	0.28757	0.307512	0.226417	0.00535144
	6	6	1	3	0.224328	0.28466	0.35248	0.354522	0.365247	1
	6	7	1	1	0.224328	0.273095	0.243136	0.0964224	0.0876656	0.000472202
	6	7	1	2	0.224328	0.27917	0.297307	0.317402	0.246773	1
	6	7	1	3	0.224328	0.294289	0.258082	0.30281	0.409831	0.978136
	6	8	1	1	0.224328	0.274357	0.254038	0.10017	0.0988258	0.00599247
	6	8	1	2	0.224328	0.277806	0.283695	0.306376	0.219661	0.999984
	6	8	1	3	0.224328	0.28461	0.248906	0.287936	0.394374	1
	10	9	1	1	0.224328	0.341325	0.323614	0.157199	0.154245	7.28341e-05
	10	9	1	2	0.224328	0.344193	0.344517	0.369483	0.272587	0.0248665
	10	9	1	3	0.224328	0.346435	0.359045	0.37914	0.300732	0.426891
	10	9	1	4	0.224328	0.348566	0.370164	0.386873	0.322572	1
	10	10	1	1	0.224328	0.341246	0.323026	0.156934	0.153458	0.0014498
	10	10	1	2	0.224328	0.343636	0.339024	0.365462	0.26175	0.0135739
	10	10	1	3	0.224328	0.344563	0.343224	0.367558	0.269015	4.48303e-07
	10	10	1	4	0.224328	0.344742	0.344355	0.367872	0.270969	1
	10	11	1	1	0.224328	0.345107	0.35288	0.170516	0.196553	0.00194178
	10	11	1	2	0.224328	0.346185	0.359487	0.378581	0.301657	0.999994
	10	11	1	3	0.224328	0.358217	0.334614	0.373944	0.486094	0.999967
	10	11	1	4	0.224328	0.366028	0.335063	0.374322	0.467197	0.999737
	10	12	1	1	0.224328	0.339554	0.31054	0.151325	0.137389	0.000153434
	10	12	1	2	0.224328	0.339977	0.312309	0.345651	0.212931	0.000906364
	10	12	1	3	0.224328	0.340758	0.316183	0.348675	0.219493	0.00719679
	10	12	1	4	0.224328	0.348638	0.37569	0.394111	0.33648	1
	10	12	1	5	0.224328	0.368226	0.340566	0.386144	0.489184	0.995014
	0	13	1	1	0.224328	0.00918687	0.00536169	0.000234628	0.000195318	8.72728e-05
	0	13	1	2	0.224328	0.00918687	0.00679551	0.00935543	0.00184508	1.58068e-06
	0	13	1	3	0.224328	0.00918687	0.0123372	0.0135229	0.00761998	7.23314e-05
	0	14	1	1	0.224328	0.00918687	0.00533011	0.000233767	0.000192593	2.01394e-05
	0	14	1	2	0.224328	0.00918687	0.00815801	0.010473	0.00284929	2.15877e-05
	0.2	15	1	1	0.224328	0.0572864	0.0764578	0.007819	0.0210072	0.000159827
	5	18	1	1	0.224328	0.255914	0.229725	0.0855456	0.0805119	3.3482e-05
	5	18	1	2	0.224328	0.256395	0.232732	0.263058	0.145736	7.96062e-06
	5	18	1	3	0.224328	0.256775	0.235227	0.264805	0.149552	0.000439808
	5	18	1	4	0.224328	0.25707	0.236592	0.265773	0.151585	0.0488501
	5	18	1	5	0.224328	0.260092	0.260343	0.284336	0.192108	0.0193303
	5	19	1	1	0.224328	0.260982	0.273749	0.0998707	0.129409	0.0208315
	5	19	1	2	0.224328	0.262139	0.280913	0.29718	0.230472	0.000234552
	5	19	1	3	0.224328	0.262468	0.282578	0.29782	0.233345	0.999907
	5	19	1	4	0.224328	0.26792	0.233827	0.271001	0.383789	0.0219792
	5	19	1	5	0.224328	0.268556	0.235581	0.269421	0.386608	2.918e-06
	5	19	1	6	0.224328	0.275045	0.297562	0.316301	0.564466	0.999612
	5	20	1	1	0.224328	0.25868	0.252978	0.0930819	0.104484	0.0087689
	5	20	1	2	0.224328	0.265359	0.314539	0.323511	0.30218	0.00112099
	5	20	1	3	0.224328	0.265951	0.31855	0.322022	0.308743	1
	5	21	1	1	0.224328	0.259741	0.26239	0.09615	0.115359	0.017999
	5	21	1	2	0.224328	0.260247	0.264337	0.285352	0.199029	0.553178
	5	21	1	3	0.224328	0.267835	0.332721	0.336488	0.341943	0.999999
	3	22	1	1	0.224328	0.201094	0.170794	0.0521002	0.0466052	0.000421453
	3	22	1	2	0.224328	0.208286	0.253302	0.262835	0.23884	0.000211795
	3	22	1	3	0.224328	0.208603	0.256313	0.259848	0.243014	0.999992
	3	22	1	4	0.224328	0.213915	0.18277	0.216742	0.342275	0.00105162
	3	22	1	5	0.224328	0.214139	0.183825	0.214384	0.343656	0.999134
	3	23	1	1	0.224328	0.20216	0.181489	0.0547317	0.0546745	3.0504e-05
	3	23	1	2	0.224328	0.202936	0.18879	0.2141	0.116943	0.00132706
	3	23	1	3	0.224328	0.203247	0.190697	0.215211	0.11967	0.0544025
	3	23	1	4	0.224328	0.205273	0.210945	0.230634	0.153277	0.999986
	3	23	1	5	0.224328	0.210286	0.177698	0.211719	0.33287	0.0148393
	3	23	1	6	0.224328	0.210758	0.180831	0.211256	0.341548	0.562114
	3	23	1	7	0.224328	0.211379	0.181779	0.212228	0.343978	6.42459e-06
	3	23	1	8	0.224328	0.211555	0.183443	0.21317	0.349479	0.919371
	3	23	1	9	0.224328	0.212627	0.178644	0.210754	0.325553	0.999833
	3	23	1	10	0.224328	0.215804	0.182429	0.21582	0.333702	0.438571
	3	24	1	1	0.224328	0.200794	0.167885	0.0513831	0.0445534	0.000118786
	3	24	1	2	0.224328	0.20145	0.173316	0.202824	0.0946971	0.000376753
	3	24	1	3	0.224328	0.202793	0.185998	0.212506	0.11275	3.23444e-05
	3	24	1	4	0.224328	0.20387	0.196923	0.22014	0.129586	4.60896e-05
	3	24	1	5	0.224328	0.212736	0.315924	0.304724	0.387148	0.999955
	3	25	1	1	0.224328	0.21012	0.28067	0.079293	0.173827	0.000184825
	3	25	1	2	0.224328	0.21027	0.281475	0.275971	0.300287	0.999918
	3	25	1	3	0.224328	0.213924	0.181011	0.214466	0.333921	1.68014e-05
	3	25	1	4	0.224328	0.214453	0.18609	0.216256	0.349862	0.997954
	5	26	1	1	0.224328	0.25594	0.227354	0.0849071	0.0781787	0.00443492
	5	26	1	2	0.224328	0.263609	0.293221	0.310025	0.256773	0.0119913
	5	26	1	3	0.224328	0.268618	0.342483	0.341013	0.363504	0.0938452
	5	27	1	1	0.224328	0.255145	0.221056	0.082873	0.0724878	0.0149274
	5	27	1	2	0.224328	0.257022	0.23037	0.262565	0.393832	0.0109618
	5	27	1	3	0.224328	0.258098	0.23654	0.266602	0.411488	0.0224335
	5	27	1	4	0.224328	0.25864	0.238938	0.268064	0.418042	0.0125499
	5	27	1	5	0.224328	0.265992	0.305035	0.318228	0.604783	0.999999
	5	27	1	6	0.224328	0.277258	0.249259	0.288462	0.416997	0.0149902
	5	27	1	7	0.224328	0.277748	0.252096	0.283707	0.421093	0.889824
	5	28	1	1	0.224328	0.255549	0.224238	0.0839004	0.0753276	1.76101e-05
	5	28	1	2	0.224328	0.25587	0.226173	0.258344	0.135513	0.996764
	5	28	1	3	0.224328	0.259472	0.227527	0.262582	0.381103	0.000393408
	5	28	1	4	0.224328	0.263731	0.263166	0.288338	0.486243	9.21235e-06
	5	28	1	5	0.224328	0.274645	0.37782	0.369434	0.758073	0.000595991
	3	29	1	1	0.224328	0.200782	0.165729	0.0509134	0.0430203	9.86201e-05
	3	29	1	2	0.224328	0.201162	0.168553	0.199211	0.0882322	0.810008
	3	29	1	3	0.224328	0.2022	0.166608	0.1986	0.307987	0.0138518
	3	29	1	4	0.224328	0.20275	0.169446	0.200501	0.317214	0.00453007
	3	30	1	1	0.224328	0.203381	0.192175	0.0574244	0.0635202	1.63923e-05
	3	30	1	2	0.224328	0.207821	0.24458	0.255096	0.219102	5.54216e-05
	3	30	1	3	0.224328	0.208461	0.251718	0.257142	0.23291	0.00012889
	3	30	1	4	0.224328	0.213478	0.32552	0.307767	0.40916	0.000810084
	3	30	1	5	0.224328	0.21477	0.345201	0.317131	0.456485	0.99771
	3	31	1	1	0.224328	0.202832	0.186301	0.0559807	0.058515	1.78522e-06
	3	31	1	2	0.224328	0.203063	0.188191	0.213391	0.115791	0.000816389
	3	31	1	3	0.224328	0.204113	0.198343	0.221166	0.131779	0.000249747
	3	31	1	4	0.224328	0.211876	0.298773	0.293035	0.34399	0.99999
	3	32	1	1	0.224328	0.204023	0.199252	0.0591631	0.0699074	0.0060882
	3	32	1	2	0.224328	0.208666	0.254609	0.261937	0.240456	0.00220762
	3	32	1	3	0.224328	0.208999	0.257155	0.260548	0.244401	0.0824589
	3	32	1	4	0.224328	0.209939	0.266645	0.267282	0.265325	0.00797954
	3	32	1	5	0.224328	0.216001	0.3599	0.330256	0.494303	0.500104
	6	33	1	1	0.224328	0.27331	0.248065	0.0979596	0.0927455	0.119844
	6	33	1	2	0.224328	0.273974	0.250145	0.281156	0.160548	0.0810908
	6	33	1	3	0.224328	0.274594	0.252208	0.282728	0.163543	0.0422582
	6	33	1	4	0.224328	0.275443	0.256311	0.285904	0.169974	0.160324
	6	33	1	5	0.224328	0.277094	0.266513	0.293746	0.186976	0.000776196
	6	33	1	6	0.224328	0.278753	0.2804	0.303425	0.211726	0.000232799
	6	33	1	7	0.224328	0.279038	0.281593	0.303414	0.213437	0.000115483
	6	33	1	8	0.224328	0.279264	0.282643	0.304139	0.215257	0.0028688
	6	33	1	9	0.224328	0.279957	0.28755	0.307866	0.224414	0.00559519
	6	33	1	10	0.224328	0.280525	0.29153	0.310556	0.231832	0.182305
	6	33	1	11	0.224328	0.28442	0.326879	0.336689	0.304701	0.999017
	6	33	1	12	0.224328	0.288235	0.256627	0.292548	0.406324	0.0343793
	6	33	1	13	0.224328	0.288844	0.259593	0.292752	0.413198	0.999915
	6	33	1	14	0.224328	0.295007	0.271004	0.306035	0.436644	0.29077
	6	34	1	1	0.224328	0.27431	0.256793	0.100961	0.10194	0.999809
	6	34	1	2	0.224328	0.279898	0.251036	0.28696	0.409972	5.04404e-05
	6	34	1	3	0.224328	0.280249	0.253102	0.285188	0.413886	0.00296847
	6	34	1	4	0.224328	0.281936	0.256572	0.288941	0.417798	0.000144562
	6	34	1	5	0.224328	0.282236	0.25808	0.289185	0.421411	0.000102312
	6	34	1	6	0.224328	0.282654	0.260954	0.291317	0.429482	1
	6	35	1	1	0.224328	0.272395	0.240286	0.0952915	0.0850246	0.0555898
	6	35	1	2	0.224328	0.276095	0.268024	0.295691	0.191178	0.999996
	6	35	1	3	0.224328	0.284748	0.248387	0.288795	0.394539	0.000157909
	6	35	1	4	0.224328	0.286038	0.258188	0.291236	0.419677	0.00010849
	6	35	1	5	0.224328	0.286367	0.260246	0.292127	0.425045	0.999999
	6	36	1	1	0.224328	0.276165	0.273644	0.106783	0.121324	0.000244125
	6	36	1	2	0.224328	0.2833	0.344855	0.349739	0.34914	1
	0.5	37	1	1	0.224328	0.0801428	0.0626893	0.00969802	0.00915471	6.37761e-07
	0.5	37	1	2	0.224328	0.0803095	0.0638271	0.0800405	0.0263093	8.06578e-05
	0.5	37	1	3	0.224328	0.0808888	0.0679139	0.0835948	0.0304134	0.0910323
	0.5	37	1	4	0.224328	0.081219	0.0691857	0.0845051	0.0316362	0.00563593
	0.5	37	1	5	0.224328	0.0829357	0.0840146	0.0968153	0.0498993	0.0374493
	0.5	37	1	6	0.224328	0.0831416	0.0849978	0.0965082	0.0508987	0.171376
	0.5	38	1	1	0.224328	0.0792493	0.0563326	0.00893971	0.00709115	0.00324509
	0.5	38	1	2	0.224328	0.0810658	0.0686873	0.0850391	0.0313328	4.56379e-07
	0.5	38	1	3	0.224328	0.0833847	0.0905044	0.101955	0.0596008	0.998299
	0.5	38	1	4	0.224328	0.0879187	0.0920235	0.106492	0.361822	0.00219673
	0.5	39	1	1	0.224328	0.0805352	0.0657055	0.0100523	0.010247	0.0673109
	0.5	39	1	2	0.224328	0.0809436	0.0669958	0.082817	0.0293664	0.00456508
	0.5	39	1	3	0.224328	0.0824786	0.0796779	0.0934326	0.0440919	0.00153045
	0.5	39	1	4	0.224328	0.0870244	0.135336	0.134518	0.149763	4.43568e-06
	0.5	40	1	1	0.224328	0.0802049	0.0631573	0.00975321	0.00931934	0.000415679
	0.5	40	1	2	0.224328	0.0803876	0.0639955	0.0802064	0.0264485	0.0103875
	0.5	40	1	3	0.224328	0.0806284	0.0651883	0.0812344	0.0275768	0.0504461
	0.5	40	1	4	0.224328	0.0808499	0.0574768	0.0753116	0.161174	0.00469916
	0.5	40	1	5	0.224328	0.0814105	0.0605294	0.0781089	0.178105	0.000580036
	0.5	40	1	6	0.224328	0.0822928	0.066905	0.0835279	0.215951	0.845914
	0	41	1	1	0.224328	0.00918687	0.00482485	0.000219723	0.000151989	0.000232321
	0	41	1	2	0.224328	0.00918687	0.00533216	0.00805451	0.00103681	0.0013554
	0	41	1	3	0.224328	0.00918687	0.00562168	0.00832177	0.0011756	0.000322817
	0	44	1	1	0.224328	0.00918687	0.00484282	0.000220232	0.000153338	2.13449e-05
	0	44	1	2	0.224328	0.00918687	0.00496434	0.00770682	0.000874888	0.000186741
	10	45	1	1	0.224328	0.34404	0.309691	0.153505	0.134094	0.00729673
	10	45	1	2	0.224328	0.344622	0.311767	0.347052	0.207759	0.420501
	10	45	1	3	0.224328	0.345782	0.313994	0.349277	0.210893	1
	10	45	1	4	0.224328	0.366843	0.341175	0.387011	0.495097	0.935578
	10	45	1	5	0.224328	0.369672	0.345612	0.379333	0.482636	0.967213
	10	45	1	6	0.224328	0.373428	0.353899	0.386583	0.497594	0.0138863
	10	45	1	7	0.224328	0.373959	0.356237	0.386259	0.501927	0.80321
	10	46	1	1	0.224328	0.345406	0.319956	0.158152	0.147001	0.0266719
	10	46	1	2	0.224328	0.346757	0.32723	0.358345	0.234903	0.999872
	10	46	1	3	0.224328	0.354334	0.328387	0.365702	0.472885	0.209383
	10	46	1	4	0.224328	0.355479	0.331533	0.364125	0.47769	0.997617
	10	46	1	5	0.224328	0.35943	0.328705	0.365444	0.459733	4.60728e-05
	10	46	1	6	0.224328	0.35984	0.330861	0.364792	0.463807	0.00338479
	10	46	1	7	0.224328	0.368175	0.402996	0.418705	0.635787	0.999972
	10	47	1	1	0.224328	0.346602	0.329151	0.162336	0.15922	0.999996
	10	47	1	2	0.224328	0.358667	0.330169	0.371223	0.473384	0.000454158
	10	47	1	3	0.224328	0.36053	0.343558	0.374138	0.503061	1
	10	48	1	1	0.224328	0.345412	0.320005	0.158174	0.147063	0.00952696
	10	48	1	2	0.224328	0.349124	0.345859	0.372666	0.270281	1
	10	48	1	3	0.224328	0.372598	0.373906	0.411746	0.569754	0.000179924
	1	49	1	1	0.224328	0.127117	0.09811	0.0213136	0.0177171	0.00251396
	1	49	1	2	0.224328	0.128225	0.10953	0.131619	0.0544716	0.0215902
	1	49	1	3	0.224328	0.12917	0.119538	0.139009	0.0671512	0.00248632
	1	49	1	4	0.224328	0.12947	0.122382	0.14069	0.0708986	0.0194234
	1	49	1	5	0.224328	0.129657	0.0992332	0.123952	0.225574	0.779473
	1	49	1	6	0.224328	0.130353	0.102862	0.127212	0.241173	0.00320364
	1	49	1	7	0.224328	0.130999	0.10968	0.132428	0.272196	0.0231233
	1	49	1	8	0.224328	0.131344	0.112589	0.134472	0.285297	0.999992
	1	49	1	9	0.224328	0.134697	0.110261	0.135848	0.266679	0.00739393
	1	49	1	10	0.224328	0.134869	0.111378	0.134745	0.270005	0.998364
	1	50	1	1	0.224328	0.127486	0.102104	0.0219627	0.0195781	0.0729066
	1	50	1	2	0.224328	0.128039	0.106663	0.129117	0.0509875	0.938626
	1	50	1	3	0.224328	0.129319	0.105542	0.129196	0.257998	0.893215
	1	50	1	4	0.224328	0.130174	0.103158	0.127466	0.243348	0.00079789
	1	50	1	5	0.224328	0.131753	0.121904	0.142057	0.33078	1
	1	51	1	1	0.224328	0.127216	0.0991701	0.0214863	0.0181997	0.0282646
	1	51	1	2	0.224328	0.128013	0.106519	0.129154	0.05086	0.0340442
	1	51	1	3	0.224328	0.128588	0.111736	0.133006	0.0569781	0.0739805
	1	51	1	4	0.224328	0.130053	0.128094	0.145653	0.0792249	0.008839
	1	51	1	5	0.224328	0.130276	0.129872	0.146117	0.0815745	0.0114809
	1	51	1	6	0.224328	0.130418	0.130616	0.146624	0.0826146	0.783957
	1	51	1	7	0.224328	0.131171	0.103503	0.128005	0.241797	0.00282075
	1	51	1	8	0.224328	0.131642	0.108174	0.131447	0.262721	0.00522993
	1	51	1	9	0.224328	0.131886	0.110102	0.132801	0.271274	0.0106869
	1	51	1	10	0.224328	0.132505	0.116768	0.138065	0.302169	0.690867
	1	51	1	11	0.224328	0.133032	0.103185	0.128271	0.234491	0.0493166
	1	51	1	12	0.224328	0.133213	0.10364	0.128466	0.236079	0.000693815
	1	51	1	13	0.224328	0.135189	0.12833	0.148111	0.34998	0.142522
	1	51	1	14	0.224328	0.135565	0.105794	0.130997	0.238848	2.56784e-05
	1	51	1	15	0.224328	0.135712	0.107131	0.131902	0.244552	0.00101631
	1	51	1	16	0.224328	0.13595	0.109105	0.133499	0.253182	4.3336e-05
	1	52	1	1	0.224328	0.127293	0.0999952	0.0216205	0.018581	0.00117337
	1	52	1	2	0.224328	0.128383	0.11085	0.13262	0.0560407	0.0190454
	1	52	1	3	0.224328	0.129139	0.119083	0.138553	0.0665027	0.00207466
	1	52	1	4	0.224328	0.129638	0.124804	0.142569	0.0743728	6.55408e-05
	1	52	1	5	0.224328	0.129793	0.126341	0.14346	0.0765016	0.999843
	1	52	1	6	0.224328	0.131641	0.101583	0.127389	0.233087	0.000373518
	1	52	1	7	0.224328	0.132183	0.107229	0.130987	0.257832	0.147454
	1	52	1	8	0.224328	0.132496	0.108518	0.131903	0.26318	0.999362
	1	52	1	9	0.224328	0.133907	0.10303	0.128982	0.232527	0.10425
	1	52	1	10	0.224328	0.134432	0.106671	0.131347	0.247848	0.00153976
	1	52	1	11	0.224328	0.135052	0.11358	0.136689	0.278969	0.477237
	1	52	1	12	0.224328	0.135583	0.117071	0.139344	0.29433	2.01957e-05
	0.3	53	1	1	0.224328	0.0573879	0.0433745	0.00540914	0.0051288	8.2372e-06
	0.3	53	1	2	0.224328	0.0574867	0.043599	0.0563266	0.0159482	0.000446398
	0.3	53	1	3	0.224328	0.0583758	0.0468865	0.0597036	0.0187428	2.20762e-06
	0.3	53	1	4	0.224328	0.0591787	0.0504324	0.0626609	0.0219864	0.000480523
	0.3	53	1	5	0.224328	0.0657927	0.0942454	0.100803	0.0899419	0.00598533
	0.3	53	1	6	0.224328	0.0661253	0.0964617	0.0965066	0.0918225	0.00023917
	0.3	53	1	7	0.224328	0.0671354	0.105683	0.103275	0.112234	0.0104216
	0.3	53	1	8	0.224328	0.0679578	0.113119	0.107992	0.129599	0.00084973
	0.3	54	1	1	0.224328	0.0570578	0.0420365	0.00527002	0.00477568	2.56814e-06
	0.3	55	1	1	0.224328	0.0582134	0.0469179	0.0057738	0.00613616	1.01215e-06
	0.3	55	1	2	0.224328	0.0661479	0.100391	0.106339	0.104415	0.00081863
	0.3	55	1	3	0.224328	0.0663533	0.101119	0.0993707	0.102206	7.11482e-06
	0.3	56	1	1	0.224328	0.0583843	0.0476883	0.0058524	0.00636928	9.91468e-05
	0.3	56	1	2	0.224328	0.0585439	0.0480812	0.0602224	0.0197783	2.76532e-05
	0.3	56	1	3	0.224328	0.0662975	0.10087	0.106523	0.105214	0.000144136
	2	57	1	1	0.224328	0.177341	0.144259	0.0401023	0.0339966	0.00104863
	2	57	1	2	0.224328	0.178799	0.157388	0.184091	0.087222	0.0147319
	2	57	1	3	0.224328	0.179239	0.160307	0.185643	0.090952	0.00881216
	2	57	1	4	0.224328	0.179749	0.163879	0.188349	0.0958713	0.0367756
	2	57	1	5	0.224328	0.180229	0.166562	0.190354	0.0995704	0.0744782
	2	57	1	6	0.224328	0.180736	0.169363	0.192481	0.103515	0.043005
	2	57	1	7	0.224328	0.181072	0.170912	0.193552	0.105653	0.161055
	2	57	1	8	0.224328	0.181592	0.17341	0.195567	0.109252	0.999927
	2	57	1	9	0.224328	0.184892	0.151002	0.18284	0.296312	1.15742e-05
	2	57	1	10	0.224328	0.185055	0.152044	0.181724	0.298766	0.00395645
	2	57	1	11	0.224328	0.185322	0.152919	0.182504	0.301717	8.13876e-05
	2	57	1	12	0.224328	0.187607	0.177457	0.201713	0.39361	0.999908
	2	57	1	13	0.224328	0.190565	0.15546	0.187789	0.298279	1.32216e-05
	2	57	1	14	0.224328	0.191374	0.163632	0.192554	0.326987	0.000250825
	2	58	1	1	0.224328	0.177771	0.148357	0.0410038	0.0365427	0.000258437
	2	58	1	2	0.224328	0.17807	0.150462	0.178222	0.0779835	0.0064328
	2	58	1	3	0.224328	0.179304	0.161681	0.187126	0.0930484	0.00469455
	2	58	1	4	0.224328	0.179547	0.162739	0.187317	0.0942731	0.0347134
	2	58	1	5	0.224328	0.17987	0.163822	0.188235	0.0956658	0.0145781
	2	58	1	6	0.224328	0.18068	0.170519	0.193446	0.105429	0.0183003
	2	58	1	7	0.224328	0.183549	0.202665	0.217366	0.160316	2.05023e-05
	2	58	1	8	0.224328	0.185112	0.222734	0.229949	0.199797	0.999999
	2	59	1	1	0.224328	0.177843	0.149045	0.0411549	0.0369816	0.00972555
	2	59	1	2	0.224328	0.178411	0.152794	0.180161	0.0809506	0.0163625
	2	59	1	3	0.224328	0.178904	0.156228	0.182708	0.085364	1.54856e-05
	2	59	1	4	0.224328	0.18904	0.291376	0.280743	0.366235	0.999772
	2	60	1	1	0.224328	0.178263	0.153169	0.0420598	0.0396854	0.080662
	2	60	1	2	0.224328	0.178983	0.15656	0.183111	0.0858138	0.0359882
	2	60	1	3	0.224328	0.180237	0.16721	0.191302	0.100696	1
	3	61	1	1	0.224328	0.202635	0.186747	0.0560144	0.0589627	0.984306
	3	61	1	2	0.224328	0.204571	0.173907	0.205134	0.32971	0.0042985
	3	61	1	3	0.224328	0.205258	0.179274	0.208348	0.347601	0.24727
	3	61	1	4	0.224328	0.205989	0.183175	0.211337	0.360583	0.999832
	3	61	1	5	0.224328	0.215758	0.255789	0.269264	0.590952	0.000145712
	0.2	62	1	1	0.224328	0.0489977	0.0361182	0.00409412	0.00382574	0.00285614
	10	63	1	1	0.224328	0.349243	0.375224	0.181753	0.232059	3.21617e-05
	10	63	1	2	0.224328	0.349639	0.377255	0.39061	0.336633	0.99918
	10	63	1	3	0.224328	0.356515	0.340056	0.373598	0.498705	0.0181268
	10	63	1	4	0.224328	0.357806	0.330829	0.364593	0.465991	0.999918
	10	63	1	5	0.224328	0.365374	0.340333	0.377361	0.482168	0.999964
	0	64	1	1	0.224328	0.00918687	0.0060161	0.000252063	0.000256867	1.45857e-05
	0	64	1	2	0.224328	0.00918687	0.00894793	0.0110883	0.00354983	3.38049e-05
	0	64	1	3	0.224328	0.00918687	0.0107465	0.0124169	0.00548797	9.13694e-05
	5	65	1	1	0.224328	0.259839	0.246102	0.0916667	0.0961379	0.00335898
	5	65	1	2	0.224328	0.260255	0.247943	0.274558	0.168517	0.0559593
	5	65	1	3	0.224328	0.26864	0.325636	0.332944	0.324226	0.257083
	5	65	1	4	0.224328	0.270494	0.243491	0.276201	0.403902	0.000490857
	5	65	1	5	0.224328	0.272136	0.257392	0.285923	0.444101	0.0569942
	5	65	1	6	0.224328	0.273031	0.261568	0.288527	0.455175	0.998271
	5	65	1	7	0.224328	0.276653	0.246342	0.281414	0.400736	0.00481348
	5	65	1	8	0.224328	0.277264	0.250522	0.282557	0.411541	0.999405
	0.3	66	1	1	0.224328	0.0577467	0.0433287	0.00544004	0.00508402	3.70609e-05
	0.3	66	1	2	0.224328	0.0580082	0.044171	0.0570575	0.0162864	0.000817363
	0.3	66	1	3	0.224328	0.058467	0.0453961	0.0583018	0.0172508	0.000546449
	0.3	66	1	4	0.224328	0.0615404	0.0603669	0.0725525	0.032787	0.775284
	0.3	66	1	5	0.224328	0.0632976	0.0681798	0.0778449	0.042259	0.00474589
	0.3	66	1	6	0.224328	0.064106	0.0726928	0.08057	0.0483781	0.00279068
	0.3	66	1	7	0.224328	0.0667733	0.0934451	0.0969845	0.0849959	0.00115084
	1	67	1	1	0.224328	0.125644	0.09528	0.0206361	0.0166346	0.000217627
	1	67	1	2	0.224328	0.126248	0.101081	0.124409	0.0454024	0.0301109
	1	67	1	3	0.224328	0.126728	0.105182	0.127524	0.0499025	6.61254e-05
	1	67	1	4	0.224328	0.126944	0.106797	0.128615	0.0516966	0.0125939
	1	67	1	5	0.224328	0.127782	0.115287	0.135417	0.0621894	0.0110587
	1	67	1	6	0.224328	0.12801	0.116889	0.136241	0.0641309	0.00165479
	1	67	1	7	0.224328	0.129191	0.131617	0.147539	0.0854501	0.99704
	1	67	1	8	0.224328	0.131226	0.110933	0.134296	0.278976	0.999569
	1	67	1	9	0.224328	0.133235	0.107928	0.132772	0.258158	0.999753
	0.5	68	1	1	0.224328	0.0804902	0.0634824	0.00982238	0.00940603	5.37001e-06
	0.5	68	1	2	0.224328	0.0870173	0.137593	0.137823	0.156657	0.999364
	2	69	1	1	0.224328	0.177797	0.152867	0.0418774	0.039589	0.0240362
	2	69	1	2	0.224328	0.181593	0.192052	0.210283	0.14229	0.996254
	6	70	1	1	0.224328	0.274615	0.252447	0.0998147	0.0969609	0.0561964
	6	70	1	2	0.224328	0.284977	0.352441	0.357384	0.366035	0.999989
	6	70	1	3	0.224328	0.293112	0.26829	0.304812	0.435032	0.999447
	2	71	1	1	0.224328	0.176906	0.145292	0.0401899	0.0347443	0.00735152
	2	71	1	2	0.224328	0.178274	0.157237	0.183739	0.0873433	0.99863
	2	71	1	3	0.224328	0.180434	0.147261	0.177904	0.291968	0.0611952
	2	71	1	4	0.224328	0.180795	0.148535	0.177847	0.295569	0.0248007
	2	72	1	1	0.224328	0.177229	0.148363	0.0408635	0.0366694	0.00221091
	2	72	1	2	0.224328	0.178516	0.160054	0.185743	0.0912242	0.999321
	2	72	1	3	0.224328	0.183622	0.176567	0.201514	0.40243	1
	2	72	1	4	0.224328	0.190654	0.156618	0.191199	0.307709	0.241929
	2	73	1	1	0.224328	0.176652	0.142911	0.0396669	0.0332979	0.00101322
	2	73	1	2	0.224328	0.177204	0.146928	0.175556	0.0738969	0.000665457
	2	73	1	3	0.224328	0.178055	0.154144	0.181162	0.0830694	0.00242333
	2	73	1	4	0.224328	0.179768	0.170908	0.193963	0.106937	0.848019
	2	73	1	5	0.224328	0.181573	0.156298	0.184531	0.323801	0.999999
	2	73	1	6	0.224328	0.187746	0.15338	0.187325	0.301779	0.999951
	2	74	1	1	0.224328	0.176912	0.145345	0.0402015	0.0347769	2.59856e-05
	2	74	1	2	0.224328	0.177069	0.146152	0.174713	0.0729212	1.47472e-05
	2	74	1	3	0.224328	0.178444	0.159247	0.18521	0.0901159	0.0165717
	2	74	1	4	0.224328	0.178932	0.16291	0.187366	0.0950082	0.0308813
	2	74	1	5	0.224328	0.183863	0.220332	0.230383	0.197238	2.0842e-05
	2	74	1	6	0.224328	0.184559	0.229368	0.233263	0.215004	0.999383
	0.3	75	1	1	0.224328	0.0574065	0.0461549	0.00563199	0.00597494	3.27253e-05
	0.3	75	1	2	0.224328	0.0599689	0.0585686	0.0702543	0.0314027	0.000199165
	0.3	77	1	1	0.224328	0.057988	0.0487713	0.00589675	0.00677794	8.77189e-05
	0.2	78	1	1	0.224328	0.0538583	0.0564018	0.00600977	0.0104468	0.00128858
	0.2	78	1	2	0.224328	0.0601889	0.0994428	0.101353	0.113497	2.9239e-05
	0.2	79	1	1	0.224328	0.0511726	0.0442228	0.00487272	0.00602289	4.14716e-05
	3	80	1	1	0.224328	0.204604	0.205417	0.0606903	0.0757816	0.999383
	3	80	1	2	0.224328	0.208885	0.190262	0.219523	0.380965	1
	3	81	1	1	0.224328	0.202812	0.185699	0.0558446	0.0580057	0.00782008
	3	81	1	2	0.224328	0.203267	0.188715	0.213965	0.116505	0.00360642
	3	81	1	3	0.224328	0.203714	0.192071	0.216402	0.121548	0.00985236
	3	81	1	4	0.224328	0.204169	0.195164	0.218663	0.126263	0.0240492
	3	81	1	5	0.224328	0.204616	0.197799	0.220596	0.130298	1
	3	82	1	1	0.224328	0.201859	0.175895	0.053432	0.0502804	0.989302
	3	82	1	2	0.224328	0.203468	0.167553	0.200059	0.308988	2.65507e-05
	3	82	1	3	0.224328	0.203623	0.168426	0.199847	0.311336	0.0125018
	3	82	1	4	0.224328	0.208332	0.218135	0.238366	0.484124	1
	3	83	1	1	0.224328	0.20252	0.182645	0.0550936	0.0555224	1.00141e-05
	3	83	1	2	0.224328	0.203366	0.190882	0.215725	0.119977	0.000843897
	3	83	1	3	0.224328	0.203813	0.194568	0.218123	0.125568	0.0335012
	3	83	1	4	0.224328	0.204172	0.19651	0.219507	0.128489	0.999861
	3	83	1	5	0.224328	0.20856	0.184141	0.21524	0.359777	0.019025
	3	83	1	6	0.224328	0.209382	0.191286	0.218188	0.382739	0.999999
	0.5	84	1	1	0.224328	0.0799484	0.0593266	0.00933139	0.00799656	0.000608663
	0.5	84	1	2	0.224328	0.0800831	0.0596612	0.0767262	0.0223636	0.000208726
	0.5	84	1	3	0.224328	0.0828028	0.0822152	0.0962139	0.0475927	0.011586
	0.5	84	1	4	0.224328	0.0857193	0.114939	0.119643	0.103047	6.75676e-05
	0.5	84	1	5	0.224328	0.088076	0.150951	0.142362	0.188523	0.00167126
	0.5	84	1	6	0.224328	0.0881912	0.151637	0.140715	0.188926	0.0005103
	0.5	85	1	1	0.224328	0.0794735	0.0560427	0.00893608	0.0069807	0.000291407
	0.5	85	1	2	0.224328	0.0845037	0.101802	0.11227	0.0788449	0.000105835
	0.5	85	1	3	0.224328	0.085122	0.109075	0.113712	0.0909064	0.0219292
	0.5	85	1	4	0.224328	0.085306	0.110316	0.114243	0.0930378	8.38437e-06
	0.5	85	1	5	0.224328	0.0853614	0.110828	0.114492	0.0939662	0.999996
	0.5	86	1	1	0.224328	0.0808076	0.0657703	0.0100943	0.0102373	1.06375e-05
	0.5	86	1	2	0.224328	0.0832631	0.0879461	0.100238	0.0556922	0.000784138
	0.5	86	1	3	0.224328	0.0834387	0.0890582	0.0994039	0.0568042	0.0171144
	0.5	86	1	4	0.224328	0.0836467	0.0900801	0.100211	0.0582368	0.012761
	0.5	86	1	5	0.224328	0.0842255	0.0954327	0.104343	0.0665723	0.00196312
	0.5	86	1	6	0.224328	0.084936	0.102931	0.109718	0.0792378	0.00978981
	0.5	86	1	7	0.224328	0.0854416	0.108231	0.113224	0.0887727	0.00173049
	0.5	86	1	8	0.224328	0.0864317	0.120876	0.122095	0.114333	0.999933
	0.5	87	1	1	0.224328	0.0853959	0.113867	0.0154476	0.0390002	0.999996
	5	88	1	1	0.224328	0.258654	0.249292	0.0920516	0.100236	0.121504
	5	88	1	2	0.224328	0.262666	0.281299	0.299538	0.231447	0.000913753
	5	88	1	3	0.224328	0.264952	0.301968	0.3124	0.272794	0.999997
	5	88	1	4	0.224328	0.273843	0.238671	0.27854	0.389372	0.999945
	5	89	1	1	0.224328	0.255052	0.219696	0.0824655	0.0712682	0.00556341
	5	89	1	2	0.224328	0.255769	0.223581	0.256792	0.131589	0.00648853
	5	89	1	3	0.224328	0.256215	0.225155	0.257853	0.133671	0.00129356
	5	89	1	4	0.224328	0.256758	0.227948	0.26	0.137699	0.0326234
	5	89	1	5	0.224328	0.258588	0.239981	0.269557	0.156373	0.00739641
	5	89	1	6	0.224328	0.259366	0.244969	0.272494	0.16413	0.0135303
	5	89	1	7	0.224328	0.25976	0.246478	0.273393	0.166358	0.0460415
	5	89	1	8	0.224328	0.261084	0.255273	0.280276	0.181236	0.004479
	5	89	1	9	0.224328	0.262902	0.27002	0.290892	0.207735	0.0056921
	5	89	1	10	0.224328	0.263337	0.272506	0.291756	0.211864	0.0264429
	5	89	1	11	0.224328	0.264573	0.281455	0.298506	0.228883	0.00101861
	5	89	1	12	0.224328	0.268025	0.314593	0.322335	0.297753	1
	5	90	1	1	0.224328	0.254732	0.217214	0.0816643	0.0691268	0.000167106
	5	90	1	2	0.224328	0.255959	0.225628	0.258568	0.134748	9.50713e-05
	5	90	1	3	0.224328	0.257596	0.237896	0.267681	0.153617	4.27512e-05
	5	90	1	4	0.224328	0.258621	0.245581	0.272785	0.165918	6.94491e-06
	5	90	1	5	0.224328	0.265289	0.307392	0.318973	0.285891	0.995313
	5	90	1	6	0.224328	0.271208	0.263129	0.292132	0.467286	0.999996
	5	91	1	1	0.224328	0.26421	0.301188	0.109143	0.16732	0.936008
	5	91	1	2	0.224328	0.265956	0.231083	0.266134	0.375478	0.0113169
	5	91	1	3	0.224328	0.266645	0.23506	0.268423	0.386497	0.0251036
	5	91	1	4	0.224328	0.267382	0.239012	0.271382	0.397732	1
	6	92	1	1	0.224328	0.277645	0.280563	0.109536	0.129524	0.00359544
	6	92	1	2	0.224328	0.278012	0.282044	0.303377	0.215403	0.00243144
	6	92	1	3	0.224328	0.278583	0.28575	0.306113	0.222227	0.00468763
	6	92	1	4	0.224328	0.284565	0.345635	0.349911	0.348868	1
	6	93	1	1	0.224328	0.278666	0.290421	0.112982	0.142388	0.999765
	6	93	1	2	0.224328	0.287427	0.289568	0.317225	0.510942	0.999998
	6	94	1	1	0.224328	0.273853	0.246211	0.0976491	0.0905701	0.0069569
	6	94	1	2	0.224328	0.276501	0.266314	0.294038	0.187386	0.241473
	6	94	1	3	0.224328	0.280724	0.301875	0.319669	0.254149	0.999998
	6	94	1	4	0.224328	0.290209	0.258064	0.297785	0.412527	0.999984
	1	95	1	1	0.224328	0.126172	0.0963935	0.0208924	0.0170637	0.000100997
	1	95	1	2	0.224328	0.126928	0.104017	0.12691	0.0484565	0.000771775
	1	95	1	3	0.224328	0.127346	0.108059	0.129803	0.0530473	0.000218654
	1	95	1	4	0.224328	0.128182	0.117375	0.137045	0.0647832	4.57532e-05
	1	95	1	5	0.224328	0.12899	0.127406	0.144324	0.0788824	1
	1	96	1	1	0.224328	0.131159	0.163573	0.0314035	0.0652836	0.999999
	1	97	1	1	0.224328	0.131032	0.161434	0.0310764	0.063113	0.999999
	1	97	1	2	0.224328	0.135135	0.104066	0.131818	0.237627	0.000276651
	1	98	1	1	0.224328	0.126982	0.105172	0.02231	0.021224	0.0121772
	1	98	1	2	0.224328	0.127274	0.107161	0.129046	0.0519701	0.0189121
	1	98	1	3	0.224328	0.132631	0.184404	0.186478	0.189884	0.999989
	10	99	1	1	0.224328	0.351507	0.390877	0.189407	0.259353	0.999216
	10	99	1	2	0.224328	0.356186	0.323897	0.361616	0.45417	0.999995
	10	99	1	3	0.224328	0.367467	0.340475	0.380531	0.482061	0.999837
	10	100	1	1	0.224328	0.340862	0.306316	0.150478	0.131306	0.000231751
	10	100	1	2	0.224328	0.344879	0.335503	0.364683	0.253728	0.999921
	10	100	1	3	0.224328	0.354643	0.339548	0.374438	0.50414	0.9795
	10	100	1	4	0.224328	0.361159	0.357644	0.386326	0.534642	0.999998
	10	101	1	1	0.224328	0.341236	0.30904	0.1517	0.134613	0.00571586
	10	101	1	2	0.224328	0.342593	0.316775	0.350075	0.219012	0.00331861
	10	101	1	3	0.224328	0.351967	0.390094	0.405367	0.365656	1
	10	102	1	1	0.224328	0.346584	0.350008	0.170309	0.190942	0.00672537
	10	102	1	2	0.224328	0.348155	0.359748	0.379786	0.300107	0.000497867
	10	102	1	3	0.224328	0.36636	0.523165	0.499109	0.659245	0.99994
	2	103	1	1	0.224328	0.176885	0.14181	0.0395135	0.03257	0.000739155
	2	103	1	2	0.224328	0.177857	0.149984	0.178223	0.0775733	0.00207477
	2	103	1	3	0.224328	0.179755	0.167994	0.192083	0.102393	0.0282999
	2	103	1	4	0.224328	0.180396	0.172827	0.194801	0.109303	0.0141571
	2	103	1	5	0.224328	0.180705	0.173918	0.195441	0.110751	0.999983
	2	103	1	6	0.224328	0.184931	0.151715	0.183942	0.300171	0.0381252
	2	103	1	7	0.224328	0.185518	0.155836	0.184843	0.313573	0.00413595
	2	103	1	8	0.224328	0.185973	0.159451	0.187476	0.32673	0.00957394
	2	103	1	9	0.224328	0.186576	0.163754	0.1908	0.342432	0.999967
	2	103	1	10	0.224328	0.190601	0.160631	0.192166	0.319186	0.0388316
	2	103	1	11	0.224328	0.191041	0.163393	0.192041	0.327453	0.095795
	2	104	1	1	0.224328	0.176851	0.141498	0.0394449	0.0323866	1.19633e-05
	2	104	1	2	0.224328	0.180445	0.177979	0.200279	0.118351	0.13537
	2	104	1	3	0.224328	0.181039	0.181126	0.20061	0.12255	0.999948
	2	104	1	4	0.224328	0.184397	0.149332	0.181498	0.291247	2.85761e-05
	2	104	1	5	0.224328	0.18455	0.150344	0.180325	0.29358	0.00648492
	2	104	1	6	0.224328	0.184849	0.152056	0.181742	0.299714	0.0189968
	2	104	1	7	0.224328	0.185286	0.154554	0.183759	0.308654	0.00840077
	2	104	1	8	0.224328	0.185603	0.156714	0.185329	0.316404	0.0268952
	2	104	1	9	0.224328	0.187007	0.170327	0.196026	0.367238	0.45938
	2	104	1	10	0.224328	0.187968	0.157251	0.186939	0.309201	0.99996
	1	105	1	1	0.224328	0.127861	0.118175	0.0243336	0.0285205	0.244171
	1	105	1	2	0.224328	0.128375	0.121732	0.139962	0.0707811	0.00162998
	1	105	1	3	0.224328	0.130725	0.154761	0.164395	0.125972	0.827168
	1	105	1	4	0.224328	0.131375	0.159259	0.166295	0.133765	0.999997
	1	106	1	1	0.224328	0.126759	0.105041	0.0222489	0.0211949	0.00182973
	1	106	1	2	0.224328	0.127087	0.107992	0.129604	0.0530964	0.104947
	1	106	1	3	0.224328	0.127475	0.110009	0.13124	0.0554055	0.997964
	1	106	1	4	0.224328	0.131364	0.132294	0.150738	0.386428	5.84814e-05
	1	107	1	1	0.224328	0.127324	0.111586	0.0232923	0.0246748	0.139276
	1	107	1	2	0.224328	0.128059	0.118312	0.137594	0.066155	0.945432
	1	107	1	3	0.224328	0.129676	0.109655	0.132549	0.277237	0.844202
	1	107	1	4	0.224328	0.130305	0.10089	0.12568	0.232008	1
	1	108	1	1	0.224328	0.126683	0.104189	0.0221122	0.0207657	0.000923514
	1	108	1	2	0.224328	0.128018	0.119373	0.138721	0.0677788	0.590989
	1	108	1	3	0.224328	0.128551	0.0993341	0.123856	0.229772	0.0368312
	1	108	1	4	0.224328	0.131074	0.128806	0.147261	0.368521	7.73704e-05
	1	108	1	5	0.224328	0.133479	0.165202	0.172334	0.531202	0.999727
	0	109	1	1	0.224328	0.00918687	0.00595225	0.000250395	0.000250428	2.45414e-05
	0	110	1	1	0.224328	0.00918687	0.00520812	0.000230423	0.000182276	3.11016e-05
	0	110	1	2	0.224328	0.00918687	0.00725578	0.00974179	0.0021562	0.0141533
	0	111	1	1	0.224328	0.00918687	0.00566736	0.000242865	0.000222848	7.75673e-06
	0	112	1	1	0.224328	0.00918687	0.00688269	0.000274104	0.000353854	0.000741832
	5	113	1	1	0.224328	0.257948	0.227323	0.0856942	0.0774414	0.00945773
	5	113	1	2	0.224328	0.267823	0.316622	0.328022	0.30474	0.999995
	5	113	1	3	0.224328	0.276013	0.241563	0.280824	0.392632	0.999934
	3	114	1	1	0.224328	0.202319	0.172388	0.0528119	0.0474748	0.00697191
	3	114	1	2	0.224328	0.203688	0.18462	0.211903	0.109944	0.055111
	3	114	1	3	0.224328	0.204639	0.192319	0.217235	0.121301	0.113262
	3	114	1	4	0.224328	0.205335	0.19705	0.220523	0.128478	0.669672
	3	114	1	5	0.224328	0.20629	0.201674	0.224149	0.135559	0.994741
	3	114	1	6	0.224328	0.20942	0.187984	0.217405	0.369771	0.999815
	3	114	1	7	0.224328	0.212521	0.178132	0.211607	0.326483	0.999994
	3	115	1	1	0.224328	0.203832	0.187966	0.0566589	0.0596324	0.0143242
	3	115	1	2	0.224328	0.204605	0.194539	0.21861	0.124929	0.000229459
	3	115	1	3	0.224328	0.207531	0.227978	0.243252	0.184045	0.999245
	3	115	1	4	0.224328	0.211595	0.193115	0.222316	0.383724	0.999989
	3	115	1	5	0.224328	0.216982	0.189525	0.22259	0.358614	0.216329
	3	116	1	1	0.224328	0.202361	0.172798	0.0529134	0.0477722	0.00115834
	3	116	1	2	0.224328	0.202751	0.175517	0.204657	0.096927	0.000367634
	3	116	1	3	0.224328	0.202969	0.176556	0.205352	0.0982465	5.27317e-05
	3	116	1	4	0.224328	0.203299	0.179159	0.207344	0.10183	0.000105291
	3	116	1	5	0.224328	0.204979	0.19636	0.220566	0.127822	5.70647e-05
	3	116	1	6	0.224328	0.205179	0.197715	0.220589	0.129626	0.554696
	3	116	1	7	0.224328	0.207146	0.215557	0.234346	0.159991	8.14279e-05
	3	116	1	8	0.224328	0.207821	0.222953	0.23856	0.173155	1
	3	116	1	9	0.224328	0.216155	0.189244	0.224002	0.363534	0.984503
	3	117	1	1	0.224328	0.202375	0.172935	0.0529473	0.0478718	1.25547e-06
	3	117	1	2	0.224328	0.210342	0.268564	0.273861	0.271753	0.00158668
	3	117	1	3	0.224328	0.215317	0.344502	0.319902	0.455276	0.0335593
	3	117	1	4	0.224328	0.215958	0.350615	0.320362	0.468089	0.000630955
	3	117	1	5	0.224328	0.21682	0.363091	0.328305	0.498729	0.640567
	0.3	119	1	1	0.224328	0.0562115	0.0380674	0.00487012	0.00379984	3.74926e-05
	0.3	119	1	2	0.224328	0.0652727	0.0906036	0.100661	0.0836944	5.69298e-05
	0.5	120	1	1	0.224328	0.0797971	0.0573683	0.00911156	0.00736874	0.00901777
	0.5	120	1	2	0.224328	0.0801758	0.0591779	0.0765232	0.0219082	0.000580896
	0.5	120	1	3	0.224328	0.0803059	0.0596417	0.076784	0.0222642	0.0392373
	0.5	120	1	4	0.224328	0.0831973	0.0826908	0.0968296	0.0480083	0.00280269
	0.5	120	1	5	0.224328	0.0840122	0.0905258	0.101108	0.0587487	0.00160379
	0.5	120	1	6	0.224328	0.084257	0.0924543	0.102104	0.0615065	0.000992939
	0.5	120	1	7	0.224328	0.0849963	0.100307	0.10804	0.0743586	0.999115
	0.5	120	1	8	0.224328	0.0868617	0.0667276	0.0855846	0.197849	0.00487449
	0.5	120	1	9	0.224328	0.0870092	0.0674034	0.0851075	0.200542	0.000753649
	0.5	121	1	1	0.224328	0.0846743	0.102987	0.0142949	0.0304084	0.00232501
	10	122	1	1	0.224328	0.343215	0.330538	0.160893	0.163126	0.0293809
	10	122	1	2	0.224328	0.343903	0.332208	0.360111	0.247337	0.992427
	10	122	1	3	0.224328	0.347337	0.314766	0.351743	0.446261	0.00381946
	10	122	1	4	0.224328	0.348672	0.32294	0.356242	0.46588	0.972898
	10	122	1	5	0.224328	0.352775	0.331864	0.365221	0.481809	1
	6	123	1	1	0.224328	0.275531	0.238275	0.0960221	0.0818944	0.00720417
	6	123	1	2	0.224328	0.286608	0.344815	0.353749	0.345803	0.999813
	6	123	1	3	0.224328	0.291299	0.258814	0.295645	0.407085	0.999996
	6	124	1	1	0.224328	0.275531	0.238275	0.0960221	0.0818944	0.00232616
	6	124	1	2	0.224328	0.2766	0.245311	0.27911	0.150444	0.00132198
	6	124	1	3	0.224328	0.28266	0.300464	0.320718	0.249442	1.80501e-05
	6	124	1	4	0.224328	0.287279	0.349035	0.352134	0.352769	0.998718
	6	124	1	5	0.224328	0.29357	0.28719	0.316278	0.487279	0.999965
	6	125	1	1	0.224328	0.277503	0.255483	0.101986	0.0991138	0.0278164
	6	125	1	2	0.224328	0.279734	0.273306	0.299536	0.197254	0.0049003
	6	125	1	3	0.224328	0.28426	0.315907	0.330134	0.280467	0.999883
	6	125	1	4	0.224328	0.289767	0.260618	0.29683	0.416733	0.973555
	6	125	1	5	0.224328	0.29348	0.275167	0.306692	0.449559	0.0239211
	6	125	1	6	0.224328	0.294007	0.277729	0.306553	0.455179	0.999943
	6	126	1	1	0.224328	0.275629	0.239106	0.0963096	0.0826767	0.00386005
	6	126	1	2	0.224328	0.279019	0.267644	0.296305	0.187647	0.00148207
	6	126	1	3	0.224328	0.279615	0.271088	0.296996	0.192837	0.000588714
	6	126	1	4	0.224328	0.280212	0.2754	0.30003	0.200375	0.000252987
	6	126	1	5	0.224328	0.280852	0.280304	0.303482	0.209163	1
	0.2	127	1	1	0.224328	0.0552247	0.0553872	0.00609271	0.00974418	0.000750097
	1	129	1	1	0.224328	0.127515	0.103892	0.0222272	0.0204719	3.16147e-06
	1	129	1	2	0.224328	0.127805	0.106922	0.129059	0.0513921	0.00192095
	1	129	1	3	0.224328	0.128313	0.111881	0.132967	0.0573173	2.12562e-05
	1	129	1	4	0.224328	0.129151	0.121876	0.140572	0.0704868	0.00188384
	1	129	1	5	0.224328	0.129899	0.131033	0.14712	0.0838268	0.000484171
	1	129	1	6	0.224328	0.130065	0.13256	0.147825	0.0860213	9.55721e-05
	1	129	1	7	0.224328	0.130364	0.136078	0.150411	0.0915767	0.000197774
	1	129	1	8	0.224328	0.130788	0.141467	0.154275	0.10046	0.000450506
	1	129	1	9	0.224328	0.131102	0.145342	0.15689	0.107057	0.000581853
	1	129	1	10	0.224328	0.131222	0.146312	0.157439	0.108657	0.00358389
	1	129	1	11	0.224328	0.131706	0.152615	0.162024	0.120098	0.000127321
	1	129	1	12	0.224328	0.13288	0.171618	0.175196	0.158284	0.905345
	1	129	1	13	0.224328	0.134489	0.115293	0.138352	0.288378	2.29602e-05
	1	129	1	14	0.224328	0.13512	0.123192	0.143594	0.324227	0.000106368
	1	129	1	15	0.224328	0.135284	0.124767	0.144457	0.331147	0.935408
	1	130	1	1	0.224328	0.126968	0.0979168	0.0212581	0.0176493	0.013703
	1	130	1	2	0.224328	0.127415	0.101434	0.124981	0.0452201	0.00615071
	1	130	1	3	0.224328	0.127602	0.102466	0.125654	0.0462644	0.000447268
	1	130	1	4	0.224328	0.128491	0.112068	0.133409	0.0575062	0.0259853
	1	130	1	5	0.224328	0.128733	0.113296	0.133965	0.0588606	0.00110014
	1	130	1	6	0.224328	0.129104	0.117041	0.136849	0.0636439	0.000706296
	1	130	1	7	0.224328	0.129331	0.119072	0.138272	0.0662726	0.00266079
	1	130	1	8	0.224328	0.130052	0.127453	0.144706	0.0780989	0.000744785
	1	130	1	9	0.224328	0.130741	0.136234	0.150938	0.0915826	0.999991
	1	130	1	10	0.224328	0.133933	0.107455	0.133399	0.255612	0.999937
	1	131	1	1	0.224328	0.126969	0.0979353	0.0212611	0.0176576	0.00221234
	1	131	1	2	0.224328	0.127554	0.103448	0.126606	0.0474579	0.00330398
	1	131	1	3	0.224328	0.127787	0.105099	0.127686	0.0492202	0.0034599
	1	131	1	4	0.224328	0.127996	0.106466	0.128745	0.0507314	0.00271589
	1	131	1	5	0.224328	0.12818	0.107642	0.129652	0.0520473	0.098656
	1	131	1	6	0.224328	0.130718	0.138033	0.153447	0.0950508	0.0140691
	1	131	1	7	0.224328	0.131214	0.143879	0.156099	0.104341	0.00174945
	1	131	1	8	0.224328	0.131424	0.145855	0.157286	0.107633	0.0363637
	1	131	1	9	0.224328	0.131735	0.148874	0.15947	0.112907	0.999999
	1	132	1	1	0.224328	0.126873	0.0969233	0.021096	0.0172052	0.000437882
	1	132	1	2	0.224328	0.127366	0.101555	0.125082	0.0453845	4.3708e-05
	1	132	1	3	0.224328	0.128627	0.115851	0.136406	0.0624736	0.00376995
	1	132	1	4	0.224328	0.129036	0.119932	0.138885	0.0677126	0.00084118
	1	132	1	5	0.224328	0.129558	0.125883	0.143299	0.0760562	0.000399118
	1	132	1	6	0.224328	0.130073	0.132106	0.147759	0.0853536	0.000919518
	1	132	1	7	0.224328	0.130475	0.13693	0.1511	0.0929302	8.72899e-05
	1	132	1	8	0.224328	0.130579	0.137823	0.151534	0.0942833	2.57757e-05
	1	132	1	9	0.224328	0.130665	0.138541	0.152036	0.0954229	0.00705997
	1	132	1	10	0.224328	0.131041	0.142834	0.155251	0.102619	0.00712219
	1	132	1	11	0.224328	0.131317	0.145747	0.157218	0.107564	0.00843193
	1	132	1	12	0.224328	0.132419	0.161904	0.168777	0.138034	0.00636813
	1	132	1	13	0.224328	0.132874	0.16783	0.172251	0.14977	0.999838
	1	132	1	14	0.224328	0.135356	0.113132	0.13764	0.276732	0.944167
	10	133	1	1	0.224328	0.340195	0.313366	0.152733	0.140798	0.000418211
	10	133	1	2	0.224328	0.342733	0.33079	0.35994	0.246155	5.56165e-05
	10	133	1	3	0.224328	0.345027	0.347319	0.371208	0.277372	0.00152231
	10	133	1	4	0.224328	0.3466	0.357955	0.378082	0.298011	0.0432784
	10	133	1	5	0.224328	0.349038	0.374245	0.389814	0.331188	0.0039058
	10	133	1	6	0.224328	0.351587	0.39291	0.402523	0.370592	0.999999
	10	133	1	7	0.224328	0.365296	0.334828	0.377627	0.473993	0.999898
	10	134	1	1	0.224328	0.339157	0.305827	0.149357	0.131498	0.000206339
	10	134	1	2	0.224328	0.339557	0.307517	0.342358	0.204551	0.000472392
	10	134	1	3	0.224328	0.340063	0.309794	0.344092	0.208254	0.000496757
	10	134	1	4	0.224328	0.340656	0.312502	0.346125	0.212702	6.34071e-06
	10	134	1	5	0.224328	0.343047	0.329187	0.358928	0.242637	0.0020018
	10	134	1	6	0.224328	0.349353	0.377621	0.394562	0.339509	0.998678
	10	134	1	7	0.224328	0.360479	0.378798	0.402496	0.593436	0.999997
	10	135	1	1	0.224328	0.34329	0.336667	0.163254	0.172184	0.00104754
	10	135	1	2	0.224328	0.349231	0.382898	0.397595	0.351529	0.0148031
	10	135	1	3	0.224328	0.35099	0.395021	0.403102	0.376002	0.999678
	10	135	1	4	0.224328	0.35843	0.340371	0.37484	0.496207	0.999999
	10	136	1	1	0.224328	0.339047	0.30504	0.149006	0.130551	0.0244034
	10	136	1	2	0.224328	0.343128	0.332777	0.362338	0.250082	0.00335372
	10	136	1	3	0.224328	0.345895	0.352438	0.375086	0.287327	0.0111006
	10	136	1	4	0.224328	0.34812	0.367644	0.385182	0.317553	0.000522821
	10	136	1	5	0.224328	0.349577	0.378107	0.391805	0.33893	0.00201682
	10	136	1	6	0.224328	0.350179	0.381356	0.393515	0.345296	0.00592892
	10	136	1	7	0.224328	0.351685	0.39234	0.401526	0.368839	0.0240953
	10	136	1	8	0.224328	0.352415	0.395575	0.403311	0.375176	1
	3	137	1	1	0.224328	0.201079	0.169426	0.0518002	0.0456013	0.0224905
	3	137	1	2	0.224328	0.20177	0.172882	0.202656	0.0938803	0.000219641
	3	137	1	3	0.224328	0.202083	0.175179	0.204136	0.0968757	7.23689e-05
	3	137	1	4	0.224328	0.205615	0.212874	0.233058	0.156874	1
	3	138	1	1	0.224328	0.201218	0.17078	0.0521341	0.0465631	0.000199412
	3	138	1	2	0.224328	0.201907	0.176291	0.20508	0.0986571	2.57076e-05
	3	138	1	3	0.224328	0.203599	0.193274	0.217978	0.123854	4.24538e-05
	3	138	1	4	0.224328	0.206082	0.2211	0.237915	0.171855	0.999761
	3	138	1	5	0.224328	0.211479	0.200594	0.228258	0.412651	0.98056
	3	138	1	6	0.224328	0.213353	0.18301	0.214559	0.34023	0.99989
	3	139	1	1	0.224328	0.201528	0.173835	0.0528868	0.048781	0.00988877
	3	139	1	2	0.224328	0.202145	0.178139	0.206403	0.101178	0.0549331
	3	139	1	3	0.224328	0.20267	0.18024	0.207987	0.103904	0.00244253
	3	139	1	4	0.224328	0.20332	0.185508	0.211922	0.111463	0.0772123
	3	139	1	5	0.224328	0.203729	0.187245	0.213104	0.113817	0.00130205
	3	139	1	6	0.224328	0.204011	0.188991	0.214316	0.11633	0.00124692
	3	139	1	7	0.224328	0.204415	0.192021	0.216599	0.120893	0.00472674
	3	139	1	8	0.224328	0.204913	0.195912	0.219471	0.126893	0.608831
	3	139	1	9	0.224328	0.206133	0.17417	0.205424	0.325823	0.000313678
	3	139	1	10	0.224328	0.208654	0.200665	0.225379	0.417863	1
	3	140	1	1	0.224328	0.20173	0.175848	0.0533826	0.0502798	0.00284595
	3	140	1	2	0.224328	0.20679	0.230623	0.246174	0.190871	0.0825287
	3	140	1	3	0.224328	0.207623	0.23795	0.248234	0.203987	0.00184575
	3	140	1	4	0.224328	0.207976	0.24111	0.250049	0.210152	0.00160748
	3	140	1	5	0.224328	0.208657	0.248466	0.255207	0.225417	0.000116646
	3	140	1	6	0.224328	0.210344	0.270701	0.270508	0.27462	0.999998
	5	141	1	1	0.224328	0.255604	0.222881	0.083551	0.0740311	0.00116605
	5	141	1	2	0.224328	0.256957	0.232244	0.263477	0.14465	0.000527114
	5	141	1	3	0.224328	0.257275	0.233623	0.263872	0.146468	0.00123818
	5	141	1	4	0.224328	0.259293	0.249131	0.276015	0.171855	0.0047919
	5	141	1	5	0.224328	0.25972	0.250891	0.276314	0.174296	0.0204484
	5	141	1	6	0.224328	0.262613	0.274681	0.294509	0.217631	0.999946
	5	141	1	7	0.224328	0.273625	0.282155	0.308881	0.524306	0.999889
	5	142	1	1	0.224328	0.256684	0.231532	0.0863485	0.0820278	0.00989784
	5	142	1	2	0.224328	0.258358	0.243439	0.271679	0.162519	0.0530045
	5	142	1	3	0.224328	0.262819	0.280587	0.29944	0.229917	1
	2	143	1	1	0.224328	0.177236	0.146839	0.0405724	0.0356691	0.002782
	2	143	1	2	0.224328	0.177903	0.152266	0.179668	0.0805649	0.0146424
	2	143	1	3	0.224328	0.178237	0.153965	0.180779	0.0826268	0.685295
	2	143	1	4	0.224328	0.178971	0.144856	0.174796	0.284569	0.0566892
	2	143	1	5	0.224328	0.180362	0.156011	0.183639	0.32615	2.47481e-05
	2	143	1	6	0.224328	0.183344	0.188547	0.208061	0.448661	0.0110488
	2	143	1	7	0.224328	0.187694	0.245432	0.247343	0.635709	0.999857
	6	144	1	1	0.224328	0.27552	0.263878	0.103592	0.109633	6.85748e-05
	6	144	1	2	0.224328	0.277161	0.277685	0.301061	0.208045	0.000120238
	6	144	1	3	0.224328	0.281811	0.322959	0.333738	0.299359	1
	6	145	1	1	0.224328	0.272782	0.239969	0.095362	0.0845635	0.00195811
	6	145	1	2	0.224328	0.273459	0.243992	0.276862	0.15069	0.00148089
	6	145	1	3	0.224328	0.274439	0.251069	0.282139	0.161797	0.0139349
	6	145	1	4	0.224328	0.274889	0.252503	0.282924	0.163766	0.000221387
	6	145	1	5	0.224328	0.275953	0.260365	0.288908	0.176742	0.00307598
	6	145	1	6	0.224328	0.276325	0.261802	0.289553	0.178836	2.28329e-05
	6	145	1	7	0.224328	0.276636	0.263754	0.290913	0.182066	0.00501142
	6	145	1	8	0.224328	0.277017	0.265233	0.292069	0.184421	0.000504452
	6	145	1	9	0.224328	0.279348	0.285857	0.307615	0.222075	1
	6	146	1	1	0.224328	0.272917	0.241106	0.0957521	0.0856604	0.00541745
	6	146	1	2	0.224328	0.273726	0.246291	0.278582	0.1543	0.975886
	6	146	1	3	0.224328	0.277047	0.250062	0.283867	0.410879	7.23112e-05
	6	146	1	4	0.224328	0.27741	0.252227	0.283592	0.415894	0.00100388
	6	146	1	5	0.224328	0.277824	0.254423	0.285237	0.42198	0.000114781
	6	146	1	6	0.224328	0.278065	0.255534	0.285954	0.424937	0.001068
	6	146	1	7	0.224328	0.282645	0.297896	0.318078	0.544208	0.00207744
	6	146	1	8	0.224328	0.283146	0.30109	0.317615	0.550916	1
	0.5	147	1	1	0.224328	0.0804772	0.057545	0.00921109	0.00736191	0.00838214
	0.5	147	1	2	0.224328	0.0822318	0.0701547	0.0865187	0.0323901	0.000465433
	0.5	147	1	3	0.224328	0.0823713	0.0707295	0.0859509	0.0327742	0.000114861
	0.5	147	1	4	0.224328	0.0825694	0.0720353	0.0870254	0.0341853	0.00320402
	0.5	147	1	5	0.224328	0.0830548	0.0756032	0.0900021	0.0382556	0.000153775
	0.5	147	1	6	0.224328	0.0831717	0.0762549	0.0902734	0.0389485	0.147264
	0.5	147	1	7	0.224328	0.0837576	0.0800691	0.09355	0.0435982	0.00123515
	0.5	147	1	8	0.224328	0.0839225	0.0809993	0.0939875	0.0446727	0.255158
	0.5	147	1	9	0.224328	0.0843876	0.0838365	0.0963782	0.0483278	0.00575562
	0.5	147	1	10	0.224328	0.0845634	0.0847878	0.0969127	0.0495028	0.999061
	0.5	147	1	11	0.224328	0.0864005	0.0661616	0.0849706	0.196116	0.999982
	0.5	147	1	12	0.224328	0.0888604	0.0651356	0.0853628	0.182286	0.00122566
	0.5	147	1	13	0.224328	0.0889985	0.0657682	0.0845189	0.184367	0.000249417
	0.5	148	1	1	0.224328	0.0830721	0.0787386	0.0117001	0.0156603	0.000169614
	0.5	148	1	2	0.224328	0.0833737	0.0811788	0.0939927	0.0453185	0.000143064
	0.5	148	1	3	0.224328	0.0836031	0.0829329	0.0952688	0.0475828	0.000631563
	0.5	148	1	4	0.224328	0.0839233	0.0855777	0.097307	0.051163	0.00117738
	0.5	148	1	5	0.224328	0.0840968	0.0867119	0.0980598	0.0526768	0.00593919
	0.5	148	1	6	0.224328	0.0853596	0.100141	0.10849	0.0738008	0.00784042
	0.5	148	1	7	0.224328	0.0857646	0.104027	0.110563	0.0802456	0.000124919
	0.5	148	1	8	0.224328	0.0859664	0.106072	0.111826	0.0838257	0.0011199
	0.5	148	1	9	0.224328	0.0863243	0.109847	0.114546	0.090814	0.00253907
	0.5	148	1	10	0.224328	0.0868333	0.115677	0.118616	0.102181	0.00363971
	0.5	148	1	11	0.224328	0.0872561	0.120539	0.121799	0.112081	0.999925
	0.5	149	1	1	0.224328	0.0808977	0.0605428	0.00957303	0.00831218	0.00308109
	0.5	149	1	2	0.224328	0.0837984	0.0850914	0.0987749	0.0510293	0.00137174
	0.5	149	1	3	0.224328	0.0841716	0.0883906	0.09939	0.0551907	0.000209959
	0.5	149	1	4	0.224328	0.0846952	0.0935002	0.1032	0.0628726	0.00306912
	0.5	149	1	5	0.224328	0.0849422	0.0954528	0.104414	0.0658245	0.034353
	0.5	149	1	6	0.224328	0.0854622	0.100231	0.108024	0.0736598	0.999999
	2	150	1	1	0.224328	0.17998	0.163608	0.0445367	0.0468903	0.999223
	2	150	1	2	0.224328	0.182644	0.152474	0.182726	0.307099	0.0130476
	2	150	1	3	0.224328	0.185731	0.184733	0.20648	0.427418	0.0248909
	2	150	1	4	0.224328	0.186317	0.190328	0.208762	0.446422	9.54774e-06
	2	150	1	5	0.224328	0.188225	0.214649	0.226302	0.532111	0.999987
	2	151	1	1	0.224328	0.179324	0.156803	0.043045	0.0419902	0.000803064
	2	151	1	2	0.224328	0.179848	0.161126	0.186487	0.0917359	0.00938865
	2	151	1	3	0.224328	0.180935	0.171213	0.194195	0.106377	0.149839
	2	151	1	4	0.224328	0.184977	0.217576	0.228413	0.189589	0.00029116
	2	151	1	5	0.224328	0.187665	0.25533	0.252175	0.272563	0.999994
	2	152	1	1	0.224328	0.178352	0.147181	0.0409277	0.0356443	5.02514e-05
	2	152	1	2	0.224328	0.179218	0.155044	0.182221	0.0835705	0.000144524
	2	152	1	3	0.224328	0.17945	0.156688	0.183063	0.0856119	0.000833413
	2	152	1	4	0.224328	0.179856	0.159741	0.185452	0.0897044	0.000152964
	2	152	1	5	0.224328	0.180594	0.166587	0.190672	0.0993824	0.0020456
	2	152	1	6	0.224328	0.180839	0.167913	0.191356	0.101142	0.00028435
	2	152	1	7	0.224328	0.181759	0.177192	0.198454	0.115361	0.0252714
	2	152	1	8	0.224328	0.182958	0.188924	0.206949	0.134608	0.999399
	2	152	1	9	0.224328	0.186618	0.165774	0.194168	0.349379	0.19046
	2	152	1	10	0.224328	0.187937	0.177937	0.20153	0.392997	0.999803
	2	152	1	11	0.224328	0.190575	0.15586	0.187882	0.299354	8.62497e-05
	2	152	1	12	0.224328	0.191382	0.163994	0.192811	0.328048	5.30794e-05
	2	152	1	13	0.224328	0.191918	0.169565	0.196727	0.348203	0.00385685
	2	153	1	1	0.224328	0.178559	0.149182	0.041369	0.0369093	0.000261728
	2	153	1	2	0.224328	0.178975	0.152621	0.180144	0.0803423	0.000341131
	2	153	1	3	0.224328	0.179477	0.156944	0.183422	0.085995	4.53626e-05
	2	153	1	4	0.224328	0.179919	0.160773	0.186215	0.0911584	0.00273748
	2	153	1	5	0.224328	0.181748	0.179538	0.200636	0.119481	0.000627431
	2	153	1	6	0.224328	0.182026	0.181734	0.201183	0.122646	0.00874022
	2	153	1	7	0.224328	0.182788	0.188891	0.206565	0.134611	0.000111884
	2	153	1	8	0.224328	0.184755	0.212929	0.223844	0.179458	0.999989
	2	153	1	9	0.224328	0.190331	0.169077	0.19904	0.354442	0.00260918
	2	153	1	10	0.224328	0.190664	0.17164	0.197581	0.361381	0.000289425
	2	153	1	11	0.224328	0.191036	0.175018	0.200067	0.373677	0.98876
	1	154	1	1	0.224328	0.128939	0.124827	0.0254978	0.0326175	0.0005224
	1	154	1	2	0.224328	0.129099	0.126159	0.14307	0.0767634	1
	1	155	1	1	0.224328	0.127688	0.109181	0.0230211	0.0232484	3.52031e-05
	1	155	1	2	0.224328	0.127885	0.11099	0.131974	0.0563856	0.000340421
	1	155	1	3	0.224328	0.128502	0.117867	0.137368	0.0652163	0.000114759
	1	155	1	4	0.224328	0.128608	0.118607	0.137595	0.0660928	7.03095e-05
	1	155	1	5	0.224328	0.128935	0.122138	0.140334	0.0709339	0.000265898
	1	155	1	6	0.224328	0.130196	0.138937	0.15294	0.0968097	0.00104139
	1	155	1	7	0.224328	0.130349	0.139739	0.152756	0.0978021	8.67225e-05
	1	155	1	8	0.224328	0.131638	0.159169	0.16683	0.133443	1.82604e-05
	1	155	1	9	0.224328	0.1322	0.168102	0.17221	0.151316	9.55967e-05
	1	155	1	10	0.224328	0.133108	0.18378	0.182658	0.185851	0.00011853
	1	155	1	11	0.224328	0.133371	0.187847	0.184758	0.19497	0.000630604
	1	155	1	12	0.224328	0.133496	0.189044	0.185436	0.197626	0.0110293
	1	156	1	1	0.224328	0.127747	0.109875	0.0231319	0.0236219	0.0585428
	1	156	1	2	0.224328	0.129136	0.125095	0.143177	0.0753492	0.197328
	1	156	1	3	0.224328	0.130905	0.148061	0.159655	0.112656	8.38502e-05
	1	156	1	4	0.224328	0.133852	0.199814	0.194478	0.22529	0.0148155
	1	156	1	5	0.224328	0.134184	0.203835	0.194864	0.233935	0.48698
	1	156	1	6	0.224328	0.134587	0.206483	0.196698	0.240146	0.00271658
	5	157	1	1	0.224328	0.25876	0.23797	0.0889647	0.0878241	0.000254988
	5	157	1	2	0.224328	0.259354	0.241746	0.27023	0.158501	7.27466e-05
	5	157	1	3	0.224328	0.260626	0.251543	0.277618	0.174828	0.000146031
	5	157	1	4	0.224328	0.261399	0.256315	0.28072	0.182741	0.00392929
	5	157	1	5	0.224328	0.262328	0.262763	0.285382	0.194008	0.000463835
	5	157	1	6	0.224328	0.263533	0.272693	0.292455	0.212224	0.00467615
	5	157	1	7	0.224328	0.264035	0.275597	0.294056	0.21733	0.00171359
	5	157	1	8	0.224328	0.264694	0.279991	0.297232	0.225586	0.0218441
	5	157	1	9	0.224328	0.265247	0.282514	0.29899	0.230138	0.0377557
	5	157	1	10	0.224328	0.266347	0.289871	0.304469	0.244449	0.0303788
	5	157	1	11	0.224328	0.267626	0.299539	0.311218	0.263827	0.0026795
	5	157	1	12	0.224328	0.268132	0.302668	0.312868	0.269861	0.00426007
	5	157	1	13	0.224328	0.268947	0.308759	0.317228	0.282504	0.999971
	5	157	1	14	0.224328	0.274844	0.238182	0.276667	0.382266	0.0372762
	5	157	1	15	0.224328	0.275651	0.240789	0.275562	0.387326	0.00036379
	5	157	1	16	0.224328	0.275981	0.242427	0.276491	0.391707	0.00129828
	5	157	1	17	0.224328	0.276374	0.244403	0.278001	0.397215	0.999813
	5	158	1	1	0.224328	0.256407	0.218898	0.0827698	0.0701056	6.24364e-05
	5	158	1	2	0.224328	0.258005	0.2308	0.263031	0.141514	0.0023472
	5	158	1	3	0.224328	0.259217	0.238472	0.268384	0.153155	0.000528227
	5	158	1	4	0.224328	0.26034	0.246609	0.274156	0.166228	0.00184666
	5	158	1	5	0.224328	0.260694	0.247866	0.274628	0.167976	0.00214976
	5	158	1	6	0.224328	0.261392	0.252455	0.278133	0.175651	0.0220906
	5	158	1	7	0.224328	0.262275	0.257395	0.281824	0.183936	0.141676
	5	158	1	8	0.224328	0.263105	0.260652	0.284229	0.189217	0.0151054
	5	158	1	9	0.224328	0.265359	0.279007	0.297907	0.22326	0.160021
	5	158	1	10	0.224328	0.266647	0.287942	0.30348	0.240076	0.0107217
	5	158	1	11	0.224328	0.267196	0.290717	0.304966	0.245104	0.999964
	5	158	1	12	0.224328	0.2735	0.240973	0.278355	0.39434	0.998032
	5	158	1	13	0.224328	0.276471	0.24128	0.277521	0.384926	0.360123
	5	158	1	14	0.224328	0.277527	0.243352	0.278111	0.386809	0.0142434
	5	158	1	15	0.224328	0.278093	0.246114	0.279869	0.394228	0.996708
	5	159	1	1	0.224328	0.259283	0.242391	0.0904047	0.092311	0.000878404
	5	159	1	2	0.224328	0.259804	0.245283	0.272699	0.164243	0.00731744
	5	159	1	3	0.224328	0.271901	0.364747	0.361185	0.415917	0.00407575
	5	159	1	4	0.224328	0.27251	0.369087	0.355769	0.421572	0.999996
	5	160	1	1	0.224328	0.260511	0.253043	0.0938825	0.103727	0.00409012
	5	160	1	2	0.224328	0.261901	0.263602	0.286069	0.19615	0.0167155
	5	160	1	3	0.224328	0.262779	0.269089	0.289627	0.205795	1
	5	160	1	4	0.224328	0.27715	0.246504	0.288561	0.412345	0.999371
	3	161	1	1	0.224328	0.200734	0.165352	0.0508178	0.0427666	0.000409788
	3	161	1	2	0.224328	0.201419	0.170978	0.201194	0.0914459	4.17677e-05
	3	161	1	3	0.224328	0.202206	0.178033	0.206458	0.101008	2.60741e-05
	3	161	1	4	0.224328	0.202909	0.184456	0.211085	0.110154	0.00166158
	3	161	1	5	0.224328	0.204566	0.200018	0.222857	0.134375	1.66448e-05
	3	161	1	6	0.224328	0.205984	0.2158	0.233689	0.161494	0.000351234
	3	161	1	7	0.224328	0.206326	0.218691	0.234982	0.16639	7.73462e-05
	3	161	1	8	0.224328	0.207128	0.227747	0.241477	0.183463	5.30104e-06
	3	161	1	9	0.224328	0.209186	0.254168	0.259994	0.237909	0.799403
	3	161	1	10	0.224328	0.211092	0.272512	0.272102	0.277919	0.999996
	3	162	1	1	0.224328	0.201144	0.169288	0.0517895	0.0454836	0.00050603
	3	162	1	2	0.224328	0.204732	0.205233	0.227691	0.143782	5.79971e-05
	3	162	1	3	0.224328	0.205023	0.207695	0.227234	0.14719	1
	3	162	1	4	0.224328	0.214602	0.187536	0.223076	0.36307	0.000122568
	3	162	1	5	0.224328	0.214732	0.188033	0.217451	0.360791	9.95763e-08
	3	162	1	6	0.224328	0.215027	0.191309	0.219915	0.372064	1.80693e-05
	3	162	1	7	0.224328	0.215452	0.195589	0.223078	0.38667	0.00309932
	3	162	1	8	0.224328	0.216439	0.204655	0.22994	0.41738	1.45123e-06
	3	163	1	1	0.224328	0.200591	0.164002	0.0504843	0.0418599	2.21205e-05
	3	163	1	2	0.224328	0.201644	0.173496	0.203265	0.0948867	0.00015794
	3	163	1	3	0.224328	0.201822	0.174487	0.203478	0.0960406	0.000438548
	3	163	1	4	0.224328	0.20205	0.175601	0.204365	0.0974916	1.90097e-05
	3	163	1	5	0.224328	0.202627	0.18079	0.208384	0.104767	0.000571819
	3	163	1	6	0.224328	0.203682	0.190584	0.215773	0.119283	0.000469089
	3	163	1	7	0.224328	0.204746	0.201308	0.223396	0.136316	0.0227284
	3	163	1	8	0.224328	0.205196	0.203804	0.224826	0.140135	0.999963
	3	163	1	9	0.224328	0.209425	0.176291	0.209935	0.328986	2.60032e-05
	3	163	1	10	0.224328	0.21147	0.198092	0.224364	0.403105	8.33264e-06
	3	163	1	11	0.224328	0.211789	0.201113	0.225409	0.41261	0.000552494
	3	163	1	12	0.224328	0.212388	0.206961	0.229731	0.432438	7.11643e-06
	3	163	1	13	0.224328	0.212755	0.210723	0.232222	0.444938	8.29619e-05
	3	163	1	14	0.224328	0.212931	0.211989	0.233002	0.448977	0.0111811
	3	163	1	15	0.224328	0.214226	0.225614	0.243194	0.49407	0.999309
	3	164	1	1	0.224328	0.20169	0.174658	0.0531135	0.0493689	0.00131462
	3	164	1	2	0.224328	0.204658	0.204806	0.226963	0.142952	0.91817
	3	164	1	3	0.224328	0.207636	0.190429	0.218348	0.383174	0.204492
	3	164	1	4	0.224328	0.208307	0.173977	0.205716	0.319056	1
	3	164	1	5	0.224328	0.216319	0.181013	0.218034	0.333411	0.00201147
	0.3	165	1	1	0.224328	0.0594302	0.0547142	0.00651526	0.00879346	1.01137e-05
	0.3	165	1	2	0.224328	0.0595485	0.0552255	0.0659126	0.0271172	8.77563e-05
	0.3	165	1	3	0.224328	0.0604486	0.0596199	0.0699941	0.0321856	1.74347e-05
	0.3	165	1	4	0.224328	0.0631106	0.0766585	0.0843144	0.0566085	1.53237e-05
	0.3	165	1	5	0.224328	0.0638511	0.0820445	0.0866202	0.0651358	0.000214034
	0.3	165	1	6	0.224328	0.0641638	0.0840367	0.0877024	0.068462	0.000244392
	0.3	165	1	7	0.224328	0.0650874	0.0912798	0.0932726	0.0822593	4.26228e-05
	0.5	166	1	1	0.224328	0.0811968	0.0649174	0.0100586	0.00985994	3.74389e-05
	0.5	166	1	2	0.224328	0.0816607	0.0682241	0.0840327	0.0303657	0.002209
	0.5	166	1	3	0.224328	0.0819296	0.0699611	0.0853021	0.0321434	0.00457162
	0.5	166	1	4	0.224328	0.0833475	0.0820973	0.0954098	0.0467994	1.72584e-05
	0.5	166	1	5	0.224328	0.0834221	0.0824984	0.0947849	0.0470764	9.39722e-05
	0.5	166	1	6	0.224328	0.0835565	0.0834061	0.0955158	0.0482703	0.000572705
	0.5	166	1	7	0.224328	0.0836882	0.0841866	0.0961119	0.0492876	0.000360004
	0.5	166	1	8	0.224328	0.0838613	0.0854088	0.0970613	0.0509365	0.900274
	0.5	166	1	9	0.224328	0.0847445	0.062958	0.0813293	0.181236	1.21023e-05
	0.5	166	1	10	0.224328	0.0849285	0.0642631	0.0819915	0.188205	0.763089
	0.5	166	1	11	0.224328	0.0855479	0.0627706	0.0812951	0.17683	0.00305859
	0.5	166	1	12	0.224328	0.0856783	0.0632145	0.0813988	0.178864	0.00628714
	0.5	166	1	13	0.224328	0.0868466	0.072319	0.0894149	0.232004	0.0190508
	0.5	166	1	14	0.224328	0.0873283	0.0758668	0.0917863	0.252623	0.00701191
	0.5	166	1	15	0.224328	0.0879082	0.0809098	0.0957401	0.283321	0.00239058
	0.5	166	1	16	0.224328	0.0882375	0.0835705	0.0976038	0.299306	0.950975
	0.5	167	1	1	0.224328	0.0800292	0.0563969	0.00903828	0.0070412	8.75866e-05
	0.5	167	1	2	0.224328	0.0803475	0.0583473	0.0758909	0.0210956	1.56787e-06
	0.5	167	1	3	0.224328	0.0814622	0.0665563	0.0831163	0.0287328	0.00200366
	0.5	167	1	4	0.224328	0.0815929	0.0670546	0.0829203	0.029095	3.29368e-06
	0.5	167	1	5	0.224328	0.0817618	0.0682045	0.0838682	0.0302618	0.0127515
	0.5	167	1	6	0.224328	0.082117	0.0703934	0.0857468	0.0325485	0.00642093
	0.5	167	1	7	0.224328	0.0824808	0.072932	0.0877585	0.0353133	0.000837229
	0.5	167	1	8	0.224328	0.0826472	0.0740719	0.0885246	0.0365651	0.00112063
	0.5	167	1	9	0.224328	0.083345	0.0799619	0.0933902	0.0437495	0.00579607
	0.5	167	1	10	0.224328	0.0835286	0.081062	0.0938902	0.0450317	0.00781574
	0.5	167	1	11	0.224328	0.0844208	0.0892333	0.100446	0.056383	0.0238318
	0.5	167	1	12	0.224328	0.0848648	0.092897	0.102804	0.0617115	0.0079631
	0.5	167	1	13	0.224328	0.0850042	0.0936017	0.103116	0.0626659	0.987388
	0.5	167	1	14	0.224328	0.0860269	0.063141	0.0819856	0.17803	1.35446e-05
	0.5	167	1	15	0.224328	0.0863386	0.0654244	0.0834501	0.190393	0.00043245
	0.5	167	1	16	0.224328	0.086894	0.069641	0.0870238	0.214714	0.000202836
	0.5	167	1	17	0.224328	0.0872859	0.0728331	0.0894645	0.233392	0.165522
	0.5	167	1	18	0.224328	0.0878317	0.0763976	0.0924036	0.254462	0.00370913
	0.5	167	1	19	0.224328	0.0882492	0.0797755	0.0949414	0.27472	7.1189e-05
	0.5	167	1	20	0.224328	0.0885456	0.0824967	0.0969335	0.291231	0.000461496
	0.5	168	1	1	0.224328	0.0804527	0.0593483	0.00939511	0.00795312	0.000926644
	0.5	168	1	2	0.224328	0.0809281	0.0624151	0.0793607	0.0246814	3.32217e-06
	0.5	168	1	3	0.224328	0.0811329	0.0637867	0.0803223	0.0259252	0.0569031
	0.5	168	1	4	0.224328	0.0813531	0.0643759	0.0808597	0.0264266	0.000218948
	0.5	168	1	5	0.224328	0.0818094	0.0675465	0.0835726	0.0295578	0.00170247
	0.5	168	1	6	0.224328	0.0824269	0.0721949	0.0873624	0.0345031	0.00065022
	0.5	168	1	7	0.224328	0.0831297	0.078045	0.0919393	0.0413532	0.000126918
	0.5	168	1	8	0.224328	0.0842805	0.0891611	0.100527	0.0564428	0.000117556
	0.5	168	1	9	0.224328	0.0844784	0.0907846	0.101029	0.0586185	0.000623677
	0.5	168	1	10	0.224328	0.0848123	0.0939361	0.103404	0.0634385	5.40462e-06
	0.5	168	1	11	0.224328	0.0851467	0.0974198	0.105881	0.0689987	0.000440118
	0.5	168	1	12	0.224328	0.0853411	0.0991362	0.107	0.0717613	0.0050691
	0.5	168	1	13	0.224328	0.0856303	0.1017	0.10889	0.0760696	0.00799061
	0.5	168	1	14	0.224328	0.0858476	0.103353	0.110014	0.0788422	0.0363832
	0.5	168	1	15	0.224328	0.0862036	0.106656	0.112431	0.0847056	0.00625269
	0.5	168	1	16	0.224328	0.0872443	0.119528	0.121674	0.110089	0.000238529
	0.5	168	1	17	0.224328	0.0874366	0.121592	0.122351	0.114065	2.56968e-05
	0.5	168	1	18	0.224328	0.087558	0.122813	0.123108	0.116595	0.000124358
	0.5	168	1	19	0.224328	0.0882966	0.13352	0.130565	0.140959	0.000304092
	10	169	1	1	0.224328	0.344054	0.326429	0.159825	0.156738	0.0505804
	10	169	1	2	0.224328	0.345904	0.335142	0.363451	0.251422	0.00172994
	10	169	1	3	0.224328	0.346904	0.340492	0.366709	0.26096	0.000260931
	10	169	1	4	0.224328	0.348158	0.348839	0.372657	0.276871	2.36759e-05
	10	169	1	5	0.224328	0.35038	0.366121	0.38505	0.311568	0.000885103
	10	169	1	6	0.224328	0.353216	0.388229	0.400389	0.35787	0.00484964
	10	169	1	7	0.224328	0.356643	0.415745	0.419191	0.417898	0.997586
	10	169	1	8	0.224328	0.361098	0.334006	0.369793	0.470957	0.00114434
	10	169	1	9	0.224328	0.362049	0.34024	0.371978	0.485051	0.99999
	10	169	1	10	0.224328	0.371655	0.344714	0.3837	0.483084	5.80144e-05
	10	169	1	11	0.224328	0.371953	0.346078	0.378876	0.483336	0.00210599
	10	169	1	12	0.224328	0.373206	0.355322	0.385853	0.505989	0.000522518
	10	170	1	1	0.224328	0.343503	0.322238	0.157927	0.151145	0.0416471
	10	170	1	2	0.224328	0.344684	0.326443	0.356985	0.23537	0.000949176
	10	170	1	3	0.224328	0.348173	0.352456	0.376389	0.285027	2.21314e-05
	10	170	1	4	0.224328	0.348493	0.353801	0.375343	0.286685	4.20414e-05
	10	170	1	5	0.224328	0.349365	0.359603	0.379692	0.298231	0.00148676
	10	170	1	6	0.224328	0.349884	0.361784	0.381038	0.302248	0.000775634
	10	170	1	7	0.224328	0.351587	0.374116	0.3902	0.327647	0.0898906
	10	170	1	8	0.224328	0.352252	0.3765	0.391279	0.331878	0.986619
	10	170	1	9	0.224328	0.355624	0.327373	0.362866	0.463289	0.00270802
	10	170	1	10	0.224328	0.356231	0.33027	0.363244	0.469329	0.00754434
	10	170	1	11	0.224328	0.356771	0.332341	0.364734	0.474096	0.00457772
	10	170	1	12	0.224328	0.357809	0.338511	0.369398	0.489214	0.073047
	10	170	1	13	0.224328	0.359756	0.348536	0.377105	0.513189	0.999962
	10	170	1	14	0.224328	0.367556	0.338488	0.377081	0.473154	0.999887
	10	171	1	1	0.224328	0.341746	0.309153	0.152026	0.134512	0.000901666
	10	171	1	2	0.224328	0.342215	0.310822	0.345508	0.20818	0.00032551
	10	171	1	3	0.224328	0.342602	0.312366	0.346603	0.210631	0.000891061
	10	171	1	4	0.224328	0.345058	0.329006	0.359575	0.240287	0.000121834
	10	171	1	5	0.224328	0.345375	0.33022	0.35913	0.241845	0.000147513
	10	171	1	6	0.224328	0.354972	0.408704	0.418253	0.40534	0.00961954
	10	171	1	7	0.224328	0.357131	0.42529	0.424457	0.439553	1
	10	172	1	1	0.224328	0.345512	0.337701	0.164956	0.172429	0.00542371
	10	172	1	2	0.224328	0.347736	0.352618	0.375526	0.285521	0.0121644
	10	172	1	3	0.224328	0.350399	0.371538	0.388758	0.3236	0.999999
	10	172	1	4	0.224328	0.363823	0.335907	0.377636	0.479542	8.82203e-05
	10	172	1	5	0.224328	0.364792	0.342888	0.374677	0.492699	0.00215812
	10	172	1	6	0.224328	0.365476	0.346297	0.376937	0.500629	0.000223783
	10	172	1	7	0.224328	0.367043	0.358672	0.385973	0.530862	0.000551321
	10	172	1	8	0.224328	0.368398	0.369278	0.393074	0.555904	0.999737
	6	173	1	1	0.224328	0.277657	0.245946	0.0992094	0.0888353	4.37593e-06
	6	173	1	2	0.224328	0.280089	0.266805	0.295528	0.184906	0.000829803
	6	173	1	3	0.224328	0.280339	0.267921	0.294964	0.186235	0.000325902
	6	173	1	4	0.224328	0.280786	0.270899	0.297206	0.191343	0.00120006
	6	173	1	5	0.224328	0.284147	0.302395	0.320714	0.251086	1.07471e-05
	6	173	1	6	0.224328	0.284709	0.307234	0.322158	0.259948	0.0177238
	6	173	1	7	0.224328	0.285149	0.309016	0.323376	0.263222	0.0220209
	6	173	1	8	0.224328	0.294739	0.416884	0.400344	0.509065	0.999968
	6	174	1	1	0.224328	0.277618	0.245604	0.0990904	0.088497	0.000197088
	6	174	1	2	0.224328	0.280341	0.269165	0.297358	0.189064	3.11767e-05
	6	174	1	3	0.224328	0.283183	0.295777	0.315769	0.238227	0.128938
	6	174	1	4	0.224328	0.283952	0.299308	0.316959	0.244142	0.931901
	6	174	1	5	0.224328	0.28637	0.258024	0.29195	0.413087	1.22076e-05
	6	174	1	6	0.224328	0.28654	0.258845	0.291158	0.414518	3.99709e-06
	6	174	1	7	0.224328	0.286708	0.259647	0.291751	0.416672	2.94617e-06
	6	174	1	8	0.224328	0.289404	0.285559	0.311373	0.490078	0.000807586
	6	174	1	9	0.224328	0.289679	0.287119	0.310932	0.493319	0.00204071
	6	174	1	10	0.224328	0.290221	0.290756	0.313656	0.503074	9.99283e-05
	6	174	1	11	0.224328	0.290472	0.292345	0.314588	0.507144	0.000126433
	6	174	1	12	0.224328	0.290688	0.293581	0.315444	0.510338	7.79278e-05
	6	174	1	13	0.224328	0.291704	0.303178	0.322505	0.536161	2.38028e-06
	6	174	1	14	0.224328	0.292217	0.307855	0.325358	0.54817	0.000172077
	6	174	1	15	0.224328	0.293603	0.322122	0.335512	0.584852	0.000235761
	6	174	1	16	0.224328	0.294175	0.327211	0.338401	0.597027	1.77739e-06
	6	174	1	17	0.224328	0.29442	0.329192	0.339524	0.601673	3.34723e-05
	6	174	1	18	0.224328	0.294786	0.332216	0.341645	0.60892	0.00358558
	6	175	1	1	0.224328	0.279783	0.265144	0.105903	0.109191	0.000912754
	6	175	1	2	0.224328	0.280234	0.267938	0.295066	0.186408	0.000308292
	6	175	1	3	0.224328	0.280752	0.271486	0.297623	0.192482	0.00141756
	6	175	1	4	0.224328	0.281635	0.278324	0.302642	0.204623	0.00129929
	6	175	1	5	0.224328	0.282119	0.281569	0.304671	0.210304	0.0019343
	6	175	1	6	0.224328	0.285013	0.30904	0.324967	0.264117	0.00312229
	6	175	1	7	0.224328	0.28543	0.311397	0.324976	0.268019	0.00401166
	6	175	1	8	0.224328	0.28639	0.319444	0.330788	0.284645	0.00764394
	6	175	1	9	0.224328	0.288216	0.337152	0.343183	0.322729	0.000110789
	6	175	1	10	0.224328	0.289044	0.345101	0.347778	0.339847	0.000110399
	6	175	1	11	0.224328	0.289412	0.348094	0.349468	0.346251	0.0167281
	6	175	1	12	0.224328	0.292692	0.383137	0.374377	0.427182	0.994978
	6	175	1	13	0.224328	0.295379	0.263054	0.298678	0.40858	0.999935
	6	176	1	1	0.224328	0.278511	0.253516	0.101844	0.0965344	1.02342e-05
	6	176	1	2	0.224328	0.278746	0.254873	0.285757	0.164536	0.00162598
	6	176	1	3	0.224328	0.279235	0.257528	0.287855	0.168749	0.00182972
	6	176	1	4	0.224328	0.280212	0.264862	0.293367	0.18096	0.0127759
	6	176	1	5	0.224328	0.281081	0.27041	0.297262	0.190254	0.00101794
	6	176	1	6	0.224328	0.281432	0.27212	0.298181	0.192979	0.00110717
	6	176	1	7	0.224328	0.28176	0.27364	0.29928	0.195498	0.000313303
	6	176	1	8	0.224328	0.285257	0.307386	0.324407	0.260449	0.0005358
	6	176	1	9	0.224328	0.286429	0.318367	0.330265	0.282276	0.000853367
	6	176	1	10	0.224328	0.286708	0.31974	0.330642	0.284713	0.00140413
	6	176	1	11	0.224328	0.288132	0.333272	0.340454	0.313775	0.000247869
	6	176	1	12	0.224328	0.288363	0.334532	0.340526	0.316002	0.00101804
	6	176	1	13	0.224328	0.288718	0.336609	0.342044	0.32036	0.0023168
	6	176	1	14	0.224328	0.289575	0.343549	0.34704	0.335509	7.91882e-05
	6	176	1	15	0.224328	0.290089	0.34804	0.349798	0.345255	0.999931
	6	176	1	16	0.224328	0.29571	0.265787	0.302459	0.419109	0.995499
	6	176	1	17	0.224328	0.299389	0.274762	0.308518	0.435268	0.0968438
	6	176	1	18	0.224328	0.300085	0.264965	0.300389	0.401927	1.71224e-05
	0.2	177	1	1	0.224328	0.0561922	0.0658253	0.0069437	0.0147189	5.97863e-05
	1	178	1	1	0.224328	0.126802	0.104203	0.0221367	0.0207525	9.04115e-06
	1	178	1	2	0.224328	0.126996	0.105963	0.128012	0.0506586	0.00182569
	1	178	1	3	0.224328	0.127629	0.112235	0.133052	0.0582046	7.70823e-05
	1	178	1	4	0.224328	0.127749	0.113161	0.13343	0.0592676	0.000239472
	1	178	1	5	0.224328	0.128169	0.11772	0.137011	0.0652034	0.00325467
	1	178	1	6	0.224328	0.12913	0.128901	0.145508	0.0811279	0.9451
	1	178	1	7	0.224328	0.129901	0.100562	0.125381	0.231878	0.652797
	1	178	1	8	0.224328	0.13108	0.109262	0.132484	0.270022	0.999994
	1	178	1	9	0.224328	0.134376	0.10748	0.133633	0.254523	0.000674135
	1	178	1	10	0.224328	0.134487	0.108015	0.132108	0.255269	0.955881
	1	179	1	1	0.224328	0.126802	0.104203	0.0221367	0.0207525	0.0185365
	1	179	1	2	0.224328	0.128716	0.126075	0.144054	0.07726	0.000237516
	1	179	1	3	0.224328	0.131599	0.169601	0.174701	0.156223	0.00199085
	1	179	1	4	0.224328	0.131901	0.173658	0.175362	0.163969	0.000765088
	1	179	1	5	0.224328	0.132031	0.174793	0.175994	0.166288	0.000391175
	1	179	1	6	0.224328	0.13278	0.187614	0.184734	0.195585	2.13414e-06
	1	179	1	7	0.224328	0.133436	0.200073	0.19252	0.225714	0.000516064
	1	179	1	8	0.224328	0.133846	0.20707	0.196698	0.243136	0.000517331
	1	179	1	9	0.224328	0.13443	0.217967	0.203584	0.271459	9.2759e-05
	1	180	1	1	0.224328	0.126104	0.0966586	0.0209186	0.0171946	0.000152589
	1	180	1	2	0.224328	0.126234	0.0974636	0.121419	0.0413857	8.72394e-05
	1	180	1	3	0.224328	0.126696	0.101872	0.125064	0.0460634	0.00013218
	1	180	1	4	0.224328	0.126919	0.103733	0.12637	0.0480644	0.000370652
	1	180	1	5	0.224328	0.127115	0.105227	0.127518	0.0497165	5.70844e-05
	1	180	1	6	0.224328	0.127274	0.106467	0.128458	0.0511114	0.000431008
	1	180	1	7	0.224328	0.127428	0.107301	0.129116	0.0520385	5.27317e-05
	1	180	1	8	0.224328	0.128513	0.119977	0.139165	0.0682511	7.52929e-05
	1	180	1	9	0.224328	0.128855	0.123766	0.141445	0.0733874	7.35949e-05
	1	180	1	10	0.224328	0.129011	0.125389	0.142502	0.075663	0.00101798
	1	180	1	11	0.224328	0.129195	0.126868	0.143611	0.0777754	0.00300429
	1	180	1	12	0.224328	0.129669	0.132097	0.147566	0.0856744	4.2259e-05
	1	180	1	13	0.224328	0.130789	0.148061	0.159132	0.112614	6.82578e-05
	1	180	1	14	0.224328	0.131659	0.161363	0.167929	0.137811	0.000213297
	1	180	1	15	0.224328	0.131774	0.162426	0.168087	0.139646	0.000332989
	1	180	1	16	0.224328	0.13226	0.169474	0.173042	0.154202	0.00137755
	1	180	1	17	0.224328	0.132531	0.172977	0.175193	0.161504	1.09034e-06
	1	180	1	18	0.224328	0.132646	0.174527	0.176092	0.16477	1.01397e-05
	1	180	1	19	0.224328	0.133027	0.180778	0.180351	0.17868	0.000107093
	1	180	1	20	0.224328	0.133904	0.196696	0.190886	0.216306	1.00983e-05
	1	180	1	21	0.224328	0.134958	0.217918	0.204218	0.270458	2.38976e-05
	1	181	1	1	0.224328	0.126549	0.101403	0.0216865	0.0193833	0.000409786
	1	181	1	2	0.224328	0.126668	0.102127	0.125034	0.0463272	0.000195631
	1	181	1	3	0.224328	0.12702	0.105434	0.127733	0.0500327	0.00991164
	1	181	1	4	0.224328	0.127398	0.108425	0.130061	0.0534645	0.000117159
	1	181	1	5	0.224328	0.128851	0.125949	0.143703	0.076876	0.000410431
	1	181	1	6	0.224328	0.128969	0.126704	0.143366	0.0776879	0.000186633
	1	181	1	7	0.224328	0.129832	0.138003	0.151886	0.0954554	0.00112465
	1	181	1	8	0.224328	0.130171	0.141936	0.154275	0.101879	0.0039042
	1	181	1	9	0.224328	0.130354	0.143341	0.155169	0.10417	0.401174
	1	181	1	10	0.224328	0.131107	0.15135	0.161147	0.11841	0.000170863
	1	181	1	11	0.224328	0.131215	0.15224	0.1613	0.119829	0.00020987
	1	181	1	12	0.224328	0.131538	0.156632	0.164433	0.128151	0.00240466
	1	181	1	13	0.224328	0.131759	0.158918	0.165919	0.132464	0.00036161
	1	181	1	14	0.224328	0.132636	0.173123	0.175801	0.161889	5.00472e-05
	1	181	1	15	0.224328	0.13314	0.181566	0.180986	0.1804	0.00675439
	1	181	1	16	0.224328	0.133598	0.188096	0.185173	0.195275	0.859603
	1	181	1	17	0.224328	0.134344	0.105618	0.130668	0.242144	0.992753
	10	182	1	1	0.224328	0.339372	0.309649	0.150893	0.136314	0.000315532
	10	182	1	2	0.224328	0.34083	0.318836	0.350847	0.224578	0.000310776
	10	182	1	3	0.224328	0.341315	0.320947	0.351783	0.22791	0.00139181
	10	182	1	4	0.224328	0.34231	0.326626	0.356133	0.238022	3.58286e-05
	10	182	1	5	0.224328	0.343787	0.336792	0.363509	0.256832	1.09533e-05
	10	182	1	6	0.224328	0.344116	0.338486	0.363989	0.259636	2.42684e-05
	10	182	1	7	0.224328	0.345634	0.349198	0.372133	0.280445	0.000512894
	10	182	1	8	0.224328	0.346277	0.35252	0.373923	0.286515	0.00282698
	10	182	1	9	0.224328	0.347633	0.360986	0.380241	0.30332	0.998794
	10	182	1	10	0.224328	0.354164	0.335701	0.369728	0.491643	1
	10	183	1	1	0.224328	0.339802	0.312779	0.152295	0.140217	2.63869e-05
	10	183	1	2	0.224328	0.341485	0.324398	0.354827	0.234664	0.00547085
	10	183	1	3	0.224328	0.342151	0.327021	0.356123	0.238872	0.955172
	10	183	1	4	0.224328	0.344611	0.312207	0.348497	0.443883	0.999912
	10	183	1	5	0.224328	0.352989	0.328726	0.365952	0.477359	0.000277497
	10	183	1	6	0.224328	0.354133	0.336395	0.366781	0.493913	0.00904282
	10	183	1	7	0.224328	0.355504	0.345134	0.37303	0.515148	0.0116695
	10	183	1	8	0.224328	0.358657	0.368783	0.390357	0.571944	0.999499
	10	183	1	9	0.224328	0.363906	0.33478	0.371787	0.468147	0.999918
	10	183	1	10	0.224328	0.370442	0.339886	0.378216	0.469791	0.144894
	10	184	1	1	0.224328	0.338868	0.306008	0.149266	0.131867	0.000163085
	10	184	1	2	0.224328	0.339481	0.308988	0.343425	0.207334	0.0013035
	10	184	1	3	0.224328	0.340744	0.316439	0.349137	0.220092	0.00896508
	10	184	1	4	0.224328	0.344155	0.34001	0.36693	0.263474	0.023594
	10	184	1	5	0.224328	0.347021	0.359647	0.380136	0.301533	0.0571388
	10	184	1	6	0.224328	0.348318	0.366403	0.383876	0.31433	0.998099
	10	184	1	7	0.224328	0.354387	0.33633	0.369923	0.492383	1
	10	185	1	1	0.224328	0.342128	0.330123	0.160106	0.163139	3.89155e-05
	10	185	1	2	0.224328	0.343549	0.340001	0.365442	0.263595	0.999692
	10	185	1	3	0.224328	0.352519	0.341551	0.374469	0.512955	1
	3	186	1	1	0.224328	0.200992	0.170083	0.0519165	0.0461061	8.12093e-05
	3	186	1	2	0.224328	0.201624	0.175519	0.204407	0.0977239	0.0111922
	3	186	1	3	0.224328	0.202548	0.183018	0.210108	0.108254	5.5637e-05
	3	186	1	4	0.224328	0.203177	0.188737	0.214059	0.116644	0.00282734
	3	186	1	5	0.224328	0.203573	0.191356	0.215833	0.120492	0.00141977
	3	186	1	6	0.224328	0.203942	0.193734	0.217559	0.124069	0.00572864
	3	186	1	7	0.224328	0.204517	0.198436	0.221069	0.131489	0.0729966
	3	186	1	8	0.224328	0.205019	0.200426	0.222541	0.134436	0.014483
	3	186	1	9	0.224328	0.205333	0.202067	0.223632	0.136951	0.00939335
	3	186	1	10	0.224328	0.205919	0.207118	0.227389	0.145375	0.00102445
	3	186	1	11	0.224328	0.20628	0.210232	0.229435	0.150607	0.00334485
	3	186	1	12	0.224328	0.207057	0.21796	0.235082	0.164342	0.00339737
	3	186	1	13	0.224328	0.207302	0.219391	0.235751	0.166695	0.00962766
	3	186	1	14	0.224328	0.207898	0.224627	0.239622	0.176338	0.00331357
	3	186	1	15	0.224328	0.208306	0.228538	0.242181	0.183632	0.0131947
	3	186	1	16	0.224328	0.208907	0.233998	0.246059	0.194128	0.999903
	3	186	1	17	0.224328	0.212182	0.17614	0.210189	0.320449	0.982091
	3	186	1	18	0.224328	0.21386	0.181644	0.213662	0.333883	0.999577
	3	187	1	1	0.224328	0.201377	0.173862	0.0528471	0.048843	0.000207215
	3	187	1	2	0.224328	0.202258	0.181818	0.20915	0.106632	5.56732e-05
	3	187	1	3	0.224328	0.202452	0.183018	0.20961	0.108197	5.94576e-05
	3	187	1	4	0.224328	0.202693	0.184751	0.210916	0.110688	2.12664e-05
	3	187	1	5	0.224328	0.203729	0.195124	0.21885	0.12668	0.0139629
	3	187	1	6	0.224328	0.20406	0.196827	0.21966	0.129111	0.00986605
	3	187	1	7	0.224328	0.204458	0.199028	0.221327	0.13251	0.00311971
	3	187	1	8	0.224328	0.204725	0.200609	0.222399	0.134959	0.105312
	3	187	1	9	0.224328	0.206494	0.216897	0.23484	0.163139	0.0160564
	3	187	1	10	0.224328	0.206744	0.218134	0.234719	0.164867	0.00612186
	3	187	1	11	0.224328	0.207111	0.220433	0.236437	0.168931	0.0699202
	3	187	1	12	0.224328	0.207709	0.173187	0.204905	0.317608	0.996751
	3	187	1	13	0.224328	0.211244	0.19233	0.22131	0.381137	0.000372298
	3	187	1	14	0.224328	0.211619	0.195449	0.221554	0.390348	0.0042516
	3	187	1	15	0.224328	0.212067	0.199051	0.224204	0.402464	0.893328
	3	187	1	16	0.224328	0.213114	0.178139	0.210554	0.322549	0.000403404
	3	187	1	17	0.224328	0.213299	0.179009	0.210704	0.324996	0.999864
	3	188	1	1	0.224328	0.201713	0.177224	0.0536742	0.0513642	9.78672e-05
	3	188	1	2	0.224328	0.203655	0.197036	0.220701	0.130138	0.00013857
	3	188	1	3	0.224328	0.204104	0.200951	0.222513	0.136139	1.87084e-05
	3	188	1	4	0.224328	0.204951	0.209734	0.228922	0.151092	0.000152147
	3	188	1	5	0.224328	0.206714	0.230021	0.243443	0.188812	7.18831e-05
	3	188	1	6	0.224328	0.207471	0.238631	0.248553	0.205595	2.1302e-05
	3	188	1	7	0.224328	0.208306	0.248789	0.255377	0.226639	2.97822e-05
	3	188	1	8	0.224328	0.208753	0.254012	0.258563	0.237624	0.00082592
	3	188	1	9	0.224328	0.211159	0.286845	0.281318	0.313012	0.000108746
	3	188	1	10	0.224328	0.211712	0.293989	0.284516	0.329287	0.00474232
	3	188	1	11	0.224328	0.211951	0.295437	0.285261	0.332425	0.000306482
	3	188	1	12	0.224328	0.212497	0.302367	0.289925	0.349219	0.000388741
	3	188	1	13	0.224328	0.212804	0.305783	0.291939	0.357332	0.000359356
	3	188	1	14	0.224328	0.212984	0.307077	0.292701	0.360292	0.999924
	3	189	1	1	0.224328	0.202649	0.186893	0.0560502	0.0590845	0.000579106
	3	189	1	2	0.224328	0.203846	0.198706	0.221405	0.132659	1.27634e-05
	3	189	1	3	0.224328	0.204317	0.203274	0.224155	0.140007	0.000170299
	3	189	1	4	0.224328	0.205291	0.213352	0.231517	0.157481	0.00135247
	3	189	1	5	0.224328	0.205534	0.2146	0.231937	0.159402	5.67694e-05
	3	189	1	6	0.224328	0.205778	0.216519	0.233287	0.162783	0.00225902
	3	189	1	7	0.224328	0.206021	0.217828	0.234233	0.165029	0.00231237
	3	189	1	8	0.224328	0.206297	0.219494	0.235448	0.16795	0.00139128
	3	189	1	9	0.224328	0.20686	0.224928	0.239387	0.178058	0.0761323
	3	189	1	10	0.224328	0.207417	0.228568	0.241953	0.184731	0.00110089
	3	189	1	11	0.224328	0.208502	0.240853	0.25061	0.209167	0.00134964
	3	189	1	12	0.224328	0.209002	0.245729	0.253492	0.218905	0.00186906
	3	189	1	13	0.224328	0.209217	0.247032	0.254201	0.221393	0.00265029
	3	189	1	14	0.224328	0.209666	0.251274	0.25722	0.230261	0.922512
	3	189	1	15	0.224328	0.210687	0.174161	0.20689	0.314331	0.999937
	3	189	1	16	0.224328	0.21415	0.177961	0.212274	0.322328	0.999104
	5	190	1	1	0.224328	0.256729	0.22915	0.085713	0.0796504	0.00411853
	5	190	1	2	0.224328	0.257378	0.232293	0.263221	0.144261	0.999627
	5	190	1	3	0.224328	0.26277	0.235264	0.270133	0.400042	0.000411418
	5	190	1	4	0.224328	0.264671	0.250635	0.2789	0.444015	0.00210882
	5	190	1	5	0.224328	0.26517	0.253253	0.27992	0.450839	0.0490569
	5	190	1	6	0.224328	0.267913	0.274195	0.296079	0.511013	0.0020867
	5	190	1	7	0.224328	0.268676	0.279652	0.29859	0.525178	0.0445892
	5	190	1	8	0.224328	0.270197	0.290635	0.306707	0.554753	0.0540794
	5	190	1	9	0.224328	0.27109	0.295476	0.309713	0.566769	0.999885
	5	190	1	10	0.224328	0.278183	0.262091	0.294714	0.449195	0.00426635
	5	190	1	11	0.224328	0.279309	0.271433	0.297447	0.473383	0.00191759
	2	191	1	1	0.224328	0.178687	0.159188	0.0433299	0.0439009	0.00246556
	2	191	1	2	0.224328	0.179055	0.16132	0.186234	0.0925481	0.00115748
	2	191	1	3	0.224328	0.181759	0.18979	0.208089	0.137692	6.18208e-06
	2	191	1	4	0.224328	0.182123	0.19357	0.209118	0.143747	0.047365
	2	191	1	5	0.224328	0.185792	0.237784	0.241258	0.233606	0.99999
	2	191	1	6	0.224328	0.190336	0.158753	0.191059	0.313411	0.0338808
	2	192	1	1	0.224328	0.177882	0.151111	0.0415628	0.0383619	0.00090801
	2	192	1	2	0.224328	0.178425	0.155342	0.181945	0.0844464	0.000428709
	2	192	1	3	0.224328	0.181281	0.185342	0.205048	0.130179	0.120178
	2	192	1	4	0.224328	0.184983	0.22981	0.23594	0.216412	0.000898713
	2	192	1	5	0.224328	0.18521	0.231556	0.234563	0.218904	0.00110585
	2	192	1	6	0.224328	0.185594	0.235098	0.237048	0.226525	0.000226354
	2	192	1	7	0.224328	0.186407	0.245838	0.244369	0.250737	0.000244867
	2	192	1	8	0.224328	0.187933	0.267964	0.259097	0.303362	0.000619896
	2	192	1	9	0.224328	0.188939	0.282619	0.267964	0.339255	0.000269085
	2	192	1	10	0.224328	0.189201	0.285484	0.26921	0.345968	0.999461
	2	193	1	1	0.224328	0.179909	0.17219	0.046163	0.0538543	3.14995e-05
	2	193	1	2	0.224328	0.180702	0.180394	0.200124	0.121639	2.00944e-05
	2	193	1	3	0.224328	0.181034	0.183664	0.202126	0.126892	0.00101442
	2	193	1	4	0.224328	0.18164	0.18924	0.206243	0.136316	0.000334264
	2	193	1	5	0.224328	0.184357	0.222838	0.230546	0.201377	8.85597e-05
	2	193	1	6	0.224328	0.18524	0.234178	0.236694	0.225081	0.00142678
	2	193	1	7	0.224328	0.185905	0.24206	0.24171	0.242439	0.000197499
	2	193	1	8	0.224328	0.187358	0.262861	0.255691	0.291369	0.000122684
	2	193	1	9	0.224328	0.187996	0.272	0.260872	0.313221	4.47312e-05
	2	193	1	10	0.224328	0.18928	0.291956	0.273917	0.363331	2.25908e-05
	2	193	1	11	0.224328	0.18965	0.297276	0.276515	0.376346	0.986287
	2	194	1	1	0.224328	0.179976	0.172933	0.0463247	0.0544632	0.000130835
	2	194	1	2	0.224328	0.180992	0.183544	0.202489	0.126871	8.56983e-06
	2	194	1	3	0.224328	0.18155	0.189518	0.20636	0.136899	4.28367e-05
	2	194	1	4	0.224328	0.182553	0.200968	0.214558	0.15759	1.31697e-05
	2	194	1	5	0.224328	0.183447	0.211697	0.22176	0.178166	0.000471705
	2	194	1	6	0.224328	0.185854	0.243928	0.244153	0.247586	0.0913129
	2	194	1	7	0.224328	0.18677	0.254262	0.249778	0.270687	0.999995
	6	195	1	1	0.224328	0.276823	0.271281	0.106384	0.118028	2.92165e-05
	6	195	1	2	0.224328	0.280523	0.306342	0.32209	0.26382	0.00071762
	6	195	1	3	0.224328	0.281622	0.31611	0.326951	0.283154	0.00112347
	6	195	1	4	0.224328	0.284104	0.341109	0.344497	0.337653	0.999992
	6	195	1	5	0.224328	0.291853	0.260719	0.299046	0.414901	0.00469273
	6	195	1	6	0.224328	0.292332	0.262962	0.296163	0.418367	0.480175
	6	195	1	7	0.224328	0.294058	0.272512	0.303892	0.444549	0.00890732
	6	195	1	8	0.224328	0.295077	0.280048	0.308773	0.464911	0.960531
	6	196	1	1	0.224328	0.274601	0.251241	0.099453	0.0956486	0.0016099
	6	196	1	2	0.224328	0.275714	0.258395	0.287549	0.173462	0.000228263
	6	196	1	3	0.224328	0.2775	0.273246	0.298391	0.199212	0.000180708
	6	196	1	4	0.224328	0.280041	0.29638	0.314779	0.24289	0.000957117
	6	196	1	5	0.224328	0.280812	0.302342	0.317706	0.25409	0.933399
	6	196	1	6	0.224328	0.282362	0.246984	0.282575	0.387746	1
	6	197	1	1	0.224328	0.274307	0.248686	0.0985729	0.0930126	3.91465e-06
	6	197	1	2	0.224328	0.274596	0.250336	0.281274	0.160281	2.1149e-05
	6	197	1	3	0.224328	0.275858	0.260668	0.289199	0.177412	1.78089e-05
	6	197	1	4	0.224328	0.279455	0.293828	0.313622	0.238521	0.00108037
	6	197	1	5	0.224328	0.280399	0.301454	0.317098	0.252727	0.00914309
	6	197	1	6	0.224328	0.283213	0.328262	0.336357	0.309085	0.999996
	6	197	1	7	0.224328	0.292267	0.264698	0.302697	0.427281	0.999859
	0	200	1	1	0.224328	0.00918687	0.00489573	0.000221726	0.00015735	1.93288e-05
	0.5	201	1	1	0.224328	0.0825597	0.0819804	0.011941	0.0174515	0.00138675
	0.5	201	1	2	0.224328	0.0835551	0.0915433	0.101746	0.0608354	0.000490735
	0.5	201	1	3	0.224328	0.0840913	0.0969034	0.105236	0.0692308	0.000101429
	0.5	201	1	4	0.224328	0.0859627	0.120391	0.12232	0.114318	0.0237334
	0.2	202	1	1	0.224328	0.0533678	0.0495874	0.00547604	0.00766399	1.67374e-05
	5	205	1	1	0.224328	0.258516	0.236914	0.0885726	0.0868192	1.27686e-05
	5	205	1	2	0.224328	0.259887	0.247721	0.274885	0.168657	0.999988
	5	205	1	3	0.224328	0.267344	0.232108	0.270886	0.381989	0.999327
	5	205	1	4	0.224328	0.27211	0.245344	0.279853	0.409255	0.00281126
	5	205	1	5	0.224328	0.273401	0.255579	0.284958	0.437525	0.691061
	5	205	1	6	0.224328	0.275841	0.25223	0.284333	0.419242	0.99989
	5	206	1	1	0.224328	0.258255	0.234739	0.0878654	0.0846815	0.00205783
	5	206	1	2	0.224328	0.258917	0.23878	0.268135	0.153817	0.000672929
	5	206	1	3	0.224328	0.259448	0.241848	0.270292	0.158582	0.000126132
	5	206	1	4	0.224328	0.261588	0.259678	0.283878	0.189165	5.38566e-05
	5	206	1	5	0.224328	0.266581	0.306834	0.317958	0.282452	0.00199306
	5	206	1	6	0.224328	0.267225	0.311756	0.318318	0.29144	0.998625
	5	206	1	7	0.224328	0.272563	0.253534	0.285872	0.434106	0.0074848
	5	206	1	8	0.224328	0.273126	0.256689	0.285134	0.44117	0.00889487
	5	206	1	9	0.224328	0.273884	0.261574	0.288757	0.454968	0.999987
	5	207	1	1	0.224328	0.260549	0.254408	0.0942791	0.105306	0.00190111
	5	207	1	2	0.224328	0.261373	0.260139	0.283247	0.189939	0.0177578
	5	207	1	3	0.224328	0.262008	0.263202	0.285357	0.195096	0.0312044
	5	207	1	4	0.224328	0.263008	0.269368	0.289973	0.206137	0.00203986
	5	207	1	5	0.224328	0.263448	0.271761	0.291319	0.210267	0.000648992
	5	207	1	6	0.224328	0.265876	0.293668	0.307597	0.253502	0.999994
	5	207	1	7	0.224328	0.274735	0.247135	0.284593	0.413465	0.0117365
	5	207	1	8	0.224328	0.275485	0.251709	0.282797	0.423484	0.0148863
	5	207	1	9	0.224328	0.276162	0.255711	0.285658	0.434687	0.224838
	5	207	1	10	0.224328	0.277601	0.263652	0.291914	0.456917	0.00113406
	5	207	1	11	0.224328	0.278497	0.271031	0.296739	0.477535	5.15153e-05
	5	208	1	1	0.224328	0.256952	0.224142	0.0844242	0.0747575	0.000112352
	5	208	1	2	0.224328	0.257263	0.225613	0.258453	0.133583	2.49461e-05
	5	208	1	3	0.224328	0.257822	0.229218	0.261249	0.138917	0.000158311
	5	208	1	4	0.224328	0.260909	0.254425	0.280793	0.180235	0.000303947
	5	208	1	5	0.224328	0.26319	0.273821	0.293765	0.21512	0.00213395
	5	208	1	6	0.224328	0.265211	0.291389	0.305619	0.249275	0.0155365
	5	208	1	7	0.224328	0.265711	0.293411	0.306074	0.252599	0.999995
	5	208	1	8	0.224328	0.274347	0.243026	0.281525	0.401412	0.225349
	5	208	1	9	0.224328	0.275525	0.248822	0.281151	0.414845	3.57733e-05
	5	208	1	10	0.224328	0.279336	0.285747	0.308509	0.520754	0.790383
	10	209	1	1	0.224328	0.344437	0.333116	0.16258	0.166211	0.000574442
	10	209	1	2	0.224328	0.346463	0.347283	0.371539	0.275666	0.00173202
	10	209	1	3	0.224328	0.348057	0.358028	0.378675	0.29652	0.999262
	10	209	1	4	0.224328	0.353098	0.32082	0.358739	0.452527	0.00294189
	10	209	1	5	0.224328	0.353608	0.322705	0.357339	0.455473	0.00321839
	10	209	1	6	0.224328	0.354788	0.330148	0.363004	0.474027	0.00120372
	10	209	1	7	0.224328	0.355737	0.33599	0.366974	0.488212	1
	10	210	1	1	0.224328	0.340862	0.306316	0.150478	0.131306	0.000402612
	10	210	1	2	0.224328	0.341739	0.310868	0.345621	0.208779	0.0127675
	10	210	1	3	0.224328	0.3428	0.31586	0.34937	0.217045	0.000965183
	10	210	1	4	0.224328	0.343209	0.317149	0.349949	0.218924	0.00131384
	10	210	1	5	0.224328	0.347002	0.344614	0.371153	0.270001	1
	10	210	1	6	0.224328	0.368981	0.340566	0.387942	0.490092	0.999004
	10	211	1	1	0.224328	0.342189	0.316071	0.154863	0.143401	0.0114016
	10	211	1	2	0.224328	0.343835	0.325621	0.356439	0.234718	0.000347512
	10	211	1	3	0.224328	0.34756	0.353206	0.376794	0.287357	0.00021757
	10	211	1	4	0.224328	0.348396	0.358501	0.378616	0.296949	0.0247073
	10	211	1	5	0.224328	0.350365	0.371677	0.388386	0.323753	1
	10	211	1	6	0.224328	0.372126	0.351772	0.396194	0.512785	0.353648
	10	212	1	1	0.224328	0.341373	0.310046	0.152152	0.135849	0.00704924
	10	212	1	2	0.224328	0.343383	0.322527	0.354502	0.229287	0.040904
	10	212	1	3	0.224328	0.346213	0.340583	0.367674	0.262327	0.99996
	10	212	1	4	0.224328	0.355203	0.328862	0.367209	0.473821	0.999239
	10	212	1	5	0.224328	0.360755	0.335341	0.371223	0.476289	0.999997
	10	212	1	6	0.224328	0.372205	0.344597	0.384979	0.483521	0.300213
	3	213	1	1	0.224328	0.203188	0.18255	0.0552816	0.0552412	3.27571e-06
	3	213	1	2	0.224328	0.203592	0.186126	0.212288	0.112174	0.00128739
	3	213	1	3	0.224328	0.203829	0.187248	0.213033	0.113714	0.000195053
	3	213	1	4	0.224328	0.204851	0.197236	0.22068	0.129266	0.000446313
	3	213	1	5	0.224328	0.205414	0.202218	0.223926	0.137194	0.0033334
	3	213	1	6	0.224328	0.206455	0.212651	0.231548	0.155038	0.000153842
	3	213	1	7	0.224328	0.207119	0.219506	0.236039	0.167209	3.02336e-05
	3	213	1	8	0.224328	0.209718	0.252423	0.259501	0.23344	0.00288932
	3	213	1	9	0.224328	0.210204	0.257305	0.261248	0.243143	0.00159574
	3	213	1	10	0.224328	0.211605	0.275546	0.273819	0.284264	0.0449244
	3	213	1	11	0.224328	0.212038	0.277681	0.274603	0.288422	0.000410907
	3	213	1	12	0.224328	0.212639	0.285082	0.279522	0.305639	0.0137439
	3	213	1	13	0.224328	0.213058	0.288968	0.281938	0.314524	0.476216
	3	213	1	14	0.224328	0.215464	0.197813	0.22586	0.388053	0.000579082
	3	213	1	15	0.224328	0.216037	0.203585	0.228806	0.406676	0.00189831
	3	213	1	16	0.224328	0.216917	0.212594	0.235364	0.436785	0.0258242
	3	214	1	1	0.224328	0.20168	0.167438	0.0515472	0.0440139	0.000531753
	3	214	1	2	0.224328	0.202013	0.16952	0.200162	0.0890158	7.58937e-06
	3	214	1	3	0.224328	0.202141	0.170254	0.200599	0.0899093	3.10979e-05
	3	214	1	4	0.224328	0.202496	0.173056	0.202827	0.0936027	6.48291e-06
	3	214	1	5	0.224328	0.203928	0.186958	0.213633	0.113402	0.000289172
	3	214	1	6	0.224328	0.207263	0.22439	0.241103	0.177274	0.00296307
	3	214	1	7	0.224328	0.208108	0.233284	0.245454	0.193651	0.000230208
	3	214	1	8	0.224328	0.208534	0.237459	0.248001	0.201734	0.000977615
	3	214	1	9	0.224328	0.2088	0.239335	0.249191	0.20533	0.000408753
	3	214	1	10	0.224328	0.20933	0.244846	0.253087	0.216576	0.00443571
	3	214	1	11	0.224328	0.209783	0.248658	0.255625	0.224311	0.00507851
	3	214	1	12	0.224328	0.210195	0.252563	0.25822	0.232428	0.000551209
	3	214	1	13	0.224328	0.210564	0.256032	0.260516	0.239727	0.00174178
	3	214	1	14	0.224328	0.211143	0.26228	0.264807	0.253299	0.000277056
	3	214	1	15	0.224328	0.211522	0.266203	0.267259	0.261825	0.00143064
	3	214	1	16	0.224328	0.212223	0.27475	0.273073	0.281177	0.00432738
	3	214	1	17	0.224328	0.214266	0.304137	0.292899	0.351371	0.999305
	3	214	1	18	0.224328	0.216597	0.180733	0.214381	0.324775	0.482023
	3	215	1	1	0.224328	0.202733	0.177867	0.0541259	0.0515841	9.15392e-05
	3	215	1	2	0.224328	0.20335	0.183364	0.210442	0.108138	0.000494085
	3	215	1	3	0.224328	0.204314	0.192626	0.217332	0.122066	2.32605e-05
	3	215	1	4	0.224328	0.206873	0.221587	0.238591	0.17198	0.000358581
	3	215	1	5	0.224328	0.208351	0.238903	0.249585	0.205309	3.57593e-05
	3	215	1	6	0.224328	0.208758	0.243265	0.251768	0.213833	0.0020279
	3	215	1	7	0.224328	0.209233	0.247765	0.254853	0.223063	0.999999
	3	215	1	8	0.224328	0.217096	0.187326	0.222674	0.353687	7.29571e-06
	3	216	1	1	0.224328	0.203113	0.181774	0.0550901	0.0546236	6.25615e-05
	3	216	1	2	0.224328	0.203967	0.18987	0.215264	0.117873	0.000232092
	3	216	1	3	0.224328	0.205495	0.20584	0.227004	0.143698	6.50229e-05
	3	216	1	4	0.224328	0.20563	0.206635	0.226661	0.144682	0.00206958
	3	216	1	5	0.224328	0.20656	0.21587	0.233627	0.160922	0.00497657
	3	216	1	6	0.224328	0.206877	0.217914	0.234672	0.164326	0.00312828
	3	216	1	7	0.224328	0.207504	0.22396	0.239058	0.175459	0.0037973
	3	216	1	8	0.224328	0.207766	0.225673	0.24002	0.178467	5.28972e-05
	3	216	1	9	0.224328	0.20798	0.227372	0.241168	0.181604	0.12646
	3	216	1	10	0.224328	0.208886	0.235367	0.247139	0.197073	0.002098
	3	216	1	11	0.224328	0.210533	0.255719	0.261223	0.239471	0.000574092
	3	216	1	12	0.224328	0.210848	0.25854	0.262162	0.245025	0.000360906
	3	216	1	13	0.224328	0.211421	0.265193	0.26673	0.259672	0.999998
	0.5	217	1	1	0.224328	0.0822678	0.0801939	0.0117237	0.0165639	0.000135217
	0.5	217	1	2	0.224328	0.0825729	0.0826894	0.0947403	0.0480081	0.000202219
	0.5	217	1	3	0.224328	0.0851751	0.112127	0.117325	0.0977469	0.000461482
	0.5	217	1	4	0.224328	0.0853662	0.11389	0.116546	0.100375	0.000617088
	0.5	217	1	5	0.224328	0.0856105	0.116552	0.11838	0.105748	0.000417757
	0.5	217	1	6	0.224328	0.0858805	0.119427	0.120326	0.111677	0.00033167
	0.5	217	1	7	0.224328	0.0868034	0.132197	0.129185	0.14054	7.22479e-05
	0.5	217	1	8	0.224328	0.0870376	0.135109	0.130454	0.147105	5.50638e-05
	0.5	218	1	1	0.224328	0.0793928	0.0568287	0.00900782	0.00723439	0.000127928
	0.5	218	1	2	0.224328	0.0795284	0.0573946	0.0747568	0.0205177	0.000241347
	0.5	218	1	3	0.224328	0.0800269	0.0605272	0.0775998	0.0232245	0.000306678
	0.5	218	1	4	0.224328	0.080295	0.0619233	0.0786361	0.0244356	6.80098e-06
	0.5	218	1	5	0.224328	0.0805292	0.0634605	0.079879	0.0258535	0.000143827
	0.5	218	1	6	0.224328	0.0809056	0.06592	0.0819717	0.0282331	0.000489743
	0.5	218	1	7	0.224328	0.081171	0.0676074	0.0832681	0.029905	0.000787985
	0.5	218	1	8	0.224328	0.0823923	0.0775174	0.0916313	0.0412181	0.000186547
	0.5	218	1	9	0.224328	0.0825373	0.0783742	0.0915682	0.0420827	0.00028378
	0.5	218	1	10	0.224328	0.0827127	0.0795172	0.0924703	0.0434939	0.000291773
	0.5	218	1	11	0.224328	0.0831966	0.083713	0.0958307	0.0490393	5.00221e-05
	0.5	218	1	12	0.224328	0.0835321	0.0866647	0.0979126	0.0530902	0.000158428
	0.5	218	1	13	0.224328	0.0839903	0.0909816	0.101149	0.059419	0.000270518
	0.5	218	1	14	0.224328	0.0842165	0.092896	0.102372	0.0622615	0.00225494
	0.5	218	1	15	0.224328	0.0844883	0.0950344	0.103959	0.0655673	0.000660315
	0.5	218	1	16	0.224328	0.0846809	0.0965121	0.10497	0.0678715	0.99998
	0.5	218	1	17	0.224328	0.0875066	0.0666197	0.0863136	0.196592	0.938789
	0.5	219	1	1	0.224328	0.0823093	0.0805936	0.0117687	0.0167651	7.75991e-05
	0.5	219	1	2	0.224328	0.0824089	0.0810664	0.0933934	0.0458086	0.00207822
	0.5	219	1	3	0.224328	0.0826764	0.0829803	0.0949589	0.0483399	0.000261765
	0.5	219	1	4	0.224328	0.0830386	0.0860698	0.0973197	0.0526007	0.00377497
	0.5	219	1	5	0.224328	0.0832007	0.0868635	0.097791	0.0536261	0.00115748
	0.5	219	1	6	0.224328	0.0834895	0.0892191	0.0996166	0.0570352	0.0219715
	0.5	219	1	7	0.224328	0.0842409	0.0962897	0.105053	0.0680669	0.000703733
	0.5	219	1	8	0.224328	0.0844445	0.0979012	0.105801	0.0705278	0.00187264
	0.5	219	1	9	0.224328	0.0845766	0.0986054	0.10627	0.0716129	0.00112535
	0.5	219	1	10	0.224328	0.084865	0.101186	0.108216	0.0759793	0.000247439
	0.5	219	1	11	0.224328	0.0853477	0.106457	0.112019	0.0854029	0.000113425
	0.5	219	1	12	0.224328	0.085444	0.107037	0.112133	0.0862984	0.00255659
	0.5	219	1	13	0.224328	0.0863277	0.11785	0.12006	0.107732	0.000707889
	0.5	219	1	14	0.224328	0.0864673	0.118927	0.120185	0.109618	0.99983
	0.5	220	1	1	0.224328	0.0802746	0.0631575	0.00976208	0.00931123	0.00109782
	0.5	220	1	2	0.224328	0.0808735	0.0673615	0.0831873	0.0298177	0.000208558
	0.5	220	1	3	0.224328	0.0811668	0.0693571	0.0845898	0.0318516	0.9998
	0.5	220	1	4	0.224328	0.0835182	0.0641241	0.0827284	0.195642	5.24504e-05
	0.5	220	1	5	0.224328	0.0836917	0.0651813	0.0822658	0.200432	9.60597e-05
	0.5	220	1	6	0.224328	0.0839602	0.066996	0.0838039	0.211156	0.000379131
	0.5	220	1	7	0.224328	0.0843156	0.0695056	0.0858813	0.22619	0.000542309
	0.5	220	1	8	0.224328	0.0844235	0.0699303	0.0860834	0.228445	0.153282
	0.5	220	1	9	0.224328	0.0848795	0.0727796	0.0885918	0.24577	0.000227184
	0.5	220	1	10	0.224328	0.0853822	0.0770375	0.0919325	0.272163	0.00791338
	0.5	220	1	11	0.224328	0.0856873	0.0790268	0.0933559	0.284185	0.000178348
	0.5	220	1	12	0.224328	0.0872351	0.0950173	0.106043	0.385577	0.00061803
	0.5	220	1	13	0.224328	0.0874932	0.0974324	0.106832	0.399154	0.00827765
	0.5	220	1	14	0.224328	0.0876709	0.0985589	0.107603	0.405675	0.000862901
	0	221	1	1	0.224328	0.00918687	0.00611718	0.000254692	0.000267256	0.000359757
	0	221	1	2	0.224328	0.00918687	0.00710629	0.00961736	0.00205206	3.06366e-05
	0	221	1	3	0.224328	0.00918687	0.00860546	0.0108242	0.00323515	2.05548e-05
	1	222	1	1	0.224328	0.12619	0.0991127	0.0212896	0.0183285	0.000166773
	1	222	1	2	0.224328	0.12631	0.0997195	0.123125	0.0437986	5.42844e-05
	1	222	1	3	0.224328	0.127532	0.113133	0.134039	0.059527	0.000184325
	1	222	1	4	0.224328	0.127846	0.116324	0.135836	0.0634775	0.000147292
	1	222	1	5	0.224328	0.127948	0.116864	0.136118	0.0641178	5.66353e-05
	1	222	1	6	0.224328	0.131064	0.161529	0.169501	0.13962	0.998183
	1	222	1	7	0.224328	0.132871	0.108873	0.133219	0.263442	0.999892
	1	223	1	1	0.224328	0.126061	0.0977558	0.02107	0.0177079	0.000209926
	1	223	1	2	0.224328	0.128195	0.122031	0.141189	0.0716309	0.98573
	1	223	1	3	0.224328	0.129318	0.102101	0.126546	0.24137	0.00160284
	1	223	1	4	0.224328	0.129546	0.103797	0.127342	0.248513	2.94891e-05
	1	223	1	5	0.224328	0.129678	0.104959	0.128187	0.253723	0.000916116
	1	223	1	6	0.224328	0.130283	0.111272	0.133301	0.283069	0.00046589
	1	223	1	7	0.224328	0.130862	0.117836	0.138198	0.313784	0.999696
	1	223	1	8	0.224328	0.132731	0.104758	0.130156	0.244639	0.00082866
	1	223	1	9	0.224328	0.133101	0.10843	0.132086	0.260388	4.4684e-05
	1	223	1	10	0.224328	0.13324	0.109586	0.132841	0.26544	9.55804e-05
	1	223	1	11	0.224328	0.133415	0.111211	0.134109	0.27279	0.000407047
	1	223	1	12	0.224328	0.133682	0.113755	0.136105	0.284381	0.00184921
	1	223	1	13	0.224328	0.133874	0.115205	0.137172	0.290861	3.85152e-05
	1	223	1	14	0.224328	0.134483	0.122851	0.143102	0.326501	6.99194e-05
	1	223	1	15	0.224328	0.134655	0.124494	0.144036	0.333788	0.00294144
	2	224	1	1	0.224328	0.177386	0.146936	0.0406298	0.0356985	3.75265e-06
	2	224	1	2	0.224328	0.181101	0.185832	0.205897	0.131415	0.000595086
	2	224	1	3	0.224328	0.181573	0.190208	0.206766	0.138115	0.0275314
	2	224	1	4	0.224328	0.18456	0.224916	0.232145	0.20578	3.43703e-05
	2	224	1	5	0.224328	0.18697	0.259555	0.254247	0.284085	0.000139418
	2	224	1	6	0.224328	0.188871	0.288853	0.272375	0.356154	0.999731
	2	225	1	1	0.224328	0.177007	0.143365	0.0398446	0.0335064	0.0222637
	2	225	1	2	0.224328	0.177253	0.144246	0.173464	0.0704142	0.00264504
	2	225	1	3	0.224328	0.179931	0.170107	0.19411	0.105719	0.00249013
	2	225	1	4	0.224328	0.180488	0.174812	0.196127	0.112435	0.00109346
	2	225	1	5	0.224328	0.181583	0.186412	0.20468	0.131399	0.000276405
	2	225	1	6	0.224328	0.181751	0.187508	0.204846	0.132987	0.000106309
	2	225	1	7	0.224328	0.182558	0.196399	0.211447	0.148731	0.916199
	2	225	1	8	0.224328	0.183997	0.154588	0.183947	0.310071	0.0295696
	2	225	1	9	0.224328	0.185862	0.172745	0.197569	0.377512	0.0416819
	2	225	1	10	0.224328	0.187149	0.185624	0.20641	0.424467	0.994596
	2	225	1	11	0.224328	0.189149	0.159131	0.189328	0.314629	0.0163569
	2	225	1	12	0.224328	0.18988	0.165061	0.192978	0.335468	0.099542
	2	225	1	13	0.224328	0.190853	0.173217	0.199144	0.365041	0.168668
	2	226	1	1	0.224328	0.176856	0.141957	0.0395345	0.0326663	0.00310964
	2	226	1	2	0.224328	0.177339	0.145528	0.174559	0.0720157	0.000427497
	2	226	1	3	0.224328	0.177958	0.150365	0.178312	0.0779679	5.92319e-06
	2	226	1	4	0.224328	0.178458	0.154811	0.181556	0.0836795	0.000172346
	2	226	1	5	0.224328	0.179094	0.160133	0.185593	0.0908307	2.03663e-05
	2	226	1	6	0.224328	0.180294	0.172335	0.194795	0.108701	9.27517e-05
	2	226	1	7	0.224328	0.181899	0.189879	0.207446	0.137458	0.906082
	2	226	1	8	0.224328	0.183514	0.156442	0.185201	0.3188	0.999818
	2	226	1	9	0.224328	0.187059	0.160195	0.190319	0.326362	0.979092
	2	226	1	10	0.224328	0.188404	0.155966	0.186412	0.303671	0.541002
	2	226	1	11	0.224328	0.189479	0.158814	0.188648	0.31135	0.981459
	2	227	1	1	0.224328	0.17921	0.165317	0.044649	0.0484484	0.128848
	2	227	1	2	0.224328	0.179753	0.167793	0.191064	0.101835	0.0022055
	2	227	1	3	0.224328	0.180024	0.169168	0.19193	0.103719	0.000173267
	2	227	1	4	0.224328	0.182653	0.198866	0.214364	0.153817	1.02174e-06
	2	227	1	5	0.224328	0.182771	0.199865	0.213315	0.154977	2.17122e-05
	2	227	1	6	0.224328	0.184466	0.221125	0.228759	0.197172	5.36382e-05
	2	227	1	7	0.224328	0.185028	0.227925	0.232457	0.211073	0.999967
	2	227	1	8	0.224328	0.189107	0.159412	0.190813	0.318561	0.999519
	6	228	1	1	0.224328	0.275883	0.243382	0.0976844	0.0868717	0.00859409
	6	228	1	2	0.224328	0.276721	0.246182	0.279595	0.151732	0.00662798
	6	228	1	3	0.224328	0.277418	0.248407	0.28125	0.154819	0.0653179
	6	228	1	4	0.224328	0.278722	0.254357	0.286072	0.163885	4.57992e-06
	6	228	1	5	0.224328	0.280516	0.270187	0.297499	0.190581	0.000338901
	6	228	1	6	0.224328	0.281882	0.282002	0.305434	0.211599	0.0037504
	6	228	1	7	0.224328	0.2822	0.28335	0.305748	0.213655	0.0176711
	6	228	1	8	0.224328	0.293751	0.409811	0.397049	0.493988	0.999944
	6	229	1	1	0.224328	0.276122	0.245453	0.0984009	0.0889078	0.00158078
	6	229	1	2	0.224328	0.276519	0.247343	0.280029	0.153721	0.0115815
	6	229	1	3	0.224328	0.27766	0.255322	0.286231	0.166408	0.00012397
	6	229	1	4	0.224328	0.27794	0.256661	0.286682	0.168311	0.00449824
	6	229	1	5	0.224328	0.278594	0.260445	0.28966	0.174452	0.000865201
	6	229	1	6	0.224328	0.280597	0.277458	0.302417	0.204252	2.14407e-05
	6	229	1	7	0.224328	0.282186	0.292189	0.312269	0.231638	0.00209859
	6	229	1	8	0.224328	0.286155	0.331591	0.340363	0.313264	1
	6	230	1	1	0.224328	0.28141	0.294872	0.115667	0.147104	0.00294994
	6	230	1	2	0.224328	0.284706	0.326974	0.336451	0.30437	0.00820236
	6	230	1	3	0.224328	0.285203	0.329923	0.336599	0.309604	0.994846
	6	230	1	4	0.224328	0.288047	0.255227	0.290936	0.401487	0.0218014
	6	230	1	5	0.224328	0.288884	0.259102	0.292581	0.411162	0.0015708
	6	230	1	6	0.224328	0.289893	0.267059	0.298339	0.433435	0.999998
	6	231	1	1	0.224328	0.275326	0.238622	0.0960383	0.0823078	0.0107934
	6	231	1	2	0.224328	0.275703	0.240142	0.27488	0.142689	0.010547
	6	231	1	3	0.224328	0.276684	0.24641	0.279824	0.152163	0.0046927
	6	231	1	4	0.224328	0.277612	0.252747	0.284365	0.161995	0.999486
	6	231	1	5	0.224328	0.281368	0.244277	0.281759	0.384135	0.742213
	6	231	1	6	0.224328	0.282968	0.24734	0.28306	0.387552	1
	200	232	1	1	0.224328	0.763328	0.774922	0.788404	0.777702	1
	200	233	1	1	0.224328	0.763328	0.774922	0.788404	0.777702	1
	200	234	1	1	0.224328	0.763328	0.774922	0.788404	0.777702	1
	200	235	1	1	0.224328	0.763328	0.774922	0.788404	0.777702	1
	200	236	1	1	0.224328	0.76328	0.77487	0.788329	0.777622	1
	200	237	1	1	0.224328	0.76328	0.77487	0.788329	0.777622	1
	200	239	1	1	0.224328	0.76328	0.77487	0.788329	0.777622	1
	2	240	1	1	0.224328	0.177793	0.164838	0.0441601	0.0484877	0.00356096
	2	240	1	2	0.224328	0.178081	0.166176	0.189172	0.100561	0.000760611
	2	240	1	3	0.224328	0.178429	0.168711	0.191073	0.104256	0.0185714
	2	240	1	4	0.224328	0.179811	0.182133	0.201342	0.125572	0.00065201
	2	240	1	5	0.224328	0.182351	0.211936	0.222647	0.180471	0.00202701
	2	240	1	6	0.224328	0.182672	0.214366	0.222738	0.184537	0.999999
	2	241	1	1	0.224328	0.17529	0.140373	0.0388362	0.0320158	0.000111402
	2	241	1	2	0.224328	0.175476	0.141243	0.170646	0.0676418	0.000556666
	2	241	1	3	0.224328	0.176384	0.148497	0.176606	0.0764777	0.000255075
	2	241	1	4	0.224328	0.177766	0.161203	0.18633	0.0934591	0.0231894
	2	241	1	5	0.224328	0.178465	0.166916	0.190087	0.101488	0.0244018
	2	241	1	6	0.224328	0.18007	0.182755	0.202006	0.126469	1
	2	242	1	1	0.224328	0.175344	0.140864	0.0389436	0.0323038	0.00144374
	2	242	1	2	0.224328	0.17574	0.142741	0.171945	0.0693817	0.999866
	2	242	1	3	0.224328	0.178837	0.144979	0.176281	0.288466	0.179473
	2	242	1	4	0.224328	0.179817	0.1506	0.179357	0.307958	0.000562795
	2	242	1	5	0.224328	0.180796	0.159451	0.18595	0.341201	0.000420949
	2	242	1	6	0.224328	0.184117	0.196443	0.213828	0.47983	0.999998
	2	243	1	1	0.224328	0.175533	0.142591	0.0393218	0.0333315	7.2515e-05
	2	243	1	2	0.224328	0.175995	0.146121	0.174499	0.0735403	3.78352e-05
	2	243	1	3	0.224328	0.178533	0.17093	0.194064	0.108124	0.00463762
	2	243	1	4	0.224328	0.178856	0.172589	0.193854	0.110112	1
	2	243	1	5	0.224328	0.186153	0.153047	0.187257	0.306176	0.999979
	0	244	1	1	0.224328	0.00918687	0.00620811	0.000257044	0.000276808	9.46738e-05
	0.3	248	1	1	0.224328	0.0564333	0.0385115	0.00492623	0.00389415	0.000119321
	0.3	248	1	2	0.224328	0.0581808	0.045201	0.0588587	0.0172972	2.74694e-05
	0.3	248	1	3	0.224328	0.0593281	0.0501231	0.0627063	0.021628	4.60368e-06
	0.3	248	1	4	0.224328	0.0636437	0.0756815	0.0852725	0.0547439	3.99141e-05
	0.3	248	1	5	0.224328	0.065402	0.0892756	0.0928707	0.0778392	7.15781e-05
	0.3	250	1	1	0.224328	0.0589752	0.0490565	0.00602222	0.00676239	5.19864e-06
	0.3	250	1	2	0.224328	0.0604459	0.0563319	0.0680026	0.0281148	0.00029121
	0.2	252	1	1	0.224328	0.0541534	0.0530753	0.00580883	0.00893764	9.71191e-06
	3	254	1	1	0.224328	0.202414	0.169657	0.0522467	0.0454319	0.000142034
	3	254	1	2	0.224328	0.207492	0.225078	0.242854	0.17885	1
	3	255	1	1	0.224328	0.203192	0.177423	0.0541704	0.0511037	0.000464921
	3	255	1	2	0.224328	0.203621	0.180605	0.208521	0.103759	0.00964313
	3	255	1	3	0.224328	0.210774	0.26677	0.272296	0.266572	0.00015383
	3	255	1	4	0.224328	0.213417	0.305187	0.293628	0.355711	0.999987
	3	256	1	1	0.224328	0.203273	0.178247	0.0543743	0.0517313	0.0506568
	3	256	1	2	0.224328	0.205332	0.197852	0.22195	0.130103	0.988917
	3	256	1	3	0.224328	0.207048	0.173213	0.205376	0.320706	0.010902
	3	256	1	4	0.224328	0.208426	0.186084	0.214627	0.364764	0.0381758
	3	256	1	5	0.224328	0.209329	0.193717	0.219876	0.390568	1
	3	256	1	6	0.224328	0.217251	0.181089	0.218348	0.331265	0.510817
	0.5	257	1	1	0.224328	0.0860398	0.114296	0.0156094	0.0390874	1.52657e-05
	0.5	258	1	1	0.224328	0.0804739	0.0584951	0.00930942	0.00766894	5.54908e-06
	5	259	1	1	0.224328	0.262188	0.251034	0.094038	0.100666	0.00039088
	5	259	1	2	0.224328	0.270368	0.330319	0.336397	0.332855	0.000198899
	5	259	1	3	0.224328	0.270865	0.334091	0.333552	0.338574	0.000365444
	5	259	1	4	0.224328	0.273037	0.356948	0.349671	0.391386	0.000166975
	5	259	1	5	0.224328	0.273637	0.362406	0.352145	0.403367	0.00384975
	5	259	1	6	0.224328	0.275264	0.379181	0.363769	0.442781	0.00590163
	5	259	1	7	0.224328	0.275684	0.381046	0.364213	0.44633	0.99999
	5	260	1	1	0.224328	0.262415	0.253052	0.0947015	0.10288	0.0725234
	5	260	1	2	0.224328	0.272399	0.350495	0.35103	0.37927	0.000139202
	5	260	1	3	0.224328	0.277438	0.408911	0.385194	0.5141	0.999939
	5	261	1	1	0.224328	0.258634	0.221141	0.0842535	0.0714202	0.00192306
	5	261	1	2	0.224328	0.259046	0.222665	0.257139	0.127745	0.00260535
	5	261	1	3	0.224328	0.261037	0.236784	0.268396	0.148988	0.000112314
	5	261	1	4	0.224328	0.261826	0.242401	0.271687	0.157564	0.000220647
	5	261	1	5	0.224328	0.262156	0.244164	0.272691	0.160218	0.00120442
	5	261	1	6	0.224328	0.263908	0.258195	0.283512	0.184061	0.001965
	5	261	1	7	0.224328	0.264718	0.263882	0.286923	0.193743	0.0309465
	5	261	1	8	0.224328	0.266993	0.244804	0.276092	0.416509	0.00071239
	5	261	1	9	0.224328	0.267814	0.250769	0.279444	0.433216	0.000169742
	5	261	1	10	0.224328	0.268334	0.254477	0.281899	0.443744	0.0105941
	5	261	1	11	0.224328	0.269315	0.261767	0.28735	0.464716	0.021725
	5	261	1	12	0.224328	0.269806	0.264278	0.288862	0.471401	1
	5	262	1	1	0.224328	0.26147	0.244738	0.0919709	0.0939569	5.22994e-06
	5	262	1	2	0.224328	0.261759	0.246558	0.27411	0.164715	0.00749665
	5	262	1	3	0.224328	0.266668	0.289284	0.306778	0.243885	0.000760612
	5	262	1	4	0.224328	0.271266	0.335751	0.337601	0.343342	0.999996
	5	262	1	5	0.224328	0.28018	0.253736	0.290996	0.421325	0.99398
	6	263	1	1	0.224328	0.277521	0.249141	0.100103	0.0922288	0.00146153
	6	263	1	2	0.224328	0.280881	0.278505	0.304081	0.206305	0.0011533
	6	263	1	3	0.224328	0.281235	0.28025	0.303405	0.208607	0.0153472
	6	263	1	4	0.224328	0.282644	0.291287	0.311743	0.229268	0.00371473
	6	263	1	5	0.224328	0.284169	0.30465	0.320946	0.255332	0.551678
	6	263	1	6	0.224328	0.289261	0.352509	0.355389	0.358466	0.999999
	6	264	1	1	0.224328	0.277857	0.252121	0.101139	0.095284	0.00485599
	6	264	1	2	0.224328	0.278523	0.255711	0.286502	0.166249	0.0035513
	6	264	1	3	0.224328	0.280237	0.268882	0.29649	0.188416	0.00254707
	6	264	1	4	0.224328	0.280825	0.272003	0.298032	0.19339	0.00159796
	6	264	1	5	0.224328	0.281908	0.280483	0.304275	0.208554	0.00359511
	6	264	1	6	0.224328	0.282506	0.284044	0.306491	0.214771	0.00299867
	6	264	1	7	0.224328	0.283762	0.294312	0.314006	0.234175	0.00874845
	6	264	1	8	0.224328	0.284675	0.300588	0.318142	0.24604	0.996911
	6	264	1	9	0.224328	0.290606	0.282879	0.312151	0.481086	0.999999
	6	265	1	1	0.224328	0.278335	0.256405	0.10263	0.0997918	0.000181055
	6	265	1	2	0.224328	0.279082	0.26197	0.290904	0.176744	0.000269055
	6	265	1	3	0.224328	0.279826	0.267306	0.294688	0.185694	0.000244424
	6	265	1	4	0.224328	0.280465	0.271968	0.29791	0.193678	0.0034094
	6	265	1	5	0.224328	0.284333	0.308385	0.324942	0.263778	0.999396
	6	265	1	6	0.224328	0.288978	0.26247	0.297245	0.423052	0.000339145
	6	265	1	7	0.224328	0.289344	0.26468	0.296163	0.427609	0.999999
	6	266	1	1	0.224328	0.277187	0.246205	0.0990834	0.0892812	0.000723862
	6	266	1	2	0.224328	0.277952	0.251498	0.283551	0.159567	5.25646e-05
	6	266	1	3	0.224328	0.283478	0.303357	0.322521	0.254479	0.00137741
	6	266	1	4	0.224328	0.284531	0.312351	0.325659	0.271338	0.00213381
	6	266	1	5	0.224328	0.285437	0.318703	0.32992	0.284157	0.000176996
	6	266	1	6	0.224328	0.285857	0.3215	0.331518	0.289715	0.00181689
	6	266	1	7	0.224328	0.288873	0.352703	0.353926	0.35878	1
	1	267	1	1	0.224328	0.125644	0.0959261	0.0207298	0.0169263	0.000603483
	1	267	1	2	0.224328	0.125866	0.0974626	0.121347	0.0415575	4.35952e-05
	1	267	1	3	0.224328	0.125961	0.0979533	0.121671	0.0420289	0.000159916
	1	267	1	4	0.224328	0.12611	0.0986562	0.12228	0.0427287	0.00203035
	1	267	1	5	0.224328	0.126574	0.102576	0.125545	0.0469286	0.00188722
	1	267	1	6	0.224328	0.126816	0.104117	0.126628	0.0485683	0.00572492
	1	267	1	7	0.224328	0.127725	0.113213	0.133964	0.0594668	0.000206244
	1	267	1	8	0.224328	0.128559	0.123031	0.141149	0.0726055	0.000308582
	1	267	1	9	0.224328	0.128675	0.123674	0.141162	0.073345	0.00133598
	1	267	1	10	0.224328	0.129203	0.129565	0.145696	0.0820289	0.000261001
	1	267	1	11	0.224328	0.129312	0.130272	0.145934	0.0829766	3.56141e-05
	1	267	1	12	0.224328	0.129468	0.131867	0.147113	0.0854098	1.15799e-06
	1	267	1	13	0.224328	0.130571	0.147873	0.158907	0.112493	0.000273084
	1	267	1	14	0.224328	0.130824	0.150953	0.160405	0.117833	0.00906987
	1	267	1	15	0.224328	0.131233	0.155831	0.163851	0.126942	0.371226
	1	267	1	16	0.224328	0.133983	0.132113	0.150813	0.373247	0.00177234
	1	267	1	17	0.224328	0.134357	0.136306	0.152196	0.39104	0.514231
	1	268	1	1	0.224328	0.125783	0.0973623	0.0209626	0.0175658	0.000101756
	1	268	1	2	0.224328	0.127545	0.11689	0.137074	0.0646861	0.00301299
	1	268	1	3	0.224328	0.128136	0.123463	0.141126	0.073518	0.000207543
	1	268	1	4	0.224328	0.129375	0.139911	0.153246	0.0992955	0.00113331
	1	268	1	5	0.224328	0.129513	0.140909	0.153182	0.100662	0.000192054
	1	268	1	6	0.224328	0.129645	0.142081	0.154009	0.102613	0.000367864
	1	268	1	7	0.224328	0.130866	0.160386	0.167229	0.136903	0.0120755
	1	268	1	8	0.224328	0.131021	0.161653	0.167299	0.139017	0.00978509
	1	268	1	9	0.224328	0.131179	0.162294	0.167778	0.140153	5.09666e-05
	1	268	1	10	0.224328	0.131288	0.163538	0.168578	0.142615	0.000119706
	1	268	1	11	0.224328	0.133039	0.19486	0.190092	0.21358	1.11286e-05
	1	268	1	12	0.224328	0.133465	0.202797	0.193976	0.232631	4.88281e-05
	1	268	1	13	0.224328	0.134239	0.218089	0.203725	0.272291	0.000375248
	1	268	1	14	0.224328	0.13459	0.224549	0.207322	0.289231	0.0103651
	1	269	1	1	0.224328	0.126751	0.108005	0.0226704	0.0227799	9.90052e-05
	1	269	1	2	0.224328	0.12686	0.108685	0.129886	0.0540563	0.0316136
	1	269	1	3	0.224328	0.128546	0.127232	0.144632	0.0791346	4.79379e-06
	1	269	1	4	0.224328	0.129052	0.133717	0.148442	0.0888663	1.23807e-05
	1	269	1	5	0.224328	0.129287	0.136566	0.150264	0.0933702	2.35169e-05
	1	269	1	6	0.224328	0.129792	0.143479	0.15526	0.105069	1.7783e-05
	1	269	1	7	0.224328	0.131449	0.169756	0.17377	0.156361	7.15499e-05
	1	269	1	8	0.224328	0.131646	0.172449	0.174413	0.161582	0.000165874
	1	269	1	9	0.224328	0.13221	0.181696	0.180691	0.182207	3.6794e-05
	1	269	1	10	0.224328	0.132537	0.187031	0.183926	0.194404	0.99987
	1	270	1	1	0.224328	0.126144	0.101212	0.0215837	0.0193541	6.95101e-05
	1	270	1	2	0.224328	0.126733	0.107243	0.129097	0.0524051	5.80713e-05
	1	270	1	3	0.224328	0.127009	0.109933	0.130945	0.0555635	0.00066732
	1	270	1	4	0.224328	0.12716	0.110562	0.131374	0.056259	1.52152e-05
	1	270	1	5	0.224328	0.127497	0.11415	0.13418	0.0607663	0.000100532
	1	270	1	6	0.224328	0.129527	0.140845	0.154498	0.100982	0.996491
	1	270	1	7	0.224328	0.130605	0.100059	0.125426	0.227932	0.999999
	10	271	1	1	0.224328	0.342258	0.329145	0.159813	0.161641	0.00159371
	10	271	1	2	0.224328	0.345139	0.348859	0.372605	0.280632	0.0131362
	10	271	1	3	0.224328	0.346616	0.356919	0.377369	0.295738	0.000570062
	10	271	1	4	0.224328	0.347337	0.360605	0.379484	0.302661	0.981818
	10	271	1	5	0.224328	0.350443	0.318729	0.35523	0.450327	0.000175221
	10	271	1	6	0.224328	0.352124	0.330794	0.362781	0.47999	6.94691e-05
	10	271	1	7	0.224328	0.353752	0.342354	0.370776	0.50839	0.0022951
	10	271	1	8	0.224328	0.355375	0.352629	0.377932	0.532963	0.000139146
	10	271	1	9	0.224328	0.355846	0.355039	0.37891	0.538173	0.00134566
	10	271	1	10	0.224328	0.35662	0.359141	0.38199	0.547728	1
	10	272	1	1	0.224328	0.339273	0.30703	0.149867	0.132978	0.00345122
	10	272	1	2	0.224328	0.340066	0.310576	0.344782	0.209744	0.000802491
	10	272	1	3	0.224328	0.340813	0.314259	0.347422	0.215842	0.0026224
	10	272	1	4	0.224328	0.343397	0.33165	0.360762	0.247199	0.0284871
	10	272	1	5	0.224328	0.34527	0.341945	0.367599	0.265868	0.899601
	10	272	1	6	0.224328	0.347271	0.345738	0.37083	0.27158	0.00137688
	10	272	1	7	0.224328	0.353752	0.39802	0.409085	0.380899	0.996404
	10	272	1	8	0.224328	0.358616	0.335111	0.369882	0.479318	3.89903e-05
	10	272	1	9	0.224328	0.360119	0.346613	0.375725	0.506509	0.999997
	10	273	1	1	0.224328	0.340261	0.314221	0.153088	0.141905	0.000624667
	10	273	1	2	0.224328	0.34121	0.319894	0.351353	0.226111	0.0378337
	10	273	1	3	0.224328	0.343322	0.330422	0.359647	0.244729	0.000169311
	10	273	1	4	0.224328	0.343778	0.332197	0.359912	0.247387	0.00109185
	10	273	1	5	0.224328	0.347088	0.355521	0.377828	0.292704	0.00293174
	10	273	1	6	0.224328	0.347961	0.360631	0.379827	0.302046	1
	10	273	1	7	0.224328	0.366262	0.339878	0.384188	0.490043	0.999737
	10	274	1	1	0.224328	0.346324	0.361083	0.174418	0.209411	0.411401
	10	274	1	2	0.224328	0.347517	0.364507	0.382317	0.31108	0.0735612
	10	274	1	3	0.224328	0.348663	0.369094	0.385602	0.319813	0.00822802
	10	274	1	4	0.224328	0.349692	0.374622	0.389385	0.330845	0.0103273
	10	274	1	5	0.224328	0.35026	0.376717	0.390614	0.334724	0.0709641
	10	274	1	6	0.224328	0.352317	0.389751	0.400502	0.362248	0.0578919
	10	274	1	7	0.224328	0.353694	0.397264	0.405262	0.377673	0.998237
	10	274	1	8	0.224328	0.358236	0.330042	0.366258	0.466299	0.999999
	6	275	1	1	0.224328	0.279219	0.270634	0.104209	0.111122	0.00457479
	6	275	1	2	0.224328	0.283018	0.306064	0.322923	0.253884	0.999934
	6	275	1	3	0.224328	0.288791	0.257317	0.294435	0.409317	0.366989
	6	275	1	4	0.224328	0.290078	0.26367	0.296331	0.424853	0.000139585
	6	275	1	5	0.224328	0.290404	0.265693	0.29719	0.430062	0.999708
	6	275	1	6	0.224328	0.294745	0.26217	0.298893	0.409136	0.00669775
	6	275	1	7	0.224328	0.29554	0.268006	0.300857	0.424002	0.00107124
	6	275	1	8	0.224328	0.296082	0.272208	0.303678	0.435487	0.0281409
	6	275	1	9	0.224328	0.29686	0.277394	0.307524	0.449625	0.00203406
	6	275	1	10	0.224328	0.297574	0.283113	0.311493	0.465206	0.0262877
	6	275	1	11	0.224328	0.298261	0.287204	0.314399	0.476018	0.00180248
	6	275	1	12	0.224328	0.298553	0.288644	0.315191	0.479598	0.0400555
	6	276	1	1	0.224328	0.276468	0.245741	0.0957721	0.0851672	0.00265989
	6	276	1	2	0.224328	0.277418	0.252597	0.284209	0.157389	0.011364
	6	276	1	3	0.224328	0.278236	0.257415	0.287627	0.164793	0.461367
	6	276	1	4	0.224328	0.28105	0.276925	0.302759	0.197584	0.0038628
	6	276	1	5	0.224328	0.281691	0.281457	0.304542	0.205017	0.0305629
	6	276	1	6	0.224328	0.282302	0.28475	0.306882	0.210719	0.999798
	6	276	1	7	0.224328	0.286817	0.25174	0.289194	0.395555	0.000308445
	6	276	1	8	0.224328	0.288131	0.26263	0.294958	0.425157	0.000313921
	6	276	1	9	0.224328	0.288518	0.265014	0.296101	0.431375	0.999983
	6	276	1	10	0.224328	0.294846	0.259266	0.298219	0.402478	0.999848
	6	277	1	1	0.224328	0.276591	0.246811	0.0961333	0.0861906	3.17947e-05
	6	277	1	2	0.224328	0.277434	0.253284	0.284606	0.158499	0.000282735
	6	277	1	3	0.224328	0.279285	0.268857	0.296214	0.184179	0.000357721
	6	277	1	4	0.224328	0.28234	0.297063	0.31642	0.235759	1.98164e-05
	6	277	1	5	0.224328	0.282631	0.298942	0.315912	0.238562	4.98146e-05
	6	277	1	6	0.224328	0.282878	0.300436	0.31693	0.241348	0.000586597
	6	277	1	7	0.224328	0.283254	0.302507	0.318477	0.245247	1
	6	278	1	1	0.224328	0.27609	0.242468	0.094668	0.0820879	0.000884302
	6	278	1	2	0.224328	0.27754	0.253686	0.285293	0.159203	0.000154563
	6	278	1	3	0.224328	0.277825	0.255042	0.285568	0.161014	0.000244942
	6	278	1	4	0.224328	0.278303	0.258201	0.287958	0.16601	0.00376225
	6	278	1	5	0.224328	0.281088	0.282584	0.306438	0.208286	3.59991e-05
	6	278	1	6	0.224328	0.282557	0.296234	0.314925	0.233423	0.000127661
	6	278	1	7	0.224328	0.282849	0.298092	0.315453	0.236583	0.000693031
	6	278	1	8	0.224328	0.284432	0.313241	0.326537	0.266912	0.00854703
	6	278	1	9	0.224328	0.286013	0.327691	0.336244	0.296736	0.0302254
	6	278	1	10	0.224328	0.287859	0.344503	0.347637	0.332847	0.999997
	6	278	1	11	0.224328	0.296441	0.264966	0.304037	0.418331	0.997296
	6	279	1	1	0.224328	0.279688	0.281998	0.107769	0.124896	0.0988075
	6	279	1	2	0.224328	0.281878	0.300662	0.317976	0.24347	0.00206057
	6	279	1	3	0.224328	0.28583	0.340511	0.345804	0.326973	1
	6	280	1	1	0.224328	0.275568	0.244329	0.0949988	0.0841099	0.000265002
	6	280	1	2	0.224328	0.279807	0.28153	0.306228	0.207917	0.999989
	6	280	1	3	0.224328	0.288097	0.261927	0.298886	0.427472	0.999839
	6	280	1	4	0.224328	0.292615	0.25798	0.295439	0.401548	0.999975
	6	281	1	1	0.224328	0.284723	0.333799	0.125771	0.198759	0.000491607
	6	281	1	2	0.224328	0.289998	0.392698	0.380571	0.447024	0.999997
	6	282	1	1	0.224328	0.275911	0.247296	0.0959982	0.0869454	0.00148221
	6	282	1	2	0.224328	0.278136	0.265594	0.293888	0.179464	0.00605685
	6	282	1	3	0.224328	0.278743	0.269468	0.295622	0.185535	0.139448
	6	282	1	4	0.224328	0.279977	0.276077	0.300793	0.196692	0.0104894
	6	282	1	5	0.224328	0.281478	0.28836	0.309483	0.218848	0.00357325
	6	282	1	6	0.224328	0.283088	0.301951	0.318873	0.244633	0.000744928
	6	282	1	7	0.224328	0.283665	0.306296	0.321175	0.252776	0.000894647
	6	282	1	8	0.224328	0.285558	0.324596	0.334337	0.290517	0.994359
	6	282	1	9	0.224328	0.291085	0.283155	0.312244	0.480346	0.839989
	6	282	1	10	0.224328	0.292275	0.256219	0.292072	0.393473	0.996488
	6	282	1	11	0.224328	0.294835	0.259677	0.296143	0.399653	0.00387266
	5	283	1	1	0.224328	0.260142	0.236795	0.0869611	0.0828178	0.000516215
	5	283	1	2	0.224328	0.26048	0.238209	0.268115	0.147833	3.63837e-05
	5	283	1	3	0.224328	0.261817	0.248995	0.276413	0.165176	0.000430192
	5	283	1	4	0.224328	0.264442	0.271797	0.293151	0.205102	0.00607681
	5	283	1	5	0.224328	0.26529	0.277522	0.295996	0.21505	0.00717866
	5	283	1	6	0.224328	0.266608	0.287914	0.303467	0.234855	1
	5	283	1	7	0.224328	0.27895	0.243227	0.28562	0.395842	0.991703
	5	283	1	8	0.224328	0.281681	0.249928	0.285051	0.399443	0.0129016
	5	284	1	1	0.224328	0.262912	0.261102	0.0947578	0.108093	0.0146922
	5	284	1	2	0.224328	0.263881	0.267481	0.289056	0.196945	0.000167261
	5	284	1	3	0.224328	0.2647	0.273935	0.293444	0.208572	0.00101988
	5	284	1	4	0.224328	0.265606	0.280933	0.298346	0.221568	0.00170369
	5	284	1	5	0.224328	0.266233	0.28532	0.301209	0.229738	0.000890492
	5	284	1	6	0.224328	0.266599	0.287413	0.302511	0.233571	0.00804213
	5	284	1	7	0.224328	0.26831	0.302193	0.313451	0.263322	0.00139715
	5	284	1	8	0.224328	0.268813	0.305557	0.314951	0.269708	1
	5	285	1	1	0.224328	0.258937	0.226827	0.0837808	0.0736981	6.07996e-05
	5	285	1	2	0.224328	0.266513	0.294445	0.31184	0.250451	0.000231254
	5	285	1	3	0.224328	0.266761	0.295797	0.307822	0.250973	0.00781042
	5	285	1	4	0.224328	0.268802	0.314477	0.321594	0.29006	0.000494171
	5	285	1	5	0.224328	0.269452	0.319781	0.324212	0.300845	0.00109596
	5	285	1	6	0.224328	0.270379	0.328133	0.329965	0.318986	0.000860259
	5	285	1	7	0.224328	0.270977	0.332976	0.332977	0.329406	0.000451853
	5	285	1	8	0.224328	0.271841	0.340898	0.338402	0.347065	0.000264146
	5	285	1	9	0.224328	0.272614	0.347963	0.342999	0.362884	0.00106835
	5	285	1	10	0.224328	0.273091	0.351409	0.345101	0.370419	0.999998
	5	286	1	1	0.224328	0.260323	0.238321	0.0874489	0.0842772	0.000204508
	5	286	1	2	0.224328	0.260929	0.242306	0.271183	0.154326	1.52452e-05
	5	286	1	3	0.224328	0.261722	0.248373	0.275619	0.164062	0.000805322
	5	286	1	4	0.224328	0.262056	0.250062	0.276567	0.166621	0.0031717
	5	286	1	5	0.224328	0.26583	0.282979	0.301652	0.226224	0.0234266
	5	286	1	6	0.224328	0.266963	0.291528	0.305783	0.24194	0.999865
	5	286	1	7	0.224328	0.272214	0.240291	0.276778	0.393947	0.999431
	5	286	1	8	0.224328	0.276718	0.247872	0.283022	0.406261	0.999936
	5	287	1	1	0.224328	0.265536	0.300198	0.106796	0.159156	0.253679
	5	287	1	2	0.224328	0.269588	0.259981	0.288252	0.459321	1
	5	288	1	1	0.224328	0.257471	0.227051	0.083263	0.0743839	8.80676e-05
	5	288	1	2	0.224328	0.257815	0.228619	0.260708	0.13452	0.00015703
	5	288	1	3	0.224328	0.258058	0.229428	0.261279	0.135587	0.000139222
	5	288	1	4	0.224328	0.25926	0.238239	0.268237	0.149017	0.000459248
	5	288	1	5	0.224328	0.25954	0.239129	0.268354	0.150083	0.00159744
	5	288	1	6	0.224328	0.260265	0.243603	0.27188	0.157083	0.0141936
	5	288	1	7	0.224328	0.260878	0.246373	0.273872	0.161277	0.999731
	5	288	1	8	0.224328	0.266588	0.2404	0.275161	0.407687	1
	5	289	1	1	0.224328	0.256606	0.220166	0.0810802	0.0684465	5.16094e-05
	5	289	1	2	0.224328	0.256911	0.221281	0.255375	0.123967	0.00129872
	5	289	1	3	0.224328	0.257631	0.225404	0.258695	0.129752	0.00118426
	5	289	1	4	0.224328	0.258732	0.232939	0.264424	0.140793	0.00110449
	5	289	1	5	0.224328	0.25916	0.234778	0.265395	0.143292	0.220486
	5	289	1	6	0.224328	0.260537	0.228907	0.262511	0.380494	1
	5	290	1	1	0.224328	0.259047	0.240069	0.0873994	0.0865228	0.0023643
	5	290	1	2	0.224328	0.260089	0.247049	0.274304	0.163221	0.000798669
	5	290	1	3	0.224328	0.260729	0.251385	0.277147	0.170183	0.00524868
	5	290	1	4	0.224328	0.26212	0.261029	0.284473	0.186591	0.00013528
	5	290	1	5	0.224328	0.26362	0.27363	0.293288	0.209249	0.00021456
	5	290	1	6	0.224328	0.264534	0.280752	0.297828	0.222349	0.000603578
	5	290	1	7	0.224328	0.264854	0.282074	0.298403	0.224526	1
	200	291	1	1	0.224328	0.761655	0.773109	0.781914	0.768824	1
	200	292	1	1	0.224328	0.761655	0.773109	0.781914	0.768824	0.373076
	200	292	1	2	0.224328	0.761719	0.775137	0.779636	0.771873	1
	200	293	1	1	0.224328	0.761655	0.773109	0.781914	0.768824	1
	200	293	1	2	0.224328	0.762686	0.77538	0.780672	0.767762	0.999992
	200	294	1	1	0.224328	0.761655	0.773109	0.781914	0.768824	1
	200	295	1	1	0.224328	0.761729	0.773189	0.782053	0.768984	0.66018
	200	295	1	2	0.224328	0.761799	0.774137	0.779057	0.769407	0.999999
	200	295	1	3	0.224328	0.76238	0.774782	0.779943	0.766463	0.999997
	200	295	1	4	0.224328	0.762917	0.775762	0.780696	0.767815	0.996633
	200	295	1	5	0.224328	0.763097	0.776589	0.781052	0.769162	0.832089
	200	295	1	6	0.224328	0.763175	0.775424	0.78031	0.766099	0.00566233
	200	296	1	1	0.224328	0.761799	0.781766	0.787302	0.7891	1
	200	297	1	1	0.224328	0.762993	0.892918	0.862734	0.964844	5.33824e-06
	200	297	1	2	0.224328	0.763015	0.89417	0.86068	0.96548	0.998325
	200	298	1	1	0.224328	0.761737	0.774137	0.782631	0.771244	0.999998
	200	298	1	2	0.224328	0.762297	0.77476	0.77989	0.766542	1
	1	299	1	1	0.224328	0.129535	0.112638	0.0235695	0.0243406	1.25039e-05
	1	299	1	2	0.224328	0.130077	0.118915	0.138645	0.0647503	7.79461e-05
	1	299	1	3	0.224328	0.130262	0.120725	0.139756	0.0670695	9.93946e-05
	1	299	1	4	0.224328	0.130383	0.121658	0.140411	0.0682838	3.85596e-05
	1	299	1	5	0.224328	0.131207	0.132336	0.148571	0.0837457	0.000301346
	1	299	1	6	0.224328	0.13141	0.134338	0.149586	0.0866449	8.02726e-05
	1	299	1	7	0.224328	0.131546	0.135634	0.15047	0.0886146	0.0156589
	1	299	1	8	0.224328	0.131713	0.136447	0.151106	0.0898035	0.00487675
	1	299	1	9	0.224328	0.132039	0.139573	0.153446	0.0947506	2.96757e-05
	1	299	1	10	0.224328	0.132325	0.143368	0.156064	0.100996	0.0348468
	1	299	1	11	0.224328	0.132582	0.14461	0.156972	0.10292	0.000659439
	1	299	1	12	0.224328	0.133265	0.154442	0.16401	0.120422	0.00230271
	1	299	1	13	0.224328	0.1335	0.156972	0.165419	0.124929	0.000922724
	1	299	1	14	0.224328	0.134214	0.168091	0.173196	0.14684	0.00013893
	1	299	1	15	0.224328	0.134545	0.173027	0.176163	0.156896	0.000357201
	1	299	1	16	0.224328	0.134681	0.174564	0.177037	0.160015	7.00478e-05
	1	299	1	17	0.224328	0.135037	0.180362	0.180979	0.172596	0.000773915
	1	299	1	18	0.224328	0.135446	0.186953	0.185277	0.187322	1.59465e-05
	1	299	1	19	0.224328	0.136074	0.198847	0.192999	0.215385	0.00201531
	1	299	1	20	0.224328	0.136236	0.200687	0.193805	0.219532	0.000599876
	1	299	1	21	0.224328	0.13662	0.207314	0.19815	0.235901	0.946364
	1	300	1	1	0.224328	0.128201	0.0973999	0.0211239	0.0168903	2.22423e-05
	1	300	1	2	0.224328	0.129204	0.108175	0.130916	0.0515564	0.000162676
	1	300	1	3	0.224328	0.12938	0.109675	0.131552	0.053168	3.16832e-05
	1	300	1	4	0.224328	0.131207	0.133041	0.149745	0.0850666	0.0033217
	1	300	1	5	0.224328	0.133139	0.16197	0.169754	0.135854	0.00387439
	1	300	1	6	0.224328	0.136146	0.218876	0.207056	0.26882	0.000183387
	1	300	1	7	0.224328	0.136235	0.219808	0.205131	0.269733	0.00343518
	1	300	1	8	0.224328	0.136397	0.221358	0.206184	0.273655	0.986617
	1	301	1	1	0.224328	0.128998	0.106255	0.0225519	0.0210112	0.00117372
	1	301	1	2	0.224328	0.130285	0.121412	0.140971	0.0681961	0.0559622
	1	301	1	3	0.224328	0.130616	0.123006	0.141579	0.0700686	0.00602158
	1	301	1	4	0.224328	0.130787	0.12381	0.142098	0.0710736	0.00857146
	1	301	1	5	0.224328	0.131399	0.130768	0.14743	0.0810928	0.00137579
	1	301	1	6	0.224328	0.131553	0.132133	0.148111	0.0830098	0.0498789
	1	301	1	7	0.224328	0.131846	0.13449	0.149921	0.0865365	0.000131669
	1	301	1	8	0.224328	0.132662	0.146099	0.158388	0.105621	0.00122217
	1	301	1	9	0.224328	0.132912	0.14902	0.160008	0.110519	0.0167998
	1	301	1	10	0.224328	0.13359	0.158513	0.166779	0.127978	0.00263411
	1	301	1	11	0.224328	0.133758	0.159884	0.167355	0.13036	0.999991
	1	301	1	12	0.224328	0.136574	0.106845	0.133605	0.244252	0.00678286
	1	301	1	13	0.224328	0.136783	0.108408	0.133257	0.249793	0.755466
	1	302	1	1	0.224328	0.128534	0.101011	0.0217087	0.0185026	0.000322994
	1	302	1	2	0.224328	0.12904	0.105986	0.128947	0.0489942	0.000208559
	1	302	1	3	0.224328	0.129346	0.108906	0.131064	0.0522698	0.000274443
	1	302	1	4	0.224328	0.129501	0.110027	0.131837	0.0535287	0.0449078
	1	302	1	5	0.224328	0.129853	0.112161	0.133629	0.0560023	0.00143487
	1	302	1	6	0.224328	0.130324	0.117077	0.13739	0.0620978	0.00237435
	1	302	1	7	0.224328	0.130731	0.121473	0.140601	0.0678315	0.999977
	1	302	1	8	0.224328	0.133256	0.103982	0.130154	0.240444	0.149243
	1	302	1	9	0.224328	0.134574	0.117615	0.13987	0.301614	3.06108e-05
	1	302	1	10	0.224328	0.134742	0.119355	0.14044	0.308982	0.999985
	1	303	1	1	0.224328	0.127877	0.098509	0.0212295	0.0174407	0.000126711
	1	303	1	2	0.224328	0.128143	0.100873	0.124707	0.0436496	0.000148448
	1	303	1	3	0.224328	0.128341	0.10248	0.125929	0.0453194	0.0465182
	1	303	1	4	0.224328	0.129074	0.107737	0.130381	0.0510742	0.000119761
	1	303	1	5	0.224328	0.129621	0.113551	0.134667	0.0579375	0.000110659
	1	303	1	6	0.224328	0.132884	0.160097	0.169454	0.132772	3.75459e-05
	1	303	1	7	0.224328	0.134228	0.183354	0.183251	0.181146	0.000137245
	1	303	1	8	0.224328	0.134346	0.184574	0.183083	0.183366	0.00099637
	1	303	1	9	0.224328	0.13446	0.185708	0.183829	0.18586	0.00182845
	1	303	1	10	0.224328	0.134854	0.191523	0.187793	0.199294	2.62603e-05
	1	303	1	11	0.224328	0.135023	0.194071	0.189239	0.205165	0.000845411
	1	303	1	12	0.224328	0.135409	0.199761	0.193041	0.218795	4.47839e-05
	1	303	1	13	0.224328	0.135502	0.200701	0.19341	0.220883	0.000127975
	1	303	1	14	0.224328	0.135617	0.202065	0.194304	0.224154	0.000453488
	1	303	1	15	0.224328	0.135986	0.208611	0.19861	0.2405	0.000446313
	1	303	1	16	0.224328	0.1367	0.222937	0.207736	0.277639	2.1784e-06
	1	304	1	1	0.224328	0.127944	0.0992258	0.0213454	0.0177601	2.60975e-05
	1	304	1	2	0.224328	0.128273	0.102418	0.125939	0.0452968	0.000363455
	1	304	1	3	0.224328	0.128366	0.102777	0.126094	0.0456262	1.25317e-05
	1	304	1	4	0.224328	0.128476	0.103668	0.1268	0.0465762	9.9307e-05
	1	304	1	5	0.224328	0.128708	0.105455	0.128271	0.04852	1.2471e-05
	1	304	1	6	0.224328	0.130204	0.123467	0.14252	0.0712319	4.23939e-05
	1	304	1	7	0.224328	0.131766	0.145356	0.158068	0.105389	5.41577e-06
	1	304	1	8	0.224328	0.132061	0.149523	0.160017	0.112375	0.00164855
	1	304	1	9	0.224328	0.132473	0.155327	0.164053	0.122978	0.00010704
	1	304	1	10	0.224328	0.133444	0.171131	0.174979	0.154522	0.99985
	1	304	1	11	0.224328	0.135661	0.109639	0.135008	0.258987	7.28302e-06
	1	304	1	12	0.224328	0.135732	0.11007	0.134031	0.259815	1.84218e-05
	1	304	1	13	0.224328	0.136454	0.118994	0.141159	0.300565	5.33611e-05
	1	305	1	1	0.224328	0.128315	0.103323	0.0220048	0.0196565	0.000100833
	1	305	1	2	0.224328	0.12842	0.104008	0.127028	0.0469885	8.7423e-05
	1	305	1	3	0.224328	0.128787	0.107711	0.130033	0.0511488	9.07028e-05
	1	305	1	4	0.224328	0.129997	0.12207	0.141273	0.0693253	5.32941e-05
	1	305	1	5	0.224328	0.130466	0.127877	0.144988	0.0773821	0.0122992
	1	305	1	6	0.224328	0.130979	0.133635	0.149152	0.085956	6.06991e-05
	1	305	1	7	0.224328	0.133135	0.167049	0.173174	0.146541	4.98782e-05
	1	305	1	8	0.224328	0.133228	0.167963	0.172215	0.147705	7.4515e-05
	1	305	1	9	0.224328	0.133344	0.169181	0.173051	0.150162	0.999873
	1	305	1	10	0.224328	0.135104	0.103673	0.13008	0.232519	0.236721
	1	305	1	11	0.224328	0.136196	0.113247	0.137147	0.274296	6.59659e-06
	1	306	1	1	0.224328	0.129231	0.114106	0.023721	0.025242	1.65978e-05
	1	306	1	2	0.224328	0.129399	0.115729	0.135897	0.0608528	8.35117e-05
	1	306	1	3	0.224328	0.130475	0.129283	0.14637	0.0796352	0.000512193
	1	306	1	4	0.224328	0.131126	0.137726	0.152069	0.0925612	0.00013287
	1	306	1	5	0.224328	0.131591	0.143898	0.156243	0.102704	0.000772734
	1	306	1	6	0.224328	0.131786	0.145917	0.157466	0.106046	0.000487347
	1	306	1	7	0.224328	0.132297	0.153055	0.162577	0.118824	3.48127e-05
	1	306	1	8	0.224328	0.132522	0.15602	0.164383	0.12422	3.76464e-06
	1	306	1	9	0.224328	0.132663	0.157875	0.165577	0.127682	0.000205627
	1	306	1	10	0.224328	0.133722	0.175372	0.177832	0.163522	0.000756759
	1	306	1	11	0.224328	0.133916	0.177986	0.178875	0.168825	0.999992
	0	309	1	1	0.224328	0.00918687	0.00491022	0.000220203	0.00015639	1.0823e-05
	0	309	1	2	0.224328	0.00918687	0.00636243	0.00898267	0.00156358	2.02674e-06
[truncated: 264,049+ more rows]
