# Supplementary material for: Accept–reject decision-making revealed via a quantitative and ethological study of C. elegans foraging
Source: eLife. 2025 Sep 10;13:RP103191. doi: 10.7554/eLife.103191 (PMC12422737; doi:10.7554/eLife.103191)
Supplement: Figure 4—source data 3. [file elife-103191-fig4-data3.xlsx]

## Sheet: Sheet1
Figure 4 - Source Data 3
Figure 4F - Observed and predicted (with and without history-dependence) posterior probabilities of exploitation
Coefficient values for nested GLMs
	coefficient	no history	with history		* coefficient values fit by logistic regression across 50,000 replicates as described in methods and Figure 4 - supplement 1
	β_0	-2.28714	-1.30556		* model without history: β_0 + β_k ρ_k + β_s τ_s
	β_k	1.521	2.32683		* model with history: β_0 + β_k ρ_k + β_s τ_s + β_h ρ_h + β_e ρ_e
	β_s	1.03425	2.44675
	β_h		-0.395407
	β_e		-0.859494
Likelihood-Ratio Test for model with and without history
	no history	with history	likelihood-ratio test	p		* log-likelihood = sum(y.*log(p) + (1-y).*log(1-p))
	-119377	-106833	25087.7	0
Summary Statistics for ρ_k vs. ρ_h
	label (10^ρ_k)	label (10^ρ_h)	ρ_k	τ_s	ρ_h	ρ_e	no history	with history	observed		* mean values of ρ_k and ρ_h are given for each of the 9 combinations
	1	1	-0.131256	0.207473	-0.132628	1.17982	0.108644	0.218656	0.1933		* mean values of τ_s and ρ_e are given for all encounters
	1	4	-0.146193	0.207473	0.595687	1.17982	0.0934981	0.111908	0.116975		* predicted posterior probabilities of exploitation are evaluated for these average covariate values
	1	7	-0.162002	0.207473	0.840775	1.17982	0.0986921	0.0802993	0.117289		* observed posterior probabiliteis are averaged for all encounters containing that combination of labels
	4	1	0.608501	0.207473	-0.135704	1.17982	0.257653	0.474812	0.608782
	4	4	0.597622	0.207473	0.59427	1.17982	0.232932	0.358681	0.475135
	4	7	0.576191	0.207473	0.834333	1.17982	0.2246	0.286804	0.341713
	7	1	0.837618	0.207473	-0.169889	1.17982	0.338651	0.565977	0.712044
	7	4	0.849105	0.207473	0.585935	1.17982	0.308441	0.467823	0.508478
	7	7	0.848993	0.207473	0.843445	1.17982	0.296939	0.409977	0.543559
Summary Statistics for ρ_k vs. ρ_e
	label (10^ρ_k)	label (10^ρ_e)	ρ_k	τ_s	ρ_h	ρ_e	no history	with history	observed		* mean values of ρ_k and ρ_e are given for each of the 9 combinations
	1	1	-0.123279	0.207473	0.634095	-0.128694	0.0940027	0.275673	0.224438		* mean values of τ_s and ρ_h are given for all encounters
	1	4	-0.141496	0.207473	0.634095	0.597725	0.0893423	0.137855	0.106503		* predicted posterior probabilities of exploitation are evaluated for these average covariate values
	1	7	-0.13164	0.207473	0.634095	0.867738	0.0883885	0.101541	0.0799313		* observed posterior probabiliteis are averaged for all encounters containing that combination of labels
	4	1	0.588021	0.207473	0.634095	-0.159961	0.217087	0.601729	0.666143
	4	4	0.600019	0.207473	0.634095	0.594175	0.219645	0.400241	0.515867
	4	7	0.580228	0.207473	0.634095	0.83658	0.207888	0.308188	0.381618
	7	1	0.854555	0.207473	0.634095	-0.154563	0.293648	0.752644	0.713356
	7	4	0.869023	0.207473	0.634095	0.60071	0.297991	0.545162	0.541408
	7	7	0.850311	0.207473	0.634095	0.841451	0.286824	0.457017	0.59749
Source Data
	worm #	replicate #	sensed encounter #	label (10^ρ_k)	label (10^ρ_h)	label (10^ρ_e)	ρ_k	τ_s	ρ_h	ρ_e	no history	with history	observed		* observed posterior probability of classification estiamted by the Gaussian Mixture Model described in methods, Figure 2H, and Figure 2 - supplement 6
	1	1	1	4	200	200	0.735792	0.0263965	2.29572	2.29572	0.242191	0.0824278	0.708799		* predicted posterior probabilities of exploitation are evaluated for the models with and without the history terms ρ_h and ρ_e
	1	1	2	4	4	4	0.743607	0.0380665	0.735792	0.735792	0.246615	0.399987	0.00038236
	1	1	3	4	4	4	0.745719	0.0550158	0.743607	0.735792	0.250489	0.410422	0.00607438
	1	1	4	4	4	4	0.751041	0.104752	0.745719	0.735792	0.261832	0.443003	0.999974
	1	1	5	4	4	4	0.774297	0.010466	0.751041	0.751041	0.25	0.396332	0.0330558
	1	1	6	7	4	4	1.02803	0.100677	0.774297	0.751041	0.349923	0.594153	0.000157203
	1	1	7	4	7	4	0.786048	0.124388	1.02803	0.751041	0.276295	0.444179	0.00529771
	1	1	8	7	4	4	1.03689	0.17329	0.786048	0.751041	0.370329	0.639867	0.0625943
	1	1	9	7	7	4	1.04365	0.225342	1.03689	0.751041	0.385401	0.649922	0.030538
	1	1	10	7	7	4	1.04712	0.244978	1.04365	0.751041	0.391478	0.661981	0.0735688
	1	1	11	7	7	4	1.0508	0.26202	1.04712	0.751041	0.397024	0.672832	1
	2	1	1	4	200	200	0.743965	0.114292	2.29572	2.29572	0.261659	0.101951	0.943516
	2	1	2	4	4	4	0.751292	0.0175976	0.743965	0.743965	0.244858	0.389843	0.805547
	2	1	3	7	4	4	1.00471	0.102992	0.751292	0.751292	0.342435	0.584538	1
	2	1	4	7	7	7	1.05617	0.0091693	1.00471	1.00471	0.338223	0.478413	0.999999
	2	1	5	7	7	7	1.10449	0.0828004	1.05617	1.05617	0.372482	0.53534	1
	3	1	1	7	200	200	1.00327	0.326297	2.29572	2.29572	0.395631	0.258523	1
	3	1	2	7	7	7	1.09346	0.00639064	1.00327	1.00327	0.350376	0.498842	1
	4	1	1	4	200	200	0.751334	0.194963	2.29572	2.29572	0.280351	0.123337	0.0806065
	4	1	2	4	4	200	0.757746	0.249238	0.751334	2.29572	0.293834	0.230973	0.00920147
	4	1	3	4	4	200	0.768498	0.357232	0.757746	2.29572	0.321085	0.285751	5.3372e-05
	4	1	4	7	4	200	1.01204	0.373718	0.768498	2.29572	0.41064	0.422297	1
	4	1	5	7	7	7	1.07753	0.0561265	1.01204	1.01204	0.356594	0.51724	0.999804
	4	1	6	7	7	7	1.09469	0.0111141	1.07753	1.07753	0.351915	0.479161	0.869779
	4	1	7	4	7	7	0.850989	0.102435	1.09469	1.09469	0.291761	0.389708	0.999952
	4	1	8	4	4	4	0.868016	0.0132444	0.850989	0.850989	0.278243	0.420351	0.00154827
	4	1	9	7	4	4	1.12888	0.0213021	0.868016	0.850989	0.36631	0.574112	0.00266949
	4	1	10	4	7	4	0.87028	0.0285263	1.12888	0.850989	0.282125	0.404065	0.00390281
	4	1	11	7	4	4	1.13258	0.0485318	0.87028	0.850989	0.374188	0.592179	0.99998
	5	1	1	1	200	200	0.0206434	0	2.29572	2.29572	0.0948552	0.0156976	0.0661989
	5	1	2	7	1	200	0.972297	0.0866009	0.0206434	2.29572	0.327677	0.307334	1
	5	1	3	7	7	7	1.04733	0.0152825	0.972297	0.972297	0.33663	0.487168	0.984798
	5	1	4	7	7	7	1.06021	0.055758	1.04733	1.04733	0.350489	0.495877	1
	6	1	1	7	200	200	0.959098	0	2.29572	2.29572	0.303993	0.124031	1
	6	1	2	7	7	7	1.0738	0.0219509	0.959098	0.959098	0.34724	0.51078	1
	7	1	1	7	200	200	0.967895	0.0751159	2.29572	2.29572	0.323598	0.147979	1
	8	1	1	7	200	200	0.981969	0.198487	2.29572	2.29572	0.357029	0.1953	0.999998
	8	1	2	7	7	7	1.02428	0.0195431	0.981969	0.981969	0.32982	0.473354	1
	8	1	3	7	7	7	1.08101	0.0070391	1.02428	1.02428	0.346231	0.485409	0.999174
	8	1	4	1	7	7	0.101236	0.0568685	1.08101	1.08101	0.111615	0.0921705	0.00752984
	8	1	5	1	1	1	0.103444	0.0319538	0.101236	0.101236	0.109412	0.247178	0.00265
	9	1	1	1	200	200	0.0258393	0.0890996	2.2857	2.2857	0.103801	0.0199229	0.000334618
	9	1	2	1	1	200	0.0296101	0.141059	0.0258393	2.2857	0.109465	0.0538452	0.0342942
	9	1	3	1	1	200	0.0398224	0.290361	0.0296101	2.2857	0.127164	0.0773638	0.167983
	9	1	4	1	1	1	0.0416917	0.00463096	0.0398224	0.0398224	0.0980625	0.223187	0.93407
	9	1	5	1	1	1	0.0468609	0.0225065	0.0416917	0.0416917	0.100418	0.232585	0.999637
	9	1	6	1	1	1	0.0577108	0.0192648	0.0468609	0.0468609	0.101612	0.234523	0.996962
	9	1	7	1	1	1	0.0705711	0.108364	0.0577108	0.0577108	0.112273	0.27916	0.00149556
	9	1	8	1	1	1	0.0735384	0.150599	0.0705711	0.0577108	0.117167	0.300803	0.00423304
	9	1	9	1	1	1	0.0786973	0.231548	0.0735384	0.0577108	0.126976	0.346472	0.026218
	9	1	10	1	1	1	0.0808818	0.256083	0.0786973	0.0577108	0.130191	0.360889	0.999649
	9	1	11	1	1	1	0.0903528	0.00602016	0.0808818	0.0808818	0.104941	0.234676	0.000284917
	9	1	12	1	1	1	0.0914378	0.0189867	0.0903528	0.0808818	0.106364	0.240199	0.00949539
	9	1	13	1	1	1	0.0981451	0.131332	0.0914378	0.0808818	0.11899	0.29702	0.041736
	9	1	14	1	1	1	0.102859	0.203945	0.0981451	0.0808818	0.127888	0.337256	0.0100341
	9	1	15	1	1	1	0.104428	0.219504	0.102859	0.0808818	0.129963	0.346222	1
	10	1	1	1	200	200	0.0254112	0.0823384	2.2857	2.2857	0.103092	0.0195833	0.000248819
	10	1	2	1	1	200	0.03374	0.20404	0.0254112	2.2857	0.116624	0.0628311	0.00633371
	10	1	3	1	1	200	0.0353202	0.218396	0.03374	2.2857	0.118413	0.0649547	0.0229291
	10	1	4	1	1	200	0.0370433	0.232381	0.0353202	2.2857	0.120208	0.0672763	1
	10	1	5	1	1	1	0.083672	0.00750205	0.0370433	0.0370433	0.104133	0.242504	0.00483065
	10	1	6	1	1	1	0.0903528	0.113364	0.083672	0.0370433	0.115836	0.292583	0.00026049
	10	1	7	1	1	1	0.0908881	0.116791	0.0903528	0.0370433	0.116283	0.294032	0.00244567
	10	1	8	1	1	1	0.0926208	0.137723	0.0908881	0.0370433	0.118802	0.305583	0.0344927
	10	1	9	1	1	1	0.0960256	0.185792	0.0926208	0.0370433	0.12467	0.3327	0.000374872
	10	1	10	1	1	1	0.0966735	0.190793	0.0960256	0.0370433	0.125343	0.335458	0.000872319
	10	1	11	1	1	1	0.0982692	0.211817	0.0966735	0.0370433	0.128017	0.347805	0.0239904
	10	1	12	1	1	1	0.108755	0.393256	0.0982692	0.0370433	0.152516	0.459837	0.999999
	11	1	1	1	200	200	0.0231342	0.0464948	2.2857	2.2857	0.0994037	0.0178753	0.00162978
	11	1	2	1	1	200	0.03091	0.152266	0.0231342	2.2857	0.110795	0.0554736	2.97519e-05
	11	1	3	1	1	200	0.0369404	0.2447	0.03091	2.2857	0.121545	0.0692894	0.000143951
	11	1	4	1	1	200	0.0380077	0.255999	0.0369404	2.2857	0.122974	0.0711002	0.000164834
	11	1	5	1	1	200	0.0499554	0.446887	0.0380077	2.2857	0.148177	0.111503	0.000275111
	11	1	6	1	1	200	0.0530224	0.490326	0.0499554	2.2857	0.154547	0.122735	0.00082903
	11	1	7	1	1	200	0.0586631	0.578221	0.0530224	2.2857	0.167997	0.149337	0.000151552
	11	1	8	1	1	200	0.0594072	0.584427	0.0586631	2.2857	0.169055	0.151212	0.00148215
	11	1	9	1	1	200	0.0602258	0.589984	0.0594072	2.2857	0.170039	0.153174	0.993883
	11	1	10	1	1	1	0.0702854	0.070761	0.0602258	0.0602258	0.108413	0.26029	0.000765257
	11	1	11	1	1	1	0.0738325	0.128648	0.0702854	0.0602258	0.114885	0.289349	0.00188126
	11	1	12	1	1	1	0.0813102	0.252285	0.0738325	0.0602258	0.129821	0.358923	0.000897943
	11	1	13	1	1	1	0.0820577	0.257657	0.0813102	0.0602258	0.130579	0.361672	0.00615838
	11	1	14	1	1	1	0.0870914	0.338698	0.0820577	0.0602258	0.141319	0.411344	0.0119878
	11	1	15	1	1	1	0.0908376	0.395658	0.0870914	0.0602258	0.149342	0.447119	0.999882
	11	1	16	1	1	1	0.101739	0.00546446	0.0908376	0.0908376	0.106524	0.236954	0.992125
	11	1	17	1	1	1	0.10711	0.00685373	0.101739	0.101739	0.107442	0.237355	0.105287
	11	1	18	1	1	1	0.108634	0.0137075	0.10711	0.101739	0.108347	0.240664	0.516715
	11	1	19	1	1	1	0.111353	0.0141705	0.108634	0.108634	0.108794	0.240834	0.0289614
	11	1	20	1	1	1	0.112358	0.0206538	0.111353	0.108634	0.109595	0.243979	0.0243747
	11	1	21	1	1	1	0.114266	0.0419559	0.112358	0.108634	0.112052	0.254487	0.999997
	12	1	1	1	200	200	0.0201627	0	2.2857	2.2857	0.0947924	0.0158755	0.00521467
	12	1	2	1	1	200	0.0238474	0.0440867	0.0201627	2.2857	0.0992779	0.042504	0.0020695
	12	1	3	1	1	200	0.0305911	0.135594	0.0238474	2.2857	0.10906	0.0533229	0.0115045
	12	1	4	1	1	200	0.032437	0.153007	0.0305911	2.2857	0.1111	0.0556004	0.00768403
	12	1	5	1	1	200	0.0341025	0.168474	0.032437	2.2857	0.112943	0.0577924	0.045859
	12	1	6	1	1	200	0.0367861	0.191351	0.0341025	2.2857	0.115752	0.0612371	0.0140194
	12	1	7	1	1	200	0.0403443	0.236364	0.0367861	2.2857	0.121178	0.0683411	0.693237
	12	1	8	1	1	200	0.0438174	0.246182	0.0403443	2.2857	0.122832	0.0703216	0.0419664
	12	1	9	1	1	200	0.0503767	0.338152	0.0438174	2.2857	0.134611	0.0876365	0.964822
	12	1	10	1	1	1	0.0559203	0.0236179	0.0503767	0.0503767	0.101775	0.234895	0.00277304
	12	1	11	1	1	1	0.0577108	0.0430679	0.0559203	0.0503767	0.103882	0.24392	0.0778223
	12	1	12	1	1	1	0.060242	0.0642777	0.0577108	0.0503767	0.106307	0.254599	0.0681974
	12	1	13	1	1	1	0.0618368	0.0760403	0.060242	0.0503767	0.107701	0.260621	0.816428
	12	1	14	1	1	1	0.0648803	0.00537191	0.0618368	0.0618368	0.101296	0.228104	0.0409523
	12	1	15	1	1	1	0.0687479	0.0537191	0.0648803	0.0618368	0.106498	0.251061	0.00253309
	12	1	16	1	1	1	0.0703648	0.0713167	0.0687479	0.0618368	0.10848	0.259673	0.0049616
	12	1	17	1	1	1	0.0726498	0.102159	0.0703648	0.0618368	0.111949	0.275373	0.999997
	12	1	18	1	1	1	0.0966685	0.0858568	0.0726498	0.0726498	0.11392	0.276533	7.40751e-05
	12	1	19	1	1	1	0.0985916	0.116143	0.0966685	0.0726498	0.117423	0.290564	0.00490515
	12	1	20	1	1	1	0.0999035	0.12985	0.0985916	0.0726498	0.119109	0.298005	0.00581292
	12	1	21	1	1	1	0.109389	0.298785	0.0999035	0.0726498	0.140428	0.396057	0.99955
	12	1	22	1	1	1	0.11906	0.0303787	0.109389	0.109389	0.111587	0.251341	0.0735933
	12	1	23	1	1	1	0.12067	0.0414928	0.11906	0.109389	0.112977	0.256478	0.388971
	12	1	24	1	1	1	0.124732	0.0886353	0.12067	0.109389	0.1186	0.280861	0.00199916
	12	1	25	1	1	1	0.128177	0.149115	0.124732	0.109389	0.125872	0.31307	0.989473
	13	1	1	4	200	200	0.724574	0.0159309	2.2857	2.2857	0.23711	0.0795154	0.00250564
	13	1	2	4	4	200	0.736967	0.136802	0.724574	2.2857	0.264107	0.18137	0.000386463
	13	1	3	4	4	200	0.738266	0.145693	0.736967	2.2857	0.266284	0.18434	0.275524
	13	1	4	4	4	200	0.741367	0.150973	0.738266	2.2857	0.268277	0.187309	0.08358
	13	1	5	4	4	200	0.749227	0.218031	0.741367	2.2857	0.284536	0.216453	0.0240777
	13	1	6	4	4	200	0.751212	0.226552	0.749227	2.2857	0.286951	0.220269	1
	13	1	7	4	4	4	0.845326	0.0325095	0.751212	0.751212	0.275323	0.449725	1
	14	1	1	4	200	200	0.729295	0.0652054	2.2857	2.2857	0.247788	0.0896919	0.289013
	14	1	2	4	4	200	0.732356	0.068725	0.729295	2.2857	0.249337	0.156269	0.999028
	14	1	3	4	4	4	0.747851	0.0324175	0.732356	0.732356	0.246729	0.400075	0.895016
	14	1	4	4	4	4	0.760945	0.0916951	0.747851	0.747851	0.262133	0.438047	0.332349
	14	1	5	4	4	4	0.763563	0.00481631	0.760945	0.760945	0.245866	0.384142	1
	14	1	6	4	4	4	0.862307	0.00527933	0.763563	0.763563	0.274858	0.439204	0.999985
	14	1	7	4	4	4	0.881859	0.00583504	0.862307	0.862307	0.28094	0.420321	0.0755725
	15	1	1	4	200	200	0.729242	0.0646497	2.2857	2.2857	0.247665	0.0895709	0.00157206
	15	1	2	4	4	200	0.740886	0.179315	0.729242	2.2857	0.273925	0.198484	0.999793
	15	1	3	4	4	4	0.759877	0.0307503	0.740886	0.740886	0.249821	0.403247	0.0102363
	15	1	4	4	4	4	0.763081	0.0554802	0.759877	0.740886	0.255571	0.417876	0.00626423
	15	1	5	4	4	4	0.765094	0.0676136	0.763081	0.740886	0.258552	0.42595	1
	15	1	6	4	4	4	0.810109	0.0371411	0.765094	0.765094	0.265699	0.42805	0.00426658
	15	1	7	4	4	4	0.816962	0.115405	0.810109	0.765094	0.283902	0.474977	0.000376231
	15	1	8	4	4	4	0.81988	0.147173	0.816962	0.765094	0.291545	0.495409	0.508412
	15	1	9	4	4	4	0.823476	0.164215	0.81988	0.765094	0.296338	0.507636	1
	16	1	1	4	200	200	0.734148	0.116425	2.2857	2.2857	0.259208	0.101489	0.000275545
	16	1	2	4	4	200	0.736577	0.131985	0.734148	2.2857	0.263025	0.178936	0.0275102
	16	1	3	4	4	200	0.741461	0.168756	0.736577	2.2857	0.271932	0.194161	0.129518
	16	1	4	4	4	200	0.74402	0.176629	0.741461	2.2857	0.274321	0.19783	0.999975
	16	1	5	4	4	4	0.767598	0.00796543	0.74402	0.74402	0.247612	0.39325	0.926658
	16	1	6	4	4	4	0.773361	0.00750233	0.767598	0.767598	0.249159	0.389128	0.995921
	16	1	7	4	4	4	0.783216	0.0128744	0.773361	0.773361	0.253023	0.396005	1
	17	1	1	7	200	200	0.970784	0.0820606	2.27537	2.27537	0.326137	0.154297	0.000539119
	17	1	2	7	7	200	0.972233	0.0855801	0.970784	2.27537	0.327422	0.236229	1
	17	1	3	4	7	7	0.876135	0.0470499	0.972233	0.972233	0.287844	0.408088	0.0117784
	17	1	4	7	4	7	1.14486	0.137538	0.876135	0.972233	0.400458	0.625465	0.958353
	18	1	1	7	200	200	0.961229	0	2.27537	2.27537	0.304679	0.127382	0.000139913
	18	1	2	7	7	200	0.964055	0.0177829	0.961229	2.27537	0.309507	0.205119	0.0116431
	18	1	3	7	7	200	0.973602	0.0911372	0.964055	2.27537	0.329149	0.239755	0.877278
	18	1	4	7	7	7	0.982227	0.0253776	0.973602	0.973602	0.317144	0.45518	0.0208388
	18	1	5	7	7	7	1.02738	0.433087	0.982227	0.973602	0.431293	0.714931	1
	19	1	1	4	200	200	0.740514	0.125592	2.27537	2.27537	0.262904	0.10616	0.0305072
	19	1	2	4	4	200	0.743121	0.134853	0.740514	2.27537	0.265537	0.183178	0.999995
	19	1	3	4	4	4	0.773558	0.0146338	0.743121	0.743121	0.250598	0.400746	0.36251
	19	1	4	4	4	4	0.776948	0.00555715	0.773558	0.773558	0.249804	0.388203	1
	20	1	1	7	200	200	0.969534	0.0712241	2.27537	2.27537	0.323263	0.150496	0.999988
	20	1	2	7	7	7	1.02001	0.17857	0.969534	0.969534	0.365626	0.571523	1
	20	1	3	7	7	7	1.0999	0.0141705	1.02001	1.02001	0.354449	0.502097	1
	21	1	1	1	200	200	0.037033	0.309355	2.27537	2.27537	0.128884	0.0349642	0.0582601
	21	1	2	4	1	200	0.755778	0.34344	0.037033	2.27537	0.313802	0.336933	0.999948
	21	1	3	4	4	4	0.783037	0.0884533	0.755778	0.755778	0.268026	0.446316	1
	21	1	4	4	4	4	0.828948	0.0139856	0.783037	0.783037	0.266618	0.419421	0.0410563
	21	1	5	4	4	4	0.830838	0.0258409	0.828948	0.783037	0.269588	0.423139	0.072174
	21	1	6	4	4	4	0.860725	0.417067	0.830838	0.783037	0.366647	0.671754	0.999993
	22	1	1	4	200	200	0.749413	0.289071	2.27537	2.27537	0.299786	0.153179	5.27928e-05
	22	1	2	1	4	200	0.0381799	0.323156	0.749413	2.27537	0.130693	0.0642822	0.163464
	22	1	3	1	1	200	0.0438018	0.393733	0.0381799	2.27537	0.14024	0.0987636	0.277043
	22	1	4	4	1	1	0.775358	0.139025	0.0438018	0.0438018	0.276071	0.68649	1
	23	1	1	1	200	200	0.0277414	0.160327	2.27537	2.27537	0.111142	0.0240308	0.0192644
	23	1	2	4	1	200	0.751405	0.296388	0.0277414	2.27537	0.302016	0.310322	1
	23	1	3	4	4	4	0.831208	0.0301014	0.751405	0.751405	0.270568	0.440098	0.99999
	23	1	4	4	4	4	0.855965	0.0439018	0.831208	0.831208	0.280938	0.437937	0.999998
	24	1	1	1	200	200	0.0349082	0.274993	2.27537	2.27537	0.124593	0.0320817	0.0137443
	24	1	2	4	1	200	0.762649	0.423928	0.0349082	2.27537	0.33432	0.38622	0.999997
	24	1	3	4	4	4	0.793957	0.0157456	0.762649	0.762649	0.256689	0.406928	0.00214644
	24	1	4	4	4	4	0.796837	0.0394567	0.793957	0.762649	0.262242	0.419618	0.999998
	24	1	5	4	4	4	0.828288	0.0196354	0.796837	0.796837	0.267566	0.418197	0.00477725
	24	1	6	1	4	4	0.0946228	0.0771523	0.828288	0.796837	0.112703	0.129093	0.000302707
	24	1	7	1	1	4	0.0967044	0.109569	0.0946228	0.796837	0.116425	0.1773	0.00156287
	24	1	8	4	1	4	0.847194	0.248499	0.0967044	0.796837	0.322665	0.634279	1
	25	1	1	4	200	200	0.751292	0.176995	2.26492	2.26492	0.276604	0.122753	1
	25	1	2	4	4	4	0.802186	0.108179	0.751292	0.751292	0.277853	0.470754	0.999682
	25	1	3	4	4	4	0.818321	0.0394558	0.802186	0.802186	0.268613	0.422727	0.00142596
	25	1	4	4	4	4	0.819921	0.0527003	0.818321	0.802186	0.271794	0.430003	0.0275419
	25	1	5	1	4	4	0.0859226	0.059554	0.819921	0.802186	0.109597	0.122003	7.48983e-05
	25	1	6	1	1	4	0.088498	0.101232	0.0859226	0.802186	0.114271	0.171448	0.0393995
	25	1	7	1	1	4	0.0913911	0.140131	0.088498	0.802186	0.118867	0.186258	0.00198307
	25	1	8	4	1	4	0.830129	0.146892	0.0913911	0.802186	0.294715	0.56459	1
	26	1	1	4	200	200	0.736677	0.0183386	2.26492	2.26492	0.240911	0.0840294	0.00377805
	26	1	2	4	4	200	0.738262	0.0254703	0.736677	2.26492	0.242705	0.146365	0.00384115
	26	1	3	4	4	200	0.743128	0.0677046	0.738262	2.26492	0.252217	0.161194	0.005695
	26	1	4	1	4	200	0.0332372	0.0849318	0.743128	2.26492	0.104448	0.0369358	0.360553
	26	1	5	4	1	200	0.752766	0.124851	0.0332372	2.26492	0.266381	0.229993	0.017237
	26	1	6	4	4	200	0.766736	0.270633	0.752766	2.26492	0.301317	0.249056	1.58047e-05
	26	1	7	4	4	200	0.769802	0.302402	0.766736	2.26492	0.309274	0.264187	0.032295
	26	1	8	1	4	200	0.0510671	0.310182	0.769802	2.26492	0.131397	0.0642318	0.203051
	26	1	9	1	1	1	0.0598233	0.125777	0.0510671	0.0510671	0.112439	0.284408	0.00591305
	26	1	10	1	1	1	0.0608899	0.133186	0.0598233	0.0510671	0.113369	0.287911	0.992599
	26	1	11	1	1	1	0.0750052	0.152451	0.0608899	0.0608899	0.117597	0.302708	1
	26	1	12	4	1	1	0.852426	0.0133369	0.0750052	0.0750052	0.273525	0.6494	0.981203
	26	1	13	4	4	4	0.858354	0.0112993	0.852426	0.852426	0.2749	0.413291	0.999999
	27	1	1	4	200	200	0.744076	0.0979911	2.26492	2.26492	0.258447	0.101861	0.137995
	27	1	2	4	4	200	0.752373	0.165233	0.744076	2.26492	0.274503	0.199164	0.000807731
	27	1	3	4	4	200	0.76786	0.330465	0.752373	2.26492	0.314871	0.277983	1
	27	1	4	4	4	4	0.822214	0.0443552	0.76786	0.76786	0.270777	0.438447	0.999958
	27	1	5	4	4	4	0.841455	0.0224135	0.822214	0.822214	0.272077	0.419557	0.00484708
	27	1	6	4	4	4	0.851202	0.146892	0.841455	0.822214	0.30142	0.498762	1
	28	1	1	1	200	200	0.0331104	0.113273	2.26492	2.26492	0.107204	0.0220183	0.001244
	28	1	2	1	1	200	0.0374471	0.175976	0.0331104	2.26492	0.114236	0.0602204	0.000807025
	28	1	3	4	1	200	0.766785	0.337412	0.0374471	2.26492	0.316069	0.341344	0.999941
	28	1	4	1	4	4	0.0611927	0.00759477	0.766785	0.766785	0.100995	0.108435	0.000128451
	28	1	5	1	1	4	0.0633543	0.0389	0.0611927	0.766785	0.10428	0.148526	0.00116596
	28	1	6	4	1	4	0.790448	0.0438089	0.0633543	0.766785	0.261234	0.489195	0.999995
	28	1	7	4	4	4	0.81701	0.00379738	0.790448	0.790448	0.261045	0.404402	0.934465
	28	1	8	4	4	4	0.822029	0.0052792	0.81701	0.81701	0.262817	0.400067	0.9995
	28	1	9	4	4	4	0.83933	0.0776135	0.822029	0.822029	0.282874	0.451591	0.00161917
	28	1	10	1	4	4	0.108216	0.246178	0.83933	0.822029	0.133781	0.183947	0.0001489
	28	1	11	4	1	4	0.854555	0.274241	0.108216	0.822029	0.330985	0.646691	1
	29	1	1	7	200	200	0.963676	0.0213956	2.26492	2.26492	0.310183	0.135503	0.0339203
	29	1	2	7	7	200	0.970262	0.0626122	0.963676	2.26492	0.321558	0.227504	0.999872
	29	1	3	7	7	7	1.00242	0.0967896	0.970262	0.970262	0.340209	0.511532	0.99999
	29	1	4	7	7	7	1.03517	0.0197284	1.00242	1.00242	0.333533	0.473386	0.999999
	29	1	5	7	7	7	1.08229	0.0702982	1.03517	1.03517	0.361635	0.521416	1
	29	1	6	7	7	7	1.14582	0.0779856	1.08229	1.08229	0.386108	0.548151	0.875847
	30	1	1	7	200	200	0.974798	0.117629	2.26492	2.26492	0.335633	0.16913	0.999999
	30	1	2	7	7	7	1.02422	0.0344552	0.974798	0.974798	0.333219	0.484672	1
	31	1	1	7	200	200	0.970197	0.0775243	2.26492	2.26492	0.324911	0.154381	0.00741577
	31	1	2	7	7	200	0.973804	0.0973453	0.970197	2.26492	0.330636	0.243827	0.999999
	31	1	3	7	7	7	1.02937	0.0618712	0.973804	0.973804	0.341306	0.504743	1
	31	1	4	1	7	7	0.0947167	0.135502	1.02937	1.02937	0.118895	0.114519	0.00114203
	31	1	5	1	1	7	0.102289	0.268596	0.0947167	1.02937	0.135431	0.208738	0.0184086
	31	1	6	7	1	7	1.10637	0.335653	0.102289	1.02937	0.436052	0.762215	1
	32	1	1	1	200	200	0.0337456	0.190152	2.26492	2.26492	0.115153	0.0264927	0.0171861
	32	1	2	1	1	200	0.0352685	0.200711	0.0337456	2.26492	0.116509	0.0634212	0.99928
	32	1	3	1	1	1	0.0445706	0.00694662	0.0352685	0.0352685	0.0986633	0.226337	0.0148258
	32	1	4	1	1	1	0.0489952	0.06854	0.0445706	0.0352685	0.105106	0.255062	0.0189229
	32	1	5	1	1	1	0.0552638	0.161069	0.0489952	0.0352685	0.115424	0.303104	0.999995
	32	1	6	1	1	1	0.0766327	0.0503862	0.0552638	0.0552638	0.107314	0.254773	0.0328744
	32	1	7	7	1	1	1.06377	0.0507566	0.0766327	0.0766327	0.350542	0.76811	1
	33	1	1	7	200	200	0.967391	0.0974353	2.25418	2.25418	0.328502	0.161789	0.0110235
	33	1	2	7	7	200	0.999481	0.371958	0.967391	2.25418	0.405588	0.403763	1
	34	1	1	7	200	200	0.966433	0.0891922	2.25418	2.25418	0.326304	0.158775	0.0407253
	34	1	2	7	7	200	0.968883	0.0929896	0.966433	2.25418	0.327988	0.241734	0.999855
	34	1	3	7	7	7	0.99561	0.0480693	0.968883	0.968883	0.32671	0.478219	0.00493832
	34	1	4	7	7	7	0.999372	0.0723356	0.99561	0.968883	0.333525	0.492595	1
	35	1	1	7	200	200	0.956891	0.00805787	2.25418	2.25418	0.305047	0.131462	0.000254641
	35	1	2	7	7	200	0.959088	0.0199131	0.956891	2.25418	0.308365	0.207343	0.000237405
	35	1	3	7	7	200	0.965333	0.0675194	0.959088	2.25418	0.32103	0.229547	0.000184531
	35	1	4	7	7	200	0.96795	0.0844687	0.965333	2.25418	0.325737	0.237618	0.000467139
	35	1	5	7	7	200	0.978032	0.16514	0.96795	2.25418	0.347791	0.279695	0.00749589
	35	1	6	7	7	200	0.98851	0.245904	0.978032	2.25418	0.370682	0.32564	0.999911
	35	1	7	7	7	7	1.01101	0.00324167	0.98851	0.98851	0.321684	0.453718	0.00688932
	35	1	8	7	7	7	1.01642	0.0436236	1.01101	0.98851	0.332689	0.479222	0.0379204
	35	1	9	7	7	7	1.01846	0.0475136	1.01642	0.98851	0.334273	0.482249	0.999986
	35	1	10	7	7	7	1.04714	0.00592763	1.01846	1.01846	0.334409	0.466898	0.474062
	35	1	11	7	7	7	1.05144	0.00490881	1.04714	1.04714	0.335631	0.459817	0.000951707
	35	1	12	7	7	7	1.06111	0.0993803	1.05144	1.04714	0.36114	0.522698	1
	36	1	1	7	200	200	0.970711	0.126147	2.25418	2.25418	0.336211	0.172645	0.999811
	36	1	2	7	7	7	0.992537	0.0134298	0.970711	0.970711	0.317864	0.454779	1
	37	1	1	1	200	200	0.0255065	0.15301	2.25418	2.25418	0.110063	0.0241128	0.00627239
	37	1	2	4	1	200	0.738033	0.183205	0.0255065	2.25418	0.273862	0.252078	0.999365
	37	1	3	4	4	4	0.752612	0.0124113	0.738033	0.738033	0.244238	0.389325	0.0640183
	37	1	4	7	4	4	0.995683	0.0414943	0.752612	0.738033	0.32524	0.545085	1
	38	1	1	4	200	200	0.728156	0.0891017	2.25418	2.25418	0.252096	0.0977901	0.00126332
	38	1	2	4	4	200	0.729869	0.0965114	0.728156	2.25418	0.254037	0.16847	0.00390739
	38	1	3	4	4	200	0.767615	0.5021	0.729869	2.25418	0.354274	0.373558	0.106513
	38	1	4	4	4	200	0.773617	0.552116	0.767615	2.25418	0.368316	0.402378	1
	39	1	1	7	200	200	0.955193	0.0438099	2.25418	2.25418	0.312387	0.141296	0.0168711
	39	1	2	1	7	7	0.029129	0.152177	0.955193	0.955193	0.110519	0.112634	0.0170734
	39	1	3	4	1	7	0.744456	0.191633	0.029129	0.955193	0.277554	0.515756	0.099635
	39	1	4	4	4	7	0.751448	0.250819	0.744456	0.955193	0.292188	0.485324	0.99949
	39	1	5	4	4	4	0.768882	0.0451066	0.751448	0.751448	0.255209	0.413594	0.999998
	39	1	6	4	4	4	0.800786	0.00518679	0.768882	0.768882	0.256587	0.402648	0.999979
	39	1	7	7	4	4	1.07799	0.0550161	0.800786	0.800786	0.356492	0.582354	1
	40	1	1	7	200	200	0.972884	0.19506	2.25418	2.25418	0.353053	0.198877	0.999941
	40	1	2	7	7	7	0.997893	0.00389009	0.972884	0.972884	0.317491	0.451408	1
	40	1	3	7	7	7	1.05867	0.00583504	0.997893	0.997893	0.338303	0.479964	0.999947
	40	1	4	7	7	7	1.08111	0.0203763	1.05867	1.05867	0.349395	0.48284	0.999765
	40	1	5	1	7	7	0.103949	0.069187	1.08111	1.08111	0.113299	0.0952554	0.000914153
	40	1	6	1	1	7	0.104542	0.0732622	0.103949	1.08111	0.113814	0.135478	0.00198438
	40	1	7	4	1	7	0.848229	0.0793751	0.104542	1.08111	0.286	0.472975	0.999987
	40	1	8	4	4	4	0.870022	0.0245442	0.848229	0.848229	0.281213	0.429093	0.999483
	41	1	1	7	200	200	0.814422	0.0428827	2.27559	2.27559	0.268145	0.103284	0.00372168
	41	1	2	7	7	200	0.814897	0.0836351	0.814422	2.27559	0.276641	0.185023	0.000580438
	41	1	3	1	7	200	-0.189612	0.229881	0.814897	2.27559	0.0880413	0.0304021	0.0232031
	41	1	4	7	1	200	0.817899	0.383351	-0.189612	2.27559	0.343747	0.414507	0.999904
	41	1	5	1	7	7	-0.188484	0.0344543	0.817899	0.817899	0.0732237	0.0637919	3.0159e-05
	41	1	6	7	1	7	0.820235	0.043531	-0.188484	0.817899	0.270015	0.520251	0.774222
	41	1	7	7	7	7	0.821025	0.045476	0.820235	0.820235	0.270649	0.42233	0.999999
	41	1	8	1	7	7	-0.186913	0.012411	0.821025	0.821025	0.0718508	0.0606303	0.000691284
	41	1	9	7	1	7	0.825633	0.0433458	-0.186913	0.821025	0.271599	0.522447	0.0173415
	41	1	10	1	7	7	-0.186715	0.0558493	0.825633	0.821025	0.074926	0.0668889	0.000146168
	41	1	11	1	1	7	-0.186501	0.125962	-0.186715	0.821025	0.0801335	0.11273	5.10384e-06
	41	1	12	7	1	7	0.826904	0.152729	-0.186501	0.821025	0.29495	0.589107	0.00662266
	41	1	13	1	7	7	-0.18493	0.678713	0.826904	0.821025	0.133952	0.248272	0.000413821
	41	1	14	7	1	7	0.832045	0.704276	-0.18493	0.821025	0.427219	0.848272	0.85206
	42	1	1	1	200	200	-0.189876	0.156063	2.27559	2.27559	0.082071	0.0144691	0.922691
	42	1	2	7	1	1	0.816389	0.0345469	-0.189876	-0.189876	0.267041	0.714399	0.0913789
	42	1	3	1	7	1	-0.189079	0.204225	0.816389	-0.189876	0.0859977	0.196955	0.990717
	42	1	4	7	1	1	0.819511	0.0576091	-0.189079	-0.189079	0.272677	0.727016	1
	43	1	1	1	200	200	-0.189429	0.315183	2.27559	2.27559	0.0954111	0.0212317	0.00201334
	43	1	2	1	1	200	-0.188968	0.469023	-0.189429	2.27559	0.110124	0.07737	4.1347e-05
	43	1	3	7	1	200	0.818868	0.501533	-0.188968	2.27559	0.372166	0.486452	1
	43	1	4	7	7	7	0.826198	0.00879882	0.818868	0.818868	0.264756	0.403909	0.999999
	43	1	5	7	7	7	0.830586	0.00694644	0.826198	0.826198	0.265683	0.403062	0.251607
	43	1	6	1	7	7	-0.185044	0.0587205	0.830586	0.830586	0.0753089	0.0669349	0.000458096
	43	1	7	1	1	7	-0.184995	0.0687234	-0.185044	0.830586	0.0760376	0.0989826	0.00124236
	43	1	8	7	1	7	0.831773	0.0861358	-0.184995	0.830586	0.282331	0.549798	0.986694
	44	1	1	7	200	200	0.814974	0.101788	2.27559	2.27559	0.280437	0.117549	0.0472339
	44	1	2	7	7	200	0.816449	0.245441	0.814974	2.27559	0.311851	0.252865	0.999998
	44	1	3	7	7	7	0.820331	0.0218581	0.816449	0.816449	0.265649	0.409056	1
	44	1	4	7	7	7	0.82829	0.087062	0.820331	0.820331	0.281452	0.451483	0.99999
	44	1	5	7	7	7	0.83103	0.00527929	0.82829	0.82829	0.265478	0.401697	0.0327956
	44	1	6	7	7	7	0.831386	0.0287119	0.83103	0.82829	0.270338	0.415489	0.997338
	45	1	1	7	200	200	0.814693	0.011485	2.27497	2.27497	0.2619	0.096506	0.0718472
	45	1	2	7	7	200	0.815159	0.0424206	0.814693	2.27497	0.268271	0.170444	0.00347309
	45	1	3	7	7	200	0.817882	0.319451	0.815159	2.27497	0.328991	0.289357	1
	46	1	1	1	200	200	-0.189577	0.2021	2.27497	2.27497	0.0857657	0.0161899	0.0168673
	46	1	2	7	1	1	0.81743	0.0887312	-0.189577	-0.189577	0.27847	0.741057	1
	47	1	1	7	200	200	0.818244	0.391603	2.27497	2.27497	0.345794	0.214443	1
	48	1	1	7	200	200	0.814664	0.00842854	2.27497	2.27497	0.261281	0.0958501	0.0873215
	48	1	2	7	7	7	0.817626	0.297222	0.814664	0.814664	0.32385	0.574889	0.999956
	48	1	3	7	7	7	0.819926	0.0139858	0.817626	0.817626	0.263944	0.403826	0.0561325
	48	1	4	7	7	7	0.82029	0.0241742	0.819926	0.817626	0.266104	0.409826	1
	48	1	5	7	7	7	0.82996	0.209973	0.82029	0.82029	0.3084	0.527469	0.999994
	49	1	1	4	200	200	0.557537	0.413544	2.26509	2.26509	0.266702	0.137183	0.000981128
	49	1	2	4	4	200	0.557784	0.483565	0.557537	2.26509	0.281178	0.270555	0.00381828
	49	1	3	4	4	200	0.558102	0.575443	0.557784	2.26509	0.300878	0.317266	0.000245823
	49	1	4	4	4	200	0.558423	0.671581	0.558102	2.26509	0.322305	0.370397	0.031909
	49	1	5	4	4	4	0.559173	0.215525	0.558423	0.558423	0.229041	0.455645	0.00112059
	49	1	6	4	4	4	0.559332	0.258037	0.559173	0.558423	0.236941	0.481559	1
	49	1	7	4	4	4	0.56095	0.00342691	0.559332	0.559332	0.193037	0.333178	1
	50	1	1	4	200	200	0.556481	0.0786337	2.26509	2.26509	0.204336	0.0653273	0.000543326
	50	1	2	4	4	200	0.557085	0.262205	0.556481	2.26509	0.237102	0.177317	0.993149
	50	1	3	4	4	4	0.557389	0.00500143	0.557085	0.557085	0.192448	0.33282	0.0139906
	50	1	4	4	4	4	0.55745	0.0133372	0.557389	0.557085	0.193806	0.337369	0.00546465
	50	1	5	4	4	4	0.557497	0.0188017	0.55745	0.557085	0.194702	0.340384	0.00468135
	50	1	6	4	4	4	0.557621	0.047421	0.557497	0.557085	0.199415	0.356339	0.0223562
	50	1	7	4	4	4	0.557773	0.0830794	0.557621	0.557085	0.205406	0.376662	0.400156
	50	1	8	4	4	4	0.557929	0.0169493	0.557773	0.557773	0.194504	0.339431	0.400491
	50	1	9	4	4	4	0.558075	0.033065	0.557929	0.557773	0.197164	0.34839	0.0184514
	50	1	10	4	4	4	0.558325	0.101603	0.558075	0.557773	0.208689	0.387483	0.0315713
	50	1	11	4	4	4	0.558706	0.210245	0.558325	0.557773	0.227953	0.452322	0.000231914
	50	1	12	4	4	4	0.558741	0.215247	0.558706	0.557773	0.228874	0.455338	0.280223
	50	1	13	4	4	4	0.558986	0.266373	0.558741	0.557773	0.238408	0.486634	0.999994
	50	1	14	4	4	4	0.560162	0.0514036	0.558986	0.558986	0.200692	0.359426	0.0426256
	50	1	15	4	4	4	0.560258	0.0694644	0.560162	0.558986	0.203729	0.369606	0.999967
	50	1	16	4	4	4	0.561066	0.0157453	0.560258	0.560258	0.195057	0.339708	0.999395
	50	1	17	4	4	4	0.561605	0.0241736	0.561066	0.561066	0.196559	0.344403	0.0272028
	50	1	18	4	4	4	0.56167	0.0288972	0.561605	0.561066	0.197347	0.347003	0.998114
	50	1	19	4	4	4	0.562138	0.0283415	0.56167	0.56167	0.197369	0.346818	0.0079186
	50	1	20	4	4	4	0.562271	0.0608508	0.562138	0.56167	0.202783	0.365079	0.0194072
	51	1	1	4	200	200	0.556553	0.101603	2.26509	2.26509	0.208244	0.0688547	0.00557542
	51	1	2	4	4	200	0.556709	0.144208	0.556553	2.26509	0.215643	0.138925	0.0569317
	51	1	3	4	4	200	0.556778	0.151247	0.556709	2.26509	0.216894	0.14101	0.996914
	51	1	4	4	4	4	0.557183	0.0249145	0.556778	0.556778	0.19562	0.343704	0.0198964
	51	1	5	4	4	4	0.557242	0.0313979	0.557183	0.556778	0.196691	0.347286	0.0334461
	51	1	6	4	4	4	0.557427	0.0761329	0.557242	0.556778	0.20415	0.372589	0.0433864
	51	1	7	4	4	4	0.557493	0.0836351	0.557427	0.556778	0.20543	0.376909	0.999946
	51	1	8	4	4	4	0.558234	0.01167	0.557493	0.557493	0.193723	0.336778	0.00217561
	51	1	9	4	4	4	0.558362	0.0445498	0.558234	0.557493	0.199121	0.354977	0.999992
	51	1	10	4	4	4	0.559357	0.01167	0.558362	0.558362	0.19399	0.337118	0.0238674
	51	1	11	4	4	4	0.559451	0.0274153	0.559357	0.558362	0.196571	0.345741	0.0759804
	51	1	12	4	4	4	0.559563	0.0431605	0.559451	0.558362	0.199183	0.354557	0.997406
	51	1	13	4	4	4	0.559936	0.00759477	0.559563	0.559563	0.193469	0.334858	0.00578119
	51	1	14	4	4	4	0.560067	0.0380665	0.559936	0.559563	0.198466	0.351698	0.0295306
	51	1	15	4	4	4	0.560134	0.0446424	0.560067	0.559563	0.199566	0.3554	0.999999
	51	1	16	4	4	4	0.56187	0.094842	0.560134	0.560134	0.208425	0.384844	0.999905
	52	1	1	4	200	200	0.5565	0.0846539	2.26509	2.26509	0.205355	0.0662353	0.359018
	52	1	2	4	4	4	0.556667	0.0234326	0.5565	0.5565	0.195255	0.342695	0.0919519
	52	1	3	4	4	4	0.556783	0.0374181	0.556667	0.5565	0.197566	0.35049	0.00169345
	52	1	4	4	4	4	0.55683	0.0417712	0.556783	0.5565	0.198292	0.352933	0.000147796
	52	1	5	4	4	4	0.557124	0.126333	0.55683	0.5565	0.212638	0.401648	0.00275434
	52	1	6	4	4	4	0.557441	0.218859	0.557124	0.5565	0.229185	0.457207	0.771875
	52	1	7	4	4	4	0.557592	0.013615	0.557441	0.557441	0.193884	0.337522	0.999877
	52	1	8	4	4	4	0.558264	0.01945	0.557592	0.557592	0.19499	0.34103	4.01172e-05
	52	1	9	4	4	4	0.558363	0.0455686	0.558264	0.557592	0.199289	0.355526	0.0253675
	52	1	10	4	4	4	0.558469	0.0657596	0.558363	0.557592	0.202668	0.366973	0.00569282
	52	1	11	4	4	4	0.55854	0.0731691	0.558469	0.557592	0.203927	0.371223	4.74886e-05
	52	1	12	4	4	4	0.558578	0.0799303	0.55854	0.557592	0.205074	0.375107	0.000975334
	52	1	13	4	4	4	0.558608	0.0820606	0.558578	0.557592	0.205441	0.376342	0.999765
	52	1	14	4	4	4	0.559316	0.0525151	0.558608	0.558608	0.20067	0.359708	1
	52	1	15	4	4	4	0.560984	0.0368624	0.559316	0.559316	0.198489	0.351617	0.999996
	52	1	16	4	4	4	0.562157	0.0406598	0.560984	0.560984	0.1994	0.353884	0.0185182
	52	1	17	4	4	4	0.562295	0.0694644	0.562157	0.560984	0.204232	0.370126	0.0625123
	52	1	18	4	4	4	0.562365	0.0761329	0.562295	0.560984	0.205373	0.373964	0.853556
	53	1	1	4	200	200	0.556711	0.0961409	2.26456	2.26456	0.207354	0.0680684	0.172496
	53	1	2	4	4	200	0.556789	0.102902	0.556711	2.26456	0.208525	0.127335	0.00591165
	53	1	3	4	4	200	0.556852	0.107348	0.556789	2.26456	0.2093	0.128562	0.999999
	53	1	4	4	4	4	0.558155	0.00815068	0.556852	0.556852	0.193136	0.334995	0.999631
	53	1	5	7	4	4	0.821251	0.0436246	0.558155	0.558155	0.270339	0.502916	1
	53	1	6	4	7	7	0.561443	0.0302872	0.821251	0.821251	0.197521	0.277748	0.311436
	53	1	7	4	4	7	0.561604	0.0488114	0.561443	0.821251	0.200614	0.308481	0.664002
	53	1	8	4	4	7	0.561813	0.0666873	0.561604	0.821251	0.203647	0.31798	0.00041446
	53	1	9	4	4	7	0.561965	0.106978	0.561813	0.821251	0.210527	0.339793	0.999952
	54	1	1	7	200	200	0.814269	0.0100031	2.26456	2.26456	0.261479	0.0972458	3.11618e-05
	54	1	2	7	7	200	0.815237	0.109386	0.814269	2.26456	0.282107	0.196338	1.81858e-05
	54	1	3	7	7	200	0.818415	0.445601	0.815237	2.26456	0.358594	0.359004	0.999941
	54	1	4	4	7	7	0.558738	0.0659464	0.818415	0.818415	0.202766	0.295016	1
	54	1	5	4	4	4	0.561755	0.0074097	0.558738	0.558738	0.193871	0.335931	0.957007
	54	1	6	7	4	4	0.831215	0.0762273	0.561755	0.561755	0.280088	0.527498	0.996281
	54	1	7	4	7	7	0.562596	0.0187095	0.831215	0.831215	0.195906	0.270161	0.250829
	55	1	1	7	200	200	0.821336	0.768757	2.26456	2.26456	0.439595	0.412102	1
	56	1	1	7	200	200	0.814644	0.0499229	2.26456	2.26456	0.269643	0.106247	0.0876365
	56	1	2	4	7	200	0.556998	0.157271	0.814644	2.26456	0.218012	0.13088	0.270295
	56	1	3	4	4	200	0.557161	0.180056	0.556998	2.26456	0.222098	0.149923	0.00357268
	56	1	4	4	4	200	0.557289	0.211269	0.557161	2.26456	0.22776	0.159951	0.00582687
	56	1	5	7	4	200	0.817503	0.278142	0.557289	2.26456	0.319504	0.291202	0.000328307
	56	1	6	4	7	200	0.557611	0.297129	0.817503	2.26456	0.243845	0.174984	0.0816966
	56	1	7	7	4	200	0.818349	0.346959	0.557611	2.26456	0.33546	0.32754	0.0116446
	56	1	8	4	7	200	0.557869	0.353906	0.818349	2.26456	0.254909	0.195994	1
	56	1	9	4	4	4	0.562061	0.0171349	0.557869	0.557869	0.195521	0.341665	0.888938
	56	1	10	4	4	4	0.562271	0.0141711	0.562061	0.562061	0.19509	0.338966	9.68441e-05
	56	1	11	4	4	4	0.562381	0.0451992	0.562271	0.562061	0.200205	0.356218	0.00661674
	56	1	12	4	4	4	0.562476	0.0627046	0.562381	0.562061	0.203143	0.366141	0.150944
	56	1	13	7	4	4	0.832292	0.0773388	0.562476	0.562061	0.28065	0.528663	0.656573
	57	1	1	4	200	200	0.556764	0.292213	2.25433	2.25433	0.242672	0.106781	0.0325284
	57	1	2	1	4	200	-0.189845	0.315368	0.556764	2.25433	0.0953729	0.0417502	0.0105133
	57	1	3	4	1	200	0.557155	0.391594	-0.189845	2.25433	0.262173	0.286276	0.999517
	57	1	4	4	4	4	0.558221	0.184683	0.557155	0.557155	0.223206	0.436845	0.997438
	57	1	5	4	4	4	0.558759	0.0635367	0.558221	0.558221	0.202368	0.365755	0.999945
	57	1	6	4	4	4	0.559594	0.0426048	0.558759	0.558759	0.199099	0.354247	0.999997
	57	1	7	1	4	4	-0.186242	0.0621474	0.559594	0.559594	0.0754288	0.0920306	0.00291558
	57	1	8	1	1	4	-0.186156	0.0837277	-0.186242	0.559594	0.0770095	0.125518	0.004235
	57	1	9	1	1	4	-0.186035	0.117348	-0.186156	0.559594	0.0795312	0.134858	0.00319557
	57	1	10	4	1	4	0.561233	0.132168	-0.186035	0.559594	0.214702	0.479089	0.999986
	58	1	1	4	200	200	0.556105	0.0835425	2.25433	2.25433	0.20507	0.0668477	0.199244
	58	1	2	1	4	200	-0.190376	0.108642	0.556105	2.25433	0.0783962	0.0255762	0.00316728
	58	1	3	1	1	200	-0.189853	0.284248	-0.190376	2.25433	0.092631	0.051459	0.000353046
	58	1	4	1	1	200	-0.189796	0.297678	-0.189853	2.25433	0.0938124	0.053083	0.0208134
	58	1	5	1	1	200	-0.189669	0.331854	-0.189796	2.25433	0.0968777	0.0574616	0.00103422
	58	1	6	4	1	200	0.557173	0.354453	-0.189669	2.25433	0.254816	0.268069	0.999999
	58	1	7	1	4	4	-0.188363	0.0301012	0.557173	0.557173	0.0729313	0.0855364	8.51041e-05
	58	1	8	1	1	4	-0.188243	0.0666858	-0.188363	0.557173	0.075544	0.120807	0.000152474
	58	1	9	1	1	4	-0.18817	0.0869694	-0.188243	0.557173	0.0770301	0.126191	0.000116409
	58	1	10	1	1	4	-0.188095	0.107994	-0.18817	0.557173	0.0785985	0.13199	0.0312955
	58	1	11	1	1	4	-0.188018	0.121979	-0.188095	0.557173	0.0796611	0.135978	9.65703e-06
	58	1	12	1	1	4	-0.187656	0.24646	-0.188018	0.557173	0.0896703	0.175995	0.00116962
	58	1	13	4	1	4	0.559698	0.352694	-0.187656	0.557173	0.2552	0.611835	1
	59	1	1	4	200	200	0.556675	0.263965	2.25433	2.25433	0.237319	0.100347	0.99952
	59	1	2	4	4	4	0.557172	0.00592763	0.556675	0.556675	0.192546	0.333326	0.131719
	59	1	3	4	4	4	0.557442	0.0645555	0.557172	0.556675	0.202215	0.366026	0.00097981
	59	1	4	4	4	4	0.557739	0.152358	0.557442	0.556675	0.217338	0.417295	0.999988
	59	1	5	4	4	4	0.558677	0.0103733	0.557739	0.557739	0.193618	0.33623	0.996145
	59	1	6	4	4	4	0.55907	0.0161157	0.558677	0.558677	0.194641	0.339314	0.994821
	59	1	7	4	4	4	0.559425	0.0128741	0.55907	0.55907	0.194201	0.337613	0.00146175
	59	1	8	4	4	4	0.559721	0.100029	0.559425	0.55907	0.20877	0.386949	1
	60	1	1	1	200	200	-0.190745	0.00981763	2.25433	2.25433	0.0712853	0.010412	0.00120131
	60	1	2	4	1	200	0.55724	0.434199	-0.190745	2.25433	0.270811	0.308159	0.999213
	60	1	3	4	4	4	0.557851	0.0551084	0.55724	0.55724	0.200743	0.36078	1
	61	1	1	1	200	200	-0.190393	0.0152825	2.2538	2.2538	0.071696	0.0105662	0.00252979
	61	1	2	1	1	200	-0.190348	0.021766	-0.190393	2.2538	0.0721481	0.0277316	0.00688303
	61	1	3	1	1	200	-0.189645	0.260729	-0.190348	2.2538	0.0906327	0.0487646	0.00570048
	61	1	4	1	1	200	-0.189309	0.36993	-0.189645	2.2538	0.100428	0.0627928	0.000176621
	61	1	5	1	1	200	-0.18928	0.373727	-0.189309	2.2538	0.100787	0.0633379	0.00161404
	61	1	6	1	1	200	-0.188289	0.719297	-0.18928	2.2538	0.138286	0.136341	0.998503
	61	1	7	1	1	1	-0.187841	0.0376969	-0.188289	-0.188289	0.0735183	0.195586	0.00217891
	61	1	8	1	1	1	-0.187584	0.121427	-0.187841	-0.188289	0.0796676	0.229908	0.119574
	61	1	9	1	1	1	-0.187513	0.00815067	-0.187584	-0.187584	0.0714969	0.184443	0.519692
	61	1	10	1	1	1	-0.187368	0.0211177	-0.187513	-0.187513	0.0724072	0.189302	0.00378756
	61	1	11	1	1	1	-0.187261	0.0489041	-0.187368	-0.187513	0.0743724	0.199987	0.000875351
	61	1	12	1	1	1	-0.186707	0.239889	-0.187261	-0.187513	0.0892345	0.285399	5.9309e-06
	61	1	13	1	1	1	-0.18643	0.334919	-0.186707	-0.187513	0.0975882	0.335169	0.9884
	61	1	14	1	1	1	-0.18615	0.0213029	-0.18643	-0.18643	0.0725446	0.189598	0.0122674
	61	1	15	1	1	1	-0.185517	0.237852	-0.18615	-0.18643	0.0892103	0.284668	0.00522751
	61	1	16	1	1	1	-0.185442	0.254431	-0.185517	-0.18643	0.0906227	0.292985	0.00480585
	61	1	17	1	1	1	-0.185312	0.290368	-0.185442	-0.18643	0.0937495	0.311583	0.000192264
	61	1	18	1	1	1	-0.185207	0.321859	-0.185312	-0.18643	0.0965674	0.328388	0.00653777
	61	1	19	1	1	1	-0.185033	0.372523	-0.185207	-0.18643	0.101261	0.356369	0.0420032
	61	1	20	1	1	1	-0.184952	0.386416	-0.185033	-0.18643	0.102587	0.364231	0.765742
	62	1	1	1	200	200	-0.190277	0.0565916	2.2538	2.2538	0.0746043	0.0116799	0.0456819
	62	1	2	1	1	200	-0.190182	0.0743749	-0.190277	2.2538	0.0758942	0.0314319	0.0161989
	62	1	3	1	1	200	-0.189997	0.126428	-0.190182	2.2538	0.0797779	0.0355629	0.014724
	62	1	4	1	1	200	-0.189118	0.424576	-0.189997	2.2538	0.105678	0.0711752	0.000523745
	62	1	5	1	1	200	-0.189051	0.441618	-0.189118	2.2538	0.107365	0.0739685	0.00220896
	62	1	6	1	1	200	-0.188763	0.536	-0.189051	2.2538	0.11713	0.09148	0.0149324
	62	1	7	1	1	200	-0.188566	0.594073	-0.188763	2.2538	0.123518	0.104027	0.0124978
	62	1	8	1	1	200	-0.188479	0.615654	-0.188566	2.2538	0.125969	0.109064	0.0909891
	62	1	9	1	1	200	-0.188398	0.623619	-0.188479	2.2538	0.126893	0.110988	0.991309
	62	1	10	1	1	1	-0.188126	0.00527941	-0.188398	-0.188398	0.0712383	0.183328	0.366666
	62	1	11	1	1	1	-0.187616	0.155048	-0.188126	-0.188398	0.082251	0.24482	0.000217111
	62	1	12	1	1	1	-0.187559	0.169682	-0.187616	-0.188398	0.0834074	0.251487	0.000229971
	62	1	13	1	1	1	-0.187528	0.174406	-0.187559	-0.188398	0.0837853	0.253679	0.00512085
	62	1	14	1	1	1	-0.187435	0.197746	-0.187528	-0.188398	0.0856682	0.264682	0.00614602
	62	1	15	1	1	1	-0.18738	0.206823	-0.187435	-0.188398	0.086413	0.269044	0.0288726
	62	1	16	1	1	1	-0.187258	0.235906	-0.18738	-0.188398	0.0888324	0.28332	0.000372574
	62	1	17	1	1	1	-0.18713	0.274807	-0.187258	-0.188398	0.0921595	0.303091	0.000127489
	62	1	18	1	1	1	-0.187029	0.304817	-0.18713	-0.188398	0.0948025	0.31886	7.1639e-05
	62	1	19	1	1	1	-0.186931	0.334919	-0.187029	-0.188398	0.0975212	0.335108	0.00111918
	62	1	20	1	1	1	-0.186674	0.419575	-0.186931	-0.188398	0.10554	0.382847	0.00018832
	62	1	21	1	1	1	-0.186594	0.441526	-0.186674	-0.188398	0.107714	0.395634	0.00121712
	62	1	22	1	1	1	-0.186386	0.507565	-0.186594	-0.188398	0.114489	0.434957	0.000267598
	62	1	23	1	1	1	-0.186352	0.513307	-0.186386	-0.188398	0.115098	0.438412	0.0077388
	62	1	24	1	1	1	-0.186249	0.537759	-0.186352	-0.188398	0.117715	0.453249	0.00723417
	62	1	25	1	1	1	-0.186126	0.570362	-0.186249	-0.188398	0.121282	0.473141	0.000279472
	62	1	26	1	1	1	-0.186089	0.57666	-0.186126	-0.188398	0.121984	0.476994	0.0536598
	62	1	27	1	1	1	-0.185842	0.648812	-0.186089	-0.188398	0.130247	0.521239	0.00697129
	62	1	28	1	1	1	-0.185728	0.678081	-0.185842	-0.188398	0.133735	0.539117	0.0158429
	62	1	29	1	1	1	-0.185672	0.682712	-0.185728	-0.188398	0.134301	0.541952	0.99999
	63	1	1	1	200	200	-0.190117	0.113646	2.2538	2.2538	0.0787995	0.0134112	0.00155089
	63	1	2	1	1	200	-0.190044	0.130689	-0.190117	2.2538	0.0800966	0.0359175	0.0140279
	63	1	3	1	1	200	-0.189968	0.144767	-0.190044	2.2538	0.0811847	0.0371349	0.00554204
	63	1	4	1	1	200	-0.18989	0.161439	-0.189968	2.2538	0.0824892	0.0386268	0.000407632
	63	1	5	1	1	200	-0.189701	0.22155	-0.18989	2.2538	0.0873412	0.0444923	0.0015516
	63	1	6	1	1	200	-0.189439	0.306206	-0.189701	2.2538	0.0946115	0.0542046	0.999283
	63	1	7	1	1	1	-0.188984	0.0170423	-0.189439	-0.189439	0.0719603	0.187571	3.84603e-05
	63	1	8	1	1	1	-0.188926	0.0330658	-0.188984	-0.189439	0.0730808	0.193612	5.18962e-05
	63	1	9	1	1	1	-0.188744	0.0929918	-0.188926	-0.189439	0.0774117	0.217604	0.00370693
	63	1	10	1	1	1	-0.188523	0.161439	-0.188744	-0.189439	0.0826467	0.247542	0.0189455
	63	1	11	1	1	1	-0.18837	0.202007	-0.188523	-0.189439	0.0859022	0.266542	0.000944607
	63	1	12	1	1	1	-0.188159	0.270917	-0.18837	-0.189439	0.091693	0.300861	0.000717151
	63	1	13	1	1	1	-0.188125	0.276011	-0.188159	-0.189439	0.092137	0.303488	0.996937
	63	1	14	1	1	1	-0.18779	0.0112998	-0.188125	-0.188125	0.0716853	0.18561	0.998997
	63	1	15	1	1	1	-0.187309	0.0363076	-0.18779	-0.18779	0.0734755	0.195148	0.0320197
	63	1	16	1	1	1	-0.186913	0.164218	-0.187309	-0.18779	0.0830511	0.249139	9.75452e-06
	63	1	17	1	1	1	-0.18684	0.188392	-0.186913	-0.18779	0.0849838	0.26037	0.001933
	63	1	18	1	1	1	-0.186438	0.323434	-0.18684	-0.18779	0.0965462	0.328997	0.0245048
	63	1	19	1	1	1	-0.186286	0.363631	-0.186438	-0.18779	0.100255	0.351107	0.0039451
	63	1	20	1	1	1	-0.186194	0.386323	-0.186286	-0.18779	0.102405	0.363895	0.00181592
	63	1	21	1	1	1	-0.186066	0.422168	-0.186194	-0.18779	0.105881	0.384489	0.0120229
	63	1	22	1	1	1	-0.185949	0.452362	-0.186066	-0.18779	0.108891	0.402169	0.00106447
	63	1	23	1	1	1	-0.185671	0.544891	-0.185949	-0.18779	0.118575	0.457741	0.9855
	63	1	24	1	1	1	-0.18542	0.00916951	-0.185671	-0.185671	0.0717787	0.185191	0.0101107
	63	1	25	1	1	1	-0.18535	0.0237111	-0.18542	-0.185671	0.0727944	0.19063	0.00389301
	63	1	26	1	1	1	-0.185215	0.0613153	-0.18535	-0.185671	0.0754778	0.205278	0.013106
	64	1	1	1	200	200	-0.189753	0.243131	2.2538	2.2538	0.0891305	0.0183339	2.07062e-05
	64	1	2	1	1	200	-0.18963	0.281569	-0.189753	2.2538	0.0924268	0.0511753	1.82153e-05
	64	1	3	1	1	200	-0.189598	0.286015	-0.18963	2.2538	0.0928173	0.0517074	7.32573e-05
	64	1	4	1	1	200	-0.189533	0.302501	-0.189598	2.2538	0.0942715	0.0537285	0.000149557
	64	1	5	1	1	200	-0.189454	0.325842	-0.189533	2.2538	0.0963635	0.0567156	0.000357225
	64	1	6	1	1	200	-0.189054	0.46218	-0.189454	2.2538	0.10942	0.0774984	0.00326607
	64	1	7	1	1	200	-0.188975	0.482001	-0.189054	2.2538	0.111445	0.0810392	0.0273591
	64	1	8	1	1	200	-0.188876	0.502656	-0.188975	2.2538	0.113593	0.0848989	0.0030963
	64	1	9	1	1	200	-0.188835	0.508028	-0.188876	2.2538	0.11416	0.0859301	0.00397722
	64	1	10	1	1	200	-0.188756	0.525533	-0.188835	2.2538	0.116016	0.0893682	0.00016669
	64	1	11	1	1	200	-0.18848	0.618155	-0.188756	2.2538	0.126254	0.109667	0.00162827
	64	1	12	1	1	200	-0.188444	0.622045	-0.18848	2.2538	0.126704	0.110598	0.000334221
	64	1	13	1	1	200	-0.188182	0.707256	-0.188444	2.2538	0.136828	0.132899	2.88484e-05
	64	1	14	1	1	200	-0.188141	0.717167	-0.188182	2.2538	0.138051	0.135718	0.000727161
	64	1	15	1	1	200	-0.187818	0.825626	-0.188141	2.2538	0.152012	0.170059	0.0050961
	64	1	16	1	1	200	-0.187754	0.838964	-0.187818	2.2538	0.153811	0.174717	0.00296773
	64	1	17	1	1	200	-0.187683	0.854987	-0.187754	2.2538	0.155995	0.180463	1.7168e-05
	64	1	18	1	1	200	-0.1876	0.879995	-0.187683	2.2538	0.159447	0.189715	6.3019e-06
	64	1	19	1	1	200	-0.187421	0.939921	-0.1876	2.2538	0.167968	0.21335	0.000165652
	64	1	20	1	1	200	-0.187376	0.949832	-0.187421	2.2538	0.169415	0.217453	0.000316331
	64	1	21	1	1	200	-0.187097	1.04458	-0.187376	2.2538	0.183718	0.259589	1
	64	1	22	1	1	1	-0.185649	0.0445508	-0.187097	-0.187097	0.0742314	0.198811	0.0503521
	64	1	23	1	1	1	-0.185561	0.062612	-0.185649	-0.187097	0.0755346	0.205884	0.0303001
	64	1	24	1	1	1	-0.185444	0.0901205	-0.185561	-0.187097	0.0775582	0.217146	0.00123653
	64	1	25	1	1	1	-0.185273	0.1431	-0.185444	-0.187097	0.0815897	0.240052	0.863486
	64	1	26	1	1	1	-0.185087	0.0227848	-0.185273	-0.185273	0.0727567	0.190313	0.0307233
	64	1	27	1	1	1	-0.184968	0.0500155	-0.185087	-0.185273	0.0746922	0.200825	0.0221021
	65	1	1	7	200	200	0.814014	0.0261186	2.24325	2.24325	0.264635	0.103156	0.146282
	65	1	2	7	7	200	0.814376	0.04668	0.814014	2.24325	0.268902	0.175613	0.999937
	65	1	3	7	7	7	0.816971	0.0589058	0.814376	0.814376	0.272177	0.429856	0.999993
	65	1	4	7	7	7	0.820714	0.0825237	0.816971	0.816971	0.278184	0.445419	1
	66	1	1	7	200	200	0.813862	0.0100029	2.24325	2.24325	0.26136	0.0995336	0.0110191
	66	1	2	7	7	200	0.814702	0.0872472	0.813862	2.24325	0.27733	0.190575	3.48661e-05
	66	1	3	7	7	200	0.814837	0.0963239	0.814702	2.24325	0.279256	0.194022	0.94448
	66	1	4	7	7	7	0.815999	0.0614991	0.814837	0.814837	0.272415	0.430715	0.999988
	66	1	5	7	7	7	0.818932	0.0263965	0.815999	0.815999	0.266149	0.411091	0.994621
	66	1	6	7	7	7	0.820171	0.0371403	0.818932	0.818932	0.268696	0.417277	0.0013291
	66	1	7	7	7	7	0.820556	0.0681677	0.820171	0.818932	0.275165	0.435944	0.906785
	66	1	8	7	7	7	0.821073	0.00509405	0.820556	0.820556	0.262498	0.398358	0.000313174
	66	1	9	7	7	7	0.821319	0.0250072	0.821073	0.820556	0.266578	0.41018	0.000644936
	66	1	10	7	7	7	0.821875	0.0771517	0.821319	0.820556	0.277424	0.441657	0.999396
	66	1	11	7	7	7	0.823295	0.00685382	0.821875	0.821875	0.263506	0.400233	0.00249844
	66	1	12	7	7	7	0.823434	0.0133372	0.823295	0.821875	0.264851	0.40399	1
	67	1	1	7	200	200	0.813983	0.0228769	2.24325	2.24325	0.263974	0.102418	0.0865497
	67	1	2	7	7	200	0.814565	0.0647408	0.813983	2.24325	0.272647	0.18217	0.0437921
	67	1	3	7	7	200	0.814783	0.0701127	0.814565	2.24325	0.273817	0.184178	6.45461e-05
	67	1	4	7	7	200	0.817201	0.318888	0.814783	2.24325	0.328634	0.29441	1
	67	1	5	7	7	7	0.830576	0.0125036	0.817201	0.817201	0.266803	0.409058	0.999129
	67	1	6	7	7	7	0.831976	0.00972501	0.830576	0.830576	0.266657	0.404154	0.0249145
	68	1	1	7	200	200	0.814521	0.0801156	2.24325	2.24325	0.275799	0.116157	9.47607e-05
	68	1	2	7	7	200	0.816812	0.319073	0.814521	2.24325	0.328545	0.294338	0.999992
	68	1	3	7	7	7	0.81984	0.0139855	0.816812	0.816812	0.263918	0.404024	1
	68	1	4	7	7	7	0.828293	0.0490881	0.81984	0.81984	0.273579	0.428745	0.999961
	68	1	5	7	7	7	0.831281	0.0933601	0.828293	0.828293	0.283695	0.45455	0.996446
	69	1	1	1	200	200	-0.189705	0.0835444	2.24275	2.24275	0.0766133	0.0126547	0.00264018
	69	1	2	1	1	200	-0.189654	0.0934549	-0.189705	2.24275	0.0773471	0.0332201	0.449741
	69	1	3	4	1	200	0.557337	0.134857	-0.189654	2.24275	0.214172	0.177787	0.000925782
	69	1	4	1	4	200	-0.189345	0.160142	0.557337	2.24275	0.0824505	0.0292465	0.103636
	69	1	5	4	1	1	0.557529	0.00842854	-0.189345	-0.189345	0.193033	0.562164	1
	69	1	6	1	4	4	-0.186387	0.394474	0.557529	0.557529	0.103155	0.186379	0.999893
	69	1	7	1	1	1	-0.185771	0.0214881	-0.186387	-0.186387	0.0725963	0.189795	0.00258108
	69	1	8	1	1	1	-0.185707	0.0353813	-0.185771	-0.186387	0.0735762	0.195062	0.000125115
	69	1	9	1	1	1	-0.185662	0.0451066	-0.185707	-0.186387	0.0742695	0.198838	0.000678988
	69	1	10	4	1	1	0.561662	0.0657611	-0.185662	-0.186387	0.203454	0.597689	0.999999
	70	1	1	1	200	200	-0.189665	0.0978081	2.24275	2.24275	0.0776678	0.0130994	0.14102
	70	1	2	1	1	200	-0.189587	0.102902	-0.189665	2.24275	0.0780546	0.0339751	0.684814
	70	1	3	1	1	200	-0.189007	0.272492	-0.189587	2.24275	0.0917212	0.0506279	0.617112
	70	1	4	4	1	1	0.558014	0.0254709	-0.189007	-0.189007	0.195909	0.572572	0.988916
	70	1	5	4	4	4	0.558403	0.0386231	0.558014	0.558014	0.198155	0.351603	0.986736
	70	1	6	4	4	4	0.558697	0.00629825	0.558403	0.558403	0.192966	0.333834	0.999593
	70	1	7	4	4	4	0.559227	0.00944737	0.558697	0.558697	0.1936	0.335742	0.0936535
	70	1	8	4	4	4	0.559339	0.0224144	0.559227	0.558697	0.195729	0.342866	0.0507046
	70	1	9	1	4	4	-0.187502	0.0548318	0.559339	0.558697	0.0747702	0.0903763	0.00171788
	70	1	10	4	1	4	0.559778	0.130226	-0.187502	0.558697	0.213991	0.477396	0.999984
	70	1	11	4	4	4	0.560724	0.0302872	0.559778	0.559778	0.197347	0.34769	0.97399
	70	1	12	1	4	4	-0.186171	0.015653	0.560724	0.560724	0.0721502	0.0828604	0.00573774
	70	1	13	4	1	4	0.561052	0.0201914	-0.186171	0.560724	0.195777	0.4112	0.877047
	70	1	14	4	4	4	0.561289	0.0418648	0.561052	0.560724	0.199388	0.354141	0.999289
	70	1	15	4	4	4	0.561806	0.0202841	0.561289	0.561289	0.195973	0.3423	0.99994
	70	1	16	1	4	4	-0.184734	0.0396419	0.561806	0.561806	0.0739785	0.08759	0.000158327
	70	1	17	4	1	4	0.562653	0.045014	-0.184734	0.561806	0.20024	0.426524	0.998182
	71	1	1	1	200	200	-0.18971	0.0817846	2.24275	2.24275	0.0764841	0.0126009	0.169217
	71	1	2	1	1	200	-0.18962	0.08586	-0.18971	2.24275	0.076792	0.032631	0.999812
	71	1	3	1	1	1	-0.189083	0.0087064	-0.18962	-0.18962	0.0713766	0.184483	0.395614
	71	1	4	1	1	1	-0.188969	0.0163014	-0.189083	-0.18962	0.0719106	0.187303	0.361368
	71	1	5	4	1	1	0.558062	0.0252856	-0.188969	-0.188969	0.195891	0.572477	0.998227
	71	1	6	1	4	4	-0.187526	0.328991	0.558062	0.558062	0.0969037	0.162839	0.00750801
	71	1	7	4	1	4	0.559536	0.3339	-0.187526	0.558062	0.251477	0.600574	0.999943
	71	1	8	1	4	4	-0.186773	0.0315839	0.559536	0.559536	0.073199	0.0858783	0.00148986
	71	1	9	1	1	4	-0.186068	0.275548	-0.186773	0.559536	0.0923589	0.186733	0.999999
	71	1	10	4	1	1	0.562567	0.0525163	-0.186068	-0.186068	0.201465	0.590355	0.999511
	72	1	1	4	200	200	0.5568	0.00768757	2.24275	2.24275	0.192741	0.0570222	0.011062
	72	1	2	1	4	200	-0.189855	0.0175054	0.5568	2.24275	0.0719037	0.0207897	0.00143179
	72	1	3	4	1	200	0.557064	0.0690955	-0.189855	2.24275	0.202881	0.155399	0.443678
	72	1	4	4	4	200	0.557202	0.0796543	0.557064	2.24275	0.204687	0.123245	0.000611456
	72	1	5	4	4	200	0.557368	0.123557	0.557202	2.24275	0.21222	0.135369	0.147264
	72	1	6	4	4	200	0.557645	0.193208	0.557368	2.24275	0.224586	0.156659	1
	72	1	7	4	4	4	0.56067	0.00546466	0.557645	0.557645	0.1933	0.334614	0.596968
	72	1	8	4	4	4	0.560918	0.0402903	0.56067	0.56067	0.199038	0.353109	1
	73	1	1	7	200	200	0.81377	0.0368624	2.23191	2.23191	0.266731	0.106912	0.345107
	73	1	2	7	7	200	0.814277	0.0641851	0.81377	2.23191	0.272447	0.183336	0.999876
	73	1	3	7	7	7	0.816369	0.027971	0.814277	0.814277	0.265706	0.411104	6.54443e-05
	73	1	4	7	7	7	0.816546	0.0417712	0.816369	0.814277	0.268553	0.419201	6.55603e-05
	73	1	5	4	7	7	0.557256	0.0518667	0.816546	0.814277	0.200061	0.288076	0.000179579
	73	1	6	4	4	7	0.557316	0.063722	0.557256	0.814277	0.202045	0.315814	0.000390429
	73	1	7	4	4	7	0.55741	0.0853022	0.557316	0.814277	0.205691	0.327375	0.00512022
	73	1	8	7	4	7	0.817377	0.0984541	0.55741	0.814277	0.280479	0.479253	1
	74	1	1	7	200	200	0.813571	0.0156526	2.23191	2.23191	0.262404	0.102014	0.00792748
	74	1	2	4	7	200	0.55631	0.0375108	0.813571	2.23191	0.197467	0.103461	0.0204748
	74	1	3	4	4	200	0.556372	0.0431605	0.55631	2.23191	0.19841	0.114695	0.906587
	74	1	4	4	4	4	0.556579	0.00324167	0.556372	0.556372	0.191974	0.331645	0.976542
	74	1	5	4	4	4	0.556872	0.00648334	0.556579	0.556579	0.192564	0.333499	0.0190687
	74	1	6	7	4	4	0.815795	0.0129667	0.556872	0.556579	0.262521	0.481463	0.000863498
	74	1	7	4	7	4	0.557376	0.13967	0.815795	0.556579	0.215021	0.385126	0.0605131
	74	1	8	4	4	4	0.557452	0.145227	0.557376	0.556579	0.216012	0.412923	0.378941
	74	1	9	4	4	4	0.55764	0.0344543	0.557452	0.557452	0.197287	0.349038	0.0173556
	74	1	10	4	4	4	0.557799	0.0722429	0.55764	0.557452	0.203589	0.370396	0.999975
	74	1	11	4	4	4	0.558704	0.0342691	0.557799	0.557799	0.197513	0.349399	0.000346862
	74	1	12	7	4	4	0.82106	0.0386222	0.558704	0.557799	0.269263	0.499767	3.42883e-05
	74	1	13	7	7	4	0.822025	0.13828	0.82106	0.557799	0.290321	0.535295	0.0139249
	74	1	14	7	7	4	0.822246	0.156341	0.822025	0.557799	0.294254	0.546302	1
	75	1	1	4	200	200	0.556273	0.0373255	2.23191	2.23191	0.197428	0.0617627	0.0112075
	75	1	2	4	4	200	0.557073	0.280636	0.556273	2.23191	0.240564	0.18832	0.0221638
	75	1	3	4	4	200	0.557296	0.340931	0.557073	2.23191	0.252205	0.211946	0.999741
	75	1	4	7	4	4	0.820404	0.217285	0.557296	0.557296	0.306915	0.607227	1
	76	1	1	4	200	200	0.557388	0.390668	2.23191	2.23191	0.262056	0.135454	1.3359e-05
	76	1	2	4	4	200	0.557554	0.440219	0.557388	2.23191	0.272137	0.255436	0.998935
	76	1	3	4	4	4	0.558	0.0105586	0.557554	0.557554	0.193488	0.336032	1
	76	1	4	4	4	4	0.561181	0.0304717	0.558	0.558	0.197488	0.34854	0.999998
	77	1	1	1	200	200	-0.189988	0.0602038	2.23126	2.23126	0.074893	0.0121244	0.00476987
	77	1	2	4	1	200	0.556841	0.088546	-0.189988	2.23126	0.206098	0.163028	1.49697e-05
	77	1	3	7	4	200	0.8163	0.174406	0.556841	2.23126	0.29626	0.246499	0.999902
	77	1	4	1	7	7	-0.188814	0.0884533	0.8163	0.8163	0.0770695	0.0722351	0.944633
	77	1	5	1	1	1	-0.188245	0.139488	-0.188814	-0.188814	0.0809732	0.237699	0.0334981
	77	1	6	1	1	1	-0.188195	0.142637	-0.188245	-0.188814	0.0812216	0.239078	0.00154799
	77	1	7	1	1	1	-0.187963	0.213122	-0.188195	-0.188814	0.0868583	0.271947	0.00125096
	77	1	8	1	1	1	-0.187902	0.0142637	-0.187963	-0.187963	0.0718782	0.186639	0.996186
	77	1	9	1	1	1	-0.187531	0.0262118	-0.187902	-0.187902	0.0727451	0.191239	0.0058129
	77	1	10	4	1	1	0.559583	0.0480705	-0.187531	-0.187902	0.199999	0.586561	1
	78	1	1	1	200	200	-0.19013	0.00981786	2.23126	2.23126	0.0713473	0.0107297	0.0042379
	78	1	2	7	1	200	0.815099	0.0473295	-0.19013	2.23126	0.269251	0.243105	0.979207
	78	1	3	7	7	7	0.815836	0.0043532	0.815099	0.815099	0.260812	0.396645	0.000127007
	78	1	4	7	7	7	0.817794	0.207379	0.815836	0.815099	0.303899	0.520377	0.00140364
	78	1	5	1	7	7	-0.188834	0.323156	0.817794	0.815099	0.0962038	0.121511	6.00508e-05
	78	1	6	1	1	7	-0.188716	0.359093	-0.188834	0.815099	0.0995004	0.183627	0.974797
	78	1	7	7	1	1	0.82111	0.117629	-0.188716	-0.188716	0.285656	0.755775	0.000798337
	78	1	8	4	7	1	0.558856	0.144397	0.82111	-0.188716	0.216229	0.546276	1
	79	1	1	1	200	200	-0.190129	0.0100957	2.23126	2.23126	0.0713664	0.010737	0.0022201
	79	1	2	1	1	200	-0.190038	0.0325101	-0.190129	2.23126	0.0729275	0.0290071	0.000399228
	79	1	3	4	1	200	0.557427	0.266842	-0.190038	2.23126	0.238065	0.231789	0.999714
	79	1	4	1	4	4	-0.187653	0.442545	0.557427	0.557427	0.107661	0.204417	0.999967
	79	1	5	1	1	1	-0.186848	0.0453844	-0.187653	-0.187653	0.0741653	0.198803	0.385571
	79	1	6	1	1	1	-0.186626	0.083637	-0.186848	-0.187653	0.0769521	0.214165	0.998682
	79	1	7	1	1	1	-0.186054	0.0743749	-0.186626	-0.186626	0.0763357	0.210435	0.996814
	79	1	8	1	1	1	-0.185644	0.0389936	-0.186054	-0.186054	0.0738379	0.19645	0.0247923
	79	1	9	7	1	1	0.830793	0.173665	-0.185644	-0.186054	0.300715	0.783433	0.999954
	80	1	1	4	200	200	0.557531	0.31695	2.23126	2.23126	0.247622	0.115803	0.999998
	80	1	2	4	4	4	0.558719	0.00583514	0.557531	0.557531	0.192897	0.333837	1
	80	1	3	4	4	4	0.560632	0.0133375	0.558719	0.558719	0.194563	0.338594	2.08128e-06
	80	1	4	4	4	4	0.560651	0.016394	0.560632	0.558719	0.195064	0.340111	0.00197504
	80	1	5	4	4	4	0.560721	0.0287126	0.560651	0.558719	0.197089	0.346943	0.927393
	80	1	6	4	4	4	0.560925	0.0056499	0.560721	0.560721	0.19339	0.333987	0.0012732
	80	1	7	7	4	4	0.828011	0.0558506	0.560925	0.560721	0.274885	0.513498	1
	81	1	1	1	200	200	-0.188422	0.78504	2.2815	2.2815	0.146564	0.0637895	0.025391
	81	1	2	4	1	200	0.558577	0.803193	-0.188422	2.2815	0.352779	0.518226	0.96482
	81	1	3	4	4	4	0.558997	0.0672415	0.558577	0.558577	0.203046	0.367885	0.999999
	81	1	4	4	4	4	0.560452	0.0434384	0.558997	0.558997	0.199445	0.355103	0.0510014
	81	1	5	1	4	4	-0.186484	0.0854875	0.560452	0.558997	0.0771034	0.0968809	0.000131702
	81	1	6	4	1	4	0.560733	0.103548	-0.186484	0.558997	0.209627	0.461529	0.00677843
	81	1	7	4	4	4	0.560862	0.134668	0.560733	0.558997	0.215043	0.407768	0.0362289
	81	1	8	4	4	4	0.562037	0.356028	0.560862	0.560862	0.256534	0.542272	0.984401
	82	1	1	4	200	200	0.55796	0.619993	2.2815	2.2815	0.310612	0.205319	3.98466e-05
	82	1	2	1	4	200	-0.188852	0.626754	0.55796	2.2815	0.127176	0.0837053	0.223144
	82	1	3	1	1	200	-0.188621	0.676953	-0.188852	2.2815	0.133091	0.121919	0.0157935
	82	1	4	1	1	200	-0.188333	0.766979	-0.188621	2.2815	0.14426	0.147603	0.0203013
	82	1	5	4	1	200	0.558775	0.814308	-0.188333	2.2815	0.355477	0.525117	1
	82	1	6	4	4	4	0.560507	0.0387148	0.558775	0.558775	0.198679	0.352553	0.000246791
	82	1	7	1	4	4	-0.186468	0.0852096	0.560507	0.558775	0.0770848	0.0968396	0.00243372
	82	1	8	1	1	4	-0.18641	0.0965091	-0.186468	0.558775	0.0779267	0.129014	0.00621336
	82	1	9	4	1	4	0.56086	0.124295	-0.18641	0.558775	0.213237	0.47428	0.0419831
	82	1	10	4	4	4	0.561052	0.169586	0.56086	0.558775	0.221251	0.428694	0.000140552
	82	1	11	4	4	4	0.561898	0.434476	0.561052	0.558775	0.272269	0.589726	0.998332
	83	1	1	1	200	200	-0.190265	0.128463	2.2815	2.2815	0.0799025	0.0134263	4.11179e-06
	83	1	2	4	1	200	0.556763	0.236179	-0.190265	2.2815	0.232181	0.211167	0.999656
	83	1	3	4	4	4	0.557959	0.214969	0.556763	0.556763	0.228614	0.455124	9.4436e-05
	83	1	4	4	4	4	0.55849	0.375663	0.557959	0.556763	0.259388	0.553285	0.998707
	83	1	5	4	4	4	0.558919	0.00611286	0.55849	0.55849	0.192989	0.333824	0.00823699
	83	1	6	1	4	4	-0.186856	0.415212	0.558919	0.55849	0.105089	0.19381	0.999969
	83	1	7	1	1	1	-0.186129	0.0150043	-0.186856	-0.186856	0.0721096	0.18733	0.0305376
	83	1	8	1	1	1	-0.186077	0.0208393	-0.186129	-0.186856	0.0725197	0.189488	0.00643014
	83	1	9	4	1	1	0.561197	0.036955	-0.186077	-0.186856	0.198556	0.580506	0.999997
	84	1	1	4	200	200	0.558573	0.814956	2.2815	2.2815	0.35556	0.294231	0.000560653
	84	1	2	1	4	200	-0.187052	1.26647	0.558573	2.2815	0.220664	0.304947	0.00016428
	84	1	3	4	1	200	0.5601	1.2862	-0.187052	2.2815	0.473779	0.778637	0.917888
	85	1	1	1	200	200	-0.190469	0.00296388	2.28109	2.28109	0.070845	0.0099121	0.0710331
	85	1	2	1	1	200	-0.190026	0.136709	-0.190469	2.28109	0.0805586	0.0356229	2.96572e-05
	85	1	3	1	1	200	-0.189569	0.293424	-0.190026	2.28109	0.0934683	0.0514579	0.000740007
	85	1	4	1	1	200	-0.188305	0.736154	-0.189569	2.28109	0.140374	0.138459	0.0141817
	85	1	5	1	1	200	-0.187974	0.841187	-0.188305	2.28109	0.154067	0.172089	0.0012055
	85	1	6	1	1	200	-0.187542	0.987251	-0.187974	2.28109	0.174894	0.229235	0.00496466
	85	1	7	1	1	200	-0.187136	1.12109	-0.187542	2.28109	0.195873	0.292268	0.000134558
	85	1	8	1	1	200	-0.185042	1.86965	-0.187136	2.28109	0.346399	0.721492	0.000191561
	85	1	9	1	1	200	-0.185002	1.87827	-0.185042	2.28109	0.348433	0.725561	0.0100588
	86	1	1	1	200	200	-0.190406	0.0253782	2.28109	2.28109	0.0723927	0.0104666	0.303654
	86	1	2	1	1	200	-0.188129	0.798396	-0.190406	2.28109	0.148357	0.157743	0.010994
	86	1	3	1	1	200	-0.188058	0.812381	-0.188129	2.28109	0.150207	0.162242	1
	86	1	4	1	1	1	-0.186057	0.0785429	-0.188058	-0.188058	0.0766399	0.212435	0.021607
	86	1	5	1	1	1	-0.18599	0.0860452	-0.186057	-0.188058	0.077198	0.215414	0.00961154
	86	1	6	1	1	1	-0.185929	0.0936401	-0.18599	-0.188058	0.0777661	0.218591	0.966842
	86	1	7	1	1	1	-0.185687	0.0121334	-0.185929	-0.185929	0.0719561	0.186243	0.00241924
	86	1	8	1	1	1	-0.185214	0.173387	-0.185687	-0.185929	0.0839747	0.253684	0.997938
	87	1	1	1	200	200	-0.190456	0.00759495	2.28109	2.28109	0.0711623	0.0100242	0.183271
	87	1	2	1	1	200	-0.188705	0.60139	-0.190456	2.28109	0.124316	0.103543	2.84343e-05
	88	1	1	1	200	200	-0.189737	0.263693	2.28109	2.28109	0.0908742	0.0186261	0.00224725
	88	1	2	1	1	200	-0.188151	0.819513	-0.189737	2.28109	0.151133	0.164686	0.986816
	88	1	3	1	1	1	-0.187865	0.0199136	-0.188151	-0.188151	0.0722728	0.188795	0.000433592
	88	1	4	1	1	1	-0.187784	0.0424206	-0.187865	-0.188151	0.0738577	0.197386	0.316684
	88	1	5	1	1	1	-0.187229	0.206638	-0.187784	-0.188151	0.086416	0.26901	0.00141343
	88	1	6	1	1	1	-0.186832	0.338994	-0.187229	-0.188151	0.0979062	0.337355	0.0015394
	88	1	7	1	1	1	-0.186523	0.442359	-0.186832	-0.188151	0.107808	0.396126	0.0193818
	88	1	8	1	1	1	-0.186449	0.45051	-0.186523	-0.188151	0.108632	0.400918	0.999999
	88	1	9	1	1	1	-0.185177	0.0069466	-0.186449	-0.186449	0.0716503	0.184603	0.498438
	88	1	10	1	1	1	-0.18498	0.0346404	-0.185177	-0.186449	0.0735994	0.195015	0.014159
	88	1	11	1	1	1	-0.18492	0.0440877	-0.18498	-0.186449	0.0742747	0.198679	0.0147194
	89	1	1	4	200	200	0.556636	0.162361	2.2711	2.2711	0.218816	0.0784854	0.00324884
	89	1	2	7	4	200	0.818376	0.524687	0.556636	2.2711	0.377603	0.42809	0.00422251
	89	1	3	7	7	200	0.820238	0.715853	0.818376	2.2711	0.425755	0.519722	0.00137542
	89	1	4	7	7	200	0.821157	0.806157	0.820238	2.2711	0.449078	0.574755	1
	90	1	1	4	200	200	0.556829	0.223768	2.2711	2.2711	0.229918	0.0901005	0.000127472
	90	1	2	4	4	200	0.556977	0.263501	0.556829	2.2711	0.237315	0.17697	3.43106e-05
	90	1	3	7	4	200	0.816923	0.370384	0.556977	2.2711	0.340395	0.338339	4.58358e-05
	90	1	4	4	7	200	0.557528	0.426511	0.816923	2.2711	0.26933	0.224483	6.72416e-05
	90	1	5	7	4	200	0.81952	0.639906	0.557528	2.2711	0.406409	0.498643	7.54975e-05
	90	1	6	7	7	200	0.819875	0.672415	0.81952	2.2711	0.414676	0.492837	1
	90	1	7	7	7	7	0.831614	0.0280636	0.819875	0.819875	0.270274	0.418063	0.039839
	91	1	1	4	200	200	0.556159	0.0114848	2.2711	2.2711	0.1932	0.0555472	0.000240822
	91	1	2	7	4	200	0.813585	0.0217655	0.556159	2.2711	0.263633	0.177828	0.0291721
	91	1	3	7	7	200	0.815791	0.243588	0.813585	2.2711	0.311226	0.252553	0.99982
	91	1	4	7	7	7	0.818522	0.11068	0.815791	0.815791	0.283391	0.461594	2.99795e-05
	91	1	5	7	7	7	0.818728	0.127814	0.818522	0.815791	0.287068	0.471879	1
	91	1	6	4	7	7	0.560131	0.0175976	0.818728	0.818728	0.195135	0.271585	0.00218931
	91	1	7	4	4	7	0.560172	0.0212098	0.560131	0.818728	0.195732	0.29413	0.000697104
	91	1	8	7	4	7	0.825417	0.0281562	0.560172	0.818728	0.268438	0.439978	1
	91	1	9	4	7	7	0.562249	0.0388074	0.825417	0.825417	0.199116	0.281271	0.000678617
	91	1	10	7	4	7	0.831583	0.0593689	0.562249	0.825417	0.276697	0.460805	0.145376
	92	1	1	7	200	200	0.813512	0.0197279	2.2711	2.2711	0.263203	0.0984661	0.0199483
	92	1	2	7	7	200	0.814419	0.102252	0.813512	2.2711	0.280364	0.192473	0.0135307
	92	1	3	4	7	200	0.55791	0.541081	0.814419	2.2711	0.293395	0.277374	0.999998
	92	1	4	7	4	4	0.822483	0.0349174	0.55791	0.55791	0.268935	0.498383	1
	92	1	5	7	7	7	0.831162	0.0346396	0.822483	0.822483	0.271481	0.420928	0.971809
	93	1	1	1	200	200	-0.189189	0.459865	2.27069	2.27069	0.109166	0.0301753	0.000210246
	93	1	2	1	1	200	-0.188932	0.544613	-0.189189	2.27069	0.118028	0.0919979	0.00258875
	93	1	3	1	1	200	-0.188879	0.553968	-0.188932	2.27069	0.119047	0.0939297	0.688287
	93	1	4	7	1	200	0.820027	0.645756	-0.188879	2.27069	0.408055	0.575798	0.00444608
	93	1	5	4	7	200	0.558645	0.718741	0.820027	2.27069	0.333124	0.372152	1
	93	1	6	4	4	4	0.561978	0.0338068	0.558645	0.558645	0.198227	0.350633	0.000499483
	93	1	7	4	4	4	0.562018	0.0409386	0.561978	0.558645	0.199412	0.354336	0.214903
	93	1	8	7	4	4	0.831164	0.0677988	0.562018	0.558645	0.278317	0.522966	0.0291924
	94	1	1	7	200	200	0.814196	0.0779871	2.27069	2.27069	0.275261	0.112073	5.69003e-05
	94	1	2	7	7	200	0.814611	0.117259	0.814196	2.27069	0.283565	0.198328	0.0028525
	94	1	3	7	7	200	0.820351	0.715222	0.814611	2.27069	0.425637	0.519859	1
	94	1	4	1	7	7	-0.185442	0.0187095	0.820351	0.820351	0.0724366	0.0617609	0.00040407
	94	1	5	4	1	7	0.561902	0.0372338	-0.185442	0.820351	0.198773	0.368474	0.0312929
	94	1	6	7	4	7	0.830492	0.0433468	0.561902	0.820351	0.273064	0.451565	0.138309
	94	1	7	7	7	7	0.831511	0.137635	0.830492	0.820351	0.293164	0.483136	0.834105
	95	1	1	1	200	200	-0.189923	0.198487	2.27069	2.27069	0.0854321	0.0161219	0.0106918
	95	1	2	1	1	200	-0.189856	0.206453	-0.189923	2.27069	0.086086	0.042341	0.0177076
	95	1	3	1	1	200	-0.189502	0.319358	-0.189856	2.27069	0.0957748	0.0551127	0.220064
	95	1	4	1	1	200	-0.189415	0.330936	-0.189502	2.27069	0.0968284	0.0566099	0.376782
	95	1	5	7	1	200	0.817797	0.390584	-0.189415	2.27069	0.345402	0.419756	1
	95	1	6	7	7	7	0.829428	0.0100031	0.817797	0.817797	0.265956	0.406754	0.999983
	96	1	1	4	200	200	0.557502	0.422816	2.27069	2.27069	0.268571	0.139037	0.0332539
	96	1	2	1	4	200	-0.189186	0.447639	0.557502	2.27069	0.107943	0.0561156	0.000152113
	96	1	3	1	1	200	-0.189071	0.482927	-0.189186	2.27069	0.111526	0.0801188	0.000789828
	96	1	4	1	1	200	-0.189026	0.490059	-0.189071	2.27069	0.112265	0.0814187	0.000746211
	96	1	5	1	1	200	-0.188886	0.531832	-0.189026	2.27069	0.116666	0.0894221	0.000510012
	96	1	6	1	1	200	-0.188545	0.646126	-0.188886	2.27069	0.129469	0.115034	0.0180625
	96	1	7	7	1	200	0.820102	0.654647	-0.188545	2.27069	0.410306	0.581113	1
	96	1	8	4	7	7	0.561305	0.0888238	0.820102	0.820102	0.207258	0.30761	0.116183
	96	1	9	7	4	7	0.829014	0.119111	0.561305	0.820102	0.28843	0.497009	0.999993
	97	1	1	7	200	200	0.817769	0.383999	2.26042	2.26042	0.343854	0.214199	1
	97	1	2	7	7	7	0.822394	0.0190795	0.817769	0.817769	0.2657	0.408173	1
	97	1	3	7	7	7	0.83255	0.0374181	0.822394	0.822394	0.272468	0.423401	3.79814e-05
	98	1	1	7	200	200	0.821122	0.745306	2.26042	2.26042	0.433549	0.3994	1
	98	1	2	7	7	7	0.829533	0.00639072	0.821122	0.821122	0.265258	0.403678	0.999995
	99	1	1	7	200	200	0.814366	0.0200057	2.26042	2.26042	0.26351	0.0999018	0.0442946
	99	1	2	7	7	200	0.817407	0.328427	0.814366	2.26042	0.330884	0.296331	0.998157
	99	1	3	7	7	7	0.819764	0.135965	0.817407	0.817407	0.28912	0.477216	1
	99	1	4	7	7	7	0.829428	0.0328798	0.819764	0.819764	0.270601	0.419727	0.0208055
	99	1	5	7	7	7	0.830357	0.123091	0.829428	0.819764	0.289695	0.473816	0.00119747
	99	1	6	7	7	7	0.83188	0.283322	0.830357	0.819764	0.325452	0.572092	7.50952e-05
	99	1	7	7	7	7	0.832347	0.331854	0.83188	0.819764	0.336725	0.600998	0.603662
	100	1	1	7	200	200	0.816943	0.295362	2.26042	2.26042	0.323202	0.179669	1
	100	1	2	7	7	7	0.823967	0.0229695	0.816943	0.816943	0.266954	0.411611	0.999997
	100	1	3	7	7	7	0.827448	0.0208393	0.823967	0.823967	0.267559	0.410176	1
	101	1	1	4	200	200	0.558118	0.537481	2.25997	2.25997	0.29269	0.178307	0.947254
	101	1	2	4	4	4	0.558778	0.151065	0.558118	0.558118	0.21738	0.416748	1
	101	1	3	4	4	4	0.561373	0.00509417	0.558778	0.558778	0.193406	0.334459	0.993156
	101	1	4	4	4	4	0.561724	0.0179685	0.561373	0.561373	0.195576	0.340959	0.996499
	101	1	5	4	4	4	0.562228	0.0558506	0.561724	0.561724	0.201937	0.362252	0.0358771
	102	1	1	7	200	200	0.817532	0.353536	2.25997	2.25997	0.3367	0.201923	0.997648
	102	1	2	4	7	7	0.558065	0.05724	0.817532	0.817532	0.201149	0.29051	0.141418
	102	1	3	4	4	7	0.558273	0.0953999	0.558065	0.817532	0.207618	0.332598	1
	102	1	4	4	4	4	0.560747	0.0437173	0.558273	0.558273	0.199562	0.355624	0.999999
	102	1	5	4	4	4	0.562439	0.0933623	0.560747	0.560747	0.208315	0.384118	0.989067
	103	1	1	4	200	200	0.556809	0.12189	2.25997	2.25997	0.21179	0.0725773	0.999499
	103	1	2	4	4	4	0.55752	0.0711332	0.556809	0.556809	0.203334	0.369818	0.000472618
	103	1	3	4	4	4	0.558199	0.277679	0.55752	0.556809	0.240319	0.493417	0.00126081
	103	1	4	7	4	4	0.819762	0.298889	0.558199	0.556809	0.32494	0.653375	0.999806
	103	1	5	7	7	7	0.821496	0.0074097	0.819762	0.819762	0.263087	0.400192	0.218801
	103	1	6	7	7	7	0.821801	0.0069466	0.821496	0.821496	0.263084	0.399568	1
	103	1	7	7	7	7	0.829441	0.135505	0.821801	0.821801	0.292056	0.481179	0.994875
	103	1	8	4	7	7	0.561996	0.0254709	0.829441	0.829441	0.196865	0.2736	0.0095525
	103	1	9	7	4	7	0.832058	0.177185	0.561996	0.829441	0.301887	0.532183	0.970078
	104	1	1	7	200	200	0.814692	0.0497376	2.25997	2.25997	0.269619	0.106762	0.999996
	104	1	2	7	7	7	0.817927	0.00611301	0.814692	0.814692	0.261777	0.398965	0.999991
	104	1	3	7	7	7	0.820879	0.0142637	0.817927	0.817927	0.264281	0.404432	1
	104	1	4	7	7	7	0.826821	0.00611301	0.820879	0.820879	0.2644	0.40207	0.986802
	104	1	5	4	7	7	0.560987	0.0101883	0.826821	0.826821	0.194138	0.266415	0.0048576
	104	1	6	4	4	7	0.561039	0.0174128	0.560987	0.826821	0.195322	0.291115	0.000822122
	104	1	7	7	4	7	0.828236	0.0564064	0.561039	0.826821	0.275068	0.45689	0.0784442
	104	1	8	7	7	7	0.832219	0.420408	0.828236	0.828236	0.357431	0.650254	0.891806
	105	1	1	1	200	200	-0.190505	0.0108364	2.24957	2.24957	0.0713793	0.0105054	0.0177505
	105	1	2	1	1	200	-0.190201	0.107994	-0.190505	2.24957	0.078367	0.0341563	0.00016904
	105	1	3	1	1	200	-0.188635	0.657318	-0.190201	2.24957	0.130763	0.119785	0.00202064
	105	1	4	7	1	200	0.820045	0.695199	-0.188635	2.24957	0.42047	0.609361	0.00281835
	105	1	5	7	7	200	0.820933	0.782169	0.820045	2.24957	0.442864	0.564795	1
	105	1	6	1	7	7	-0.185565	0.048625	0.820933	0.820933	0.0745302	0.0660781	8.95093e-05
	105	1	7	7	1	7	0.829798	0.0553862	-0.185565	0.820933	0.275332	0.532092	0.778878
	105	1	8	1	7	7	-0.185379	0.0702979	0.829798	0.820933	0.076111	0.0692286	0.004845
	106	1	1	7	200	200	0.81799	0.503292	2.24957	2.24957	0.372279	0.270165	1.02648e-05
	106	1	2	1	7	200	-0.186718	1.35835	0.81799	2.24957	0.23753	0.337736	0.0029527
	106	1	3	7	1	200	0.826142	1.37215	-0.186718	2.24957	0.595937	0.892294	1
	107	1	1	1	200	200	-0.189352	0.421047	2.24957	2.24957	0.105299	0.0282244	0.000503192
	107	1	2	7	1	200	0.817382	0.428178	-0.189352	2.24957	0.354101	0.44655	1
	107	1	3	7	7	7	0.826357	0.0185238	0.817382	0.817382	0.266765	0.410191	0.0983664
	107	1	4	7	7	7	0.826783	0.0416786	0.826357	0.817382	0.271604	0.42334	0.000967431
	107	1	5	1	7	7	-0.186294	0.091693	0.826783	0.817382	0.0775821	0.0728215	1.19928e-05
	107	1	6	7	1	7	0.827943	0.157267	-0.186294	0.817382	0.296256	0.593112	0.999993
	107	1	7	7	7	7	0.831011	0.0245441	0.827943	0.827943	0.269376	0.413172	0.124453
	107	1	8	7	7	7	0.831497	0.0448277	0.831011	0.827943	0.273672	0.425234	0.0760896
	108	1	1	7	200	200	0.816257	0.317406	2.24957	2.24957	0.327979	0.189596	0.00487825
	108	1	2	7	7	200	0.816821	0.364827	0.816257	2.24957	0.339071	0.316791	0.998479
	108	1	3	7	7	7	0.819071	0.119386	0.816821	0.816821	0.285394	0.466889	0.000314919
	108	1	4	7	7	7	0.820386	0.254332	0.819071	0.816821	0.315119	0.549762	1
	108	1	5	7	7	7	0.83076	0.00694644	0.820386	0.820386	0.265734	0.404915	0.00430933
	108	1	6	7	7	7	0.8311	0.0351027	0.83076	0.820386	0.271557	0.42081	0.962747
	109	1	1	7	200	200	0.81445	0.0903984	2.24913	2.24913	0.277907	0.117978	0.155883
	109	1	2	7	7	200	0.814743	0.0969745	0.81445	2.24913	0.279363	0.193462	0.000295214
	109	1	3	7	7	200	0.817006	0.331955	0.814743	2.24913	0.331556	0.299941	0.999029
	109	1	4	7	7	7	0.818535	0.0287126	0.817006	0.817006	0.2665	0.411934	0.0230509
	109	1	5	7	7	7	0.821154	0.297778	0.818535	0.817006	0.325152	0.57636	1
	110	1	1	7	200	200	0.816323	0.290368	2.24913	2.24913	0.321867	0.179743	0.000432971
	110	1	2	7	7	200	0.818219	0.486632	0.816323	2.24913	0.368343	0.385344	0.446777
	110	1	3	7	7	7	0.81986	0.148194	0.818219	0.818219	0.291757	0.484487	4.54577e-05
	110	1	4	7	7	7	0.821422	0.311856	0.81986	0.818219	0.328445	0.584519	0.000963648
	110	1	5	7	7	7	0.821664	0.330843	0.821422	0.818219	0.332873	0.595742	1
	110	1	6	7	7	7	0.831802	0.0666873	0.821664	0.821664	0.278282	0.440771	0.183736
	111	1	1	7	200	200	0.818627	0.537574	2.24913	2.24913	0.38083	0.287435	0.993585
	111	1	2	7	7	7	0.819976	0.0516827	0.818627	0.818627	0.271603	0.425935	1
	111	1	3	7	7	7	0.830021	0.177277	0.819976	0.819976	0.301254	0.507631	0.00155223
	111	1	4	7	7	7	0.830305	0.199321	0.830021	0.819976	0.306167	0.520277	0.999855
	112	1	1	7	200	200	0.814586	0.104847	2.24913	2.24913	0.280957	0.12174	0.999821
	112	1	2	7	7	7	0.816386	0.00898427	0.814586	0.814586	0.261898	0.399821	0.00658398
	112	1	3	7	7	7	0.817444	0.110775	0.816386	0.814586	0.283078	0.461227	0.000312845
	112	1	4	7	7	7	0.818223	0.187373	0.817444	0.814586	0.299677	0.508352	0.999979
	112	1	5	7	7	7	0.823416	0.300093	0.818223	0.818223	0.326434	0.578802	0.999994
	112	1	6	7	7	7	0.826638	0.0291757	0.823416	0.823416	0.26901	0.414831	1
	113	1	1	4	200	200	0.556759	0.0832646	2.23816	2.23816	0.205185	0.0681781	0.989531
	113	1	2	4	4	4	0.5592	0.685937	0.556759	0.556759	0.325816	0.726164	1
	114	1	1	4	200	200	0.55737	0.276839	2.23816	2.23816	0.23993	0.105272	0.00938664
	114	1	2	1	4	200	-0.188947	0.42929	0.55737	2.23816	0.106164	0.055257	0.19252
	114	1	3	4	1	200	0.558048	0.456149	-0.188947	2.23816	0.275563	0.323011	0.00318853
	114	1	4	4	4	200	0.559858	1.02279	0.558048	2.23816	0.406663	0.587906	1
	115	1	1	1	200	200	-0.190037	0.0540896	2.23816	2.23816	0.074451	0.0118434	0.000745336
	115	1	2	1	1	200	-0.18994	0.0797451	-0.190037	2.23816	0.0763106	0.0322659	0.00254598
	115	1	3	4	1	200	0.556855	0.0913225	-0.18994	2.23816	0.206572	0.163148	0.000245011
	115	1	4	1	4	200	-0.189009	0.391779	0.556855	2.23816	0.10253	0.0506596	0.388593
	115	1	5	4	1	1	0.558369	0.148746	-0.189009	-0.189009	0.216866	0.644467	0.00955136
	115	1	6	1	4	1	-0.187759	0.40632	0.558369	-0.189009	0.104099	0.308614	0.999996
	115	1	7	1	1	1	-0.186772	0.0214876	-0.187759	-0.187759	0.0724938	0.189701	4.96655e-05
	115	1	8	1	1	1	-0.186728	0.0317684	-0.186772	-0.187759	0.0732165	0.193553	6.03736e-05
	115	1	9	4	1	1	0.560597	0.0953977	-0.186728	-0.187759	0.2082	0.614788	1
	116	1	1	4	200	200	0.557998	0.476525	2.23816	2.23816	0.279774	0.161119	1
	116	1	2	4	4	4	0.560957	0.0530708	0.557998	0.557998	0.201163	0.361078	0.00825181
	116	1	3	4	4	4	0.562322	0.480508	0.560957	0.557998	0.281934	0.617075	0.000127114
	116	1	4	1	4	4	-0.184961	0.487177	0.562322	0.557998	0.112585	0.223415	0.00494561
	116	1	5	4	1	4	0.562637	0.5672	-0.184961	0.557998	0.300536	0.728087	0.000519657
	117	1	1	4	200	200	0.556889	0.150047	2.23803	2.23803	0.216712	0.0793544	0.479392
	117	1	2	4	4	200	0.558731	0.697809	0.556889	2.23803	0.328361	0.39129	1
	117	1	3	4	4	4	0.562562	0.0322322	0.558731	0.558731	0.19811	0.350041	0.827444
	118	1	1	4	200	200	0.557507	0.346126	2.23803	2.23803	0.25328	0.122394	7.78114e-05
	118	1	2	4	4	200	0.557544	0.352331	0.557507	2.23803	0.254507	0.21582	0.998466
	118	1	3	4	4	4	0.558769	0.26712	0.557544	0.557544	0.238488	0.487132	0.00504865
	118	1	4	4	4	4	0.559763	0.569899	0.558769	0.557544	0.300204	0.666227	1
	119	1	1	4	200	200	0.556929	0.162736	2.23803	2.23803	0.218959	0.0816594	1.05153e-05
	119	1	2	4	4	200	0.557718	0.409849	0.556929	2.23803	0.266009	0.240703	0.000337139
	119	1	3	4	4	200	0.557804	0.430319	0.557718	2.23803	0.270188	0.249954	0.000163574
	119	1	4	4	4	200	0.558446	0.628158	0.557804	2.23803	0.312582	0.351298	0.000845193
	119	1	5	4	4	200	0.558606	0.669837	0.558446	2.23803	0.321972	0.374903	0.000495595
	119	1	6	4	4	200	0.558711	0.695216	0.558606	2.23803	0.327763	0.389607	0.000860253
	119	1	7	4	4	200	0.558758	0.703088	0.558711	2.23803	0.329576	0.394214	0.00029172
	119	1	8	4	4	200	0.558834	0.720594	0.558758	2.23803	0.333614	0.404526	0.000174628
	119	1	9	4	4	200	0.559513	0.930937	0.558834	2.23803	0.383835	0.532346	2.80021e-05
	119	1	10	4	4	200	0.559613	0.95789	0.559513	2.23803	0.390484	0.548714	0.00101792
	119	1	11	4	4	200	0.559985	1.06829	0.559613	2.23803	0.418113	0.614539	0.000539633
	119	1	12	4	4	200	0.56017	1.12016	0.559985	2.23803	0.431288	0.644196	8.51366e-05
	119	1	13	4	4	200	0.56057	1.24261	0.56017	2.23803	0.462731	0.709731	0.00762045
	119	1	14	4	4	200	0.560729	1.28281	0.56057	2.23803	0.473142	0.729609	1
	120	1	1	4	200	200	0.556525	0.0345477	2.23803	2.23803	0.197034	0.0609625	0.0442995
	120	1	2	4	4	200	0.556628	0.0522384	0.556525	2.23803	0.199969	0.11648	0.999963
	120	1	3	4	4	4	0.557542	0.051127	0.556628	0.556628	0.200008	0.358548	1
	120	1	4	4	4	4	0.559504	0.0627972	0.557542	0.557542	0.202428	0.365935	0.0134801
	120	1	5	4	4	4	0.559597	0.0799322	0.559504	0.557542	0.205327	0.375584	0.999767
	120	1	6	4	4	4	0.560177	0.0106515	0.559597	0.559597	0.19402	0.336641	0.0186273
	120	1	7	4	4	4	0.560383	0.0624268	0.560177	0.559597	0.202582	0.365547	0.999999
	120	1	8	4	4	4	0.561844	0.0225996	0.560383	0.560383	0.196359	0.343852	0.00305719
	120	1	9	4	4	4	0.56196	0.0452918	0.561844	0.560383	0.200118	0.356415	0.999957
	121	1	1	4	200	200	0.558045	0.49903	2.29871	2.29871	0.284503	0.158327	0.998429
	121	1	2	4	4	4	0.558448	0.00583499	0.558045	0.558045	0.192833	0.333553	0.00101994
	121	1	3	4	4	4	0.559054	0.190702	0.558448	0.558045	0.224508	0.440635	0.00130716
	121	1	4	4	4	4	0.55976	0.406319	0.559054	0.558045	0.265902	0.572089	1
	121	1	5	4	4	4	0.561578	0.0145412	0.55976	0.55976	0.194984	0.339454	0.998035
	121	1	6	4	4	4	0.561978	0.00629808	0.561578	0.561578	0.193745	0.334646	0.0638914
	121	1	7	1	4	4	-0.184753	0.184589	0.561978	0.561578	0.0849247	0.120396	0.000597543
	121	1	8	1	1	4	-0.184673	0.205151	-0.184753	0.561578	0.0866016	0.162067	0.00196226
	121	1	9	4	1	4	0.562731	0.210615	-0.184673	0.561578	0.2291	0.527346	0.00644953
	122	1	1	1	200	200	-0.189547	0.2359	2.29871	2.29871	0.0885504	0.0170557	0.0183513
	122	1	2	1	1	200	-0.189468	0.249608	-0.189547	2.29871	0.0897111	0.0458051	0.0155374
	122	1	3	4	1	200	0.557559	0.317034	-0.189468	2.29871	0.247647	0.243549	0.999998
	122	1	4	4	4	4	0.559092	0.0905812	0.557559	0.557559	0.207004	0.381615	1
	122	1	5	4	4	4	0.561379	0.0169492	0.559092	0.559092	0.195328	0.340861	0.000300415
	122	1	6	4	4	4	0.561563	0.0691863	0.561379	0.559092	0.204005	0.370022	0.000257355
	122	1	7	4	4	4	0.562006	0.20265	0.561563	0.559092	0.227454	0.449025	0.998733
	123	1	1	1	200	200	-0.189523	0.244328	2.29871	2.29871	0.0892594	0.0174058	0.0147416
	123	1	2	1	1	200	-0.18824	0.681026	-0.189523	2.29871	0.133645	0.121527	0.00359084
	123	1	3	4	1	200	0.5592	0.835237	-0.18824	2.29871	0.360601	0.534427	0.00204519
	123	1	4	4	4	200	0.559464	0.910073	0.5592	2.29871	0.378727	0.506526	0.999999
	123	1	5	4	4	4	0.560791	0.00370475	0.559464	0.559464	0.193044	0.33321	0.00197628
	123	1	6	4	4	4	0.561383	0.183293	0.560791	0.559464	0.223791	0.436977	0.999992
	124	1	1	1	200	200	-0.189507	0.250071	2.29871	2.29871	0.0897454	0.0176484	0.958605
	124	1	2	1	1	1	-0.189303	0.00666856	-0.189507	-0.189507	0.0712149	0.183636	1.12165e-05
	124	1	3	1	1	1	-0.188746	0.201539	-0.189303	-0.189507	0.0858194	0.266219	0.999392
	124	1	4	4	1	1	0.558638	0.0163009	-0.188746	-0.188746	0.194568	0.567348	0.0323584
	124	1	5	4	4	1	0.558986	0.108364	0.558638	-0.188746	0.210012	0.550226	1
	124	1	6	4	4	4	0.560622	0.0263037	0.558986	0.558986	0.196671	0.345654	8.95915e-05
	124	1	7	4	4	4	0.560853	0.0946564	0.560622	0.558986	0.208138	0.384364	0.999584
	125	1	1	7	200	200	0.816118	0.151713	2.29831	2.29831	0.291333	0.127913	0.0107206
	125	1	2	7	7	200	0.816331	0.164958	0.816118	2.29831	0.294236	0.214069	0.98018
	125	1	3	7	7	7	0.817372	0.0400123	0.816331	0.816331	0.268443	0.418196	0.0105807
	125	1	4	7	7	7	0.817545	0.0467736	0.817372	0.816331	0.26987	0.422224	0.999964
	125	1	5	7	7	7	0.81995	0.018339	0.817545	0.817545	0.264826	0.406431	0.999995
	125	1	6	7	7	7	0.82328	0.0263044	0.81995	0.81995	0.267425	0.412287	0.00965735
	125	1	7	7	7	7	0.82367	0.0560357	0.82328	0.81995	0.273609	0.429918	0.00298572
	125	1	8	1	7	7	-0.187172	0.131337	0.82367	0.81995	0.0804687	0.0794272	9.04564e-05
	125	1	9	7	1	7	0.824523	0.134856	-0.187172	0.81995	0.290374	0.577421	0.999856
	125	1	10	7	7	7	0.828202	0.213491	0.824523	0.824523	0.308606	0.527271	0.98808
	125	1	11	7	7	7	0.82985	0.0978078	0.828202	0.828202	0.284188	0.456451	0.000937833
	125	1	12	7	7	7	0.830006	0.108089	0.82985	0.828202	0.286404	0.462627	0.334896
	125	1	13	7	7	7	0.830307	0.00981783	0.830006	0.830006	0.26618	0.403446	0.00244781
	125	1	14	7	7	7	0.830468	0.0185242	0.830307	0.830006	0.26799	0.408645	0.999989
	126	1	1	7	200	200	0.816346	0.176165	2.29831	2.29831	0.296654	0.134799	0.0598742
	126	1	2	7	7	200	0.81768	0.30639	0.816346	2.29831	0.325948	0.278589	0.999495
	126	1	3	7	7	7	0.820441	0.14773	0.81768	0.81768	0.29184	0.484711	0.106901
	126	1	4	7	7	7	0.820983	0.0409385	0.820441	0.820441	0.269711	0.419537	0.123998
	126	1	5	7	7	7	0.822423	0.180333	0.820983	0.820441	0.29949	0.504881	0.999993
	126	1	6	1	7	7	-0.186884	0.00592774	0.822423	0.822423	0.0714078	0.0596385	2.58493e-05
	126	1	7	7	1	7	0.825485	0.0130596	-0.186884	0.822423	0.265403	0.503547	0.00221125
	126	1	8	1	7	7	-0.186388	0.170515	0.825485	0.822423	0.0836096	0.0866442	3.8893e-05
	126	1	9	7	1	7	0.827909	0.266378	-0.186388	0.822423	0.3203	0.654627	1
	127	1	1	7	200	200	0.814768	0.00759492	2.29831	2.29831	0.261145	0.0931891	0.00197317
	127	1	2	1	7	200	-0.189308	0.276752	0.814768	2.29831	0.0920507	0.0333604	0.00116936
	127	1	3	1	1	200	-0.18899	0.381599	-0.189308	2.29831	0.101568	0.0622595	0.00066103
	127	1	4	7	1	200	0.818571	0.389934	-0.18899	2.29831	0.345516	0.413997	0.998475
	127	1	5	7	7	7	0.821356	0.17811	0.818571	0.818571	0.298668	0.503541	1
	128	1	1	7	200	200	0.816626	0.206082	2.29831	2.29831	0.30324	0.143646	0.000294223
	128	1	2	7	7	200	0.816758	0.213121	0.816626	2.29831	0.304823	0.234705	0.913821
	128	1	3	7	7	7	0.818557	0.14736	0.816758	0.816758	0.291169	0.483678	0.999973
	128	1	4	1	7	7	-0.188215	0.0121334	0.818557	0.818557	0.0716998	0.0605956	0.000181463
	128	1	5	7	1	7	0.821537	0.0640011	-0.188215	0.818557	0.274603	0.533323	0.999997
	128	1	6	7	7	7	0.825123	0.0203766	0.821537	0.821537	0.266773	0.409332	0.126427
	128	1	7	7	7	7	0.825605	0.0491818	0.825123	0.821537	0.272786	0.426402	1
	128	1	8	7	7	7	0.830208	0.0323247	0.825605	0.825605	0.270721	0.418054	0.99588
	128	1	9	7	7	7	0.831962	0.0914169	0.830208	0.830208	0.283497	0.453168	7.19094e-05
	129	1	1	7	200	200	0.814224	0.238772	2.28891	2.28891	0.309649	0.154579	0.00123142
	129	1	2	7	7	200	0.81473	0.284804	0.814224	2.28891	0.320085	0.268504	0.00857673
	129	1	3	4	7	200	0.556747	0.320833	0.81473	2.28891	0.248149	0.180265	1
	129	1	4	7	4	4	0.823079	0.0528855	0.556747	0.556747	0.272784	0.510084	0.00491435
	129	1	5	7	7	4	0.823274	0.0641851	0.823079	0.556747	0.275168	0.490785	0.999995
	129	1	6	4	7	7	0.560593	0.0212098	0.823274	0.823274	0.195833	0.272419	0.999857
	129	1	7	4	4	4	0.561247	0.0166714	0.560593	0.560593	0.195251	0.340217	0.00779746
	129	1	8	7	4	4	0.828996	0.0700201	0.561247	0.560593	0.278117	0.522722	0.997635
	130	1	1	7	200	200	0.813006	0.109291	2.28891	2.28891	0.2814	0.117246	0.202012
	130	1	2	7	7	200	0.813721	0.160972	0.813006	2.28891	0.292559	0.212976	0.00763565
	130	1	3	4	7	200	0.556312	0.168382	0.813721	2.28891	0.219798	0.131452	0.00506633
	130	1	4	4	4	200	0.556454	0.204688	0.556312	2.28891	0.226343	0.154827	0.000817856
	130	1	5	4	4	200	0.556706	0.275912	0.556454	2.28891	0.239571	0.179103	0.999988
	130	1	6	7	4	4	0.817988	0.027971	0.556706	0.556706	0.266187	0.491898	0.999994
	130	1	7	7	7	7	0.821123	0.0183386	0.817988	0.817988	0.265174	0.406955	0.999977
	130	1	8	7	7	7	0.823716	0.0234326	0.821123	0.821123	0.266973	0.410474	0.00588826
	130	1	9	4	7	7	0.559742	0.0446424	0.823716	0.821123	0.199471	0.283867	0.00218746
	130	1	10	7	4	7	0.82446	0.0850244	0.559742	0.821123	0.27985	0.473469	1
	131	1	1	7	200	200	0.813079	0.116978	2.28891	2.28891	0.283033	0.119224	0.986038
	131	1	2	7	7	7	0.816166	0.249794	0.813079	0.813079	0.312726	0.545963	0.999302
	131	1	3	7	7	7	0.817828	0.0370477	0.816166	0.816166	0.267977	0.41674	0.998921
	131	1	4	7	7	7	0.819746	0.0751141	0.817828	0.817828	0.276353	0.440125	1
	131	1	5	7	7	7	0.825982	0.00722429	0.819746	0.819746	0.264375	0.402595	0.998007
	131	1	6	4	7	7	0.560874	0.0313979	0.825982	0.825982	0.197566	0.276838	0.98708
	131	1	7	7	4	4	0.828344	0.0329724	0.560874	0.560874	0.270294	0.499673	0.999957
	132	1	1	7	200	200	0.813063	0.115311	2.28891	2.28891	0.282678	0.118793	1.92068e-05
	132	1	2	7	7	200	0.813179	0.120405	0.813063	2.28891	0.283784	0.19661	0.999999
	132	1	3	7	7	7	0.817231	0.0112069	0.813179	0.813179	0.262591	0.402024	0.00066337
	132	1	4	7	7	7	0.81734	0.0153748	0.817231	0.813179	0.263459	0.404153	0.000278848
	132	1	5	7	7	7	0.817449	0.0203762	0.81734	0.813179	0.264496	0.407154	0.000359848
	132	1	6	7	7	7	0.81756	0.0246367	0.817449	0.813179	0.265387	0.409725	1.02989e-05
	132	1	7	7	7	7	0.817778	0.0437162	0.81756	0.813179	0.269317	0.421174	0.0165386
	132	1	8	7	7	7	0.81841	0.100492	0.817778	0.813179	0.281222	0.455702	0.993958
	132	1	9	4	7	7	0.55818	0.014356	0.81841	0.81841	0.194144	0.269204	0.00667378
	132	1	10	7	4	7	0.819669	0.0289898	0.55818	0.81841	0.266893	0.437449	0.0471828
	132	1	11	7	7	7	0.820032	0.0469579	0.819669	0.81841	0.270654	0.423088	0.0136096
	132	1	12	7	7	7	0.82042	0.0748363	0.820032	0.81841	0.276501	0.440006	0.99938
	132	1	13	7	7	7	0.822007	0.0247293	0.82042	0.82042	0.266726	0.410493	0.999744
	132	1	14	7	7	7	0.823896	0.0328798	0.822007	0.822007	0.268943	0.415912	0.999798
	132	1	15	4	7	7	0.560359	0.031861	0.823896	0.823896	0.197517	0.277349	0.00310911
	132	1	16	4	4	7	0.560457	0.0544601	0.560359	0.823896	0.201272	0.31047	0.992442
	132	1	17	7	4	4	0.827146	0.0249145	0.560457	0.560457	0.268296	0.494178	1.01795e-05
	132	1	18	7	7	4	0.827603	0.0710389	0.827146	0.560457	0.277903	0.496295	0.999981
	133	1	1	7	200	200	0.813555	0.138931	2.28845	2.28845	0.287811	0.125165	0.00911347
	133	1	2	7	7	200	0.814473	0.226366	0.813555	2.28845	0.306994	0.241375	1
	133	1	3	7	7	7	0.823029	0.0052794	0.814473	0.814473	0.263112	0.401391	0.999215
	133	1	4	7	7	7	0.824594	0.0276937	0.823029	0.823029	0.268098	0.412915	0.0289625
	133	1	5	7	7	7	0.826179	0.187558	0.824594	0.823029	0.302263	0.510571	0.999997
	133	1	6	7	7	7	0.829703	0.0314911	0.826179	0.826179	0.2704	0.417097	0.997282
	134	1	1	4	200	200	0.555892	0.0415868	2.28845	2.28845	0.198035	0.058298	2.42196e-05
	134	1	2	4	4	200	0.556318	0.172738	0.555892	2.28845	0.220573	0.144901	0.994078
	134	1	3	7	4	4	0.815834	0.110404	0.556318	0.556318	0.282504	0.541097	0.999991
	134	1	4	7	7	7	0.81869	0.00583512	0.815834	0.815834	0.261946	0.398884	0.000114883
	134	1	5	4	7	7	0.558163	0.0724296	0.81869	0.815834	0.20371	0.298487	0.999952
	134	1	6	4	4	4	0.559005	0.0393639	0.558163	0.558163	0.198422	0.352293	0.00198768
	134	1	7	7	4	4	0.822129	0.060111	0.559005	0.558163	0.273981	0.513422	0.00165733
	134	1	8	4	7	4	0.55922	0.0905833	0.822129	0.558163	0.207036	0.357203	0.00209246
	134	1	9	7	4	4	0.823472	0.189039	0.55922	0.558163	0.301718	0.59199	0.999995
	134	1	10	4	7	7	0.560592	0.00583512	0.823472	0.823472	0.193341	0.264978	0.000306652
	134	1	11	4	4	7	0.560685	0.0286199	0.560592	0.823472	0.197065	0.297267	6.74505e-05
	134	1	12	7	4	7	0.826863	0.0326952	0.560685	0.823472	0.269794	0.442491	0.999999
	135	1	1	4	200	200	0.555802	0.0133374	2.28845	2.28845	0.193415	0.0546065	0.00964642
	135	1	2	4	4	200	0.557108	0.414294	0.555802	2.28845	0.266726	0.234644	0.999998
	135	1	3	4	4	4	0.558352	0.0150046	0.557108	0.557108	0.19429	0.338772	0.00013376
	135	1	4	7	4	4	0.820351	0.0508489	0.558352	0.557108	0.271545	0.507017	1
	136	1	1	7	200	200	0.812947	0.0743747	2.28845	2.28845	0.274138	0.108731	0.643822
	136	1	2	7	7	7	0.813981	0.0722444	0.812947	0.812947	0.274012	0.436602	0.993357
	136	1	3	4	7	7	0.55696	0.10494	0.813981	0.813981	0.208916	0.315547	0.99977
	136	1	4	7	4	4	0.818585	0.12087	0.55696	0.55696	0.285556	0.548834	0.0133674
	136	1	5	4	7	4	0.557956	0.128373	0.818585	0.55696	0.213204	0.378582	0.998505
	136	1	6	4	4	4	0.558793	0.138931	0.557956	0.557956	0.215256	0.409607	1
	136	1	7	4	4	4	0.560979	0.153566	0.558793	0.558793	0.218391	0.419275	0.999996
	137	1	1	1	200	200	-0.189991	0.2585	2.27874	2.27874	0.0903997	0.0184377	0.00430994
	137	1	2	1	1	200	-0.189495	0.423733	-0.189991	2.27874	0.105541	0.0695801	0.99332
	137	1	3	1	1	1	-0.189131	0.0343617	-0.189495	-0.189495	0.0731505	0.194072	0.00764017
	137	1	4	1	1	1	-0.189086	0.0384369	-0.189131	-0.189495	0.0734415	0.19563	0.114377
	137	1	5	1	1	1	-0.188783	0.119386	-0.189086	-0.189495	0.0793797	0.228803	0.00340371
	137	1	6	1	1	1	-0.188702	0.137539	-0.188783	-0.189495	0.0807717	0.236747	0.986408
	137	1	7	1	1	1	-0.188402	0.0248219	-0.188702	-0.188702	0.072559	0.190556	0.00836469
	137	1	8	1	1	1	-0.188359	0.0285267	-0.188402	-0.188702	0.0728217	0.191955	0.999935
	137	1	9	1	1	1	-0.187692	0.0213024	-0.188359	-0.188359	0.0723869	0.189418	0.111727
	137	1	10	1	1	1	-0.187599	0.0285267	-0.187692	-0.188359	0.0728998	0.19214	3.01696e-05
	137	1	11	1	1	1	-0.187509	0.0563124	-0.187599	-0.188359	0.0748755	0.202942	0.948843
	137	1	12	1	1	1	-0.18731	0.00657596	-0.187509	-0.187509	0.0714094	0.183921	0.0165749
	137	1	13	1	1	1	-0.18716	0.0472358	-0.18731	-0.187509	0.0742643	0.199368	0.131118
	137	1	14	1	1	1	-0.187046	0.0638146	-0.18716	-0.187509	0.0754639	0.205956	0.00581761
	137	1	15	1	1	1	-0.186747	0.159953	-0.187046	-0.187509	0.0827351	0.2472	0.997742
	137	1	16	1	1	1	-0.186348	0.0277857	-0.186747	-0.186747	0.0729766	0.192037	0.00021648
	137	1	17	1	1	1	-0.186296	0.0405672	-0.186348	-0.186747	0.0738814	0.196931	9.03e-05
	137	1	18	1	1	1	-0.186226	0.0600172	-0.186296	-0.186747	0.075277	0.204588	8.43028e-05
	137	1	19	1	1	1	-0.186189	0.0665005	-0.186226	-0.186747	0.075749	0.207192	0.000352957
	137	1	20	1	1	1	-0.186023	0.118367	-0.186189	-0.186747	0.0796097	0.228878	0.0069105
	137	1	21	1	1	1	-0.185846	0.170141	-0.186023	-0.186747	0.0836432	0.252064	0.999493
	137	1	22	1	1	1	-0.185378	0.0138003	-0.185846	-0.185846	0.0721028	0.186955	0.99345
	138	1	1	1	200	200	-0.188805	0.680936	2.27874	2.27874	0.133535	0.0502879	0.00519284
	138	1	2	1	1	200	-0.188285	0.855616	-0.188805	2.27874	0.155959	0.177395	0.00169782
	138	1	3	1	1	200	-0.187962	0.961665	-0.188285	2.27874	0.171018	0.21856	0.00109585
	138	1	4	1	1	200	-0.187236	1.2135	-0.187962	2.27874	0.211339	0.341561	0.998853
	138	1	5	1	1	1	-0.185946	0.330743	-0.187236	-0.187236	0.0972732	0.33314	0.99999
	139	1	1	1	200	200	-0.189629	0.387148	2.27874	2.27874	0.102003	0.0251081	6.74925e-05
	139	1	2	1	1	200	-0.18947	0.438274	-0.189629	2.27874	0.106973	0.0719133	0.00391056
	139	1	3	1	1	200	-0.189001	0.596097	-0.18947	2.27874	0.123673	0.102433	0.9951
	139	1	4	1	1	1	-0.188589	0.0430679	-0.189001	-0.189001	0.0738197	0.197527	5.62493e-05
	139	1	5	1	1	1	-0.18834	0.126333	-0.188589	-0.189001	0.0799558	0.231889	0.000263585
	139	1	6	1	1	1	-0.188079	0.212376	-0.18834	-0.189001	0.0867831	0.271576	0.00137954
	139	1	7	1	1	1	-0.18779	0.304995	-0.188079	-0.189001	0.094719	0.318764	1.23145e-05
	139	1	8	1	1	1	-0.187304	0.474673	-0.18779	-0.189001	0.110947	0.415013	0.00250853
	139	1	9	1	1	1	-0.187099	0.540155	-0.187304	-0.189001	0.117838	0.454433	0.000302489
	139	1	10	1	1	1	-0.186637	0.698441	-0.187099	-0.189001	0.136031	0.551196	0.995475
	139	1	11	1	1	1	-0.186338	0.00527929	-0.186637	-0.186637	0.0714185	0.18362	0.701453
	139	1	12	1	1	1	-0.186123	0.0338986	-0.186338	-0.186338	0.0734287	0.19437	0.00133409
	139	1	13	1	1	1	-0.185939	0.092897	-0.186123	-0.186338	0.0777099	0.218034	0.0121176
	139	1	14	1	1	1	-0.185842	0.111606	-0.185939	-0.186338	0.0791189	0.225966	3.06332e-05
	139	1	15	1	1	1	-0.185672	0.167826	-0.185842	-0.186338	0.08348	0.250994	0.000209387
	140	1	1	1	200	200	-0.189846	0.309996	2.27874	2.27874	0.0948946	0.0208687	2.82963e-05
	140	1	2	1	1	200	-0.18931	0.496161	-0.189846	2.27874	0.112853	0.0819931	0.525495
	140	1	3	1	1	1	-0.188946	0.0904889	-0.18931	-0.18931	0.0772052	0.216491	6.92693e-05
	140	1	4	1	1	1	-0.188757	0.152822	-0.188946	-0.18931	0.0819467	0.243529	0.00365593
	140	1	5	1	1	1	-0.187795	0.487177	-0.188757	-0.18931	0.112155	0.422339	9.94726e-05
	140	1	6	1	1	1	-0.187763	0.492919	-0.187795	-0.18931	0.112753	0.425696	9.63615e-05
	140	1	7	1	1	1	-0.187717	0.502366	-0.187763	-0.18931	0.113741	0.431379	0.000127144
	140	1	8	1	1	1	-0.187458	0.589521	-0.187717	-0.18931	0.123191	0.484406	0.000232765
	140	1	9	1	1	1	-0.187143	0.695662	-0.187458	-0.18931	0.135603	0.549323	0.999913
	140	1	10	1	1	1	-0.186547	0.00685382	-0.187143	-0.187143	0.0715054	0.184221	0.00137941
	140	1	11	1	1	1	-0.186484	0.0225065	-0.186547	-0.187143	0.0725942	0.190033	7.49989e-05
	140	1	12	1	1	1	-0.186353	0.0633515	-0.186484	-0.187143	0.0755039	0.205939	7.58864e-06
	140	1	13	1	1	1	-0.186194	0.115774	-0.186353	-0.187143	0.0793944	0.227761	0.000339673
	140	1	14	1	1	1	-0.186139	0.128278	-0.186194	-0.187143	0.080351	0.233198	0.999913
	140	1	15	1	1	1	-0.185355	0.074651	-0.186139	-0.186139	0.0764308	0.210716	0.000798575
	140	1	16	1	1	1	-0.185309	0.0830794	-0.185355	-0.186139	0.0770534	0.214133	0.957398
	141	1	1	4	200	200	0.556748	0.243408	2.2783	2.2783	0.233512	0.0933348	0.997007
	141	1	2	4	4	4	0.557875	0.24841	0.556748	0.556748	0.234747	0.475433	1
	141	1	3	4	4	4	0.56171	0.0197283	0.557875	0.557875	0.195859	0.342908	5.14618e-05
	141	1	4	4	4	4	0.562059	0.125872	0.56171	0.557875	0.213817	0.40339	0.941524
	142	1	1	1	200	200	-0.190448	0.0714108	2.2783	2.2783	0.0756511	0.0117392	0.000104211
	142	1	2	1	1	200	-0.190184	0.158475	-0.190448	2.2783	0.0822237	0.0375713	0.00042595
	142	1	3	1	1	200	-0.189861	0.266656	-0.190184	2.2783	0.0911121	0.0484354	0.990266
	142	1	4	1	1	1	-0.18954	0.0246372	-0.189861	-0.189861	0.0724297	0.190302	2.05603e-05
	142	1	5	1	1	1	-0.189406	0.0678912	-0.18954	-0.189861	0.0755076	0.207176	3.96058e-06
	142	1	6	1	1	1	-0.189338	0.0874342	-0.189406	-0.189861	0.076938	0.215158	3.51959e-05
	142	1	7	1	1	1	-0.189041	0.187743	-0.189338	-0.189861	0.0846717	0.259606	0.00469577
	142	1	8	4	1	1	0.557853	0.199783	-0.189041	-0.189861	0.225828	0.672436	0.0361187
	142	1	9	1	4	1	-0.18878	0.254893	0.557853	-0.189861	0.0902445	0.235312	0.000108543
	142	1	10	1	1	1	-0.188522	0.340753	-0.18878	-0.189861	0.0978397	0.337903	0.000155614
	142	1	11	4	1	1	0.558399	0.344828	-0.188522	-0.189861	0.253283	0.74558	1
	142	1	12	4	4	4	0.561744	0.0224143	0.558399	0.558399	0.196305	0.344259	0.00209632
	142	1	13	4	4	4	0.56185	0.0463105	0.561744	0.558399	0.200259	0.357329	0.998881
	143	1	1	4	200	200	0.556246	0.0843777	2.2783	2.2783	0.205246	0.0651401	6.04112e-05
	143	1	2	4	4	200	0.556591	0.187187	0.556246	2.2783	0.223225	0.150512	0.993984
	143	1	3	4	4	4	0.557123	0.0753009	0.556591	0.556591	0.203935	0.372045	0.0734076
	143	1	4	4	4	4	0.557468	0.171441	0.557123	0.556591	0.220643	0.428585	0.999994
	143	1	5	4	4	4	0.558579	0.031769	0.557468	0.557468	0.197073	0.348038	1
	143	1	6	4	4	4	0.560664	0.0801172	0.558579	0.558579	0.205623	0.37615	0.99333
	143	1	7	4	4	4	0.561088	0.0406606	0.560664	0.560664	0.19914	0.353408	0.000944584
	143	1	8	4	4	4	0.561282	0.0952144	0.561088	0.560664	0.20834	0.384538	0.999993
	144	1	1	4	200	200	0.556757	0.246001	2.2783	2.2783	0.233995	0.0938748	1.43008e-05
	144	1	2	4	4	200	0.556888	0.28342	0.556757	2.2783	0.241039	0.183226	0.0878144
	144	1	3	4	4	200	0.557568	0.479962	0.556888	2.2783	0.280359	0.266544	0.000119986
	144	1	4	4	4	200	0.557649	0.499227	0.557568	2.2783	0.284421	0.275844	5.78681e-05
	144	1	5	4	4	200	0.557979	0.598239	0.557649	2.2783	0.305821	0.326914	0.999986
	144	1	6	4	4	4	0.559174	0.098734	0.557979	0.557979	0.208412	0.386254	0.999999
	144	1	7	4	4	4	0.560821	0.0758566	0.559174	0.559174	0.204943	0.373618	0.00345853
	144	1	8	4	4	4	0.560891	0.0885457	0.560821	0.559174	0.207107	0.380796	6.02798e-05
	144	1	9	4	4	4	0.560937	0.0981783	0.560891	0.559174	0.20876	0.386388	0.000174519
	144	1	10	4	4	4	0.561367	0.230348	0.560937	0.559174	0.232354	0.465517	0.999931
	144	1	11	1	4	4	-0.185066	0.0665945	0.561367	0.561367	0.0758755	0.092987	4.87745e-05
	145	1	1	7	200	200	0.815073	0.0906741	2.26796	2.26796	0.278154	0.115758	1.34416e-05
	145	1	2	7	7	200	0.817379	0.332503	0.815073	2.26796	0.331808	0.296987	0.999999
	145	1	3	7	7	7	0.821797	0.00787263	0.817379	0.817379	0.263269	0.40135	1
	145	1	4	7	7	7	0.830573	0.0519593	0.821797	0.821797	0.27486	0.431165	0.999948
	146	1	1	7	200	200	0.814764	0.0577017	2.26796	2.26796	0.271266	0.107683	0.0405736
	146	1	2	7	7	200	0.815405	0.106975	0.814764	2.26796	0.281654	0.19498	0.27235
	146	1	3	7	7	200	0.817533	0.304995	0.815405	2.26796	0.325582	0.283175	0.994562
	146	1	4	7	7	7	0.818826	0.0457539	0.817533	0.817533	0.270046	0.422074	2.92694e-05
	146	1	5	7	7	7	0.820597	0.232011	0.818826	0.817533	0.310227	0.536204	1
	147	1	1	7	200	200	0.814396	0.0185238	2.26796	2.26796	0.263222	0.0987366	0.0246682
	147	1	2	7	7	200	0.814601	0.0287119	0.814396	2.26796	0.265331	0.166424	0.692258
	147	1	3	7	7	200	0.815026	0.0358436	0.814601	2.26796	0.266898	0.168986	0.415215
	147	1	4	7	7	200	0.81577	0.0856727	0.815026	2.26796	0.277329	0.187042	0.996285
	147	1	5	7	7	7	0.816806	0.0048162	0.81577	0.81577	0.261188	0.397255	0.116691
	147	1	6	7	7	7	0.817662	0.0720577	0.816806	0.81577	0.275089	0.437624	0.999364
	147	1	7	7	7	7	0.819141	0.00926191	0.817662	0.817662	0.262764	0.400597	0.99967
	147	1	8	7	7	7	0.821196	0.055201	0.819141	0.819141	0.272691	0.428579	3.41367e-06
	147	1	9	7	7	7	0.821291	0.0618696	0.821196	0.819141	0.27409	0.432434	0.00010437
	147	1	10	7	7	7	0.821408	0.0694644	0.821291	0.819141	0.275691	0.437058	0.76512
	147	1	11	7	7	7	0.822033	0.0225065	0.821408	0.821408	0.266285	0.408893	0.000508529
	147	1	12	7	7	7	0.822197	0.024081	0.822033	0.821408	0.266652	0.409857	0.991774
	147	1	13	7	7	7	0.823226	0.0170419	0.822197	0.822197	0.265536	0.406096	6.07138e-05
	147	1	14	7	7	7	0.823389	0.0295455	0.823226	0.822197	0.268114	0.413488	0.00421468
	147	1	15	7	7	7	0.82352	0.0343617	0.823389	0.822197	0.269132	0.416408	0.999979
	147	1	16	7	7	7	0.826723	0.0891922	0.82352	0.82352	0.281416	0.450879	0.992557
	147	1	17	7	7	7	0.828203	0.0654817	0.826723	0.826723	0.276934	0.436419	8.83548e-05
	147	1	18	7	7	7	0.829086	0.157823	0.828203	0.826723	0.296739	0.492925	0.997154
	147	1	19	7	7	7	0.830309	0.0178755	0.829086	0.829086	0.267811	0.40848	1.89238e-06
	147	1	20	7	7	7	0.831916	0.192277	0.830309	0.829086	0.305141	0.514926	0.983613
	148	1	1	7	200	200	0.815084	0.0917856	2.26796	2.26796	0.278388	0.116039	6.29205e-07
	148	1	2	7	7	200	0.815851	0.17116	0.815084	2.26796	0.295418	0.220971	0.992478
	148	1	3	7	7	7	0.818899	0.235067	0.815851	0.815851	0.310351	0.537733	0.996774
	148	1	4	7	7	7	0.820308	0.0439941	0.818899	0.818899	0.270132	0.421447	0.999613
	148	1	5	7	7	7	0.821819	0.00268596	0.820308	0.820308	0.262236	0.397436	1
	148	1	6	7	7	7	0.830816	0.00657596	0.821819	0.821819	0.265676	0.404295	0.0182281
	148	1	7	7	7	7	0.8315	0.0602024	0.830816	0.821819	0.276845	0.435768	0.0107694
	148	1	8	7	7	7	0.831789	0.0779853	0.8315	0.821819	0.280631	0.446593	0.993252
	149	1	1	4	200	200	0.556935	0.126799	2.26754	2.26754	0.21267	0.0727663	0.00722754
	149	1	2	4	4	200	0.557015	0.140507	0.556935	2.26754	0.215074	0.137662	0.0178894
	149	1	3	4	4	200	0.557774	0.368633	0.557015	2.26754	0.257785	0.218413	0.956112
	149	1	4	4	4	4	0.558038	0.018339	0.557774	0.557774	0.194756	0.34025	0.0134173
	149	1	5	4	4	4	0.558231	0.0644644	0.558038	0.557774	0.202394	0.366102	0.035199
	149	1	6	4	4	4	0.558394	0.0964188	0.558231	0.557774	0.207822	0.3845	1
	149	1	7	4	4	4	0.560075	0.00796543	0.558394	0.558394	0.193562	0.335459	1
	149	1	8	4	4	4	0.561829	0.0160235	0.560075	0.560075	0.195285	0.340311	0.761265
	149	1	9	4	4	4	0.562258	0.0852116	0.561829	0.561829	0.206883	0.378993	0.99976
	150	1	1	4	200	200	0.556618	0.0262118	2.26754	2.26754	0.195696	0.0577688	0.00499595
	150	1	2	4	4	200	0.55682	0.0792838	0.556618	2.26754	0.20453	0.12079	0.999416
	150	1	3	4	4	4	0.557449	0.049645	0.55682	0.55682	0.19974	0.35761	0.000634963
	150	1	4	4	4	4	0.557505	0.0603891	0.557449	0.55682	0.201536	0.363644	0.999822
	150	1	5	4	4	4	0.558123	0.0121334	0.557505	0.557505	0.193771	0.33697	0.000383562
	150	1	6	4	4	4	0.558234	0.040105	0.558123	0.557505	0.198358	0.35243	7.43661e-05
	150	1	7	4	4	4	0.558721	0.189966	0.558234	0.557505	0.224287	0.440136	0.998853
	150	1	8	4	4	4	0.559683	0.173572	0.558721	0.558721	0.221603	0.430522	0.900667
	150	1	9	4	4	4	0.55996	0.0323248	0.559683	0.559683	0.197497	0.348445	0.00610661
	150	1	10	4	4	4	0.560091	0.0619637	0.55996	0.559683	0.202433	0.365129	0.999609
	150	1	11	4	4	4	0.560626	0.00916951	0.560091	0.560091	0.193887	0.335927	0.999996
	150	1	12	4	4	4	0.561716	0.0132448	0.560626	0.560626	0.194807	0.338572	0.830055
	150	1	13	4	4	4	0.562189	0.0965114	0.561716	0.561716	0.20879	0.385516	0.949713
	150	1	14	4	4	4	0.562426	0.0159309	0.562189	0.562189	0.195413	0.339976	0.997998
	151	1	1	4	200	200	0.556737	0.0638161	2.26754	2.26754	0.201919	0.0630018	1.56847e-06
	151	1	2	4	4	200	0.556819	0.0881755	0.556737	2.26754	0.20603	0.123114	0.353015
	151	1	3	4	4	200	0.557002	0.117722	0.556819	2.26754	0.21112	0.131179	0.01609
	151	1	4	4	4	200	0.557458	0.248132	0.557002	2.26754	0.234582	0.172144	0.00114051
	151	1	5	4	4	200	0.557814	0.353258	0.557458	2.26754	0.254766	0.212045	0.999981
	151	1	6	4	4	4	0.558707	0.0173202	0.557814	0.557814	0.19475	0.340029	0.000224201
	151	1	7	4	4	4	0.559274	0.19293	0.558707	0.557814	0.224967	0.442129	0.999996
	151	1	8	4	4	4	0.560364	0.00537204	0.559274	0.559274	0.193212	0.33395	1
	152	1	1	4	200	200	0.556964	0.135968	2.26754	2.26754	0.21427	0.0742992	0.998198
	152	1	2	4	4	4	0.557504	0.0510343	0.556964	0.556964	0.199983	0.358379	0.999646
	152	1	3	4	4	4	0.558076	0.0186169	0.557504	0.557504	0.19481	0.340499	1
	152	1	4	4	4	4	0.560648	0.134023	0.558076	0.558076	0.214875	0.407712	0.996866
	152	1	5	4	4	4	0.561116	0.0390862	0.560648	0.560648	0.198888	0.352547	0.974352
	152	1	6	4	4	4	0.561367	0.0101883	0.561116	0.561116	0.194228	0.33658	0.000971258
	152	1	7	4	4	4	0.561632	0.0861378	0.561367	0.561116	0.206884	0.37937	0.979738
	152	1	8	4	4	4	0.562051	0.0616858	0.561632	0.561632	0.202868	0.365488	0.000154458
	152	1	9	4	4	4	0.562398	0.165885	0.562051	0.561632	0.220945	0.426528	0.99366
	153	1	1	4	200	200	0.556339	0.0988246	2.25746	2.25746	0.207717	0.069001	0.219686
	153	1	2	4	4	4	0.556483	0.0121331	0.556339	0.556339	0.193382	0.336444	0.00223215
	153	1	3	4	4	4	0.557033	0.178384	0.556483	0.556339	0.221766	0.432617	0.959895
	153	1	4	4	4	4	0.55732	0.0280636	0.557033	0.557033	0.196166	0.345444	0.0128937
	153	1	5	7	4	4	0.817546	0.0885439	0.55732	0.557033	0.278467	0.52853	4.64478e-05
	153	1	6	7	7	4	0.817644	0.0932675	0.817546	0.557033	0.279479	0.505783	1
	153	1	7	7	7	7	0.823832	0.0157453	0.817644	0.817644	0.265454	0.407049	0.999998
	153	1	8	7	7	7	0.827497	0.0132445	0.823832	0.823832	0.266037	0.405757	0.999986
	153	1	9	7	7	7	0.830044	0.000185238	0.827497	0.827497	0.26416	0.398394	0.999562
	154	1	1	4	200	200	0.556226	0.0628884	2.25746	2.25746	0.201639	0.0635465	0.000183782
	154	1	2	4	4	200	0.557398	0.429197	0.556226	2.25746	0.269838	0.246261	5.40481e-05
	154	1	3	7	4	200	0.817363	0.450222	0.557398	2.25746	0.359326	0.386326	0.999998
	154	1	4	7	7	7	0.820994	0.0133372	0.817363	0.817363	0.264129	0.404122	1
	154	1	5	4	7	7	0.560938	0.0519593	0.820994	0.820994	0.200974	0.288335	0.985597
	154	1	6	7	4	4	0.828309	0.00778001	0.560938	0.560938	0.265176	0.484228	0.955495
	154	1	7	4	7	7	0.561433	0.00898406	0.828309	0.828309	0.194049	0.265678	0.999986
	155	1	1	7	200	200	0.813095	0.00564977	2.25746	2.25746	0.260267	0.0968534	0.0062508
	155	1	2	4	7	200	0.556231	0.0500143	0.813095	2.25746	0.199505	0.104265	1.13345e-05
	155	1	3	7	4	200	0.814261	0.11068	0.556231	2.25746	0.282077	0.214112	0.071429
	155	1	4	7	7	200	0.814564	0.126055	0.814261	2.25746	0.285402	0.203588	1.00868e-05
	155	1	5	4	7	200	0.556582	0.13578	0.814564	2.25746	0.214139	0.125579	0.0414712
	155	1	6	4	4	200	0.556866	0.212376	0.556582	2.25746	0.227848	0.161036	0.754177
	155	1	7	4	4	200	0.557028	0.220897	0.556866	2.25746	0.229446	0.163908	0.504344
	155	1	8	7	4	4	0.816879	0.0586279	0.557028	0.557028	0.272092	0.509902	1
	155	1	9	7	7	7	0.826113	0.0115774	0.816879	0.816879	0.26529	0.406101	0.998322
	155	1	10	4	7	7	0.560946	0.0351027	0.826113	0.826113	0.198191	0.278657	0.99943
	155	1	11	4	4	4	0.561446	0.01167	0.560946	0.560946	0.194487	0.33748	0.514496
	155	1	12	4	4	4	0.561646	0.0263038	0.561446	0.561446	0.196917	0.345494	0.000206347
	155	1	13	7	4	4	0.830088	0.0769665	0.561646	0.561446	0.279896	0.527372	0.996743
	155	1	14	7	7	7	0.831068	0.00389	0.830088	0.830088	0.265209	0.40036	0.821619
	156	1	1	7	200	200	0.813075	0.00351953	2.25746	2.25746	0.259837	0.0963944	0.000133193
	156	1	2	4	7	200	0.55626	0.0687234	0.813075	2.25746	0.202621	0.108626	0.00848123
	156	1	3	7	4	200	0.814532	0.143374	0.55626	2.25746	0.28906	0.22799	0.0539335
	156	1	4	4	7	200	0.556792	0.211079	0.814532	2.25746	0.227593	0.147307	2.4616e-06
	156	1	5	7	4	200	0.817403	0.430123	0.556792	2.25746	0.354568	0.374813	0.998864
	156	1	6	4	7	7	0.558252	0.111884	0.817403	0.817403	0.210432	0.318949	0.00182219
	156	1	7	7	4	7	0.819922	0.131427	0.558252	0.817403	0.288206	0.500135	0.999975
	156	1	8	7	7	7	0.822612	0.036955	0.819922	0.819922	0.269388	0.418246	0.000127752
	156	1	9	7	7	7	0.822872	0.0576091	0.822612	0.819922	0.273691	0.430477	0.999966
	156	1	10	7	7	7	0.825157	0.00722429	0.822872	0.822872	0.264131	0.401191	3.33458e-05
	156	1	11	7	7	7	0.82524	0.0102807	0.825157	0.822872	0.26477	0.402818	0.999613
	156	1	12	7	7	7	0.82714	0.0467727	0.82524	0.82524	0.272755	0.425045	0.30228
	156	1	13	4	7	7	0.561412	0.215988	0.82714	0.82524	0.229728	0.375868	1.88257e-05
	156	1	14	7	4	7	0.82959	0.287119	0.561412	0.82524	0.32555	0.597725	0.999918
	157	1	1	7	200	200	0.814493	0.0807655	2.25682	2.25682	0.275925	0.114574	1.17416e-05
	157	1	2	7	7	200	0.814576	0.084563	0.814493	2.25682	0.276735	0.187695	3.55525e-05
	157	1	3	7	7	200	0.814694	0.0923431	0.814576	2.25682	0.278385	0.190652	0.000180536
	157	1	4	7	7	200	0.815644	0.188113	0.814694	2.25682	0.299015	0.229827	0.00106241
	157	1	5	7	7	200	0.816445	0.263599	0.815644	2.25682	0.315895	0.264423	3.63227e-05
	157	1	6	1	7	200	-0.189562	0.267582	0.816445	2.25682	0.0912291	0.0337486	2.37589e-05
	157	1	7	7	1	200	0.816616	0.272028	-0.189562	2.25682	0.317838	0.353288	0.0168943
	157	1	8	7	7	200	0.817665	0.374745	0.816616	2.25682	0.341662	0.321104	1.85935e-05
	157	1	9	7	7	200	0.817768	0.381228	0.817665	2.25682	0.343207	0.324533	0.0299217
	157	1	10	1	7	200	-0.18911	0.396325	0.817768	2.25682	0.102949	0.0456967	0.0175271
	157	1	11	7	1	200	0.818253	0.404661	-0.18911	2.25682	0.348859	0.43132	0.999559
	157	1	12	7	7	7	0.820184	0.0532571	0.818253	0.818253	0.271988	0.427111	1
	157	1	13	7	7	7	0.827306	0.0561283	0.820184	0.820184	0.274729	0.4323	0.999997
	157	1	14	7	7	7	0.830804	0.0263044	0.827306	0.827306	0.269673	0.414294	0.966462
	157	1	15	7	7	7	0.831543	0.012226	0.830804	0.830804	0.267034	0.405316	0.967866
	158	1	1	1	200	200	-0.190018	0.135597	2.25682	2.25682	0.0804744	0.0140911	0.000118175
	158	1	2	7	1	200	0.818079	0.458289	-0.190018	2.25682	0.3615	0.463739	1
	158	1	3	7	7	7	0.827673	0.0241741	0.818079	0.818079	0.268303	0.41407	0.00333341
	158	1	4	7	7	7	0.827827	0.0301944	0.827673	0.818079	0.269573	0.416814	0.999994
	159	1	1	1	200	200	-0.190388	0.00426057	2.25682	2.25682	0.0709416	0.0102495	4.40475e-07
	159	1	2	7	1	200	0.814646	0.0946587	-0.190388	2.25682	0.278851	0.2606	0.000422122
	159	1	3	7	7	200	0.814779	0.101883	0.814646	2.25682	0.280397	0.194307	0.00821469
	159	1	4	1	7	200	-0.189368	0.34029	0.814779	2.25682	0.097684	0.040099	2.42506e-05
	159	1	5	7	1	200	0.817421	0.361778	-0.189368	2.25682	0.338569	0.405349	0.000119487
	159	1	6	7	7	200	0.82004	0.638251	0.817421	2.25682	0.406187	0.47533	9.38835e-05
	159	1	7	1	7	200	-0.187719	0.912409	0.82004	2.25682	0.163967	0.14506	0.00125059
	159	1	8	7	1	200	0.823338	0.980023	-0.187719	2.25682	0.494685	0.758153	1
	160	1	1	7	200	200	0.81454	0.085767	2.25682	2.25682	0.276974	0.115833	0.303077
	160	1	2	7	7	7	0.814894	0.0075023	0.81454	0.81454	0.261163	0.398133	0.009136
	160	1	3	1	7	7	-0.189288	0.267212	0.814894	0.81454	0.0912319	0.107695	0.000696431
	160	1	4	7	1	7	0.818167	0.337604	-0.189288	0.81454	0.333245	0.689753	0.999998
	160	1	5	7	7	7	0.822247	0.0450138	0.818167	0.818167	0.270922	0.423381	0.714644
	160	1	6	1	7	7	-0.187612	0.0322321	0.822247	0.822247	0.0731579	0.0632646	5.56758e-05
	160	1	7	7	1	7	0.82307	0.0354738	-0.187612	0.822247	0.269224	0.515957	1
	160	1	8	7	7	7	0.829796	0.0349181	0.82307	0.82307	0.271128	0.42014	5.54747e-05
	160	1	9	7	7	7	0.830124	0.0626118	0.829796	0.82307	0.276925	0.436265	0.99952
	161	1	1	7	200	200	0.813377	0.00777998	2.28536	2.28536	0.260774	0.0943335	0.000469866
	161	1	2	7	7	200	0.81374	0.0386221	0.813377	2.28536	0.267078	0.167494	0.0308027
	161	1	3	7	7	200	0.813916	0.0449201	0.81374	2.28536	0.268407	0.169691	0.00584946
	161	1	4	7	7	200	0.814795	0.125035	0.813916	2.28536	0.285259	0.199436	5.64397e-05
	161	1	5	7	7	200	0.814897	0.130037	0.814795	2.28536	0.286347	0.20138	0.00169715
	161	1	6	7	7	200	0.81502	0.135038	0.814897	2.28536	0.287443	0.203395	0.0176484
	161	1	7	7	7	200	0.815594	0.18533	0.81502	2.28536	0.298396	0.224284	0.00623068
	161	1	8	7	7	200	0.816366	0.258499	0.815594	2.28536	0.31473	0.257257	0.0767368
	161	1	9	7	7	7	0.816644	0.0164862	0.816366	0.816366	0.263477	0.403841	0.997796
	161	1	10	7	7	7	0.817765	0.00564975	0.816644	0.816644	0.261637	0.398016	0.00699074
	161	1	11	7	7	7	0.818014	0.0184311	0.817765	0.816644	0.264272	0.405564	0.0197529
	161	1	12	7	7	7	0.818209	0.0250071	0.818014	0.816644	0.265654	0.409535	0.0168963
	161	1	13	7	7	7	0.818981	0.0922484	0.818209	0.816644	0.279677	0.450254	0.940231
	161	1	14	7	7	7	0.819641	0.0114847	0.818981	0.818981	0.263357	0.401785	0.0418024
	161	1	15	7	7	7	0.820326	0.0704829	0.819641	0.818981	0.275573	0.437246	0.997723
	161	1	16	7	7	7	0.821586	0.0216728	0.820326	0.820326	0.265984	0.408477	0.0134137
	161	1	17	7	7	7	0.821741	0.0270447	0.821586	0.820326	0.267116	0.411623	0.999931
	161	1	18	7	7	7	0.82431	0.0641849	0.821741	0.821741	0.275482	0.434949	0.994112
	161	1	19	7	7	7	0.82562	0.0461242	0.82431	0.82431	0.272164	0.424078	0.991941
	161	1	20	7	7	7	0.826587	0.0142633	0.82562	0.82562	0.265973	0.405307	0.982618
	161	1	21	7	7	7	0.827516	0.0225064	0.826587	0.826587	0.267917	0.410406	0.0851682
	161	1	22	7	7	7	0.827806	0.034269	0.827516	0.826587	0.270397	0.417463	0.999999
	162	1	1	7	200	200	0.81415	0.0900255	2.28536	2.28536	0.277737	0.113166	2.93436e-06
	162	1	2	7	7	200	0.814779	0.152914	0.81415	2.28536	0.291169	0.210529	0.000181025
	162	1	3	7	7	200	0.815416	0.213301	0.814779	2.28536	0.30443	0.236358	0.0619337
	162	1	4	7	7	200	0.81558	0.218673	0.815416	2.28536	0.305661	0.238762	0.985311
	162	1	5	7	7	7	0.817645	0.143467	0.81558	0.81558	0.290053	0.481139	0.99995
	162	1	6	7	7	7	0.819815	0.00676117	0.817645	0.817645	0.262462	0.39951	0.0022273
	162	1	7	7	7	7	0.82001	0.0158378	0.819815	0.817645	0.264341	0.404752	0.00163163
	162	1	8	7	7	7	0.82079	0.0919705	0.82001	0.817645	0.280173	0.450738	0.0396074
	162	1	9	7	7	7	0.821177	0.118367	0.82079	0.817645	0.285832	0.46692	0.0238995
	162	1	10	7	7	7	0.821748	0.166066	0.821177	0.817645	0.296189	0.496343	0.00236439
	162	1	11	7	7	7	0.822499	0.238216	0.821748	0.817645	0.312223	0.540766	0.00146119
	162	1	12	7	7	7	0.823151	0.30166	0.822499	0.817645	0.326702	0.579295	0.00141957
	162	1	13	7	7	7	0.824778	0.471708	0.823151	0.817645	0.367073	0.67688	0.999979
	162	1	14	7	7	7	0.827497	0.0331575	0.824778	0.824778	0.270078	0.417268	0.996942
	162	1	15	7	7	7	0.828569	0.00583499	0.827497	0.827497	0.264861	0.400887	0.00156304
	162	1	16	7	7	7	0.828699	0.0107438	0.828569	0.827497	0.265889	0.403746	0.00119247
	162	1	17	7	7	7	0.828817	0.014819	0.828699	0.827497	0.266748	0.406203	0.000450569
	162	1	18	7	7	7	0.828939	0.0217654	0.828817	0.827497	0.268192	0.410366	0.000381896
	162	1	19	7	7	7	0.829905	0.123183	0.828939	0.827497	0.289574	0.472002	0.999893
	163	1	1	7	200	200	0.813989	0.072891	2.28536	2.28536	0.274148	0.10899	0.00606631
	163	1	2	7	7	200	0.818028	0.483841	0.813989	2.28536	0.367603	0.376503	0.184935
	163	1	3	7	7	200	0.818351	0.500234	0.818028	2.28536	0.371669	0.385764	1
	163	1	4	7	7	7	0.824132	0.104381	0.818351	0.818351	0.283802	0.46021	0.00104584
	163	1	5	7	7	7	0.825197	0.213116	0.824132	0.818351	0.307549	0.52666	1.26264e-05
	163	1	6	7	7	7	0.826561	0.357787	0.825197	0.818351	0.340761	0.613837	1
	164	1	1	7	200	200	0.813853	0.0584425	2.28536	2.28536	0.271143	0.105574	0.00144011
	164	1	2	7	7	200	0.814602	0.120312	0.813853	2.28536	0.284204	0.19753	0.00540496
	164	1	3	7	7	200	0.814843	0.127721	0.814602	2.28536	0.285841	0.200462	0.0014182
	164	1	4	7	7	200	0.816797	0.319813	0.814843	2.28536	0.328709	0.287214	1
	165	1	1	4	200	200	0.556763	0.133096	2.28477	2.28477	0.213719	0.0723207	0.00011537
	165	1	2	4	4	200	0.556831	0.147916	0.556763	2.28477	0.216323	0.138013	0.0124445
	165	1	3	4	4	200	0.556885	0.152825	0.556831	2.28477	0.217199	0.13946	0.000471531
	165	1	4	4	4	200	0.557285	0.272676	0.556885	2.28477	0.239122	0.178635	0.000330239
	165	1	5	4	4	200	0.557341	0.28342	0.557285	2.28477	0.241165	0.18252	0.00173673
	165	1	6	4	4	200	0.557633	0.367057	0.557341	2.28477	0.257433	0.215165	0.00029716
	165	1	7	4	4	200	0.55768	0.375578	0.557633	2.28477	0.259135	0.218706	0.000104343
	165	1	8	4	4	200	0.55831	0.57036	0.55768	2.28477	0.29984	0.311054	0.00373021
	165	1	9	4	4	200	0.559139	0.824327	0.55831	2.28477	0.357982	0.457076	0.0400789
	165	1	10	4	4	200	0.559213	0.835256	0.559139	2.28477	0.36061	0.46368	0.999997
	165	1	11	4	4	4	0.560531	0.0562209	0.559213	0.559213	0.201583	0.362277	0.00181305
	165	1	12	4	4	4	0.56063	0.0802098	0.560531	0.559213	0.205631	0.375876	0.00537007
	165	1	13	4	4	4	0.560708	0.0946587	0.56063	0.559213	0.208102	0.384238	0.999977
	165	1	14	4	4	4	0.562491	0.312225	0.560708	0.560708	0.248118	0.515886	0.87567
	166	1	1	4	200	200	0.557509	0.36965	2.28477	2.28477	0.25791	0.122276	0.000140463
	166	1	2	4	4	200	0.557889	0.484686	0.557509	2.28477	0.281444	0.267816	4.02606e-06
	166	1	3	4	4	200	0.558083	0.544704	0.557889	2.28477	0.294228	0.297636	0.999539
	166	1	4	4	4	4	0.558618	0.0152825	0.558083	0.558083	0.194398	0.338789	0.00547832
	166	1	5	4	4	4	0.559319	0.227292	0.558618	0.558083	0.231237	0.462933	0.999999
	166	1	6	4	4	4	0.560839	0.0313985	0.559319	0.559319	0.197557	0.348498	0.999891
	167	1	1	4	200	200	0.556597	0.0805803	2.28477	2.28477	0.204693	0.0641366	0.00189314
	167	1	2	4	4	200	0.556657	0.0898424	0.556597	2.28477	0.206271	0.121925	0.999182
	167	1	3	4	4	4	0.557135	0.00676133	0.556657	0.556657	0.192671	0.333765	9.60243e-05
	167	1	4	4	4	4	0.559386	0.716887	0.557135	0.556657	0.332949	0.741033	0.976498
	167	1	5	4	4	4	0.559703	0.0296387	0.559386	0.559386	0.196995	0.346903	0.000126727
	167	1	6	4	4	4	0.560207	0.184501	0.559703	0.559386	0.223697	0.437153	8.93683e-05
	167	1	7	4	4	4	0.560573	0.295183	0.560207	0.559386	0.244305	0.504685	6.94874e-05
	167	1	8	4	4	4	0.56139	0.55091	0.560573	0.559386	0.29661	0.656153	6.45604e-05
	167	1	9	4	4	4	0.561487	0.577214	0.56139	0.559386	0.302349	0.670503	0.999997
	168	1	1	4	200	200	0.556611	0.0847482	2.28477	2.28477	0.205399	0.0647533	0.00117081
	168	1	2	4	4	200	0.556699	0.100772	0.556611	2.28477	0.208139	0.124827	1.17285e-05
	168	1	3	4	4	200	0.557681	0.407532	0.556699	2.28477	0.26553	0.232425	0.0057104
	168	1	4	4	4	200	0.558163	0.544056	0.557681	2.28477	0.294114	0.297361	0.000757522
	168	1	5	4	4	200	0.558848	0.751527	0.558163	2.28477	0.340769	0.413173	1
	168	1	6	4	4	4	0.560851	0.0162087	0.558848	0.558848	0.195081	0.340247	0.999999
	168	1	7	4	4	4	0.562253	0.00833589	0.560851	0.560851	0.194139	0.336103	0.00826876
	168	1	8	4	4	4	0.562312	0.0121334	0.562253	0.560851	0.194769	0.338087	7.20673e-05
	169	1	1	7	200	200	0.813883	0.0427899	2.27514	2.27514	0.267965	0.1032	1.22095e-05
	169	1	2	7	7	200	0.817764	0.453462	0.813883	2.27514	0.360238	0.361114	6.65967e-05
	169	1	3	1	7	200	-0.188532	0.682601	0.817764	2.27514	0.133782	0.0868352	1.59641e-05
	169	1	4	4	1	200	0.559295	0.977592	-0.188532	2.27514	0.395229	0.624064	0.000240408
	169	1	5	7	4	200	0.829544	1.7191	0.559295	2.27514	0.679738	0.934272	0.999979
	170	1	1	7	200	200	0.816299	0.300548	2.27514	2.27514	0.324162	0.178598	0.00762666
	170	1	2	4	7	200	0.557177	0.307217	0.816299	2.27514	0.245652	0.177168	4.87795e-05
	170	1	3	7	4	200	0.816694	0.327685	0.557177	2.27514	0.330474	0.314479	1.28514e-05
	170	1	4	7	7	200	0.817177	0.375847	0.816694	2.27514	0.341752	0.318014	0.00269394
	170	1	5	1	7	200	-0.189283	0.394834	0.817177	2.27514	0.102782	0.0448514	0.000442712
	170	1	6	7	1	200	0.817901	0.435772	-0.189283	2.27514	0.35608	0.446002	2.06698e-06
	170	1	7	1	7	200	-0.189113	0.445126	0.817901	2.27514	0.107704	0.0504335	0.000133104
	170	1	8	7	1	200	0.818704	0.512923	-0.189113	2.27514	0.374864	0.493434	1
	170	1	9	7	7	7	0.828136	0.0250071	0.818704	0.818704	0.26861	0.414636	0.999976
	170	1	10	7	7	7	0.830495	0.00231547	0.828136	0.828136	0.264723	0.399704	0.10732
	170	1	11	7	7	7	0.830855	0.00916926	0.830495	0.828136	0.266212	0.403711	0.00267906
	170	1	12	7	7	7	0.83164	0.0810415	0.830855	0.828136	0.281223	0.447077	3.51959e-05
	170	1	13	4	7	7	0.562389	0.0858577	0.83164	0.828136	0.207025	0.30417	0.268204
	171	1	1	7	200	200	0.81455	0.113829	2.27514	2.27514	0.282826	0.120596	7.33163e-06
	171	1	2	4	7	200	0.556584	0.125499	0.81455	2.27514	0.212356	0.121216	0.000533252
	171	1	3	7	4	200	0.815256	0.176254	0.556584	2.27514	0.296327	0.239961	7.24996e-06
	171	1	4	1	7	200	-0.189265	0.413914	0.815256	2.27514	0.104619	0.0469301	0.000236761
	171	1	5	1	1	200	-0.189074	0.474764	-0.189265	2.27514	0.110691	0.0783844	3.22452e-05
	171	1	6	4	1	200	0.557781	0.480321	-0.189074	2.27514	0.280499	0.328898	4.76429e-05
	171	1	7	4	4	200	0.558092	0.572662	0.557781	2.27514	0.30027	0.313926	1
	171	1	8	4	4	4	0.560882	0.0049088	0.558092	0.558092	0.19326	0.334296	0.00402579
	171	1	9	7	4	4	0.827711	0.0275078	0.560882	0.558092	0.268991	0.496559	0.00298077
	171	1	10	7	7	4	0.828293	0.0803931	0.827711	0.558092	0.28006	0.502871	6.02188e-05
	171	1	11	4	7	4	0.561296	0.104474	0.828293	0.558092	0.209928	0.365613	0.992994
	171	1	12	4	4	4	0.561853	0.0900255	0.561296	0.561296	0.2076	0.381704	0.00305089
	171	1	13	4	4	4	0.562168	0.180885	0.561853	0.561296	0.223566	0.435486	0.993862
	172	1	1	7	200	200	0.818063	0.489676	2.27514	2.27514	0.36902	0.257497	0.999987
	172	1	2	4	7	7	0.558668	0.0121331	0.818063	0.818063	0.193901	0.268444	6.98424e-07
	172	1	3	1	4	7	-0.188218	0.0216728	0.558668	0.818063	0.0723589	0.0682107	1.61957e-05
	172	1	4	7	1	7	0.821934	0.119849	-0.188218	0.818063	0.286381	0.567458	0.999581
	172	1	5	4	7	7	0.559644	0.0396409	0.821934	0.821934	0.198622	0.281341	0.000118561
	172	1	6	4	4	7	0.559713	0.0563123	0.559644	0.821934	0.201398	0.311492	1
	172	1	7	4	4	4	0.561578	0.0123183	0.559713	0.559713	0.194623	0.338249	0.999974
	173	1	1	1	200	200	-0.189079	0.464402	2.27473	2.27473	0.10964	0.03036	0.000380265
	173	1	2	1	1	200	-0.188441	0.680209	-0.189079	2.27473	0.133512	0.123458	2.3535e-05
	173	1	3	1	1	200	-0.188101	0.796355	-0.188441	2.27473	0.148096	0.157711	0.00704862
	173	1	4	1	1	200	-0.188049	0.80395	-0.188101	2.27473	0.1491	0.160193	0.94032
	173	1	5	1	1	1	-0.187862	0.00537202	-0.188049	-0.188049	0.0712712	0.183389	0.585427
	173	1	6	1	1	1	-0.18774	0.0166718	-0.187862	-0.188049	0.072061	0.187597	0.197217
	173	1	7	1	1	1	-0.187506	0.0767828	-0.18774	-0.188049	0.0763556	0.21113	0.00024874
	173	1	8	1	1	1	-0.187271	0.153473	-0.187506	-0.188049	0.0821677	0.244156	0.999991
	173	1	9	1	1	1	-0.186389	0.0173201	-0.187271	-0.187271	0.0722435	0.188181	0.0037324
	173	1	10	1	1	1	-0.186324	0.0291756	-0.186389	-0.187271	0.0730764	0.192622	0.001146
	173	1	11	1	1	1	-0.186286	0.0345476	-0.186324	-0.187271	0.0734575	0.194684	0.0421722
	173	1	12	1	1	1	-0.186146	0.0665945	-0.186286	-0.187271	0.0757604	0.207324	0.00451391
	173	1	13	1	1	1	-0.186105	0.0726149	-0.186146	-0.187271	0.076202	0.209762	5.69352e-05
	173	1	14	1	1	1	-0.186054	0.0864154	-0.186105	-0.187271	0.0772183	0.215431	0.00108827
	173	1	15	1	1	1	-0.185945	0.117536	-0.186054	-0.187271	0.0795554	0.228621	0.000681836
	173	1	16	1	1	1	-0.185697	0.199228	-0.185945	-0.187271	0.0859959	0.265866	0.00123241
	173	1	17	1	1	1	-0.185638	0.211546	-0.185697	-0.187271	0.0870097	0.271798	0.00157981
	173	1	18	1	1	1	-0.185573	0.226921	-0.185638	-0.187271	0.0882891	0.279332	0.999748
	173	1	19	1	1	1	-0.185016	0.0275084	-0.185573	-0.185573	0.0730944	0.192185	0.00873569
	173	1	20	1	1	1	-0.184977	0.0301944	-0.185016	-0.185573	0.0732868	0.193186	0.0010045
	173	1	21	1	1	1	-0.184917	0.0440876	-0.184977	-0.185573	0.0742749	0.19856	0.00130334
	174	1	1	1	200	200	-0.187556	1.00827	2.27473	2.27473	0.178051	0.106259	0.0057987
	174	1	2	1	1	200	-0.187307	1.08709	-0.187556	2.27473	0.190354	0.276378	0.00330114
	174	1	3	1	1	200	-0.186239	1.45971	-0.187307	2.27473	0.257173	0.487898	0.000216021
	174	1	4	1	1	200	-0.185866	1.58706	-0.186239	2.27473	0.283244	0.565529	0.0025741
	175	1	1	1	200	200	-0.189991	0.139487	2.27473	2.27473	0.0807757	0.0139132	0.000276921
	175	1	2	1	1	200	-0.189313	0.368354	-0.189991	2.27473	0.10028	0.0615269	0.00155873
	175	1	3	1	1	200	-0.18799	0.829236	-0.189313	2.27473	0.15246	0.168779	0.000906801
	175	1	4	1	1	200	-0.187935	0.840999	-0.18799	2.27473	0.154049	0.172799	0.000998392
	175	1	5	1	1	200	-0.187905	0.843592	-0.187935	2.27473	0.154405	0.173714	5.21105e-06
	175	1	6	1	1	200	-0.187777	0.884994	-0.187905	2.27473	0.160105	0.188782	0.000285371
	175	1	7	1	1	200	-0.18764	0.927229	-0.187777	2.27473	0.166095	0.205163	0.00148175
	175	1	8	1	1	200	-0.187441	0.989563	-0.18764	2.27473	0.175262	0.231224	0.152157
	175	1	9	1	1	200	-0.187199	1.05208	-0.187441	2.27473	0.184861	0.259618	0.000700306
	175	1	10	1	1	200	-0.187144	1.06338	-0.187199	2.27473	0.186641	0.264974	0.00362297
	175	1	11	1	1	200	-0.187054	1.08533	-0.187144	2.27473	0.190133	0.275603	0.000160512
	175	1	12	1	1	200	-0.187022	1.09043	-0.187054	2.27473	0.190953	0.278106	0.00311903
	175	1	13	1	1	200	-0.186968	1.10024	-0.187022	2.27473	0.192539	0.282977	0.0300188
	175	1	14	1	1	200	-0.186881	1.11682	-0.186968	2.27473	0.19524	0.291317	0.000582934
	175	1	15	1	1	200	-0.18678	1.14507	-0.186881	2.27473	0.199896	0.305832	0.000402139
	175	1	16	1	1	200	-0.186742	1.15276	-0.18678	2.27473	0.20118	0.30985	0.000682701
	175	1	17	1	1	200	-0.186669	1.17221	-0.186742	2.27473	0.20445	0.320152	8.01719e-05
	175	1	18	1	1	200	-0.186521	1.22065	-0.186669	2.27473	0.212758	0.346551	6.32509e-05
	175	1	19	1	1	200	-0.186295	1.29521	-0.186521	2.27473	0.226019	0.389043	0.999997
	175	1	20	1	1	1	-0.185274	0.0200988	-0.186295	-0.186295	0.0725504	0.189432	5.04848e-05
	175	1	21	1	1	1	-0.185144	0.0614077	-0.185274	-0.186295	0.075492	0.205424	4.2802e-05
	175	1	22	1	1	1	-0.184816	0.17385	-0.185144	-0.186295	0.0840582	0.254093	0.000156587
	176	1	1	1	200	200	-0.189097	0.457826	2.27473	2.27473	0.108975	0.0298887	0.000311233
	176	1	2	1	1	200	-0.18906	0.463939	-0.189097	2.27473	0.109596	0.0765146	0.000863399
	176	1	3	1	1	200	-0.188699	0.585179	-0.18906	2.27473	0.122504	0.100363	0.00132809
	176	1	4	1	1	200	-0.188307	0.716516	-0.188699	2.27473	0.137941	0.133416	0.000294542
	176	1	5	1	1	200	-0.188214	0.742728	-0.188307	2.27473	0.141213	0.141015	0.000400343
	176	1	6	1	1	200	-0.187866	0.860079	-0.188214	2.27473	0.156652	0.179611	0.000111457
	176	1	7	1	1	200	-0.187648	0.932138	-0.187866	2.27473	0.166798	0.207131	0.000174809
	176	1	8	1	1	200	-0.187617	0.936954	-0.187648	2.27473	0.167498	0.20907	4.78385e-05
	176	1	9	1	1	200	-0.187564	0.951588	-0.187617	2.27473	0.169631	0.215072	0.000924179
	176	1	10	1	1	200	-0.187525	0.957331	-0.187564	2.27473	0.170477	0.217465	0.00029979
	176	1	11	1	1	200	-0.187441	0.980764	-0.187525	2.27473	0.17395	0.227412	0.001927
	176	1	12	1	1	200	-0.186858	1.18101	-0.187441	2.27473	0.205888	0.32482	0.000125062
	176	1	13	1	1	200	-0.186815	1.19157	-0.186858	2.27473	0.20769	0.330483	0.0839532
	176	1	14	1	1	200	-0.186699	1.21158	-0.186815	2.27473	0.211144	0.341459	0.00191793
	176	1	15	1	1	200	-0.186487	1.27882	-0.186699	2.27473	0.223017	0.379464	0.999962
	176	1	16	1	1	1	-0.185805	0.0070392	-0.186487	-0.186487	0.0715931	0.184425	0.000134236
	176	1	17	1	1	1	-0.185549	0.0891014	-0.185805	-0.186487	0.0774714	0.216609	9.2743e-05
	176	1	18	1	1	1	-0.1849	0.317134	-0.185549	-0.186487	0.0961825	0.326031	0.789375
	177	1	1	1	200	200	-0.189818	0.274523	2.26471	2.26471	0.0917934	0.0195021	1.44454e-06
	177	1	2	4	1	200	0.558033	0.626846	-0.189818	2.26471	0.312156	0.414638	1
	177	1	3	4	4	4	0.559681	0.00583501	0.558033	0.558033	0.193125	0.334195	0.999839
	177	1	4	4	4	4	0.560305	0.0125962	0.559681	0.559681	0.194365	0.337747	0.993669
	177	1	5	4	4	4	0.560664	0.0103733	0.560305	0.560305	0.194091	0.336544	0.0523394
	177	1	6	1	4	4	-0.186339	0.0248219	0.560664	0.560305	0.0727704	0.0845807	1.61588e-05
	177	1	7	4	1	4	0.560844	0.0288972	-0.186339	0.560305	0.197149	0.416353	0.0781687
	177	1	8	1	4	4	-0.186179	0.0564051	0.560844	0.560305	0.0750223	0.0907841	2.71859e-05
	177	1	9	4	1	4	0.561021	0.0594615	-0.186179	0.560305	0.202243	0.434717	0.0154012
	177	1	10	4	4	4	0.561365	0.158101	0.561021	0.560305	0.219293	0.421667	0.999992
	178	1	1	4	200	200	0.556387	0.108179	2.26471	2.26471	0.209326	0.0698989	2.20623e-05
	178	1	2	1	4	200	-0.189845	0.260723	0.556387	2.26471	0.0906072	0.036408	9.67652e-05
	178	1	3	1	1	200	-0.189803	0.269429	-0.189845	2.26471	0.0913571	0.0492934	0.000162781
	178	1	4	4	1	200	0.556967	0.274616	-0.189803	2.26471	0.239399	0.229855	0.999922
	178	1	5	4	4	4	0.558135	0.160416	0.556967	0.556967	0.218862	0.422306	1
	178	1	6	4	4	4	0.560065	0.0226917	0.558135	0.558135	0.195948	0.343606	0.999961
	178	1	7	1	4	4	-0.186142	0.0743732	0.560065	0.560065	0.0763262	0.0945303	1.02428e-05
	178	1	8	1	1	4	-0.18593	0.145597	-0.186142	0.560065	0.0817085	0.143107	1.64011e-05
	178	1	9	4	1	4	0.561358	0.167363	-0.18593	0.560065	0.220936	0.500567	0.0215241
	178	1	10	1	4	4	-0.18546	0.294066	0.561358	0.560065	0.0940558	0.151752	0.97074
	178	1	11	4	1	1	0.562095	0.021395	-0.18546	-0.18546	0.196223	0.571365	0.00458651
	178	1	12	4	4	1	0.562148	0.0271374	0.562095	-0.18546	0.197174	0.501502	0.000920861
	178	1	13	4	4	1	0.562216	0.0418639	0.562148	-0.18546	0.199613	0.510543	0.000674315
	179	1	1	4	200	200	0.556552	0.160416	2.26471	2.26471	0.218451	0.0787068	0.000280502
	179	1	2	4	4	200	0.557031	0.305273	0.556552	2.26471	0.245239	0.193241	0.999985
	179	1	3	4	4	4	0.558458	0.176069	0.557031	0.557031	0.221727	0.431841	0.994583
	179	1	4	4	4	4	0.558957	0.0618696	0.558458	0.558458	0.202139	0.364846	0.000405211
	179	1	5	4	4	4	0.559031	0.0789115	0.558957	0.558458	0.205014	0.374556	0.833503
	179	1	6	4	4	4	0.5592	0.00639072	0.559031	0.559031	0.1931	0.33397	0.999966
	179	1	7	4	4	4	0.559976	0.00546453	0.5592	0.5592	0.193135	0.333819	3.24951e-05
	179	1	8	4	4	4	0.560012	0.0129667	0.559976	0.5592	0.194355	0.337864	2.30531e-05
	179	1	9	4	4	4	0.560198	0.0677046	0.560012	0.5592	0.203419	0.368542	0.999912
	179	1	10	4	4	4	0.56086	0.00472358	0.560198	0.560198	0.193225	0.333596	0.982528
	179	1	11	4	4	4	0.561298	0.0596467	0.56086	0.56086	0.202342	0.36415	0.000114724
	179	1	12	1	4	4	-0.185578	0.172549	0.561298	0.56086	0.0838656	0.117204	5.01959e-05
	180	1	1	4	200	200	0.557436	0.440775	2.26471	2.26471	0.272215	0.145291	0.00356178
	180	1	2	1	4	200	-0.189188	0.490696	0.557436	2.26471	0.112306	0.0622643	1.41976e-05
	180	1	3	1	1	200	-0.188883	0.5948	-0.189188	2.26471	0.123547	0.103268	0.000103059
	180	1	4	4	1	200	0.558079	0.625364	-0.188883	2.26471	0.311842	0.413695	0.00517846
	180	1	5	4	4	200	0.558258	0.672693	0.558079	2.26471	0.322501	0.371018	0.999927
	180	1	6	4	4	4	0.558933	0.00222286	0.558258	0.558258	0.192366	0.331782	1
	180	1	7	4	4	4	0.560756	0.114385	0.558933	0.558933	0.211496	0.395965	0.0190584
	180	1	8	1	4	4	-0.186216	0.166529	0.560756	0.558933	0.0833143	0.115728	5.72266e-05
	180	1	9	4	1	4	0.561002	0.176069	-0.186216	0.558933	0.222396	0.505957	0.999999
	181	1	1	4	200	200	0.557027	0.149027	2.26415	2.26415	0.216569	0.0768383	0.99999
	181	1	2	4	4	4	0.558576	0.191818	0.557027	0.557027	0.224582	0.441388	0.989184
	181	1	3	7	4	4	0.822261	0.0985487	0.558576	0.558576	0.282	0.536901	0.999979
	181	1	4	7	7	7	0.824813	0.0126891	0.822261	0.822261	0.265129	0.404399	0.752214
	181	1	5	7	7	7	0.825305	0.0225069	0.824813	0.822261	0.267258	0.410231	1
	181	1	6	7	7	7	0.830018	0.0178759	0.825305	0.825305	0.267725	0.409463	0.0136587
	181	1	7	7	7	7	0.830341	0.0410311	0.830018	0.825305	0.272543	0.422958	0.999636
	181	1	8	4	7	7	0.562443	0.0110219	0.830341	0.830341	0.19462	0.266613	0.00133732
	181	1	9	7	4	7	0.832608	0.0804876	0.562443	0.830341	0.281405	0.473187	0.00712035
	182	1	1	4	200	200	0.556861	0.0962332	2.26415	2.26415	0.207407	0.0681372	0.00125348
	182	1	2	7	4	200	0.81682	0.226829	0.556861	2.26415	0.307856	0.265774	0.995377
	182	1	3	7	7	7	0.818221	0.0507563	0.81682	0.81682	0.270886	0.424938	0.160051
	182	1	4	4	7	7	0.557963	0.0943808	0.818221	0.81682	0.207367	0.309613	0.00425141
	182	1	5	4	4	7	0.55802	0.101883	0.557963	0.81682	0.20866	0.336142	0.0216322
	182	1	6	4	4	7	0.558116	0.119944	0.55802	0.81682	0.211785	0.346119	0.999996
	182	1	7	4	4	4	0.559202	0.00722444	0.558116	0.558116	0.193235	0.33468	0.999999
	182	1	8	4	4	4	0.560806	0.041309	0.559202	0.559202	0.199179	0.35404	0.0200743
	182	1	9	7	4	4	0.827338	0.0514973	0.560806	0.559202	0.273785	0.510784	0.000249844
	182	1	10	7	7	4	0.828247	0.145137	0.827338	0.559202	0.293743	0.542145	0.998329
	182	1	11	7	7	7	0.829602	0.0253782	0.828247	0.828247	0.269124	0.412779	0.00230174
	182	1	12	7	7	7	0.82977	0.0338993	0.829602	0.828247	0.270911	0.417807	0.0036302
	182	1	13	7	7	7	0.830702	0.124946	0.82977	0.828247	0.290198	0.473297	0.982055
	183	1	1	4	200	200	0.556668	0.0350107	2.26415	2.26415	0.197144	0.0591945	0.00665951
	183	1	2	4	4	200	0.556739	0.046681	0.556668	2.26415	0.199079	0.112842	7.51165e-05
	183	1	3	4	4	200	0.556821	0.0623339	0.556739	2.26415	0.201692	0.11675	3.16525e-05
	183	1	4	7	4	200	0.815762	0.0916022	0.556821	2.26415	0.278557	0.205955	0.00242276
	183	1	5	4	7	200	0.557069	0.123001	0.815762	2.26415	0.212048	0.121641	5.36948e-05
	183	1	6	7	4	200	0.818078	0.322784	0.557069	2.26415	0.329818	0.314633	0.000150596
	183	1	7	7	7	200	0.8196	0.480796	0.818078	2.26415	0.367427	0.379518	1
	183	1	8	7	7	7	0.827044	0.0035196	0.8196	0.8196	0.263944	0.401055	0.999998
	183	1	9	7	7	7	0.830457	0.00509415	0.827044	0.827044	0.265271	0.401644	4.67226e-05
	183	1	10	7	7	7	0.831488	0.113461	0.830457	0.827044	0.288003	0.466942	7.78402e-06
	183	1	11	7	7	7	0.83161	0.123093	0.831488	0.827044	0.290088	0.472782	0.994761
	184	1	1	7	200	200	0.814809	0.020284	2.26415	2.26415	0.263697	0.0996348	0.000196283
	184	1	2	4	7	200	0.556656	0.0247298	0.814809	2.26415	0.195464	0.0981448	1.53408e-05
	184	1	3	4	4	200	0.556883	0.09188	0.556656	2.26415	0.206673	0.124433	0.000838122
	184	1	4	7	4	200	0.815963	0.124205	0.556883	2.26415	0.285446	0.219382	0.0142139
	184	1	5	4	7	200	0.557065	0.129855	0.815963	2.26415	0.213233	0.123434	0.00374141
	184	1	6	4	4	200	0.55725	0.179129	0.557065	2.26415	0.221956	0.149702	0.00363881
	184	1	7	7	4	200	0.817588	0.268323	0.55725	2.26415	0.317328	0.286384	0.00275369
	184	1	8	4	7	200	0.557599	0.273047	0.817588	2.26415	0.239279	0.16668	1.43357e-05
	184	1	9	7	4	200	0.819264	0.436152	0.557599	2.26415	0.356646	0.377867	0.00610764
	184	1	10	7	7	200	0.819453	0.4481	0.819264	2.26415	0.359552	0.360682	1.39241e-05
	184	1	11	4	7	200	0.559222	0.772367	0.819453	2.26415	0.345756	0.40502	0.0250263
	184	1	12	7	4	200	0.823734	0.895738	0.559222	2.26415	0.473069	0.653767	0.999705
	184	1	13	7	7	7	0.825592	0.0363074	0.823734	0.823734	0.270149	0.418383	1
	185	1	1	4	200	200	0.556999	0.335281	2.25417	2.25417	0.251019	0.117334	1
	185	1	2	4	4	4	0.560048	0.0865989	0.556999	0.556999	0.206567	0.380008	0.998845
	185	1	3	4	4	4	0.56047	0.00722429	0.560048	0.560048	0.193536	0.334797	0.00233849
	185	1	4	4	4	4	0.560604	0.0409377	0.56047	0.560048	0.199069	0.353444	5.98783e-06
	185	1	5	7	4	4	0.827808	0.175884	0.560604	0.560048	0.300243	0.586116	4.64429e-06
	185	1	6	4	7	4	0.561275	0.24646	0.827808	0.560048	0.235314	0.448874	0.999991
	186	1	1	7	200	200	0.817929	0.549509	2.25417	2.25417	0.383494	0.291808	0.00634673
	186	1	2	7	7	200	0.818505	0.601098	0.817929	2.25417	0.396394	0.452356	1
	186	1	3	4	7	7	0.561462	0.0815048	0.818505	0.818505	0.206056	0.304311	0.999592
	186	1	4	4	4	4	0.562099	0.0441793	0.561462	0.561462	0.199967	0.355687	0.448095
	187	1	1	7	200	200	0.81331	0.0560346	2.25417	2.25417	0.270489	0.108633	0.000234589
	187	1	2	7	7	200	0.813451	0.0639072	0.81331	2.25417	0.272141	0.18013	0.0045725
	187	1	3	7	7	200	0.81589	0.306662	0.813451	2.25417	0.325412	0.285798	0.00326433
	187	1	4	7	7	200	0.817812	0.49542	0.81589	2.25417	0.370315	0.389234	0.0033396
	187	1	5	7	7	200	0.818444	0.555437	0.817812	2.25417	0.38513	0.424831	0.00433243
	187	1	6	4	7	200	0.55791	0.565996	0.818444	2.25417	0.298766	0.29243	1
	187	1	7	4	4	4	0.560264	0.00926191	0.55791	0.55791	0.193816	0.3364	0.999881
	187	1	8	7	4	4	0.827599	0.0275079	0.560264	0.560264	0.268958	0.496089	2.0386e-06
	187	1	9	7	7	4	0.827844	0.0507553	0.827599	0.560264	0.273786	0.48403	0.000327745
	187	1	10	4	7	4	0.561089	0.0556641	0.827844	0.560264	0.201627	0.337897	0.00459924
	187	1	11	4	4	4	0.561136	0.0622401	0.561089	0.560264	0.202736	0.365631	0.00982901
	187	1	12	7	4	4	0.829209	0.174587	0.561136	0.560264	0.300409	0.586041	1.05647e-05
	187	1	13	4	7	4	0.561856	0.27795	0.829209	0.560264	0.241387	0.468153	0.997722
	188	1	1	7	200	200	0.816777	0.425863	2.25417	2.25417	0.353343	0.232931	0.000573629
	188	1	2	4	7	200	0.557558	0.506256	0.816777	2.25417	0.285875	0.263096	0.000237898
	188	1	3	4	4	200	0.557592	0.511072	0.557558	2.25417	0.286904	0.28586	1
	188	1	4	7	4	4	0.830536	0.208764	0.557592	0.557592	0.30832	0.607789	0.000104513
	188	1	5	4	7	4	0.562034	0.220897	0.830536	0.557592	0.230795	0.434143	0.0105967
	188	1	6	4	4	4	0.562096	0.22562	0.562034	0.557592	0.23168	0.463292	0.743502
	189	1	1	1	200	200	-0.190183	0.0200988	2.25361	2.25361	0.0720496	0.0106978	2.31487e-06
	189	1	2	7	1	200	0.814694	0.0414942	-0.190183	2.25361	0.267944	0.236829	0.041112
	189	1	3	7	7	200	0.816573	0.227662	0.814694	2.25361	0.307959	0.248319	0.0558858
	189	1	4	7	7	7	0.817234	0.0543685	0.816573	0.816573	0.271327	0.426613	1
	189	1	5	1	7	7	-0.187469	0.0567767	0.817234	0.817234	0.0749129	0.0673329	0.000148183
	189	1	6	7	1	7	0.823782	0.0847482	-0.187469	0.817234	0.279585	0.547437	0.999946
	189	1	7	7	7	7	0.826279	0.048626	0.823782	0.823782	0.272876	0.426111	0.983825
	189	1	8	7	7	7	0.827587	0.0688174	0.826279	0.826279	0.277437	0.438212	0.000849645
	189	1	9	1	7	7	-0.186063	0.112998	0.827587	0.826279	0.0791993	0.0758978	0.0413961
	189	1	10	1	1	7	-0.185625	0.248687	-0.186063	0.826279	0.0901116	0.146089	0.135873
	189	1	11	1	1	7	-0.185452	0.284902	-0.185625	0.826279	0.0932523	0.157523	0.000388254
	189	1	12	7	1	7	0.83015	0.289441	-0.185452	0.826279	0.326264	0.66761	0.999952
	190	1	1	7	200	200	0.815483	0.129484	2.25361	2.25361	0.286412	0.127939	1.77811e-05
	190	1	2	7	7	200	0.815926	0.171349	0.815483	2.25361	0.295483	0.223185	0.00033828
	190	1	3	7	7	200	0.816827	0.259431	0.815926	2.25361	0.315089	0.26313	0.999936
	190	1	4	7	7	7	0.819017	0.0174127	0.816827	0.816827	0.264364	0.405578	1
	190	1	5	7	7	7	0.826299	0.0196357	0.819017	0.819017	0.266973	0.41032	0.987063
	190	1	6	7	7	7	0.82721	0.0137079	0.826299	0.826299	0.266045	0.405123	0.00015188
	190	1	7	7	7	7	0.827765	0.0681691	0.82721	0.826299	0.277357	0.437828	1.74532e-05
	190	1	8	7	7	7	0.828051	0.0951218	0.827765	0.826299	0.283067	0.454231	6.72802e-05
	190	1	9	7	7	7	0.829547	0.253874	0.828051	0.826299	0.318031	0.551865	0.999995
	190	1	10	7	7	7	0.832602	0.0137079	0.829547	0.829547	0.26765	0.407166	0.000381029
	191	1	1	7	200	200	0.814562	0.0312133	2.25361	2.25361	0.265825	0.103225	0.00217332
	191	1	2	7	7	200	0.818617	0.45551	0.814562	2.25361	0.361025	0.366955	0.311685
	191	1	3	1	7	200	-0.188724	0.504784	0.818617	2.25361	0.113838	0.0589527	0.940119
	191	1	4	7	1	1	0.821512	0.16292	-0.188724	-0.188724	0.295437	0.775811	0.999244
	191	1	5	7	7	7	0.822834	0.00602036	0.821512	0.821512	0.263203	0.399596	1
	191	1	6	7	7	7	0.829193	0.00435319	0.822834	0.822834	0.264747	0.401771	0.999858
	191	1	7	7	7	7	0.831034	0.0125965	0.829193	0.829193	0.266958	0.405737	0.886928
	191	1	8	7	7	7	0.831753	0.0213955	0.831034	0.831034	0.268957	0.410784	0.00497245
	192	1	1	4	200	200	0.557664	0.491252	2.24333	2.24333	0.28275	0.165045	0.00036454
	192	1	2	4	4	200	0.558179	0.648427	0.557664	2.24333	0.317016	0.361498	0.00498878
	192	1	3	4	4	200	0.558528	0.749196	0.558179	2.24333	0.340118	0.420261	0.999903
	192	1	4	4	4	4	0.559548	0.122443	0.558528	0.558528	0.212581	0.400137	0.000427862
	192	1	5	4	4	4	0.559866	0.217099	0.559548	0.558528	0.229515	0.456868	1.46231e-05
	192	1	6	1	4	4	-0.186763	0.364178	0.559866	0.558528	0.10024	0.175014	2.29431e-05
	192	1	7	1	1	4	-0.186422	0.481249	-0.186763	0.558528	0.111753	0.275271	0.000137402
	192	1	8	4	1	4	0.561464	0.71289	-0.186422	0.558528	0.332733	0.792292	0.00305995
	192	1	9	4	4	4	0.562009	0.877844	0.561464	0.558528	0.37182	0.809683	0.998436
	193	1	1	4	200	200	0.558058	0.61638	2.24333	2.24333	0.309844	0.211804	0.000729801
	193	1	2	4	4	200	0.558335	0.696589	0.558058	2.24333	0.32795	0.389166	0.280188
	193	1	3	4	4	200	0.558486	0.712982	0.558335	2.24333	0.331749	0.3988	0.999999
	193	1	4	1	4	4	-0.187018	0.0868768	0.558486	0.558486	0.0771479	0.0971765	0.000229877
	193	1	5	1	1	4	-0.186886	0.128833	-0.187018	0.558486	0.0803094	0.138089	6.43282e-05
	193	1	6	1	1	4	-0.186842	0.138651	-0.186886	0.558486	0.0810676	0.140979	0.000112173
	193	1	7	4	1	4	0.560308	0.150413	-0.186842	0.558486	0.217661	0.490019	1
	193	1	8	4	4	4	0.5621	0.0043531	0.560308	0.560308	0.193459	0.334005	0.99103
	194	1	1	1	200	200	-0.188746	0.634719	2.24333	2.24333	0.128111	0.047115	0.000349712
	194	1	2	1	1	200	-0.188316	0.776519	-0.188746	2.24333	0.145486	0.15482	1.20659e-05
	194	1	3	1	1	200	-0.187728	0.980744	-0.188316	2.24333	0.173885	0.232116	0.000497435
	194	1	4	4	1	200	0.560467	1.35187	-0.187728	2.24333	0.490875	0.810358	4.92211e-06
	194	1	5	4	4	200	0.560495	1.35669	0.560467	2.24333	0.492131	0.762846	0.999913
	194	1	6	4	4	4	0.56118	0.0121331	0.560495	0.560495	0.194499	0.337721	0.471296
	194	1	7	4	4	4	0.561347	0.0178755	0.56118	0.56118	0.195471	0.340765	0.999968
	194	1	8	4	4	4	0.562154	0.0150043	0.561347	0.561347	0.195197	0.339563	2.26699e-05
	194	1	9	4	4	4	0.562345	0.0718725	0.562154	0.561347	0.20465	0.371456	0.0223445
	195	1	1	7	200	200	0.817598	0.415035	2.24284	2.24284	0.351073	0.231084	0.00122884
	195	1	2	7	7	200	0.819399	0.599628	0.817598	2.24284	0.396356	0.454426	0.000563371
	195	1	3	7	7	200	0.819518	0.605741	0.819399	2.24284	0.397913	0.458029	0.000532843
	195	1	4	7	7	200	0.822589	0.93223	0.819518	2.24284	0.482051	0.654223	0.00167822
	195	1	5	1	7	200	-0.187162	1.12803	0.822589	2.24284	0.197	0.225481	0.00118343
	195	1	6	7	1	200	0.824674	1.14304	-0.187162	2.24284	0.537273	0.825828	0.997987
	195	1	7	1	7	7	-0.186529	0.0856744	0.824674	0.824674	0.0771123	0.0714356	1.50043e-05
	195	1	8	1	1	7	-0.186317	0.156807	-0.186529	0.824674	0.0825379	0.120207	0.0040215
	195	1	9	7	1	7	0.827855	0.214973	-0.186317	0.824674	0.30882	0.625176	0.999999
	196	1	1	1	200	200	-0.189647	0.269898	2.24284	2.24284	0.091417	0.0198208	0.000180291
	196	1	2	7	1	200	0.818747	0.530904	-0.189647	2.24284	0.379248	0.511448	2.52206e-05
	196	1	3	7	7	200	0.819114	0.565636	0.818747	2.24284	0.387873	0.433622	0.000107035
	196	1	4	1	7	200	-0.188754	0.57036	0.819114	2.24284	0.120857	0.0690859	8.83133e-05
	196	1	5	7	1	200	0.823751	1.05569	-0.188754	2.24284	0.514404	0.792674	1
	196	1	6	7	7	7	0.828789	0.0035196	0.823751	0.823751	0.26446	0.400779	0.000696956
	196	1	7	7	7	7	0.829912	0.117907	0.828789	0.823751	0.288454	0.469607	5.81181e-05
	197	1	1	7	200	200	0.815807	0.223217	2.24284	2.24284	0.306733	0.157666	0.0190365
	197	1	2	7	7	200	0.816887	0.325378	0.815807	2.24284	0.330011	0.297556	0.996832
	197	1	3	7	7	7	0.819388	0.16292	0.816887	0.816887	0.294765	0.493634	0.204725
	197	1	4	7	7	7	0.819766	0.184686	0.819388	0.816887	0.299587	0.50692	1
	197	1	5	7	7	7	0.831286	0.0699289	0.819766	0.819766	0.278798	0.443018	0.00325418
	198	1	1	7	200	200	0.815138	0.151806	2.24284	2.24284	0.291045	0.135641	0.00912892
	198	1	2	1	7	200	-0.188694	0.599628	0.815138	2.24284	0.12412	0.0739531	0.999984
	198	1	3	1	1	1	-0.187919	0.00453843	-0.188694	-0.188694	0.0712084	0.183185	0.696883
	198	1	4	1	1	1	-0.187747	0.00722444	-0.187919	-0.187919	0.0714097	0.184084	5.71492e-06
	198	1	5	7	1	1	0.823068	0.0599258	-0.187747	-0.187919	0.274227	0.729474	1
	1	2	1	4	200	200	0.735792	0.0263965	2.29572	2.29572	0.242191	0.0824278	0.708799
	1	2	2	4	4	4	0.743607	0.0380665	0.735792	0.735792	0.246615	0.399987	0.00038236
	1	2	3	4	4	4	0.745719	0.0550158	0.743607	0.735792	0.250489	0.410422	0.00607438
	1	2	4	4	4	4	0.748608	0.0779853	0.745719	0.735792	0.255811	0.425524	0.00282069
	1	2	5	4	4	4	0.751041	0.0971575	0.748608	0.735792	0.260316	0.438142	0.999974
	1	2	6	7	4	4	1.02803	0.119942	0.751041	0.751041	0.354469	0.607661	0.000157203
	1	2	7	4	7	4	0.786048	0.143652	1.02803	0.751041	0.280296	0.455845	0.00529771
	1	2	8	7	4	4	1.03689	0.192555	0.786048	0.751041	0.374987	0.650656	0.0625943
	1	2	9	7	7	4	1.04365	0.244607	1.03689	0.751041	0.390131	0.660569	0.030538
	1	2	10	7	7	4	1.04712	0.264242	1.04365	0.751041	0.396234	0.672446	0.0735688
	1	2	11	7	7	4	1.0508	0.281284	1.04712	0.751041	0.401803	0.683122	1
	2	2	1	4	200	200	0.743965	0.114292	2.29572	2.29572	0.261659	0.101951	0.943516
	2	2	2	4	4	200	0.751292	0.13189	0.743965	2.29572	0.267367	0.18212	0.805547
	2	2	3	7	4	4	1.00471	0.102992	0.751292	0.751292	0.342435	0.584538	1
	2	2	4	7	7	7	1.05617	0.0091693	1.00471	1.00471	0.338223	0.478413	0.999999
	2	2	5	7	7	7	1.10449	0.0828004	1.05617	1.05617	0.372482	0.53534	1
	3	2	1	4	200	200	0.733307	0	2.29572	2.29572	0.236533	0.0772596	1.51951e-05
	3	2	2	7	4	200	1.00327	0.322778	0.733307	2.29572	0.394761	0.390674	1
	3	2	3	7	7	7	1.09346	0.00639064	1.00327	1.00327	0.350376	0.498842	1
	4	2	1	4	200	200	0.751334	0.194963	2.29572	2.29572	0.280351	0.123337	0.0806065
	4	2	2	4	4	4	0.757746	0.0542748	0.751334	0.751334	0.253794	0.412785	0.00920147
	4	2	3	4	4	4	0.768498	0.162269	0.757746	0.751334	0.278798	0.483569	5.3372e-05
	4	2	4	7	4	4	1.01204	0.178755	0.768498	0.751334	0.362863	0.631117	1
	4	2	5	7	7	7	1.07753	0.0561265	1.01204	1.01204	0.356594	0.51724	0.999804
	4	2	6	7	7	7	1.09469	0.0111141	1.07753	1.07753	0.351915	0.479161	0.869779
	4	2	7	4	7	7	0.850989	0.102435	1.09469	1.09469	0.291761	0.389708	0.999952
	4	2	8	4	4	4	0.868016	0.0132444	0.850989	0.850989	0.278243	0.420351	0.00154827
	4	2	9	7	4	4	1.12888	0.0213021	0.868016	0.850989	0.36631	0.574112	0.00266949
	4	2	10	4	7	4	0.87028	0.0285263	1.12888	0.850989	0.282125	0.404065	0.00390281
	4	2	11	7	4	4	1.13258	0.0485318	0.87028	0.850989	0.374188	0.592179	0.99998
	5	2	1	1	200	200	0.0206434	0	2.29572	2.29572	0.0948552	0.0156976	0.0661989
	5	2	2	7	1	200	0.972297	0.0866009	0.0206434	2.29572	0.327677	0.307334	1
	5	2	3	7	7	7	1.04733	0.0152825	0.972297	0.972297	0.33663	0.487168	0.984798
	5	2	4	7	7	7	1.06021	0.055758	1.04733	1.04733	0.350489	0.495877	1
	6	2	1	7	200	200	0.959098	0	2.29572	2.29572	0.303993	0.124031	1
	6	2	2	7	7	7	1.0738	0.0219509	0.959098	0.959098	0.34724	0.51078	1
	7	2	1	7	200	200	0.967895	0.0751159	2.29572	2.29572	0.323598	0.147979	1
	8	2	1	7	200	200	0.981969	0.198487	2.29572	2.29572	0.357029	0.1953	0.999998
	8	2	2	7	7	7	1.02428	0.0195431	0.981969	0.981969	0.32982	0.473354	1
	8	2	3	7	7	7	1.08101	0.0070391	1.02428	1.02428	0.346231	0.485409	0.999174
	8	2	4	1	7	7	0.101236	0.0568685	1.08101	1.08101	0.111615	0.0921705	0.00752984
	8	2	5	1	1	7	0.103444	0.0888224	0.101236	1.08101	0.115277	0.139832	0.00265
	9	2	1	1	200	200	0.0258393	0.0890996	2.2857	2.2857	0.103801	0.0199229	0.000334618
	9	2	2	1	1	200	0.0296101	0.141059	0.0258393	2.2857	0.109465	0.0538452	0.0342942
	9	2	3	1	1	200	0.0353489	0.217748	0.0296101	2.2857	0.118348	0.0649616	6.64205e-05
	9	2	4	1	1	200	0.0398224	0.284989	0.0353489	2.2857	0.126549	0.0762708	0.167983
	9	2	5	1	1	1	0.0416917	0.00463096	0.0398224	0.0398224	0.0980625	0.223187	0.93407
	9	2	6	1	1	1	0.0468609	0.0225065	0.0416917	0.0416917	0.100418	0.232585	0.999637
	9	2	7	1	1	1	0.0577108	0.0192648	0.0468609	0.0468609	0.101612	0.234523	0.996962
	9	2	8	1	1	1	0.0705711	0.108364	0.0577108	0.0577108	0.112273	0.27916	0.00149556
	9	2	9	1	1	1	0.0735384	0.150599	0.0705711	0.0577108	0.117167	0.300803	0.00423304
	9	2	10	1	1	1	0.0747501	0.161435	0.0735384	0.0577108	0.118524	0.306759	0.0453897
	9	2	11	1	1	1	0.0786973	0.214413	0.0747501	0.0577108	0.125024	0.336934	0.026218
	9	2	12	1	1	1	0.0808818	0.024535	0.0786973	0.0786973	0.105388	0.239379	0.999649
	9	2	13	1	1	1	0.0903528	0.00602016	0.0808818	0.0808818	0.104941	0.234676	0.000284917
	9	2	14	1	1	1	0.0914378	0.0189867	0.0903528	0.0808818	0.106364	0.240199	0.00949539
	9	2	15	1	1	1	0.0981451	0.131332	0.0914378	0.0808818	0.11899	0.29702	0.041736
	9	2	16	1	1	1	0.102859	0.0726124	0.0981451	0.0981451	0.113488	0.266643	0.0100341
	9	2	17	1	1	1	0.104428	0.0881722	0.102859	0.0981451	0.115361	0.274509	1
	10	2	1	1	200	200	0.0254112	0.0823384	2.2857	2.2857	0.103092	0.0195833	0.000248819
	10	2	2	1	1	200	0.03374	0.20404	0.0254112	2.2857	0.116624	0.0628311	0.00633371
	10	2	3	1	1	200	0.0353202	0.218396	0.03374	2.2857	0.118413	0.0649547	0.0229291
	10	2	4	1	1	200	0.0370433	0.232381	0.0353202	2.2857	0.120208	0.0672763	1
	10	2	5	1	1	1	0.083672	0.00750205	0.0370433	0.0370433	0.104133	0.242504	0.00483065
	10	2	6	1	1	1	0.0903528	0.113364	0.083672	0.0370433	0.115836	0.292583	0.00026049
	10	2	7	1	1	1	0.0908881	0.116791	0.0903528	0.0370433	0.116283	0.294032	0.00244567
	10	2	8	1	1	1	0.0917603	0.121885	0.0908881	0.0370433	0.116962	0.297005	0.00148888
	10	2	9	1	1	1	0.0926208	0.128461	0.0917603	0.0370433	0.117803	0.300723	0.0344927
	10	2	10	1	1	1	0.0966735	0.18857	0.0926208	0.0370433	0.125091	0.334546	0.000872319
	10	2	11	1	1	1	0.0982692	0.209594	0.0966735	0.0370433	0.127761	0.346572	0.0239904
	10	2	12	1	1	1	0.108755	0.391033	0.0982692	0.0370433	0.152219	0.458486	0.999999
	11	2	1	1	200	200	0.03091	0.169678	2.2857	2.2857	0.112582	0.0244396	2.97519e-05
	11	2	2	1	1	200	0.0369404	0.262112	0.03091	2.2857	0.123481	0.0720877	0.000143951
	11	2	3	1	1	200	0.0380077	0.273412	0.0369404	2.2857	0.124929	0.0739659	0.000164834
	11	2	4	1	1	200	0.0499554	0.4643	0.0380077	2.2857	0.150465	0.115794	0.000275111
	11	2	5	1	1	200	0.0530224	0.507738	0.0499554	2.2857	0.156914	0.127396	0.00082903
	11	2	6	1	1	200	0.0586631	0.595634	0.0530224	2.2857	0.170529	0.15483	0.000151552
	11	2	7	1	1	200	0.0594072	0.601839	0.0586631	2.2857	0.1716	0.156762	0.00148215
	11	2	8	1	1	200	0.0602258	0.607396	0.0594072	2.2857	0.172596	0.158782	0.993883
	11	2	9	1	1	1	0.0702854	0.070761	0.0602258	0.0602258	0.108413	0.26029	0.000765257
	11	2	10	1	1	1	0.0738325	0.128648	0.0702854	0.0602258	0.114885	0.289349	0.00188126
	11	2	11	1	1	1	0.0813102	0.252285	0.0738325	0.0602258	0.129821	0.358923	0.000897943
	11	2	12	1	1	1	0.0820577	0.257657	0.0813102	0.0602258	0.130579	0.361672	0.00615838
	11	2	13	1	1	1	0.0870914	0.338698	0.0820577	0.0602258	0.141319	0.411344	0.0119878
	11	2	14	1	1	1	0.0908376	0.395658	0.0870914	0.0602258	0.149342	0.447119	0.999882
	11	2	15	1	1	1	0.101739	0.00546446	0.0908376	0.0908376	0.106524	0.236954	0.992125
	11	2	16	1	1	1	0.10711	0.00685373	0.101739	0.101739	0.107442	0.237355	0.105287
	11	2	17	1	1	1	0.108634	0.0137075	0.10711	0.101739	0.108347	0.240664	0.516715
	11	2	18	1	1	1	0.111353	0.0141705	0.108634	0.108634	0.108794	0.240834	0.0289614
	11	2	19	1	1	1	0.112358	0.0206538	0.111353	0.108634	0.109595	0.243979	0.0243747
	11	2	20	1	1	1	0.114266	0.0419559	0.112358	0.108634	0.112052	0.254487	0.999997
	12	2	1	1	200	200	0.0201627	0	2.2857	2.2857	0.0947924	0.0158755	0.00521467
	12	2	2	1	1	200	0.0238474	0.0440867	0.0201627	2.2857	0.0992779	0.042504	0.0020695
	12	2	3	1	1	200	0.0305911	0.135594	0.0238474	2.2857	0.10906	0.0533229	0.0115045
	12	2	4	1	1	200	0.032437	0.153007	0.0305911	2.2857	0.1111	0.0556004	0.00768403
	12	2	5	1	1	200	0.0341025	0.168474	0.032437	2.2857	0.112943	0.0577924	0.045859
	12	2	6	1	1	200	0.0367861	0.191351	0.0341025	2.2857	0.115752	0.0612371	0.0140194
	12	2	7	1	1	200	0.0403443	0.236364	0.0367861	2.2857	0.121178	0.0683411	0.693237
	12	2	8	1	1	200	0.0438174	0.246182	0.0403443	2.2857	0.122832	0.0703216	0.0419664
	12	2	9	1	1	200	0.0503767	0.338152	0.0438174	2.2857	0.134611	0.0876365	0.964822
	12	2	10	1	1	1	0.0559203	0.0236179	0.0503767	0.0503767	0.101775	0.234895	0.00277304
	12	2	11	1	1	1	0.0577108	0.0430679	0.0559203	0.0503767	0.103882	0.24392	0.0778223
	12	2	12	1	1	1	0.060242	0.0642777	0.0577108	0.0503767	0.106307	0.254599	0.0681974
	12	2	13	1	1	1	0.0618368	0.0760403	0.060242	0.0503767	0.107701	0.260621	0.816428
	12	2	14	1	1	1	0.0648803	0.00537191	0.0618368	0.0618368	0.101296	0.228104	0.0409523
	12	2	15	1	1	1	0.0687479	0.0537191	0.0648803	0.0618368	0.106498	0.251061	0.00253309
	12	2	16	1	1	1	0.0703648	0.0713167	0.0687479	0.0618368	0.10848	0.259673	0.0049616
	12	2	17	1	1	1	0.0726498	0.102159	0.0703648	0.0618368	0.111949	0.275373	0.999997
	12	2	18	1	1	1	0.0966685	0.0858568	0.0726498	0.0726498	0.11392	0.276533	7.40751e-05
	12	2	19	1	1	1	0.0985916	0.116143	0.0966685	0.0726498	0.117423	0.290564	0.00490515
	12	2	20	1	1	1	0.0999035	0.12985	0.0985916	0.0726498	0.119109	0.298005	0.00581292
	12	2	21	1	1	1	0.109389	0.298785	0.0999035	0.0726498	0.140428	0.396057	0.99955
	12	2	22	1	1	1	0.11906	0.0303787	0.109389	0.109389	0.111587	0.251341	0.0735933
	12	2	23	1	1	1	0.12067	0.0414928	0.11906	0.109389	0.112977	0.256478	0.388971
	12	2	24	1	1	1	0.124732	0.0471425	0.12067	0.12067	0.114187	0.258954	0.00199916
	12	2	25	1	1	1	0.128177	0.107622	0.124732	0.12067	0.121225	0.289663	0.989473
	13	2	1	4	200	200	0.724574	0.0159309	2.2857	2.2857	0.23711	0.0795154	0.00250564
	13	2	2	4	4	200	0.736967	0.136802	0.724574	2.2857	0.264107	0.18137	0.000386463
	13	2	3	4	4	200	0.738266	0.145693	0.736967	2.2857	0.266284	0.18434	0.275524
	13	2	4	4	4	200	0.741367	0.150973	0.738266	2.2857	0.268277	0.187309	0.08358
	13	2	5	4	4	200	0.749227	0.218031	0.741367	2.2857	0.284536	0.216453	0.0240777
	13	2	6	4	4	200	0.751212	0.226552	0.749227	2.2857	0.286951	0.220269	1
	13	2	7	4	4	4	0.845326	0.0325095	0.751212	0.751212	0.275323	0.449725	1
	14	2	1	4	200	200	0.72711	0.0423279	2.2857	2.2857	0.242792	0.0848298	4.35854e-05
	14	2	2	4	4	200	0.732356	0.0909541	0.72711	2.2857	0.253665	0.163693	0.999028
	14	2	3	4	4	4	0.747851	0.0324175	0.732356	0.732356	0.246729	0.400075	0.895016
	14	2	4	4	4	4	0.760945	0.0916951	0.747851	0.747851	0.262133	0.438047	0.332349
	14	2	5	4	4	4	0.763563	0.0965114	0.760945	0.747851	0.263871	0.441175	1
	14	2	6	4	4	4	0.862307	0.00527933	0.763563	0.763563	0.274858	0.439204	0.999985
	14	2	7	4	4	4	0.881859	0.00583504	0.862307	0.862307	0.28094	0.420321	0.0755725
	15	2	1	4	200	200	0.729242	0.0646497	2.2857	2.2857	0.247665	0.0895709	0.00157206
	15	2	2	4	4	200	0.740886	0.179315	0.729242	2.2857	0.273925	0.198484	0.999793
	15	2	3	4	4	4	0.759877	0.0307503	0.740886	0.740886	0.249821	0.403247	0.0102363
	15	2	4	4	4	4	0.763081	0.0554802	0.759877	0.740886	0.255571	0.417876	0.00626423
	15	2	5	4	4	4	0.765094	0.0676136	0.763081	0.740886	0.258552	0.42595	1
	15	2	6	4	4	4	0.810109	0.0371411	0.765094	0.765094	0.265699	0.42805	0.00426658
	15	2	7	4	4	4	0.816962	0.115405	0.810109	0.765094	0.283902	0.474977	0.000376231
	15	2	8	4	4	4	0.81988	0.147173	0.816962	0.765094	0.291545	0.495409	0.508412
	15	2	9	4	4	4	0.823476	0.017042	0.81988	0.81988	0.26561	0.406938	1
	16	2	1	4	200	200	0.734148	0.116425	2.2857	2.2857	0.259208	0.101489	0.000275545
	16	2	2	4	4	200	0.736577	0.131985	0.734148	2.2857	0.263025	0.178936	0.0275102
	16	2	3	4	4	200	0.741461	0.168756	0.736577	2.2857	0.271932	0.194161	0.129518
	16	2	4	4	4	200	0.74402	0.176629	0.741461	2.2857	0.274321	0.19783	0.999975
	16	2	5	4	4	4	0.767598	0.00796543	0.74402	0.74402	0.247612	0.39325	0.926658
	16	2	6	4	4	4	0.773361	0.00750233	0.767598	0.767598	0.249159	0.389128	0.995921
	16	2	7	4	4	4	0.783216	0.0128744	0.773361	0.773361	0.253023	0.396005	1
	17	2	1	7	200	200	0.970784	0.0820606	2.27537	2.27537	0.326137	0.154297	0.000539119
	17	2	2	7	7	200	0.972233	0.0855801	0.970784	2.27537	0.327422	0.236229	1
	17	2	3	4	7	7	0.876135	0.0470499	0.972233	0.972233	0.287844	0.408088	0.0117784
	17	2	4	7	4	7	1.14486	0.137538	0.876135	0.972233	0.400458	0.625465	0.958353
	18	2	1	7	200	200	0.964055	0.024081	2.27537	2.27537	0.310901	0.134842	0.0116431
	18	2	2	7	7	200	0.973602	0.0974353	0.964055	2.27537	0.330589	0.242575	0.877278
	18	2	3	7	7	7	0.982227	0.0253776	0.973602	0.973602	0.317144	0.45518	0.0208388
	18	2	4	7	7	7	1.02738	0.433087	0.982227	0.973602	0.431293	0.714931	1
	19	2	1	4	200	200	0.740514	0.125592	2.27537	2.27537	0.262904	0.10616	0.0305072
	19	2	2	4	4	200	0.743121	0.134853	0.740514	2.27537	0.265537	0.183178	0.999995
	19	2	3	4	4	4	0.773558	0.0146338	0.743121	0.743121	0.250598	0.400746	0.36251
	19	2	4	4	4	4	0.776948	0.00555715	0.773558	0.773558	0.249804	0.388203	1
	20	2	1	7	200	200	0.969534	0.0712241	2.27537	2.27537	0.323263	0.150496	0.999988
	20	2	2	7	7	7	1.02001	0.17857	0.969534	0.969534	0.365626	0.571523	1
	20	2	3	7	7	7	1.0999	0.0141705	1.02001	1.02001	0.354449	0.502097	1
	21	2	1	1	200	200	0.037033	0.309355	2.27537	2.27537	0.128884	0.0349642	0.0582601
	21	2	2	4	1	200	0.755778	0.34344	0.037033	2.27537	0.313802	0.336933	0.999948
	21	2	3	4	4	4	0.783037	0.0884533	0.755778	0.755778	0.268026	0.446316	1
	21	2	4	4	4	4	0.828948	0.0139856	0.783037	0.783037	0.266618	0.419421	0.0410563
	21	2	5	4	4	4	0.830838	0.0258409	0.828948	0.783037	0.269588	0.423139	0.072174
	21	2	6	4	4	4	0.860725	0.417067	0.830838	0.783037	0.366647	0.671754	0.999993
	22	2	1	1	200	200	0.0381799	0.327972	2.27537	2.27537	0.13126	0.0366282	0.163464
	22	2	2	1	1	200	0.0427599	0.381415	0.0381799	2.27537	0.138521	0.0959026	0.000213804
	22	2	3	1	1	200	0.0438018	0.388732	0.0427599	2.27537	0.139617	0.0975202	0.277043
	22	2	4	4	1	200	0.775358	0.527756	0.0438018	2.27537	0.363087	0.454345	1
	23	2	1	1	200	200	0.0277414	0.160327	2.27537	2.27537	0.111142	0.0240308	0.0192644
	23	2	2	4	1	200	0.751405	0.296388	0.0277414	2.27537	0.302016	0.310322	1
	23	2	3	4	4	4	0.831208	0.0301014	0.751405	0.751405	0.270568	0.440098	0.99999
	23	2	4	4	4	4	0.855965	0.0439018	0.831208	0.831208	0.280938	0.437937	0.999998
	24	2	1	1	200	200	0.0349082	0.274993	2.27537	2.27537	0.124593	0.0320817	0.0137443
	24	2	2	4	1	200	0.762649	0.423928	0.0349082	2.27537	0.33432	0.38622	0.999997
	24	2	3	4	4	4	0.793957	0.0157456	0.762649	0.762649	0.256689	0.406928	0.00214644
	24	2	4	4	4	4	0.796837	0.0394567	0.793957	0.762649	0.262242	0.419618	0.999998
	24	2	5	4	4	4	0.828288	0.0196354	0.796837	0.796837	0.267566	0.418197	0.00477725
	24	2	6	1	4	4	0.0946228	0.0771523	0.828288	0.796837	0.112703	0.129093	0.000302707
	24	2	7	1	1	4	0.0967044	0.109569	0.0946228	0.796837	0.116425	0.1773	0.00156287
	24	2	8	4	1	4	0.847194	0.248499	0.0967044	0.796837	0.322665	0.634279	1
	25	2	1	4	200	200	0.751292	0.176995	2.26492	2.26492	0.276604	0.122753	1
	25	2	2	4	4	4	0.802186	0.108179	0.751292	0.751292	0.277853	0.470754	0.999682
	25	2	3	4	4	4	0.818321	0.0394558	0.802186	0.802186	0.268613	0.422727	0.00142596
	25	2	4	4	4	4	0.819921	0.0527003	0.818321	0.802186	0.271794	0.430003	0.0275419
	25	2	5	1	4	4	0.0859226	0.059554	0.819921	0.802186	0.109597	0.122003	7.48983e-05
	25	2	6	1	1	4	0.088498	0.101232	0.0859226	0.802186	0.114271	0.171448	0.0393995
	25	2	7	1	1	4	0.0913911	0.140131	0.088498	0.802186	0.118867	0.186258	0.00198307
	25	2	8	4	1	4	0.830129	0.146892	0.0913911	0.802186	0.294715	0.56459	1
	26	2	1	4	200	200	0.734956	0	2.26492	2.26492	0.236986	0.0803432	0.00716283
	26	2	2	4	4	200	0.736677	0.00889144	0.734956	2.26492	0.239129	0.141004	0.00377805
	26	2	3	4	4	200	0.738262	0.0160231	0.736677	2.26492	0.240914	0.1435	0.00384115
	26	2	4	4	4	200	0.743128	0.0582574	0.738262	2.26492	0.250379	0.158093	0.005695
	26	2	5	1	4	200	0.0332372	0.0754846	0.743128	2.26492	0.103538	0.0361223	0.360553
	26	2	6	4	1	200	0.752766	0.115403	0.0332372	2.26492	0.264476	0.225925	0.017237
	26	2	7	4	4	200	0.769802	0.296381	0.752766	2.26492	0.307945	0.262402	0.032295
	26	2	8	1	4	200	0.0510671	0.304161	0.769802	2.26492	0.130688	0.0633521	0.203051
	26	2	9	1	1	200	0.0598233	0.429938	0.0510671	2.26492	0.14786	0.110929	0.00591305
	26	2	10	1	1	200	0.0608899	0.437348	0.0598233	2.26492	0.149033	0.112632	0.992599
	26	2	11	1	1	1	0.0710347	0.0825237	0.0608899	0.0608899	0.109706	0.266047	4.38642e-05
	26	2	12	1	1	1	0.0750052	0.147728	0.0710347	0.0608899	0.117091	0.299432	1
	26	2	13	4	1	1	0.852426	0.0133369	0.0750052	0.0750052	0.273525	0.6494	0.981203
	26	2	14	4	4	4	0.858354	0.0112993	0.852426	0.852426	0.2749	0.413291	0.999999
	27	2	1	4	200	200	0.744076	0.0979911	2.26492	2.26492	0.258447	0.101861	0.137995
	27	2	2	4	4	200	0.752373	0.165233	0.744076	2.26492	0.274503	0.199164	0.000807731
	27	2	3	4	4	200	0.76786	0.330465	0.752373	2.26492	0.314871	0.277983	1
	27	2	4	4	4	4	0.822214	0.0443552	0.76786	0.76786	0.270777	0.438447	0.999958
	27	2	5	4	4	4	0.841455	0.0224135	0.822214	0.822214	0.272077	0.419557	0.00484708
	27	2	6	4	4	4	0.851202	0.146892	0.841455	0.822214	0.30142	0.498762	1
	28	2	1	1	200	200	0.0331104	0.113273	2.26492	2.26492	0.107204	0.0220183	0.001244
	28	2	2	1	1	200	0.0374471	0.175976	0.0331104	2.26492	0.114236	0.0602204	0.000807025
	28	2	3	4	1	200	0.766785	0.337412	0.0374471	2.26492	0.316069	0.341344	0.999941
	28	2	4	1	4	4	0.0611927	0.00759477	0.766785	0.766785	0.100995	0.108435	0.000128451
	28	2	5	1	1	4	0.0633543	0.0389	0.0611927	0.766785	0.10428	0.148526	0.00116596
	28	2	6	4	1	4	0.790448	0.0438089	0.0633543	0.766785	0.261234	0.489195	0.999995
	28	2	7	4	4	4	0.81701	0.00379738	0.790448	0.790448	0.261045	0.404402	0.934465
	28	2	8	4	4	4	0.822029	0.0052792	0.81701	0.81701	0.262817	0.400067	0.9995
	28	2	9	4	4	4	0.83933	0.0776135	0.822029	0.822029	0.282874	0.451591	0.00161917
	28	2	10	1	4	4	0.108216	0.246178	0.83933	0.822029	0.133781	0.183947	0.0001489
	28	2	11	4	1	4	0.854555	0.274241	0.108216	0.822029	0.330985	0.646691	1
	29	2	1	7	200	200	0.963676	0.0213956	2.26492	2.26492	0.310183	0.135503	0.0339203
	29	2	2	7	7	200	0.970262	0.0626122	0.963676	2.26492	0.321558	0.227504	0.999872
	29	2	3	7	7	7	1.00242	0.0967896	0.970262	0.970262	0.340209	0.511532	0.99999
	29	2	4	7	7	7	1.03517	0.0197284	1.00242	1.00242	0.333533	0.473386	0.999999
	29	2	5	7	7	7	1.08229	0.0702982	1.03517	1.03517	0.361635	0.521416	1
	29	2	6	7	7	7	1.14582	0.0779856	1.08229	1.08229	0.386108	0.548151	0.875847
	30	2	1	7	200	200	0.974798	0.117629	2.26492	2.26492	0.335633	0.16913	0.999999
	30	2	2	7	7	7	1.02422	0.0344552	0.974798	0.974798	0.333219	0.484672	1
	31	2	1	7	200	200	0.970197	0.0775243	2.26492	2.26492	0.324911	0.154381	0.00741577
	31	2	2	7	7	200	0.973804	0.0973453	0.970197	2.26492	0.330636	0.243827	0.999999
	31	2	3	7	7	7	1.02937	0.0618712	0.973804	0.973804	0.341306	0.504743	1
	31	2	4	1	7	7	0.0947167	0.135502	1.02937	1.02937	0.118895	0.114519	0.00114203
	31	2	5	1	1	7	0.102289	0.268596	0.0947167	1.02937	0.135431	0.208738	0.0184086
	31	2	6	7	1	7	1.10637	0.335653	0.102289	1.02937	0.436052	0.762215	1
	32	2	1	1	200	200	0.0226911	0.0145416	2.26492	2.26492	0.0964253	0.016966	0.00175231
	32	2	2	1	1	200	0.0337456	0.179871	0.0226911	2.26492	0.114074	0.0605061	0.0171861
[truncated: 170,499 more rows]
