# Supplementary material for: Accept–reject decision-making revealed via a quantitative and ethological study of C. elegans foraging
Source: eLife. 2025 Sep 10;13:RP103191. doi: 10.7554/eLife.103191 (PMC12422737; doi:10.7554/eLife.103191)
Supplement: Figure 4—source data 4. [file elife-103191-fig4-data4.xlsx]

## Sheet: Sheet1
Figure 4 - Source Data 4
Figure 4G - Probability of exploitation occurring for the first time as a function of the number of encounters for animals with sensory mutations
Probability distributions
	label	encounter #	well-fed	mec-4	osm-6		* probability of exploitation occurring for the first time as a function of the number of encounters
	1	1	0.0842857	0.165625	0.721311		* exploitation events were simulated for 100 replicates using the p(exploit) and p(sense) as described in methods, Figure 2H, and Figure 2 - supplement 6
	1	2	0.194286	0.128125	0.192996
	1	3	0.293571	0.230625	0.0663189
	1	4	0.0857143	0.120625	0.00447094
	1	5	0.0421429	0.07125	0.000745156
	1	6	0.0471429	0.05	0
	1	7	0.0892857	0.005	0
	1	8	0.0371429	0.03125	0
	1	9	0.00928571	0.03875	0
	1	10	0.0142857	0.02125	0
	1	11	0	0.015625	0
	1	12	0	0	0
	1	13	0	0	0
	1	14	0	0.000625	0
	1	15	0	0	0
	10	1	0.296435	0.335625	0.870767
	10	2	0.189493	0.290625	0.0670352
	10	3	0.268293	0.215625	0.00276434
	10	4	0.0712946	0.12375	0
	10	5	0.0619137	0.00125	0
	10	6	0.0631645	0.003125	0
	10	7	0.0312695	0.03	0
	10	8	0.0162602	0	0
	10	9	0	0	0
	10	10	0	0	0
	10	11	0	0	0
	10	12	0	0	0
	10	13	0	0	0
	10	14	0	0	0
	10	15	0	0	0
Source Data
	strain	label	worm #	replicate #	sensed encounter #	p(exploit)		* observed probability of exploitation estimated using GMM classifier as described in methods, Figure 2H, and Figure 2 - supplement 6
	mec-4	5	1	1	1	0.999973		* exploitations were simulated from a Bernoulli distribution of these probabilities
	mec-4	5	1	1	2	0.999999
	mec-4	5	1	1	3	0.0547538
	mec-4	5	1	1	4	0.00191844
	mec-4	5	1	1	5	7.46544e-05
	mec-4	5	1	1	6	0.999904
	mec-4	5	2	1	1	1
	mec-4	5	2	1	2	0.00558375
	mec-4	5	3	1	1	0.245398
	mec-4	5	3	1	2	0.165659
	mec-4	5	3	1	3	7.62142e-06
	mec-4	5	3	1	4	0.999528
	mec-4	5	3	1	5	0.0329165
	mec-4	5	3	1	6	1
	mec-4	5	3	1	7	0.98376
	mec-4	5	4	1	1	0.000600626
	mec-4	5	4	1	2	0.999714
	mec-4	5	5	1	1	0.243805
	mec-4	5	5	1	2	1
	mec-4	5	5	1	3	2.4734e-05
	mec-4	5	5	1	4	0.999268
	mec-4	5	5	1	5	0.0031716
	mec-4	5	5	1	6	0.997452
	mec-4	5	6	1	1	0.00229417
	mec-4	5	6	1	2	0.00446944
	mec-4	5	6	1	3	0.998505
	mec-4	5	6	1	4	0.00117288
	mec-4	5	6	1	5	0.999943
	mec-4	5	6	1	6	0.00144965
	mec-4	5	6	1	7	0.00012799
	mec-4	5	6	1	8	0.959732
	mec-4	5	7	1	1	0.999996
	mec-4	5	7	1	2	0.0360132
	mec-4	5	7	1	3	9.88262e-05
	mec-4	5	7	1	4	0.00232479
	mec-4	5	7	1	5	0.993254
	mec-4	5	7	1	6	0.000225491
	mec-4	5	7	1	7	3.16325e-05
	mec-4	5	7	1	8	0.0010996
	mec-4	5	8	1	1	4.42988e-06
	mec-4	5	8	1	2	0.000140375
	mec-4	5	8	1	3	1
	mec-4	5	9	1	1	0.0370058
	mec-4	5	9	1	2	0.000734296
	mec-4	5	9	1	3	0.999999
	mec-4	5	9	1	4	0.999769
	mec-4	5	9	1	5	0.999714
	mec-4	5	10	1	1	0.999999
	mec-4	5	10	1	2	0.734187
	mec-4	5	10	1	3	0.999996
	mec-4	5	11	1	1	1
	mec-4	5	12	1	1	1
	mec-4	5	13	1	1	1.593e-05
	mec-4	5	13	1	2	0.996206
	mec-4	5	13	1	3	0.000137059
	mec-4	5	13	1	4	0.295582
	mec-4	5	13	1	5	0.518747
	mec-4	5	13	1	6	0.0119024
	mec-4	5	13	1	7	1
	mec-4	5	13	1	8	0.0153006
	mec-4	5	14	1	1	0.0414836
	mec-4	5	14	1	2	0.23292
	mec-4	5	14	1	3	0.999606
	mec-4	5	14	1	4	1
	mec-4	5	15	1	1	0.999999
	mec-4	5	15	1	2	0.649637
	mec-4	5	15	1	3	0.000377147
	mec-4	5	15	1	4	0.0862519
	mec-4	5	15	1	5	0.99969
	mec-4	5	16	1	1	0.0919316
	mec-4	5	16	1	2	1
	mec-4	5	16	1	3	0.999959
	mec-4	5	17	1	1	1
	mec-4	5	18	1	1	0.0033308
	mec-4	5	18	1	2	0.00730978
	mec-4	5	18	1	3	1
	mec-4	5	18	1	4	0.99997
	mec-4	5	19	1	1	1
	mec-4	5	20	1	1	0.999964
	mec-4	5	20	1	2	0.0089397
	mec-4	5	20	1	3	0.999967
	mec-4	5	20	1	4	0.999997
	mec-4	5	21	1	1	0.999994
	mec-4	5	21	1	2	0.0100265
	mec-4	5	21	1	3	0.00933758
	mec-4	5	21	1	4	0.277368
	mec-4	5	21	1	5	1
	mec-4	5	22	1	1	7.52533e-05
	mec-4	5	22	1	2	0.00485623
	mec-4	5	22	1	3	9.67199e-05
	mec-4	5	22	1	4	0.000110081
	mec-4	5	22	1	5	0.00244451
	mec-4	5	22	1	6	0.207108
	mec-4	5	22	1	7	3.47677e-05
	mec-4	5	22	1	8	0.000130445
	mec-4	5	22	1	9	0.022962
	mec-4	5	22	1	10	1
	mec-4	5	23	1	1	0.00467811
	mec-4	5	23	1	2	0.999996
	mec-4	5	23	1	3	0.949536
	mec-4	5	23	1	4	0.936142
	mec-4	5	23	1	5	0.999999
	mec-4	5	24	1	1	0.073016
	mec-4	5	24	1	2	0.999992
	mec-4	5	24	1	3	0.00792913
	mec-4	5	24	1	4	0.999647
	mec-4	5	24	1	5	0.0107367
	mec-4	5	24	1	6	0.0386882
	mec-4	5	24	1	7	0.999994
	mec-4	5	25	1	1	0.999979
	mec-4	5	25	1	2	0.996737
	mec-4	5	25	1	3	0.999289
	mec-4	5	25	1	4	0.999993
	mec-4	5	26	1	1	0.00454823
	mec-4	5	26	1	2	0.398719
	mec-4	5	26	1	3	0.00490286
	mec-4	5	26	1	4	0.00483013
	mec-4	5	26	1	5	0.0253052
	mec-4	5	26	1	6	0.00138104
	mec-4	5	26	1	7	0.00103207
	mec-4	5	26	1	8	0.99973
	mec-4	5	26	1	9	0.999999
	mec-4	5	27	1	1	0.000621423
	mec-4	5	27	1	2	1
	mec-4	5	27	1	3	0.999965
	mec-4	5	28	1	1	0.305136
	mec-4	5	28	1	2	1
	osm-6	5	30	1	1	1
	osm-6	5	31	1	1	1
	osm-6	5	32	1	1	0.0052903
	osm-6	5	32	1	2	1
	osm-6	5	33	1	1	1
	osm-6	5	34	1	1	1
	osm-6	5	35	1	1	0.999989
	osm-6	5	35	1	2	1
	osm-6	5	36	1	1	0.999999
	osm-6	5	37	1	1	1
	osm-6	5	38	1	1	1
	osm-6	5	39	1	1	1
	osm-6	5	40	1	1	0.999966
	osm-6	5	40	1	2	0.323416
	osm-6	5	40	1	3	0.999999
	osm-6	5	40	1	4	0.00106261
	osm-6	5	40	1	5	0.996329
	osm-6	5	41	1	1	1
	osm-6	5	41	1	2	0.999945
	osm-6	5	42	1	1	0.999999
	osm-6	5	42	1	2	0.99974
	osm-6	5	43	1	1	1
	osm-6	5	45	1	1	0.857599
	osm-6	5	45	1	2	0.817807
	osm-6	5	45	1	3	0.999992
	osm-6	5	45	1	4	0.014167
	osm-6	5	45	1	5	0.999919
	osm-6	5	46	1	1	0.999983
	osm-6	5	46	1	2	0.00273291
	osm-6	5	47	1	1	1
	osm-6	5	48	1	1	1
	osm-6	5	49	1	1	0.999999
	osm-6	5	50	1	1	0.999997
	osm-6	5	50	1	2	0.999999
	osm-6	5	51	1	1	0.999989
	osm-6	5	51	1	2	0.99999
	osm-6	5	52	1	1	1
	osm-6	5	53	1	1	1
	osm-6	5	54	1	1	0.00838437
	osm-6	5	54	1	2	0.99998
	osm-6	5	54	1	3	1
	osm-6	5	55	1	1	0.999996
	osm-6	5	55	1	2	0.957493
	well-fed	5	56	1	1	0.993166
	well-fed	5	56	1	2	1
	well-fed	5	57	1	1	3.27353e-05
	well-fed	5	57	1	2	3.02621e-05
	well-fed	5	57	1	3	1
	well-fed	5	58	1	1	7.0721e-05
	well-fed	5	58	1	2	0.0088564
	well-fed	5	58	1	3	0.998778
	well-fed	5	58	1	4	0.999979
	well-fed	5	59	1	1	7.71461e-06
	well-fed	5	59	1	2	0.999985
	well-fed	5	60	1	1	0.542014
	well-fed	5	60	1	2	0.999557
	well-fed	5	60	1	3	1
	well-fed	5	61	1	1	0.0191122
	well-fed	5	61	1	2	0.985801
	well-fed	5	61	1	3	0.0145072
	well-fed	5	61	1	4	0.999992
	well-fed	5	62	1	1	0.114637
	well-fed	5	62	1	2	0.0012234
	well-fed	5	62	1	3	0.000205132
	well-fed	5	62	1	4	1
	well-fed	5	63	1	1	0.999926
	well-fed	5	63	1	2	0.999983
	well-fed	5	64	1	1	0.999998
	well-fed	5	64	1	2	0.00150959
	well-fed	5	64	1	3	0.999991
	well-fed	5	65	1	1	0.980402
	well-fed	5	65	1	2	3.57641e-05
	well-fed	5	65	1	3	1
	well-fed	5	65	1	4	0.944036
	well-fed	5	66	1	1	0.517238
	well-fed	5	66	1	2	0.999998
	well-fed	5	66	1	3	0.990681
	well-fed	5	66	1	4	0.000340437
	well-fed	5	66	1	5	0.998261
	well-fed	5	66	1	6	0.243527
	well-fed	5	67	1	1	0.999997
	well-fed	5	68	1	1	1
	well-fed	5	69	1	1	0.000156735
	well-fed	5	69	1	2	0.99957
	well-fed	5	70	1	1	1
	well-fed	5	71	1	1	1
	well-fed	5	71	1	2	0.999899
	well-fed	5	71	1	3	0.969724
	well-fed	5	72	1	1	1
	well-fed	5	72	1	2	0.000455467
	well-fed	5	73	1	1	0.320794
	well-fed	5	73	1	2	0.984671
	well-fed	5	73	1	3	0.00657047
	well-fed	5	73	1	4	0.00527421
	well-fed	5	73	1	5	0.999998
	well-fed	5	73	1	6	0.999987
	well-fed	5	74	1	1	0.99997
	well-fed	5	74	1	2	0.0110225
	well-fed	5	74	1	3	0.99993
	well-fed	5	74	1	4	0.00135378
	well-fed	5	74	1	5	0.048383
	well-fed	5	74	1	6	0.0230055
	well-fed	5	74	1	7	0.992257
	well-fed	5	74	1	8	0.999806
	well-fed	5	75	1	1	0.999962
	well-fed	5	75	1	2	0.99992
	well-fed	5	75	1	3	0.999999
	well-fed	5	76	1	1	0.999842
	well-fed	5	76	1	2	1
	well-fed	5	76	1	3	0.966384
	well-fed	5	77	1	1	9.61815e-07
	well-fed	5	77	1	2	0.0471234
	well-fed	5	77	1	3	0.999846
	well-fed	5	77	1	4	0.0322047
	well-fed	5	77	1	5	1
	well-fed	5	78	1	1	0.0310672
	well-fed	5	78	1	2	0.172186
	well-fed	5	78	1	3	0.000947821
	well-fed	5	78	1	4	0.000266495
	well-fed	5	78	1	5	0.000151794
	well-fed	5	78	1	6	0.00030672
	well-fed	5	78	1	7	0.999959
	well-fed	5	78	1	8	0.00269949
	well-fed	5	78	1	9	0.99999
	well-fed	5	79	1	1	0.0317489
	well-fed	5	79	1	2	0.999999
	well-fed	5	79	1	3	0.997351
	well-fed	5	79	1	4	0.999999
	well-fed	5	80	1	1	6.61252e-06
	well-fed	5	80	1	2	0.00286173
	well-fed	5	80	1	3	0.00255054
	well-fed	5	80	1	4	0.999917
	well-fed	5	80	1	5	0.425811
	well-fed	5	80	1	6	0.00164103
	well-fed	5	80	1	7	0.00395194
	well-fed	5	80	1	8	0.999999
	well-fed	5	81	1	1	1
	well-fed	5	82	1	1	0.0158726
	well-fed	5	82	1	2	0.00285962
	well-fed	5	82	1	3	0.298223
	well-fed	5	82	1	4	1
	well-fed	5	83	1	1	0.00773837
	well-fed	5	83	1	2	0.99995
	well-fed	5	83	1	3	0.999359
	well-fed	5	83	1	4	0.999989
	mec-4	1	84	1	1	0.00013092
	mec-4	1	84	1	2	0.999884
	mec-4	1	84	1	3	3.84072e-05
	mec-4	1	84	1	4	0.0536077
	mec-4	1	84	1	5	0.140094
	mec-4	1	84	1	6	0.999965
	mec-4	1	85	1	1	7.41032e-05
	mec-4	1	85	1	2	0.50582
	mec-4	1	85	1	3	0.926405
	mec-4	1	85	1	4	0.00139276
	mec-4	1	85	1	5	0.963394
	mec-4	1	85	1	6	0.976498
	mec-4	1	85	1	7	0.0103924
	mec-4	1	85	1	8	0.0434347
	mec-4	1	85	1	9	0.00606159
	mec-4	1	86	1	1	0.217125
	mec-4	1	86	1	2	0.0891293
	mec-4	1	86	1	3	0.0234139
	mec-4	1	86	1	4	0.995709
	mec-4	1	86	1	5	0.0327851
	mec-4	1	86	1	6	0.010237
	mec-4	1	86	1	7	0.999875
	mec-4	1	86	1	8	0.000156602
	mec-4	1	86	1	9	0.0220348
	mec-4	1	87	1	1	0.979037
	mec-4	1	87	1	2	0.0523722
	mec-4	1	87	1	3	0.000360072
	mec-4	1	87	1	4	0.0320598
	mec-4	1	87	1	5	0.997235
	mec-4	1	87	1	6	0.000176292
	mec-4	1	87	1	7	0.00103541
	mec-4	1	87	1	8	0.000104573
	mec-4	1	87	1	9	0.0050293
	mec-4	1	87	1	10	5.29431e-06
	mec-4	1	88	1	1	1.25752e-05
	mec-4	1	88	1	2	0.108486
	mec-4	1	88	1	3	8.68103e-05
	mec-4	1	88	1	4	0.0229731
	mec-4	1	88	1	5	0.00601447
	mec-4	1	89	1	1	0.000879176
	mec-4	1	89	1	2	9.37755e-05
	mec-4	1	89	1	3	0.038493
	mec-4	1	89	1	4	0.00117431
	mec-4	1	89	1	5	0.00102193
	mec-4	1	89	1	6	0.00723613
	mec-4	1	89	1	7	5.77254e-06
	mec-4	1	89	1	8	0.000290586
	mec-4	1	89	1	9	0.151878
	mec-4	1	89	1	10	0.996188
	mec-4	1	90	1	1	0.000200358
	mec-4	1	90	1	2	8.63708e-05
	mec-4	1	90	1	3	0.0220159
	mec-4	1	90	1	4	0.00141447
	mec-4	1	90	1	5	0.00129939
	mec-4	1	90	1	6	0.00232159
	mec-4	1	91	1	1	5.5501e-05
	mec-4	1	91	1	2	9.5905e-05
	mec-4	1	91	1	3	0.0135606
	mec-4	1	91	1	4	0.00237497
	mec-4	1	91	1	5	0.869687
	mec-4	1	91	1	6	0.000170267
	mec-4	1	91	1	7	9.13457e-06
	mec-4	1	91	1	8	0.354221
	mec-4	1	91	1	9	0.964008
	mec-4	1	91	1	10	0.860661
	mec-4	1	91	1	11	0.667039
	mec-4	1	92	1	1	0.000267459
	mec-4	1	92	1	2	4.25197e-05
	mec-4	1	92	1	3	0.0627342
	mec-4	1	92	1	4	0.993978
	mec-4	1	92	1	5	0.0823925
	mec-4	1	92	1	6	0.997663
	mec-4	1	93	1	1	0.0111506
	mec-4	1	93	1	2	0.179199
	mec-4	1	93	1	3	0.0120947
	mec-4	1	93	1	4	0.0317083
	mec-4	1	93	1	5	1.36822e-05
	mec-4	1	93	1	6	4.52588e-06
	mec-4	1	93	1	7	0.00546056
	mec-4	1	93	1	8	0.0136382
	mec-4	1	93	1	9	0.120916
	mec-4	1	93	1	10	0.95471
	mec-4	1	93	1	11	0.0482699
	mec-4	1	93	1	12	0.0013595
	mec-4	1	93	1	13	0.0368454
	mec-4	1	93	1	14	0.87419
	mec-4	1	94	1	1	0.00163652
	mec-4	1	94	1	2	0.086725
	mec-4	1	94	1	3	0.0104037
	mec-4	1	94	1	4	0.00222542
	mec-4	1	94	1	5	0.021223
	mec-4	1	94	1	6	0.999565
	mec-4	1	94	1	7	7.24597e-05
	mec-4	1	94	1	8	0.00195592
	mec-4	1	94	1	9	0.169406
	mec-4	1	95	1	1	9.14899e-06
	mec-4	1	95	1	2	0.999942
	mec-4	1	95	1	3	0.991826
	mec-4	1	96	1	1	0.000227313
	mec-4	1	96	1	2	0.0101909
	mec-4	1	96	1	3	0.99317
	mec-4	1	96	1	4	0.000163494
	mec-4	1	96	1	5	0.000856888
	mec-4	1	96	1	6	0.989768
	mec-4	1	97	1	1	0.999363
	mec-4	1	97	1	2	0.938811
	mec-4	1	97	1	3	0.991552
	mec-4	1	98	1	1	0.000916969
	mec-4	1	98	1	2	0.0025298
	mec-4	1	98	1	3	0.999719
	mec-4	1	98	1	4	6.03623e-05
	mec-4	1	98	1	5	0.996664
	mec-4	1	99	1	1	2.52522e-06
	mec-4	1	99	1	2	0.00167313
	mec-4	1	99	1	3	0.999891
	mec-4	1	99	1	4	0.999915
	osm-6	1	100	1	1	0.00676628
	osm-6	1	100	1	2	0.345542
	osm-6	1	100	1	3	0.999109
	osm-6	1	100	1	4	0.999994
	osm-6	1	101	1	1	0.00677897
	osm-6	1	101	1	2	0.999547
	osm-6	1	101	1	3	0.979349
	osm-6	1	102	1	1	0.966923
	osm-6	1	102	1	2	0.129472
	osm-6	1	102	1	3	0.00931479
	osm-6	1	102	1	4	0.00882477
	osm-6	1	102	1	5	0.998327
	osm-6	1	102	1	6	0.99504
	osm-6	1	102	1	7	0.820567
	osm-6	1	102	1	8	0.995119
	osm-6	1	103	1	1	0.999459
	osm-6	1	104	1	1	9.05282e-05
	osm-6	1	104	1	2	0.999999
	osm-6	1	105	1	1	0.999793
	osm-6	1	105	1	2	0.999589
	osm-6	1	105	1	3	0.770571
	osm-6	1	106	1	1	0.00495864
	osm-6	1	106	1	2	0.999986
	osm-6	1	106	1	3	0.0277636
	osm-6	1	107	1	1	0.222057
	osm-6	1	107	1	2	0.125728
	osm-6	1	107	1	3	0.571823
	osm-6	1	107	1	4	0.999661
	osm-6	1	108	1	1	0.999908
	osm-6	1	108	1	2	0.999545
	osm-6	1	108	1	3	0.00618426
	osm-6	1	109	1	1	0.999999
	osm-6	1	109	1	2	0.988873
	osm-6	1	110	1	1	0.999999
	osm-6	1	110	1	2	0.98041
	osm-6	1	110	1	3	0.000705102
	osm-6	1	111	1	1	0.999272
	osm-6	1	111	1	2	0.992823
	osm-6	1	111	1	3	0.259171
	osm-6	1	111	1	4	0.999983
	osm-6	1	113	1	1	0.840543
	osm-6	1	113	1	2	0.984056
	well-fed	1	114	1	1	0.0253957
	well-fed	1	114	1	2	0.21305
	well-fed	1	114	1	3	0.999748
	well-fed	1	114	1	4	0.999487
	well-fed	1	114	1	5	7.87439e-05
	well-fed	1	115	1	1	0.00463396
	well-fed	1	115	1	2	0.00342426
	well-fed	1	115	1	3	0.0403203
	well-fed	1	115	1	4	0.999989
	well-fed	1	116	1	1	0.101382
	well-fed	1	116	1	2	0.471591
	well-fed	1	116	1	3	2.23269e-05
	well-fed	1	116	1	4	8.85826e-05
	well-fed	1	116	1	5	4.99855e-07
	well-fed	1	116	1	6	2.43252e-06
	well-fed	1	116	1	7	0.0107115
	well-fed	1	116	1	8	0.0315699
	well-fed	1	117	1	1	0.000132229
	well-fed	1	117	1	2	0.321536
	well-fed	1	117	1	3	6.55943e-05
	well-fed	1	117	1	4	0.150108
	well-fed	1	117	1	5	2.16211e-05
	well-fed	1	117	1	6	5.45453e-05
	well-fed	1	117	1	7	0.99738
	well-fed	1	118	1	1	0.106454
	well-fed	1	118	1	2	0.00594957
	well-fed	1	118	1	3	0.99906
	well-fed	1	118	1	4	0.000537455
	well-fed	1	119	1	1	0.00134215
	well-fed	1	119	1	2	8.06791e-05
	well-fed	1	119	1	3	0.00541135
	well-fed	1	119	1	4	0.000245948
	well-fed	1	119	1	5	0.018775
	well-fed	1	119	1	6	0.976503
	well-fed	1	119	1	7	0.0339948
	well-fed	1	120	1	1	2.37855e-05
	well-fed	1	120	1	2	0.999927
	well-fed	1	120	1	3	0.37384
	well-fed	1	120	1	4	0.999953
	well-fed	1	121	1	1	0.00706774
	well-fed	1	121	1	2	0.0548863
	well-fed	1	121	1	3	9.31184e-05
	well-fed	1	121	1	4	0.0334692
	well-fed	1	121	1	5	0.0196295
	well-fed	1	121	1	6	0.00747697
	well-fed	1	122	1	1	0.000496571
	well-fed	1	122	1	2	0.00125091
	well-fed	1	122	1	3	0.00157361
	well-fed	1	122	1	4	0.189027
	well-fed	1	122	1	5	0.070828
	well-fed	1	122	1	6	0.00423199
	well-fed	1	122	1	7	0.999996
	well-fed	1	123	1	1	3.4229e-06
	well-fed	1	123	1	2	0.00166356
	well-fed	1	123	1	3	0.021743
	well-fed	1	123	1	4	0.00119694
	well-fed	1	123	1	5	0.00867362
	well-fed	1	123	1	6	0.000187692
	well-fed	1	123	1	7	0.0231145
	well-fed	1	123	1	8	0.0197254
	well-fed	1	123	1	9	0.387941
	well-fed	1	124	1	1	6.27088e-05
	well-fed	1	124	1	2	0.999978
	well-fed	1	124	1	3	0.983834
	well-fed	1	124	1	4	0.000332498
	well-fed	1	124	1	5	0.00239914
	well-fed	1	124	1	6	0.00385079
	well-fed	1	124	1	7	0.000308985
	well-fed	1	125	1	1	0.00526827
	well-fed	1	125	1	2	0.000179029
	well-fed	1	125	1	3	0.988563
	well-fed	1	125	1	4	7.26666e-05
	well-fed	1	125	1	5	0.0402688
	well-fed	1	125	1	6	0.00520682
	well-fed	1	125	1	7	0.00441635
	well-fed	1	125	1	8	0.000362571
	well-fed	1	125	1	9	0.99402
	well-fed	1	126	1	1	6.73748e-05
	well-fed	1	126	1	2	0.000397624
	well-fed	1	126	1	3	0.999816
	well-fed	1	126	1	4	0.0144022
	well-fed	1	126	1	5	0.01839
	well-fed	1	126	1	6	0.0299836
	well-fed	1	126	1	7	0.887433
	well-fed	1	126	1	8	0.00594911
	well-fed	1	127	1	1	0.0288817
	well-fed	1	127	1	2	0.987484
	well-fed	1	127	1	3	0.0163582
	mec-4	10	128	1	1	0.000170251
	mec-4	10	128	1	2	0.000840946
	mec-4	10	128	1	3	0.999947
	mec-4	10	128	1	4	0.0146543
	mec-4	10	128	1	5	0.999985
	mec-4	10	128	1	6	0.999861
	mec-4	10	129	1	1	0.000766428
	mec-4	10	129	1	2	1.03038e-05
	mec-4	10	129	1	3	0.00018344
	mec-4	10	129	1	4	0.991843
	mec-4	10	129	1	5	0.99491
	mec-4	10	129	1	6	0.217078
	mec-4	10	129	1	7	0.00659059
	mec-4	10	129	1	8	0.0183931
	mec-4	10	129	1	9	0.998726
	mec-4	10	129	1	10	0.999985
	mec-4	10	130	1	1	0.000756508
	mec-4	10	130	1	2	0.241474
	mec-4	10	130	1	3	0.264445
	mec-4	10	130	1	4	1
	mec-4	10	131	1	1	0.0062979
	mec-4	10	131	1	2	0.999989
	mec-4	10	131	1	3	0.000180938
	mec-4	10	131	1	4	0.030396
	mec-4	10	131	1	5	0.999998
	mec-4	10	131	1	6	0.000519421
	mec-4	10	131	1	7	0.999506
	mec-4	10	132	1	1	0.999992
	mec-4	10	132	1	2	1
	mec-4	10	133	1	1	0.999965
	mec-4	10	133	1	2	0.0086801
	mec-4	10	133	1	3	0.000515058
	mec-4	10	133	1	4	0.00394023
	mec-4	10	133	1	5	0.999937
	mec-4	10	133	1	6	0.000511085
	mec-4	10	133	1	7	0.905127
	mec-4	10	134	1	1	0.99999
	mec-4	10	134	1	2	0.00129623
	mec-4	10	134	1	3	0.999674
	mec-4	10	134	1	4	0.999981
	mec-4	10	135	1	1	1
	mec-4	10	135	1	2	0.99959
	mec-4	10	135	1	3	0.999469
	mec-4	10	135	1	4	0.844445
	mec-4	10	136	1	1	0.0877656
	mec-4	10	136	1	2	0.999737
	mec-4	10	136	1	3	0.999992
	mec-4	10	137	1	1	0.000640121
	mec-4	10	137	1	2	0.998882
	mec-4	10	137	1	3	0.0110716
	mec-4	10	137	1	4	0.0162364
	mec-4	10	137	1	5	0.999982
	mec-4	10	138	1	1	1.35628e-05
	mec-4	10	138	1	2	0.00423944
	mec-4	10	138	1	3	1
	mec-4	10	139	1	1	6.80621e-05
	mec-4	10	139	1	2	0.000295315
	mec-4	10	139	1	3	0.999999
	mec-4	10	140	1	1	0.501135
	mec-4	10	140	1	2	0.0200575
	mec-4	10	140	1	3	0.00128557
	mec-4	10	140	1	4	0.00156844
	mec-4	10	140	1	5	0.000442559
	mec-4	10	140	1	6	0.000770084
	mec-4	10	140	1	7	0.999978
	mec-4	10	141	1	1	0.999986
	mec-4	10	141	1	2	0.999998
	mec-4	10	142	1	1	0.0173193
	mec-4	10	142	1	2	0.999662
	mec-4	10	142	1	3	0.999996
	mec-4	10	143	1	1	0.0964128
	mec-4	10	143	1	2	0.999876
	mec-4	10	143	1	3	1
	osm-6	10	144	1	1	0.999999
	osm-6	10	144	1	2	0.999929
	osm-6	10	144	1	3	0.999908
	osm-6	10	145	1	1	0.999997
	osm-6	10	146	1	1	0.999836
	osm-6	10	146	1	2	0.999996
	osm-6	10	147	1	1	0.999978
	osm-6	10	149	1	1	1
	osm-6	10	150	1	1	1
	osm-6	10	151	1	1	0.000206893
	osm-6	10	152	1	1	0.999998
	osm-6	10	152	1	2	0.999998
	osm-6	10	152	1	3	0.603623
	osm-6	10	153	1	1	0.999004
	osm-6	10	155	1	1	1
	osm-6	10	155	1	2	0.999978
	osm-6	10	156	1	1	1
	osm-6	10	157	1	1	0.000607062
	osm-6	10	157	1	2	1
	osm-6	10	158	1	1	0.999993
	osm-6	10	158	1	2	0.00697273
	osm-6	10	158	1	3	0.999399
	osm-6	10	158	1	4	0.996879
	osm-6	10	158	1	5	0.225507
	well-fed	10	159	1	1	0.000295158
	well-fed	10	159	1	2	0.0129928
	well-fed	10	159	1	3	0.99137
	well-fed	10	159	1	4	1
	well-fed	10	160	1	1	0.00371413
	well-fed	10	160	1	2	0.000302095
	well-fed	10	160	1	3	0.0752185
	well-fed	10	160	1	4	0.000143004
	well-fed	10	160	1	5	1.0327e-05
	well-fed	10	160	1	6	0.000933383
	well-fed	10	160	1	7	0.00021238
	well-fed	10	160	1	8	1
	well-fed	10	161	1	1	0.877242
	well-fed	10	161	1	2	2.55138e-05
	well-fed	10	161	1	3	3.74489e-05
	well-fed	10	161	1	4	0.978726
	well-fed	10	161	1	5	0.977827
	well-fed	10	161	1	6	0.0372607
	well-fed	10	161	1	7	0.000479222
	well-fed	10	161	1	8	0.000471026
	well-fed	10	161	1	9	3.67667e-06
	well-fed	10	161	1	10	0.0112839
	well-fed	10	161	1	11	0.000105456
	well-fed	10	161	1	12	0.999986
	well-fed	10	162	1	1	0.000235634
	well-fed	10	162	1	2	0.000130841
	well-fed	10	162	1	3	0.000446023
	well-fed	10	162	1	4	1
	well-fed	10	163	1	1	0.0133853
	well-fed	10	163	1	2	0.00122603
	well-fed	10	163	1	3	0.999952
	well-fed	10	163	1	4	1
	well-fed	10	164	1	1	0.998887
	well-fed	10	164	1	2	0.999996
	well-fed	10	164	1	3	0.999992
	well-fed	10	165	1	1	0.00464723
	well-fed	10	165	1	2	2.07612e-05
	well-fed	10	165	1	3	0.00853865
	well-fed	10	165	1	4	2.61881e-05
	well-fed	10	165	1	5	0.999957
	well-fed	10	165	1	6	0.999973
	well-fed	10	166	1	1	0.000622098
	well-fed	10	166	1	2	0.000206954
	well-fed	10	166	1	3	1
	well-fed	10	167	1	1	0.00476595
	well-fed	10	167	1	2	0.00237998
	well-fed	10	167	1	3	0.999999
	well-fed	10	168	1	1	0.0129527
	well-fed	10	168	1	2	0.00300162
	well-fed	10	168	1	3	0.999956
	well-fed	10	168	1	4	0.56515
	well-fed	10	168	1	5	0.999986
	well-fed	10	168	1	6	0.00160346
	well-fed	10	168	1	7	0.994387
	well-fed	10	169	1	1	0.000279024
	well-fed	10	169	1	2	0.999999
	well-fed	10	169	1	3	0.999217
	well-fed	10	169	1	4	0.000526383
	well-fed	10	170	1	1	0.0665472
	well-fed	10	170	1	2	1
	well-fed	10	171	1	1	0.999986
	well-fed	10	171	1	2	0.000152888
	well-fed	10	171	1	3	0.999956
	well-fed	10	171	1	4	0.999783
	well-fed	10	172	1	1	1
	well-fed	10	173	1	1	0.000608899
	well-fed	10	173	1	2	6.49391e-05
	well-fed	10	173	1	3	0.000151966
	well-fed	10	173	1	4	0.190322
	well-fed	10	173	1	5	0.0110382
	well-fed	10	173	1	6	0.999547
	well-fed	10	173	1	7	0.999994
	well-fed	10	173	1	8	0.999803
	well-fed	10	174	1	1	9.9654e-05
	well-fed	10	174	1	2	0.719523
	well-fed	10	174	1	3	0.00433648
	well-fed	10	174	1	4	0.179049
	well-fed	10	174	1	5	1
	mec-4	5	175	1	1	0.99733
	mec-4	5	175	1	2	0.999822
	mec-4	5	175	1	3	0.000773438
	mec-4	5	175	1	4	0.00236856
	mec-4	5	175	1	5	0.00013453
	mec-4	5	175	1	6	0.125606
	mec-4	5	175	1	7	0.999986
	mec-4	5	176	1	1	1
	mec-4	5	177	1	1	0.147871
	mec-4	5	177	1	2	0.99985
	mec-4	5	177	1	3	0.999996
	mec-4	5	177	1	4	0.159779
	mec-4	5	177	1	5	0.0339101
	mec-4	5	177	1	6	0.00240931
	mec-4	5	177	1	7	0.969829
	mec-4	5	178	1	1	0.00418453
	mec-4	5	178	1	2	0.00367457
	mec-4	5	178	1	3	0.999996
	mec-4	5	178	1	4	0.179307
	mec-4	5	178	1	5	0.99977
	mec-4	5	179	1	1	0.000867408
	mec-4	5	179	1	2	0.00612647
	mec-4	5	179	1	3	0.997459
	mec-4	5	179	1	4	0.00062201
	mec-4	5	179	1	5	1
	mec-4	5	180	1	1	0.00249162
	mec-4	5	180	1	2	0.0109826
	mec-4	5	180	1	3	0.260337
	mec-4	5	180	1	4	0.0069327
	mec-4	5	180	1	5	0.000375995
	mec-4	5	180	1	6	0.000254092
	mec-4	5	180	1	7	0.00100666
	mec-4	5	180	1	8	0.00259278
	mec-4	5	180	1	9	1
	mec-4	5	181	1	1	2.17713e-05
	mec-4	5	181	1	2	0.0339502
	mec-4	5	181	1	3	1
	mec-4	5	182	1	1	8.5761e-05
	mec-4	5	182	1	2	0.00113982
	mec-4	5	182	1	3	0.00410287
	mec-4	5	182	1	4	0.000604732
	mec-4	5	182	1	5	0.00074581
	mec-4	5	182	1	6	0.000317219
	mec-4	5	182	1	7	1
	mec-4	5	183	1	1	0.00237189
	mec-4	5	183	1	2	0.0053897
	mec-4	5	183	1	3	0.0083775
	mec-4	5	183	1	4	0.0190439
	mec-4	5	183	1	5	0.999962
	mec-4	5	183	1	6	0.000124156
	mec-4	5	183	1	7	0.999977
	mec-4	5	184	1	1	0.0887136
	mec-4	5	184	1	2	0.999992
	mec-4	5	184	1	3	0.999974
	mec-4	5	185	1	1	0.0125984
	mec-4	5	185	1	2	0.994506
	mec-4	5	185	1	3	0.999591
	mec-4	5	185	1	4	0.999999
	mec-4	5	186	1	1	0.00291418
	mec-4	5	186	1	2	1
	mec-4	5	187	1	1	3.66064e-05
	mec-4	5	187	1	2	0.998627
	mec-4	5	187	1	3	0.000791083
	mec-4	5	187	1	4	0.0388782
	mec-4	5	187	1	5	0.999956
	mec-4	5	187	1	6	0.999791
	mec-4	5	187	1	7	0.994438
	mec-4	5	188	1	1	0.000111133
	mec-4	5	188	1	2	0.114853
	mec-4	5	188	1	3	0.000895665
	mec-4	5	188	1	4	0.999932
	mec-4	5	188	1	5	0.00307079
	mec-4	5	189	1	1	0.987937
	mec-4	5	189	1	2	0.00349801
	mec-4	5	189	1	3	0.999999
	mec-4	5	189	1	4	0.0163153
	mec-4	5	189	1	5	0.98069
	mec-4	5	190	1	1	0.530154
	mec-4	5	190	1	2	0.00022532
	mec-4	5	190	1	3	0.000592599
	mec-4	5	190	1	4	1
	osm-6	5	191	1	1	0.999948
	osm-6	5	191	1	2	0.99982
	osm-6	5	191	1	3	0.999992
	osm-6	5	191	1	4	0.46505
	osm-6	5	192	1	1	0.999999
	osm-6	5	193	1	1	0.993312
	osm-6	5	193	1	2	1
	osm-6	5	194	1	1	1
	osm-6	5	195	1	1	1
	osm-6	5	195	1	2	0.999998
	osm-6	5	196	1	1	0.988583
	osm-6	5	196	1	2	0.203955
	osm-6	5	196	1	3	0.994936
	osm-6	5	196	1	4	0.999987
	osm-6	5	197	1	1	0.307742
	osm-6	5	197	1	2	0.999999
	osm-6	5	198	1	1	1
	osm-6	5	200	1	1	0.999999
	osm-6	5	201	1	1	1
	osm-6	5	202	1	1	1
	osm-6	5	203	1	1	1
	osm-6	5	205	1	1	0.0413387
	osm-6	5	205	1	2	0.0556316
	well-fed	5	206	1	1	0.0535292
	well-fed	5	206	1	2	0.998584
	well-fed	5	206	1	3	0.935161
	well-fed	5	206	1	4	0.997822
	well-fed	5	206	1	5	1
	well-fed	5	207	1	1	0.000680939
	well-fed	5	207	1	2	0.999821
	well-fed	5	207	1	3	0.999896
	well-fed	5	207	1	4	0.00166206
	well-fed	5	207	1	5	0.182532
	well-fed	5	207	1	6	0.998972
	well-fed	5	208	1	1	0.312792
	well-fed	5	208	1	2	1
	well-fed	5	209	1	1	0.00325794
	well-fed	5	209	1	2	0.999981
	well-fed	5	209	1	3	0.00168645
	well-fed	5	209	1	4	0.999843
	well-fed	5	209	1	5	0.000501221
	well-fed	5	209	1	6	0.000230786
	well-fed	5	209	1	7	0.982936
	well-fed	5	209	1	8	0.999382
	well-fed	5	210	1	1	0.00226293
	well-fed	5	210	1	2	0.928345
	well-fed	5	210	1	3	0.999773
	well-fed	5	210	1	4	0.000533928
	well-fed	5	210	1	5	0.00406057
	well-fed	5	210	1	6	0.999079
	well-fed	5	211	1	1	3.49508e-06
	well-fed	5	211	1	2	0.0255049
	well-fed	5	211	1	3	0.000102627
	well-fed	5	211	1	4	0.0177459
	well-fed	5	211	1	5	0.000197392
	well-fed	5	211	1	6	0.999306
	well-fed	5	211	1	7	9.20778e-06
	well-fed	5	212	1	1	0.997853
	well-fed	5	212	1	2	0.999585
	well-fed	5	212	1	3	0.405282
	well-fed	5	212	1	4	0.99999
	well-fed	5	213	1	1	0.996665
	well-fed	5	213	1	2	0.00373686
	well-fed	5	213	1	3	0.00525138
	well-fed	5	213	1	4	0.00537597
	well-fed	5	213	1	5	0.995916
	well-fed	5	213	1	6	0.99976
	well-fed	5	213	1	7	0.000151382
	well-fed	5	213	1	8	0.015441
	well-fed	5	213	1	9	0.0183206
	well-fed	5	213	1	10	0.999252
	well-fed	5	214	1	1	0.0164115
	well-fed	5	214	1	2	0.00118627
	well-fed	5	214	1	3	0.999992
	well-fed	5	214	1	4	0.999975
	well-fed	5	215	1	1	0.000289168
	well-fed	5	215	1	2	0.999767
	well-fed	5	215	1	3	0.999974
	well-fed	5	216	1	1	0.999996
	well-fed	5	216	1	2	0.999999
	well-fed	5	217	1	1	0.00253448
	well-fed	5	217	1	2	0.999997
	well-fed	5	218	1	1	0.00102048
	well-fed	5	218	1	2	0.999991
	well-fed	5	218	1	3	0.0306844
	well-fed	5	220	1	1	0.00307107
	well-fed	5	220	1	2	0.000430639
	well-fed	5	220	1	3	0.000608628
	well-fed	5	220	1	4	0.901891
	well-fed	5	220	1	5	1
	well-fed	5	221	1	1	0.012938
	well-fed	5	221	1	2	0.273707
	well-fed	5	221	1	3	0.999239
	well-fed	5	221	1	4	0.0110059
	well-fed	5	221	1	5	0.999969
	well-fed	5	221	1	6	0.999677
	mec-4	5	1	2	1	0.999973
	mec-4	5	1	2	2	0.999999
	mec-4	5	1	2	3	0.0547538
	mec-4	5	1	2	4	0.00191844
	mec-4	5	1	2	5	0.999904
	mec-4	5	2	2	1	1
	mec-4	5	2	2	2	0.00558375
	mec-4	5	3	2	1	0.245398
	mec-4	5	3	2	2	0.165659
	mec-4	5	3	2	3	7.62142e-06
	mec-4	5	3	2	4	0.999528
	mec-4	5	3	2	5	0.0329165
	mec-4	5	3	2	6	1
	mec-4	5	3	2	7	0.00110545
	mec-4	5	3	2	8	0.98376
	mec-4	5	4	2	1	0.000317075
	mec-4	5	4	2	2	0.999714
	mec-4	5	4	2	3	1
	mec-4	5	5	2	1	0.243805
	mec-4	5	5	2	2	1
	mec-4	5	5	2	3	2.4734e-05
	mec-4	5	5	2	4	0.999268
	mec-4	5	5	2	5	0.0031716
	mec-4	5	5	2	6	0.997452
	mec-4	5	6	2	1	0.00229417
	mec-4	5	6	2	2	0.00446944
	mec-4	5	6	2	3	0.998505
	mec-4	5	6	2	4	0.00117288
	mec-4	5	6	2	5	0.999943
	mec-4	5	6	2	6	0.00144965
	mec-4	5	6	2	7	0.00012799
	mec-4	5	6	2	8	0.959732
	mec-4	5	7	2	1	0.999996
	mec-4	5	7	2	2	0.0360132
	mec-4	5	7	2	3	9.88262e-05
	mec-4	5	7	2	4	0.00232479
	mec-4	5	7	2	5	0.993254
	mec-4	5	7	2	6	0.000225491
	mec-4	5	7	2	7	0.0010996
	mec-4	5	8	2	1	4.42988e-06
	mec-4	5	8	2	2	0.00025007
	mec-4	5	8	2	3	0.000140375
	mec-4	5	8	2	4	1
	mec-4	5	9	2	1	0.0370058
	mec-4	5	9	2	2	0.000734296
	mec-4	5	9	2	3	0.999999
	mec-4	5	9	2	4	0.999769
	mec-4	5	9	2	5	0.999714
	mec-4	5	10	2	1	0.999999
	mec-4	5	10	2	2	0.734187
	mec-4	5	10	2	3	0.999996
	mec-4	5	11	2	1	1
	mec-4	5	12	2	1	1
	mec-4	5	13	2	1	1.593e-05
	mec-4	5	13	2	2	0.996206
	mec-4	5	13	2	3	0.000137059
	mec-4	5	13	2	4	0.295582
	mec-4	5	13	2	5	0.518747
	mec-4	5	13	2	6	0.0119024
	mec-4	5	13	2	7	1
	mec-4	5	13	2	8	0.0153006
	mec-4	5	14	2	1	0.0414836
	mec-4	5	14	2	2	0.23292
	mec-4	5	14	2	3	0.999606
	mec-4	5	14	2	4	1
	mec-4	5	15	2	1	0.999999
	mec-4	5	15	2	2	0.649637
	mec-4	5	15	2	3	0.000377147
	mec-4	5	15	2	4	0.0862519
	mec-4	5	15	2	5	0.99969
	mec-4	5	16	2	1	0.0919316
	mec-4	5	16	2	2	1
	mec-4	5	16	2	3	0.999959
	mec-4	5	17	2	1	1
	mec-4	5	17	2	2	0.999847
	mec-4	5	18	2	1	0.0033308
	mec-4	5	18	2	2	0.00730978
	mec-4	5	18	2	3	1
	mec-4	5	18	2	4	0.99997
	mec-4	5	19	2	1	1
	mec-4	5	20	2	1	0.999964
	mec-4	5	20	2	2	0.0089397
	mec-4	5	20	2	3	0.999967
	mec-4	5	20	2	4	0.999997
	mec-4	5	21	2	1	0.999994
	mec-4	5	21	2	2	0.0100265
	mec-4	5	21	2	3	0.00933758
	mec-4	5	21	2	4	0.277368
	mec-4	5	21	2	5	1
	mec-4	5	22	2	1	0.000294755
	mec-4	5	22	2	2	7.52533e-05
	mec-4	5	22	2	3	0.00485623
	mec-4	5	22	2	4	9.67199e-05
	mec-4	5	22	2	5	0.000110081
	mec-4	5	22	2	6	0.00244451
	mec-4	5	22	2	7	0.207108
	mec-4	5	22	2	8	9.46806e-05
	mec-4	5	22	2	9	3.47677e-05
	mec-4	5	22	2	10	0.000130445
	mec-4	5	22	2	11	0.022962
	mec-4	5	22	2	12	1
	mec-4	5	23	2	1	0.00467811
	mec-4	5	23	2	2	0.999996
	mec-4	5	23	2	3	0.949536
	mec-4	5	23	2	4	0.936142
	mec-4	5	23	2	5	7.35339e-07
	mec-4	5	23	2	6	0.999999
	mec-4	5	24	2	1	0.073016
	mec-4	5	24	2	2	0.999992
	mec-4	5	24	2	3	0.00792913
	mec-4	5	24	2	4	0.999647
	mec-4	5	24	2	5	0.0107367
	mec-4	5	24	2	6	0.0386882
	mec-4	5	24	2	7	0.999994
	mec-4	5	25	2	1	0.999979
	mec-4	5	25	2	2	0.996737
	mec-4	5	25	2	3	0.999289
	mec-4	5	25	2	4	0.999993
	mec-4	5	26	2	1	0.00454823
	mec-4	5	26	2	2	0.398719
	mec-4	5	26	2	3	0.00490286
	mec-4	5	26	2	4	0.00483013
	mec-4	5	26	2	5	0.0253052
	mec-4	5	26	2	6	0.00138104
	mec-4	5	26	2	7	0.00103207
	mec-4	5	26	2	8	0.99973
	mec-4	5	26	2	9	0.999999
	mec-4	5	27	2	1	0.000621423
	mec-4	5	27	2	2	1
	mec-4	5	27	2	3	0.999965
	mec-4	5	28	2	1	1
	osm-6	5	29	2	1	1
	osm-6	5	30	2	1	1
	osm-6	5	31	2	1	1
	osm-6	5	32	2	1	1
	osm-6	5	33	2	1	1
	osm-6	5	34	2	1	1
	osm-6	5	35	2	1	0.999989
	osm-6	5	35	2	2	1
	osm-6	5	36	2	1	0.999999
	osm-6	5	37	2	1	1
	osm-6	5	39	2	1	1
	osm-6	5	39	2	2	0.645067
	osm-6	5	40	2	1	0.999966
	osm-6	5	40	2	2	0.999999
	osm-6	5	40	2	3	0.00106261
	osm-6	5	40	2	4	0.996329
	osm-6	5	41	2	1	1
	osm-6	5	41	2	2	0.999945
	osm-6	5	42	2	1	0.999999
	osm-6	5	42	2	2	0.99974
	osm-6	5	43	2	1	1
	osm-6	5	44	2	1	1
	osm-6	5	45	2	1	0.857599
	osm-6	5	45	2	2	0.817807
	osm-6	5	45	2	3	0.999992
	osm-6	5	45	2	4	0.014167
	osm-6	5	45	2	5	0.999919
	osm-6	5	46	2	1	0.999983
	osm-6	5	46	2	2	0.0119068
	osm-6	5	46	2	3	0.00273291
	osm-6	5	46	2	4	0.999991
	osm-6	5	47	2	1	1
	osm-6	5	48	2	1	1
	osm-6	5	50	2	1	0.999997
	osm-6	5	50	2	2	0.999999
	osm-6	5	51	2	1	0.999989
	osm-6	5	51	2	2	0.99999
	osm-6	5	53	2	1	1
	osm-6	5	54	2	1	0.00838437
	osm-6	5	54	2	2	1
	osm-6	5	55	2	1	0.999996
	osm-6	5	55	2	2	0.957493
	well-fed	5	56	2	1	0.993166
	well-fed	5	56	2	2	1
	well-fed	5	57	2	1	3.27353e-05
	well-fed	5	57	2	2	3.02621e-05
	well-fed	5	57	2	3	1
	well-fed	5	58	2	1	7.0721e-05
	well-fed	5	58	2	2	0.0088564
	well-fed	5	58	2	3	0.998778
	well-fed	5	58	2	4	0.999979
	well-fed	5	59	2	1	7.71461e-06
	well-fed	5	59	2	2	0.999985
	well-fed	5	60	2	1	0.542014
	well-fed	5	60	2	2	0.999557
	well-fed	5	60	2	3	1
	well-fed	5	61	2	1	0.985801
	well-fed	5	61	2	2	0.0145072
	well-fed	5	61	2	3	0.999992
	well-fed	5	62	2	1	0.114637
	well-fed	5	62	2	2	0.0012234
	well-fed	5	62	2	3	0.000205132
	well-fed	5	62	2	4	1
	well-fed	5	63	2	1	0.999926
	well-fed	5	63	2	2	0.999983
	well-fed	5	64	2	1	0.999998
	well-fed	5	64	2	2	0.00150959
	well-fed	5	64	2	3	0.999991
	well-fed	5	65	2	1	0.980402
	well-fed	5	65	2	2	3.57641e-05
	well-fed	5	65	2	3	0.944036
	well-fed	5	66	2	1	0.517238
	well-fed	5	66	2	2	0.999998
	well-fed	5	66	2	3	0.990681
	well-fed	5	66	2	4	0.000340437
	well-fed	5	66	2	5	0.998261
	well-fed	5	66	2	6	0.243527
	well-fed	5	67	2	1	0.999997
	well-fed	5	68	2	1	0.000160602
	well-fed	5	68	2	2	1
	well-fed	5	69	2	1	0.000156735
	well-fed	5	69	2	2	0.99957
	well-fed	5	70	2	1	1
	well-fed	5	71	2	1	1
	well-fed	5	71	2	2	0.999899
	well-fed	5	71	2	3	0.969724
	well-fed	5	72	2	1	0.0969506
	well-fed	5	72	2	2	1
	well-fed	5	72	2	3	0.000455467
	well-fed	5	73	2	1	0.320794
	well-fed	5	73	2	2	0.984671
	well-fed	5	73	2	3	0.00657047
	well-fed	5	73	2	4	0.00527421
	well-fed	5	73	2	5	0.999998
	well-fed	5	73	2	6	0.999987
	well-fed	5	74	2	1	0.00723175
	well-fed	5	74	2	2	0.99997
	well-fed	5	74	2	3	0.0110225
	well-fed	5	74	2	4	0.99993
	well-fed	5	74	2	5	0.00135378
	well-fed	5	74	2	6	0.048383
	well-fed	5	74	2	7	0.0230055
	well-fed	5	74	2	8	0.992257
	well-fed	5	74	2	9	0.999806
	well-fed	5	75	2	1	0.999962
	well-fed	5	75	2	2	0.99992
	well-fed	5	75	2	3	0.999999
	well-fed	5	76	2	1	0.999842
	well-fed	5	76	2	2	1
	well-fed	5	76	2	3	0.966384
	well-fed	5	77	2	1	9.61815e-07
	well-fed	5	77	2	2	0.0471234
	well-fed	5	77	2	3	0.999846
	well-fed	5	77	2	4	0.0322047
	well-fed	5	77	2	5	1
	well-fed	5	78	2	1	0.0310672
	well-fed	5	78	2	2	0.172186
	well-fed	5	78	2	3	0.000947821
	well-fed	5	78	2	4	0.000266495
	well-fed	5	78	2	5	0.000151794
	well-fed	5	78	2	6	0.00030672
	well-fed	5	78	2	7	0.999959
	well-fed	5	78	2	8	0.99999
	well-fed	5	79	2	1	0.0317489
	well-fed	5	79	2	2	0.999999
	well-fed	5	79	2	3	0.997351
	well-fed	5	79	2	4	0.999999
	well-fed	5	80	2	1	6.61252e-06
	well-fed	5	80	2	2	0.00286173
	well-fed	5	80	2	3	0.00255054
	well-fed	5	80	2	4	0.999917
	well-fed	5	80	2	5	0.425811
	well-fed	5	80	2	6	0.00164103
	well-fed	5	80	2	7	0.00395194
	well-fed	5	80	2	8	0.999999
	well-fed	5	81	2	1	1
	well-fed	5	82	2	1	0.0158726
	well-fed	5	82	2	2	0.00285962
	well-fed	5	82	2	3	0.298223
	well-fed	5	82	2	4	1
	well-fed	5	83	2	1	0.00773837
	well-fed	5	83	2	2	0.99995
	well-fed	5	83	2	3	0.999359
	well-fed	5	83	2	4	0.999989
	mec-4	1	84	2	1	2.45759e-06
	mec-4	1	84	2	2	0.00013092
	mec-4	1	84	2	3	0.999884
	mec-4	1	84	2	4	3.84072e-05
	mec-4	1	84	2	5	0.0536077
	mec-4	1	84	2	6	0.140094
	mec-4	1	84	2	7	0.999965
	mec-4	1	85	2	1	7.41032e-05
	mec-4	1	85	2	2	0.50582
	mec-4	1	85	2	3	0.926405
	mec-4	1	85	2	4	0.00139276
	mec-4	1	85	2	5	0.963394
	mec-4	1	85	2	6	0.976498
	mec-4	1	85	2	7	0.0103924
	mec-4	1	85	2	8	0.0434347
	mec-4	1	85	2	9	0.00606159
	mec-4	1	86	2	1	0.217125
	mec-4	1	86	2	2	0.0891293
	mec-4	1	86	2	3	0.0234139
	mec-4	1	86	2	4	0.995709
	mec-4	1	86	2	5	0.0327851
	mec-4	1	86	2	6	0.010237
	mec-4	1	86	2	7	0.999875
	mec-4	1	86	2	8	0.000156602
	mec-4	1	86	2	9	0.0220348
	mec-4	1	87	2	1	0.979037
	mec-4	1	87	2	2	0.0523722
	mec-4	1	87	2	3	0.000360072
	mec-4	1	87	2	4	0.0320598
	mec-4	1	87	2	5	0.997235
	mec-4	1	87	2	6	0.000176292
	mec-4	1	87	2	7	0.00103541
	mec-4	1	87	2	8	2.98643e-06
	mec-4	1	87	2	9	0.000104573
	mec-4	1	87	2	10	0.0050293
	mec-4	1	88	2	1	1.25752e-05
	mec-4	1	88	2	2	0.108486
	mec-4	1	88	2	3	8.68103e-05
	mec-4	1	88	2	4	0.0229731
	mec-4	1	88	2	5	0.00601447
	mec-4	1	89	2	1	0.000879176
	mec-4	1	89	2	2	9.37755e-05
	mec-4	1	89	2	3	0.038493
	mec-4	1	89	2	4	0.00117431
	mec-4	1	89	2	5	0.00102193
	mec-4	1	89	2	6	0.00723613
	mec-4	1	89	2	7	5.77254e-06
	mec-4	1	89	2	8	0.000290586
	mec-4	1	89	2	9	0.151878
	mec-4	1	89	2	10	0.996188
	mec-4	1	89	2	11	1.8953e-05
	mec-4	1	90	2	1	0.000200358
	mec-4	1	90	2	2	4.18901e-05
	mec-4	1	90	2	3	8.63708e-05
	mec-4	1	90	2	4	0.0220159
	mec-4	1	90	2	5	0.00141447
	mec-4	1	90	2	6	0.00129939
	mec-4	1	90	2	7	0.00232159
	mec-4	1	91	2	1	5.5501e-05
	mec-4	1	91	2	2	9.5905e-05
	mec-4	1	91	2	3	0.0135606
	mec-4	1	91	2	4	0.00237497
	mec-4	1	91	2	5	0.869687
	mec-4	1	91	2	6	0.012992
	mec-4	1	91	2	7	0.000170267
	mec-4	1	91	2	8	9.13457e-06
	mec-4	1	91	2	9	0.354221
	mec-4	1	91	2	10	0.964008
	mec-4	1	91	2	11	0.860661
	mec-4	1	91	2	12	0.667039
	mec-4	1	92	2	1	0.000267459
	mec-4	1	92	2	2	4.25197e-05
	mec-4	1	92	2	3	0.0627342
	mec-4	1	92	2	4	0.993978
	mec-4	1	92	2	5	0.0823925
	mec-4	1	92	2	6	0.997663
	mec-4	1	92	2	7	0.994452
	mec-4	1	93	2	1	0.0111506
	mec-4	1	93	2	2	0.179199
	mec-4	1	93	2	3	0.0120947
	mec-4	1	93	2	4	0.0317083
	mec-4	1	93	2	5	1.36822e-05
	mec-4	1	93	2	6	4.52588e-06
	mec-4	1	93	2	7	0.00546056
	mec-4	1	93	2	8	0.0136382
	mec-4	1	93	2	9	0.120916
	mec-4	1	93	2	10	0.95471
	mec-4	1	93	2	11	0.0482699
	mec-4	1	93	2	12	0.0013595
	mec-4	1	93	2	13	0.0368454
	mec-4	1	93	2	14	0.87419
	mec-4	1	94	2	1	0.00163652
	mec-4	1	94	2	2	0.086725
	mec-4	1	94	2	3	0.0104037
	mec-4	1	94	2	4	0.00222542
	mec-4	1	94	2	5	0.021223
	mec-4	1	94	2	6	0.999565
	mec-4	1	94	2	7	7.24597e-05
	mec-4	1	94	2	8	0.00195592
	mec-4	1	94	2	9	0.169406
	mec-4	1	95	2	1	9.14899e-06
	mec-4	1	95	2	2	0.999942
	mec-4	1	95	2	3	0.991826
	mec-4	1	96	2	1	0.000227313
	mec-4	1	96	2	2	0.0101909
	mec-4	1	96	2	3	0.99317
	mec-4	1	96	2	4	0.000163494
	mec-4	1	96	2	5	0.000856888
	mec-4	1	96	2	6	0.989768
	mec-4	1	97	2	1	0.999363
	mec-4	1	97	2	2	0.938811
	mec-4	1	97	2	3	0.991552
	mec-4	1	98	2	1	0.000916969
	mec-4	1	98	2	2	0.0025298
	mec-4	1	98	2	3	0.999719
	mec-4	1	98	2	4	6.03623e-05
	mec-4	1	98	2	5	0.996664
	mec-4	1	99	2	1	2.52522e-06
	mec-4	1	99	2	2	0.00167313
	mec-4	1	99	2	3	0.999891
	mec-4	1	99	2	4	0.999915
	osm-6	1	100	2	1	0.00676628
	osm-6	1	100	2	2	0.345542
	osm-6	1	100	2	3	0.999109
	osm-6	1	100	2	4	0.999994
	osm-6	1	101	2	1	0.00677897
	osm-6	1	101	2	2	0.999547
	osm-6	1	101	2	3	0.979349
	osm-6	1	102	2	1	0.966923
	osm-6	1	102	2	2	0.129472
	osm-6	1	102	2	3	0.00931479
	osm-6	1	102	2	4	0.00882477
	osm-6	1	102	2	5	0.99504
	osm-6	1	102	2	6	0.820567
	osm-6	1	102	2	7	1.20459e-05
	osm-6	1	102	2	8	0.995119
	osm-6	1	103	2	1	0.999459
	osm-6	1	104	2	1	0.990916
	osm-6	1	104	2	2	0.999999
	osm-6	1	105	2	1	0.999589
	osm-6	1	105	2	2	0.770571
	osm-6	1	106	2	1	0.00124364
	osm-6	1	106	2	2	0.999986
	osm-6	1	106	2	3	0.0277636
	osm-6	1	107	2	1	0.222057
	osm-6	1	107	2	2	0.99962
	osm-6	1	107	2	3	0.125728
	osm-6	1	107	2	4	0.571823
	osm-6	1	107	2	5	0.999661
	osm-6	1	107	2	6	3.38609e-05
	osm-6	1	108	2	1	0.999908
	osm-6	1	108	2	2	0.999545
	osm-6	1	108	2	3	0.00618426
	osm-6	1	109	2	1	0.999999
	osm-6	1	109	2	2	0.988873
	osm-6	1	110	2	1	0.999999
	osm-6	1	110	2	2	0.98041
	osm-6	1	110	2	3	0.000705102
	osm-6	1	111	2	1	0.999272
	osm-6	1	111	2	2	0.992823
	osm-6	1	111	2	3	0.259171
	osm-6	1	111	2	4	0.999983
	osm-6	1	112	2	1	0.985883
	osm-6	1	113	2	1	0.840543
	osm-6	1	113	2	2	0.984056
	osm-6	1	113	2	3	1
	well-fed	1	114	2	1	0.0253957
	well-fed	1	114	2	2	0.21305
	well-fed	1	114	2	3	0.999748
	well-fed	1	114	2	4	0.999487
	well-fed	1	114	2	5	7.87439e-05
	well-fed	1	115	2	1	0.00463396
	well-fed	1	115	2	2	0.00342426
	well-fed	1	115	2	3	0.999989
	well-fed	1	116	2	1	0.101382
	well-fed	1	116	2	2	0.471591
	well-fed	1	116	2	3	2.23269e-05
	well-fed	1	116	2	4	9.5146e-06
	well-fed	1	116	2	5	8.85826e-05
	well-fed	1	116	2	6	4.99855e-07
	well-fed	1	116	2	7	2.43252e-06
	well-fed	1	116	2	8	0.0107115
	well-fed	1	116	2	9	0.0315699
	well-fed	1	117	2	1	0.000132229
	well-fed	1	117	2	2	0.321536
	well-fed	1	117	2	3	6.55943e-05
	well-fed	1	117	2	4	0.150108
	well-fed	1	117	2	5	5.45453e-05
	well-fed	1	117	2	6	8.19823e-06
	well-fed	1	117	2	7	0.99738
	well-fed	1	118	2	1	0.106454
	well-fed	1	118	2	2	0.00594957
	well-fed	1	118	2	3	0.99906
	well-fed	1	118	2	4	0.000537455
	well-fed	1	119	2	1	0.00134215
	well-fed	1	119	2	2	8.06791e-05
	well-fed	1	119	2	3	0.00541135
	well-fed	1	119	2	4	0.000245948
	well-fed	1	119	2	5	3.58862e-06
	well-fed	1	119	2	6	0.018775
	well-fed	1	119	2	7	0.976503
	well-fed	1	119	2	8	0.0339948
	well-fed	1	120	2	1	6.10093e-05
	well-fed	1	120	2	2	0.999927
	well-fed	1	120	2	3	0.37384
	well-fed	1	120	2	4	0.999953
	well-fed	1	121	2	1	0.00706774
	well-fed	1	121	2	2	0.0548863
	well-fed	1	121	2	3	9.31184e-05
	well-fed	1	121	2	4	0.0334692
	well-fed	1	121	2	5	0.0196295
	well-fed	1	121	2	6	0.00747697
	well-fed	1	121	2	7	0.545002
	well-fed	1	122	2	1	0.000496571
	well-fed	1	122	2	2	0.00125091
	well-fed	1	122	2	3	0.00157361
	well-fed	1	122	2	4	0.189027
	well-fed	1	122	2	5	0.070828
	well-fed	1	122	2	6	0.00423199
	well-fed	1	122	2	7	0.999996
	well-fed	1	123	2	1	3.4229e-06
	well-fed	1	123	2	2	0.000106941
	well-fed	1	123	2	3	0.00166356
	well-fed	1	123	2	4	0.021743
	well-fed	1	123	2	5	0.00119694
	well-fed	1	123	2	6	0.00867362
	well-fed	1	123	2	7	0.0231145
	well-fed	1	123	2	8	0.0197254
	well-fed	1	123	2	9	0.387941
	well-fed	1	124	2	1	4.66397e-05
	well-fed	1	124	2	2	6.27088e-05
	well-fed	1	124	2	3	0.999978
	well-fed	1	124	2	4	0.983834
	well-fed	1	124	2	5	0.000332498
	well-fed	1	124	2	6	0.00239914
	well-fed	1	124	2	7	0.00385079
	well-fed	1	124	2	8	0.000308985
	well-fed	1	125	2	1	0.00526827
	well-fed	1	125	2	2	0.000179029
	well-fed	1	125	2	3	0.988563
	well-fed	1	125	2	4	7.26666e-05
	well-fed	1	125	2	5	0.0402688
	well-fed	1	125	2	6	0.00520682
	well-fed	1	125	2	7	0.00441635
	well-fed	1	125	2	8	0.000362571
	well-fed	1	125	2	9	0.99402
	well-fed	1	126	2	1	6.73748e-05
	well-fed	1	126	2	2	0.000397624
	well-fed	1	126	2	3	0.999816
	well-fed	1	126	2	4	0.0144022
	well-fed	1	126	2	5	0.01839
	well-fed	1	126	2	6	0.0299836
	well-fed	1	126	2	7	0.887433
	well-fed	1	126	2	8	0.00594911
	well-fed	1	127	2	1	0.0288817
	well-fed	1	127	2	2	0.987484
	well-fed	1	127	2	3	0.0163582
	mec-4	10	128	2	1	0.000170251
	mec-4	10	128	2	2	0.000840946
	mec-4	10	128	2	3	0.999947
	mec-4	10	128	2	4	0.0146543
	mec-4	10	128	2	5	0.999985
	mec-4	10	128	2	6	0.999861
	mec-4	10	129	2	1	0.000766428
	mec-4	10	129	2	2	1.03038e-05
	mec-4	10	129	2	3	0.00018344
	mec-4	10	129	2	4	0.991843
	mec-4	10	129	2	5	0.99491
	mec-4	10	129	2	6	0.217078
	mec-4	10	129	2	7	0.00659059
	mec-4	10	129	2	8	0.0183931
	mec-4	10	129	2	9	0.998726
	mec-4	10	129	2	10	0.999985
	mec-4	10	130	2	1	0.000756508
	mec-4	10	130	2	2	0.241474
	mec-4	10	130	2	3	0.264445
	mec-4	10	130	2	4	1
	mec-4	10	131	2	1	0.0062979
	mec-4	10	131	2	2	0.999989
	mec-4	10	131	2	3	0.000180938
	mec-4	10	131	2	4	0.030396
	mec-4	10	131	2	5	0.999998
	mec-4	10	131	2	6	0.000519421
	mec-4	10	131	2	7	0.999506
	mec-4	10	132	2	1	0.999992
	mec-4	10	132	2	2	1
	mec-4	10	133	2	1	0.999965
	mec-4	10	133	2	2	0.0086801
	mec-4	10	133	2	3	0.000515058
	mec-4	10	133	2	4	0.00394023
	mec-4	10	133	2	5	0.999937
	mec-4	10	133	2	6	0.000511085
	mec-4	10	133	2	7	0.905127
	mec-4	10	134	2	1	0.99999
	mec-4	10	134	2	2	0.00129623
	mec-4	10	134	2	3	0.999674
	mec-4	10	134	2	4	0.999981
	mec-4	10	135	2	1	1
	mec-4	10	135	2	2	0.99959
	mec-4	10	135	2	3	0.999469
	mec-4	10	135	2	4	0.844445
	mec-4	10	136	2	1	0.0877656
	mec-4	10	136	2	2	0.999737
	mec-4	10	136	2	3	0.999992
	mec-4	10	137	2	1	0.000640121
	mec-4	10	137	2	2	0.998882
	mec-4	10	137	2	3	0.0110716
	mec-4	10	137	2	4	0.0162364
	mec-4	10	137	2	5	0.999982
	mec-4	10	137	2	6	0.905771
	mec-4	10	138	2	1	1.35628e-05
	mec-4	10	138	2	2	0.00423944
	mec-4	10	138	2	3	1
	mec-4	10	139	2	1	6.80621e-05
	mec-4	10	139	2	2	0.000295315
	mec-4	10	139	2	3	0.999999
	mec-4	10	140	2	1	0.501135
	mec-4	10	140	2	2	0.0200575
	mec-4	10	140	2	3	0.00128557
	mec-4	10	140	2	4	0.00156844
	mec-4	10	140	2	5	0.000442559
	mec-4	10	140	2	6	0.000770084
	mec-4	10	140	2	7	0.999978
	mec-4	10	141	2	1	1.30146e-05
	mec-4	10	141	2	2	0.999986
	mec-4	10	141	2	3	2.77372e-05
	mec-4	10	141	2	4	0.999998
	mec-4	10	142	2	1	0.00195978
	mec-4	10	142	2	2	0.0173193
	mec-4	10	142	2	3	0.999662
	mec-4	10	142	2	4	0.000118504
	mec-4	10	142	2	5	0.999996
	mec-4	10	143	2	1	0.0964128
	mec-4	10	143	2	2	0.999876
	mec-4	10	143	2	3	1
	osm-6	10	144	2	1	0.999929
	osm-6	10	144	2	2	0.999908
	osm-6	10	145	2	1	0.999997
	osm-6	10	145	2	2	0.999999
	osm-6	10	146	2	1	0.999836
	osm-6	10	146	2	2	0.999996
	osm-6	10	147	2	1	0.999978
	osm-6	10	148	2	1	1
	osm-6	10	149	2	1	0.757698
	osm-6	10	149	2	2	1
	osm-6	10	150	2	1	1
	osm-6	10	151	2	1	0.00504741
	osm-6	10	152	2	1	0.999998
	osm-6	10	152	2	2	0.999998
	osm-6	10	153	2	1	0.000897888
	osm-6	10	153	2	2	0.999004
	osm-6	10	153	2	3	0.999976
	osm-6	10	154	2	1	0.988887
	osm-6	10	155	2	1	1
	osm-6	10	155	2	2	0.999978
	osm-6	10	156	2	1	1
	osm-6	10	157	2	1	1
	osm-6	10	158	2	1	0.999993
	osm-6	10	158	2	2	0.999399
	osm-6	10	158	2	3	0.996879
	osm-6	10	158	2	4	0.225507
	well-fed	10	159	2	1	0.000295158
	well-fed	10	159	2	2	0.0129928
	well-fed	10	159	2	3	0.99137
	well-fed	10	159	2	4	1
	well-fed	10	160	2	1	0.00371413
	well-fed	10	160	2	2	0.000302095
	well-fed	10	160	2	3	0.0752185
	well-fed	10	160	2	4	0.000143004
	well-fed	10	160	2	5	1.0327e-05
	well-fed	10	160	2	6	0.000933383
	well-fed	10	160	2	7	1
	well-fed	10	161	2	1	0.877242
	well-fed	10	161	2	2	2.55138e-05
	well-fed	10	161	2	3	3.74489e-05
	well-fed	10	161	2	4	0.978726
	well-fed	10	161	2	5	0.977827
	well-fed	10	161	2	6	0.0372607
	well-fed	10	161	2	7	0.000479222
	well-fed	10	161	2	8	0.000471026
	well-fed	10	161	2	9	3.67667e-06
	well-fed	10	161	2	10	0.0112839
	well-fed	10	161	2	11	0.000105456
	well-fed	10	161	2	12	0.999986
	well-fed	10	162	2	1	0.000235634
	well-fed	10	162	2	2	0.000130841
	well-fed	10	162	2	3	0.000446023
	well-fed	10	162	2	4	1
	well-fed	10	163	2	1	0.0133853
	well-fed	10	163	2	2	0.00122603
	well-fed	10	163	2	3	0.999952
	well-fed	10	163	2	4	1
	well-fed	10	164	2	1	0.998887
	well-fed	10	164	2	2	0.999996
	well-fed	10	164	2	3	0.999992
	well-fed	10	165	2	1	0.00464723
	well-fed	10	165	2	2	2.07612e-05
	well-fed	10	165	2	3	0.00853865
	well-fed	10	165	2	4	2.61881e-05
	well-fed	10	165	2	5	0.999957
	well-fed	10	165	2	6	0.999973
	well-fed	10	166	2	1	0.000622098
	well-fed	10	166	2	2	1
	well-fed	10	167	2	1	0.00476595
	well-fed	10	167	2	2	0.00237998
	well-fed	10	167	2	3	0.999999
	well-fed	10	168	2	1	0.0129527
	well-fed	10	168	2	2	0.00300162
	well-fed	10	168	2	3	0.999956
	well-fed	10	168	2	4	0.56515
	well-fed	10	168	2	5	0.999986
	well-fed	10	168	2	6	0.00160346
	well-fed	10	168	2	7	0.994387
	well-fed	10	170	2	1	0.0665472
	well-fed	10	170	2	2	1
	well-fed	10	171	2	1	0.999986
	well-fed	10	171	2	2	0.000152888
	well-fed	10	171	2	3	0.999956
	well-fed	10	171	2	4	0.999783
	well-fed	10	172	2	1	1
	well-fed	10	173	2	1	0.000608899
	well-fed	10	173	2	2	0.190322
	well-fed	10	173	2	3	0.0110382
	well-fed	10	173	2	4	0.999547
	well-fed	10	173	2	5	0.999994
	well-fed	10	173	2	6	0.999803
	well-fed	10	174	2	1	9.9654e-05
	well-fed	10	174	2	2	0.719523
	well-fed	10	174	2	3	0.00433648
	well-fed	10	174	2	4	0.179049
	well-fed	10	174	2	5	1
	mec-4	5	175	2	1	0.99733
	mec-4	5	175	2	2	6.19701e-05
	mec-4	5	175	2	3	0.999822
	mec-4	5	175	2	4	0.000773438
	mec-4	5	175	2	5	0.00236856
	mec-4	5	175	2	6	0.00013453
	mec-4	5	175	2	7	0.125606
	mec-4	5	175	2	8	0.999986
	mec-4	5	176	2	1	8.16815e-07
	mec-4	5	176	2	2	1
	mec-4	5	177	2	1	0.147871
	mec-4	5	177	2	2	0.99985
	mec-4	5	177	2	3	0.999996
	mec-4	5	177	2	4	0.159779
	mec-4	5	177	2	5	0.0339101
	mec-4	5	177	2	6	0.00240931
	mec-4	5	177	2	7	0.969829
	mec-4	5	178	2	1	0.00418453
	mec-4	5	178	2	2	0.00367457
	mec-4	5	178	2	3	0.999996
	mec-4	5	178	2	4	0.0669608
	mec-4	5	178	2	5	0.179307
	mec-4	5	178	2	6	0.99977
	mec-4	5	179	2	1	0.000867408
	mec-4	5	179	2	2	0.00612647
	mec-4	5	179	2	3	0.997459
	mec-4	5	179	2	4	0.0265097
	mec-4	5	179	2	5	0.00062201
	mec-4	5	179	2	6	1
	mec-4	5	180	2	1	0.00249162
	mec-4	5	180	2	2	0.0109826
	mec-4	5	180	2	3	0.260337
	mec-4	5	180	2	4	0.0069327
	mec-4	5	180	2	5	0.00100666
	mec-4	5	180	2	6	0.00259278
	mec-4	5	180	2	7	1
	mec-4	5	181	2	1	2.17713e-05
	mec-4	5	181	2	2	0.0339502
	mec-4	5	181	2	3	1
	mec-4	5	182	2	1	8.5761e-05
	mec-4	5	182	2	2	0.00113982
	mec-4	5	182	2	3	0.00410287
	mec-4	5	182	2	4	0.000604732
	mec-4	5	182	2	5	0.00074581
	mec-4	5	182	2	6	0.000317219
	mec-4	5	182	2	7	1
	mec-4	5	183	2	1	0.00237189
	mec-4	5	183	2	2	0.0053897
	mec-4	5	183	2	3	0.0083775
	mec-4	5	183	2	4	0.0190439
	mec-4	5	183	2	5	0.999962
	mec-4	5	183	2	6	0.000124156
	mec-4	5	183	2	7	0.999977
	mec-4	5	184	2	1	0.0887136
	mec-4	5	184	2	2	0.999992
	mec-4	5	184	2	3	0.999974
	mec-4	5	185	2	1	0.0125984
	mec-4	5	185	2	2	0.994506
	mec-4	5	185	2	3	0.999591
	mec-4	5	185	2	4	0.999999
	mec-4	5	186	2	1	0.00291418
	mec-4	5	186	2	2	1
	mec-4	5	187	2	1	0.998627
	mec-4	5	187	2	2	6.00238e-05
	mec-4	5	187	2	3	0.000791083
	mec-4	5	187	2	4	0.0388782
	mec-4	5	187	2	5	0.999956
	mec-4	5	187	2	6	0.999791
	mec-4	5	187	2	7	0.994438
	mec-4	5	188	2	1	0.000111133
	mec-4	5	188	2	2	0.114853
	mec-4	5	188	2	3	4.47199e-05
	mec-4	5	188	2	4	0.000895665
	mec-4	5	188	2	5	0.999932
	mec-4	5	188	2	6	0.00307079
	mec-4	5	189	2	1	0.987937
	mec-4	5	189	2	2	0.999999
	mec-4	5	189	2	3	0.0163153
	mec-4	5	189	2	4	0.98069
	mec-4	5	190	2	1	0.530154
	mec-4	5	190	2	2	0.00022532
	mec-4	5	190	2	3	0.000592599
	mec-4	5	190	2	4	1
	osm-6	5	191	2	1	0.999948
	osm-6	5	191	2	2	0.99982
	osm-6	5	191	2	3	0.999992
	osm-6	5	191	2	4	0.46505
	osm-6	5	192	2	1	0.999999
	osm-6	5	193	2	1	1
	osm-6	5	194	2	1	1
	osm-6	5	195	2	1	1
	osm-6	5	195	2	2	0.999998
	osm-6	5	196	2	1	0.988583
	osm-6	5	196	2	2	0.203955
	osm-6	5	196	2	3	0.994936
	osm-6	5	196	2	4	0.999987
	osm-6	5	197	2	1	0.307742
	osm-6	5	197	2	2	0.999999
	osm-6	5	198	2	1	1
	osm-6	5	199	2	1	1
	osm-6	5	201	2	1	1
	osm-6	5	202	2	1	1
	osm-6	5	203	2	1	1
	osm-6	5	204	2	1	1
	osm-6	5	205	2	1	0.0413387
	osm-6	5	205	2	2	0.0556316
	well-fed	5	206	2	1	0.0535292
	well-fed	5	206	2	2	0.998584
	well-fed	5	206	2	3	0.935161
	well-fed	5	206	2	4	0.997822
	well-fed	5	206	2	5	1
	well-fed	5	207	2	1	0.000680939
	well-fed	5	207	2	2	0.999821
	well-fed	5	207	2	3	0.999896
	well-fed	5	207	2	4	0.00166206
	well-fed	5	207	2	5	0.182532
	well-fed	5	208	2	1	0.00257251
	well-fed	5	208	2	2	0.312792
	well-fed	5	208	2	3	1
	well-fed	5	209	2	1	0.00325794
	well-fed	5	209	2	2	0.999981
	well-fed	5	209	2	3	0.00168645
	well-fed	5	209	2	4	0.999843
	well-fed	5	209	2	5	0.000501221
	well-fed	5	209	2	6	0.000230786
	well-fed	5	209	2	7	0.982936
	well-fed	5	209	2	8	0.999382
	well-fed	5	210	2	1	0.00226293
	well-fed	5	210	2	2	0.928345
	well-fed	5	210	2	3	0.999773
	well-fed	5	210	2	4	0.00406057
	well-fed	5	210	2	5	0.999079
	well-fed	5	211	2	1	0.0255049
	well-fed	5	211	2	2	0.000102627
	well-fed	5	211	2	3	0.0177459
	well-fed	5	211	2	4	0.000197392
	well-fed	5	211	2	5	0.999306
	well-fed	5	212	2	1	0.997853
	well-fed	5	212	2	2	0.999585
	well-fed	5	212	2	3	0.405282
	well-fed	5	212	2	4	0.99999
	well-fed	5	213	2	1	0.996665
	well-fed	5	213	2	2	0.00373686
	well-fed	5	213	2	3	0.00525138
	well-fed	5	213	2	4	0.00537597
	well-fed	5	213	2	5	0.995916
	well-fed	5	213	2	6	0.99976
	well-fed	5	213	2	7	0.000151382
	well-fed	5	213	2	8	0.015441
	well-fed	5	213	2	9	0.0183206
	well-fed	5	213	2	10	0.999252
	well-fed	5	214	2	1	0.0164115
	well-fed	5	214	2	2	0.00118627
	well-fed	5	214	2	3	0.999992
	well-fed	5	214	2	4	0.999975
	well-fed	5	215	2	1	0.000289168
	well-fed	5	215	2	2	0.999767
	well-fed	5	215	2	3	0.999974
	well-fed	5	216	2	1	0.999996
	well-fed	5	216	2	2	0.999999
	well-fed	5	217	2	1	0.00253448
	well-fed	5	217	2	2	4.87286e-06
	well-fed	5	217	2	3	0.999997
	well-fed	5	218	2	1	0.00102048
	well-fed	5	218	2	2	0.999991
	well-fed	5	218	2	3	0.0306844
	well-fed	5	219	2	1	2.38195e-05
	well-fed	5	219	2	2	0.999988
	well-fed	5	220	2	1	0.00307107
	well-fed	5	220	2	2	0.000430639
	well-fed	5	220	2	3	0.000608628
	well-fed	5	220	2	4	0.901891
	well-fed	5	220	2	5	1
	well-fed	5	221	2	1	0.012938
	well-fed	5	221	2	2	0.273707
	well-fed	5	221	2	3	0.999239
	well-fed	5	221	2	4	0.999969
	well-fed	5	221	2	5	0.999677
	mec-4	5	1	3	1	0.999973
	mec-4	5	1	3	2	0.999999
	mec-4	5	1	3	3	0.0547538
	mec-4	5	1	3	4	0.00191844
	mec-4	5	1	3	5	0.999904
	mec-4	5	2	3	1	1
	mec-4	5	2	3	2	0.00558375
	mec-4	5	3	3	1	0.245398
	mec-4	5	3	3	2	0.165659
	mec-4	5	3	3	3	7.62142e-06
	mec-4	5	3	3	4	0.999528
	mec-4	5	3	3	5	0.0329165
	mec-4	5	3	3	6	1
	mec-4	5	3	3	7	0.00110545
	mec-4	5	3	3	8	0.98376
	mec-4	5	4	3	1	0.000600626
	mec-4	5	4	3	2	0.000317075
	mec-4	5	4	3	3	0.999714
	mec-4	5	4	3	4	1
	mec-4	5	5	3	1	0.243805
	mec-4	5	5	3	2	1
	mec-4	5	5	3	3	2.4734e-05
	mec-4	5	5	3	4	0.999268
	mec-4	5	5	3	5	0.0031716
	mec-4	5	5	3	6	0.997452
	mec-4	5	6	3	1	0.00229417
	mec-4	5	6	3	2	0.00446944
	mec-4	5	6	3	3	0.998505
	mec-4	5	6	3	4	0.00117288
	mec-4	5	6	3	5	0.999943
	mec-4	5	6	3	6	0.00144965
	mec-4	5	6	3	7	0.00012799
	mec-4	5	6	3	8	0.959732
	mec-4	5	7	3	1	0.999996
	mec-4	5	7	3	2	0.0360132
	mec-4	5	7	3	3	9.88262e-05
	mec-4	5	7	3	4	0.00232479
	mec-4	5	7	3	5	0.993254
	mec-4	5	7	3	6	0.000225491
	mec-4	5	7	3	7	0.0010996
	mec-4	5	8	3	1	4.42988e-06
	mec-4	5	8	3	2	0.00025007
	mec-4	5	8	3	3	0.000140375
	mec-4	5	8	3	4	1
	mec-4	5	9	3	1	0.0370058
	mec-4	5	9	3	2	0.000734296
	mec-4	5	9	3	3	0.999999
	mec-4	5	9	3	4	0.999769
	mec-4	5	9	3	5	0.999714
	mec-4	5	10	3	1	0.999999
	mec-4	5	10	3	2	0.734187
	mec-4	5	10	3	3	0.999996
	mec-4	5	11	3	1	1
	mec-4	5	12	3	1	1
	mec-4	5	13	3	1	1.593e-05
	mec-4	5	13	3	2	0.000137059
	mec-4	5	13	3	3	0.295582
	mec-4	5	13	3	4	0.518747
	mec-4	5	13	3	5	0.0119024
	mec-4	5	13	3	6	1
	mec-4	5	13	3	7	0.0153006
	mec-4	5	14	3	1	0.0414836
	mec-4	5	14	3	2	0.23292
	mec-4	5	14	3	3	0.999606
	mec-4	5	14	3	4	1
	mec-4	5	15	3	1	0.999999
	mec-4	5	15	3	2	0.649637
	mec-4	5	15	3	3	0.000377147
	mec-4	5	15	3	4	1.59546e-07
	mec-4	5	15	3	5	0.0862519
	mec-4	5	15	3	6	0.99969
	mec-4	5	16	3	1	0.0919316
	mec-4	5	16	3	2	1
	mec-4	5	16	3	3	0.999959
	mec-4	5	17	3	1	1
	mec-4	5	17	3	2	0.999847
	mec-4	5	18	3	1	0.00730978
	mec-4	5	18	3	2	1
	mec-4	5	18	3	3	0.99997
	mec-4	5	19	3	1	1
	mec-4	5	20	3	1	0.999964
	mec-4	5	20	3	2	0.0089397
	mec-4	5	20	3	3	0.999967
	mec-4	5	20	3	4	0.999997
	mec-4	5	21	3	1	0.999994
	mec-4	5	21	3	2	0.0100265
	mec-4	5	21	3	3	0.00933758
	mec-4	5	21	3	4	0.277368
	mec-4	5	21	3	5	1
	mec-4	5	22	3	1	7.52533e-05
	mec-4	5	22	3	2	0.00485623
	mec-4	5	22	3	3	9.67199e-05
	mec-4	5	22	3	4	0.000110081
	mec-4	5	22	3	5	0.00244451
	mec-4	5	22	3	6	0.207108
	mec-4	5	22	3	7	9.46806e-05
	mec-4	5	22	3	8	3.47677e-05
	mec-4	5	22	3	9	0.000130445
	mec-4	5	22	3	10	0.022962
	mec-4	5	22	3	11	1
	mec-4	5	23	3	1	0.00467811
	mec-4	5	23	3	2	0.999996
	mec-4	5	23	3	3	0.949536
	mec-4	5	23	3	4	0.936142
	mec-4	5	23	3	5	7.35339e-07
	mec-4	5	23	3	6	0.999999
	mec-4	5	24	3	1	0.073016
	mec-4	5	24	3	2	0.999992
	mec-4	5	24	3	3	0.00792913
	mec-4	5	24	3	4	0.999647
	mec-4	5	24	3	5	0.0107367
	mec-4	5	24	3	6	0.0386882
	mec-4	5	24	3	7	0.999994
	mec-4	5	25	3	1	0.999979
	mec-4	5	25	3	2	0.999289
	mec-4	5	25	3	3	0.999993
	mec-4	5	26	3	1	0.00454823
	mec-4	5	26	3	2	0.398719
	mec-4	5	26	3	3	0.00490286
	mec-4	5	26	3	4	0.00483013
	mec-4	5	26	3	5	0.0253052
	mec-4	5	26	3	6	0.00138104
	mec-4	5	26	3	7	0.00103207
	mec-4	5	26	3	8	0.99973
	mec-4	5	26	3	9	0.999999
	mec-4	5	27	3	1	0.000621423
	mec-4	5	27	3	2	1
	mec-4	5	27	3	3	0.999965
	mec-4	5	28	3	1	1
	osm-6	5	29	3	1	1
	osm-6	5	30	3	1	1
	osm-6	5	32	3	1	0.0052903
	osm-6	5	32	3	2	1
	osm-6	5	33	3	1	1
	osm-6	5	34	3	1	1
	osm-6	5	35	3	1	0.999989
	osm-6	5	35	3	2	1
	osm-6	5	37	3	1	1
	osm-6	5	38	3	1	1
	osm-6	5	39	3	1	1
	osm-6	5	40	3	1	0.999966
	osm-6	5	40	3	2	0.323416
	osm-6	5	40	3	3	0.999999
	osm-6	5	40	3	4	0.00106261
	osm-6	5	40	3	5	0.996329
	osm-6	5	41	3	1	1
	osm-6	5	41	3	2	0.999945
	osm-6	5	42	3	1	0.999999
	osm-6	5	42	3	2	0.99974
	osm-6	5	43	3	1	1
	osm-6	5	44	3	1	1
	osm-6	5	45	3	1	0.857599
	osm-6	5	45	3	2	0.817807
	osm-6	5	45	3	3	0.014167
	osm-6	5	45	3	4	0.999919
	osm-6	5	46	3	1	0.999983
	osm-6	5	46	3	2	0.0119068
	osm-6	5	46	3	3	0.999991
	osm-6	5	47	3	1	1
	osm-6	5	48	3	1	1
	osm-6	5	49	3	1	0.999999
	osm-6	5	50	3	1	0.999997
	osm-6	5	50	3	2	0.999999
	osm-6	5	51	3	1	0.999989
	osm-6	5	51	3	2	0.99999
	osm-6	5	52	3	1	1
	osm-6	5	53	3	1	1
	osm-6	5	54	3	1	0.00838437
	osm-6	5	54	3	2	0.99998
	osm-6	5	54	3	3	1
	osm-6	5	55	3	1	0.999996
	osm-6	5	55	3	2	0.957493
	well-fed	5	56	3	1	0.993166
	well-fed	5	56	3	2	1
	well-fed	5	57	3	1	3.02621e-05
	well-fed	5	57	3	2	1
	well-fed	5	58	3	1	0.0088564
	well-fed	5	58	3	2	0.998778
	well-fed	5	58	3	3	0.999979
	well-fed	5	59	3	1	7.71461e-06
	well-fed	5	59	3	2	0.999985
	well-fed	5	60	3	1	0.542014
	well-fed	5	60	3	2	0.999557
	well-fed	5	60	3	3	1
	well-fed	5	61	3	1	0.985801
	well-fed	5	61	3	2	0.0145072
	well-fed	5	61	3	3	0.999992
	well-fed	5	62	3	1	0.114637
	well-fed	5	62	3	2	0.0012234
	well-fed	5	62	3	3	0.000205132
	well-fed	5	62	3	4	1
	well-fed	5	63	3	1	0.999926
	well-fed	5	63	3	2	0.999983
	well-fed	5	64	3	1	0.999998
	well-fed	5	64	3	2	0.00150959
	well-fed	5	64	3	3	0.999991
	well-fed	5	65	3	1	0.980402
	well-fed	5	65	3	2	3.57641e-05
	well-fed	5	65	3	3	1
	well-fed	5	65	3	4	0.944036
	well-fed	5	66	3	1	0.517238
	well-fed	5	66	3	2	0.999998
	well-fed	5	66	3	3	0.990681
	well-fed	5	66	3	4	0.000340437
	well-fed	5	66	3	5	0.998261
	well-fed	5	66	3	6	0.243527
	well-fed	5	67	3	1	0.999997
	well-fed	5	68	3	1	3.50174e-05
	well-fed	5	68	3	2	1
	well-fed	5	69	3	1	0.000156735
[truncated: 85,975 more rows]
