# Supplementary material for: Accept–reject decision-making revealed via a quantitative and ethological study of C. elegans foraging
Source: eLife. 2025 Sep 10;13:RP103191. doi: 10.7554/eLife.103191 (PMC12422737; doi:10.7554/eLife.103191)
Supplement: Figure 4—source data 5. [file elife-103191-fig4-data5.xlsx]

## Sheet: Sheet1
Figure 4 - Source Data 5
Figure 4H - Coefficients of linear regression model
Summary Statistics (N2)
	coefficient	mean	std	median	2.5%	97.5%	λ		* coefficient values fit by logistic regression across 50,000 replicates as described in methods, Figure 4C, and Figure 4 - supplement 1
	β_0	-1.15073	0.295867	-1.1637	-1.70536	-0.543758	0.0175		* regression models were regularized using a ridge parameter λ which was optimized to maximize the mean log-likelihood
	β_k	2.06569	0.345642	2.07208	1.40355	2.71495
	β_s	2.29627	0.71244	2.26865	0.989976	3.81431
	β_h	-0.162645	0.186068	-0.162639	-0.519971	0.205012
	β_e	-0.442335	0.192301	-0.438864	-0.824686	-0.0794167
Summary Statistics (mec-4)
	coefficient	mean	std	median	2.5%	97.5%	λ	p-value	adjusted p-value		* coefficient values fit by logistic regression across 50,000 replicates as described in methods, Figure 4C, and Figure 4 - supplement 1
	β_0	-0.96368	0.252684	-0.960898	-1.47601	-0.465538	0.0223	0.63069	0.788363		* regression models were regularized using a ridge parameter λ which was optimized to maximize the mean log-likelihood
	β_k	1.40122	0.257194	1.40237	0.898628	1.89819		0.0615015	0.153754		* p value calculated using two-sample mean of differences between mec-4 and N2 distribution with Benjamini-Hochberg correction for multiple comparisons
	β_s	1.84129	0.815318	1.81111	0.329756	3.53473		0.674329	0.788363		* one-tailed test for density coefficents β_k, β_h, and β_e (alternative hypothesis = less influence of density in sensory mutants)
	β_h	-0.0417589	0.167127	-0.0416721	-0.369233	0.28268		0.314426	0.514714		* two-tailed test for other coefficients β_0 and β_s (alternative hypothesis = altered influence in sensory mutants)
	β_e	-0.322505	0.143693	-0.322617	-0.604031	-0.0390467		0.308828	0.514714
Summary Statistics (osm-6)
	coefficient	mean	std	median	2.5%	97.5%	λ	p-value	adjusted p-value		* coefficient values fit by logistic regression across 50,000 replicates as described in methods, Figure 4C, and Figure 4 - supplement 1
	β_0	0.363652	0.350356	0.334358	-0.241211	1.13068	0.0614	0.000958595	0.00958595		* regression models were regularized using a ridge parameter λ which was optimized to maximize the mean log-likelihood
	β_k	0.743752	0.437361	0.750365	-0.143003	1.59592		0.00886052	0.0443026		* p value calculated using two-sample mean of differences between osm-6 and N2 distribution with Benjamini-Hochberg correction for multiple comparisons
	β_s	1.97869	1.20982	2.04435	-0.582021	4.21623		0.821046	0.821046		* one-tailed test for density coefficents β_k, β_h, and β_e (alternative hypothesis = less influence of density in sensory mutants)
	β_h	0.159529	0.159233	0.159858	-0.1524	0.47259		0.0941655	0.188331		* two-tailed test for other coefficients β_0 and β_s (alternative hypothesis = altered influence in sensory mutants)
	β_e	0.0540382	0.166094	0.0634383	-0.296437	0.352836		0.0253826	0.0846088
Source Data
	strain	encounter replicate #	bootstrap replicate #	β_0	β_k	β_s	β_h	β_e		* coefficient values for all 50,000 combinations of:
	well-fed	1	1	-1.25213	2.76291	2.93679	-0.404305	-0.538262		100 replicates of probabilistic inclusion of sensed encounters (i.e. included encounters if sense = 1 ~ Bern(p(sense = 1)) where p(sense) was previously estimate in Figure 2I and Figure 2 - supplement 8)
	well-fed	2	1	-1.33105	2.53545	2.10591	-0.464237	-0.251777		500 replicates of hierarchically bootstrapped worms (i.e. resampled all worms with replacement and then included all sensed encounters for those animals)
	well-fed	3	1	-1.02685	2.65204	2.46418	-0.335537	-0.56291
	well-fed	4	1	-1.09335	2.48456	2.97984	0.047266	-0.789523
	well-fed	5	1	-1.2479	2.21325	2.42151	-0.294536	-0.359291
	well-fed	6	1	-1.50314	2.50466	2.24161	-0.394739	-0.197362
	well-fed	7	1	-1.0691	2.87393	2.4369	-0.595163	-0.508605
	well-fed	8	1	-1.57514	2.99628	3.30452	-0.190092	-0.620569
	well-fed	9	1	-0.874536	2.37637	1.65101	-0.409813	-0.401979
	well-fed	10	1	-1.18758	2.42153	2.36109	-0.382073	-0.376841
	well-fed	11	1	-1.20552	2.40402	2.70753	-0.276536	-0.487398
	well-fed	12	1	-1.33486	2.21495	1.369	-0.463842	-0.05627
	well-fed	13	1	-1.26737	2.38303	2.95191	-0.0793597	-0.579543
	well-fed	14	1	-1.17565	2.47235	2.41823	-0.495444	-0.356321
	well-fed	15	1	-1.12013	2.42728	2.31618	-0.195757	-0.506274
	well-fed	16	1	-1.10938	2.39046	2.34036	-0.36294	-0.411074
	well-fed	17	1	-1.13075	2.84939	3.0923	-0.304086	-0.686365
	well-fed	18	1	-1.25777	2.57512	2.2438	-0.556382	-0.355238
	well-fed	19	1	-1.20708	2.57062	1.78291	-0.568987	-0.264575
	well-fed	20	1	-1.13211	2.31309	2.21769	-0.350574	-0.420778
	well-fed	21	1	-1.18535	2.66657	2.1203	-0.623226	-0.32943
	well-fed	22	1	-1.17463	2.53024	2.26132	-0.329713	-0.414946
	well-fed	23	1	-1.07693	2.75637	2.58714	-0.55666	-0.5329
	well-fed	24	1	-1.31416	2.4904	2.5681	-0.354116	-0.370555
	well-fed	25	1	-1.23655	2.28979	2.43131	-0.1964	-0.429671
	well-fed	26	1	-1.32514	2.31206	2.39047	-0.305029	-0.340364
	well-fed	27	1	-1.2863	2.45095	2.25029	-0.425775	-0.307293
	well-fed	28	1	-1.21323	2.52433	2.46915	-0.309722	-0.479107
	well-fed	29	1	-1.20127	2.44125	2.37455	-0.336881	-0.403088
	well-fed	30	1	-1.50603	2.44356	2.20596	-0.340172	-0.183512
	well-fed	31	1	-1.31375	2.54242	2.20652	-0.438387	-0.307279
	well-fed	32	1	-1.1265	2.56019	1.98385	-0.691353	-0.25707
	well-fed	33	1	-1.20462	2.60653	2.09321	-0.414763	-0.344388
	well-fed	34	1	-1.07281	2.45057	2.36808	-0.228989	-0.57416
	well-fed	35	1	-1.12079	2.64294	2.48031	-0.181019	-0.605129
	well-fed	36	1	-1.21513	2.43813	2.06218	-0.32325	-0.374444
	well-fed	37	1	-1.22598	2.57221	2.22775	-0.297834	-0.449164
	well-fed	38	1	-1.14855	2.44676	2.34149	-0.505271	-0.382381
	well-fed	39	1	-1.20937	2.26783	2.49033	-0.126871	-0.488698
	well-fed	40	1	-1.21394	2.57421	2.30785	-0.335852	-0.434114
	well-fed	41	1	-1.16022	2.61881	2.39507	-0.407463	-0.453003
	well-fed	42	1	-1.07708	2.51196	1.93622	-0.416198	-0.468577
	well-fed	43	1	-1.24842	2.35409	2.40253	-0.238895	-0.395914
	well-fed	44	1	-1.27105	2.40754	2.98425	-0.049962	-0.58486
	well-fed	45	1	-1.2462	2.53795	2.18367	-0.481608	-0.294084
	well-fed	46	1	-1.34905	2.74638	2.69305	-0.519887	-0.38085
	well-fed	47	1	-1.24245	2.87983	2.962	-0.0965847	-0.758227
	well-fed	48	1	-1.39995	2.98628	2.40842	-0.551816	-0.37572
	well-fed	49	1	-1.12058	2.49942	1.91491	-0.52238	-0.322176
	well-fed	50	1	-1.20699	2.44745	2.60293	-0.28468	-0.440066
	well-fed	51	1	-1.10088	2.21183	2.15072	-0.339729	-0.342437
	well-fed	52	1	-1.29556	2.46326	2.27076	-0.440822	-0.290287
	well-fed	53	1	-0.925248	2.57933	2.27831	-0.248249	-0.648674
	well-fed	54	1	-1.13984	2.86847	2.50527	-0.485077	-0.532416
	well-fed	55	1	-1.10439	2.42096	2.30332	-0.318624	-0.452166
	well-fed	56	1	-1.3873	2.753	2.35199	-0.452097	-0.321195
	well-fed	57	1	-0.948781	2.5602	2.34017	-0.334036	-0.572087
	well-fed	58	1	-1.16015	2.33031	1.73658	-0.425767	-0.23257
	well-fed	59	1	-1.21175	2.28392	2.41551	-0.122746	-0.467905
	well-fed	60	1	-0.946989	2.37622	1.87224	-0.487681	-0.401677
	well-fed	61	1	-1.23508	2.6712	2.58452	-0.457107	-0.440534
	well-fed	62	1	-1.08313	2.64715	2.05126	-0.67786	-0.320563
	well-fed	63	1	-1.15661	2.48943	2.40184	-0.369294	-0.461117
	well-fed	64	1	-1.1959	2.43637	2.08241	-0.299272	-0.362951
	well-fed	65	1	-1.15201	2.56693	2.27516	-0.322649	-0.455578
	well-fed	66	1	-1.11424	2.70368	2.15564	-0.497599	-0.446727
	well-fed	67	1	-1.11552	2.36443	2.42763	-0.166366	-0.534287
	well-fed	68	1	-1.09669	2.47664	2.85266	-0.109664	-0.662234
	well-fed	69	1	-1.10545	2.54529	2.14027	-0.379467	-0.423175
	well-fed	70	1	-1.16074	2.69638	2.4212	-0.601137	-0.405057
	well-fed	71	1	-1.18961	2.60958	2.17282	-0.535571	-0.353367
	well-fed	72	1	-1.17379	2.6125	2.22164	-0.596379	-0.373445
	well-fed	73	1	-1.31103	2.22634	1.89992	-0.345168	-0.215837
	well-fed	74	1	-1.36531	2.5085	2.47064	-0.398125	-0.297161
	well-fed	75	1	-1.07778	2.40613	2.29227	-0.210714	-0.511798
	well-fed	76	1	-1.29363	2.40206	2.62882	-0.228961	-0.445807
	well-fed	77	1	-1.11018	2.46765	2.12969	-0.273541	-0.464357
	well-fed	78	1	-1.20279	2.32158	1.60172	-0.603906	-0.154559
	well-fed	79	1	-1.10746	2.36999	2.2784	-0.367006	-0.435679
	well-fed	80	1	-1.27104	2.40919	2.33964	-0.255483	-0.378973
	well-fed	81	1	-1.08264	2.53431	2.35537	-0.316204	-0.518427
	well-fed	82	1	-1.29109	2.68178	2.45298	-0.512083	-0.318327
	well-fed	83	1	-1.10723	2.34936	1.96163	-0.277365	-0.386152
	well-fed	84	1	-1.24856	2.50314	2.81806	-0.16032	-0.560108
	well-fed	85	1	-1.45358	2.63357	2.0012	-0.662577	-0.0797053
	well-fed	86	1	-1.39002	2.38076	2.06713	-0.468331	-0.168481
	well-fed	87	1	-1.34823	2.80323	1.97915	-0.577876	-0.203858
	well-fed	88	1	-1.04169	2.66483	2.47162	-0.438921	-0.532517
	well-fed	89	1	-1.08813	2.75187	3.00353	-0.267354	-0.702364
	well-fed	90	1	-1.20607	2.43608	2.21989	-0.372352	-0.39752
	well-fed	91	1	-1.19558	2.45855	2.24345	-0.382897	-0.405648
	well-fed	92	1	-1.19907	2.38625	2.41827	-0.350932	-0.405889
	well-fed	93	1	-1.21583	2.40333	2.33445	-0.334833	-0.386888
	well-fed	94	1	-1.20728	2.24302	2.79606	-0.137842	-0.509828
	well-fed	95	1	-1.10431	2.59479	2.09185	-0.616456	-0.35254
	well-fed	96	1	-1.20478	2.17987	2.03379	-0.305523	-0.296925
	well-fed	97	1	-1.18999	2.40427	2.0288	-0.396228	-0.378524
	well-fed	98	1	-1.25179	2.57454	2.69278	-0.486115	-0.402538
	well-fed	99	1	-1.13336	2.53433	2.54774	-0.0857489	-0.624421
	well-fed	100	1	-1.30339	2.35206	2.33411	-0.250809	-0.370353
	well-fed	1	2	-1.47069	2.44773	3.29556	-0.0900042	-0.518832
	well-fed	2	2	-1.36653	2.4122	2.98034	-0.159141	-0.452115
	well-fed	3	2	-1.40151	2.4419	3.20244	-0.0222143	-0.560009
	well-fed	4	2	-1.47171	2.42582	3.09976	0.0418773	-0.541663
	well-fed	5	2	-1.26656	2.15274	3.10208	-0.0586056	-0.534995
	well-fed	6	2	-1.70537	2.47183	2.88167	-0.168554	-0.281271
	well-fed	7	2	-1.24823	2.37929	2.75077	-0.218464	-0.485571
	well-fed	8	2	-1.91605	2.67208	3.46124	0.00789977	-0.474515
	well-fed	9	2	-1.19565	2.35994	2.69779	-0.100914	-0.492129
	well-fed	10	2	-1.48451	2.37991	2.94912	-0.120005	-0.39326
	well-fed	11	2	-1.46298	2.23793	3.60816	0.0293071	-0.526633
	well-fed	12	2	-1.53241	2.25448	2.60138	-0.166533	-0.27268
	well-fed	13	2	-1.47584	2.37674	3.3279	0.0198249	-0.547659
	well-fed	14	2	-1.39546	2.26813	3.07779	-0.0812197	-0.450622
	well-fed	15	2	-1.32028	2.14585	3.11192	0.092313	-0.54607
	well-fed	16	2	-1.41891	2.45372	2.92319	-0.21336	-0.390371
	well-fed	17	2	-1.49185	2.45569	3.14131	-0.0834881	-0.476436
	well-fed	18	2	-1.45039	2.46512	2.96358	-0.204789	-0.448625
	well-fed	19	2	-1.53444	2.36717	2.5053	-0.20044	-0.263158
	well-fed	20	2	-1.32908	2.10931	2.96964	0.0536449	-0.513371
	well-fed	21	2	-1.42131	2.48224	2.9979	-0.212679	-0.454893
	well-fed	22	2	-1.37478	2.34372	2.96139	-0.143937	-0.45864
	well-fed	23	2	-1.47427	2.50545	3.09398	-0.146723	-0.473964
	well-fed	24	2	-1.45169	2.35904	3.23971	-0.103771	-0.434719
	well-fed	25	2	-1.4003	2.19344	3.20196	-0.0328128	-0.500441
	well-fed	26	2	-1.42331	2.23653	2.99142	-0.0493338	-0.448296
	well-fed	27	2	-1.47888	2.42151	3.00947	-0.211029	-0.390567
	well-fed	28	2	-1.38898	2.43583	3.08826	-0.121618	-0.502711
	well-fed	29	2	-1.40487	2.26557	3.22697	-0.0430661	-0.486273
	well-fed	30	2	-1.62641	2.47707	2.73061	-0.147572	-0.28371
	well-fed	31	2	-1.53662	2.54068	3.02511	-0.204223	-0.413696
	well-fed	32	2	-1.39038	2.44719	2.89027	-0.165402	-0.450173
	well-fed	33	2	-1.43653	2.25711	2.91094	-0.0382376	-0.421834
	well-fed	34	2	-1.22278	2.06445	2.94505	0.0340809	-0.574425
	well-fed	35	2	-1.38713	2.3765	2.69597	-0.0744013	-0.488397
	well-fed	36	2	-1.63457	2.31945	2.92023	-0.0777962	-0.331758
	well-fed	37	2	-1.4874	2.33087	2.88831	-0.0132821	-0.485238
	well-fed	38	2	-1.47841	2.24362	3.03063	-0.0833885	-0.436148
	well-fed	39	2	-1.38945	2.18238	3.27015	0.0995237	-0.563617
	well-fed	40	2	-1.39725	2.22897	3.01962	-0.0144029	-0.489012
	well-fed	41	2	-1.46964	2.25821	3.02672	-0.0777364	-0.437201
	well-fed	42	2	-1.64838	2.33582	2.93354	-0.0927587	-0.311977
	well-fed	43	2	-1.37241	2.28259	3.26358	-0.0277695	-0.510039
	well-fed	44	2	-1.35518	2.14742	3.29878	0.0820228	-0.560099
	well-fed	45	2	-1.30038	2.32641	2.82925	-0.223841	-0.453398
	well-fed	46	2	-1.4227	2.54018	3.07321	-0.221936	-0.443957
	well-fed	47	2	-1.60786	2.55579	3.34336	0.0542553	-0.542442
	well-fed	48	2	-1.73027	2.73179	3.25762	-0.182229	-0.39468
	well-fed	49	2	-1.3973	2.45953	2.63847	-0.247951	-0.36603
	well-fed	50	2	-1.42434	2.19335	3.02838	0.0539527	-0.471262
	well-fed	51	2	-1.24114	2.11201	2.98614	0.0384953	-0.536948
	well-fed	52	2	-1.52995	2.30896	3.33054	-0.0348801	-0.485034
	well-fed	53	2	-1.41713	2.18964	2.84818	0.0126618	-0.429789
	well-fed	54	2	-1.38106	2.43067	2.94947	-0.162616	-0.48046
	well-fed	55	2	-1.4185	2.21317	3.06945	0.125182	-0.508872
	well-fed	56	2	-1.77089	2.71329	3.45389	-0.176071	-0.41529
	well-fed	57	2	-1.26794	2.47528	2.7891	-0.188877	-0.525628
	well-fed	58	2	-1.48792	2.44613	3.15408	-0.115255	-0.42788
	well-fed	59	2	-1.52359	2.34107	2.91656	0.0113175	-0.402358
	well-fed	60	2	-1.34267	2.17438	2.8152	-0.0694184	-0.471719
	well-fed	61	2	-1.59721	2.60836	3.40931	-0.139168	-0.427727
	well-fed	62	2	-1.36264	2.41919	2.83743	-0.24282	-0.437531
	well-fed	63	2	-1.39637	2.25143	3.10724	-0.0380791	-0.484152
	well-fed	64	2	-1.45776	2.22217	2.54696	-0.0320255	-0.354558
	well-fed	65	2	-1.57866	2.46835	2.73181	-0.176488	-0.270472
	well-fed	66	2	-1.47829	2.49238	2.71121	-0.123252	-0.381528
	well-fed	67	2	-1.39583	2.30392	3.14686	0.061311	-0.585608
	well-fed	68	2	-1.37937	2.40599	2.9067	-0.0559705	-0.447645
	well-fed	69	2	-1.65545	2.49421	3.32203	-0.127979	-0.376067
	well-fed	70	2	-1.51826	2.36762	3.1265	-0.109215	-0.468302
	well-fed	71	2	-1.41877	2.3982	3.00571	-0.165616	-0.461119
	well-fed	72	2	-1.50096	2.4635	2.93965	-0.14256	-0.41124
	well-fed	73	2	-1.59527	2.29388	2.80556	-0.0823492	-0.313528
	well-fed	74	2	-1.5088	2.35144	2.94157	-0.210281	-0.306032
	well-fed	75	2	-1.25577	2.31288	2.83577	-0.0458072	-0.522196
	well-fed	76	2	-1.40647	2.2229	3.02823	0.104383	-0.54989
	well-fed	77	2	-1.23567	2.11543	2.66955	0.0333632	-0.518832
	well-fed	78	2	-1.40834	2.13169	2.92864	0.00194302	-0.477861
	well-fed	79	2	-1.40548	2.27649	3.06483	-0.045933	-0.486499
	well-fed	80	2	-1.49633	2.41856	3.17343	-0.00485478	-0.473673
	well-fed	81	2	-1.42006	2.35069	3.20131	-0.00569875	-0.545954
	well-fed	82	2	-1.46431	2.43714	3.31662	-0.11982	-0.457176
	well-fed	83	2	-1.39242	2.31831	2.52323	-0.0419085	-0.394213
	well-fed	84	2	-1.50533	2.35775	3.58446	0.013418	-0.578598
	well-fed	85	2	-1.41909	2.23484	3.20634	-0.0677061	-0.473966
	well-fed	86	2	-1.42036	2.34913	2.89528	-0.105532	-0.426465
	well-fed	87	2	-1.27631	2.31607	2.76492	-0.19224	-0.436124
	well-fed	88	2	-1.49051	2.48616	3.21659	-0.093203	-0.485098
	well-fed	89	2	-1.3108	2.34961	3.14013	-0.0677782	-0.530204
	well-fed	90	2	-1.46701	2.37916	2.76446	-0.0499374	-0.492415
	well-fed	91	2	-1.51422	2.35416	3.1508	-0.021387	-0.495058
	well-fed	92	2	-1.39901	2.37899	3.09292	-0.154101	-0.468964
	well-fed	93	2	-1.52612	2.3652	3.32406	0.0309461	-0.523603
	well-fed	94	2	-1.6217	2.23857	3.77347	0.239484	-0.577722
	well-fed	95	2	-1.42587	2.27697	3.13028	-0.0712305	-0.504815
	well-fed	96	2	-1.51654	2.19991	3.0893	0.0780624	-0.462038
	well-fed	97	2	-1.39974	2.33334	3.03995	-0.0373579	-0.522388
	well-fed	98	2	-1.31451	2.27216	2.9985	-0.106353	-0.482431
	well-fed	99	2	-1.52405	2.46556	3.02624	0.0236792	-0.496748
	well-fed	100	2	-1.54723	2.30386	3.02008	-0.0264095	-0.413879
	well-fed	1	3	-1.16757	1.7702	2.21709	-0.247375	-0.245996
	well-fed	2	3	-0.998695	1.75223	1.84489	-0.333719	-0.230773
	well-fed	3	3	-1.12833	1.74606	2.01934	-0.258944	-0.20832
	well-fed	4	3	-0.985999	1.52856	2.12978	0.0203333	-0.434934
	well-fed	5	3	-1.03065	1.64302	2.55714	-0.250869	-0.319868
	well-fed	6	3	-1.22067	1.68546	2.03847	-0.188147	-0.198257
	well-fed	7	3	-0.884835	1.64436	2.07836	-0.239108	-0.368061
	well-fed	8	3	-1.11676	1.75377	2.17838	-0.174523	-0.312866
	well-fed	9	3	-0.87042	1.56287	1.03821	-0.300226	-0.130037
	well-fed	10	3	-1.1445	1.73437	2.63496	-0.182422	-0.303977
	well-fed	11	3	-0.96773	1.70939	2.28775	-0.100423	-0.409157
	well-fed	12	3	-1.09806	1.64758	1.9592	-0.304642	-0.14673
	well-fed	13	3	-1.03015	1.59382	2.58844	-0.058455	-0.438393
	well-fed	14	3	-0.968894	1.78765	2.12575	-0.314968	-0.291948
	well-fed	15	3	-0.877145	1.51736	1.71958	-0.15873	-0.303003
	well-fed	16	3	-1.07884	1.69579	1.99677	-0.333091	-0.201926
	well-fed	17	3	-1.2292	1.80259	2.16651	-0.21957	-0.211586
	well-fed	18	3	-0.727404	1.51679	1.76367	-0.189286	-0.428208
	well-fed	19	3	-1.17231	1.736	2.0646	-0.272802	-0.153463
	well-fed	20	3	-0.940994	1.52931	2.20877	-0.080766	-0.379899
	well-fed	21	3	-1.00018	1.73384	2.21125	-0.268388	-0.318926
	well-fed	22	3	-0.973662	1.63964	2.35874	-0.132246	-0.379933
	well-fed	23	3	-0.924019	1.54118	1.82865	-0.144485	-0.329215
	well-fed	24	3	-1.02438	1.83416	2.23733	-0.253859	-0.3395
	well-fed	25	3	-1.16546	1.78924	2.13995	-0.333068	-0.174603
	well-fed	26	3	-1.01377	1.70632	2.15495	-0.29195	-0.266234
	well-fed	27	3	-0.990193	1.7053	2.36426	-0.234144	-0.347573
	well-fed	28	3	-0.967587	1.63913	2.18005	-0.186994	-0.354727
	well-fed	29	3	-1.10081	1.68394	2.26691	-0.175048	-0.292149
	well-fed	30	3	-1.27883	1.7908	2.1099	-0.344924	-0.0774385
	well-fed	31	3	-1.19309	1.87458	2.64191	-0.21286	-0.306565
	well-fed	32	3	-0.982735	1.67379	2.11569	-0.22994	-0.296347
	well-fed	33	3	-1.00708	1.66758	2.19897	-0.161326	-0.332072
	well-fed	34	3	-0.811622	1.55647	1.62324	-0.17629	-0.35398
	well-fed	35	3	-1.14643	1.75813	1.56194	-0.326864	-0.11517
	well-fed	36	3	-1.02035	1.71855	1.73107	-0.303439	-0.197523
	well-fed	37	3	-1.18719	1.72249	2.14794	-0.194752	-0.269071
	well-fed	38	3	-1.17921	1.74345	2.13126	-0.235287	-0.17818
	well-fed	39	3	-1.17089	1.82821	2.29128	-0.173009	-0.277072
	well-fed	40	3	-0.913512	1.56771	2.19533	-0.163984	-0.365242
	well-fed	41	3	-1.0099	1.73088	2.53254	-0.250677	-0.342352
	well-fed	42	3	-1.37114	1.78131	2.33341	-0.196479	-0.150212
	well-fed	43	3	-0.96823	1.63236	2.15066	-0.190158	-0.329507
	well-fed	44	3	-1.22245	1.71221	2.32208	-0.106699	-0.240807
	well-fed	45	3	-1.02968	1.58027	1.97683	-0.245085	-0.224958
	well-fed	46	3	-1.07586	1.72782	2.48662	-0.134604	-0.390983
	well-fed	47	3	-0.852501	1.588	2.12469	0.0266598	-0.509075
	well-fed	48	3	-1.17839	1.83512	2.1452	-0.249512	-0.231651
	well-fed	49	3	-0.774519	1.62997	2.01279	-0.257595	-0.37299
	well-fed	50	3	-1.19848	1.68608	1.91838	-0.274147	-0.132096
	well-fed	51	3	-0.820249	1.60185	1.68401	-0.307437	-0.268064
	well-fed	52	3	-1.33204	1.85133	2.25632	-0.292629	-0.121569
	well-fed	53	3	-0.963017	1.6227	2.43486	-0.179296	-0.327445
	well-fed	54	3	-0.882168	1.60924	2.20449	-0.127113	-0.410491
	well-fed	55	3	-0.860455	1.57077	2.0196	-0.056931	-0.426737
	well-fed	56	3	-1.03086	1.58332	1.99756	-0.290877	-0.16672
	well-fed	57	3	-0.720328	1.60212	1.9434	-0.12701	-0.489706
	well-fed	58	3	-1.05528	1.73266	2.44139	-0.248028	-0.298066
	well-fed	59	3	-1.06667	1.65801	2.03589	-0.236719	-0.217067
	well-fed	60	3	-1.09487	1.74453	1.98372	-0.227189	-0.245283
	well-fed	61	3	-1.29788	1.8623	2.44049	-0.162931	-0.252872
	well-fed	62	3	-0.893265	1.65745	1.57221	-0.248076	-0.285501
	well-fed	63	3	-0.954365	1.69271	2.23258	-0.137851	-0.410799
	well-fed	64	3	-1.01171	1.63008	2.068	-0.130853	-0.321491
	well-fed	65	3	-0.936106	1.63214	1.60911	-0.232762	-0.237237
	well-fed	66	3	-0.964814	1.71943	2.53184	-0.130187	-0.425543
	well-fed	67	3	-1.06533	1.80818	2.38961	-0.194835	-0.342048
	well-fed	68	3	-1.05485	1.67689	2.50889	-0.121165	-0.35639
	well-fed	69	3	-1.0327	1.77252	2.55149	-0.247641	-0.356417
	well-fed	70	3	-1.14997	1.6629	1.9042	-0.265282	-0.186229
	well-fed	71	3	-1.04932	1.67922	2.28571	-0.219061	-0.291916
	well-fed	72	3	-0.977981	1.58796	1.67783	-0.138922	-0.262079
	well-fed	73	3	-1.2402	1.60973	1.91186	-0.187463	-0.131226
	well-fed	74	3	-1.15398	1.70018	1.95582	-0.295749	-0.11604
	well-fed	75	3	-0.764736	1.61338	2.05657	-0.127846	-0.471232
	well-fed	76	3	-1.18307	1.81346	1.87783	-0.32822	-0.12223
	well-fed	77	3	-0.831783	1.47154	1.91058	0.00328055	-0.450775
	well-fed	78	3	-1.18973	1.7337	2.16288	-0.300313	-0.146069
	well-fed	79	3	-1.16991	1.96515	2.4219	-0.338207	-0.274452
	well-fed	80	3	-1.20717	1.83378	2.72256	-0.224597	-0.250425
	well-fed	81	3	-0.896316	1.63349	2.17062	-0.140324	-0.404626
	well-fed	82	3	-0.923647	1.71457	2.05142	-0.258141	-0.322004
	well-fed	83	3	-0.982343	1.65825	2.32145	-0.119085	-0.356483
	well-fed	84	3	-1.1245	1.91854	2.66669	-0.189108	-0.422136
	well-fed	85	3	-1.01386	1.67214	1.58867	-0.271776	-0.171537
	well-fed	86	3	-1.22247	1.86389	2.42908	-0.272311	-0.222727
	well-fed	87	3	-1.0068	1.70159	1.96235	-0.339224	-0.21458
	well-fed	88	3	-1.12265	1.74325	1.73105	-0.260269	-0.139403
	well-fed	89	3	-1.05231	1.66805	1.94258	-0.211278	-0.242713
	well-fed	90	3	-0.853784	1.51461	1.91776	-0.186634	-0.353991
	well-fed	91	3	-1.04722	1.74368	2.48432	-0.14135	-0.396127
	well-fed	92	3	-0.94238	1.66946	1.77648	-0.211649	-0.306277
	well-fed	93	3	-0.942304	1.54525	2.18954	-0.11566	-0.375236
	well-fed	94	3	-0.856398	1.48395	2.21746	0.0281346	-0.523991
	well-fed	95	3	-0.93423	1.61075	1.66802	-0.167924	-0.314475
	well-fed	96	3	-1.13638	1.48615	1.79467	-0.253138	-0.116909
	well-fed	97	3	-1.03316	1.71835	2.51878	-0.151954	-0.380616
	well-fed	98	3	-1.05791	1.65771	2.38777	-0.105107	-0.340375
	well-fed	99	3	-1.05828	1.86188	2.54777	-0.116497	-0.438742
	well-fed	100	3	-1.08713	1.7702	2.52701	-0.0632577	-0.403996
	well-fed	1	4	-1.33297	2.08564	2.33735	-0.0656802	-0.49618
	well-fed	2	4	-1.10067	2.15612	1.97841	-0.385569	-0.41723
	well-fed	3	4	-1.27253	2.35985	2.03873	-0.440352	-0.358462
	well-fed	4	4	-1.1633	2.05438	2.23503	-0.032798	-0.588686
	well-fed	5	4	-1.08766	2.00441	2.44425	-0.26062	-0.521345
	well-fed	6	4	-1.32651	2.20562	2.05345	-0.218948	-0.391728
	well-fed	7	4	-1.13024	2.25251	2.20037	-0.392819	-0.465134
	well-fed	8	4	-1.36036	2.33446	2.77298	-0.171142	-0.602211
	well-fed	9	4	-0.954965	2.19716	0.951477	-0.464125	-0.333073
	well-fed	10	4	-1.22799	2.31979	2.14553	-0.471011	-0.361075
	well-fed	11	4	-1.07014	2.17636	2.21343	-0.30688	-0.532623
	well-fed	12	4	-1.28607	2.14839	2.14387	-0.278544	-0.365893
	well-fed	13	4	-1.24522	2.12929	2.91709	-0.149105	-0.607281
	well-fed	14	4	-1.04452	2.2143	2.35695	-0.338342	-0.517201
	well-fed	15	4	-1.19327	2.04221	2.10736	-0.224316	-0.428983
	well-fed	16	4	-0.956966	1.91639	2.26837	-0.107052	-0.573537
	well-fed	17	4	-1.30245	2.17871	2.1292	-0.222222	-0.426674
	well-fed	18	4	-1.26868	2.47932	2.17663	-0.466813	-0.405469
	well-fed	19	4	-1.4245	2.29941	2.0327	-0.383253	-0.245456
	well-fed	20	4	-1.3194	2.00781	2.17041	-0.226256	-0.366995
	well-fed	21	4	-1.1347	2.22927	2.42614	-0.303188	-0.549363
	well-fed	22	4	-1.02599	2.00313	2.33695	-0.128876	-0.581361
	well-fed	23	4	-1.22262	2.2132	2.48931	-0.255939	-0.50373
	well-fed	24	4	-1.26188	2.2638	2.50393	-0.252189	-0.504105
	well-fed	25	4	-1.20673	2.01296	2.1938	-0.227363	-0.432103
	well-fed	26	4	-1.12634	2.07675	2.34051	-0.200734	-0.516041
	well-fed	27	4	-1.17145	2.05799	2.33546	-0.215552	-0.47273
	well-fed	28	4	-1.36109	2.12206	2.56424	-0.127344	-0.475816
	well-fed	29	4	-1.26387	2.02258	2.30332	-0.11085	-0.457944
	well-fed	30	4	-1.41473	2.14714	2.11062	-0.305968	-0.262319
	well-fed	31	4	-1.29059	2.29344	2.49093	-0.238809	-0.476917
	well-fed	32	4	-1.18342	2.15462	1.80373	-0.404142	-0.316036
	well-fed	33	4	-1.06945	2.0729	2.20475	-0.228633	-0.504866
	well-fed	34	4	-1.22548	2.11835	2.0543	-0.326979	-0.416018
	well-fed	35	4	-1.27853	2.10888	1.84874	-0.237308	-0.372704
	well-fed	36	4	-1.33469	2.10644	2.25776	-0.125189	-0.4381
	well-fed	37	4	-1.29035	2.23263	1.92027	-0.254778	-0.419609
	well-fed	38	4	-1.20313	2.11662	2.13091	-0.2637	-0.446629
	well-fed	39	4	-1.23105	2.11163	2.41719	-0.150786	-0.522735
	well-fed	40	4	-1.14635	2.27622	2.36096	-0.383111	-0.476324
	well-fed	41	4	-1.01488	1.99371	2.59468	-0.165881	-0.623386
	well-fed	42	4	-1.27775	2.14759	1.65517	-0.301307	-0.340274
	well-fed	43	4	-1.18046	2.13824	2.49831	-0.220567	-0.511525
	well-fed	44	4	-1.24358	2.05318	2.62626	-0.107293	-0.549566
	well-fed	45	4	-1.12442	2.03132	2.22289	-0.29649	-0.446416
	well-fed	46	4	-1.1975	2.39508	2.15666	-0.48806	-0.421121
	well-fed	47	4	-1.33393	2.45234	2.38037	-0.233947	-0.515694
	well-fed	48	4	-1.44857	2.4267	2.04861	-0.425501	-0.294059
	well-fed	49	4	-1.10106	2.08962	2.11073	-0.203827	-0.474501
	well-fed	50	4	-1.22965	2.05984	1.89985	-0.176135	-0.363797
	well-fed	51	4	-1.05444	2.03671	1.70846	-0.402007	-0.338098
	well-fed	52	4	-1.28679	2.02925	2.6197	-0.0177025	-0.570574
	well-fed	53	4	-0.8846	2.0532	2.26248	-0.193218	-0.641025
	well-fed	54	4	-1.27781	2.33922	2.27154	-0.392759	-0.397069
	well-fed	55	4	-1.09851	2.21798	2.00899	-0.268973	-0.464384
	well-fed	56	4	-1.2893	2.11128	2.15592	-0.26251	-0.363196
	well-fed	57	4	-1.02286	2.12137	2.56777	-0.117802	-0.653421
	well-fed	58	4	-1.19399	2.28212	2.14552	-0.366747	-0.381263
	well-fed	59	4	-1.20571	2.15963	2.08951	-0.260674	-0.422688
	well-fed	60	4	-1.03278	2.02338	1.72198	-0.333677	-0.436153
	well-fed	61	4	-1.31894	2.26306	2.13017	-0.209374	-0.408411
	well-fed	62	4	-1.18699	2.18553	2.10562	-0.362444	-0.407864
	well-fed	63	4	-1.14822	2.25928	2.33778	-0.243885	-0.554949
	well-fed	64	4	-1.11759	2.03918	2.14419	-0.155119	-0.490834
	well-fed	65	4	-1.25784	2.34016	2.03374	-0.380663	-0.367059
	well-fed	66	4	-1.03995	2.19362	2.26245	-0.223725	-0.570867
	well-fed	67	4	-1.14622	2.17061	2.34985	-0.175384	-0.57063
	well-fed	68	4	-1.08185	2.01442	2.48999	-0.148284	-0.535401
	well-fed	69	4	-1.08814	2.25636	2.46379	-0.335023	-0.557484
	well-fed	70	4	-1.30536	2.09416	2.00449	-0.315731	-0.361647
	well-fed	71	4	-1.09542	2.11672	2.38597	-0.286293	-0.52341
	well-fed	72	4	-1.32861	2.14753	1.87859	-0.307559	-0.312784
	well-fed	73	4	-1.3625	2.21707	1.85798	-0.470268	-0.221994
	well-fed	74	4	-1.30588	2.25967	1.95944	-0.476257	-0.25349
	well-fed	75	4	-1.01115	2.14242	2.16338	-0.249234	-0.545346
	well-fed	76	4	-1.34957	2.09895	1.87214	-0.207497	-0.310587
	well-fed	77	4	-1.07726	2.04528	2.10607	-0.134132	-0.546391
	well-fed	78	4	-1.24075	1.98234	1.56957	-0.291198	-0.283197
	well-fed	79	4	-1.26585	2.35435	2.28016	-0.404132	-0.428547
	well-fed	80	4	-1.26649	2.17796	2.36529	-0.171787	-0.453037
	well-fed	81	4	-1.10664	2.30676	2.48811	-0.326453	-0.576527
	well-fed	82	4	-1.21532	2.38845	2.08008	-0.449858	-0.389808
	well-fed	83	4	-1.14314	2.08081	1.87278	-0.221907	-0.396571
	well-fed	84	4	-1.27062	2.35365	2.97666	-0.174373	-0.640281
	well-fed	85	4	-1.43171	2.12415	2.08011	-0.29504	-0.258147
	well-fed	86	4	-1.31058	2.11662	1.92283	-0.313122	-0.292642
	well-fed	87	4	-1.12905	2.12951	2.05261	-0.3186	-0.415336
	well-fed	88	4	-1.24126	2.0404	1.95816	-0.20387	-0.405964
	well-fed	89	4	-1.29158	2.07035	2.30394	-0.142059	-0.452374
	well-fed	90	4	-1.18386	1.99326	2.27166	-0.200302	-0.462537
	well-fed	91	4	-1.17688	2.23167	2.28431	-0.283351	-0.520054
	well-fed	92	4	-1.2872	2.05903	2.23854	-0.167702	-0.408632
	well-fed	93	4	-1.23934	2.33975	2.69435	-0.305665	-0.536502
	well-fed	94	4	-1.23131	2.10163	2.53815	-0.161901	-0.550989
	well-fed	95	4	-1.20513	2.11786	1.97304	-0.226597	-0.451759
	well-fed	96	4	-1.25589	1.83967	1.98444	-0.0939284	-0.37216
	well-fed	97	4	-1.09425	2.11415	2.0844	-0.254843	-0.525776
	well-fed	98	4	-1.22587	2.17408	2.45433	-0.270465	-0.463355
	well-fed	99	4	-1.21206	2.28256	2.27568	-0.219898	-0.537479
	well-fed	100	4	-1.21669	2.34225	2.33076	-0.297628	-0.496822
	well-fed	1	5	-1.35405	2.32237	2.75761	0.0393259	-0.642519
	well-fed	2	5	-1.1763	2.01883	2.55618	0.0406191	-0.584754
	well-fed	3	5	-1.25727	2.16388	2.51364	0.140583	-0.646557
	well-fed	4	5	-1.17775	2.24583	3.12876	0.34329	-0.918519
	well-fed	5	5	-1.24155	1.97595	2.76892	0.0784347	-0.587492
	well-fed	6	5	-1.47209	2.36989	2.67311	-0.0484075	-0.526798
	well-fed	7	5	-1.01012	2.01374	2.82118	0.152007	-0.793783
	well-fed	8	5	-1.3735	2.50297	3.11368	0.111826	-0.765885
	well-fed	9	5	-1.2057	2.07471	1.819	0.034787	-0.489106
	well-fed	10	5	-1.23283	2.33448	3.02291	0.0620771	-0.672335
	well-fed	11	5	-0.960034	2.2395	3.01519	0.183089	-0.892609
	well-fed	12	5	-1.38547	2.1193	2.36363	-0.0176314	-0.41922
	well-fed	13	5	-1.2284	2.29903	3.46623	0.282841	-0.905014
	well-fed	14	5	-0.888289	2.13981	2.79309	0.0339612	-0.761954
	well-fed	15	5	-1.12538	2.09887	2.60001	0.196438	-0.718976
	well-fed	16	5	-1.10268	2.21458	3.12659	0.0627728	-0.751475
	well-fed	17	5	-1.38796	2.51013	2.90937	0.0724935	-0.668686
	well-fed	18	5	-1.02686	2.10318	2.97306	0.142721	-0.814415
	well-fed	19	5	-1.27555	2.23745	2.72703	0.0770643	-0.6278
	well-fed	20	5	-1.11481	1.90741	2.59448	0.14051	-0.655016
	well-fed	21	5	-1.13323	2.30595	2.96807	0.119892	-0.796559
	well-fed	22	5	-0.948858	2.2353	2.86345	0.110534	-0.82385
	well-fed	23	5	-1.2831	2.29433	3.04372	0.0934696	-0.741424
	well-fed	24	5	-1.16165	2.26823	3.19044	0.138453	-0.800492
	well-fed	25	5	-1.11698	2.2078	2.81069	0.0781013	-0.712798
	well-fed	26	5	-1.16909	2.07289	2.85029	0.10584	-0.66092
	well-fed	27	5	-1.08702	2.16728	2.85132	0.0299107	-0.694712
	well-fed	28	5	-1.21494	2.20315	3.08017	0.150397	-0.75792
	well-fed	29	5	-1.1961	2.08508	2.95131	0.158498	-0.72873
	well-fed	30	5	-1.6366	2.3602	2.77506	-0.0666669	-0.366475
	well-fed	31	5	-1.43572	2.34068	2.99551	0.0137544	-0.587137
	well-fed	32	5	-1.13366	2.30606	2.74373	0.052884	-0.720588
	well-fed	33	5	-0.99455	2.34622	2.87566	0.0911092	-0.800423
	well-fed	34	5	-1.05694	2.13505	2.4447	0.177357	-0.749292
	well-fed	35	5	-1.26779	2.31167	2.45698	0.0779721	-0.663983
	well-fed	36	5	-1.32017	2.44534	2.56311	0.0150381	-0.635747
	well-fed	37	5	-1.35077	2.27414	2.6878	0.211913	-0.719362
	well-fed	38	5	-1.26649	2.31976	2.69802	0.130508	-0.689484
	well-fed	39	5	-1.11621	2.19059	2.44738	0.10145	-0.666859
	well-fed	40	5	-0.92791	2.03309	3.219	0.239806	-0.904995
	well-fed	41	5	-1.05818	2.30602	3.06929	0.0506571	-0.781813
	well-fed	42	5	-1.40664	2.24892	2.60389	0.0593124	-0.567767
	well-fed	43	5	-0.936349	1.94296	3.13727	0.249915	-0.879222
	well-fed	44	5	-1.20656	2.13282	2.9416	0.206237	-0.722626
	well-fed	45	5	-1.28642	2.20587	2.87854	0.0560214	-0.600727
	well-fed	46	5	-1.2392	1.9773	3.10939	0.176562	-0.715266
	well-fed	47	5	-1.10349	2.06298	2.67731	0.228836	-0.763172
	well-fed	48	5	-1.32243	2.17171	2.35833	0.0297319	-0.509986
	well-fed	49	5	-0.928981	2.25978	2.84303	0.0072913	-0.786717
	well-fed	50	5	-1.24787	2.2561	2.57661	-0.0280037	-0.566993
	well-fed	51	5	-1.09217	1.96158	2.22996	-0.00189911	-0.547434
	well-fed	52	5	-1.3249	2.30066	2.80064	0.0507751	-0.641338
	well-fed	53	5	-1.10611	2.04854	2.93639	0.223762	-0.764449
	well-fed	54	5	-0.996432	2.28494	3.14111	0.0850827	-0.847912
	well-fed	55	5	-0.980327	2.17245	2.84321	0.126028	-0.837292
	well-fed	56	5	-1.20908	2.20489	2.88271	0.148837	-0.719554
	well-fed	57	5	-1.03549	2.39226	3.02198	0.186168	-0.904787
	well-fed	58	5	-1.11146	2.05178	2.51032	0.00101988	-0.58393
	well-fed	59	5	-1.17043	2.19255	2.77161	0.172034	-0.741849
	well-fed	60	5	-1.2274	2.29949	2.9122	0.103279	-0.728696
	well-fed	61	5	-1.26615	2.37314	2.46073	-0.00939443	-0.578958
	well-fed	62	5	-1.23299	2.34229	2.54956	-0.0119013	-0.648886
	well-fed	63	5	-0.912613	2.13609	2.70643	0.147002	-0.831481
	well-fed	64	5	-1.12935	2.1482	3.01798	0.189832	-0.779524
	well-fed	65	5	-1.21707	2.20673	2.46513	0.172001	-0.658402
	well-fed	66	5	-0.978105	2.13944	3.27726	0.198839	-0.89549
	well-fed	67	5	-1.2862	2.46245	2.99089	0.176581	-0.780762
	well-fed	68	5	-0.948841	2.0463	3.32956	0.226253	-0.884153
	well-fed	69	5	-1.0408	2.04504	3.0912	0.204363	-0.833271
	well-fed	70	5	-1.39694	2.36951	2.7677	0.0728964	-0.642241
	well-fed	71	5	-1.16592	2.23224	3.10438	0.126582	-0.775983
	well-fed	72	5	-1.25825	2.2653	2.56556	0.0955184	-0.680557
	well-fed	73	5	-1.17172	1.99826	2.5543	0.148003	-0.634567
	well-fed	74	5	-1.39973	2.19737	2.66402	0.0630274	-0.516445
	well-fed	75	5	-0.86372	2.15899	3.12037	0.233541	-0.956735
	well-fed	76	5	-1.42445	2.34143	2.36137	0.00121967	-0.485935
	well-fed	77	5	-0.939247	2.07785	2.56736	0.250458	-0.832455
	well-fed	78	5	-1.50117	2.23872	2.64005	-0.083855	-0.424235
	well-fed	79	5	-1.15721	2.16417	2.78112	0.133128	-0.700583
	well-fed	80	5	-1.38253	2.12523	2.9233	0.0940911	-0.59058
	well-fed	81	5	-1.15731	2.25589	3.27227	0.246331	-0.881346
	well-fed	82	5	-0.977579	2.27183	2.9555	0.110129	-0.825158
	well-fed	83	5	-1.17642	2.15039	2.65459	0.101007	-0.617454
	well-fed	84	5	-1.19353	2.41357	3.3414	0.186724	-0.898873
	well-fed	85	5	-1.49354	2.1978	2.56795	0.0429707	-0.432767
	well-fed	86	5	-1.44041	2.26296	2.43018	-0.0663923	-0.426121
	well-fed	87	5	-1.21738	2.22426	2.72268	-0.00707394	-0.587491
	well-fed	88	5	-1.33165	2.30753	2.21799	-0.00602016	-0.519785
	well-fed	89	5	-1.26251	2.21615	3.00282	0.125984	-0.69784
	well-fed	90	5	-1.13906	2.17955	3.16355	0.305729	-0.939864
	well-fed	91	5	-1.21217	2.36567	2.78717	0.15008	-0.75856
	well-fed	92	5	-1.29225	2.13793	2.5814	0.00420046	-0.549316
	well-fed	93	5	-1.36663	2.22054	3.00608	0.168985	-0.671593
	well-fed	94	5	-1.30582	2.33678	3.36328	0.288848	-0.885152
	well-fed	95	5	-1.2671	2.27795	2.62586	0.120317	-0.701139
	well-fed	96	5	-1.43592	2.1061	2.65959	0.054968	-0.531045
	well-fed	97	5	-1.12267	2.3971	2.96868	0.115189	-0.80665
	well-fed	98	5	-1.18407	2.16332	3.17272	0.165507	-0.747233
	well-fed	99	5	-1.21041	2.32616	3.17958	0.278371	-0.899598
	well-fed	100	5	-1.22042	2.14055	2.51835	0.13888	-0.620884
	well-fed	1	6	-0.911353	2.09515	3.44841	-0.202168	-0.614644
	well-fed	2	6	-0.616971	1.95955	3.07189	-0.449861	-0.498709
	well-fed	3	6	-0.73776	2.12041	3.18355	-0.312387	-0.596653
	well-fed	4	6	-0.808976	1.96569	3.1182	-0.141066	-0.638634
	well-fed	5	6	-0.50639	1.80182	3.1871	-0.470287	-0.560261
	well-fed	6	6	-0.900089	2.03734	2.98024	-0.248602	-0.509293
	well-fed	7	6	-0.632297	2.03772	2.97688	-0.443238	-0.578478
	well-fed	8	6	-0.82018	2.24027	3.34449	-0.333219	-0.64927
	well-fed	9	6	-0.389148	1.9322	2.87648	-0.328341	-0.665024
	well-fed	10	6	-0.705628	2.0921	3.32332	-0.367958	-0.585189
	well-fed	11	6	-0.837717	2.26216	3.36525	-0.280577	-0.618352
	well-fed	12	6	-0.681974	1.81634	2.60693	-0.253842	-0.490844
	well-fed	13	6	-0.972162	2.09483	3.39727	-0.140117	-0.623425
	well-fed	14	6	-0.625939	2.1544	2.8951	-0.545735	-0.499605
	well-fed	15	6	-0.464898	1.83479	3.01346	-0.14656	-0.70375
	well-fed	16	6	-0.593646	1.94724	3.50742	-0.300546	-0.654717
	well-fed	17	6	-0.871778	2.25223	3.53475	-0.147246	-0.695025
	well-fed	18	6	-0.582767	1.93929	2.88862	-0.41853	-0.588459
	well-fed	19	6	-0.980769	2.22146	2.84153	-0.361437	-0.387327
	well-fed	20	6	-0.527404	1.72307	3.23106	-0.110044	-0.728301
	well-fed	21	6	-0.798657	2.19421	3.31312	-0.468673	-0.546502
	well-fed	22	6	-0.68669	2.21385	2.86248	-0.482496	-0.532125
	well-fed	23	6	-0.781742	2.03621	3.11734	-0.252561	-0.610447
	well-fed	24	6	-0.664634	2.18478	3.3124	-0.380445	-0.614246
	well-fed	25	6	-0.734248	1.9883	3.26793	-0.26733	-0.588398
	well-fed	26	6	-0.783381	2.0355	3.19188	-0.312701	-0.541786
	well-fed	27	6	-0.840693	2.06733	3.2462	-0.257542	-0.553429
	well-fed	28	6	-0.773407	1.9544	3.47542	-0.144925	-0.654553
	well-fed	29	6	-0.640187	1.91563	3.72172	-0.122128	-0.789052
	well-fed	30	6	-0.879581	1.99404	3.19494	-0.217084	-0.515865
	well-fed	31	6	-1.02519	2.33516	3.34635	-0.266269	-0.54778
	well-fed	32	6	-0.666529	2.04846	3.14681	-0.37737	-0.583038
	well-fed	33	6	-0.695562	2.11445	2.91234	-0.366194	-0.525041
	well-fed	34	6	-0.37071	1.74083	2.6816	-0.158492	-0.749645
	well-fed	35	6	-0.737233	2.00285	2.85417	-0.104314	-0.674157
	well-fed	36	6	-0.668091	2.13175	2.97691	-0.275077	-0.630206
	well-fed	37	6	-0.770832	2.06641	3.00117	-0.221748	-0.634254
	well-fed	38	6	-0.694427	2.04659	3.13955	-0.279393	-0.624405
	well-fed	39	6	-0.829182	2.00573	3.39362	-0.0633938	-0.660665
	well-fed	40	6	-0.414296	1.85035	2.85337	-0.23441	-0.710543
	well-fed	41	6	-0.382294	1.90915	2.95627	-0.29658	-0.725332
	well-fed	42	6	-0.643313	1.93323	3.2394	-0.262129	-0.620093
	well-fed	43	6	-0.648454	1.99103	3.04275	-0.238306	-0.636019
	well-fed	44	6	-0.663156	1.96278	3.18982	-0.122124	-0.679059
	well-fed	45	6	-0.641843	1.74761	2.54451	-0.371415	-0.420836
	well-fed	46	6	-0.937618	2.14233	3.44807	-0.314598	-0.566522
	well-fed	47	6	-0.438464	1.9508	3.19898	-0.0613307	-0.855255
	well-fed	48	6	-0.710433	2.15709	3.10758	-0.296232	-0.607192
	well-fed	49	6	-0.610315	2.02067	3.1792	-0.316053	-0.623664
	well-fed	50	6	-0.729349	1.89057	3.12024	-0.136425	-0.599744
	well-fed	51	6	-0.320089	1.73913	3.00322	-0.330923	-0.663729
	well-fed	52	6	-0.948653	1.99981	3.5838	-0.0860425	-0.621567
	well-fed	53	6	-0.102618	1.61083	3.13669	-0.153354	-0.848908
	well-fed	54	6	-0.745135	2.15253	3.47149	-0.206158	-0.675021
	well-fed	55	6	-0.784445	2.05188	3.10743	-0.248418	-0.553073
	well-fed	56	6	-0.761006	2.13232	2.81807	-0.450095	-0.48424
	well-fed	57	6	-0.464698	2.1059	2.76943	-0.31165	-0.718294
	well-fed	58	6	-0.703367	1.98621	3.01002	-0.285157	-0.57082
	well-fed	59	6	-0.698506	1.99668	2.86264	-0.258921	-0.560649
	well-fed	60	6	-0.552612	1.96028	2.92373	-0.293007	-0.665904
	well-fed	61	6	-0.95063	2.40123	3.63376	-0.218178	-0.670804
	well-fed	62	6	-0.648998	2.05033	2.79419	-0.382458	-0.561005
	well-fed	63	6	-0.674054	2.07705	3.06004	-0.382184	-0.576085
	well-fed	64	6	-0.75823	1.9717	2.61604	-0.171316	-0.543135
	well-fed	65	6	-0.494327	1.91136	2.91286	-0.192712	-0.671283
	well-fed	66	6	-0.508164	1.97988	2.9113	-0.239179	-0.679201
	well-fed	67	6	-0.805359	2.24134	3.43947	-0.224471	-0.688376
	well-fed	68	6	-0.806434	2.16649	3.13254	-0.23868	-0.58597
	well-fed	69	6	-0.571306	2.15738	3.38077	-0.393053	-0.705547
	well-fed	70	6	-0.710655	2.01919	3.22358	-0.305545	-0.638407
	well-fed	71	6	-0.626925	2.07468	2.98487	-0.247682	-0.665537
	well-fed	72	6	-0.768642	2.0978	3.19525	-0.313255	-0.567378
	well-fed	73	6	-0.617797	1.68649	2.74256	-0.291617	-0.512734
	well-fed	74	6	-0.564658	1.98891	2.82743	-0.507657	-0.475645
	well-fed	75	6	-0.53418	2.09095	3.08745	-0.236479	-0.723305
	well-fed	76	6	-0.684252	2.05095	2.49545	-0.308918	-0.516972
	well-fed	77	6	-0.465722	1.66041	2.74957	-0.0858074	-0.66369
	well-fed	78	6	-0.704867	1.88796	3.01187	-0.392077	-0.488785
	well-fed	79	6	-0.639018	2.15436	3.73989	-0.289591	-0.804551
	well-fed	80	6	-0.936691	2.06119	3.44392	-0.124708	-0.566272
	well-fed	81	6	-0.713035	2.18408	3.4026	-0.199012	-0.736337
	well-fed	82	6	-0.668352	2.27391	3.16594	-0.495025	-0.561836
	well-fed	83	6	-0.563861	1.92178	2.68283	-0.27432	-0.55745
	well-fed	84	6	-0.981358	2.36346	3.43752	-0.23903	-0.644975
	well-fed	85	6	-0.707512	1.9815	3.08171	-0.201569	-0.60211
	well-fed	86	6	-0.867105	2.27628	3.21805	-0.449514	-0.496114
	well-fed	87	6	-0.429048	1.91823	2.54475	-0.508561	-0.490163
	well-fed	88	6	-0.842739	2.08621	3.1021	-0.181331	-0.557365
	well-fed	89	6	-0.645705	2.01426	3.43326	-0.15311	-0.723186
	well-fed	90	6	-0.703062	1.76773	2.77005	-0.112143	-0.637863
	well-fed	91	6	-0.908225	2.21367	3.26987	-0.333769	-0.557119
	well-fed	92	6	-0.526061	1.88592	3.11757	-0.153445	-0.742425
	well-fed	93	6	-0.939508	2.03495	3.05813	-0.258159	-0.481925
	well-fed	94	6	-0.790926	1.99495	3.48726	-0.0548907	-0.734021
	well-fed	95	6	-0.725893	2.00851	3.12904	-0.246887	-0.645102
	well-fed	96	6	-0.9801	1.87418	3.13544	-0.105013	-0.512619
	well-fed	97	6	-0.938	2.10893	3.20603	-0.211599	-0.570902
	well-fed	98	6	-0.691249	1.97733	3.20181	-0.229008	-0.646217
	well-fed	99	6	-0.918202	2.28884	3.47723	-0.195691	-0.648455
	well-fed	100	6	-0.934374	2.12923	3.06698	-0.24273	-0.530231
	well-fed	1	7	-1.78871	2.45917	1.55011	-0.0862142	-0.278252
	well-fed	2	7	-1.38547	2.3241	1.46901	-0.159235	-0.371742
	well-fed	3	7	-1.74694	2.47837	1.3225	-0.184261	-0.211702
	well-fed	4	7	-1.35178	1.96269	1.55516	0.197552	-0.513262
	well-fed	5	7	-1.3856	2.09306	1.97944	0.0352036	-0.518936
	well-fed	6	7	-1.86539	2.39318	1.34293	-0.0621815	-0.210345
	well-fed	7	7	-1.45665	2.42982	1.55773	-0.207848	-0.398172
	well-fed	8	7	-1.97067	2.52048	2.0507	-0.0221007	-0.308617
	well-fed	9	7	-1.74607	2.51329	0.908588	-0.197709	-0.149966
	well-fed	10	7	-1.65995	2.39517	1.76236	-0.128155	-0.290101
	well-fed	11	7	-1.38209	2.2019	1.7247	0.0426794	-0.520196
	well-fed	12	7	-1.85313	2.41156	1.30412	-0.161885	-0.149377
	well-fed	13	7	-1.30622	1.97001	1.8108	0.0733521	-0.498492
	well-fed	14	7	-1.45215	2.42213	1.53248	-0.285748	-0.31794
	well-fed	15	7	-1.79122	2.35846	1.33891	-0.125059	-0.171172
	well-fed	16	7	-1.84151	2.39422	1.94806	-0.0292813	-0.301034
	well-fed	17	7	-1.87835	2.63059	1.44849	-0.166164	-0.216599
	well-fed	18	7	-1.68872	2.54558	1.47398	-0.27987	-0.254602
	well-fed	19	7	-1.99963	2.63656	1.35129	-0.274958	-0.0572092
	well-fed	20	7	-1.67466	2.33302	1.34783	-0.107295	-0.248775
	well-fed	21	7	-1.38947	2.30939	1.67521	-0.163184	-0.441473
	well-fed	22	7	-1.39745	2.09715	1.5277	-0.0127405	-0.375197
	well-fed	23	7	-1.78553	2.43313	1.42607	-0.224262	-0.191602
	well-fed	24	7	-1.79789	2.53021	1.83778	-0.0301468	-0.351453
	well-fed	25	7	-1.81558	2.36282	1.4337	-0.125311	-0.167774
	well-fed	26	7	-1.56208	2.29794	1.46214	-0.145469	-0.305464
	well-fed	27	7	-1.5276	2.24635	1.63263	-0.0618835	-0.369171
	well-fed	28	7	-1.79313	2.42258	1.54471	-0.133768	-0.222525
	well-fed	29	7	-1.83234	2.44325	1.68647	-0.0793275	-0.254585
	well-fed	30	7	-1.87781	2.45892	1.44984	-0.134404	-0.131696
	well-fed	31	7	-1.75574	2.62299	1.86358	-0.185274	-0.294689
	well-fed	32	7	-1.58092	2.44096	1.31578	-0.275427	-0.233899
	well-fed	33	7	-1.50648	2.12756	1.39895	-0.0255552	-0.341283
	well-fed	34	7	-1.53996	2.3308	1.32342	-0.0576892	-0.383197
	well-fed	35	7	-1.99558	2.55262	1.22466	-0.145224	-0.130361
	well-fed	36	7	-1.91523	2.45572	1.64053	-0.0709803	-0.194825
	well-fed	37	7	-1.86953	2.45946	1.28505	-0.0997607	-0.243648
	well-fed	38	7	-2.07991	2.56418	1.43441	-0.217153	-0.045741
	well-fed	39	7	-1.7108	2.3864	1.608	0.0286664	-0.370746
	well-fed	40	7	-1.49286	2.23066	1.62768	-0.0915812	-0.361194
	well-fed	41	7	-1.44306	2.19242	1.73934	-0.0780463	-0.391524
	well-fed	42	7	-1.92996	2.39325	1.22157	-0.0764181	-0.159447
	well-fed	43	7	-1.62702	2.37396	1.48736	-0.084228	-0.301448
	well-fed	44	7	-2.00605	2.52964	1.77861	-0.029549	-0.199103
	well-fed	45	7	-1.50527	2.14682	1.40727	-0.108672	-0.276164
	well-fed	46	7	-1.56521	2.51239	1.85635	-0.133048	-0.450995
	well-fed	47	7	-1.66922	2.36905	1.62439	0.198487	-0.456619
	well-fed	48	7	-1.83598	2.66848	1.32217	-0.262415	-0.18277
	well-fed	49	7	-1.3343	2.24493	1.3979	-0.151832	-0.364873
	well-fed	50	7	-1.92618	2.42672	1.36005	-0.142183	-0.12049
	well-fed	51	7	-1.54525	2.39244	0.970953	-0.314964	-0.143502
	well-fed	52	7	-1.95886	2.43229	1.58653	-0.0709825	-0.190577
	well-fed	53	7	-1.61623	2.37427	1.83508	-0.00631038	-0.430539
	well-fed	54	7	-1.57173	2.43113	1.4613	-0.219322	-0.303688
	well-fed	55	7	-1.50102	2.29377	1.41274	-0.0829174	-0.34832
	well-fed	56	7	-1.59783	2.19894	1.3789	-0.204461	-0.150868
	well-fed	57	7	-1.10518	2.06408	1.69337	-0.00985458	-0.555495
	well-fed	58	7	-1.25562	2.12422	1.25645	-0.103471	-0.367408
	well-fed	59	7	-1.69087	2.27763	1.30449	-0.0545611	-0.224166
	well-fed	60	7	-1.68538	2.31109	1.14337	-0.155166	-0.180976
	well-fed	61	7	-2.114	2.70509	1.46795	-0.232705	-0.0654234
	well-fed	62	7	-1.6704	2.49395	1.33273	-0.313125	-0.196532
	well-fed	63	7	-1.45344	2.25318	1.59	-0.0587262	-0.416253
	well-fed	64	7	-1.35758	2.0358	1.72559	0.110907	-0.486157
	well-fed	65	7	-2.0721	2.62714	1.30446	-0.23289	-0.0398511
	well-fed	66	7	-1.44305	2.34106	1.55855	-0.0933429	-0.39555
	well-fed	67	7	-1.55036	2.29621	1.73627	0.0308407	-0.438876
	well-fed	68	7	-1.68762	2.38256	1.62927	-0.129668	-0.213269
	well-fed	69	7	-1.70309	2.52674	1.90425	-0.151514	-0.362109
	well-fed	70	7	-1.79942	2.47492	1.28535	-0.264433	-0.156422
	well-fed	71	7	-1.52938	2.26533	1.56712	-0.262028	-0.244539
	well-fed	72	7	-2.0012	2.54285	1.2592	-0.249975	-0.0378178
	well-fed	73	7	-2.01943	2.4396	1.23307	-0.149257	-0.016478
	well-fed	74	7	-2.01005	2.48419	1.47031	-0.194864	-0.0645134
	well-fed	75	7	-1.46367	2.26457	1.47226	-0.0764803	-0.35044
	well-fed	76	7	-1.63413	2.42002	1.17953	-0.15774	-0.243621
	well-fed	77	7	-1.42149	2.06463	1.29287	0.0968914	-0.41207
	well-fed	78	7	-1.45832	2.34584	1.12603	-0.292602	-0.243054
	well-fed	79	7	-1.84701	2.71509	1.60655	-0.281532	-0.214774
	well-fed	80	7	-1.72119	2.44951	1.74784	-0.01663	-0.317696
	well-fed	81	7	-1.34806	2.21292	1.72267	-0.0533295	-0.454137
	well-fed	82	7	-1.48466	2.37487	1.42455	-0.159901	-0.352642
	well-fed	83	7	-1.29169	1.94617	1.49274	0.109647	-0.448128
	well-fed	84	7	-1.52037	2.30977	2.08155	0.0584897	-0.517488
	well-fed	85	7	-2.1006	2.69921	1.4447	-0.294957	-0.0162243
	well-fed	86	7	-1.59672	2.43653	1.50047	-0.134202	-0.323366
	well-fed	87	7	-1.26471	2.18218	1.29496	-0.18257	-0.361274
	well-fed	88	7	-1.58034	2.32174	1.04675	-0.108298	-0.251733
	well-fed	89	7	-2.16335	2.70767	1.65658	-0.208037	-0.0778061
	well-fed	90	7	-1.58954	2.16462	1.58414	-0.088674	-0.292416
	well-fed	91	7	-1.30484	2.15526	1.45528	-0.00526825	-0.498075
	well-fed	92	7	-1.77787	2.41728	1.70972	0.0503137	-0.372167
	well-fed	93	7	-1.472	2.06063	1.85209	0.0273929	-0.429029
	well-fed	94	7	-1.62593	2.19134	1.76766	0.0110997	-0.383233
	well-fed	95	7	-1.68514	2.47189	1.29185	-0.167892	-0.282419
	well-fed	96	7	-1.86586	2.18592	1.18872	-0.143267	-0.0582774
	well-fed	97	7	-1.32458	2.20217	1.50683	-0.0717877	-0.475225
	well-fed	98	7	-1.72098	2.34065	1.78359	0.0261218	-0.337608
	well-fed	99	7	-1.50429	2.3421	1.45356	-0.0146351	-0.419276
	well-fed	100	7	-1.43731	2.23653	1.96072	0.103616	-0.537072
	well-fed	1	8	-1.08751	1.51297	1.80522	-0.050209	-0.365931
	well-fed	2	8	-0.954561	1.51618	1.82941	-0.148752	-0.404357
	well-fed	3	8	-0.944441	1.43572	1.47737	-0.0971237	-0.347166
	well-fed	4	8	-0.809624	1.50201	2.11544	0.0941178	-0.646533
	well-fed	5	8	-1.00934	1.3524	2.1064	-0.0797145	-0.37612
	well-fed	6	8	-0.948354	1.52916	1.7173	-0.200974	-0.373205
	well-fed	7	8	-0.769621	1.35085	1.84339	0.0433629	-0.575304
	well-fed	8	8	-0.918955	1.6265	2.48488	0.0242802	-0.626269
	well-fed	9	8	-0.876685	1.41258	0.630665	-0.20009	-0.216033
	well-fed	10	8	-1.18532	1.61165	2.55829	-0.0241346	-0.388481
	well-fed	11	8	-0.830231	1.45976	2.17381	0.0946971	-0.611844
	well-fed	12	8	-1.01751	1.26779	1.63152	0.00025577	-0.275971
	well-fed	13	8	-0.838025	1.24698	2.41714	0.139253	-0.603546
	well-fed	14	8	-0.794316	1.3529	2.08874	-0.00325193	-0.500121
	well-fed	15	8	-1.01964	1.38246	1.73195	-0.00343013	-0.354175
	well-fed	16	8	-1.03717	1.45755	2.3891	0.0231804	-0.49295
	well-fed	17	8	-1.13493	1.5149	2.12033	0.135435	-0.469926
	well-fed	18	8	-0.80599	1.31184	2.04563	0.0705623	-0.577844
	well-fed	19	8	-1.12256	1.5549	2.24507	-0.0105128	-0.384159
	well-fed	20	8	-1.20703	1.29326	2.24204	0.107067	-0.350173
	well-fed	21	8	-0.839726	1.46998	2.12852	0.0318535	-0.572601
	well-fed	22	8	-0.837277	1.40566	2.08093	0.0530135	-0.531516
	well-fed	23	8	-0.751748	1.41206	2.17406	0.0944623	-0.648997
	well-fed	24	8	-0.996676	1.63107	2.30524	-0.0253695	-0.529535
	well-fed	25	8	-0.965715	1.51708	1.75917	-0.240409	-0.303843
	well-fed	26	8	-0.955037	1.41087	2.48542	0.0525804	-0.50802
	well-fed	27	8	-0.956121	1.46994	2.22073	-0.0957968	-0.430131
	well-fed	28	8	-1.04238	1.53061	2.21082	-0.038856	-0.440686
	well-fed	29	8	-1.17171	1.41158	2.08199	0.111574	-0.392223
	well-fed	30	8	-1.36098	1.61693	1.8997	-0.27959	-0.0630008
	well-fed	31	8	-1.18035	1.4877	2.63681	-0.00512321	-0.367153
	well-fed	32	8	-0.960809	1.33595	2.02645	-0.031405	-0.374068
	well-fed	33	8	-0.867604	1.43996	2.43757	0.176025	-0.614564
	well-fed	34	8	-0.836567	1.52644	1.48302	0.0236717	-0.534107
	well-fed	35	8	-0.926586	1.56346	1.39014	-0.106647	-0.393735
	well-fed	36	8	-0.935882	1.53373	1.74132	-0.175147	-0.346658
	well-fed	37	8	-1.03734	1.36993	1.6523	0.0556229	-0.39768
	well-fed	38	8	-1.0272	1.30247	1.89761	0.0504731	-0.350478
	well-fed	39	8	-1.1358	1.41604	2.06418	0.106649	-0.385619
	well-fed	40	8	-0.81	1.36504	2.28233	0.039848	-0.570708
	well-fed	41	8	-0.605477	1.3559	2.12627	-0.077938	-0.61193
	well-fed	42	8	-1.20936	1.55058	2.19563	0.0510226	-0.396083
	well-fed	43	8	-0.817767	1.32639	2.00323	0.0137871	-0.515497
	well-fed	44	8	-1.01359	1.28746	1.93047	0.157616	-0.441936
	well-fed	45	8	-1.07304	1.45102	1.61195	-0.215518	-0.230818
	well-fed	46	8	-1.03473	1.40089	2.60533	0.166398	-0.604519
	well-fed	47	8	-1.0273	1.57442	2.00035	0.104376	-0.538795
	well-fed	48	8	-1.30892	1.59525	1.80467	-0.0654379	-0.226422
	well-fed	49	8	-0.817615	1.51961	2.27227	-0.047217	-0.552812
	well-fed	50	8	-1.13263	1.46186	1.97848	-0.0204368	-0.320399
	well-fed	51	8	-0.921724	1.31554	1.5138	-0.0979206	-0.309657
	well-fed	52	8	-1.25143	1.54629	2.24062	-0.0566421	-0.308069
	well-fed	53	8	-0.822645	1.50179	2.95179	0.0707337	-0.676588
	well-fed	54	8	-0.745462	1.36966	2.60417	0.264298	-0.767606
	well-fed	55	8	-0.812234	1.25556	2.08173	0.205993	-0.607424
	well-fed	56	8	-1.0027	1.37763	1.98249	-0.0681394	-0.347432
	well-fed	57	8	-0.627042	1.43753	1.6826	0.0036988	-0.594122
	well-fed	58	8	-0.958608	1.3698	2.10632	-0.142835	-0.323486
	well-fed	59	8	-0.965846	1.34037	1.79045	0.00436156	-0.360204
	well-fed	60	8	-0.993594	1.46196	1.63891	-0.10023	-0.318486
	well-fed	61	8	-1.2333	1.51861	2.0085	0.0594637	-0.325447
	well-fed	62	8	-0.901105	1.3555	1.33808	-0.0269672	-0.357424
	well-fed	63	8	-0.760313	1.36839	1.83913	-0.016332	-0.511489
	well-fed	64	8	-0.837972	1.25474	2.10656	0.100057	-0.53561
	well-fed	65	8	-0.897762	1.38929	1.56969	0.0334242	-0.417432
	well-fed	66	8	-0.893892	1.4225	2.59961	0.0925564	-0.60363
	well-fed	67	8	-0.961113	1.5325	2.02285	-0.0622685	-0.422352
	well-fed	68	8	-0.789071	1.37555	2.69485	0.0627282	-0.624952
	well-fed	69	8	-0.737912	1.33989	2.20717	0.140611	-0.656575
	well-fed	70	8	-1.12989	1.41639	1.76072	0.00805239	-0.32892
	well-fed	71	8	-0.928357	1.29019	2.59002	0.0761805	-0.526946
	well-fed	72	8	-1.05145	1.40926	1.59679	0.0431923	-0.354868
	well-fed	73	8	-1.23253	1.38425	1.76985	0.0185008	-0.252473
	well-fed	74	8	-1.22131	1.48929	2.00595	-0.142203	-0.213258
	well-fed	75	8	-0.673962	1.41203	2.07599	0.0702786	-0.668909
	well-fed	76	8	-1.07499	1.48614	1.78483	-0.0541027	-0.323478
	well-fed	77	8	-0.794484	1.39917	1.75922	0.188283	-0.623216
	well-fed	78	8	-1.27644	1.33984	1.97947	-0.0872655	-0.128708
	well-fed	79	8	-1.04838	1.55646	1.99136	-0.10662	-0.339625
	well-fed	80	8	-1.3435	1.65946	2.64408	-0.0836583	-0.289477
	well-fed	81	8	-0.816972	1.27492	2.44552	0.151914	-0.631208
	well-fed	82	8	-0.760607	1.42111	1.79194	-0.0137382	-0.525173
	well-fed	83	8	-0.887424	1.43466	2.08018	0.00719042	-0.464501
	well-fed	84	8	-0.907921	1.54487	2.29797	-0.0917285	-0.53096
	well-fed	85	8	-1.27737	1.47543	1.82094	-0.0920624	-0.152852
	well-fed	86	8	-1.20978	1.47983	1.81846	-0.142997	-0.196801
	well-fed	87	8	-1.00016	1.39125	1.90321	0.00889678	-0.388986
	well-fed	88	8	-1.00956	1.47676	1.42741	-0.0400685	-0.297168
	well-fed	89	8	-1.00371	1.44026	2.00865	0.0968722	-0.50336
	well-fed	90	8	-0.739859	1.15144	2.14213	0.1592	-0.62048
	well-fed	91	8	-0.815462	1.34423	2.02118	0.0916047	-0.541356
	well-fed	92	8	-1.03862	1.49135	1.62753	-0.230927	-0.257098
	well-fed	93	8	-0.925199	1.31269	2.285	0.0856098	-0.50211
	well-fed	94	8	-0.921509	1.27762	2.62917	0.364861	-0.736857
	well-fed	95	8	-0.979154	1.31455	1.64631	0.102224	-0.455
	well-fed	96	8	-1.21825	1.27907	1.99673	-0.061322	-0.190616
	well-fed	97	8	-0.957878	1.37408	2.63747	0.271144	-0.632524
	well-fed	98	8	-0.965068	1.40898	2.03731	-0.0431236	-0.420206
	well-fed	99	8	-0.815118	1.53249	2.55725	0.259129	-0.768061
	well-fed	100	8	-1.00202	1.55864	2.05636	0.0143072	-0.447836
	well-fed	1	9	-1.68115	2.25535	1.73402	-0.228873	-0.0631689
	well-fed	2	9	-1.54095	2.44677	1.42348	-0.464486	-0.0664491
	well-fed	3	9	-1.52633	2.2681	1.39914	-0.366041	-0.0742294
	well-fed	4	9	-1.36629	2.072	1.51925	-0.143656	-0.261654
	well-fed	5	9	-1.48393	2.15734	1.34265	-0.363048	-0.0714994
	well-fed	6	9	-1.49851	2.20769	1.35201	-0.288984	-0.117932
	well-fed	7	9	-1.39896	2.16618	1.45502	-0.278227	-0.208288
	well-fed	8	9	-1.53698	2.36448	2.04658	-0.193828	-0.317316
	well-fed	9	9	-1.41617	2.25148	0.596866	-0.533238	0.0759405
	well-fed	10	9	-1.7008	2.32867	2.04123	-0.287585	-0.0805017
	well-fed	11	9	-1.49526	2.34485	1.2934	-0.422681	-0.0960762
	well-fed	12	9	-1.66559	2.05215	1.44243	-0.183072	0.0220246
	well-fed	13	9	-1.47919	1.91452	1.67854	-0.0875198	-0.184248
	well-fed	14	9	-1.40143	2.08161	1.7777	-0.191728	-0.219467
	well-fed	15	9	-1.48604	2.08261	1.16471	-0.307257	-0.0287893
	well-fed	16	9	-1.53794	2.23465	1.36626	-0.331619	-0.0594756
	well-fed	17	9	-1.61011	2.23883	1.62391	-0.16936	-0.11567
	well-fed	18	9	-1.46235	2.18984	1.39821	-0.307486	-0.148586
	well-fed	19	9	-1.60497	2.23377	1.72819	-0.252973	-0.0844282
	well-fed	20	9	-1.60293	2.17834	1.54056	-0.236498	-0.0670116
	well-fed	21	9	-1.40843	2.2665	1.2626	-0.358112	-0.133014
	well-fed	22	9	-1.3496	2.11629	1.53352	-0.218115	-0.216191
	well-fed	23	9	-1.31832	2.10295	1.40913	-0.287061	-0.216318
	well-fed	24	9	-1.64935	2.365	1.9188	-0.263765	-0.142758
	well-fed	25	9	-1.68922	2.36926	1.47598	-0.432095	0.0331299
	well-fed	26	9	-1.54159	2.16129	1.59157	-0.207434	-0.125221
	well-fed	27	9	-1.55112	2.13043	1.79083	-0.179968	-0.151814
	well-fed	28	9	-1.5714	2.20937	1.72551	-0.276613	-0.111034
	well-fed	29	9	-1.73268	2.16974	1.60073	-0.154259	-0.0211771
	well-fed	30	9	-1.7627	2.27184	1.72527	-0.254073	-0.000318513
	well-fed	31	9	-1.66789	2.2352	2.03183	-0.173427	-0.107015
	well-fed	32	9	-1.51217	2.15463	1.47442	-0.396544	-0.0308923
	well-fed	33	9	-1.48478	2.19851	1.75218	-0.141889	-0.212143
	well-fed	34	9	-1.43611	2.30274	1.14823	-0.382712	-0.0923631
	well-fed	35	9	-1.64338	2.28797	1.41387	-0.317546	-0.0401242
	well-fed	36	9	-1.56168	2.18928	1.62305	-0.225987	-0.100532
	well-fed	37	9	-1.69776	2.16672	1.40266	-0.233193	-0.0199879
	well-fed	38	9	-1.74543	2.21007	1.74419	-0.254721	0.0209494
	well-fed	39	9	-1.62204	2.07721	1.52602	-0.0897481	-0.0707455
	well-fed	40	9	-1.42192	2.25885	1.91672	-0.275676	-0.258872
	well-fed	41	9	-1.42837	2.32184	1.6809	-0.394091	-0.176411
	well-fed	42	9	-1.5659	2.20249	1.32251	-0.292998	-0.0559352
	well-fed	43	9	-1.43415	2.12372	1.46715	-0.256442	-0.15445
	well-fed	44	9	-1.7851	2.12795	1.7542	-0.0706115	-0.0322564
	well-fed	45	9	-1.54516	2.18267	1.35655	-0.381069	-0.0320465
	well-fed	46	9	-1.5246	2.33859	1.7129	-0.372472	-0.162054
	well-fed	47	9	-1.6436	2.23208	1.90288	-0.00505156	-0.250503
	well-fed	48	9	-1.86477	2.42126	1.72507	-0.246025	-0.0276134
	well-fed	49	9	-1.38039	2.22382	1.39249	-0.35096	-0.143978
	well-fed	50	9	-1.72844	2.12482	1.69559	-0.142771	-0.0331862
	well-fed	51	9	-1.50939	2.14942	1.10812	-0.410789	0.0603957
	well-fed	52	9	-1.69836	2.20665	1.49444	-0.238589	-0.0226792
	well-fed	53	9	-1.31562	2.22961	2.37233	-0.194197	-0.405704
	well-fed	54	9	-1.36964	2.14433	1.88856	-0.128672	-0.305769
	well-fed	55	9	-1.47101	2.00196	1.5383	-0.0530356	-0.201851
	well-fed	56	9	-1.72769	2.22303	1.63921	-0.287938	-0.00110808
	well-fed	57	9	-1.26338	2.14252	1.55608	-0.222082	-0.260868
	well-fed	58	9	-1.51368	2.2424	1.60189	-0.405774	-0.0373325
	well-fed	59	9	-1.46484	2.07535	1.23916	-0.267175	-0.0427641
	well-fed	60	9	-1.59661	2.21769	1.31665	-0.360834	0.026842
	well-fed	61	9	-1.75662	2.21816	1.65885	-0.183673	-0.0281894
	well-fed	62	9	-1.5309	2.12125	1.31639	-0.269279	-0.0339308
	well-fed	63	9	-1.38366	2.14559	1.29319	-0.333779	-0.13955
	well-fed	64	9	-1.55076	2.06277	1.59332	-0.159005	-0.102286
	well-fed	65	9	-1.52467	2.16556	1.38714	-0.203271	-0.0738254
	well-fed	66	9	-1.44324	2.26251	1.83046	-0.293616	-0.203996
	well-fed	67	9	-1.49005	2.16392	1.45669	-0.323777	-0.0569848
	well-fed	68	9	-1.37026	2.12431	1.96629	-0.232331	-0.246479
	well-fed	69	9	-1.46437	2.35487	1.61769	-0.286505	-0.2044
	well-fed	70	9	-1.72841	2.23647	1.4765	-0.29678	0.0357571
	well-fed	71	9	-1.32851	2.00182	1.77869	-0.216785	-0.239446
	well-fed	72	9	-1.59171	2.2704	1.06779	-0.438989	0.0857332
	well-fed	73	9	-1.76922	2.1137	1.39094	-0.181324	0.0359564
	well-fed	74	9	-1.86056	2.33336	1.71327	-0.507407	0.208346
	well-fed	75	9	-1.3205	2.10124	1.64473	-0.209782	-0.258147
	well-fed	76	9	-1.36817	2.0619	1.17258	-0.170178	-0.157272
	well-fed	77	9	-1.37213	2.01405	1.31453	-0.0823478	-0.228106
	well-fed	78	9	-1.40394	1.93723	1.27698	-0.170643	-0.086672
	well-fed	79	9	-1.58247	2.40501	1.33124	-0.535852	0.0468447
	well-fed	80	9	-1.73429	2.37064	1.95028	-0.264301	-0.0489404
	well-fed	81	9	-1.40716	2.14326	1.78807	-0.16516	-0.248089
	well-fed	82	9	-1.39833	2.23912	1.26927	-0.355694	-0.134079
	well-fed	83	9	-1.39729	2.17088	1.22333	-0.328522	-0.0686775
	well-fed	84	9	-1.48806	2.32276	1.66643	-0.354783	-0.14324
	well-fed	85	9	-1.85937	2.26307	1.76412	-0.299267	0.115482
	well-fed	86	9	-1.72353	2.13261	1.7827	-0.144451	-0.0477729
	well-fed	87	9	-1.34614	2.08671	0.864453	-0.305497	-0.0511647
	well-fed	88	9	-1.52678	2.10887	1.18013	-0.199703	-0.0361349
	well-fed	89	9	-1.63814	2.25807	1.57108	-0.334391	-0.0282099
	well-fed	90	9	-1.4715	1.99285	1.91378	-0.0580155	-0.256126
	well-fed	91	9	-1.52856	2.09052	1.4725	-0.167427	-0.131376
	well-fed	92	9	-1.57145	2.2801	1.38981	-0.371123	-0.0497395
	well-fed	93	9	-1.57421	2.07542	1.62389	-0.193856	-0.0952103
	well-fed	94	9	-1.546	1.94078	1.88494	-0.0323413	-0.197417
	well-fed	95	9	-1.5903	2.15591	1.399	-0.244325	-0.0479586
	well-fed	96	9	-1.68063	1.86148	1.37886	-0.167079	0.0693684
	well-fed	97	9	-1.35726	1.96837	1.36569	-0.0764555	-0.23922
	well-fed	98	9	-1.57488	2.22718	1.61572	-0.351026	-0.0337423
	well-fed	99	9	-1.29871	2.18245	1.59263	-0.142265	-0.326125
	well-fed	100	9	-1.61535	2.25676	1.61846	-0.167896	-0.126784
	well-fed	1	10	-1.29843	2.39523	1.67354	-0.286711	-0.275986
	well-fed	2	10	-1.12919	2.48216	1.57227	-0.435664	-0.32482
	well-fed	3	10	-1.14224	2.61898	1.55419	-0.371548	-0.367995
	well-fed	4	10	-0.872301	2.06112	2.11518	0.120938	-0.711299
	well-fed	5	10	-1.10484	2.35379	2.25535	-0.297483	-0.432259
	well-fed	6	10	-1.20862	2.40168	1.71144	-0.241397	-0.35196
	well-fed	7	10	-1.01892	2.50356	2.3427	-0.259906	-0.617523
	well-fed	8	10	-1.02485	2.4983	2.31081	-0.146832	-0.65031
	well-fed	9	10	-1.1529	2.36424	0.785116	-0.360734	-0.190232
	well-fed	10	10	-1.32186	2.77449	2.34548	-0.442865	-0.307587
	well-fed	11	10	-1.07389	2.58515	1.98205	-0.202541	-0.566345
	well-fed	12	10	-1.39122	2.41615	1.82098	-0.421157	-0.119329
	well-fed	13	10	-0.995937	2.33747	3.04309	-0.00810003	-0.75314
	well-fed	14	10	-0.989776	2.65006	2.57506	-0.297518	-0.612862
	well-fed	15	10	-1.07742	2.4508	1.58494	-0.254968	-0.422196
	well-fed	16	10	-1.00895	2.56272	2.21627	-0.26177	-0.565107
	well-fed	17	10	-1.2368	2.7049	1.70586	-0.319575	-0.376213
	well-fed	18	10	-1.02348	2.46939	2.14625	-0.329645	-0.522771
	well-fed	19	10	-1.22543	2.4801	1.82902	-0.279458	-0.357206
	well-fed	20	10	-1.18498	2.27768	2.03904	-0.179669	-0.423703
	well-fed	21	10	-0.997846	2.58662	2.04624	-0.37215	-0.514681
	well-fed	22	10	-0.908077	2.47673	2.07352	-0.170566	-0.583634
	well-fed	23	10	-0.923078	2.44866	2.48411	-0.143693	-0.712464
	well-fed	24	10	-1.02589	2.67208	2.27192	-0.266818	-0.619596
	well-fed	25	10	-1.30697	2.53275	1.96236	-0.405192	-0.261812
	well-fed	26	10	-1.10945	2.22433	1.96042	-0.175911	-0.382124
	well-fed	27	10	-1.15559	2.45073	2.19663	-0.292802	-0.43823
	well-fed	28	10	-1.31103	2.42147	2.35242	-0.183099	-0.440647
	well-fed	29	10	-1.29438	2.26512	2.13338	-0.10903	-0.417166
	well-fed	30	10	-1.45812	2.60313	2.28145	-0.390419	-0.21133
	well-fed	31	10	-1.38744	2.56861	2.42912	-0.367877	-0.281899
	well-fed	32	10	-1.20059	2.56066	1.80513	-0.375166	-0.3431
	well-fed	33	10	-0.938462	2.50151	1.80931	-0.256884	-0.496393
	well-fed	34	10	-1.12084	2.57872	1.66501	-0.283028	-0.467487
	well-fed	35	10	-1.24474	2.4629	1.57855	-0.38217	-0.295155
	well-fed	36	10	-1.2584	2.56676	1.89132	-0.261268	-0.38075
	well-fed	37	10	-1.32083	2.52079	1.80336	-0.288235	-0.34493
	well-fed	38	10	-1.19805	2.49533	1.90358	-0.369617	-0.326564
	well-fed	39	10	-1.253	2.50799	1.73355	-0.253797	-0.328388
	well-fed	40	10	-0.809528	2.32869	2.56202	-0.162742	-0.724278
	well-fed	41	10	-1.15028	2.75897	2.68043	-0.362693	-0.516513
	well-fed	42	10	-1.28306	2.44068	1.41166	-0.38169	-0.247247
	well-fed	43	10	-0.899764	2.19402	2.26639	-0.101974	-0.63685
	well-fed	44	10	-1.21361	2.41816	2.08519	-0.0773747	-0.459502
	well-fed	45	10	-1.27553	2.61756	2.46857	-0.337688	-0.400383
	well-fed	46	10	-1.22774	2.37952	2.22948	-0.28875	-0.440393
	well-fed	47	10	-1.27595	2.53579	2.03561	-0.130253	-0.481477
	well-fed	48	10	-1.40935	2.79082	1.76119	-0.378511	-0.315224
	well-fed	49	10	-0.965457	2.46665	2.27389	-0.281013	-0.541897
	well-fed	50	10	-1.20325	2.34901	1.59911	-0.233919	-0.311801
	well-fed	51	10	-1.15875	2.25235	1.35815	-0.426013	-0.188745
	well-fed	52	10	-1.33203	2.47678	2.06458	-0.260272	-0.335059
	well-fed	53	10	-1.1896	2.57464	3.00442	-0.126609	-0.653179
	well-fed	54	10	-1.06997	2.67323	2.60977	-0.302886	-0.598235
	well-fed	55	10	-1.005	2.43031	2.28903	-0.0640634	-0.657868
	well-fed	56	10	-1.20255	2.31505	2.15034	-0.234534	-0.374942
	well-fed	57	10	-0.76933	2.41512	2.21525	-0.120239	-0.73435
	well-fed	58	10	-1.12931	2.50008	1.79641	-0.522451	-0.208058
	well-fed	59	10	-1.04786	2.41703	1.83011	-0.219581	-0.463226
	well-fed	60	10	-1.11609	2.44285	1.45214	-0.418247	-0.339496
	well-fed	61	10	-1.27967	2.56553	1.36336	-0.355159	-0.215165
	well-fed	62	10	-1.13576	2.61557	1.70615	-0.436532	-0.369124
	well-fed	63	10	-0.870959	2.43827	2.0661	-0.20345	-0.620912
	well-fed	64	10	-1.02516	2.48085	2.66451	-0.0546656	-0.66674
	well-fed	65	10	-1.19398	2.54909	1.51623	-0.324177	-0.310132
	well-fed	66	10	-0.927758	2.48709	2.99965	-0.0767379	-0.788791
	well-fed	67	10	-1.17921	2.6317	2.27532	-0.212592	-0.514528
	well-fed	68	10	-0.995522	2.39658	2.77928	-0.105594	-0.631186
	well-fed	69	10	-0.990876	2.59389	2.3875	-0.263193	-0.630319
	well-fed	70	10	-1.24344	2.54362	1.60779	-0.39075	-0.314018
	well-fed	71	10	-1.0099	2.54003	2.53	-0.339607	-0.567475
	well-fed	72	10	-1.27593	2.46192	1.38234	-0.376781	-0.218902
	well-fed	73	10	-1.29808	2.38653	1.8993	-0.269514	-0.33356
	well-fed	74	10	-1.2297	2.62801	1.8283	-0.356678	-0.330549
	well-fed	75	10	-0.946546	2.52171	2.53394	-0.113764	-0.717512
	well-fed	76	10	-1.25997	2.46289	1.16008	-0.356854	-0.143761
	well-fed	77	10	-0.943009	2.52429	2.16182	-0.0343747	-0.707571
	well-fed	78	10	-1.07027	2.21192	1.39058	-0.325431	-0.295427
	well-fed	79	10	-1.23774	2.62734	2.21831	-0.347889	-0.407914
	well-fed	80	10	-1.22956	2.29191	2.27583	-0.202493	-0.359901
	well-fed	81	10	-0.922631	2.58121	2.51965	-0.216321	-0.686822
	well-fed	82	10	-0.997473	2.63802	1.72392	-0.363414	-0.493949
	well-fed	83	10	-1.07012	2.47012	2.06541	-0.237227	-0.437747
	well-fed	84	10	-0.99913	2.60671	2.31103	-0.261151	-0.605522
	well-fed	85	10	-1.40051	2.37421	1.57592	-0.332326	-0.139806
	well-fed	86	10	-1.58163	2.59006	2.20515	-0.389901	-0.155796
	well-fed	87	10	-1.14531	2.51785	1.98958	-0.369135	-0.382387
	well-fed	88	10	-1.15582	2.47316	1.19117	-0.407181	-0.215415
	well-fed	89	10	-1.40079	2.4924	2.16524	-0.202473	-0.362478
	well-fed	90	10	-1.02528	2.22856	2.47433	-0.084291	-0.625006
	well-fed	91	10	-1.06177	2.52849	2.29432	-0.237474	-0.548083
	well-fed	92	10	-1.18507	2.44062	1.70026	-0.201817	-0.428259
	well-fed	93	10	-1.19919	2.48261	2.59202	-0.253839	-0.471667
	well-fed	94	10	-0.883258	2.28358	2.39973	-0.023446	-0.741593
	well-fed	95	10	-1.15562	2.49398	1.38429	-0.341213	-0.314944
	well-fed	96	10	-1.30765	2.01121	1.83727	-0.204186	-0.211555
	well-fed	97	10	-0.863511	2.43429	2.01225	-0.234656	-0.620765
	well-fed	98	10	-1.21127	2.42196	2.40385	-0.182604	-0.488397
	well-fed	99	10	-0.909501	2.50108	2.40536	-0.0944413	-0.743886
	well-fed	100	10	-1.12526	2.33829	2.13304	-0.168478	-0.458384
	well-fed	1	11	-1.26916	2.32702	4.30399	-0.218257	-0.689445
	well-fed	2	11	-1.07991	2.09988	3.16274	-0.438425	-0.444066
	well-fed	3	11	-1.06647	2.04996	3.42953	-0.303147	-0.542474
	well-fed	4	11	-1.08754	2.00227	3.63781	-0.0731429	-0.707246
	well-fed	5	11	-1.12601	1.8721	3.33294	-0.22022	-0.526673
	well-fed	6	11	-1.23709	2.01418	3.11511	-0.310402	-0.414594
	well-fed	7	11	-1.07413	2.02736	3.07385	-0.409822	-0.487139
	well-fed	8	11	-1.2774	2.35237	4.12256	-0.118582	-0.755624
	well-fed	9	11	-0.908816	1.92793	3.06834	-0.308875	-0.555759
	well-fed	10	11	-1.10181	1.95742	3.52432	-0.251552	-0.550042
	well-fed	11	11	-1.16102	2.05381	3.67508	-0.211229	-0.571868
	well-fed	12	11	-1.09695	1.76766	2.72962	-0.220302	-0.414007
	well-fed	13	11	-1.11281	1.80887	3.83191	0.0014848	-0.676393
	well-fed	14	11	-1.00032	2.01526	3.4163	-0.38231	-0.527254
	well-fed	15	11	-1.15018	1.91852	3.68123	-0.0616558	-0.617394
	well-fed	16	11	-1.07124	2.00338	3.19394	-0.369119	-0.472311
	well-fed	17	11	-1.31455	2.30481	4.35337	-0.123969	-0.685255
	well-fed	18	11	-0.999724	2.0144	3.20561	-0.353954	-0.575435
	well-fed	19	11	-1.26965	2.08419	3.08631	-0.391796	-0.371649
	well-fed	20	11	-1.1328	1.97885	3.61217	-0.125481	-0.622143
	well-fed	21	11	-1.04382	2.11736	3.00237	-0.445644	-0.477193
	well-fed	22	11	-1.11847	2.04216	3.33808	-0.280085	-0.526783
	well-fed	23	11	-1.27537	2.08275	3.68551	-0.353458	-0.462035
	well-fed	24	11	-1.28248	2.16526	3.76532	-0.373435	-0.46961
	well-fed	25	11	-1.15784	2.08919	3.44466	-0.274384	-0.527892
	well-fed	26	11	-1.27458	1.9073	3.70581	-0.0322851	-0.567478
	well-fed	27	11	-1.17324	2.03017	3.37666	-0.32055	-0.482711
	well-fed	28	11	-1.14349	2.09693	3.69781	-0.238012	-0.60478
	well-fed	29	11	-1.17879	1.92193	3.54327	-0.136698	-0.578124
	well-fed	30	11	-1.35696	2.0721	3.61725	-0.2346	-0.453739
	well-fed	31	11	-1.1438	2.02527	3.54006	-0.213178	-0.569644
	well-fed	32	11	-1.10102	2.01759	3.37007	-0.438686	-0.41598
	well-fed	33	11	-1.1854	1.98741	3.27876	-0.232697	-0.477599
	well-fed	34	11	-1.11213	2.03675	2.88591	-0.264218	-0.507794
	well-fed	35	11	-1.07165	2.07066	2.89968	-0.210277	-0.581341
	well-fed	36	11	-1.02866	2.06589	3.20535	-0.273734	-0.571839
	well-fed	37	11	-1.07362	1.91942	3.16328	-0.176765	-0.575781
	well-fed	38	11	-1.07212	1.9434	3.21296	-0.311928	-0.488985
	well-fed	39	11	-1.23066	1.99949	3.84459	0.0660754	-0.683135
	well-fed	40	11	-1.02409	1.88924	3.20697	-0.204948	-0.588247
	well-fed	41	11	-1.06325	2.14167	3.42139	-0.374791	-0.56407
	well-fed	42	11	-0.964902	2.00118	3.19986	-0.244556	-0.628703
	well-fed	43	11	-1.12558	1.90479	3.1556	-0.22479	-0.475621
	well-fed	44	11	-1.31303	2.14238	4.24971	-0.0648867	-0.637042
	well-fed	45	11	-1.00801	1.95379	2.6711	-0.483389	-0.382771
	well-fed	46	11	-1.34863	2.29026	4.34806	-0.239726	-0.627857
	well-fed	47	11	-1.08855	2.12939	3.60276	-0.000320671	-0.779156
	well-fed	48	11	-1.25467	2.24749	3.55413	-0.320766	-0.53053
	well-fed	49	11	-1.04309	2.11664	3.14141	-0.339974	-0.534352
	well-fed	50	11	-1.26799	2.03851	4.08391	-0.177268	-0.556144
	well-fed	51	11	-0.973161	1.86156	3.20342	-0.265335	-0.526934
	well-fed	52	11	-1.20799	2.00525	3.45946	-0.209158	-0.532603
	well-fed	53	11	-1.08707	2.16195	4.15533	-0.15099	-0.758223
	well-fed	54	11	-1.17607	2.26147	4.05715	-0.212763	-0.671637
	well-fed	55	11	-1.0692	1.95581	3.63041	-0.144964	-0.609556
	well-fed	56	11	-1.09372	2.04568	3.15675	-0.329096	-0.502693
	well-fed	57	11	-0.902045	2.0792	2.75903	-0.393618	-0.555153
	well-fed	58	11	-1.08596	1.93376	3.45016	-0.242683	-0.526165
	well-fed	59	11	-1.1183	1.87353	3.4539	-0.0723699	-0.592032
	well-fed	60	11	-0.889408	1.92759	3.04309	-0.368047	-0.545358
	well-fed	61	11	-1.22968	2.13871	3.89497	-0.120441	-0.654588
	well-fed	62	11	-1.01057	2.10617	3.17038	-0.465321	-0.485628
	well-fed	63	11	-1.15845	2.0856	3.4106	-0.291428	-0.542245
	well-fed	64	11	-1.16681	1.86522	2.8437	-0.209018	-0.423075
	well-fed	65	11	-1.05877	1.99922	3.41558	-0.204747	-0.599521
	well-fed	66	11	-1.14361	2.15734	3.30408	-0.337394	-0.519466
	well-fed	67	11	-1.01196	1.93483	3.44112	-0.14294	-0.637485
	well-fed	68	11	-1.11679	2.03885	3.64735	-0.146772	-0.627466
	well-fed	69	11	-1.03482	2.00406	3.03457	-0.282988	-0.515642
	well-fed	70	11	-1.12607	1.96058	3.24603	-0.395417	-0.447023
	well-fed	71	11	-1.07174	1.97489	3.19635	-0.400505	-0.449289
	well-fed	72	11	-1.15372	2.07406	3.52143	-0.278595	-0.540918
	well-fed	73	11	-1.17442	1.79719	3.24935	-0.122703	-0.483222
	well-fed	74	11	-1.34496	1.96396	3.4485	-0.442601	-0.27376
	well-fed	75	11	-0.958919	1.98809	3.34106	-0.167281	-0.652196
	well-fed	76	11	-1.10973	2.00211	3.30199	-0.185485	-0.574703
	well-fed	77	11	-1.05027	1.96633	3.16129	-0.237388	-0.537063
	well-fed	78	11	-1.02125	1.88605	2.68975	-0.437971	-0.371547
	well-fed	79	11	-1.20388	2.10325	3.63314	-0.244238	-0.54742
	well-fed	80	11	-1.19864	1.97292	3.68852	-0.116685	-0.575097
	well-fed	81	11	-1.0267	2.01119	3.43497	-0.223201	-0.605046
	well-fed	82	11	-1.22229	2.14634	3.7164	-0.389213	-0.459661
	well-fed	83	11	-1.09895	1.92534	3.0564	-0.212298	-0.482916
	well-fed	84	11	-1.2032	2.12525	3.60923	-0.242723	-0.571873
	well-fed	85	11	-1.18058	1.96084	3.1174	-0.426078	-0.345204
	well-fed	86	11	-1.09749	2.05543	3.09687	-0.408198	-0.454277
	well-fed	87	11	-1.19218	2.11689	3.34549	-0.391615	-0.398048
	well-fed	88	11	-1.10211	2.07875	3.77689	-0.168994	-0.645933
	well-fed	89	11	-1.2178	2.28095	4.39158	-0.138705	-0.727527
	well-fed	90	11	-0.985415	1.73617	3.01334	-0.209225	-0.520932
	well-fed	91	11	-1.08699	1.99237	3.27793	-0.254708	-0.543151
	well-fed	92	11	-0.999069	2.00224	3.16284	-0.356472	-0.535612
	well-fed	93	11	-1.12055	1.9128	3.4139	-0.21124	-0.538767
	well-fed	94	11	-1.16777	1.73726	4.13216	0.0161085	-0.656195
	well-fed	95	11	-0.971526	1.972	3.31442	-0.264371	-0.64157
	well-fed	96	11	-1.14253	1.71727	3.28315	-0.159485	-0.473476
	well-fed	97	11	-1.09661	1.9481	3.23825	-0.166173	-0.566837
	well-fed	98	11	-1.15182	2.1278	3.69592	-0.360907	-0.520375
	well-fed	99	11	-1.14626	2.03152	3.81798	-0.0125164	-0.686733
	well-fed	100	11	-1.21044	2.00679	2.87424	-0.277638	-0.426487
	well-fed	1	12	-1.21972	2.76494	3.77741	-0.298162	-0.536638
	well-fed	2	12	-0.963513	2.75159	2.75136	-0.448788	-0.456361
	well-fed	3	12	-0.93701	2.48463	2.81117	-0.261249	-0.509477
	well-fed	4	12	-1.14463	2.43364	3.54237	0.00425792	-0.665213
	well-fed	5	12	-0.941163	2.12299	3.03537	-0.226379	-0.478009
	well-fed	6	12	-1.20107	2.28841	2.21075	-0.396021	-0.173197
	well-fed	7	12	-0.861731	2.24314	2.6251	-0.278514	-0.490348
	well-fed	8	12	-1.21003	2.5465	3.20084	-0.136134	-0.538318
	well-fed	9	12	-0.846587	2.26184	2.73303	-0.298714	-0.459012
	well-fed	10	12	-1.06601	2.34887	3.18867	-0.266967	-0.437946
	well-fed	11	12	-1.20705	2.41597	3.36707	-0.290737	-0.392096
	well-fed	12	12	-1.09209	2.07712	2.4354	-0.184674	-0.295416
	well-fed	13	12	-1.20911	2.26408	3.45122	-0.102849	-0.491894
	well-fed	14	12	-1.03219	2.29937	2.90582	-0.315135	-0.415801
	well-fed	15	12	-0.929281	2.15494	2.78444	-0.0923745	-0.509485
	well-fed	16	12	-1.1443	2.38735	3.15709	-0.357422	-0.339921
	well-fed	17	12	-1.08575	2.59559	3.59245	-0.0705249	-0.667942
	well-fed	18	12	-1.06204	2.28151	2.76856	-0.289631	-0.412043
	well-fed	19	12	-1.06912	2.44494	2.92566	-0.269085	-0.441174
	well-fed	20	12	-0.990404	2.2151	3.06189	-0.175306	-0.487128
	well-fed	21	12	-1.02771	2.40719	2.80456	-0.375774	-0.372637
	well-fed	22	12	-1.0217	2.34198	2.82601	-0.242378	-0.421892
	well-fed	23	12	-1.05402	2.23298	2.85051	-0.189493	-0.467283
	well-fed	24	12	-1.12479	2.52528	2.98202	-0.404528	-0.375361
	well-fed	25	12	-1.20954	2.55132	2.9499	-0.343748	-0.360661
	well-fed	26	12	-1.04929	2.15801	2.72095	-0.212003	-0.386755
	well-fed	27	12	-1.14681	2.39725	3.0639	-0.356986	-0.347208
	well-fed	28	12	-1.1683	2.49242	3.27981	-0.284769	-0.449742
	well-fed	29	12	-1.08335	2.31052	3.05912	-0.176914	-0.434658
	well-fed	30	12	-1.129	2.46629	3.35947	-0.261197	-0.459034
	well-fed	31	12	-1.12005	2.41768	2.95776	-0.292894	-0.400754
	well-fed	32	12	-1.06814	2.42204	2.85656	-0.358576	-0.370776
	well-fed	33	12	-0.996852	2.13673	2.45867	-0.207461	-0.368335
	well-fed	34	12	-0.870169	2.42232	2.95477	-0.180801	-0.604115
	well-fed	35	12	-1.08817	2.45507	2.66049	-0.220401	-0.487188
	well-fed	36	12	-1.1847	2.46871	2.49955	-0.428493	-0.226559
	well-fed	37	12	-1.18247	2.1419	2.69945	-0.0775503	-0.412511
	well-fed	38	12	-1.26312	2.37051	3.14726	-0.295064	-0.318984
	well-fed	39	12	-1.05426	2.19394	3.06954	-0.0392757	-0.534816
	well-fed	40	12	-0.998727	2.3297	2.76739	-0.251223	-0.44498
	well-fed	41	12	-1.1022	2.55788	3.09702	-0.478668	-0.35327
	well-fed	42	12	-1.07321	2.48071	2.59675	-0.425777	-0.347446
	well-fed	43	12	-1.0755	2.33368	2.98251	-0.178434	-0.454703
	well-fed	44	12	-1.16457	2.35704	3.22238	-0.124542	-0.448383
	well-fed	45	12	-1.05589	2.38381	2.61162	-0.427055	-0.293061
	well-fed	46	12	-1.11766	2.47292	3.77633	-0.192181	-0.602938
	well-fed	47	12	-0.782758	2.16293	2.81591	0.0505364	-0.661497
	well-fed	48	12	-0.988904	2.32376	2.82059	-0.243917	-0.455215
	well-fed	49	12	-1.02368	2.50085	2.8062	-0.424145	-0.360779
	well-fed	50	12	-1.19895	2.40135	2.96565	-0.309657	-0.347379
	well-fed	51	12	-0.900411	2.43756	2.79036	-0.387486	-0.445267
	well-fed	52	12	-1.08168	2.22545	2.51879	-0.296534	-0.32021
	well-fed	53	12	-0.934433	2.29692	2.94493	-0.182497	-0.531805
	well-fed	54	12	-1.04468	2.64086	3.40452	-0.305912	-0.547231
	well-fed	55	12	-1.14673	2.38761	2.91668	-0.214779	-0.407069
	well-fed	56	12	-1.0792	2.36848	2.75491	-0.298882	-0.344339
	well-fed	57	12	-0.941213	2.52219	2.64744	-0.312698	-0.489023
	well-fed	58	12	-1.00544	2.42446	2.46617	-0.418408	-0.286293
	well-fed	59	12	-1.00029	2.13871	2.82463	-0.0685348	-0.504707
	well-fed	60	12	-0.953271	2.34386	2.51754	-0.440916	-0.360053
	well-fed	61	12	-1.1435	2.25439	3.42295	-0.143423	-0.472023
	well-fed	62	12	-0.957522	2.34132	2.33727	-0.466579	-0.299154
	well-fed	63	12	-1.05105	2.31634	2.67902	-0.274387	-0.408983
	well-fed	64	12	-1.06275	2.21876	2.5628	-0.153512	-0.398036
	well-fed	65	12	-1.11609	2.1006	2.51659	-0.244449	-0.256359
	well-fed	66	12	-1.01556	2.33999	2.76903	-0.273148	-0.433785
	well-fed	67	12	-1.10614	2.28022	3.01872	-0.145985	-0.453394
	well-fed	68	12	-1.07395	2.42824	3.43647	-0.121857	-0.571436
	well-fed	69	12	-1.06377	2.44627	2.89572	-0.353047	-0.352245
	well-fed	70	12	-1.11838	2.408	3.15656	-0.260874	-0.461002
	well-fed	71	12	-1.22948	2.36503	3.25361	-0.287826	-0.374285
	well-fed	72	12	-1.10088	2.42194	2.97436	-0.28778	-0.394745
	well-fed	73	12	-1.03835	2.04191	2.79732	-0.0662346	-0.433415
	well-fed	74	12	-1.05012	2.25881	2.70523	-0.273348	-0.363756
	well-fed	75	12	-1.03968	2.27897	3.15336	-0.113505	-0.529664
	well-fed	76	12	-0.995433	2.49051	3.25234	-0.129019	-0.639578
	well-fed	77	12	-0.984479	2.23133	2.74313	-0.179062	-0.446849
	well-fed	78	12	-0.828846	2.48673	2.16889	-0.44518	-0.428885
	well-fed	79	12	-1.05975	2.36186	3.08028	-0.26772	-0.4744
	well-fed	80	12	-1.1069	2.6195	3.1967	-0.282721	-0.451729
	well-fed	81	12	-1.02072	2.47133	2.97402	-0.23995	-0.48571
	well-fed	82	12	-1.05226	2.45388	2.98754	-0.390534	-0.358656
	well-fed	83	12	-0.986677	2.31927	2.63513	-0.236461	-0.407416
	well-fed	84	12	-1.18668	2.56491	2.80364	-0.330419	-0.385553
	well-fed	85	12	-1.03691	2.39926	2.67091	-0.320225	-0.345872
	well-fed	86	12	-1.05388	2.55927	3.31362	-0.367665	-0.477195
	well-fed	87	12	-1.09923	2.59159	2.31899	-0.403982	-0.245277
	well-fed	88	12	-0.957664	2.65207	3.04386	-0.331691	-0.549618
	well-fed	89	12	-1.10643	2.43179	3.5252	-0.134685	-0.561325
	well-fed	90	12	-1.04202	2.18432	2.7694	-0.136823	-0.468566
	well-fed	91	12	-1.1807	2.27019	3.0804	-0.227323	-0.384638
	well-fed	92	12	-0.897962	2.26891	2.55189	-0.347044	-0.413179
	well-fed	93	12	-1.24035	2.18343	2.74748	-0.244753	-0.267976
	well-fed	94	12	-1.06722	2.21593	3.31011	-0.0878554	-0.547577
	well-fed	95	12	-0.952733	2.18792	2.80828	-0.249555	-0.44936
	well-fed	96	12	-1.29729	2.27937	2.63414	-0.356648	-0.185321
	well-fed	97	12	-0.971272	2.10727	2.47617	-0.130228	-0.440808
	well-fed	98	12	-1.03445	2.18602	3.11222	-0.119209	-0.489605
	well-fed	99	12	-1.08422	2.38131	3.22204	-0.0249519	-0.592228
	well-fed	100	12	-1.25023	2.43667	3.32188	-0.178397	-0.433306
	well-fed	1	13	-1.4891	2.55717	2.46193	-0.0920204	-0.34382
	well-fed	2	13	-1.53024	2.49371	2.30743	-0.119703	-0.262197
	well-fed	3	13	-1.36283	2.48025	2.26898	-0.0239348	-0.376967
	well-fed	4	13	-1.3312	2.32421	2.61935	0.246042	-0.58091
	well-fed	5	13	-1.42585	2.25343	2.58078	-0.120588	-0.31799
	well-fed	6	13	-1.58091	2.32596	2.22508	-0.0468092	-0.225393
	well-fed	7	13	-1.33987	2.5604	2.46437	-0.0576553	-0.46303
	well-fed	8	13	-1.14868	2.52331	3.0102	0.123732	-0.765018
	well-fed	9	13	-1.43564	2.3516	1.42455	-0.212849	-0.0864932
	well-fed	10	13	-1.51529	2.52299	2.61218	-0.161687	-0.281068
	well-fed	11	13	-1.34704	2.40717	2.53061	0.036326	-0.483922
	well-fed	12	13	-1.55985	2.29329	1.96535	-0.0926439	-0.109628
	well-fed	13	13	-1.31104	2.31632	3.07991	0.204014	-0.60371
	well-fed	14	13	-1.33789	2.42693	2.56743	-0.0681114	-0.388248
	well-fed	15	13	-1.36464	2.33907	2.2226	0.0397275	-0.3728
	well-fed	16	13	-1.51418	2.26711	2.59388	0.0297167	-0.339152
	well-fed	17	13	-1.44462	2.67399	2.58327	0.00116766	-0.445367
	well-fed	18	13	-1.32731	2.31393	2.42357	-0.037201	-0.412566
	well-fed	19	13	-1.48144	2.40442	2.37083	-0.00038237	-0.329231
	well-fed	20	13	-1.3334	2.19213	2.09426	0.00359228	-0.338312
	well-fed	21	13	-1.27775	2.42918	2.30469	-0.0675199	-0.423427
	well-fed	22	13	-1.33813	2.50906	2.44437	-0.073587	-0.396412
	well-fed	23	13	-1.2671	2.30804	2.50148	0.0466832	-0.491756
	well-fed	24	13	-1.4707	2.49964	2.55892	-0.106045	-0.350712
	well-fed	25	13	-1.51743	2.35507	2.29144	-0.0654246	-0.24477
	well-fed	26	13	-1.40102	2.22711	2.37695	-0.0436376	-0.322863
	well-fed	27	13	-1.49487	2.48771	2.24983	-0.127511	-0.248609
	well-fed	28	13	-1.45134	2.29546	2.43999	0.0571571	-0.363621
	well-fed	29	13	-1.59189	2.4044	2.51854	0.0354514	-0.292108
	well-fed	30	13	-1.69361	2.60494	2.32379	-0.179246	-0.116041
	well-fed	31	13	-1.50883	2.52311	2.14142	-0.259803	-0.16204
	well-fed	32	13	-1.30478	2.28325	2.30016	-0.0825175	-0.335185
	well-fed	33	13	-1.37466	2.45674	2.31498	-0.00965773	-0.370041
	well-fed	34	13	-1.24499	2.33214	2.00114	0.0876692	-0.475437
	well-fed	35	13	-1.44655	2.53507	2.16173	-0.0415419	-0.358808
	well-fed	36	13	-1.26481	2.36672	2.17308	-0.0525303	-0.385842
	well-fed	37	13	-1.51583	2.35561	2.00935	0.0435662	-0.291168
	well-fed	38	13	-1.45074	2.33141	2.3752	-0.0828364	-0.276376
	well-fed	39	13	-1.46634	2.23731	2.3842	0.0888795	-0.345555
	well-fed	40	13	-1.36474	2.43909	2.65847	0.0561433	-0.474208
	well-fed	41	13	-1.29573	2.55285	2.67967	-0.0541666	-0.480007
	well-fed	42	13	-1.40664	2.31531	2.22431	-0.0583108	-0.338572
	well-fed	43	13	-1.3771	2.24427	2.6685	0.114638	-0.459425
	well-fed	44	13	-1.53463	2.36004	2.69661	0.131977	-0.35871
	well-fed	45	13	-1.47755	2.49992	2.56414	-0.0784788	-0.330814
	well-fed	46	13	-1.60783	2.49536	2.78832	-0.0786018	-0.346879
	well-fed	47	13	-1.43404	2.50764	2.40638	0.143141	-0.499149
	well-fed	48	13	-1.62213	2.69897	2.33437	-0.0977201	-0.27417
	well-fed	49	13	-1.21538	2.33616	2.10104	-0.0891816	-0.377935
	well-fed	50	13	-1.57814	2.36019	2.27666	-0.0325471	-0.219097
	well-fed	51	13	-1.38321	2.31615	1.96521	-0.16421	-0.197006
	well-fed	52	13	-1.58313	2.31126	2.32894	-0.0515083	-0.220561
	well-fed	53	13	-1.22134	2.26117	3.05684	0.205993	-0.659455
	well-fed	54	13	-1.21539	2.61171	2.48665	-0.097261	-0.525206
	well-fed	55	13	-1.22064	2.27949	2.30793	0.120568	-0.509714
	well-fed	56	13	-1.55293	2.64921	2.49243	-0.122268	-0.269642
	well-fed	57	13	-1.16511	2.45723	2.44404	0.0814235	-0.564927
	well-fed	58	13	-1.53616	2.48685	2.22651	-0.224198	-0.136457
	well-fed	59	13	-1.45296	2.27549	2.44081	0.0852657	-0.355311
	well-fed	60	13	-1.41308	2.4135	2.18981	-0.170519	-0.270456
	well-fed	61	13	-1.52111	2.46986	2.14221	-0.0574957	-0.271894
	well-fed	62	13	-1.32439	2.37641	2.06812	-0.246006	-0.267292
	well-fed	63	13	-1.27415	2.27308	2.48994	0.0481357	-0.468902
	well-fed	64	13	-1.39087	2.30013	2.4816	0.0984351	-0.414998
	well-fed	65	13	-1.3216	2.30552	2.06424	0.0407896	-0.355636
	well-fed	66	13	-1.34061	2.34098	2.56542	0.0657475	-0.461322
	well-fed	67	13	-1.3514	2.39391	2.3539	0.0292211	-0.395177
	well-fed	68	13	-1.3724	2.44906	3.05358	0.163817	-0.559928
	well-fed	69	13	-1.35229	2.48802	2.67752	0.0292687	-0.500656
	well-fed	70	13	-1.49385	2.53559	2.27766	-0.164745	-0.256936
	well-fed	71	13	-1.36392	2.30095	2.36625	-0.0545383	-0.342069
	well-fed	72	13	-1.40433	2.30355	2.05474	-0.0336196	-0.303589
	well-fed	73	13	-1.51052	2.31971	2.14405	0.00457874	-0.237894
	well-fed	74	13	-1.59385	2.36277	2.48577	-0.162438	-0.145094
	well-fed	75	13	-1.23406	2.32162	2.22857	0.0682137	-0.460682
	well-fed	76	13	-1.43248	2.32983	2.37957	0.0903615	-0.373271
	well-fed	77	13	-1.16729	2.32777	1.98316	0.191711	-0.538001
	well-fed	78	13	-1.41349	2.22787	2.1049	-0.223586	-0.165679
	well-fed	79	13	-1.38575	2.39422	2.39774	-0.194369	-0.294584
	well-fed	80	13	-1.55008	2.46054	2.46745	-0.0645388	-0.250623
	well-fed	81	13	-1.24601	2.39166	2.48762	0.0496624	-0.504858
	well-fed	82	13	-1.36352	2.57206	2.44994	-0.0609368	-0.420836
	well-fed	83	13	-1.3411	2.32029	2.22004	0.033161	-0.348521
	well-fed	84	13	-1.35433	2.36822	2.58408	0.0650708	-0.482805
	well-fed	85	13	-1.52741	2.29579	1.98027	-0.0592421	-0.141099
	well-fed	86	13	-1.64375	2.4129	2.22742	-0.158249	-0.134134
	well-fed	87	13	-1.40469	2.53395	2.14705	-0.101813	-0.293766
	well-fed	88	13	-1.39347	2.596	2.08104	-0.110211	-0.299005
	well-fed	89	13	-1.46503	2.3911	2.5384	0.0829265	-0.413978
	well-fed	90	13	-1.29883	2.3045	2.44526	0.0542338	-0.471208
	well-fed	91	13	-1.27347	2.33924	2.29673	0.0031864	-0.445971
	well-fed	92	13	-1.3785	2.213	2.0699	0.0193392	-0.323091
	well-fed	93	13	-1.36714	2.18469	2.44926	0.0487838	-0.378797
	well-fed	94	13	-1.32999	2.12879	2.56437	0.154746	-0.470201
	well-fed	95	13	-1.34669	2.28721	1.94441	-0.0649072	-0.294673
	well-fed	96	13	-1.64517	2.35892	2.07729	-0.120618	-0.0804581
	well-fed	97	13	-1.24153	2.39747	2.40376	0.0274121	-0.467371
	well-fed	98	13	-1.45891	2.21693	2.65327	0.0378611	-0.33256
	well-fed	99	13	-1.24224	2.4025	2.49699	0.159199	-0.564784
	well-fed	100	13	-1.48564	2.30297	2.40245	0.0651379	-0.347914
	well-fed	1	14	-0.850068	1.80855	1.62005	-0.133393	-0.446872
	well-fed	2	14	-0.56194	1.85401	1.6328	-0.29706	-0.532353
	well-fed	3	14	-0.775818	1.79664	1.28838	-0.183786	-0.395665
	well-fed	4	14	-0.721164	1.60578	1.89909	0.16973	-0.657405
	well-fed	5	14	-0.570325	1.50482	1.83182	-0.0468306	-0.577232
	well-fed	6	14	-0.977183	1.81173	1.33781	-0.171826	-0.319765
	well-fed	7	14	-0.384378	1.4683	1.67239	-0.0173795	-0.686029
	well-fed	8	14	-1.18035	2.00987	2.12357	-0.0679301	-0.432998
	well-fed	9	14	-0.611104	1.54678	0.855724	-0.0600355	-0.421925
	well-fed	10	14	-0.763359	1.71618	1.78646	-0.120811	-0.478924
	well-fed	11	14	-0.634122	1.59123	1.99212	0.103514	-0.655842
	well-fed	12	14	-0.802353	1.67733	1.70709	-0.0938358	-0.454016
	well-fed	13	14	-0.753661	1.63122	2.31048	0.0448636	-0.664131
	well-fed	14	14	-0.406758	1.51848	1.9238	0.00220019	-0.691376
	well-fed	15	14	-0.71624	1.61803	1.58154	-0.0389672	-0.484347
	well-fed	16	14	-0.604059	1.64714	1.91146	-0.0514128	-0.583088
	well-fed	17	14	-0.895992	1.82657	1.78191	-0.0671252	-0.462357
	well-fed	18	14	-0.511287	1.60902	1.75521	-0.0191541	-0.667488
	well-fed	19	14	-0.826304	1.69355	1.45522	-0.0789763	-0.391541
	well-fed	20	14	-0.738716	1.37692	1.50252	0.0504104	-0.456169
	well-fed	21	14	-0.573053	1.64077	1.61373	-0.0940633	-0.561385
	well-fed	22	14	-0.590763	1.51571	2.0394	0.17622	-0.701773
	well-fed	23	14	-0.735704	1.56721	1.87302	0.0946078	-0.587771
	well-fed	24	14	-0.729782	1.93539	1.71098	-0.294974	-0.490432
	well-fed	25	14	-0.712877	1.82136	1.4379	-0.288607	-0.428932
	well-fed	26	14	-0.545891	1.50848	1.97889	0.0868734	-0.66314
	well-fed	27	14	-0.539061	1.73479	1.63784	-0.252344	-0.53528
	well-fed	28	14	-0.821872	1.71507	1.98551	-0.0303759	-0.550279
	well-fed	29	14	-0.737395	1.51973	1.49406	0.0115911	-0.458585
	well-fed	30	14	-0.898237	1.91616	1.58364	-0.343967	-0.32145
	well-fed	31	14	-0.703483	1.7405	1.78964	-0.103298	-0.532935
	well-fed	32	14	-0.695813	1.57967	1.5287	0.01886	-0.506467
	well-fed	33	14	-0.48307	1.48451	1.81869	0.0692955	-0.662459
	well-fed	34	14	-0.586492	1.57511	1.22002	-0.063437	-0.535113
	well-fed	35	14	-0.808893	1.90615	1.03646	-0.328204	-0.358767
	well-fed	36	14	-0.922513	1.8758	1.14618	-0.258745	-0.278884
	well-fed	37	14	-0.779885	1.60354	1.26891	-0.0320667	-0.465892
	well-fed	38	14	-0.801989	1.72659	1.36641	-0.133695	-0.398041
	well-fed	39	14	-0.701589	1.65702	1.56974	-0.042197	-0.511978
	well-fed	40	14	-0.558415	1.63899	1.62821	-0.097399	-0.562448
	well-fed	41	14	-0.740644	1.7719	1.68011	-0.174686	-0.478666
	well-fed	42	14	-1.01376	1.85313	1.08855	-0.2364	-0.236502
	well-fed	43	14	-0.67933	1.65621	1.8172	-0.0495323	-0.555607
	well-fed	44	14	-0.815789	1.65049	1.86128	0.0231215	-0.494258
	well-fed	45	14	-0.715175	1.74025	1.36601	-0.312121	-0.364597
	well-fed	46	14	-0.65691	1.62035	2.17696	0.00956036	-0.642684
	well-fed	47	14	-0.658903	1.61641	1.48358	0.00169473	-0.540604
	well-fed	48	14	-0.958558	1.78588	1.52196	-0.174717	-0.337131
	well-fed	49	14	-0.536938	1.66887	1.61053	-0.110995	-0.556282
	well-fed	50	14	-0.872234	1.76878	1.64359	-0.109826	-0.406554
	well-fed	51	14	-0.573133	1.69495	1.3255	-0.248105	-0.451239
	well-fed	52	14	-0.850566	1.73337	1.39749	-0.159573	-0.369718
	well-fed	53	14	-0.751175	1.60672	1.64161	0.0388128	-0.529739
	well-fed	54	14	-0.591496	1.72572	1.9056	-0.0854141	-0.60404
	well-fed	55	14	-0.472666	1.53798	1.79726	0.14536	-0.714154
	well-fed	56	14	-0.817329	1.69972	1.89987	-0.0545388	-0.481002
	well-fed	57	14	-0.520403	1.73707	1.69243	-0.0490279	-0.647506
	well-fed	58	14	-0.493927	1.66406	1.19819	-0.275182	-0.450348
	well-fed	59	14	-0.697254	1.64255	1.64272	-0.0634798	-0.496609
	well-fed	60	14	-0.788017	1.93016	1.31435	-0.372219	-0.340383
	well-fed	61	14	-0.836099	1.61985	1.72966	0.0621248	-0.484744
	well-fed	62	14	-0.742466	1.78753	1.29172	-0.236395	-0.382952
	well-fed	63	14	-0.532636	1.53725	1.77304	0.0527855	-0.640895
	well-fed	64	14	-0.522877	1.45888	1.56094	0.0302775	-0.566985
	well-fed	65	14	-0.827282	1.69751	1.19839	-0.176511	-0.326038
	well-fed	66	14	-0.532866	1.4857	1.80925	0.0784864	-0.629454
	well-fed	67	14	-0.720885	1.78678	1.57686	-0.0841333	-0.516067
	well-fed	68	14	-0.414744	1.37902	1.93247	0.0918322	-0.677011
	well-fed	69	14	-0.691631	1.65875	1.71845	-0.0938171	-0.527612
	well-fed	70	14	-0.911867	1.78114	1.48582	-0.154335	-0.382185
	well-fed	71	14	-0.523419	1.50416	1.61144	-0.0912897	-0.569225
	well-fed	72	14	-0.775776	1.53222	1.35516	0.0176565	-0.420902
	well-fed	73	14	-0.812627	1.6264	1.41855	-0.089978	-0.390297
	well-fed	74	14	-0.905043	1.85553	1.46575	-0.161073	-0.364564
	well-fed	75	14	-0.424221	1.58107	1.71356	-0.0182911	-0.674593
	well-fed	76	14	-0.695204	1.57331	1.4788	0.127606	-0.577239
	well-fed	77	14	-0.538997	1.53215	1.51493	0.109398	-0.650514
	well-fed	78	14	-0.77622	1.56004	1.19151	-0.0778053	-0.354706
	well-fed	79	14	-0.743787	1.77795	1.59811	-0.170464	-0.452695
	well-fed	80	14	-0.824765	1.91548	1.7413	-0.154057	-0.459321
	well-fed	81	14	-0.558209	1.6674	1.89224	-0.0678207	-0.639479
	well-fed	82	14	-0.634569	1.77594	1.73489	-0.148515	-0.525455
	well-fed	83	14	-0.518949	1.41522	1.46911	0.0409842	-0.537166
	well-fed	84	14	-0.746251	1.94668	1.67962	-0.272798	-0.489042
	well-fed	85	14	-0.912035	1.77011	1.29879	-0.0948922	-0.325437
	well-fed	86	14	-0.635402	1.75006	1.42153	-0.228954	-0.460648
	well-fed	87	14	-0.534692	1.73509	1.61361	-0.140424	-0.533067
	well-fed	88	14	-0.771178	1.80853	1.32632	-0.170236	-0.408452
	well-fed	89	14	-0.808083	1.56508	1.81893	0.0655754	-0.497854
	well-fed	90	14	-0.5856	1.54093	1.66116	0.0512611	-0.663057
	well-fed	91	14	-0.650003	1.71113	1.69011	-0.054436	-0.592067
	well-fed	92	14	-0.724535	1.6451	1.30215	-0.16558	-0.412801
	well-fed	93	14	-0.680609	1.696	2.04174	-0.0286018	-0.631257
	well-fed	94	14	-0.767623	1.60472	1.91759	0.0690285	-0.595214
	well-fed	95	14	-0.719806	1.51675	1.41406	0.0481597	-0.518821
	well-fed	96	14	-0.794296	1.54925	1.36416	-0.0961207	-0.372109
	well-fed	97	14	-0.656265	1.72147	1.79398	-0.00542985	-0.625002
	well-fed	98	14	-0.782127	1.59721	1.84941	0.0505502	-0.506375
	well-fed	99	14	-0.69771	1.66616	1.63874	0.00122018	-0.567449
	well-fed	100	14	-0.698322	1.81363	1.75062	-0.0837198	-0.548136
	well-fed	1	15	-1.0691	2.16342	2.43893	-0.0357187	-0.587627
	well-fed	2	15	-0.884716	2.37702	2.45324	-0.242874	-0.606179
	well-fed	3	15	-0.958357	2.15517	2.18679	-0.147257	-0.516863
	well-fed	4	15	-1.05266	2.31676	2.97932	0.165744	-0.820781
	well-fed	5	15	-0.995446	2.12092	2.82846	-0.118733	-0.613194
	well-fed	6	15	-0.991988	2.1848	2.04973	-0.174925	-0.494784
	well-fed	7	15	-0.841488	1.94651	2.34626	-0.0140338	-0.667237
	well-fed	8	15	-1.05515	2.38174	2.81168	-0.0124677	-0.745504
	well-fed	9	15	-0.973297	2.05545	1.68475	-0.135631	-0.424018
	well-fed	10	15	-1.11317	2.33457	2.72118	-0.203346	-0.500538
	well-fed	11	15	-1.02574	2.16869	2.85935	0.0425096	-0.670483
	well-fed	12	15	-1.02178	2.10533	2.5643	-0.0672512	-0.584946
	well-fed	13	15	-0.980361	2.19071	3.3728	0.0473858	-0.781417
	well-fed	14	15	-0.94384	2.06158	2.89071	-0.000900642	-0.674074
	well-fed	15	15	-1.05716	2.09862	2.59803	-0.00647994	-0.579068
	well-fed	16	15	-0.957725	2.20098	2.77187	-0.0931398	-0.631735
	well-fed	17	15	-1.10998	2.19787	2.4389	-0.0730422	-0.507635
	well-fed	18	15	-0.95697	2.21787	2.69401	-0.0519628	-0.678867
	well-fed	19	15	-1.17516	2.18561	2.36692	-0.128243	-0.406769
	well-fed	20	15	-1.16897	1.84986	2.51274	0.0483534	-0.461288
	well-fed	21	15	-0.924298	2.20449	2.72475	-0.0442165	-0.689907
	well-fed	22	15	-1.0015	2.20063	2.86541	0.0465406	-0.711752
	well-fed	23	15	-1.03574	2.07215	3.0247	0.120634	-0.700361
	well-fed	24	15	-1.0789	2.37284	2.69908	-0.221497	-0.564003
	well-fed	25	15	-1.05623	2.20984	2.37268	-0.255735	-0.469185
	well-fed	26	15	-0.971429	2.10705	2.92342	0.0936989	-0.706159
	well-fed	27	15	-0.90048	2.29956	2.61445	-0.233941	-0.61266
	well-fed	28	15	-1.12677	2.257	2.91354	-0.0692356	-0.594896
	well-fed	29	15	-1.12453	2.12937	2.78834	0.0832382	-0.66345
	well-fed	30	15	-1.17088	2.19898	2.3375	-0.299363	-0.350308
	well-fed	31	15	-1.05734	2.16693	2.93323	-0.0855775	-0.585445
	well-fed	32	15	-1.03336	2.04247	2.69069	0.0218729	-0.574892
	well-fed	33	15	-0.958431	2.03634	2.57488	0.0328013	-0.636238
	well-fed	34	15	-0.969861	2.00953	2.12478	-0.0466393	-0.563035
	well-fed	35	15	-0.991045	2.186	1.88297	-0.172034	-0.539712
	well-fed	36	15	-1.08498	2.18047	2.16701	-0.216438	-0.416986
	well-fed	37	15	-0.975813	2.0183	2.04937	-0.06949	-0.540404
	well-fed	38	15	-1.05932	2.08051	2.44903	-0.0988435	-0.505101
	well-fed	39	15	-1.07665	2.16316	2.76086	0.135762	-0.730333
	well-fed	40	15	-0.950057	2.13627	2.7043	-0.0429912	-0.661364
	well-fed	41	15	-0.88041	2.05566	2.5806	-0.0842374	-0.640911
	well-fed	42	15	-1.22794	2.19623	2.47839	-0.118806	-0.438667
	well-fed	43	15	-0.90357	2.17119	2.61117	-0.0617472	-0.662958
	well-fed	44	15	-1.02336	1.9825	2.72053	0.117068	-0.643219
	well-fed	45	15	-1.00826	2.1265	2.34068	-0.207134	-0.463711
	well-fed	46	15	-1.009	2.23022	3.17452	0.10952	-0.842561
	well-fed	47	15	-0.97381	2.12398	2.20448	-0.046563	-0.586245
	well-fed	48	15	-1.20822	2.10433	2.24409	-0.176704	-0.362493
	well-fed	49	15	-0.962241	2.35819	2.77604	-0.077828	-0.662176
	well-fed	50	15	-1.08822	2.10339	2.43142	-0.0575067	-0.49974
	well-fed	51	15	-0.899112	2.05821	2.22137	-0.103753	-0.549353
	well-fed	52	15	-1.07141	2.07388	2.62484	-0.0556503	-0.546335
	well-fed	53	15	-1.07223	2.11105	3.03472	0.0416333	-0.666225
	well-fed	54	15	-0.938147	2.19007	2.87566	0.0419123	-0.736957
	well-fed	55	15	-0.91893	2.17466	2.73508	0.130673	-0.745522
	well-fed	56	15	-1.0836	2.20062	2.87086	-0.05963	-0.584802
	well-fed	57	15	-0.816668	2.2646	2.32433	-0.0147639	-0.744062
	well-fed	58	15	-0.958315	2.20336	2.52864	-0.206578	-0.514017
	well-fed	59	15	-1.00049	2.116	2.43225	-0.0941893	-0.539924
	well-fed	60	15	-0.92444	2.07322	2.19865	-0.249937	-0.483486
	well-fed	61	15	-1.14278	2.22652	2.77608	0.10135	-0.650713
	well-fed	62	15	-0.921438	2.0575	2.10119	-0.125952	-0.520438
	well-fed	63	15	-0.983738	2.22042	2.60408	0.071967	-0.729709
	well-fed	64	15	-0.987699	2.05842	2.72213	0.116956	-0.740234
	well-fed	65	15	-1.08431	2.12866	2.22953	-0.153536	-0.436099
	well-fed	66	15	-1.00569	2.11609	2.83833	0.0581455	-0.667026
	well-fed	67	15	-0.956906	2.19146	2.42374	-0.112594	-0.564374
	well-fed	68	15	-0.913044	2.11462	2.92672	0.0131401	-0.683505
	well-fed	69	15	-1.01901	2.14024	2.89218	-0.0561535	-0.641808
	well-fed	70	15	-1.11394	2.03687	2.31996	-0.0831967	-0.484363
	well-fed	71	15	-0.902102	2.02214	2.75041	-0.035562	-0.662456
	well-fed	72	15	-1.03684	1.97204	2.23238	0.0264296	-0.505341
	well-fed	73	15	-1.10279	2.0693	2.39449	-0.0486239	-0.487514
	well-fed	74	15	-1.18828	2.20704	2.48213	-0.175327	-0.394311
	well-fed	75	15	-0.902981	2.18969	2.68306	-0.0580704	-0.678282
	well-fed	76	15	-0.969885	2.07553	2.13576	0.000123169	-0.552377
	well-fed	77	15	-0.907228	2.11478	2.45369	0.0608974	-0.705674
	well-fed	78	15	-1.16303	2.00191	2.35671	-0.0388152	-0.41582
	well-fed	79	15	-1.17716	2.2969	2.96637	-0.0386793	-0.623656
	well-fed	80	15	-1.07693	2.33911	2.9515	-0.0982421	-0.588439
	well-fed	81	15	-0.874239	2.19727	2.87892	-0.0403292	-0.747366
	well-fed	82	15	-0.898707	2.22204	2.417	-0.0984553	-0.630775
	well-fed	83	15	-0.979774	2.12453	2.32284	-0.0959741	-0.50874
	well-fed	84	15	-1.00744	2.40102	2.70407	-0.171499	-0.668021
	well-fed	85	15	-1.1392	2.11293	2.40393	-0.0718404	-0.460395
	well-fed	86	15	-1.00064	2.17449	2.31181	-0.164492	-0.499804
	well-fed	87	15	-0.908009	2.24834	2.42151	-0.128229	-0.602072
	well-fed	88	15	-1.00769	2.12119	2.32671	-0.0499711	-0.546959
	well-fed	89	15	-1.09037	2.02077	2.63484	0.0949731	-0.602792
	well-fed	90	15	-0.823522	1.98252	2.69742	0.0295742	-0.758233
	well-fed	91	15	-0.946248	2.20142	2.66406	-0.062421	-0.649394
	well-fed	92	15	-1.03832	1.94454	2.17419	-0.185097	-0.409287
	well-fed	93	15	-0.971038	2.25512	3.00396	-0.0375407	-0.708796
	well-fed	94	15	-1.05373	2.1127	3.17309	0.127137	-0.732939
	well-fed	95	15	-0.95752	1.89857	2.22256	0.0483449	-0.593998
	well-fed	96	15	-1.0682	1.96749	2.60699	-0.00409989	-0.535956
	well-fed	97	15	-1.00551	2.30265	3.15979	0.0361449	-0.744312
	well-fed	98	15	-0.941812	1.9859	2.42352	0.00899485	-0.582736
	well-fed	99	15	-0.892031	2.05703	2.79183	0.061151	-0.734155
	well-fed	100	15	-1.06233	2.41776	2.63234	-0.0516975	-0.644188
	well-fed	1	16	-1.75175	2.24332	4.41658	0.185439	-0.563643
	well-fed	2	16	-1.66386	2.22422	4.04055	-0.0544657	-0.428165
	well-fed	3	16	-1.64697	2.41947	3.70531	-0.0995335	-0.410141
	well-fed	4	16	-1.81498	2.14826	4.03321	0.240531	-0.490367
	well-fed	5	16	-1.78958	2.2949	4.35925	-0.114622	-0.417333
	well-fed	6	16	-2.00255	2.19237	4.19525	0.137704	-0.363531
	well-fed	7	16	-1.46879	2.27715	3.62204	-0.0822758	-0.509601
	well-fed	8	16	-1.72762	2.534	3.19754	-0.0108019	-0.488428
	well-fed	9	16	-1.55007	2.20363	3.64021	-0.0118105	-0.452978
	well-fed	10	16	-1.80806	2.3929	3.86503	-0.12039	-0.340316
	well-fed	11	16	-1.71281	2.39781	4.13666	0.00724004	-0.48995
	well-fed	12	16	-1.72408	2.2122	4.17839	0.0921695	-0.465078
	well-fed	13	16	-1.72635	2.2651	4.5706	0.141759	-0.596515
	well-fed	14	16	-1.57079	2.32581	3.56675	-0.157665	-0.39919
	well-fed	15	16	-1.64405	2.16844	4.09098	0.144129	-0.514542
	well-fed	16	16	-1.87347	2.12118	4.13246	0.121965	-0.388039
	well-fed	17	16	-1.82396	2.42299	4.34779	0.125366	-0.530041
	well-fed	18	16	-1.73068	2.34305	3.65351	-0.117596	-0.376149
	well-fed	19	16	-1.78945	2.34848	3.99453	0.0611213	-0.423871
	well-fed	20	16	-1.87431	1.99917	3.89475	0.0603729	-0.312686
	well-fed	21	16	-1.68562	2.39507	3.72297	-0.140989	-0.382568
	well-fed	22	16	-1.63677	2.28916	3.68123	-0.0643793	-0.37547
	well-fed	23	16	-1.83809	2.27792	4.0295	0.0198647	-0.411158
	well-fed	24	16	-1.7075	2.32257	4.0314	-0.0296016	-0.43597
	well-fed	25	16	-1.74354	2.12305	3.8594	0.0731699	-0.415944
	well-fed	26	16	-1.61308	2.28568	3.68893	-0.108579	-0.439911
	well-fed	27	16	-1.66721	2.16199	3.96975	0.118939	-0.48834
	well-fed	28	16	-1.88986	2.15673	4.50248	0.206773	-0.492509
	well-fed	29	16	-1.6398	1.94335	4.22495	0.235651	-0.542324
	well-fed	30	16	-1.85468	2.27525	4.44486	0.136378	-0.477596
	well-fed	31	16	-1.80499	2.48525	4.08151	0.0859689	-0.515261
	well-fed	32	16	-1.57224	2.28212	3.35328	-0.0867903	-0.400285
	well-fed	33	16	-1.67333	2.35102	3.67718	-0.0253783	-0.398405
	well-fed	34	16	-1.48887	2.05514	3.7312	0.0582936	-0.52137
	well-fed	35	16	-1.7217	2.21787	3.84275	0.085254	-0.471194
	well-fed	36	16	-1.81286	2.39525	3.87824	0.0573415	-0.426796
	well-fed	37	16	-1.74251	2.1818	3.57608	0.118115	-0.433299
	well-fed	38	16	-1.83171	2.33869	4.06307	0.00325773	-0.415164
	well-fed	39	16	-1.65996	2.15521	3.82037	0.0916759	-0.456811
	well-fed	40	16	-1.64889	2.37752	3.69799	-0.0355204	-0.451522
	well-fed	41	16	-1.75841	2.38212	4.09328	-0.0555883	-0.402389
	well-fed	42	16	-1.58787	2.09146	2.87253	-0.0998176	-0.287285
	well-fed	43	16	-1.5163	2.06159	4.04913	0.0831617	-0.519494
	well-fed	44	16	-1.49982	2.21155	4.45319	0.18924	-0.640716
	well-fed	45	16	-1.67407	2.22987	3.56627	-0.0782803	-0.303011
	well-fed	46	16	-1.70197	2.19728	4.15732	0.00777318	-0.486365
	well-fed	47	16	-1.56845	2.31922	3.81393	0.0761429	-0.509838
	well-fed	48	16	-1.86148	2.43697	4.00851	-0.0360584	-0.366121
	well-fed	49	16	-1.72366	2.25429	3.70803	-0.00240918	-0.365087
	well-fed	50	16	-1.83647	2.18262	4.08255	0.168047	-0.430932
	well-fed	51	16	-1.39245	2.20828	3.4879	-0.100963	-0.488716
	well-fed	52	16	-1.79421	2.09181	4.07528	0.239353	-0.493254
	well-fed	53	16	-1.79389	2.16534	4.22002	0.189897	-0.511912
	well-fed	54	16	-1.79392	2.50337	3.90495	-0.090174	-0.382156
	well-fed	55	16	-1.71155	2.37854	3.76559	-0.0295358	-0.417662
	well-fed	56	16	-1.73708	2.37063	3.99626	-0.00335264	-0.440122
	well-fed	57	16	-1.60902	2.44863	4.13327	0.133936	-0.623921
	well-fed	58	16	-1.52254	2.20739	3.13158	-0.106208	-0.359153
	well-fed	59	16	-1.67195	2.27331	3.91493	0.0676349	-0.488564
	well-fed	60	16	-1.48596	2.30414	3.16798	-0.11341	-0.448206
	well-fed	61	16	-1.75663	2.25919	4.07293	0.098939	-0.451974
	well-fed	62	16	-1.71531	2.3923	3.60899	-0.203849	-0.310277
	well-fed	63	16	-1.70084	2.28978	3.67796	-0.0546177	-0.374023
	well-fed	64	16	-1.74319	2.14595	3.56544	0.103756	-0.366442
	well-fed	65	16	-1.85282	2.4165	4.16232	-0.0209844	-0.372213
	well-fed	66	16	-1.64805	2.18475	3.83955	0.107675	-0.492954
	well-fed	67	16	-1.76868	2.48791	4.03237	0.0627084	-0.501371
	well-fed	68	16	-1.70641	2.15551	4.00653	0.154659	-0.475538
	well-fed	69	16	-1.76747	2.40081	4.26559	-0.132067	-0.446484
	well-fed	70	16	-1.7751	2.4156	4.00034	-0.0430618	-0.447534
	well-fed	71	16	-1.54592	2.15302	3.3037	-0.0443892	-0.415062
	well-fed	72	16	-1.69906	2.21552	3.78905	0.0169048	-0.427804
	well-fed	73	16	-1.59026	2.15221	3.69038	-0.0244934	-0.441759
	well-fed	74	16	-1.57267	2.33264	3.63048	-0.213758	-0.336707
	well-fed	75	16	-1.6316	2.2279	3.62126	0.0225726	-0.432384
	well-fed	76	16	-1.4858	2.2625	3.42066	0.13135	-0.553676
	well-fed	77	16	-1.58315	2.08338	3.76582	0.122462	-0.461431
	well-fed	78	16	-1.47924	2.15404	3.02378	-0.125218	-0.357556
	well-fed	79	16	-1.56191	2.47458	3.64533	-0.26691	-0.440442
	well-fed	80	16	-1.68315	2.18629	4.63127	0.284108	-0.644983
	well-fed	81	16	-1.73006	2.44723	4.12814	-0.00636024	-0.499936
	well-fed	82	16	-1.68559	2.57686	3.81118	-0.245982	-0.348172
	well-fed	83	16	-1.81856	2.29205	3.54578	0.00318426	-0.288022
	well-fed	84	16	-1.76708	2.40122	3.82601	0.0194511	-0.437406
	well-fed	85	16	-1.57112	2.21914	3.78258	0.0711244	-0.463053
	well-fed	86	16	-1.65621	2.31893	3.83276	-0.0163902	-0.459051
	well-fed	87	16	-1.4188	2.30187	3.20095	-0.158931	-0.378217
	well-fed	88	16	-1.75512	2.42757	4.09192	0.0954268	-0.513351
	well-fed	89	16	-1.75697	2.13646	4.35253	0.205209	-0.521653
	well-fed	90	16	-1.78799	2.18026	4.08569	0.173424	-0.554832
	well-fed	91	16	-1.84472	2.55755	3.99689	-0.0778378	-0.412583
	well-fed	92	16	-1.78989	2.1206	3.7157	0.104828	-0.372497
	well-fed	93	16	-1.92689	2.45753	4.3486	0.0452717	-0.459072
	well-fed	94	16	-1.68955	2.12967	4.06176	0.11464	-0.509047
	well-fed	95	16	-1.70156	2.199	3.95371	0.0765064	-0.480974
	well-fed	96	16	-1.7707	2.06109	3.88856	0.237784	-0.483038
	well-fed	97	16	-1.43886	2.16388	3.43543	0.0521373	-0.546379
	well-fed	98	16	-1.62019	2.09356	4.502	0.180355	-0.573287
	well-fed	99	16	-1.6628	2.29989	4.03855	0.0870957	-0.52494
	well-fed	100	16	-1.82924	2.47055	4.04697	0.0137023	-0.433259
	well-fed	1	17	-1.50368	2.2591	1.02073	-0.352898	-0.139987
	well-fed	2	17	-1.16629	2.19007	1.12938	-0.329825	-0.373382
	well-fed	3	17	-1.33575	2.2746	0.815065	-0.446929	-0.17034
	well-fed	4	17	-1.04973	2.04656	1.32039	-0.0974992	-0.536834
	well-fed	5	17	-1.07493	1.98437	1.46587	-0.339552	-0.381899
	well-fed	6	17	-1.38841	2.25174	0.898876	-0.370952	-0.206249
	well-fed	7	17	-0.963182	2.13475	0.973944	-0.391979	-0.395747
	well-fed	8	17	-1.72259	2.67153	1.8483	-0.362468	-0.324561
	well-fed	9	17	-1.18604	2.21082	0.156592	-0.443075	-0.129607
	well-fed	10	17	-1.36307	2.27492	1.16265	-0.46244	-0.136617
	well-fed	11	17	-1.02381	2.09275	1.38607	-0.0980626	-0.568694
	well-fed	12	17	-1.38906	2.2494	0.701336	-0.408728	-0.104835
	well-fed	13	17	-1.06385	2.01812	1.58623	-0.254007	-0.461789
	well-fed	14	17	-1.07632	2.14322	1.08226	-0.351794	-0.312095
	well-fed	15	17	-1.47617	2.14609	1.16835	-0.312782	-0.171201
	well-fed	16	17	-1.25855	2.03694	1.64966	-0.134214	-0.427196
	well-fed	17	17	-1.59454	2.39063	1.42791	-0.288296	-0.22454
	well-fed	18	17	-1.17686	2.23889	1.05647	-0.404572	-0.315763
	well-fed	19	17	-1.38273	2.26	1.02675	-0.383563	-0.164732
	well-fed	20	17	-1.6326	1.94989	1.32113	-0.279281	-0.0587207
	well-fed	21	17	-1.06313	2.16362	1.281	-0.355359	-0.408988
	well-fed	22	17	-1.06958	2.00732	1.19776	-0.192474	-0.383813
	well-fed	23	17	-1.15769	2.16451	1.63938	-0.248639	-0.450418
	well-fed	24	17	-1.2022	2.2286	1.33961	-0.253545	-0.421285
	well-fed	25	17	-1.39641	2.09652	0.984807	-0.43403	-0.111183
	well-fed	26	17	-0.995046	2.00292	1.37294	-0.25109	-0.416708
	well-fed	27	17	-1.04667	2.06126	1.18173	-0.3216	-0.364147
	well-fed	28	17	-1.49333	2.22282	1.30814	-0.286944	-0.206762
	well-fed	29	17	-1.51041	2.01768	1.21108	-0.247737	-0.158783
	well-fed	30	17	-1.59754	2.36081	1.39696	-0.478489	-0.0495088
	well-fed	31	17	-1.31492	2.24787	1.28725	-0.414483	-0.205892
	well-fed	32	17	-1.37115	2.24567	0.866234	-0.403353	-0.14369
	well-fed	33	17	-1.10206	2.1707	1.0846	-0.282673	-0.352517
	well-fed	34	17	-1.31571	2.19492	1.01743	-0.27864	-0.338269
	well-fed	35	17	-1.35148	2.16882	0.649705	-0.393718	-0.166474
	well-fed	36	17	-1.49069	2.18171	0.986746	-0.491396	-0.011211
	well-fed	37	17	-1.40407	2.20147	0.784381	-0.320186	-0.207644
	well-fed	38	17	-1.38116	2.03117	0.918219	-0.317398	-0.183786
	well-fed	39	17	-1.49244	2.13366	1.2833	-0.254496	-0.209177
	well-fed	40	17	-0.973022	1.95153	1.34967	-0.25559	-0.461385
	well-fed	41	17	-1.29428	2.10489	1.84056	-0.292777	-0.361884
	well-fed	42	17	-1.75813	2.23658	1.4131	-0.270216	-0.111468
	well-fed	43	17	-1.1216	2.06965	1.21494	-0.294392	-0.387096
	well-fed	44	17	-1.4784	2.11853	1.40207	-0.17731	-0.23179
	well-fed	45	17	-1.28052	1.92693	1.19478	-0.222637	-0.265695
	well-fed	46	17	-1.13078	2.30138	1.90024	-0.179559	-0.581267
	well-fed	47	17	-1.57714	2.61344	1.28759	-0.349668	-0.286316
	well-fed	48	17	-1.85334	2.61277	1.03226	-0.480697	0.000829646
	well-fed	49	17	-1.12695	2.10527	1.21212	-0.349735	-0.282818
	well-fed	50	17	-1.58724	2.06233	1.36029	-0.172352	-0.134379
	well-fed	51	17	-1.24547	1.92597	0.842042	-0.26703	-0.173109
	well-fed	52	17	-1.47411	2.01345	1.46518	-0.172985	-0.250533
	well-fed	53	17	-1.24428	2.0869	1.18635	-0.253069	-0.347566
	well-fed	54	17	-1.18382	2.26278	1.83785	-0.211305	-0.479419
	well-fed	55	17	-1.20427	2.041	1.32282	-0.0984157	-0.418372
	well-fed	56	17	-1.56996	2.17689	1.39981	-0.401378	-0.0959014
	well-fed	57	17	-0.95425	1.89397	1.14706	-0.158313	-0.430372
	well-fed	58	17	-0.974398	2.05143	0.967015	-0.404364	-0.275162
	well-fed	59	17	-1.30554	2.22753	0.71967	-0.443366	-0.104111
	well-fed	60	17	-1.43418	2.19491	1.15803	-0.422354	-0.148649
	well-fed	61	17	-1.59182	2.33167	0.931606	-0.444148	-0.00367846
	well-fed	62	17	-1.3395	2.22401	0.884164	-0.560629	-0.0528617
	well-fed	63	17	-1.01544	2.17041	1.11986	-0.313686	-0.428495
	well-fed	64	17	-0.957527	1.93676	1.20402	-0.23545	-0.426783
	well-fed	65	17	-1.5065	2.39496	0.778259	-0.548441	0.0128113
	well-fed	66	17	-0.972912	2.01965	1.54401	-0.182619	-0.524845
	well-fed	67	17	-1.22958	2.23801	1.20615	-0.348047	-0.325956
	well-fed	68	17	-0.961116	2.06452	1.50489	-0.320156	-0.420553
	well-fed	69	17	-1.05963	2.20939	1.39248	-0.223011	-0.529742
	well-fed	70	17	-1.56975	2.18629	0.92668	-0.432256	-0.0633681
	well-fed	71	17	-0.943609	2.08232	1.22496	-0.371529	-0.390935
	well-fed	72	17	-1.44764	2.15362	0.789806	-0.419775	-0.0527152
	well-fed	73	17	-1.49903	2.23051	0.927639	-0.443756	-0.0771817
	well-fed	74	17	-1.53197	2.24559	0.908244	-0.385942	-0.101166
	well-fed	75	17	-0.865787	2.12707	1.08188	-0.344287	-0.459505
	well-fed	76	17	-1.2805	2.05081	0.7584	-0.24781	-0.214542
	well-fed	77	17	-1.14352	2.02717	1.17356	-0.102436	-0.44849
	well-fed	78	17	-1.49784	2.03485	1.25507	-0.219151	-0.180049
	well-fed	79	17	-1.52154	2.25869	1.31086	-0.341112	-0.170466
	well-fed	80	17	-1.44827	2.11635	1.57185	-0.219217	-0.249695
	well-fed	81	17	-1.16259	2.04852	1.26939	-0.307822	-0.331302
	well-fed	82	17	-1.26474	2.44448	0.997509	-0.477025	-0.256825
	well-fed	83	17	-1.05551	2.12625	0.909015	-0.390897	-0.279796
	well-fed	84	17	-1.09363	2.10294	1.41491	-0.27845	-0.441302
	well-fed	85	17	-1.48191	2.19072	0.747441	-0.386663	-0.076486
	well-fed	86	17	-1.50007	2.08045	1.165	-0.227324	-0.145859
	well-fed	87	17	-1.10319	2.28603	1.52816	-0.320599	-0.447918
	well-fed	88	17	-1.30607	2.0977	0.862327	-0.251559	-0.228448
	well-fed	89	17	-1.60019	2.33834	1.56727	-0.256276	-0.239797
	well-fed	90	17	-1.02603	1.84461	1.05809	-0.246393	-0.369772
	well-fed	91	17	-1.02061	2.18859	1.08612	-0.311202	-0.43689
	well-fed	92	17	-1.43324	2.12635	0.765346	-0.352636	-0.0910282
	well-fed	93	17	-1.05067	2.05751	1.82371	-0.203671	-0.518972
	well-fed	94	17	-1.06431	1.80572	1.67654	0.084845	-0.601121
	well-fed	95	17	-1.21143	2.08645	0.4702	-0.417075	-0.142774
	well-fed	96	17	-1.43216	1.8096	1.15801	-0.120653	-0.165755
	well-fed	97	17	-1.13822	2.05337	1.7719	-0.0866149	-0.519385
	well-fed	98	17	-1.43643	2.24573	1.42828	-0.395125	-0.188096
	well-fed	99	17	-0.935612	2.22691	1.29074	-0.158914	-0.574238
	well-fed	100	17	-1.12977	2.01507	1.55786	-0.134806	-0.465185
	well-fed	1	18	-1.38016	2.37924	1.24107	-0.227907	-0.292584
	well-fed	2	18	-1.31842	2.46618	1.17706	-0.460501	-0.230815
	well-fed	3	18	-1.31335	2.4896	0.84532	-0.444987	-0.185852
	well-fed	4	18	-1.10884	2.30166	1.51976	-0.0871164	-0.559168
	well-fed	5	18	-1.21099	2.23672	1.32011	-0.252162	-0.349215
	well-fed	6	18	-1.31192	2.47346	1.00036	-0.422966	-0.233247
	well-fed	7	18	-1.1035	2.38608	1.08602	-0.349381	-0.371934
	well-fed	8	18	-1.27475	2.42561	1.62129	-0.200251	-0.452329
	well-fed	9	18	-1.26534	2.45085	0.379493	-0.488795	-0.0984635
	well-fed	10	18	-1.33703	2.49195	1.59116	-0.29689	-0.317854
	well-fed	11	18	-1.15581	2.34532	1.51843	-0.247948	-0.441364
	well-fed	12	18	-1.31587	2.19158	0.833731	-0.296944	-0.150838
	well-fed	13	18	-1.20883	2.21586	1.78415	-0.0787302	-0.487558
	well-fed	14	18	-1.03749	2.43584	1.40567	-0.383099	-0.404736
	well-fed	15	18	-1.23355	2.24574	1.04237	-0.205578	-0.323259
	well-fed	16	18	-1.26675	2.33483	2.03689	-0.135464	-0.489066
	well-fed	17	18	-1.36678	2.4087	1.23807	-0.192178	-0.30133
	well-fed	18	18	-1.17272	2.34076	1.2268	-0.31602	-0.367868
	well-fed	19	18	-1.39529	2.41746	1.31659	-0.317825	-0.238958
	well-fed	20	18	-1.27735	2.23016	1.04374	-0.230093	-0.278838
	well-fed	21	18	-1.09055	2.38422	1.30467	-0.305792	-0.434639
	well-fed	22	18	-1.04229	2.30759	1.51142	-0.170872	-0.512121
	well-fed	23	18	-1.14038	2.34777	1.23488	-0.333316	-0.364764
	well-fed	24	18	-1.43323	2.50704	1.67419	-0.248896	-0.338508
	well-fed	25	18	-1.39944	2.47005	1.21915	-0.406108	-0.200072
	well-fed	26	18	-1.27918	2.27213	1.50877	-0.195185	-0.341907
	well-fed	27	18	-1.28542	2.33407	1.35437	-0.293794	-0.288806
	well-fed	28	18	-1.30105	2.3683	1.39216	-0.280958	-0.336238
	well-fed	29	18	-1.37028	2.40428	1.33632	-0.214595	-0.309362
	well-fed	30	18	-1.50506	2.49311	1.17058	-0.356676	-0.140915
	well-fed	31	18	-1.45733	2.44056	1.50102	-0.30302	-0.215501
	well-fed	32	18	-1.25759	2.38017	1.22591	-0.373288	-0.261321
	well-fed	33	18	-1.14377	2.38725	1.45343	-0.24625	-0.430382
	well-fed	34	18	-1.12993	2.34878	0.724196	-0.323102	-0.340673
	well-fed	35	18	-1.34595	2.48439	0.877379	-0.306401	-0.25343
	well-fed	36	18	-1.29362	2.40761	1.05345	-0.329279	-0.248816
	well-fed	37	18	-1.31089	2.29811	0.922279	-0.224779	-0.296471
	well-fed	38	18	-1.35157	2.31151	1.04487	-0.283022	-0.207603
	well-fed	39	18	-1.22944	2.25825	1.39231	-0.0166731	-0.463454
	well-fed	40	18	-1.06119	2.30965	1.37365	-0.292132	-0.44414
	well-fed	41	18	-0.972906	2.29427	1.13577	-0.37488	-0.418016
	well-fed	42	18	-1.51877	2.37942	1.05072	-0.341459	-0.141207
	well-fed	43	18	-1.12553	2.24927	1.42203	-0.208632	-0.435648
	well-fed	44	18	-1.41074	2.25274	1.43446	-0.137684	-0.299143
	well-fed	45	18	-1.23619	2.41622	1.30401	-0.35021	-0.330755
	well-fed	46	18	-1.30298	2.39963	1.59353	-0.248748	-0.399417
	well-fed	47	18	-1.16099	2.33095	0.896716	-0.218829	-0.345765
	well-fed	48	18	-1.3438	2.4303	1.01163	-0.327308	-0.236625
	well-fed	49	18	-0.939882	2.37495	1.13241	-0.309601	-0.446683
	well-fed	50	18	-1.37842	2.40183	1.27342	-0.273766	-0.254624
	well-fed	51	18	-1.23068	2.45865	0.65968	-0.523807	-0.120462
	well-fed	52	18	-1.40148	2.39587	1.18764	-0.264048	-0.243404
	well-fed	53	18	-1.12747	2.27069	1.55533	-0.259716	-0.434126
	well-fed	54	18	-0.995826	2.24651	1.15376	-0.243316	-0.436191
	well-fed	55	18	-1.03744	2.34223	1.20969	-0.258062	-0.431856
	well-fed	56	18	-1.2545	2.31183	0.94904	-0.358006	-0.172913
	well-fed	57	18	-0.858772	2.40623	1.33916	-0.248269	-0.623403
	well-fed	58	18	-1.16561	2.29788	0.767701	-0.385455	-0.198585
	well-fed	59	18	-1.23459	2.26296	1.07125	-0.322366	-0.25021
	well-fed	60	18	-1.27282	2.29783	0.916648	-0.385329	-0.199514
	well-fed	61	18	-1.45674	2.44676	1.36044	-0.180547	-0.290751
	well-fed	62	18	-1.15691	2.33672	0.786436	-0.348138	-0.28311
	well-fed	63	18	-1.03152	2.35504	1.25185	-0.29458	-0.45906
	well-fed	64	18	-1.1302	2.22413	1.57248	-0.113161	-0.487874
	well-fed	65	18	-1.24328	2.40715	0.959695	-0.321742	-0.263151
	well-fed	66	18	-1.09788	2.36647	1.37748	-0.307387	-0.425293
	well-fed	67	18	-1.23959	2.35173	1.26055	-0.261476	-0.335234
	well-fed	68	18	-1.16806	2.29697	1.66596	-0.259512	-0.392267
	well-fed	69	18	-1.08422	2.43089	1.43042	-0.335392	-0.437537
	well-fed	70	18	-1.45059	2.40761	1.14124	-0.306803	-0.211182
	well-fed	71	18	-1.17988	2.27479	1.56512	-0.278218	-0.361252
	well-fed	72	18	-1.37165	2.31471	1.0157	-0.309345	-0.215073
	well-fed	73	18	-1.45954	2.44091	1.13929	-0.336808	-0.181693
	well-fed	74	18	-1.69355	2.52749	1.36866	-0.478971	0.0123878
	well-fed	75	18	-0.988102	2.25039	1.3273	-0.209742	-0.489418
	well-fed	76	18	-1.44331	2.43525	1.05717	-0.353525	-0.17094
	well-fed	77	18	-0.92686	2.17935	0.889856	-0.137247	-0.497569
	well-fed	78	18	-1.31081	2.39108	0.803843	-0.442782	-0.147544
	well-fed	79	18	-1.31664	2.48973	1.18495	-0.387741	-0.228545
	well-fed	80	18	-1.50903	2.45026	1.61794	-0.253713	-0.246128
	well-fed	81	18	-1.01932	2.32714	1.46194	-0.223732	-0.498173
	well-fed	82	18	-1.06727	2.39421	1.07649	-0.353173	-0.380685
	well-fed	83	18	-1.04295	2.14308	0.985949	-0.254225	-0.337559
	well-fed	84	18	-1.16567	2.47494	1.66118	-0.261645	-0.493175
	well-fed	85	18	-1.60257	2.49923	1.04567	-0.438652	-0.0203073
	well-fed	86	18	-1.57353	2.41258	1.13391	-0.375907	-0.0875912
	well-fed	87	18	-1.16914	2.29292	1.02779	-0.32194	-0.285168
	well-fed	88	18	-1.41905	2.32247	0.947222	-0.280654	-0.155699
	well-fed	89	18	-1.37353	2.31638	1.17337	-0.269291	-0.2359
	well-fed	90	18	-1.09007	2.13467	1.16811	-0.156424	-0.409933
	well-fed	91	18	-1.06592	2.21646	1.04077	-0.209357	-0.403796
	well-fed	92	18	-1.23054	2.33557	0.91969	-0.333253	-0.256866
	well-fed	93	18	-1.14007	2.21926	1.54108	-0.193709	-0.431751
	well-fed	94	18	-1.39113	2.33294	1.68953	-0.1742	-0.36999
	well-fed	95	18	-1.2197	2.43388	0.758772	-0.334104	-0.266063
	well-fed	96	18	-1.50092	2.19524	1.02334	-0.349978	-0.043629
	well-fed	97	18	-1.0709	2.26215	1.37023	-0.153882	-0.487655
	well-fed	98	18	-1.19504	2.36345	1.2121	-0.369888	-0.308278
	well-fed	99	18	-1.08664	2.31675	0.998552	-0.203493	-0.422133
	well-fed	100	18	-1.21467	2.35455	1.57763	-0.152327	-0.455575
	well-fed	1	19	-0.987009	1.7389	3.33749	0.0616799	-0.572718
	well-fed	2	19	-0.882757	1.7577	3.12867	-0.12106	-0.511489
	well-fed	3	19	-0.830586	1.82253	3.40014	0.0461967	-0.714214
	well-fed	4	19	-0.97995	1.79479	3.17548	0.0903092	-0.598846
	well-fed	5	19	-0.882715	1.64151	3.12054	-0.117169	-0.449149
	well-fed	6	19	-1.01353	1.91678	2.90531	-0.110186	-0.473583
	well-fed	7	19	-0.63049	1.57607	2.73571	0.00125395	-0.636399
	well-fed	8	19	-1.00323	1.9341	3.2482	-0.00254137	-0.617583
	well-fed	9	19	-0.64769	1.68236	2.95279	0.0281565	-0.641269
	well-fed	10	19	-0.833836	1.92136	3.24246	-0.0549485	-0.59905
	well-fed	11	19	-0.856108	1.73031	3.55314	0.123742	-0.70025
	well-fed	12	19	-0.752834	1.70894	3.09975	-0.0308267	-0.59745
	well-fed	13	19	-1.00882	1.82068	3.46578	0.023685	-0.612049
	well-fed	14	19	-0.788765	1.73782	2.86426	-0.0465929	-0.541812
	well-fed	15	19	-0.773659	1.63506	3.22312	0.0227635	-0.598963
	well-fed	16	19	-0.845203	1.66628	3.09012	-0.0189214	-0.541566
	well-fed	17	19	-0.927225	1.9458	3.65592	0.0818197	-0.732809
	well-fed	18	19	-0.97088	1.93041	3.05548	-0.106214	-0.513527
	well-fed	19	19	-0.840397	1.87773	3.08691	-0.02937	-0.5539
	well-fed	20	19	-0.964008	1.46321	3.11315	0.0908356	-0.477713
	well-fed	21	19	-0.922749	1.85434	3.41804	-0.0160559	-0.623193
	well-fed	22	19	-0.810536	1.67633	3.07267	0.0382933	-0.57524
	well-fed	23	19	-1.10846	1.92386	3.66634	0.0657708	-0.605695
	well-fed	24	19	-0.88659	1.83845	3.29074	-0.104506	-0.544473
	well-fed	25	19	-0.813805	1.75362	3.26404	-0.0681558	-0.611831
	well-fed	26	19	-0.820931	1.72712	3.1902	0.0567215	-0.607728
	well-fed	27	19	-0.854552	1.80675	3.14918	-0.143293	-0.507335
	well-fed	28	19	-0.962377	1.76127	3.39315	0.0171351	-0.558717
	well-fed	29	19	-0.734028	1.54532	3.50245	0.157972	-0.731618
	well-fed	30	19	-1.16961	2.02074	3.27522	-0.204462	-0.356201
	well-fed	31	19	-1.08138	2.00806	3.27956	-0.10087	-0.49489
	well-fed	32	19	-0.87859	1.73808	3.24739	0.0838468	-0.635968
	well-fed	33	19	-0.745207	1.78835	3.08682	0.0143305	-0.615547
	well-fed	34	19	-0.646613	1.61706	3.2838	0.10026	-0.78091
	well-fed	35	19	-0.845657	1.77644	2.74884	-0.124739	-0.535919
	well-fed	36	19	-1.00867	1.86396	3.33415	0.00961706	-0.565319
	well-fed	37	19	-0.945208	1.76544	3.22821	0.079441	-0.65278
	well-fed	38	19	-0.986242	1.73197	2.94216	0.0762224	-0.523595
	well-fed	39	19	-0.772995	1.63673	3.18755	0.0280833	-0.610688
	well-fed	40	19	-0.842859	1.77642	3.1202	-0.0473571	-0.577981
	well-fed	41	19	-0.67843	1.61652	3.35121	0.0770888	-0.736198
	well-fed	42	19	-0.934154	1.71081	3.14146	0.0808528	-0.539224
	well-fed	43	19	-0.833151	1.65149	3.18093	-0.0238339	-0.57546
	well-fed	44	19	-0.694504	1.55613	3.6293	0.211414	-0.783409
	well-fed	45	19	-0.98965	1.62142	2.79869	-0.165944	-0.318205
	well-fed	46	19	-0.82146	1.69167	3.5606	0.0281175	-0.665029
	well-fed	47	19	-0.836656	1.85741	3.22687	-0.0158432	-0.635378
	well-fed	48	19	-1.07823	1.90036	2.98594	-0.127959	-0.396401
	well-fed	49	19	-0.929427	1.87643	3.03971	-0.111606	-0.463704
	well-fed	50	19	-0.92722	1.74596	3.22203	0.0373833	-0.550291
	well-fed	51	19	-0.619834	1.60544	2.83999	-0.0476161	-0.58624
	well-fed	52	19	-0.953289	1.72031	3.30104	0.070063	-0.590541
	well-fed	53	19	-0.630296	1.50135	3.22666	0.121411	-0.708979
	well-fed	54	19	-0.968021	1.90752	3.33336	-0.0989896	-0.504413
	well-fed	55	19	-0.998213	1.74378	3.27697	0.0960307	-0.562741
	well-fed	56	19	-1.07454	1.83163	3.07798	-0.0100009	-0.50466
	well-fed	57	19	-0.856562	1.77439	2.87903	0.0180117	-0.558769
	well-fed	58	19	-0.636752	1.86398	2.97872	-0.125133	-0.613107
	well-fed	59	19	-0.855135	1.87496	2.93029	-0.078341	-0.540105
	well-fed	60	19	-0.928567	1.76245	3.14412	0.0161189	-0.558455
	well-fed	61	19	-0.940641	1.85213	2.95856	-0.0332254	-0.469478
	well-fed	62	19	-0.890355	1.8321	3.15874	-0.0184354	-0.611066
	well-fed	63	19	-0.721144	1.74514	2.74731	-0.0627939	-0.528481
	well-fed	64	19	-0.76652	1.63013	2.84784	0.0498366	-0.583648
	well-fed	65	19	-0.842884	1.90941	3.28775	-0.0609794	-0.570528
	well-fed	66	19	-0.805012	1.70061	3.13098	0.0894705	-0.647894
	well-fed	67	19	-0.952023	1.96288	3.49661	0.000526111	-0.654321
	well-fed	68	19	-0.808341	1.66947	2.93673	-0.01393	-0.5323
	well-fed	69	19	-0.694474	1.72344	3.47956	0.0406231	-0.745163
	well-fed	70	19	-0.978886	1.74536	3.17808	0.0117779	-0.553231
	well-fed	71	19	-0.826238	1.79634	3.13135	-0.0316123	-0.628674
	well-fed	72	19	-0.948412	1.68693	2.87945	0.0930304	-0.510659
	well-fed	73	19	-0.817297	1.71121	3.21921	-0.0317068	-0.590134
	well-fed	74	19	-0.806303	1.7982	2.99809	-0.0976047	-0.520451
	well-fed	75	19	-0.844642	1.86175	3.16349	-0.0842053	-0.568157
	well-fed	76	19	-0.799661	1.75183	2.61804	0.0900605	-0.616358
	well-fed	77	19	-0.89626	1.53266	3.16141	0.191511	-0.58434
	well-fed	78	19	-1.01592	1.67777	3.12073	0.0590638	-0.497733
	well-fed	79	19	-0.821697	1.82951	3.25154	-0.0383388	-0.598474
	well-fed	80	19	-1.00238	1.86159	3.53965	0.0532059	-0.609544
	well-fed	81	19	-1.00207	1.79118	3.08358	-0.0762341	-0.482848
	well-fed	82	19	-0.861201	1.86278	2.9383	-0.166865	-0.46041
	well-fed	83	19	-0.929685	1.78503	2.54578	-0.0318346	-0.408323
	well-fed	84	19	-1.05377	1.96623	3.24772	-0.138183	-0.500859
	well-fed	85	19	-0.862636	1.7242	3.33474	0.0371729	-0.576279
	well-fed	86	19	-0.89568	1.79564	2.94522	-0.0598332	-0.487728
	well-fed	87	19	-0.640095	1.79056	3.1508	-0.10303	-0.626964
	well-fed	88	19	-0.994016	1.73816	3.19717	0.149028	-0.588653
	well-fed	89	19	-0.865674	1.62757	3.34004	0.0668635	-0.58868
	well-fed	90	19	-0.957318	1.67507	2.55036	0.0295214	-0.50975
	well-fed	91	19	-1.06323	1.96905	3.36884	-0.0204669	-0.559635
	well-fed	92	19	-0.951914	1.5809	3.1359	0.0837532	-0.530982
	well-fed	93	19	-1.11897	2.04676	3.76357	0.0308092	-0.643792
	well-fed	94	19	-1.01544	1.7839	3.66519	0.167824	-0.689218
	well-fed	95	19	-0.887971	1.6691	3.04091	0.0817125	-0.586105
	well-fed	96	19	-1.05903	1.60242	3.28211	0.10469	-0.517855
	well-fed	97	19	-0.987939	1.92024	3.43056	0.049141	-0.632534
	well-fed	98	19	-0.78963	1.69599	3.62739	0.124718	-0.748402
	well-fed	99	19	-0.993143	1.87636	3.21242	-0.031209	-0.548749
	well-fed	100	19	-1.06215	1.99771	3.04589	-0.0492346	-0.486239
	well-fed	1	20	-1.38297	2.13104	1.17675	-0.252263	-0.261235
	well-fed	2	20	-0.932831	2.11116	1.43239	-0.26619	-0.515856
	well-fed	3	20	-1.33045	2.35195	1.24181	-0.288657	-0.337008
	well-fed	4	20	-0.88332	1.98787	1.69779	0.0657947	-0.73209
	well-fed	5	20	-0.899067	1.86763	1.74784	-0.198044	-0.512208
	well-fed	6	20	-1.11729	2.01556	1.53631	-0.0289447	-0.523891
	well-fed	7	20	-0.67835	2.00565	1.43971	-0.263194	-0.645114
	well-fed	8	20	-0.989753	2.08974	1.95621	-0.0982969	-0.643392
	well-fed	9	20	-1.18981	2.14227	0.339541	-0.310477	-0.205153
	well-fed	10	20	-1.34808	2.38831	1.84755	-0.282828	-0.379275
	well-fed	11	20	-0.75642	1.98692	1.78973	0.048242	-0.779873
	well-fed	12	20	-1.06134	1.93425	1.01727	-0.347564	-0.275694
	well-fed	13	20	-0.902008	1.97952	2.19535	0.0156162	-0.737501
	well-fed	14	20	-0.568386	2.01237	1.82543	-0.332346	-0.656995
	well-fed	15	20	-1.33779	2.1241	1.47766	-0.113646	-0.367701
	well-fed	16	20	-0.923619	2.01406	2.07624	-0.102539	-0.655467
	well-fed	17	20	-1.51625	2.48885	1.42838	-0.199962	-0.38401
	well-fed	18	20	-0.843202	2.09524	1.5483	-0.330262	-0.541635
	well-fed	19	20	-1.43348	2.30346	1.17681	-0.395715	-0.156814
	well-fed	20	20	-1.53564	1.99893	1.61813	-0.0603057	-0.257372
	well-fed	21	20	-0.811092	2.20522	1.72601	-0.268752	-0.663752
	well-fed	22	20	-0.591049	1.88031	1.62951	-0.197339	-0.651532
	well-fed	23	20	-1.06599	2.11127	1.98014	-0.122324	-0.582168
	well-fed	24	20	-1.11532	2.31234	1.69188	-0.213967	-0.544476
	well-fed	25	20	-1.30177	2.19655	1.28224	-0.363367	-0.241995
	well-fed	26	20	-0.902268	1.81603	1.79205	-0.00895602	-0.565361
	well-fed	27	20	-0.907662	2.05982	1.69233	-0.297724	-0.531638
	well-fed	28	20	-1.41695	2.21059	1.77292	-0.235026	-0.317256
	well-fed	29	20	-1.35117	2.13998	1.43916	-0.144767	-0.393046
	well-fed	30	20	-1.43176	2.11951	1.51876	-0.329698	-0.176079
	well-fed	31	20	-1.21301	2.20992	1.64115	-0.445119	-0.294436
	well-fed	32	20	-1.15306	2.13809	1.50485	-0.259662	-0.379205
	well-fed	33	20	-0.726973	1.86495	1.66285	-0.0395555	-0.652176
	well-fed	34	20	-1.25067	2.2429	1.10706	-0.181421	-0.433741
	well-fed	35	20	-1.35369	2.21759	0.914292	-0.262178	-0.276058
	well-fed	36	20	-1.18109	2.09123	1.37497	-0.193554	-0.369073
	well-fed	37	20	-1.38372	2.34247	1.10812	-0.270678	-0.365042
	well-fed	38	20	-1.31789	2.2733	1.29852	-0.370915	-0.282086
	well-fed	39	20	-1.32257	2.09209	1.55312	-0.0186833	-0.434141
	well-fed	40	20	-0.537721	1.77594	1.69076	-0.117946	-0.714587
	well-fed	41	20	-0.314679	1.6088	1.89156	-0.0460778	-0.833348
	well-fed	42	20	-1.51801	2.20409	1.45439	-0.133807	-0.304661
	well-fed	43	20	-0.845329	1.92083	1.63663	-0.112727	-0.60115
	well-fed	44	20	-1.33802	2.07029	1.4271	-0.0971479	-0.348693
	well-fed	45	20	-1.09882	2.21366	1.5398	-0.421131	-0.39449
	well-fed	46	20	-0.998706	2.01993	1.86328	-0.180691	-0.589036
	well-fed	47	20	-1.26823	2.1674	1.3501	-0.0871292	-0.451414
	well-fed	48	20	-1.45547	2.43045	1.19326	-0.430711	-0.211151
	well-fed	49	20	-0.654493	1.99459	1.74831	-0.2149	-0.627651
	well-fed	50	20	-1.38665	2.22443	1.32202	-0.262505	-0.268962
	well-fed	51	20	-1.04327	1.99209	1.02156	-0.288334	-0.318378
	well-fed	52	20	-1.52031	2.19875	1.78129	-0.14454	-0.355948
	well-fed	53	20	-0.460982	1.66213	2.15404	0.0381099	-0.841845
	well-fed	54	20	-0.708582	2.01116	1.86717	-0.25164	-0.644741
	well-fed	55	20	-0.865424	2.02575	1.65119	-0.000641922	-0.64826
	well-fed	56	20	-1.13092	2.13401	1.36254	-0.436143	-0.263047
	well-fed	57	20	-0.558718	1.9805	1.52744	-0.225027	-0.684616
	well-fed	58	20	-0.916988	1.91873	1.28171	-0.252764	-0.380558
	well-fed	59	20	-1.16663	2.09602	1.35946	-0.175039	-0.388753
	well-fed	60	20	-1.27508	2.18485	1.15241	-0.27635	-0.339252
	well-fed	61	20	-1.53066	2.30785	1.34775	-0.200147	-0.255578
	well-fed	62	20	-1.2256	2.32893	1.13032	-0.50542	-0.261306
	well-fed	63	20	-0.537981	1.81387	1.67075	-0.0170804	-0.772772
	well-fed	64	20	-0.574712	1.64812	1.7542	0.0466229	-0.735529
	well-fed	65	20	-1.1825	2.18223	1.19568	-0.242889	-0.339889
	well-fed	66	20	-0.612229	1.87002	1.9663	-0.0968829	-0.730725
	well-fed	67	20	-1.22363	2.30819	1.63903	-0.177818	-0.482984
	well-fed	68	20	-0.528147	1.62425	1.9495	-0.0799643	-0.652162
	well-fed	69	20	-0.571519	1.94592	1.86122	-0.103303	-0.790172
	well-fed	70	20	-1.49072	2.40016	1.17959	-0.37755	-0.236389
	well-fed	71	20	-0.727443	1.90775	1.74654	-0.283589	-0.567841
	well-fed	72	20	-1.48864	2.25476	1.28965	-0.26143	-0.232739
	well-fed	73	20	-1.40657	2.19045	1.19324	-0.277435	-0.207705
	well-fed	74	20	-1.45122	2.29582	1.40199	-0.367437	-0.192748
	well-fed	75	20	-0.567447	1.8922	1.8032	-0.118755	-0.722709
[truncated: 148,025 more rows]
